# Supplementary material
Source: publisher site journal article supplement (https://www.dovepress.com/article/441242)
Supplement: Supplementary file 1 [file get_supplementary_file.php]

**Supplementary tables**

|                        |                                                                                           |
|------------------------|-------------------------------------------------------------------------------------------|
| Supplementary table S1 | Overview of the samples of the GWAS statistics for gut microbiota, lung function and COPD |
| Supplementary table S2 | All SNPs included for Mendelian randomization (MR) analysis                               |
| Supplementary table S3 | All results of MR analysis                                                                |
| Supplementary table S4 | MR results of possible causal relationships                                               |
| Supplementary table S5 | Results of horizontal pleiotropy tests via MR-PRESSO                                      |
| Supplementary table S6 | Results of horizontal pleiotropy tests via MR-Egger                                       |
| Supplementary table S7 | Results of heterogeneity tests                                                            |
| Supplementary table S8 | Results of leave-one-out analysis                                                         |
| Supplementary table S9 | Results of reverse analysis                                                               |

Supplementary table S1: Overview of the samples of the GWAS statistics for gut microbiota, lung function and COPD

| Exposure: Gut microbiota |              |                 |          |
|--------------------------|--------------|-----------------|----------|
| Biobank/ Cohort          | Ethnicity    | Country         | Nsamples |
| BSPSPC                   | European     | Germany         | 721      |
| CARDIAb                  | AfroAmerican | USA             | 114      |
| CARDIAw                  | European     | USA             | 257      |
|                          |              |                 |          |
| COPSAC                   | European     | Denmark         | 380      |
| DanFunD16                | European     | Denmark         | 2396     |
| FGFP                     | European     | Belgian         | 2259     |
| FOCUS                    | European     | Germany         | 960      |
| GEM_HCE_v12              | European     | Canada          | 378      |
| GEM_HCE_v24              | Admixed      | Canada          | 203      |
| GEM_ICHIP_HCE            | European     | Canada          | 662      |
| GenR                     | Multiethnic  | The Netherlands | 1328     |
| HCHS/SOL                 | Hispanic     | USA             | 1097     |
| KSCS                     | East Asian   | South Korea     | 811      |
| LLD                      | European     | The Netherlands | 875      |
| METSIM                   | European     | Finland         | 522      |
| MIBS                     | European     | The Netherlands | 80       |
| NGRC                     | European     | USA             | 77       |
| NTR                      | European     | The Netherlands | 279      |
| PNP                      | Middle-East  | Israel          | 481      |
| POPCOL                   | European     | Sweden          | 134      |
| RS3                      | European     | The Netherlands | 1220     |
| SHIP                     | European     | Germany         | 996      |
| SHIP-TREND               | European     | Germany         | 905      |
| TwinsUK                  | European     | UK              | 1205     |

| Outcome: Lung function and COPD |           |         |        |          |          |          |
|---------------------------------|-----------|---------|--------|----------|----------|----------|
| Biobank/ Cohort                 | Ethnicity | Country | Traits | Nsamples |          |          |
| UK biobank                      | European  | UK      | FEV1   | 218074   |          |          |
|                                 |           |         | FVC    | 353214   |          |          |
|                                 |           |         | FEV1%  | 274918   |          |          |
| Biobank/ Cohort                 | Ethnicity | Country | Traits | Ncases   | Ncontrol | Nsamples |
| FinnGen                         | European  | Finland | COPD   | 16410    | 283589   | 299999   |

|    | A                                                                                   | B                | C                 | D             | E           | F             | G                   | H                                 |
|----|-------------------------------------------------------------------------------------|------------------|-------------------|---------------|-------------|---------------|---------------------|-----------------------------------|
| 1  | Supplementary table S2: All SNPs included for Mendelian randomization (MR) analysis |                  |                   |               |             |               |                     |                                   |
| 2  | SNP                                                                                 | other_allele.exp | effect_allele.exp | beta.exposure | se.exposure | pval.exposure | samplesize.exposure | exposure                          |
| 3  | rs6660520                                                                           | G                | A                 | 0.071148271   | 0.013449539 | 1.11E-07      | 16308               | class.Actinobacteria.id.419       |
| 4  | rs8047955                                                                           | G                | A                 | 0.05758155    | 0.011676216 | 8.34E-07      | 16306               | class.Actinobacteria.id.419       |
| 5  | rs7322849                                                                           | C                | T                 | 0.094446681   | 0.019297598 | 6.21E-07      | 16313               | class.Actinobacteria.id.419       |
| 6  | rs72767435                                                                          | C                | T                 | -0.126352156  | 0.027362598 | 2.57E-06      | 12898               | class.Actinobacteria.id.419       |
| 7  | rs134366                                                                            | A                | G                 | 0.111876589   | 0.023500975 | 1.50E-06      | 14302               | class.Actinobacteria.id.419       |
| 8  | rs10841473                                                                          | C                | G                 | -0.058376469  | 0.012335331 | 2.59E-06      | 16311               | class.Actinobacteria.id.419       |
| 9  | rs11745923                                                                          | T                | G                 | 0.056375863   | 0.011552908 | 1.58E-06      | 16312               | class.Actinobacteria.id.419       |
| 10 | rs1515761                                                                           | C                | T                 | 0.076231731   | 0.016988402 | 4.96E-06      | 15525               | class.Actinobacteria.id.419       |
| 11 | rs12899991                                                                          | T                | A                 | 0.071992324   | 0.015466108 | 4.03E-06      | 16182               | class.Actinobacteria.id.419       |
| 12 | rs12049045                                                                          | G                | A                 | 0.05104521    | 0.01143249  | 8.63E-06      | 16311               | class.Actinobacteria.id.419       |
| 13 | rs1376754                                                                           | A                | G                 | 0.050924155   | 0.011250292 | 6.71E-06      | 16182               | class.Actinobacteria.id.419       |
| 14 | rs11655079                                                                          | C                | T                 | -0.056067443  | 0.01242856  | 5.93E-06      | 16309               | class.Actinobacteria.id.419       |
| 15 | rs7700479                                                                           | A                | T                 | -0.076965305  | 0.017393272 | 8.62E-06      | 16313               | class.Actinobacteria.id.419       |
| 16 | rs80083040                                                                          | G                | T                 | 0.155783797   | 0.034801661 | 8.62E-06      | 8003                | class.Actinobacteria.id.419       |
| 17 | rs961091                                                                            | A                | G                 | 0.050125533   | 0.01125498  | 8.68E-06      | 16311               | class.Actinobacteria.id.419       |
| 18 | rs4945008                                                                           | G                | A                 | 0.054074066   | 0.012139345 | 5.39E-06      | 16313               | class.Actinobacteria.id.419       |
| 19 | rs857444                                                                            | T                | C                 | 0.050955263   | 0.011539048 | 8.92E-06      | 16312               | class.Actinobacteria.id.419       |
| 20 | rs9813022                                                                           | G                | A                 | -0.075127704  | 0.015386652 | 1.05E-06      | 9593                | class.Alphaproteobacteria.id.2379 |
| 21 | rs76784716                                                                          | G                | A                 | 0.133271299   | 0.026773761 | 5.09E-07      | 9593                | class.Alphaproteobacteria.id.2379 |
| 22 | rs140912403                                                                         | T                | C                 | -0.160677133  | 0.031770756 | 6.20E-07      | 8520                | class.Alphaproteobacteria.id.2379 |
| 23 | rs34569731                                                                          | G                | A                 | 0.070514454   | 0.015756373 | 7.38E-06      | 9115                | class.Alphaproteobacteria.id.2379 |
| 24 | rs10803434                                                                          | T                | A                 | -0.069274224  | 0.01488663  | 3.55E-06      | 9115                | class.Alphaproteobacteria.id.2379 |
| 25 | rs55876211                                                                          | T                | C                 | -0.080810954  | 0.01841593  | 7.54E-06      | 9589                | class.Alphaproteobacteria.id.2379 |
| 26 | rs7960664                                                                           | A                | G                 | 0.096948894   | 0.021514853 | 8.84E-06      | 9596                | class.Alphaproteobacteria.id.2379 |
| 27 | rs17061716                                                                          | C                | G                 | 0.092734145   | 0.020756923 | 9.33E-06      | 9465                | class.Alphaproteobacteria.id.2379 |
| 28 | rs12977163                                                                          | C                | G                 | 0.069023356   | 0.015382895 | 7.14E-06      | 9115                | class.Alphaproteobacteria.id.2379 |
| 29 | rs62285697                                                                          | T                | C                 | 0.080525582   | 0.018091166 | 9.76E-06      | 9115                | class.Alphaproteobacteria.id.2379 |
| 30 | rs77558518                                                                          | G                | A                 | -0.107254772  | 0.022287875 | 1.34E-06      | 15836               | class.Bacilli.id.1673             |
| 31 | rs57872228                                                                          | T                | C                 | -0.071477336  | 0.014664695 | 9.22E-07      | 17375               | class.Bacilli.id.1673             |
| 32 | rs35344081                                                                          | A                | G                 | 0.061952894   | 0.012706646 | 1.01E-06      | 17374               | class.Bacilli.id.1673             |
| 33 | rs78938557                                                                          | C                | T                 | 0.108007225   | 0.023285767 | 1.07E-06      | 15226               | class.Bacilli.id.1673             |
| 34 | rs11730038                                                                          | A                | G                 | -0.063074683  | 0.012871737 | 1.96E-06      | 17377               | class.Bacilli.id.1673             |
| 35 | rs76717940                                                                          | A                | T                 | 0.156331484   | 0.032594546 | 1.07E-06      | 8017                | class.Bacilli.id.1673             |
| 36 | rs1962325                                                                           | G                | C                 | 0.055421868   | 0.011478925 | 1.38E-06      | 17356               | class.Bacilli.id.1673             |
| 37 | rs74352383                                                                          | A                | T                 | -0.104495633  | 0.021708314 | 1.53E-06      | 16519               | class.Bacilli.id.1673             |
| 38 | rs9581006                                                                           | T                | C                 | 0.225309054   | 0.046769705 | 1.79E-06      | 4253                | class.Bacilli.id.1673             |
| 39 | rs11110282                                                                          | G                | A                 | -0.101189316  | 0.021737883 | 4.85E-06      | 16026               | class.Bacilli.id.1673             |
| 40 | rs4028634                                                                           | C                | T                 | 0.052061417   | 0.010984163 | 2.21E-06      | 17377               | class.Bacilli.id.1673             |
| 41 | rs694949                                                                            | G                | A                 | -0.081145978  | 0.018004225 | 7.60E-06      | 16600               | class.Bacilli.id.1673             |
| 42 | rs12797734                                                                          | C                | T                 | 0.057215761   | 0.012679292 | 7.21E-06      | 16902               | class.Bacilli.id.1673             |
| 43 | rs28564647                                                                          | G                | T                 | -0.061303431  | 0.013757893 | 7.81E-06      | 17368               | class.Bacilli.id.1673             |
| 44 | rs7666190                                                                           | A                | C                 | -0.104044367  | 0.024793431 | 8.47E-06      | 10436               | class.Bacilli.id.1673             |
| 45 | rs4459992                                                                           | C                | T                 | 0.053585401   | 0.011636181 | 4.30E-06      | 17362               | class.Bacilli.id.1673             |
| 46 | rs34989881                                                                          | G                | A                 | 0.111055893   | 0.024603898 | 6.55E-06      | 12966               | class.Bacilli.id.1673             |
| 47 | rs111552159                                                                         | G                | C                 | 0.128031637   | 0.028692104 | 9.13E-06      | 11350               | class.Bacilli.id.1673             |
| 48 | rs13068444                                                                          | G                | A                 | 0.060103454   | 0.013640742 | 9.53E-06      | 17260               | class.Bacilli.id.1673             |
| 49 | rs1595463                                                                           | A                | C                 | 0.04768644    | 0.010854727 | 7.97E-06      | 17358               | class.Bacilli.id.1673             |
| 50 | rs74663707                                                                          | T                | C                 | 0.097915445   | 0.022407373 | 8.46E-06      | 15769               | class.Bacilli.id.1673             |
| 51 | rs55773148                                                                          | A                | G                 | -0.121513597  | 0.023675903 | 3.90E-07      | 11349               | class.Bacteroidia.id.912          |

|     | A           | B | C | D            | E           | F        | G     | H                                |
|-----|-------------|---|---|--------------|-------------|----------|-------|----------------------------------|
| 52  | rs7631304   | A | G | -0.064577053 | 0.013295739 | 8.37E-07 | 18334 | class.Bacteroidia.id.912         |
| 53  | rs73975615  | A | G | -0.207017892 | 0.044263343 | 1.22E-06 | 3350  | class.Bacteroidia.id.912         |
| 54  | rs111845179 | C | T | 0.102647804  | 0.021384281 | 9.24E-07 | 16393 | class.Bacteroidia.id.912         |
| 55  | rs2032750   | C | T | -0.050839276 | 0.010680731 | 1.92E-06 | 17853 | class.Bacteroidia.id.912         |
| 56  | rs929878    | T | C | -0.054853206 | 0.012152954 | 4.73E-06 | 18334 | class.Bacteroidia.id.912         |
| 57  | rs13291169  | G | C | 0.068967579  | 0.014876501 | 3.75E-06 | 17513 | class.Bacteroidia.id.912         |
| 58  | rs17343978  | C | A | -0.055205684 | 0.012027767 | 8.36E-06 | 18334 | class.Bacteroidia.id.912         |
| 59  | rs72706335  | C | T | -0.222409754 | 0.049345816 | 7.66E-06 | 3819  | class.Bacteroidia.id.912         |
| 60  | rs11146701  | G | A | 0.047359582  | 0.010540996 | 7.08E-06 | 18220 | class.Bacteroidia.id.912         |
| 61  | rs62531359  | G | T | 0.065572807  | 0.014989058 | 9.09E-06 | 18320 | class.Bacteroidia.id.912         |
| 62  | rs4146051   | G | A | -0.107377003 | 0.024566124 | 8.76E-06 | 11372 | class.Bacteroidia.id.912         |
| 63  | rs79585701  | C | A | 0.064682288  | 0.01496282  | 9.99E-06 | 18334 | class.Bacteroidia.id.912         |
| 64  | rs4916508   | A | G | -0.046672941 | 0.010531247 | 8.47E-06 | 18324 | class.Bacteroidia.id.912         |
| 65  | rs62575403  | T | C | 0.140054866  | 0.031112824 | 7.06E-06 | 9668  | class.Bacteroidia.id.912         |
| 66  | rs4033856   | T | C | 0.083242265  | 0.016723677 | 5.17E-07 | 15945 | class.Betaproteobacteria.id.2867 |
| 67  | rs2367850   | C | G | 0.064005972  | 0.013037436 | 9.12E-07 | 16717 | class.Betaproteobacteria.id.2867 |
| 68  | rs6087811   | G | T | -0.097817738 | 0.019852201 | 7.44E-07 | 16184 | class.Betaproteobacteria.id.2867 |
| 69  | rs62395635  | C | T | 0.109740893  | 0.02360002  | 2.94E-06 | 15108 | class.Betaproteobacteria.id.2867 |
| 70  | rs2613606   | T | C | -0.051310589 | 0.010909103 | 2.20E-06 | 17146 | class.Betaproteobacteria.id.2867 |
| 71  | rs1928341   | G | A | 0.052558097  | 0.011040784 | 2.02E-06 | 17150 | class.Betaproteobacteria.id.2867 |
| 72  | rs72747231  | G | C | -0.137280671 | 0.029033768 | 2.06E-06 | 11344 | class.Betaproteobacteria.id.2867 |
| 73  | rs11128180  | G | A | 0.059294412  | 0.012876923 | 3.67E-06 | 17151 | class.Betaproteobacteria.id.2867 |
| 74  | rs2321387   | A | G | -0.049459619 | 0.010942399 | 5.80E-06 | 17149 | class.Betaproteobacteria.id.2867 |
| 75  | rs1511453   | G | A | 0.092349246  | 0.019915827 | 4.76E-06 | 17085 | class.Betaproteobacteria.id.2867 |
| 76  | rs9964679   | G | A | 0.052911029  | 0.011486591 | 4.85E-06 | 17151 | class.Betaproteobacteria.id.2867 |
| 77  | rs56386628  | T | C | -0.062225169 | 0.013568762 | 5.87E-06 | 17147 | class.Betaproteobacteria.id.2867 |
| 78  | rs320161    | G | A | 0.057228557  | 0.012619964 | 7.33E-06 | 17035 | class.Betaproteobacteria.id.2867 |
| 79  | rs75242906  | T | C | -0.121083253 | 0.028074987 | 9.27E-06 | 10803 | class.Betaproteobacteria.id.2867 |
| 80  | rs6815608   | C | T | 0.103803179  | 0.021088299 | 4.02E-07 | 16731 | class.Clostridia.id.1859         |
| 81  | rs112334273 | A | G | 0.064100812  | 0.012740366 | 3.81E-07 | 18217 | class.Clostridia.id.1859         |
| 82  | rs6814436   | C | T | 0.073999481  | 0.015081514 | 9.65E-07 | 18336 | class.Clostridia.id.1859         |
| 83  | rs72915163  | C | T | -0.058102511 | 0.012055746 | 1.34E-06 | 18317 | class.Clostridia.id.1859         |
| 84  | rs2273429   | G | A | -0.072403727 | 0.015310495 | 4.52E-06 | 18337 | class.Clostridia.id.1859         |
| 85  | rs10774377  | G | A | 0.052659008  | 0.011385834 | 3.24E-06 | 18330 | class.Clostridia.id.1859         |
| 86  | rs13179700  | C | T | 0.051193667  | 0.010956865 | 3.37E-06 | 18338 | class.Clostridia.id.1859         |
| 87  | rs6934062   | C | G | 0.052440576  | 0.01161154  | 6.53E-06 | 17859 | class.Clostridia.id.1859         |
| 88  | rs1842454   | A | G | -0.054720208 | 0.012733828 | 8.72E-06 | 18340 | class.Clostridia.id.1859         |
| 89  | rs10209007  | C | G | 0.079417263  | 0.018242714 | 9.89E-06 | 17812 | class.Clostridia.id.1859         |
| 90  | rs76767978  | A | G | 0.069888247  | 0.015631881 | 8.40E-06 | 18329 | class.Clostridia.id.1859         |
| 91  | rs13105690  | C | T | -0.052909681 | 0.011817976 | 8.78E-06 | 18340 | class.Clostridia.id.1859         |
| 92  | rs76860606  | G | C | 0.094703578  | 0.022511672 | 7.53E-06 | 17579 | class.Clostridia.id.1859         |
| 93  | rs72738886  | C | T | 0.086616952  | 0.019039264 | 8.24E-06 | 16934 | class.Clostridia.id.1859         |
| 94  | rs7269302   | T | A | -0.096398079 | 0.021200675 | 9.04E-06 | 17405 | class.Clostridia.id.1859         |
| 95  | rs6797343   | T | G | 0.059227896  | 0.013455633 | 9.36E-06 | 18340 | class.Clostridia.id.1859         |
| 96  | rs13421739  | G | C | 0.088847155  | 0.017965467 | 9.54E-06 | 18340 | class.Clostridia.id.1859         |
| 97  | rs719099    | G | A | 0.077840173  | 0.01558151  | 5.43E-07 | 17687 | class.Coriobacteriia.id.809      |
| 98  | rs240104    | C | T | -0.060342897 | 0.012684911 | 1.52E-06 | 17577 | class.Coriobacteriia.id.809      |
| 99  | rs11250875  | C | T | 0.060749978  | 0.013093887 | 4.83E-06 | 17690 | class.Coriobacteriia.id.809      |
| 100 | rs34739816  | T | G | 0.096501674  | 0.020766582 | 3.88E-06 | 16593 | class.Coriobacteriia.id.809      |
| 101 | rs76779974  | G | C | 0.0774888    | 0.017187698 | 5.63E-06 | 16419 | class.Coriobacteriia.id.809      |
| 102 | rs80046645  | G | C | 0.255839805  | 0.056199532 | 4.66E-06 | 3204  | class.Coriobacteriia.id.809      |

|     | A           | B | C | D            | E           | F        | G     | H                                 |
|-----|-------------|---|---|--------------|-------------|----------|-------|-----------------------------------|
| 103 | rs1816223   | G | A | -0.058626474 | 0.012900576 | 4.84E-06 | 17688 | class.Coriobacteriia.id.809       |
| 104 | rs67561917  | G | A | -0.071436723 | 0.015411343 | 5.39E-06 | 17333 | class.Coriobacteriia.id.809       |
| 105 | rs3025411   | G | A | 0.092654285  | 0.020946781 | 8.27E-06 | 15671 | class.Coriobacteriia.id.809       |
| 106 | rs11656361  | C | A | 0.077300587  | 0.01755297  | 8.02E-06 | 16665 | class.Coriobacteriia.id.809       |
| 107 | rs1397793   | A | G | -0.049885455 | 0.011244635 | 9.77E-06 | 17527 | class.Coriobacteriia.id.809       |
| 108 | rs11073596  | G | T | 0.051021228  | 0.011433922 | 8.14E-06 | 17527 | class.Coriobacteriia.id.809       |
| 109 | rs2442778   | A | G | -0.116408329 | 0.025854513 | 9.03E-06 | 13472 | class.Coriobacteriia.id.809       |
| 110 | rs62448869  | A | T | -0.048605943 | 0.010898242 | 7.87E-06 | 17527 | class.Coriobacteriia.id.809       |
| 111 | rs13307134  | T | C | 0.056568602  | 0.012626474 | 7.80E-06 | 17527 | class.Coriobacteriia.id.809       |
| 112 | rs12974142  | A | G | 0.078979608  | 0.017720479 | 8.51E-06 | 17413 | class.Coriobacteriia.id.809       |
| 113 | rs8010111   | A | G | -0.10337688  | 0.022928631 | 6.90E-06 | 15996 | class.Coriobacteriia.id.809       |
| 114 | rs6058181   | T | C | 0.082571565  | 0.016595819 | 3.40E-07 | 15100 | class.Deltaproteobacteria.id.3087 |
| 115 | rs4506934   | T | C | -0.093651362 | 0.020120034 | 3.59E-06 | 15061 | class.Deltaproteobacteria.id.3087 |
| 116 | rs17791387  | G | A | -0.073588121 | 0.015424623 | 1.60E-06 | 15071 | class.Deltaproteobacteria.id.3087 |
| 117 | rs2838334   | A | G | 0.056172159  | 0.012412391 | 5.45E-06 | 15168 | class.Deltaproteobacteria.id.3087 |
| 118 | rs9928243   | A | C | -0.053845737 | 0.011771796 | 5.02E-06 | 15167 | class.Deltaproteobacteria.id.3087 |
| 119 | rs11599763  | C | T | -0.054421883 | 0.011739659 | 3.94E-06 | 15168 | class.Deltaproteobacteria.id.3087 |
| 120 | rs112381107 | T | C | 0.206594184  | 0.045690815 | 4.63E-06 | 4457  | class.Deltaproteobacteria.id.3087 |
| 121 | rs17084793  | A | G | -0.071076166 | 0.015953009 | 5.69E-06 | 15164 | class.Deltaproteobacteria.id.3087 |
| 122 | rs2692012   | G | A | 0.1103349    | 0.025333574 | 3.14E-06 | 13104 | class.Deltaproteobacteria.id.3087 |
| 123 | rs1035691   | G | A | -0.055175977 | 0.012160175 | 9.65E-06 | 15168 | class.Deltaproteobacteria.id.3087 |
| 124 | rs62020470  | G | A | -0.058541133 | 0.012935848 | 4.85E-06 | 15168 | class.Deltaproteobacteria.id.3087 |
| 125 | rs16851319  | C | G | -0.07055156  | 0.015084942 | 5.68E-06 | 15154 | class.Deltaproteobacteria.id.3087 |
| 126 | rs3935584   | T | C | -0.052348451 | 0.011566041 | 7.50E-06 | 15166 | class.Deltaproteobacteria.id.3087 |
| 127 | rs55744759  | G | A | -0.077969339 | 0.017073844 | 7.31E-06 | 15168 | class.Deltaproteobacteria.id.3087 |
| 128 | rs62504403  | T | C | 0.068115892  | 0.012788339 | 1.12E-07 | 16981 | class.Erysipelotrichia.id.2147    |
| 129 | rs7234058   | C | T | -0.094575892 | 0.019409083 | 9.12E-07 | 16874 | class.Erysipelotrichia.id.2147    |
| 130 | rs17530232  | G | A | 0.103049982  | 0.022464754 | 2.79E-06 | 16622 | class.Erysipelotrichia.id.2147    |
| 131 | rs2300774   | A | G | 0.052415201  | 0.010678379 | 8.95E-07 | 18216 | class.Erysipelotrichia.id.2147    |
| 132 | rs35161940  | C | T | -0.080604056 | 0.01676409  | 1.85E-06 | 18213 | class.Erysipelotrichia.id.2147    |
| 133 | rs10781552  | T | C | -0.055221236 | 0.011607425 | 2.33E-06 | 17789 | class.Erysipelotrichia.id.2147    |
| 134 | rs8003149   | T | C | 0.053879756  | 0.01168879  | 4.08E-06 | 18213 | class.Erysipelotrichia.id.2147    |
| 135 | rs4078432   | T | C | -0.060892934 | 0.013376363 | 4.23E-06 | 17789 | class.Erysipelotrichia.id.2147    |
| 136 | rs1074800   | G | A | 0.049243827  | 0.010887044 | 6.15E-06 | 17789 | class.Erysipelotrichia.id.2147    |
| 137 | rs56970041  | G | T | 0.072414447  | 0.016447064 | 5.40E-06 | 18217 | class.Erysipelotrichia.id.2147    |
| 138 | rs7826267   | G | T | -0.083907147 | 0.019913089 | 9.28E-06 | 17586 | class.Erysipelotrichia.id.2147    |
| 139 | rs1884466   | T | C | -0.047536345 | 0.01069386  | 9.53E-06 | 18205 | class.Erysipelotrichia.id.2147    |
| 140 | rs290833    | G | T | -0.049737371 | 0.011137647 | 8.03E-06 | 17789 | class.Erysipelotrichia.id.2147    |
| 141 | rs6706173   | C | A | 0.074250965  | 0.014639234 | 1.99E-07 | 16020 | class.Gammaproteobacteria.id.3303 |
| 142 | rs11181912  | A | G | -0.057915255 | 0.011879636 | 9.95E-07 | 16017 | class.Gammaproteobacteria.id.3303 |
| 143 | rs79795896  | G | A | -0.159209919 | 0.03513731  | 7.92E-06 | 7577  | class.Gammaproteobacteria.id.3303 |
| 144 | rs2234691   | C | T | 0.076290532  | 0.017196192 | 8.39E-06 | 16011 | class.Gammaproteobacteria.id.3303 |
| 145 | rs6469506   | A | T | 0.054142416  | 0.011633307 | 3.29E-06 | 16023 | class.Gammaproteobacteria.id.3303 |
| 146 | rs12404135  | G | A | -0.078884268 | 0.017241506 | 8.89E-06 | 15231 | class.Gammaproteobacteria.id.3303 |
| 147 | rs9973122   | A | T | 0.074061387  | 0.016259636 | 6.77E-06 | 15650 | class.Gammaproteobacteria.id.3303 |
| 148 | rs9494710   | T | C | -0.054967253 | 0.012092397 | 4.55E-06 | 15650 | class.Gammaproteobacteria.id.3303 |
| 149 | rs75101789  | T | C | 0.072901201  | 0.016300252 | 8.79E-06 | 16024 | class.Gammaproteobacteria.id.3303 |
| 150 | rs2825714   | G | A | -0.137410136 | 0.02892458  | 1.72E-06 | 4734  | class.Lentisphaeria.id.2250       |
| 151 | rs17114848  | A | G | 0.152376929  | 0.032433167 | 4.06E-06 | 4734  | class.Lentisphaeria.id.2250       |
| 152 | rs77599476  | G | A | 0.230291775  | 0.048016811 | 1.86E-06 | 3722  | class.Lentisphaeria.id.2250       |
| 153 | rs11770843  | T | C | 0.109430892  | 0.023487897 | 1.91E-06 | 4705  | class.Lentisphaeria.id.2250       |

|     | A           | B | C | D            | E           | F        | G     | H                             |
|-----|-------------|---|---|--------------|-------------|----------|-------|-------------------------------|
| 154 | rs72640280  | G | A | 0.220206945  | 0.048619648 | 5.18E-06 | 3816  | class.Lentisphaeria.id.2250   |
| 155 | rs62570196  | T | C | -0.216350467 | 0.043986577 | 1.08E-06 | 3712  | class.Lentisphaeria.id.2250   |
| 156 | rs2731834   | G | C | 0.109437835  | 0.023692997 | 4.24E-06 | 4733  | class.Lentisphaeria.id.2250   |
| 157 | rs2031282   | G | A | 0.122368503  | 0.027032933 | 4.38E-06 | 4734  | class.Lentisphaeria.id.2250   |
| 158 | rs1002941   | A | G | 0.105025041  | 0.023348442 | 8.15E-06 | 4734  | class.Lentisphaeria.id.2250   |
| 159 | rs73113483  | A | T | -0.131216985 | 0.0288713   | 8.66E-06 | 4718  | class.Lentisphaeria.id.2250   |
| 160 | rs9864379   | C | T | -0.159734555 | 0.029255297 | 5.36E-08 | 5777  | class.Melainabacteria.id.1589 |
| 161 | rs11150282  | C | T | 0.09894875   | 0.019697164 | 6.03E-07 | 5873  | class.Melainabacteria.id.1589 |
| 162 | rs16851659  | C | G | -0.089610337 | 0.01864323  | 1.27E-06 | 5884  | class.Melainabacteria.id.1589 |
| 163 | rs73074665  | T | A | 0.166215674  | 0.035572757 | 2.87E-06 | 5758  | class.Melainabacteria.id.1589 |
| 164 | rs4129395   | A | G | 0.08961869   | 0.01851058  | 1.48E-06 | 5887  | class.Melainabacteria.id.1589 |
| 165 | rs79790072  | C | T | 0.226721783  | 0.048784054 | 3.29E-06 | 4107  | class.Melainabacteria.id.1589 |
| 166 | rs10738747  | A | G | 0.081462422  | 0.018440929 | 9.96E-06 | 5884  | class.Melainabacteria.id.1589 |
| 167 | rs1221147   | A | T | 0.123968094  | 0.027895845 | 7.11E-06 | 5768  | class.Melainabacteria.id.1589 |
| 168 | rs113884518 | C | T | -0.20535201  | 0.045498234 | 8.06E-06 | 4442  | class.Melainabacteria.id.1589 |
| 169 | rs789069    | C | A | -0.103539228 | 0.023428675 | 6.85E-06 | 5879  | class.Melainabacteria.id.1589 |
| 170 | rs367480    | A | G | -0.08375796  | 0.018579584 | 8.20E-06 | 5887  | class.Melainabacteria.id.1589 |
| 171 | rs28678345  | C | T | 0.214848361  | 0.047087794 | 6.69E-06 | 4323  | class.Melainabacteria.id.1589 |
| 172 | rs10148250  | A | G | 0.086192825  | 0.019338072 | 8.67E-06 | 5453  | class.Melainabacteria.id.1589 |
| 173 | rs73457410  | G | A | 0.215339755  | 0.04366952  | 1.41E-06 | 3498  | class.Methanobacteria.id.119  |
| 174 | rs6776814   | C | T | -0.199565931 | 0.04118249  | 1.63E-06 | 3385  | class.Methanobacteria.id.119  |
| 175 | rs894996    | A | C | 0.216999069  | 0.044907554 | 1.88E-06 | 3582  | class.Methanobacteria.id.119  |
| 176 | rs75208022  | T | C | -0.227244713 | 0.048763001 | 5.92E-06 | 3203  | class.Methanobacteria.id.119  |
| 177 | rs12825290  | G | C | -0.216781075 | 0.049349641 | 6.08E-06 | 3144  | class.Methanobacteria.id.119  |
| 178 | rs56131665  | A | G | 0.178661188  | 0.039297982 | 6.18E-06 | 3572  | class.Methanobacteria.id.119  |
| 179 | rs4257531   | A | G | 0.164498365  | 0.03649593  | 7.44E-06 | 3162  | class.Methanobacteria.id.119  |
| 180 | rs6508769   | C | T | 0.15351913   | 0.034451866 | 8.23E-06 | 3319  | class.Methanobacteria.id.119  |
| 181 | rs73068003  | T | G | -0.158140381 | 0.035180317 | 8.45E-06 | 3692  | class.Methanobacteria.id.119  |
| 182 | rs10424197  | A | G | -0.111274175 | 0.024751678 | 9.28E-06 | 3698  | class.Methanobacteria.id.119  |
| 183 | rs74603314  | C | T | 0.221639279  | 0.046291765 | 1.56E-06 | 4499  | class.Mollicutes.id.3920      |
| 184 | rs10108398  | A | G | 0.076914215  | 0.015395275 | 1.09E-06 | 10932 | class.Mollicutes.id.3920      |
| 185 | rs11890098  | G | A | 0.074438031  | 0.015338858 | 9.57E-07 | 11392 | class.Mollicutes.id.3920      |
| 186 | rs72901605  | C | T | -0.084185237 | 0.01781192  | 3.26E-06 | 10526 | class.Mollicutes.id.3920      |
| 187 | rs3768491   | G | A | -0.068105197 | 0.01490611  | 4.23E-06 | 11002 | class.Mollicutes.id.3920      |
| 188 | rs17214486  | A | C | 0.060989958  | 0.013562263 | 6.61E-06 | 11387 | class.Mollicutes.id.3920      |
| 189 | rs12566890  | G | T | -0.101147132 | 0.023097845 | 3.65E-06 | 11371 | class.Mollicutes.id.3920      |
| 190 | rs78169027  | G | A | -0.108282943 | 0.023728915 | 5.88E-06 | 10542 | class.Mollicutes.id.3920      |
| 191 | rs4885016   | C | T | -0.081960567 | 0.018162779 | 7.27E-06 | 11388 | class.Mollicutes.id.3920      |
| 192 | rs28537087  | A | G | 0.08208727   | 0.018831168 | 8.07E-06 | 11382 | class.Mollicutes.id.3920      |
| 193 | rs2464826   | C | A | 0.094423946  | 0.021180616 | 8.40E-06 | 10998 | class.Mollicutes.id.3920      |
| 194 | rs6043847   | C | T | -0.11493717  | 0.024860602 | 4.55E-06 | 11130 | class.Mollicutes.id.3920      |
| 195 | rs1643968   | C | T | -0.056528439 | 0.011229806 | 4.15E-07 | 18170 | class.Negativicutes.id.2164   |
| 196 | rs60274479  | C | T | -0.065962286 | 0.013413689 | 1.16E-06 | 17610 | class.Negativicutes.id.2164   |
| 197 | rs13086907  | A | G | 0.062531199  | 0.013173503 | 1.95E-06 | 18163 | class.Negativicutes.id.2164   |
| 198 | rs73232831  | A | G | -0.151828859 | 0.03149318  | 1.87E-06 | 9382  | class.Negativicutes.id.2164   |
| 199 | rs71405394  | A | G | -0.114177822 | 0.02404996  | 2.17E-06 | 13861 | class.Negativicutes.id.2164   |
| 200 | rs61249479  | C | A | 0.077707533  | 0.01686282  | 2.95E-06 | 18165 | class.Negativicutes.id.2164   |
| 201 | rs1447205   | C | G | -0.050205329 | 0.010838203 | 2.93E-06 | 18165 | class.Negativicutes.id.2164   |
| 202 | rs4722181   | G | T | 0.050130576  | 0.010579796 | 2.00E-06 | 18163 | class.Negativicutes.id.2164   |
| 203 | rs4463806   | C | T | -0.05439664  | 0.012936525 | 7.81E-06 | 18160 | class.Negativicutes.id.2164   |
| 204 | rs9423647   | A | G | 0.047817029  | 0.010528201 | 6.06E-06 | 18164 | class.Negativicutes.id.2164   |

|     | A           | B | C | D            | E           | F        | G     | H                                 |
|-----|-------------|---|---|--------------|-------------|----------|-------|-----------------------------------|
| 205 | rs2834062   | G | A | 0.0489057    | 0.010884164 | 8.44E-06 | 18171 | class.Negativicutes.id.2164       |
| 206 | rs1649999   | G | A | 0.074898861  | 0.01664577  | 7.58E-06 | 18036 | class.Negativicutes.id.2164       |
| 207 | rs1135612   | A | G | 0.052978507  | 0.01191767  | 9.26E-06 | 18164 | class.Negativicutes.id.2164       |
| 208 | rs11729256  | C | T | 0.074979802  | 0.015017677 | 6.73E-07 | 11861 | class.Verrucomicrobiae.id.4029    |
| 209 | rs4936098   | G | A | 0.064884253  | 0.013592809 | 1.12E-06 | 11858 | class.Verrucomicrobiae.id.4029    |
| 210 | rs9349825   | G | A | -0.070403566 | 0.014712789 | 2.54E-06 | 11858 | class.Verrucomicrobiae.id.4029    |
| 211 | rs74542928  | C | T | 0.112163707  | 0.023642195 | 1.63E-06 | 11216 | class.Verrucomicrobiae.id.4029    |
| 212 | rs2602429   | T | C | 0.074684437  | 0.015619438 | 2.58E-06 | 11690 | class.Verrucomicrobiae.id.4029    |
| 213 | rs4242783   | A | G | 0.068929219  | 0.014769297 | 2.64E-06 | 11690 | class.Verrucomicrobiae.id.4029    |
| 214 | rs11184341  | C | G | 0.065534193  | 0.014223078 | 4.13E-06 | 11864 | class.Verrucomicrobiae.id.4029    |
| 215 | rs61779207  | A | G | -0.075830853 | 0.016776157 | 6.72E-06 | 11591 | class.Verrucomicrobiae.id.4029    |
| 216 | rs117107102 | G | A | 0.20468288   | 0.043157251 | 2.92E-06 | 4975  | class.Verrucomicrobiae.id.4029    |
| 217 | rs12908520  | A | G | 0.061892558  | 0.013094626 | 2.17E-06 | 11863 | class.Verrucomicrobiae.id.4029    |
| 218 | rs111862613 | C | T | 0.090698957  | 0.019674596 | 3.74E-06 | 11621 | class.Verrucomicrobiae.id.4029    |
| 219 | rs941682    | A | G | -0.063143598 | 0.014376741 | 9.61E-06 | 11809 | class.Verrucomicrobiae.id.4029    |
| 220 | rs6923842   | C | T | -0.079610621 | 0.016919247 | 2.21E-06 | 11904 | family.Acidaminococcaceae.id.2166 |
| 221 | rs6589457   | G | A | 0.165910976  | 0.034951601 | 2.32E-06 | 7386  | family.Acidaminococcaceae.id.2166 |
| 222 | rs2933324   | G | A | -0.066255706 | 0.014025652 | 2.24E-06 | 12525 | family.Acidaminococcaceae.id.2166 |
| 223 | rs262812    | C | T | -0.065674997 | 0.014225656 | 3.25E-06 | 12099 | family.Acidaminococcaceae.id.2166 |
| 224 | rs74540770  | A | G | -0.108969098 | 0.024353266 | 7.09E-06 | 10606 | family.Acidaminococcaceae.id.2166 |
| 225 | rs6427992   | C | G | -0.059585662 | 0.012960033 | 4.24E-06 | 12527 | family.Acidaminococcaceae.id.2166 |
| 226 | rs45497800  | C | T | -0.117862982 | 0.025735121 | 5.86E-06 | 11316 | family.Acidaminococcaceae.id.2166 |
| 227 | rs78702810  | C | T | -0.143755204 | 0.032324372 | 9.16E-06 | 7992  | family.Acidaminococcaceae.id.2166 |
| 228 | rs35011108  | G | A | 0.24182648   | 0.050379638 | 1.83E-06 | 3630  | family.Actinomycetaceae.id.421    |
| 229 | rs2889192   | T | G | 0.088753744  | 0.019500862 | 3.64E-06 | 7710  | family.Actinomycetaceae.id.421    |
| 230 | rs34583783  | T | G | 0.123755794  | 0.026426988 | 5.48E-06 | 7710  | family.Actinomycetaceae.id.421    |
| 231 | rs58484246  | C | T | 0.0761407    | 0.016900672 | 6.12E-06 | 7710  | family.Actinomycetaceae.id.421    |
| 232 | rs4073240   | A | G | 0.074754607  | 0.016468358 | 6.05E-06 | 7710  | family.Actinomycetaceae.id.421    |
| 233 | rs9537886   | C | A | -0.057088849 | 0.011068258 | 2.35E-07 | 16807 | family.Alcaligenaceae.id.2875     |
| 234 | rs4033856   | T | C | 0.081833964  | 0.016893105 | 1.03E-06 | 15623 | family.Alcaligenaceae.id.2875     |
| 235 | rs67737557  | G | C | 0.073840948  | 0.015167785 | 1.04E-06 | 15876 | family.Alcaligenaceae.id.2875     |
| 236 | rs17000015  | T | A | -0.060925748 | 0.012536315 | 1.13E-06 | 16377 | family.Alcaligenaceae.id.2875     |
| 237 | rs2367850   | C | G | 0.062910409  | 0.013171198 | 1.85E-06 | 16377 | family.Alcaligenaceae.id.2875     |
| 238 | rs7638039   | C | T | 0.060333529  | 0.012777892 | 2.70E-06 | 16791 | family.Alcaligenaceae.id.2875     |
| 239 | rs62395635  | C | T | 0.110582886  | 0.023851434 | 3.35E-06 | 14802 | family.Alcaligenaceae.id.2875     |
| 240 | rs112159068 | T | A | 0.131483982  | 0.028108868 | 3.56E-06 | 11656 | family.Alcaligenaceae.id.2875     |
| 241 | rs6969323   | C | A | -0.059356404 | 0.012913653 | 3.89E-06 | 16810 | family.Alcaligenaceae.id.2875     |
| 242 | rs7302582   | C | G | -0.106816521 | 0.023298022 | 3.34E-06 | 15113 | family.Alcaligenaceae.id.2875     |
| 243 | rs1153990   | G | A | -0.058726971 | 0.012830567 | 5.97E-06 | 16808 | family.Alcaligenaceae.id.2875     |
| 244 | rs9964679   | G | A | 0.053705118  | 0.011600815 | 4.47E-06 | 16810 | family.Alcaligenaceae.id.2875     |
| 245 | rs112135816 | G | T | -0.077505169 | 0.017155357 | 5.28E-06 | 15545 | family.Alcaligenaceae.id.2875     |
| 246 | rs147968    | T | C | 0.048947517  | 0.011032087 | 9.13E-06 | 16810 | family.Alcaligenaceae.id.2875     |
| 247 | rs74776516  | G | T | -0.09440518  | 0.021328653 | 6.85E-06 | 14502 | family.Alcaligenaceae.id.2875     |
| 248 | rs28480294  | C | T | -0.051696664 | 0.011550326 | 6.61E-06 | 16377 | family.Alcaligenaceae.id.2875     |
| 249 | rs6795673   | T | C | 0.053856525  | 0.010525127 | 3.38E-07 | 18301 | family.Bacteroidaceae.id.917      |
| 250 | rs28757219  | A | T | 0.081839827  | 0.017031866 | 1.29E-06 | 14833 | family.Bacteroidaceae.id.917      |
| 251 | rs9507307   | T | C | 0.060445621  | 0.012912793 | 2.13E-06 | 18184 | family.Bacteroidaceae.id.917      |
| 252 | rs66474973  | T | G | 0.081251539  | 0.016447899 | 6.81E-07 | 17405 | family.Bacteroidaceae.id.917      |
| 253 | rs11585893  | G | A | -0.074074561 | 0.014763325 | 1.80E-06 | 17821 | family.Bacteroidaceae.id.917      |
| 254 | rs495004    | G | C | -0.060747491 | 0.012986536 | 3.42E-06 | 17707 | family.Bacteroidaceae.id.917      |
| 255 | rs17619981  | G | T | 0.088097761  | 0.018700207 | 2.69E-06 | 15801 | family.Bacteroidaceae.id.917      |

|     | A           | B | C | D            | E           | F        | G     | H                                       |
|-----|-------------|---|---|--------------|-------------|----------|-------|-----------------------------------------|
| 256 | rs2023437   | C | T | -0.07823245  | 0.016763399 | 5.02E-06 | 17484 | family.Bacteroidaceae.id.917            |
| 257 | rs66710942  | T | C | 0.048803777  | 0.010741209 | 5.86E-06 | 17821 | family.Bacteroidaceae.id.917            |
| 258 | rs13207588  | G | A | -0.059204982 | 0.013119468 | 7.49E-06 | 17707 | family.Bacteroidaceae.id.917            |
| 259 | rs2366421   | A | T | -0.05281527  | 0.011712437 | 7.65E-06 | 18299 | family.Bacteroidaceae.id.917            |
| 260 | rs1340391   | C | T | -0.059200382 | 0.013224416 | 6.73E-06 | 18302 | family.Bacteroidaceae.id.917            |
| 261 | rs738193    | C | T | 0.084732776  | 0.016585588 | 3.82E-07 | 7778  | family.BacteroidalesS24.7group.id.11173 |
| 262 | rs941000    | T | C | 0.085026574  | 0.016338237 | 3.16E-07 | 7778  | family.BacteroidalesS24.7group.id.11173 |
| 263 | rs689695    | A | C | 0.081457787  | 0.016705675 | 1.28E-06 | 7954  | family.BacteroidalesS24.7group.id.11173 |
| 264 | rs17043785  | C | T | -0.176186835 | 0.034713295 | 5.12E-07 | 5208  | family.BacteroidalesS24.7group.id.11173 |
| 265 | rs10872669  | G | A | -0.123070536 | 0.027566518 | 9.49E-06 | 7368  | family.BacteroidalesS24.7group.id.11173 |
| 266 | rs12748533  | T | G | -0.082110804 | 0.017270056 | 2.59E-06 | 7948  | family.BacteroidalesS24.7group.id.11173 |
| 267 | rs6831034   | A | T | -0.095654602 | 0.020522806 | 6.10E-06 | 7576  | family.BacteroidalesS24.7group.id.11173 |
| 268 | rs61508842  | C | T | 0.122574311  | 0.027238851 | 7.83E-06 | 7576  | family.BacteroidalesS24.7group.id.11173 |
| 269 | rs78609301  | G | A | -0.086706514 | 0.019570857 | 7.09E-06 | 7953  | family.BacteroidalesS24.7group.id.11173 |
| 270 | rs11135366  | G | C | 0.084214168  | 0.01837388  | 8.78E-06 | 7953  | family.BacteroidalesS24.7group.id.11173 |
| 271 | rs7217209   | T | C | 0.084301877  | 0.018730791 | 8.43E-06 | 7745  | family.BacteroidalesS24.7group.id.11173 |
| 272 | rs7322849   | C | T | 0.110675689  | 0.020099551 | 1.74E-08 | 14915 | family.Bifidobacteriaceae.id.433        |
| 273 | rs76671854  | G | C | -0.089298109 | 0.018317684 | 1.04E-06 | 13923 | family.Bifidobacteriaceae.id.433        |
| 274 | rs4957061   | C | T | 0.056987252  | 0.011690731 | 1.15E-06 | 14795 | family.Bifidobacteriaceae.id.433        |
| 275 | rs10841473  | C | G | -0.061303123 | 0.012884445 | 2.28E-06 | 14914 | family.Bifidobacteriaceae.id.433        |
| 276 | rs4567981   | A | T | 0.057776313  | 0.011738841 | 8.88E-07 | 14795 | family.Bifidobacteriaceae.id.433        |
| 277 | rs13020688  | A | G | 0.058404469  | 0.012208136 | 1.57E-06 | 14795 | family.Bifidobacteriaceae.id.433        |
| 278 | rs677208    | C | G | 0.072858928  | 0.016482072 | 6.00E-06 | 14915 | family.Bifidobacteriaceae.id.433        |
| 279 | rs12446429  | C | T | 0.081009916  | 0.019073029 | 8.53E-06 | 14008 | family.Bifidobacteriaceae.id.433        |
| 280 | rs540489    | G | T | -0.06325184  | 0.013816951 | 5.37E-06 | 14688 | family.Bifidobacteriaceae.id.433        |
| 281 | rs857444    | T | C | 0.05539651   | 0.012066937 | 3.82E-06 | 14914 | family.Bifidobacteriaceae.id.433        |
| 282 | rs10857328  | A | T | 0.056200033  | 0.012639517 | 7.24E-06 | 14915 | family.Bifidobacteriaceae.id.433        |
| 283 | rs10831953  | A | G | 0.053753749  | 0.012374596 | 9.95E-06 | 14915 | family.Bifidobacteriaceae.id.433        |
| 284 | rs7174549   | T | C | 0.055172631  | 0.01246547  | 6.87E-06 | 14915 | family.Bifidobacteriaceae.id.433        |
| 285 | rs73797465  | G | T | -0.094261173 | 0.020842122 | 4.85E-06 | 14795 | family.Bifidobacteriaceae.id.433        |
| 286 | rs10496759  | C | G | 0.063713288  | 0.014430511 | 8.80E-06 | 14914 | family.Bifidobacteriaceae.id.433        |
| 287 | rs55888705  | G | A | 0.053672952  | 0.012058615 | 8.66E-06 | 14914 | family.Bifidobacteriaceae.id.433        |
| 288 | rs6899771   | G | A | -0.09143118  | 0.020260353 | 7.28E-06 | 14150 | family.Bifidobacteriaceae.id.433        |
| 289 | rs62573205  | A | G | -0.065480354 | 0.013350288 | 1.49E-06 | 16838 | family.Christensenellaceae.id.1866      |
| 290 | rs870002    | T | C | 0.048895121  | 0.010981691 | 6.54E-06 | 16847 | family.Christensenellaceae.id.1866      |
| 291 | rs12657403  | G | A | 0.078107959  | 0.017188664 | 5.59E-06 | 16245 | family.Christensenellaceae.id.1866      |
| 292 | rs117186816 | A | G | -0.206475619 | 0.043636232 | 6.52E-06 | 4310  | family.Christensenellaceae.id.1866      |
| 293 | rs9608766   | C | T | -0.068213442 | 0.01495997  | 3.33E-06 | 16185 | family.Christensenellaceae.id.1866      |
| 294 | rs4076564   | A | G | -0.188623195 | 0.039209045 | 8.06E-06 | 3730  | family.Christensenellaceae.id.1866      |
| 295 | rs4805124   | G | C | 0.048650752  | 0.010906688 | 8.36E-06 | 16847 | family.Christensenellaceae.id.1866      |
| 296 | rs72706624  | T | G | 0.088262607  | 0.019757489 | 6.38E-06 | 14869 | family.Christensenellaceae.id.1866      |
| 297 | rs77867022  | T | G | -0.160443345 | 0.037958856 | 8.82E-06 | 4033  | family.Christensenellaceae.id.1866      |
| 298 | rs7211194   | T | C | 0.049209379  | 0.011091636 | 9.94E-06 | 16436 | family.Christensenellaceae.id.1866      |
| 299 | rs892686    | G | A | 0.050610664  | 0.010965057 | 4.12E-06 | 16847 | family.Christensenellaceae.id.1866      |
| 300 | rs12380890  | G | A | -0.050397219 | 0.011104738 | 5.78E-06 | 16846 | family.Christensenellaceae.id.1866      |
| 301 | rs12186080  | A | G | 0.074823577  | 0.016245981 | 5.34E-06 | 14244 | family.Clostridiaceae1.id.1869          |
| 302 | rs2795528   | A | G | -0.180968849 | 0.039091059 | 3.81E-06 | 6411  | family.Clostridiaceae1.id.1869          |
| 303 | rs550843    | C | T | -0.073478656 | 0.016838326 | 7.09E-06 | 14234 | family.Clostridiaceae1.id.1869          |
| 304 | rs12341505  | A | G | 0.081450333  | 0.017933832 | 4.54E-06 | 14250 | family.Clostridiaceae1.id.1869          |
| 305 | rs4723021   | C | T | -0.106376242 | 0.024194378 | 7.42E-06 | 13682 | family.Clostridiaceae1.id.1869          |
| 306 | rs881532    | G | A | -0.053303513 | 0.011901062 | 7.90E-06 | 14250 | family.Clostridiaceae1.id.1869          |

|     | A           | B | C | D            | E           | F        | G     | H                                           |
|-----|-------------|---|---|--------------|-------------|----------|-------|---------------------------------------------|
| 307 | rs2817172   | T | C | 0.056336654  | 0.012392023 | 5.27E-06 | 13789 | family.Clostridiaceae1.id.1869              |
| 308 | rs10875374  | T | C | -0.053675937 | 0.011943586 | 8.10E-06 | 14253 | family.Clostridiaceae1.id.1869              |
| 309 | rs12490337  | G | C | -0.06169436  | 0.013693009 | 6.91E-06 | 14253 | family.Clostridiaceae1.id.1869              |
| 310 | rs62397761  | G | A | 0.061580452  | 0.013619788 | 9.08E-06 | 14248 | family.Clostridiaceae1.id.1869              |
| 311 | rs56188186  | G | A | 0.096777351  | 0.02174714  | 8.24E-06 | 13218 | family.Clostridiaceae1.id.1869              |
| 312 | rs55682560  | T | C | -0.131519432 | 0.026131877 | 4.97E-07 | 9183  | family.ClostridialesvadinBB60group.id.11286 |
| 313 | rs9979874   | C | G | -0.073892457 | 0.015091139 | 1.05E-06 | 10506 | family.ClostridialesvadinBB60group.id.11286 |
| 314 | rs28691777  | T | C | 0.137133741  | 0.026699624 | 6.96E-07 | 10199 | family.ClostridialesvadinBB60group.id.11286 |
| 315 | rs6588624   | A | G | -0.066231659 | 0.013814656 | 1.79E-06 | 10512 | family.ClostridialesvadinBB60group.id.11286 |
| 316 | rs7538034   | G | T | -0.078597952 | 0.016598223 | 2.37E-06 | 10420 | family.ClostridialesvadinBB60group.id.11286 |
| 317 | rs66714985  | C | A | 0.116907778  | 0.025244679 | 4.85E-06 | 10512 | family.ClostridialesvadinBB60group.id.11286 |
| 318 | rs118104867 | T | C | 0.214463834  | 0.04550976  | 3.44E-06 | 4095  | family.ClostridialesvadinBB60group.id.11286 |
| 319 | rs2191834   | T | G | 0.074637506  | 0.015913614 | 2.50E-06 | 10511 | family.ClostridialesvadinBB60group.id.11286 |
| 320 | rs7725895   | G | A | -0.116223759 | 0.024036718 | 3.94E-06 | 10512 | family.ClostridialesvadinBB60group.id.11286 |
| 321 | rs7226487   | G | A | -0.064368248 | 0.013870145 | 3.58E-06 | 10505 | family.ClostridialesvadinBB60group.id.11286 |
| 322 | rs10517600  | G | T | 0.062699295  | 0.01393642  | 6.83E-06 | 10512 | family.ClostridialesvadinBB60group.id.11286 |
| 323 | rs17121075  | A | G | 0.07692543   | 0.017223352 | 7.91E-06 | 10512 | family.ClostridialesvadinBB60group.id.11286 |
| 324 | rs10904722  | T | C | -0.067231397 | 0.014712327 | 5.05E-06 | 10512 | family.ClostridialesvadinBB60group.id.11286 |
| 325 | rs6755871   | G | C | -0.061382475 | 0.013897576 | 9.33E-06 | 10500 | family.ClostridialesvadinBB60group.id.11286 |
| 326 | rs34088226  | G | A | -0.117806973 | 0.026923974 | 7.66E-06 | 9716  | family.ClostridialesvadinBB60group.id.11286 |
| 327 | rs13409132  | G | A | -0.165418684 | 0.035215443 | 4.37E-06 | 5913  | family.ClostridialesvadinBB60group.id.11286 |
| 328 | rs989682    | G | A | 0.070193983  | 0.01553641  | 6.85E-06 | 10129 | family.ClostridialesvadinBB60group.id.11286 |
| 329 | rs719099    | G | A | 0.077840173  | 0.01558151  | 5.43E-07 | 17687 | family.Coriobacteriaceae.id.811             |
| 330 | rs240104    | C | T | -0.060342897 | 0.012684911 | 1.52E-06 | 17577 | family.Coriobacteriaceae.id.811             |
| 331 | rs11250875  | C | T | 0.060749978  | 0.013093887 | 4.83E-06 | 17690 | family.Coriobacteriaceae.id.811             |
| 332 | rs34739816  | T | G | 0.096501674  | 0.020766582 | 3.88E-06 | 16593 | family.Coriobacteriaceae.id.811             |
| 333 | rs76779974  | G | C | 0.0774888    | 0.017187698 | 5.63E-06 | 16419 | family.Coriobacteriaceae.id.811             |
| 334 | rs80046645  | G | C | 0.255839805  | 0.056199532 | 4.66E-06 | 3204  | family.Coriobacteriaceae.id.811             |
| 335 | rs1816223   | G | A | -0.058626474 | 0.012900576 | 4.84E-06 | 17688 | family.Coriobacteriaceae.id.811             |
| 336 | rs67561917  | G | A | -0.071436723 | 0.015411343 | 5.39E-06 | 17333 | family.Coriobacteriaceae.id.811             |
| 337 | rs3025411   | G | A | 0.092654285  | 0.020946781 | 8.27E-06 | 15671 | family.Coriobacteriaceae.id.811             |
| 338 | rs11656361  | C | A | 0.077300587  | 0.01755297  | 8.02E-06 | 16665 | family.Coriobacteriaceae.id.811             |
| 339 | rs1397793   | A | G | -0.049885455 | 0.011244635 | 9.77E-06 | 17527 | family.Coriobacteriaceae.id.811             |
| 340 | rs11073596  | G | T | 0.051021228  | 0.011433922 | 8.14E-06 | 17527 | family.Coriobacteriaceae.id.811             |
| 341 | rs2442778   | A | G | -0.116408329 | 0.025854513 | 9.03E-06 | 13472 | family.Coriobacteriaceae.id.811             |
| 342 | rs62448869  | A | T | -0.048605943 | 0.010898242 | 7.87E-06 | 17527 | family.Coriobacteriaceae.id.811             |
| 343 | rs13307134  | T | C | 0.056568602  | 0.012626474 | 7.80E-06 | 17527 | family.Coriobacteriaceae.id.811             |
| 344 | rs12974142  | A | G | 0.078979608  | 0.017720479 | 8.51E-06 | 17413 | family.Coriobacteriaceae.id.811             |
| 345 | rs8010111   | A | G | -0.10337688  | 0.022928631 | 6.90E-06 | 15996 | family.Coriobacteriaceae.id.811             |
| 346 | rs72731813  | T | C | -0.149751171 | 0.02934152  | 2.76E-07 | 7786  | family.Defluviitaleaceae.id.1924            |
| 347 | rs4677103   | G | A | 0.097720319  | 0.019703264 | 9.42E-07 | 8002  | family.Defluviitaleaceae.id.1924            |
| 348 | rs55658617  | C | T | 0.17731425   | 0.03618445  | 1.41E-06 | 6676  | family.Defluviitaleaceae.id.1924            |
| 349 | rs9725395   | G | A | -0.138356652 | 0.029518507 | 3.41E-06 | 8031  | family.Defluviitaleaceae.id.1924            |
| 350 | rs17051335  | T | C | -0.13431353  | 0.029220144 | 4.58E-06 | 8031  | family.Defluviitaleaceae.id.1924            |
| 351 | rs112893842 | C | T | 0.11076127   | 0.023254479 | 2.75E-06 | 8203  | family.Defluviitaleaceae.id.1924            |
| 352 | rs28696126  | T | A | -0.107106351 | 0.023817267 | 5.56E-06 | 7830  | family.Defluviitaleaceae.id.1924            |
| 353 | rs1582238   | C | T | 0.080192339  | 0.016706104 | 1.69E-06 | 8002  | family.Defluviitaleaceae.id.1924            |
| 354 | rs1908593   | C | T | 0.070222973  | 0.015660058 | 7.86E-06 | 8203  | family.Defluviitaleaceae.id.1924            |
| 355 | rs9608282   | G | T | 0.139013635  | 0.029942857 | 4.61E-06 | 7736  | family.Defluviitaleaceae.id.1924            |
| 356 | rs4344384   | T | G | 0.070880349  | 0.015612105 | 5.86E-06 | 8200  | family.Defluviitaleaceae.id.1924            |
| 357 | rs540220    | C | T | -0.123953592 | 0.028981413 | 9.48E-06 | 7887  | family.Defluviitaleaceae.id.1924            |

|     | A           | B | C | D            | E           | F        | G     | H                                  |
|-----|-------------|---|---|--------------|-------------|----------|-------|------------------------------------|
| 358 | rs6058181   | T | C | 0.083474185  | 0.016611075 | 2.70E-07 | 15074 | family.Desulfovibrionaceae.id.3169 |
| 359 | rs4506934   | T | C | -0.094338072 | 0.020137994 | 3.16E-06 | 15035 | family.Desulfovibrionaceae.id.3169 |
| 360 | rs2692012   | G | A | 0.11423063   | 0.025356811 | 1.56E-06 | 13080 | family.Desulfovibrionaceae.id.3169 |
| 361 | rs11599763  | C | T | -0.055593074 | 0.011749345 | 2.50E-06 | 15142 | family.Desulfovibrionaceae.id.3169 |
| 362 | rs2838334   | A | G | 0.057141929  | 0.012422992 | 3.82E-06 | 15142 | family.Desulfovibrionaceae.id.3169 |
| 363 | rs112381107 | T | C | 0.211435354  | 0.045696154 | 2.82E-06 | 4455  | family.Desulfovibrionaceae.id.3169 |
| 364 | rs16851319  | C | G | -0.073269696 | 0.015096375 | 2.40E-06 | 15128 | family.Desulfovibrionaceae.id.3169 |
| 365 | rs17791387  | G | A | -0.072925066 | 0.015438052 | 2.10E-06 | 15045 | family.Desulfovibrionaceae.id.3169 |
| 366 | rs9928243   | A | C | -0.054173165 | 0.011781876 | 4.48E-06 | 15141 | family.Desulfovibrionaceae.id.3169 |
| 367 | rs7164160   | T | A | -0.057445479 | 0.012946842 | 7.34E-06 | 15142 | family.Desulfovibrionaceae.id.3169 |
| 368 | rs3935584   | T | C | -0.052583842 | 0.011575741 | 6.78E-06 | 15140 | family.Desulfovibrionaceae.id.3169 |
| 369 | rs72647048  | C | T | -0.077008881 | 0.017089038 | 9.61E-06 | 15142 | family.Desulfovibrionaceae.id.3169 |
| 370 | rs78143293  | G | A | -0.084852127 | 0.017041521 | 1.20E-06 | 13572 | family.Enterobacteriaceae.id.3469  |
| 371 | rs111229068 | T | A | 0.110560883  | 0.024171888 | 3.65E-06 | 12350 | family.Enterobacteriaceae.id.3469  |
| 372 | rs62210023  | G | A | 0.060675357  | 0.013012497 | 3.13E-06 | 13515 | family.Enterobacteriaceae.id.3469  |
| 373 | rs504442    | G | T | 0.084159032  | 0.01894789  | 5.17E-06 | 13578 | family.Enterobacteriaceae.id.3469  |
| 374 | rs80319214  | G | C | 0.099040406  | 0.021587746 | 6.95E-06 | 12641 | family.Enterobacteriaceae.id.3469  |
| 375 | rs11026530  | C | T | 0.082240818  | 0.018637912 | 9.43E-06 | 13485 | family.Enterobacteriaceae.id.3469  |
| 376 | rs2374342   | A | C | 0.058292653  | 0.01261946  | 4.52E-06 | 13577 | family.Enterobacteriaceae.id.3469  |
| 377 | rs79757635  | A | C | 0.075859672  | 0.017128562 | 9.32E-06 | 13419 | family.Enterobacteriaceae.id.3469  |
| 378 | rs35673018  | A | G | 0.08996415   | 0.020293422 | 7.63E-06 | 13326 | family.Enterobacteriaceae.id.3469  |
| 379 | rs61973590  | G | C | -0.060539207 | 0.013369618 | 8.54E-06 | 13570 | family.Enterobacteriaceae.id.3469  |
| 380 | rs4792380   | T | A | 0.115597849  | 0.025768301 | 9.49E-06 | 12763 | family.Enterobacteriaceae.id.3469  |
| 381 | rs62504403  | T | C | 0.068115892  | 0.012788339 | 1.12E-07 | 16981 | family.Erysipelotrichaceae.id.2149 |
| 382 | rs7234058   | C | T | -0.094575892 | 0.019409083 | 9.12E-07 | 16874 | family.Erysipelotrichaceae.id.2149 |
| 383 | rs17530232  | G | A | 0.103049982  | 0.022464754 | 2.79E-06 | 16622 | family.Erysipelotrichaceae.id.2149 |
| 384 | rs2300774   | A | G | 0.052415201  | 0.010678379 | 8.95E-07 | 18216 | family.Erysipelotrichaceae.id.2149 |
| 385 | rs35161940  | C | T | -0.080604056 | 0.01676409  | 1.85E-06 | 18213 | family.Erysipelotrichaceae.id.2149 |
| 386 | rs10781552  | T | C | -0.055221236 | 0.011607425 | 2.33E-06 | 17789 | family.Erysipelotrichaceae.id.2149 |
| 387 | rs8003149   | T | C | 0.053879756  | 0.01168879  | 4.08E-06 | 18213 | family.Erysipelotrichaceae.id.2149 |
| 388 | rs4078432   | T | C | -0.060892934 | 0.013376363 | 4.23E-06 | 17789 | family.Erysipelotrichaceae.id.2149 |
| 389 | rs1074800   | G | A | 0.049243827  | 0.010887044 | 6.15E-06 | 17789 | family.Erysipelotrichaceae.id.2149 |
| 390 | rs56970041  | G | T | 0.072414447  | 0.016447064 | 5.40E-06 | 18217 | family.Erysipelotrichaceae.id.2149 |
| 391 | rs7826267   | G | T | -0.083907147 | 0.019913089 | 9.28E-06 | 17586 | family.Erysipelotrichaceae.id.2149 |
| 392 | rs1884466   | T | C | -0.047536345 | 0.01069386  | 9.53E-06 | 18205 | family.Erysipelotrichaceae.id.2149 |
| 393 | rs290833    | G | T | -0.049737371 | 0.011137647 | 8.03E-06 | 17789 | family.Erysipelotrichaceae.id.2149 |
| 394 | rs2155352   | G | A | -0.150537618 | 0.030231918 | 6.63E-07 | 3150  | family.FamilyXI.id.1936            |
| 395 | rs697771    | G | A | -0.117677217 | 0.025149135 | 3.19E-06 | 3152  | family.FamilyXI.id.1936            |
| 396 | rs10759623  | T | C | -0.162114556 | 0.032150976 | 5.78E-07 | 3156  | family.FamilyXI.id.1936            |
| 397 | rs11547158  | G | A | -0.177599232 | 0.037279461 | 2.70E-06 | 3133  | family.FamilyXI.id.1936            |
| 398 | rs488164    | G | T | 0.117997561  | 0.025515955 | 4.80E-06 | 3149  | family.FamilyXI.id.1936            |
| 399 | rs3733511   | G | A | 0.128253369  | 0.02747177  | 3.39E-06 | 3156  | family.FamilyXI.id.1936            |
| 400 | rs6025153   | C | G | 0.118618541  | 0.026196893 | 7.07E-06 | 3130  | family.FamilyXI.id.1936            |
| 401 | rs78222136  | C | G | 0.224834617  | 0.051167198 | 8.41E-06 | 3136  | family.FamilyXI.id.1936            |
| 402 | rs17379710  | C | T | -0.116383434 | 0.025212482 | 3.97E-06 | 3156  | family.FamilyXI.id.1936            |
| 403 | rs2156611   | C | T | -0.112486332 | 0.025109889 | 9.43E-06 | 3155  | family.FamilyXI.id.1936            |
| 404 | rs6501525   | G | A | 0.056155868  | 0.011558716 | 1.24E-06 | 16269 | family.FamilyXIII.id.1957          |
| 405 | rs118170811 | G | A | 0.151619208  | 0.031711234 | 1.80E-06 | 9645  | family.FamilyXIII.id.1957          |
| 406 | rs12643275  | T | A | -0.055090712 | 0.011647397 | 2.42E-06 | 16269 | family.FamilyXIII.id.1957          |
| 407 | rs1999289   | T | A | -0.063736569 | 0.013926964 | 2.54E-06 | 16269 | family.FamilyXIII.id.1957          |
| 408 | rs482905    | T | G | 0.059652844  | 0.012717031 | 3.72E-06 | 16737 | family.FamilyXIII.id.1957          |

|     | A           | B | C | D            | E           | F        | G     | H                                 |
|-----|-------------|---|---|--------------|-------------|----------|-------|-----------------------------------|
| 409 | rs3098182   | T | G | 0.05085114   | 0.011014044 | 4.04E-06 | 16731 | family.FamilyXIII.id.1957         |
| 410 | rs6797051   | T | C | -0.080598449 | 0.017136413 | 4.89E-06 | 16737 | family.FamilyXIII.id.1957         |
| 411 | rs66753613  | A | G | 0.065113557  | 0.014425125 | 8.08E-06 | 16269 | family.FamilyXIII.id.1957         |
| 412 | rs7514702   | C | T | -0.066323634 | 0.014162562 | 3.92E-06 | 16737 | family.FamilyXIII.id.1957         |
| 413 | rs7076829   | A | T | -0.051639411 | 0.011231289 | 4.76E-06 | 16269 | family.FamilyXIII.id.1957         |
| 414 | rs10404377  | A | C | -0.050318303 | 0.011165005 | 6.99E-06 | 16269 | family.FamilyXIII.id.1957         |
| 415 | rs4293737   | G | A | -0.112090617 | 0.027130494 | 8.38E-06 | 5704  | family.FamilyXIII.id.1957         |
| 416 | rs1887048   | A | G | 0.057997854  | 0.012960206 | 9.65E-06 | 16717 | family.FamilyXIII.id.1957         |
| 417 | rs12904405  | G | A | -0.085189628 | 0.019268843 | 7.67E-06 | 16643 | family.FamilyXIII.id.1957         |
| 418 | rs9929145   | A | G | -0.125721183 | 0.024523339 | 2.84E-07 | 15866 | family.Lachnospiraceae.id.1987    |
| 419 | rs11755180  | G | C | -0.04922703  | 0.010489407 | 2.69E-06 | 18333 | family.Lachnospiraceae.id.1987    |
| 420 | rs35524804  | C | T | -0.060748124 | 0.012521578 | 2.45E-06 | 17859 | family.Lachnospiraceae.id.1987    |
| 421 | rs11979110  | C | T | -0.050092357 | 0.010506859 | 1.82E-06 | 18339 | family.Lachnospiraceae.id.1987    |
| 422 | rs79086868  | C | T | 0.077672344  | 0.016447234 | 3.01E-06 | 17522 | family.Lachnospiraceae.id.1987    |
| 423 | rs112040820 | G | A | 0.054958365  | 0.011708564 | 2.42E-06 | 17512 | family.Lachnospiraceae.id.1987    |
| 424 | rs2159863   | G | A | -0.058583102 | 0.012874212 | 3.70E-06 | 18340 | family.Lachnospiraceae.id.1987    |
| 425 | rs11139361  | C | T | 0.049446281  | 0.011050331 | 4.26E-06 | 18333 | family.Lachnospiraceae.id.1987    |
| 426 | rs1205443   | G | A | 0.0501415    | 0.011215719 | 7.29E-06 | 17779 | family.Lachnospiraceae.id.1987    |
| 427 | rs7359994   | C | T | -0.050314217 | 0.01124817  | 5.36E-06 | 18340 | family.Lachnospiraceae.id.1987    |
| 428 | rs146660815 | C | T | -0.215113896 | 0.047677775 | 6.53E-06 | 4112  | family.Lachnospiraceae.id.1987    |
| 429 | rs959845    | T | C | -0.049366584 | 0.010780126 | 5.17E-06 | 17859 | family.Lachnospiraceae.id.1987    |
| 430 | rs10402491  | T | C | 0.066170067  | 0.014850954 | 7.58E-06 | 18334 | family.Lachnospiraceae.id.1987    |
| 431 | rs13005175  | G | A | 0.099348285  | 0.021839504 | 8.37E-06 | 16893 | family.Lachnospiraceae.id.1987    |
| 432 | rs2910921   | C | T | 0.160302066  | 0.035832011 | 8.42E-06 | 6549  | family.Lachnospiraceae.id.1987    |
| 433 | rs12760724  | C | A | -0.048456589 | 0.010793397 | 7.27E-06 | 18340 | family.Lachnospiraceae.id.1987    |
| 434 | rs3127230   | T | C | -0.050353667 | 0.011220058 | 6.20E-06 | 18340 | family.Lachnospiraceae.id.1987    |
| 435 | rs11841382  | T | G | -0.071812797 | 0.017461974 | 9.58E-06 | 18340 | family.Lachnospiraceae.id.1987    |
| 436 | rs16861661  | A | G | -0.193287418 | 0.037929323 | 2.70E-07 | 5385  | family.Lactobacillaceae.id.1836   |
| 437 | rs921925    | C | A | 0.0999419    | 0.020168726 | 5.77E-07 | 7053  | family.Lactobacillaceae.id.1836   |
| 438 | rs768253    | G | T | -0.079234443 | 0.017060426 | 3.61E-06 | 7059  | family.Lactobacillaceae.id.1836   |
| 439 | rs6092149   | T | A | -0.082564564 | 0.017028222 | 1.38E-06 | 7006  | family.Lactobacillaceae.id.1836   |
| 440 | rs328312    | A | T | 0.082529013  | 0.016822496 | 8.69E-07 | 7051  | family.Lactobacillaceae.id.1836   |
| 441 | rs11674854  | T | C | -0.083022375 | 0.017526743 | 2.60E-06 | 6750  | family.Lactobacillaceae.id.1836   |
| 442 | rs77478751  | G | A | -0.219177718 | 0.047356625 | 5.96E-06 | 3704  | family.Lactobacillaceae.id.1836   |
| 443 | rs74599091  | G | A | 0.191612904  | 0.042503931 | 7.70E-06 | 4951  | family.Lactobacillaceae.id.1836   |
| 444 | rs9345899   | G | A | -0.12404185  | 0.027894638 | 9.45E-06 | 6602  | family.Lactobacillaceae.id.1836   |
| 445 | rs1590596   | G | C | -0.103810248 | 0.022013537 | 3.90E-06 | 6750  | family.Lactobacillaceae.id.1836   |
| 446 | rs62314653  | A | C | 0.177081987  | 0.039226901 | 6.59E-06 | 6016  | family.Lactobacillaceae.id.1836   |
| 447 | rs73457410  | G | A | 0.215339755  | 0.04366952  | 1.41E-06 | 3498  | family.Methanobacteriaceae.id.121 |
| 448 | rs6776814   | C | T | -0.199565931 | 0.04118249  | 1.63E-06 | 3385  | family.Methanobacteriaceae.id.121 |
| 449 | rs894996    | A | C | 0.216999069  | 0.044907554 | 1.88E-06 | 3582  | family.Methanobacteriaceae.id.121 |
| 450 | rs75208022  | T | C | -0.227244713 | 0.048763001 | 5.92E-06 | 3203  | family.Methanobacteriaceae.id.121 |
| 451 | rs12825290  | G | C | -0.216781075 | 0.049349641 | 6.08E-06 | 3144  | family.Methanobacteriaceae.id.121 |
| 452 | rs56131665  | A | G | 0.178661188  | 0.039297982 | 6.18E-06 | 3572  | family.Methanobacteriaceae.id.121 |
| 453 | rs4257531   | A | G | 0.164498365  | 0.03649593  | 7.44E-06 | 3162  | family.Methanobacteriaceae.id.121 |
| 454 | rs6508769   | C | T | 0.15351913   | 0.034451866 | 8.23E-06 | 3319  | family.Methanobacteriaceae.id.121 |
| 455 | rs73068003  | T | G | -0.158140381 | 0.035180317 | 8.45E-06 | 3692  | family.Methanobacteriaceae.id.121 |
| 456 | rs10424197  | A | G | -0.111274175 | 0.024751678 | 9.28E-06 | 3698  | family.Methanobacteriaceae.id.121 |
| 457 | rs4428215   | A | G | 0.125609687  | 0.023005262 | 4.88E-08 | 5167  | family.Oxalobacteraceae.id.2966   |
| 458 | rs1569853   | C | T | -0.140042787 | 0.028170393 | 7.45E-07 | 4997  | family.Oxalobacteraceae.id.2966   |
| 459 | rs736744    | T | C | 0.105641925  | 0.020064781 | 1.49E-07 | 5167  | family.Oxalobacteraceae.id.2966   |

|     | A           | B | C | D            | E           | F        | G     | H                                    |
|-----|-------------|---|---|--------------|-------------|----------|-------|--------------------------------------|
| 460 | rs6000536   | T | C | -0.118382797 | 0.024135485 | 7.39E-07 | 5166  | family.Oxalobacteraceae.id.2966      |
| 461 | rs36057338  | T | G | 0.181604096  | 0.03987425  | 6.26E-06 | 4738  | family.Oxalobacteraceae.id.2966      |
| 462 | rs7993559   | A | C | 0.092105903  | 0.020111361 | 5.04E-06 | 4989  | family.Oxalobacteraceae.id.2966      |
| 463 | rs12002250  | C | A | 0.196145295  | 0.044523026 | 5.53E-06 | 4726  | family.Oxalobacteraceae.id.2966      |
| 464 | rs111966731 | C | T | 0.204031062  | 0.044574616 | 4.56E-06 | 4387  | family.Oxalobacteraceae.id.2966      |
| 465 | rs17138946  | T | G | -0.1894439   | 0.043024819 | 8.09E-06 | 4776  | family.Oxalobacteraceae.id.2966      |
| 466 | rs11246212  | C | T | 0.136070377  | 0.029179663 | 4.51E-06 | 5130  | family.Oxalobacteraceae.id.2966      |
| 467 | rs934049    | A | G | 0.109751235  | 0.023863562 | 4.21E-06 | 4951  | family.Oxalobacteraceae.id.2966      |
| 468 | rs12509763  | G | C | -0.163319668 | 0.036082292 | 8.05E-06 | 5129  | family.Oxalobacteraceae.id.2966      |
| 469 | rs561239    | G | A | 0.10552502   | 0.023676874 | 7.19E-06 | 4989  | family.Oxalobacteraceae.id.2966      |
| 470 | rs62435498  | A | C | 0.181521209  | 0.040060813 | 7.46E-06 | 4780  | family.Oxalobacteraceae.id.2966      |
| 471 | rs80330081  | C | A | -0.187559843 | 0.042368782 | 6.64E-06 | 4672  | family.Oxalobacteraceae.id.2966      |
| 472 | rs12191680  | G | C | 0.102213615  | 0.019718945 | 3.05E-07 | 9408  | family.Pasteurellaceae.id.3689       |
| 473 | rs9382510   | T | C | -0.088186524 | 0.016996482 | 2.48E-07 | 9410  | family.Pasteurellaceae.id.3689       |
| 474 | rs10840326  | G | C | -0.0717634   | 0.01492293  | 1.44E-06 | 9154  | family.Pasteurellaceae.id.3689       |
| 475 | rs76022354  | T | C | 0.242889667  | 0.050040603 | 1.83E-06 | 3692  | family.Pasteurellaceae.id.3689       |
| 476 | rs72756943  | A | G | 0.139879974  | 0.030302876 | 3.35E-06 | 8020  | family.Pasteurellaceae.id.3689       |
| 477 | rs78909003  | C | T | -0.241159469 | 0.049837229 | 2.05E-06 | 3638  | family.Pasteurellaceae.id.3689       |
| 478 | rs6092684   | T | A | 0.068464719  | 0.014673987 | 3.44E-06 | 9366  | family.Pasteurellaceae.id.3689       |
| 479 | rs4822728   | C | T | 0.068547871  | 0.014903232 | 4.72E-06 | 9412  | family.Pasteurellaceae.id.3689       |
| 480 | rs35510     | G | A | 0.122729003  | 0.026495751 | 4.02E-06 | 8671  | family.Pasteurellaceae.id.3689       |
| 481 | rs10965428  | A | C | -0.119902083 | 0.025821904 | 4.29E-06 | 8873  | family.Pasteurellaceae.id.3689       |
| 482 | rs16970009  | G | A | 0.187381473  | 0.042957182 | 7.32E-06 | 4703  | family.Pasteurellaceae.id.3689       |
| 483 | rs12050685  | G | A | -0.067094787 | 0.015238983 | 9.19E-06 | 9411  | family.Pasteurellaceae.id.3689       |
| 484 | rs73139353  | C | A | -0.222572658 | 0.048463428 | 8.71E-06 | 4047  | family.Pasteurellaceae.id.3689       |
| 485 | rs6972479   | G | A | -0.078186189 | 0.01753656  | 7.75E-06 | 8616  | family.Pasteurellaceae.id.3689       |
| 486 | rs9895850   | C | T | -0.176406461 | 0.041016971 | 9.08E-06 | 4737  | family.Pasteurellaceae.id.3689       |
| 487 | rs111582866 | A | G | -0.113957275 | 0.025640298 | 7.07E-06 | 8616  | family.Pasteurellaceae.id.3689       |
| 488 | rs62568866  | A | T | -0.118018253 | 0.025920615 | 7.23E-06 | 8020  | family.Pasteurellaceae.id.3689       |
| 489 | rs731534    | G | C | -0.098650225 | 0.021631635 | 9.46E-06 | 9115  | family.Pasteurellaceae.id.3689       |
| 490 | rs9938097   | C | T | -0.071038642 | 0.015802434 | 8.23E-06 | 9402  | family.Pasteurellaceae.id.3689       |
| 491 | rs35703006  | T | G | 0.081265478  | 0.016435533 | 4.95E-07 | 10715 | family.Peptococcaceae.id.2024        |
| 492 | rs4990837   | G | A | 0.091038704  | 0.018586948 | 1.74E-06 | 10718 | family.Peptococcaceae.id.2024        |
| 493 | rs150600492 | C | A | 0.135773843  | 0.028975651 | 2.31E-06 | 9761  | family.Peptococcaceae.id.2024        |
| 494 | rs12634826  | G | T | -0.073988509 | 0.015093124 | 1.01E-06 | 10381 | family.Peptococcaceae.id.2024        |
| 495 | rs12992764  | G | T | 0.068421261  | 0.014113692 | 1.46E-06 | 10444 | family.Peptococcaceae.id.2024        |
| 496 | rs75898026  | G | A | -0.082177853 | 0.017354142 | 2.02E-06 | 10444 | family.Peptococcaceae.id.2024        |
| 497 | rs117452796 | G | A | -0.257982233 | 0.054956896 | 3.15E-06 | 3161  | family.Peptococcaceae.id.2024        |
| 498 | rs75430375  | T | C | -0.147940821 | 0.031749824 | 3.41E-06 | 8375  | family.Peptococcaceae.id.2024        |
| 499 | rs12144792  | T | C | 0.064399031  | 0.014124573 | 5.82E-06 | 10718 | family.Peptococcaceae.id.2024        |
| 500 | rs61841503  | A | G | 0.091965839  | 0.016133103 | 9.80E-09 | 15333 | family.Peptostreptococcaceae.id.2042 |
| 501 | rs4692811   | T | C | 0.064207491  | 0.012691273 | 4.21E-07 | 16061 | family.Peptostreptococcaceae.id.2042 |
| 502 | rs12377846  | A | C | -0.252000426 | 0.051162723 | 7.26E-07 | 3736  | family.Peptostreptococcaceae.id.2042 |
| 503 | rs2644627   | G | C | -0.055850562 | 0.011224002 | 6.33E-07 | 16059 | family.Peptostreptococcaceae.id.2042 |
| 504 | rs59987323  | T | C | -0.053707832 | 0.011443008 | 2.70E-06 | 15584 | family.Peptostreptococcaceae.id.2042 |
| 505 | rs9573937   | G | A | -0.069363688 | 0.01429074  | 1.71E-06 | 16061 | family.Peptostreptococcaceae.id.2042 |
| 506 | rs75819860  | A | T | 0.126263781  | 0.026838281 | 2.49E-06 | 11697 | family.Peptostreptococcaceae.id.2042 |
| 507 | rs117020988 | T | C | 0.182411122  | 0.037212625 | 1.03E-06 | 6831  | family.Peptostreptococcaceae.id.2042 |
| 508 | rs1520207   | T | C | 0.052565835  | 0.011247608 | 3.17E-06 | 16057 | family.Peptostreptococcaceae.id.2042 |
| 509 | rs76982728  | C | T | 0.124202832  | 0.026692325 | 3.24E-06 | 11185 | family.Peptostreptococcaceae.id.2042 |
| 510 | rs12986312  | G | T | 0.057181848  | 0.01259472  | 5.77E-06 | 15970 | family.Peptostreptococcaceae.id.2042 |

|     | A           | B | C | D            | E           | F        | G     | H                                    |
|-----|-------------|---|---|--------------|-------------|----------|-------|--------------------------------------|
| 511 | rs10805326  | A | G | 0.0566637    | 0.012275984 | 4.03E-06 | 16061 | family.Peptostreptococcaceae.id.2042 |
| 512 | rs1467258   | A | G | 0.072583976  | 0.016232118 | 7.90E-06 | 15584 | family.Peptostreptococcaceae.id.2042 |
| 513 | rs59865771  | T | C | -0.057376395 | 0.012719207 | 7.69E-06 | 16040 | family.Peptostreptococcaceae.id.2042 |
| 514 | rs77540684  | G | T | 0.106725055  | 0.024563751 | 8.14E-06 | 13495 | family.Peptostreptococcaceae.id.2042 |
| 515 | rs6721459   | G | A | 0.050982344  | 0.011197512 | 5.08E-06 | 16061 | family.Peptostreptococcaceae.id.2042 |
| 516 | rs10119172  | G | C | -0.073732406 | 0.014258993 | 1.32E-07 | 18022 | family.Porphyromonadaceae.id.943     |
| 517 | rs17065783  | G | A | -0.059132994 | 0.012223515 | 1.79E-06 | 18028 | family.Porphyromonadaceae.id.943     |
| 518 | rs6953849   | G | A | 0.071814891  | 0.015072427 | 2.44E-06 | 18028 | family.Porphyromonadaceae.id.943     |
| 519 | rs10858364  | T | G | 0.055315986  | 0.012084992 | 4.31E-06 | 18028 | family.Porphyromonadaceae.id.943     |
| 520 | rs3111851   | G | C | 0.058189615  | 0.012114715 | 2.19E-06 | 18024 | family.Porphyromonadaceae.id.943     |
| 521 | rs7330827   | C | T | -0.103841997 | 0.023735535 | 8.05E-06 | 13754 | family.Porphyromonadaceae.id.943     |
| 522 | rs35961441  | C | A | 0.091525669  | 0.020730567 | 8.37E-06 | 16374 | family.Porphyromonadaceae.id.943     |
| 523 | rs10762312  | A | G | -0.052368014 | 0.011881432 | 8.70E-06 | 18028 | family.Porphyromonadaceae.id.943     |
| 524 | rs35233670  | C | T | -0.047357561 | 0.010601956 | 7.91E-06 | 18024 | family.Porphyromonadaceae.id.943     |
| 525 | rs864093    | C | A | -0.052793912 | 0.011749938 | 9.60E-06 | 18027 | family.Porphyromonadaceae.id.943     |
| 526 | rs1980561   | G | A | -0.048528896 | 0.010928377 | 8.95E-06 | 18028 | family.Porphyromonadaceae.id.943     |
| 527 | rs9958960   | A | G | -0.091480658 | 0.01736113  | 1.06E-07 | 14061 | family.Prevotellaceae.id.960         |
| 528 | rs4493272   | C | T | -0.060499212 | 0.011802729 | 3.02E-07 | 14867 | family.Prevotellaceae.id.960         |
| 529 | rs3860225   | G | A | 0.083936026  | 0.016793605 | 5.50E-07 | 14871 | family.Prevotellaceae.id.960         |
| 530 | rs912860    | A | G | -0.229046147 | 0.048312418 | 9.30E-07 | 3479  | family.Prevotellaceae.id.960         |
| 531 | rs12118202  | C | T | -0.075198589 | 0.014726515 | 5.54E-07 | 14869 | family.Prevotellaceae.id.960         |
| 532 | rs2206482   | G | T | -0.056910511 | 0.011748649 | 1.30E-06 | 14808 | family.Prevotellaceae.id.960         |
| 533 | rs9586501   | A | G | 0.059268113  | 0.012732933 | 2.59E-06 | 14868 | family.Prevotellaceae.id.960         |
| 534 | rs12057990  | T | C | 0.058987846  | 0.013226834 | 8.97E-06 | 14867 | family.Prevotellaceae.id.960         |
| 535 | rs148376875 | G | T | 0.08451502   | 0.017916322 | 2.08E-06 | 14289 | family.Prevotellaceae.id.960         |
| 536 | rs4685827   | C | T | -0.0679529   | 0.014540716 | 2.77E-06 | 14867 | family.Prevotellaceae.id.960         |
| 537 | rs10131942  | G | C | 0.070121224  | 0.015832621 | 8.61E-06 | 14871 | family.Prevotellaceae.id.960         |
| 538 | rs34660375  | G | A | -0.080589392 | 0.01782913  | 7.40E-06 | 14289 | family.Prevotellaceae.id.960         |
| 539 | rs7252711   | G | A | -0.074087571 | 0.016192575 | 5.57E-06 | 14540 | family.Prevotellaceae.id.960         |
| 540 | rs3758087   | C | T | 0.056419924  | 0.012465508 | 8.61E-06 | 14871 | family.Prevotellaceae.id.960         |
| 541 | rs34071565  | A | T | -0.156699931 | 0.034788229 | 5.60E-06 | 8136  | family.Prevotellaceae.id.960         |
| 542 | rs13069367  | C | A | -0.053976797 | 0.011968733 | 7.39E-06 | 14860 | family.Prevotellaceae.id.960         |
| 543 | rs7975087   | A | C | -0.060144779 | 0.013545406 | 7.59E-06 | 14871 | family.Prevotellaceae.id.960         |
| 544 | rs2278540   | A | G | 0.055424915  | 0.012326469 | 8.44E-06 | 14847 | family.Prevotellaceae.id.960         |
| 545 | rs9813022   | G | A | -0.08424439  | 0.016358324 | 2.53E-07 | 8498  | family.Rhodospirillaceae.id.2717     |
| 546 | rs3754624   | T | C | 0.09713892   | 0.020006404 | 1.71E-06 | 8496  | family.Rhodospirillaceae.id.2717     |
| 547 | rs55876211  | T | C | -0.091185056 | 0.019639521 | 2.87E-06 | 8494  | family.Rhodospirillaceae.id.2717     |
| 548 | rs76784716  | G | A | 0.136049347  | 0.028576745 | 1.49E-06 | 8498  | family.Rhodospirillaceae.id.2717     |
| 549 | rs4278423   | C | T | 0.107529262  | 0.023572494 | 3.12E-06 | 8501  | family.Rhodospirillaceae.id.2717     |
| 550 | rs1549633   | C | A | 0.099931243  | 0.021863395 | 4.70E-06 | 8010  | family.Rhodospirillaceae.id.2717     |
| 551 | rs11591293  | T | G | 0.074318385  | 0.015872409 | 2.67E-06 | 8500  | family.Rhodospirillaceae.id.2717     |
| 552 | rs74354280  | T | C | -0.091189567 | 0.02049069  | 6.67E-06 | 8501  | family.Rhodospirillaceae.id.2717     |
| 553 | rs61933850  | A | G | 0.164808335  | 0.036064663 | 7.23E-06 | 6830  | family.Rhodospirillaceae.id.2717     |
| 554 | rs7001029   | T | C | 0.117365754  | 0.026132422 | 5.35E-06 | 8044  | family.Rhodospirillaceae.id.2717     |
| 555 | rs1035406   | A | G | -0.113540052 | 0.025086266 | 5.84E-06 | 8483  | family.Rhodospirillaceae.id.2717     |
| 556 | rs72714493  | G | A | 0.08168583   | 0.018079132 | 7.35E-06 | 8497  | family.Rhodospirillaceae.id.2717     |
| 557 | rs12977163  | C | G | 0.07309515   | 0.016349062 | 7.63E-06 | 8044  | family.Rhodospirillaceae.id.2717     |
| 558 | rs13336560  | T | C | -0.070171864 | 0.01580613  | 9.17E-06 | 8010  | family.Rhodospirillaceae.id.2717     |
| 559 | rs4822789   | C | G | 0.073432075  | 0.01605212  | 7.01E-06 | 8492  | family.Rhodospirillaceae.id.2717     |
| 560 | rs6679026   | C | T | 0.111983836  | 0.025108815 | 9.95E-06 | 8497  | family.Rhodospirillaceae.id.2717     |
| 561 | rs1923415   | G | A | -0.099923761 | 0.022732585 | 9.64E-06 | 8501  | family.Rhodospirillaceae.id.2717     |

|     | A          | B | C | D            | E           | F        | G     | H                               |
|-----|------------|---|---|--------------|-------------|----------|-------|---------------------------------|
| 562 | rs9603208  | T | G | 0.082117307  | 0.015959564 | 1.92E-07 | 17680 | family.Rikenellaceae.id.967     |
| 563 | rs1939881  | A | G | -0.105589494 | 0.020621272 | 5.64E-07 | 17434 | family.Rikenellaceae.id.967     |
| 564 | rs67705352 | G | T | -0.054968793 | 0.01105338  | 6.58E-07 | 17676 | family.Rikenellaceae.id.967     |
| 565 | rs4264350  | C | T | -0.052639287 | 0.010855489 | 1.35E-06 | 17668 | family.Rikenellaceae.id.967     |
| 566 | rs62532512 | A | C | -0.050425666 | 0.010739924 | 2.76E-06 | 17672 | family.Rikenellaceae.id.967     |
| 567 | rs67281112 | C | G | 0.063581352  | 0.013745123 | 3.63E-06 | 17199 | family.Rikenellaceae.id.967     |
| 568 | rs6837275  | G | A | 0.057035488  | 0.011886994 | 1.45E-06 | 17199 | family.Rikenellaceae.id.967     |
| 569 | rs9578457  | A | G | -0.141478496 | 0.031584793 | 3.99E-06 | 9400  | family.Rikenellaceae.id.967     |
| 570 | rs2833282  | A | G | 0.071113715  | 0.015696614 | 4.31E-06 | 17680 | family.Rikenellaceae.id.967     |
| 571 | rs77885767 | T | C | -0.156209293 | 0.033648181 | 2.85E-06 | 8478  | family.Rikenellaceae.id.967     |
| 572 | rs59663348 | A | G | 0.057091499  | 0.012504754 | 6.12E-06 | 17678 | family.Rikenellaceae.id.967     |
| 573 | rs74474130 | G | T | 0.137747171  | 0.029568753 | 3.61E-06 | 11055 | family.Rikenellaceae.id.967     |
| 574 | rs7242694  | T | C | -0.061867432 | 0.013488231 | 5.81E-06 | 17199 | family.Rikenellaceae.id.967     |
| 575 | rs36021379 | G | A | -0.065600501 | 0.014490275 | 7.20E-06 | 17199 | family.Rikenellaceae.id.967     |
| 576 | rs10217435 | T | C | -0.088375611 | 0.019750648 | 6.51E-06 | 17679 | family.Rikenellaceae.id.967     |
| 577 | rs2447496  | A | G | -0.054920309 | 0.012190433 | 6.09E-06 | 17199 | family.Rikenellaceae.id.967     |
| 578 | rs35909684 | C | A | -0.0850181   | 0.01915389  | 7.10E-06 | 17565 | family.Rikenellaceae.id.967     |
| 579 | rs4783173  | G | C | 0.048151437  | 0.011000589 | 7.06E-06 | 17086 | family.Rikenellaceae.id.967     |
| 580 | rs10832801 | C | A | -0.053476324 | 0.012266628 | 7.50E-06 | 17199 | family.Rikenellaceae.id.967     |
| 581 | rs9389714  | T | C | -0.063684112 | 0.014341562 | 8.79E-06 | 17680 | family.Rikenellaceae.id.967     |
| 582 | rs6744030  | T | C | 0.069674656  | 0.015710296 | 9.32E-06 | 17564 | family.Rikenellaceae.id.967     |
| 583 | rs55793120 | C | T | 0.138220105  | 0.02661521  | 1.44E-07 | 12405 | family.Ruminococcaceae.id.2050  |
| 584 | rs2113833  | C | T | 0.169146233  | 0.035500935 | 1.14E-06 | 4140  | family.Ruminococcaceae.id.2050  |
| 585 | rs17376049 | C | T | 0.084853361  | 0.017211379 | 7.30E-07 | 18333 | family.Ruminococcaceae.id.2050  |
| 586 | rs56199908 | C | T | -0.199326846 | 0.041044434 | 1.66E-06 | 5618  | family.Ruminococcaceae.id.2050  |
| 587 | rs10093275 | T | C | 0.053459485  | 0.011676961 | 5.35E-06 | 18335 | family.Ruminococcaceae.id.2050  |
| 588 | rs76724913 | G | T | 0.090105292  | 0.020310437 | 9.60E-06 | 17516 | family.Ruminococcaceae.id.2050  |
| 589 | rs1612733  | C | T | 0.108708367  | 0.023800599 | 4.22E-06 | 15016 | family.Ruminococcaceae.id.2050  |
| 590 | rs2426816  | A | T | -0.048015186 | 0.010601121 | 6.04E-06 | 17774 | family.Ruminococcaceae.id.2050  |
| 591 | rs3009418  | A | C | 0.092760682  | 0.021012315 | 8.69E-06 | 16407 | family.Ruminococcaceae.id.2050  |
| 592 | rs10166469 | C | T | -0.053336034 | 0.012020913 | 8.52E-06 | 18314 | family.Ruminococcaceae.id.2050  |
| 593 | rs1158100  | G | A | -0.049053898 | 0.010986476 | 8.61E-06 | 18333 | family.Ruminococcaceae.id.2050  |
| 594 | rs499272   | C | G | 0.070643126  | 0.016045997 | 9.29E-06 | 17854 | family.Ruminococcaceae.id.2050  |
| 595 | rs11110281 | C | T | -0.130554059 | 0.022594298 | 1.40E-08 | 15316 | family.Streptococcaceae.id.1850 |
| 596 | rs4968759  | G | A | -0.054403465 | 0.011127118 | 8.92E-07 | 16624 | family.Streptococcaceae.id.1850 |
| 597 | rs395407   | C | G | -0.082685467 | 0.017253602 | 1.33E-06 | 16088 | family.Streptococcaceae.id.1850 |
| 598 | rs35344081 | A | G | 0.06093492   | 0.012970335 | 2.64E-06 | 16624 | family.Streptococcaceae.id.1850 |
| 599 | rs2370083  | T | G | -0.084275076 | 0.018450934 | 4.26E-06 | 16516 | family.Streptococcaceae.id.1850 |
| 600 | rs76717940 | A | T | 0.150605742  | 0.033407945 | 3.09E-06 | 7720  | family.Streptococcaceae.id.1850 |
| 601 | rs10028567 | T | C | -0.093402667 | 0.019034346 | 3.72E-06 | 16549 | family.Streptococcaceae.id.1850 |
| 602 | rs72739637 | G | A | 0.092798286  | 0.019202095 | 1.82E-06 | 15111 | family.Streptococcaceae.id.1850 |
| 603 | rs16950051 | G | A | 0.107007503  | 0.023697285 | 5.34E-06 | 14431 | family.Streptococcaceae.id.1850 |
| 604 | rs77968078 | A | G | -0.099301329 | 0.022478765 | 7.93E-06 | 15519 | family.Streptococcaceae.id.1850 |
| 605 | rs7916711  | G | A | 0.095963939  | 0.021545035 | 6.33E-06 | 15515 | family.Streptococcaceae.id.1850 |
| 606 | rs957755   | G | T | -0.064244942 | 0.014270246 | 7.42E-06 | 16627 | family.Streptococcaceae.id.1850 |
| 607 | rs6806351  | C | T | -0.061920915 | 0.013574394 | 6.94E-06 | 16198 | family.Streptococcaceae.id.1850 |
| 608 | rs9903102  | A | C | -0.069301513 | 0.015409626 | 4.92E-06 | 16623 | family.Streptococcaceae.id.1850 |
| 609 | rs57646748 | A | G | -0.088020977 | 0.019875957 | 7.88E-06 | 16160 | family.Streptococcaceae.id.1850 |
| 610 | rs6563952  | C | G | 0.080193069  | 0.017857592 | 8.71E-06 | 16627 | family.Streptococcaceae.id.1850 |
| 611 | rs12741784 | T | C | -0.062145234 | 0.011926612 | 1.28E-07 | 15867 | family.Veillonellaceae.id.2172  |
| 612 | rs79535861 | C | A | 0.100666153  | 0.020701553 | 1.58E-06 | 15061 | family.Veillonellaceae.id.2172  |

|     | A           | B | C | D            | E           | F        | G     | H                                        |
|-----|-------------|---|---|--------------|-------------|----------|-------|------------------------------------------|
| 613 | rs111810795 | T | C | -0.08671084  | 0.018057347 | 1.73E-06 | 15605 | family.Veillonellaceae.id.2172           |
| 614 | rs12186441  | A | G | 0.208095725  | 0.045399862 | 4.53E-06 | 5236  | family.Veillonellaceae.id.2172           |
| 615 | rs4797169   | C | T | 0.058779888  | 0.012829669 | 4.49E-06 | 15974 | family.Veillonellaceae.id.2172           |
| 616 | rs12668619  | G | A | 0.055300975  | 0.011765373 | 2.57E-06 | 15971 | family.Veillonellaceae.id.2172           |
| 617 | rs2175069   | G | A | -0.052675165 | 0.01148863  | 4.64E-06 | 15976 | family.Veillonellaceae.id.2172           |
| 618 | rs1442060   | A | G | -0.051402432 | 0.011212452 | 4.51E-06 | 15976 | family.Veillonellaceae.id.2172           |
| 619 | rs1447205   | C | G | -0.052068875 | 0.011565567 | 7.35E-06 | 15971 | family.Veillonellaceae.id.2172           |
| 620 | rs114889439 | G | A | -0.253809201 | 0.053916917 | 6.19E-06 | 3268  | family.Veillonellaceae.id.2172           |
| 621 | rs4461038   | G | A | -0.055496494 | 0.011946736 | 3.73E-06 | 15973 | family.Veillonellaceae.id.2172           |
| 622 | rs6909981   | T | C | -0.063869651 | 0.014176514 | 5.48E-06 | 15976 | family.Veillonellaceae.id.2172           |
| 623 | rs2561116   | G | T | -0.083616969 | 0.018715906 | 7.89E-06 | 15976 | family.Veillonellaceae.id.2172           |
| 624 | rs61264131  | C | A | 0.202366989  | 0.046438799 | 6.75E-06 | 3075  | family.Veillonellaceae.id.2172           |
| 625 | rs9345168   | A | C | 0.050910225  | 0.011325295 | 8.49E-06 | 15976 | family.Veillonellaceae.id.2172           |
| 626 | rs11700976  | A | C | 0.050333676  | 0.01137631  | 9.25E-06 | 15971 | family.Veillonellaceae.id.2172           |
| 627 | rs6692542   | G | A | 0.053439722  | 0.011825371 | 8.68E-06 | 15976 | family.Veillonellaceae.id.2172           |
| 628 | rs2585520   | T | G | -0.090497192 | 0.020042803 | 5.27E-06 | 15501 | family.Veillonellaceae.id.2172           |
| 629 | rs75768969  | G | C | -0.070377296 | 0.015685477 | 7.19E-06 | 15975 | family.Veillonellaceae.id.2172           |
| 630 | rs1693340   | C | T | 0.081893428  | 0.018245018 | 9.25E-06 | 15058 | family.Veillonellaceae.id.2172           |
| 631 | rs4263802   | A | G | 0.050941954  | 0.011492112 | 7.45E-06 | 15976 | family.Veillonellaceae.id.2172           |
| 632 | rs11729256  | C | T | 0.074979802  | 0.015017677 | 6.73E-07 | 11861 | family.Verrucomicrobiaceae.id.4036       |
| 633 | rs4936098   | G | A | 0.0648691    | 0.013592808 | 1.13E-06 | 11858 | family.Verrucomicrobiaceae.id.4036       |
| 634 | rs9349825   | G | A | -0.070435405 | 0.014712796 | 2.51E-06 | 11858 | family.Verrucomicrobiaceae.id.4036       |
| 635 | rs74542928  | C | T | 0.112123956  | 0.023642178 | 1.65E-06 | 11216 | family.Verrucomicrobiaceae.id.4036       |
| 636 | rs2602429   | T | C | 0.074551564  | 0.015619484 | 2.70E-06 | 11690 | family.Verrucomicrobiaceae.id.4036       |
| 637 | rs4242783   | A | G | 0.068799208  | 0.01476936  | 2.75E-06 | 11690 | family.Verrucomicrobiaceae.id.4036       |
| 638 | rs11184341  | C | G | 0.065530075  | 0.014223048 | 4.14E-06 | 11864 | family.Verrucomicrobiaceae.id.4036       |
| 639 | rs61779207  | A | G | -0.075881119 | 0.01677619  | 6.63E-06 | 11591 | family.Verrucomicrobiaceae.id.4036       |
| 640 | rs117107102 | G | A | 0.20468288   | 0.043157251 | 2.92E-06 | 4975  | family.Verrucomicrobiaceae.id.4036       |
| 641 | rs12908520  | A | G | 0.061910394  | 0.013094609 | 2.15E-06 | 11863 | family.Verrucomicrobiaceae.id.4036       |
| 642 | rs111862613 | C | T | 0.090706497  | 0.01967463  | 3.73E-06 | 11621 | family.Verrucomicrobiaceae.id.4036       |
| 643 | rs941682    | A | G | -0.06315257  | 0.014376725 | 9.58E-06 | 11809 | family.Verrucomicrobiaceae.id.4036       |
| 644 | rs4396289   | T | C | -0.152917575 | 0.028852532 | 1.54E-07 | 3913  | family.Victivallaceae.id.2255            |
| 645 | rs2944282   | C | T | -0.124196623 | 0.025702577 | 1.57E-06 | 3555  | family.Victivallaceae.id.2255            |
| 646 | rs11764871  | T | G | 0.12709902   | 0.025655983 | 7.49E-07 | 3909  | family.Victivallaceae.id.2255            |
| 647 | rs6545794   | G | A | -0.19778562  | 0.041049541 | 5.97E-07 | 3916  | family.Victivallaceae.id.2255            |
| 648 | rs2546105   | T | A | 0.126643495  | 0.025711059 | 1.03E-06 | 3917  | family.Victivallaceae.id.2255            |
| 649 | rs62570196  | T | C | -0.246101492 | 0.048307716 | 2.70E-07 | 3091  | family.Victivallaceae.id.2255            |
| 650 | rs7077363   | A | G | 0.14894216   | 0.031836622 | 2.83E-06 | 3912  | family.Victivallaceae.id.2255            |
| 651 | rs67832247  | T | C | -0.123489124 | 0.026669507 | 3.24E-06 | 3555  | family.Victivallaceae.id.2255            |
| 652 | rs34962571  | C | A | -0.186945459 | 0.04184118  | 6.25E-06 | 3237  | family.Victivallaceae.id.2255            |
| 653 | rs7860510   | C | G | 0.164855226  | 0.037512763 | 9.60E-06 | 3912  | family.Victivallaceae.id.2255            |
| 654 | rs7627405   | T | C | -0.134158069 | 0.030142747 | 8.19E-06 | 3555  | family.Victivallaceae.id.2255            |
| 655 | rs61702987  | C | T | 0.145501293  | 0.030000733 | 3.08E-06 | 3906  | family.Victivallaceae.id.2255            |
| 656 | rs7314815   | A | G | 0.101087856  | 0.02255936  | 6.40E-06 | 3912  | family.Victivallaceae.id.2255            |
| 657 | rs11671100  | C | A | -0.160034432 | 0.034947236 | 4.08E-06 | 3331  | family.Victivallaceae.id.2255            |
| 658 | rs6890185   | C | T | 0.113423668  | 0.023313729 | 1.12E-06 | 4166  | genus..Clostridiuminnocuumgroup.id.14397 |
| 659 | rs61267978  | C | T | 0.14707953   | 0.032087502 | 5.59E-06 | 4165  | genus..Clostridiuminnocuumgroup.id.14397 |
| 660 | rs1948423   | A | T | -0.108859115 | 0.023424976 | 3.49E-06 | 4165  | genus..Clostridiuminnocuumgroup.id.14397 |
| 661 | rs6577484   | A | G | 0.16042475   | 0.036085736 | 8.41E-06 | 3858  | genus..Clostridiuminnocuumgroup.id.14397 |
| 662 | rs10074000  | C | T | -0.102648064 | 0.022750829 | 7.00E-06 | 4048  | genus..Clostridiuminnocuumgroup.id.14397 |
| 663 | rs1942371   | A | G | -0.15793795  | 0.034186957 | 4.06E-06 | 3971  | genus..Clostridiuminnocuumgroup.id.14397 |

|     | A           | B | C | D            | E           | F        | G     | H                                                 |
|-----|-------------|---|---|--------------|-------------|----------|-------|---------------------------------------------------|
| 664 | rs40656     | T | C | 0.142664382  | 0.031102116 | 8.62E-06 | 4048  | genus..Clostridiuminnocuumgroup.id.14397          |
| 665 | rs71564433  | A | T | -0.126745947 | 0.027465666 | 7.80E-06 | 4164  | genus..Clostridiuminnocuumgroup.id.14397          |
| 666 | rs77845139  | G | A | -0.11499293  | 0.02571863  | 8.41E-06 | 4048  | genus..Clostridiuminnocuumgroup.id.14397          |
| 667 | rs10506058  | G | A | 0.099704805  | 0.022192573 | 8.92E-06 | 4163  | genus..Clostridiuminnocuumgroup.id.14397          |
| 668 | rs4869133   | A | G | -0.180590537 | 0.040950516 | 7.24E-06 | 3735  | genus..Clostridiuminnocuumgroup.id.14397          |
| 669 | rs112617308 | C | T | -0.170873361 | 0.036284397 | 2.38E-06 | 4001  | genus..Eubacteriumbrachygroup.id.11296            |
| 670 | rs9613196   | A | T | -0.238718472 | 0.052856104 | 4.99E-06 | 3004  | genus..Eubacteriumbrachygroup.id.11296            |
| 671 | rs62348779  | C | T | -0.201480569 | 0.043286015 | 3.78E-06 | 3827  | genus..Eubacteriumbrachygroup.id.11296            |
| 672 | rs2913110   | T | C | 0.105143062  | 0.022941973 | 4.56E-06 | 4001  | genus..Eubacteriumbrachygroup.id.11296            |
| 673 | rs4862235   | A | G | 0.104806298  | 0.022575135 | 3.73E-06 | 4000  | genus..Eubacteriumbrachygroup.id.11296            |
| 674 | rs12151423  | G | A | 0.101328627  | 0.022732445 | 9.27E-06 | 3854  | genus..Eubacteriumbrachygroup.id.11296            |
| 675 | rs73199919  | C | T | -0.236716837 | 0.053133485 | 8.16E-06 | 3008  | genus..Eubacteriumbrachygroup.id.11296            |
| 676 | rs6591893   | A | G | 0.108225435  | 0.024031859 | 7.34E-06 | 3999  | genus..Eubacteriumbrachygroup.id.11296            |
| 677 | rs720439    | G | A | -0.111927002 | 0.025125245 | 7.03E-06 | 4001  | genus..Eubacteriumbrachygroup.id.11296            |
| 678 | rs13139592  | C | T | -0.145996616 | 0.032719209 | 7.97E-06 | 3842  | genus..Eubacteriumbrachygroup.id.11296            |
| 679 | rs1384962   | G | A | 0.120888267  | 0.026626427 | 6.99E-06 | 4001  | genus..Eubacteriumbrachygroup.id.11296            |
| 680 | rs17159861  | T | C | 0.096222758  | 0.016838828 | 1.04E-08 | 17380 | genus..Eubacteriumcoprostanoligenesgroup.id.11375 |
| 681 | rs9648214   | C | T | -0.082871942 | 0.016430987 | 2.52E-07 | 17379 | genus..Eubacteriumcoprostanoligenesgroup.id.11375 |
| 682 | rs115325767 | C | G | 0.078332188  | 0.017471885 | 2.62E-06 | 16555 | genus..Eubacteriumcoprostanoligenesgroup.id.11375 |
| 683 | rs12906958  | T | C | -0.053315925 | 0.011593477 | 4.35E-06 | 17380 | genus..Eubacteriumcoprostanoligenesgroup.id.11375 |
| 684 | rs4076415   | G | T | 0.051515202  | 0.011029435 | 1.99E-06 | 16960 | genus..Eubacteriumcoprostanoligenesgroup.id.11375 |
| 685 | rs6762473   | A | C | 0.052158365  | 0.011235251 | 4.26E-06 | 17377 | genus..Eubacteriumcoprostanoligenesgroup.id.11375 |
| 686 | rs10444197  | G | A | -0.050582278 | 0.011345529 | 5.98E-06 | 17380 | genus..Eubacteriumcoprostanoligenesgroup.id.11375 |
| 687 | rs2644213   | A | G | 0.053884526  | 0.012124458 | 9.86E-06 | 17380 | genus..Eubacteriumcoprostanoligenesgroup.id.11375 |
| 688 | rs11720857  | T | C | 0.063077578  | 0.014448482 | 9.26E-06 | 16960 | genus..Eubacteriumcoprostanoligenesgroup.id.11375 |
| 689 | rs4717831   | T | A | 0.078678267  | 0.017403801 | 9.18E-06 | 16854 | genus..Eubacteriumcoprostanoligenesgroup.id.11375 |
| 690 | rs62024432  | T | C | -0.076969763 | 0.017210135 | 7.50E-06 | 17271 | genus..Eubacteriumcoprostanoligenesgroup.id.11375 |
| 691 | rs76898927  | A | G | 0.12305502   | 0.026637491 | 4.79E-06 | 12197 | genus..Eubacteriumcoprostanoligenesgroup.id.11375 |
| 692 | rs1020520   | G | T | -0.059070472 | 0.013292872 | 8.89E-06 | 17371 | genus..Eubacteriumcoprostanoligenesgroup.id.11375 |
| 693 | rs11052069  | C | T | 0.047783175  | 0.01078333  | 9.38E-06 | 17380 | genus..Eubacteriumcoprostanoligenesgroup.id.11375 |
| 694 | rs79895140  | C | T | -0.06410167  | 0.014115288 | 8.62E-06 | 16139 | genus..Eubacteriumcoprostanoligenesgroup.id.11375 |
| 695 | rs4583233   | C | A | 0.067020477  | 0.012812178 | 2.84E-07 | 14327 | genus..Eubacteriumeligensgroup.id.14372           |
| 696 | rs265534    | G | T | -0.056375608 | 0.01201272  | 2.27E-06 | 14776 | genus..Eubacteriumeligensgroup.id.14372           |
| 697 | rs72839198  | G | C | 0.155658995  | 0.037561222 | 3.14E-06 | 4926  | genus..Eubacteriumeligensgroup.id.14372           |
| 698 | rs74606150  | G | C | -0.196453545 | 0.042564951 | 4.25E-06 | 5381  | genus..Eubacteriumeligensgroup.id.14372           |
| 699 | rs6923695   | G | T | 0.103267603  | 0.02295245  | 4.87E-06 | 12891 | genus..Eubacteriumeligensgroup.id.14372           |
| 700 | rs56080211  | T | C | 0.123092697  | 0.028274315 | 9.14E-06 | 10699 | genus..Eubacteriumeligensgroup.id.14372           |
| 701 | rs158115    | C | G | 0.091527053  | 0.019061087 | 9.74E-06 | 14678 | genus..Eubacteriumeligensgroup.id.14372           |
| 702 | rs2200429   | G | A | -0.088882459 | 0.019847898 | 5.30E-06 | 14761 | genus..Eubacteriumeligensgroup.id.14372           |
| 703 | rs182318    | A | G | -0.082494113 | 0.019561497 | 8.40E-06 | 14777 | genus..Eubacteriumeligensgroup.id.14372           |
| 704 | rs12719051  | G | A | 0.091662637  | 0.020818348 | 7.12E-06 | 12799 | genus..Eubacteriumeligensgroup.id.14372           |
| 705 | rs3771393   | T | C | 0.130842344  | 0.026667104 | 7.38E-07 | 3792  | genus..Eubacteriumfissicatenagroup.id.14373       |
| 706 | rs2733072   | A | G | 0.109644168  | 0.022830587 | 1.49E-06 | 3833  | genus..Eubacteriumfissicatenagroup.id.14373       |
| 707 | rs7104872   | A | G | 0.138611743  | 0.029190553 | 2.73E-06 | 3829  | genus..Eubacteriumfissicatenagroup.id.14373       |
| 708 | rs151257695 | G | A | 0.209509779  | 0.045484723 | 3.10E-06 | 3587  | genus..Eubacteriumfissicatenagroup.id.14373       |
| 709 | rs11876297  | C | T | 0.131469398  | 0.028171203 | 2.67E-06 | 3396  | genus..Eubacteriumfissicatenagroup.id.14373       |
| 710 | rs6934739   | G | A | 0.111463384  | 0.025278805 | 9.75E-06 | 3831  | genus..Eubacteriumfissicatenagroup.id.14373       |
| 711 | rs10147907  | G | T | 0.172262807  | 0.039600983 | 8.27E-06 | 3833  | genus..Eubacteriumfissicatenagroup.id.14373       |
| 712 | rs1768152   | C | T | 0.139488571  | 0.031618584 | 8.70E-06 | 3590  | genus..Eubacteriumfissicatenagroup.id.14373       |
| 713 | rs11818408  | A | G | 0.10585035   | 0.023711404 | 8.20E-06 | 3590  | genus..Eubacteriumfissicatenagroup.id.14373       |
| 714 | rs13116360  | C | T | 0.154124445  | 0.029718533 | 2.94E-07 | 10323 | genus..Eubacteriumhalliigroup.id.11338            |

|     | A           | B | C | D            | E           | F        | G     | H                                             |
|-----|-------------|---|---|--------------|-------------|----------|-------|-----------------------------------------------|
| 715 | rs949971    | G | T | -0.054016364 | 0.011610071 | 3.29E-06 | 16566 | genus..Eubacteriumhalliigroup.id.11338        |
| 716 | rs10798999  | T | C | 0.060166074  | 0.012675245 | 2.61E-06 | 16561 | genus..Eubacteriumhalliigroup.id.11338        |
| 717 | rs60254196  | G | A | -0.052283163 | 0.011186491 | 2.70E-06 | 16238 | genus..Eubacteriumhalliigroup.id.11338        |
| 718 | rs10808115  | C | A | -0.050474741 | 0.010992248 | 4.42E-06 | 16566 | genus..Eubacteriumhalliigroup.id.11338        |
| 719 | rs74018587  | T | C | 0.208942799  | 0.043821974 | 3.70E-06 | 3039  | genus..Eubacteriumhalliigroup.id.11338        |
| 720 | rs6550770   | C | T | -0.198087408 | 0.044354487 | 4.82E-06 | 4279  | genus..Eubacteriumhalliigroup.id.11338        |
| 721 | rs10501370  | T | C | -0.115588894 | 0.025248889 | 5.42E-06 | 13824 | genus..Eubacteriumhalliigroup.id.11338        |
| 722 | rs281379    | G | A | -0.049952328 | 0.011215293 | 9.33E-06 | 16130 | genus..Eubacteriumhalliigroup.id.11338        |
| 723 | rs78056098  | T | G | -0.050741114 | 0.011375822 | 8.29E-06 | 16568 | genus..Eubacteriumhalliigroup.id.11338        |
| 724 | rs138531890 | G | A | 0.153138471  | 0.034945641 | 5.43E-06 | 7710  | genus..Eubacteriumhalliigroup.id.11338        |
| 725 | rs28584818  | G | A | 0.126115364  | 0.026862747 | 4.43E-06 | 11095 | genus..Eubacteriumhalliigroup.id.11338        |
| 726 | rs117748144 | C | T | -0.126581958 | 0.028711955 | 7.86E-06 | 10861 | genus..Eubacteriumhalliigroup.id.11338        |
| 727 | rs17474256  | A | G | 0.081080509  | 0.018457309 | 9.45E-06 | 16460 | genus..Eubacteriumhalliigroup.id.11338        |
| 728 | rs630939    | T | C | -0.050891423 | 0.011435211 | 9.16E-06 | 16238 | genus..Eubacteriumhalliigroup.id.11338        |
| 729 | rs17074066  | C | T | -0.081398624 | 0.018927232 | 9.35E-06 | 15804 | genus..Eubacteriumhalliigroup.id.11338        |
| 730 | rs34297067  | G | A | -0.186906548 | 0.034147492 | 6.60E-08 | 3271  | genus..Eubacteriumnodatumgroup.id.11297       |
| 731 | rs113893692 | T | C | -0.18510716  | 0.040357325 | 5.76E-06 | 3195  | genus..Eubacteriumnodatumgroup.id.11297       |
| 732 | rs77910827  | T | C | 0.201788441  | 0.041356826 | 9.05E-07 | 3271  | genus..Eubacteriumnodatumgroup.id.11297       |
| 733 | rs61841040  | T | G | 0.160621141  | 0.034160929 | 3.56E-06 | 3295  | genus..Eubacteriumnodatumgroup.id.11297       |
| 734 | rs9425984   | C | T | -0.130233832 | 0.029234653 | 7.21E-06 | 3294  | genus..Eubacteriumnodatumgroup.id.11297       |
| 735 | rs10263623  | T | C | 0.193495904  | 0.043902338 | 8.91E-06 | 3080  | genus..Eubacteriumnodatumgroup.id.11297       |
| 736 | rs11006576  | G | A | -0.110167094 | 0.024592963 | 7.99E-06 | 3295  | genus..Eubacteriumnodatumgroup.id.11297       |
| 737 | rs7880204   | C | T | -0.125453808 | 0.027530312 | 6.84E-06 | 3294  | genus..Eubacteriumnodatumgroup.id.11297       |
| 738 | rs6818880   | G | A | -0.110080596 | 0.024596445 | 7.83E-06 | 3291  | genus..Eubacteriumnodatumgroup.id.11297       |
| 739 | rs10458299  | C | T | -0.187752781 | 0.041969011 | 8.37E-06 | 3271  | genus..Eubacteriumnodatumgroup.id.11297       |
| 740 | rs7827125   | T | C | 0.122299815  | 0.027133143 | 7.17E-06 | 3294  | genus..Eubacteriumnodatumgroup.id.11297       |
| 741 | rs12423772  | T | G | 0.140979641  | 0.029502889 | 2.63E-06 | 5321  | genus..Eubacteriumoxidoreducensgroup.id.11339 |
| 742 | rs2973294   | T | G | 0.092355871  | 0.019543871 | 2.39E-06 | 5378  | genus..Eubacteriumoxidoreducensgroup.id.11339 |
| 743 | rs34561138  | A | G | 0.216145345  | 0.04599197  | 2.51E-06 | 4186  | genus..Eubacteriumoxidoreducensgroup.id.11339 |
| 744 | rs440215    | T | C | 0.093276592  | 0.019529391 | 1.65E-06 | 5377  | genus..Eubacteriumoxidoreducensgroup.id.11339 |
| 745 | rs1425962   | C | G | 0.090610394  | 0.020061232 | 7.32E-06 | 5321  | genus..Eubacteriumoxidoreducensgroup.id.11339 |
| 746 | rs12129908  | A | C | 0.08932725   | 0.019833287 | 5.80E-06 | 5377  | genus..Eubacteriumoxidoreducensgroup.id.11339 |
| 747 | rs35398954  | G | A | -0.090140156 | 0.017460171 | 5.40E-07 | 16621 | genus..Eubacteriumrectalegroup.id.14374       |
| 748 | rs117151453 | C | G | -0.113140609 | 0.02435414  | 1.84E-06 | 13908 | genus..Eubacteriumrectalegroup.id.14374       |
| 749 | rs16960159  | G | C | -0.156595964 | 0.03362338  | 4.10E-06 | 8334  | genus..Eubacteriumrectalegroup.id.14374       |
| 750 | rs314726    | C | T | 0.052882354  | 0.010948624 | 1.38E-06 | 16966 | genus..Eubacteriumrectalegroup.id.14374       |
| 751 | rs10797540  | G | A | 0.050317907  | 0.010838946 | 3.53E-06 | 17350 | genus..Eubacteriumrectalegroup.id.14374       |
| 752 | rs10248854  | A | C | -0.052782677 | 0.01134635  | 4.21E-06 | 17348 | genus..Eubacteriumrectalegroup.id.14374       |
| 753 | rs3980709   | T | A | -0.062270145 | 0.014057159 | 6.86E-06 | 17340 | genus..Eubacteriumrectalegroup.id.14374       |
| 754 | rs2884897   | G | A | -0.129363699 | 0.028902068 | 6.44E-06 | 10813 | genus..Eubacteriumrectalegroup.id.14374       |
| 755 | rs10892089  | G | C | -0.063552174 | 0.014007233 | 6.22E-06 | 17351 | genus..Eubacteriumrectalegroup.id.14374       |
| 756 | rs143694765 | C | T | 0.087002523  | 0.01977896  | 9.75E-06 | 15124 | genus..Eubacteriumrectalegroup.id.14374       |
| 757 | rs59427698  | G | A | -0.057603509 | 0.013085337 | 5.37E-06 | 16613 | genus..Eubacteriumrectalegroup.id.14374       |
| 758 | rs62547233  | G | A | 0.0536319    | 0.012020063 | 9.90E-06 | 17347 | genus..Eubacteriumrectalegroup.id.14374       |
| 759 | rs2116427   | G | A | 0.091146051  | 0.018235307 | 4.67E-07 | 7739  | genus..Eubacteriumruminantiumgroup.id.11340   |
| 760 | rs139749    | T | C | -0.084543927 | 0.017179078 | 8.59E-07 | 7314  | genus..Eubacteriumruminantiumgroup.id.11340   |
| 761 | rs72836424  | T | C | -0.139824589 | 0.030068963 | 2.62E-06 | 7314  | genus..Eubacteriumruminantiumgroup.id.11340   |
| 762 | rs2229917   | G | A | 0.153537929  | 0.032392215 | 2.16E-06 | 7050  | genus..Eubacteriumruminantiumgroup.id.11340   |
| 763 | rs10131724  | C | A | -0.199832279 | 0.041457713 | 2.39E-06 | 5071  | genus..Eubacteriumruminantiumgroup.id.11340   |
| 764 | rs16891896  | A | G | -0.174787011 | 0.039057268 | 2.38E-06 | 4753  | genus..Eubacteriumruminantiumgroup.id.11340   |
| 765 | rs7000472   | G | A | -0.076228208 | 0.016523022 | 4.07E-06 | 7739  | genus..Eubacteriumruminantiumgroup.id.11340   |

|     | A           | B | C | D            | E           | F        | G     | H                                            |
|-----|-------------|---|---|--------------|-------------|----------|-------|----------------------------------------------|
| 766 | rs13025464  | C | T | -0.073707715 | 0.016378577 | 6.97E-06 | 7738  | genus..Eubacteriumruminantiumgroup.id.11340  |
| 767 | rs2418654   | T | C | -0.074887891 | 0.016585161 | 6.17E-06 | 7314  | genus..Eubacteriumruminantiumgroup.id.11340  |
| 768 | rs6676699   | T | G | -0.088812364 | 0.019644717 | 6.38E-06 | 7708  | genus..Eubacteriumruminantiumgroup.id.11340  |
| 769 | rs73139629  | C | A | -0.115097848 | 0.024790941 | 5.36E-06 | 7314  | genus..Eubacteriumruminantiumgroup.id.11340  |
| 770 | rs112375806 | A | T | 0.143141085  | 0.029375749 | 5.82E-06 | 7123  | genus..Eubacteriumruminantiumgroup.id.11340  |
| 771 | rs606117    | G | A | 0.083324266  | 0.018055987 | 4.82E-06 | 7263  | genus..Eubacteriumruminantiumgroup.id.11340  |
| 772 | rs57340348  | C | T | -0.097942933 | 0.021216595 | 4.93E-06 | 7314  | genus..Eubacteriumruminantiumgroup.id.11340  |
| 773 | rs2817174   | T | C | -0.073430579 | 0.016368685 | 7.87E-06 | 7710  | genus..Eubacteriumruminantiumgroup.id.11340  |
| 774 | rs10923018  | A | G | 0.072643786  | 0.016092406 | 6.80E-06 | 7739  | genus..Eubacteriumruminantiumgroup.id.11340  |
| 775 | rs11637981  | T | G | -0.073257996 | 0.016088796 | 5.44E-06 | 7718  | genus..Eubacteriumruminantiumgroup.id.11340  |
| 776 | rs17519472  | T | C | 0.10780414   | 0.023398378 | 4.70E-06 | 7710  | genus..Eubacteriumruminantiumgroup.id.11340  |
| 777 | rs209813    | A | G | -0.103488116 | 0.023639057 | 9.23E-06 | 7264  | genus..Eubacteriumruminantiumgroup.id.11340  |
| 778 | rs6048195   | T | A | -0.060359432 | 0.011657994 | 2.50E-07 | 14839 | genus..Eubacteriumventriosumgroup.id.11341   |
| 779 | rs73615400  | C | T | -0.095630317 | 0.01934276  | 9.54E-07 | 15146 | genus..Eubacteriumventriosumgroup.id.11341   |
| 780 | rs57199565  | C | T | 0.078339435  | 0.01602571  | 7.97E-07 | 14913 | genus..Eubacteriumventriosumgroup.id.11341   |
| 781 | rs11617697  | G | A | -0.143348528 | 0.028624073 | 7.22E-07 | 11497 | genus..Eubacteriumventriosumgroup.id.11341   |
| 782 | rs16884680  | T | G | -0.090642843 | 0.019190901 | 1.74E-06 | 15289 | genus..Eubacteriumventriosumgroup.id.11341   |
| 783 | rs12964517  | A | G | 0.058719806  | 0.012345332 | 2.07E-06 | 15289 | genus..Eubacteriumventriosumgroup.id.11341   |
| 784 | rs876734    | T | C | -0.061869648 | 0.013253231 | 2.89E-06 | 14913 | genus..Eubacteriumventriosumgroup.id.11341   |
| 785 | rs3809430   | C | T | -0.054817114 | 0.011842566 | 3.55E-06 | 15287 | genus..Eubacteriumventriosumgroup.id.11341   |
| 786 | rs72783037  | A | C | 0.065892572  | 0.014374684 | 6.55E-06 | 15286 | genus..Eubacteriumventriosumgroup.id.11341   |
| 787 | rs73849225  | C | T | 0.097571148  | 0.022438827 | 5.21E-06 | 14573 | genus..Eubacteriumventriosumgroup.id.11341   |
| 788 | rs9316536   | G | T | -0.081711077 | 0.018312095 | 7.84E-06 | 15289 | genus..Eubacteriumventriosumgroup.id.11341   |
| 789 | rs35179274  | T | C | -0.062726329 | 0.013785975 | 5.76E-06 | 15287 | genus..Eubacteriumventriosumgroup.id.11341   |
| 790 | rs78250280  | A | G | 0.074976242  | 0.016440448 | 3.36E-06 | 14835 | genus..Eubacteriumventriosumgroup.id.11341   |
| 791 | rs66746423  | T | C | 0.0751501    | 0.016497843 | 6.11E-06 | 14578 | genus..Eubacteriumventriosumgroup.id.11341   |
| 792 | rs6704822   | G | A | 0.073917922  | 0.016670495 | 6.62E-06 | 15289 | genus..Eubacteriumventriosumgroup.id.11341   |
| 793 | rs13082419  | T | C | -0.071552205 | 0.016136969 | 9.56E-06 | 14501 | genus..Eubacteriumventriosumgroup.id.11341   |
| 794 | rs66830358  | A | T | 0.052875209  | 0.011797227 | 6.87E-06 | 14913 | genus..Eubacteriumventriosumgroup.id.11341   |
| 795 | rs17830032  | A | G | -0.160597431 | 0.031051453 | 2.39E-07 | 9527  | genus..Eubacteriumxylanophilumgroup.id.14375 |
| 796 | rs13239072  | A | G | 0.068742734  | 0.014272832 | 1.82E-06 | 13307 | genus..Eubacteriumxylanophilumgroup.id.14375 |
| 797 | rs79582700  | G | C | -0.095167651 | 0.019996897 | 2.41E-06 | 13256 | genus..Eubacteriumxylanophilumgroup.id.14375 |
| 798 | rs12980122  | G | C | -0.108273525 | 0.023825715 | 5.02E-06 | 12039 | genus..Eubacteriumxylanophilumgroup.id.14375 |
| 799 | rs2012708   | G | A | 0.057320248  | 0.012690502 | 6.53E-06 | 13306 | genus..Eubacteriumxylanophilumgroup.id.14375 |
| 800 | rs2213117   | G | T | 0.087779736  | 0.018901228 | 4.21E-06 | 12878 | genus..Eubacteriumxylanophilumgroup.id.14375 |
| 801 | rs10140184  | C | A | 0.057679453  | 0.01259899  | 4.96E-06 | 12930 | genus..Eubacteriumxylanophilumgroup.id.14375 |
| 802 | rs10917203  | C | A | 0.061263327  | 0.013091688 | 3.15E-06 | 12930 | genus..Eubacteriumxylanophilumgroup.id.14375 |
| 803 | rs112176119 | T | C | -0.113455468 | 0.024576196 | 3.33E-06 | 12199 | genus..Eubacteriumxylanophilumgroup.id.14375 |
| 804 | rs1999224   | T | G | -0.094905143 | 0.020350281 | 3.75E-06 | 13309 | genus..Eubacteriumxylanophilumgroup.id.14375 |
| 805 | rs75586835  | G | A | -0.114497555 | 0.026345472 | 9.39E-06 | 12550 | genus..Eubacteriumxylanophilumgroup.id.14375 |
| 806 | rs4654122   | G | C | 0.055350808  | 0.012358794 | 7.20E-06 | 13309 | genus..Eubacteriumxylanophilumgroup.id.14375 |
| 807 | rs2047242   | G | A | -0.06760301  | 0.013373773 | 2.46E-07 | 13369 | genus..Ruminococcusgavreauiigroup.id.11342   |
| 808 | rs71386687  | G | T | 0.121036908  | 0.02385996  | 2.91E-07 | 11340 | genus..Ruminococcusgavreauiigroup.id.11342   |
| 809 | rs9870933   | G | A | 0.062164279  | 0.012607163 | 8.49E-07 | 13382 | genus..Ruminococcusgavreauiigroup.id.11342   |
| 810 | rs1391597   | T | C | 0.059028381  | 0.012487351 | 1.86E-06 | 13382 | genus..Ruminococcusgavreauiigroup.id.11342   |
| 811 | rs431418    | G | A | -0.094737043 | 0.02101571  | 5.54E-06 | 13289 | genus..Ruminococcusgavreauiigroup.id.11342   |
| 812 | rs10931481  | A | G | 0.061009638  | 0.013048446 | 3.38E-06 | 13382 | genus..Ruminococcusgavreauiigroup.id.11342   |
| 813 | rs289410    | A | G | -0.065492577 | 0.013910104 | 2.27E-06 | 13380 | genus..Ruminococcusgavreauiigroup.id.11342   |
| 814 | rs2105937   | G | A | 0.058021543  | 0.012780587 | 5.10E-06 | 13364 | genus..Ruminococcusgavreauiigroup.id.11342   |
| 815 | rs2166943   | C | A | 0.056697379  | 0.012349673 | 5.28E-06 | 13377 | genus..Ruminococcusgavreauiigroup.id.11342   |
| 816 | rs12539819  | T | C | 0.110653536  | 0.02406836  | 4.49E-06 | 11860 | genus..Ruminococcusgavreauiigroup.id.11342   |

|     | A          | B | C | D            | E           | F        | G     | H                                          |
|-----|------------|---|---|--------------|-------------|----------|-------|--------------------------------------------|
| 817 | rs12079579 | G | A | 0.095532379  | 0.021343619 | 5.04E-06 | 12986 | genus..Ruminococcusgavreauiigroup.id.11342 |
| 818 | rs73802842 | A | C | 0.07368081   | 0.016966478 | 7.48E-06 | 13382 | genus..Ruminococcusgavreauiigroup.id.11342 |
| 819 | rs13188803 | A | T | 0.070941873  | 0.015685519 | 7.28E-06 | 12834 | genus..Ruminococcusgavreauiigroup.id.11342 |
| 820 | rs13163520 | A | G | -0.127377481 | 0.023388325 | 5.61E-08 | 6326  | genus..Ruminococcusgnavusgroup.id.14376    |
| 821 | rs934940   | C | A | -0.105044905 | 0.022958834 | 2.74E-06 | 6309  | genus..Ruminococcusgnavusgroup.id.14376    |
| 822 | rs9872758  | C | T | 0.084923254  | 0.017664313 | 1.66E-06 | 6398  | genus..Ruminococcusgnavusgroup.id.14376    |
| 823 | rs2909242  | A | C | -0.090996476 | 0.018351012 | 7.41E-07 | 6401  | genus..Ruminococcusgnavusgroup.id.14376    |
| 824 | rs3124783  | G | A | -0.115989721 | 0.02490991  | 2.67E-06 | 6401  | genus..Ruminococcusgnavusgroup.id.14376    |
| 825 | rs62167033 | C | T | 0.185289033  | 0.039629529 | 3.50E-06 | 5194  | genus..Ruminococcusgnavusgroup.id.14376    |
| 826 | rs12989336 | A | G | -0.084686061 | 0.01879361  | 7.12E-06 | 6401  | genus..Ruminococcusgnavusgroup.id.14376    |
| 827 | rs12136548 | T | C | 0.090194566  | 0.019647574 | 3.10E-06 | 6401  | genus..Ruminococcusgnavusgroup.id.14376    |
| 828 | rs78399089 | C | T | 0.144444798  | 0.032661769 | 6.63E-06 | 5944  | genus..Ruminococcusgnavusgroup.id.14376    |
| 829 | rs11597105 | G | A | 0.114672834  | 0.025065269 | 6.95E-06 | 6328  | genus..Ruminococcusgnavusgroup.id.14376    |
| 830 | rs11864644 | C | T | -0.139803729 | 0.031825335 | 5.01E-06 | 6241  | genus..Ruminococcusgnavusgroup.id.14376    |
| 831 | rs4388134  | T | C | -0.090499668 | 0.020354415 | 9.12E-06 | 6399  | genus..Ruminococcusgnavusgroup.id.14376    |
| 832 | rs35866622 | C | T | -0.061202384 | 0.010942125 | 2.21E-08 | 17240 | genus..Ruminococcustorquesgroup.id.14377   |
| 833 | rs773123   | A | T | 0.082400465  | 0.017386159 | 1.59E-06 | 17011 | genus..Ruminococcustorquesgroup.id.14377   |
| 834 | rs10904297 | G | A | -0.167804385 | 0.038981237 | 2.69E-06 | 3143  | genus..Ruminococcustorquesgroup.id.14377   |
| 835 | rs8080469  | A | G | 0.049072662  | 0.010703625 | 3.50E-06 | 17798 | genus..Ruminococcustorquesgroup.id.14377   |
| 836 | rs77034621 | G | T | -0.151552842 | 0.033587775 | 6.07E-06 | 8567  | genus..Ruminococcustorquesgroup.id.14377   |
| 837 | rs73130967 | T | A | 0.077037483  | 0.016826423 | 3.71E-06 | 17011 | genus..Ruminococcustorquesgroup.id.14377   |
| 838 | rs1972694  | A | T | -0.061409435 | 0.013732055 | 8.93E-06 | 17353 | genus..Ruminococcustorquesgroup.id.14377   |
| 839 | rs12434631 | G | A | 0.074696994  | 0.015340053 | 2.77E-06 | 17353 | genus..Ruminococcustorquesgroup.id.14377   |
| 840 | rs4073731  | C | T | 0.065194801  | 0.014222118 | 4.05E-06 | 17793 | genus..Ruminococcustorquesgroup.id.14377   |
| 841 | rs13154778 | A | T | 0.056335821  | 0.012952644 | 7.16E-06 | 17795 | genus..Ruminococcustorquesgroup.id.14377   |
| 842 | rs1475330  | C | T | 0.052349242  | 0.011820049 | 8.13E-06 | 17353 | genus..Ruminococcustorquesgroup.id.14377   |
| 843 | rs10967781 | A | C | 0.050799379  | 0.011332229 | 8.37E-06 | 17791 | genus..Ruminococcustorquesgroup.id.14377   |
| 844 | rs8141465  | G | A | 0.048077756  | 0.010744211 | 9.65E-06 | 17791 | genus..Ruminococcustorquesgroup.id.14377   |
| 845 | rs34583783 | T | G | 0.126595837  | 0.026846063 | 4.49E-06 | 7468  | genus.Actinomyces.id.423                   |
| 846 | rs2715439  | T | C | 0.074668399  | 0.016482184 | 6.27E-06 | 7468  | genus.Actinomyces.id.423                   |
| 847 | rs4146653  | A | G | 0.098522403  | 0.021418242 | 4.50E-06 | 7468  | genus.Actinomyces.id.423                   |
| 848 | rs35011108 | G | A | 0.232633598  | 0.051204357 | 6.34E-06 | 3515  | genus.Actinomyces.id.423                   |
| 849 | rs4073240  | A | G | 0.074968682  | 0.016736817 | 7.94E-06 | 7468  | genus.Actinomyces.id.423                   |
| 850 | rs7915461  | C | T | 0.187759792  | 0.040163611 | 5.92E-06 | 5282  | genus.Actinomyces.id.423                   |
| 851 | rs71315246 | G | A | -0.09698092  | 0.021925041 | 9.83E-06 | 7468  | genus.Actinomyces.id.423                   |
| 852 | rs10787984 | C | G | 0.094315957  | 0.021351309 | 9.62E-06 | 7468  | genus.Actinomyces.id.423                   |
| 853 | rs7680684  | T | C | -0.083381015 | 0.016890088 | 9.77E-07 | 8243  | genus.Adlercreutzia.id.812                 |
| 854 | rs2147798  | G | C | 0.092295902  | 0.019212124 | 1.40E-06 | 8243  | genus.Adlercreutzia.id.812                 |
| 855 | rs80078995 | T | A | -0.113239745 | 0.023258622 | 1.57E-06 | 8243  | genus.Adlercreutzia.id.812                 |
| 856 | rs2717140  | T | C | -0.119225209 | 0.025108114 | 2.05E-06 | 8243  | genus.Adlercreutzia.id.812                 |
| 857 | rs9490822  | T | C | -0.073451202 | 0.015578896 | 2.54E-06 | 8243  | genus.Adlercreutzia.id.812                 |
| 858 | rs12522517 | T | A | -0.104884371 | 0.023469475 | 4.41E-06 | 8187  | genus.Adlercreutzia.id.812                 |
| 859 | rs13231526 | A | C | 0.143237051  | 0.031165443 | 4.81E-06 | 8051  | genus.Adlercreutzia.id.812                 |
| 860 | rs6664405  | C | T | -0.095308388 | 0.02107517  | 5.23E-06 | 8051  | genus.Adlercreutzia.id.812                 |
| 861 | rs1046175  | G | C | 0.112757932  | 0.025599407 | 6.36E-06 | 8051  | genus.Adlercreutzia.id.812                 |
| 862 | rs9915817  | C | T | 0.074921889  | 0.016833007 | 8.22E-06 | 8243  | genus.Adlercreutzia.id.812                 |
| 863 | rs55719207 | A | G | -0.069924275 | 0.015803609 | 9.61E-06 | 8243  | genus.Adlercreutzia.id.812                 |
| 864 | rs11604400 | T | C | -0.102524228 | 0.023483368 | 9.74E-06 | 8107  | genus.Adlercreutzia.id.812                 |
| 865 | rs11729256 | C | T | 0.075047253  | 0.015018395 | 6.58E-07 | 11860 | genus.Akkermansia.id.4037                  |
| 866 | rs4936098  | G | A | 0.064922492  | 0.01359338  | 1.10E-06 | 11857 | genus.Akkermansia.id.4037                  |
| 867 | rs9349825  | G | A | -0.070340692 | 0.014713291 | 2.60E-06 | 11857 | genus.Akkermansia.id.4037                  |

|     | A           | B | C | D            | E           | F        | G     | H                           |
|-----|-------------|---|---|--------------|-------------|----------|-------|-----------------------------|
| 868 | rs74542928  | C | T | 0.112622737  | 0.023643438 | 1.48E-06 | 11215 | genus.Akkermansia.id.4037   |
| 869 | rs2602429   | T | C | 0.074535241  | 0.015620127 | 2.72E-06 | 11689 | genus.Akkermansia.id.4037   |
| 870 | rs61779207  | A | G | -0.076053856 | 0.01677691  | 6.32E-06 | 11590 | genus.Akkermansia.id.4037   |
| 871 | rs11184341  | C | G | 0.065585479  | 0.01422364  | 4.06E-06 | 11863 | genus.Akkermansia.id.4037   |
| 872 | rs4242783   | A | G | 0.068545381  | 0.014770062 | 3.00E-06 | 11689 | genus.Akkermansia.id.4037   |
| 873 | rs117107102 | G | A | 0.204406166  | 0.043162894 | 3.01E-06 | 4974  | genus.Akkermansia.id.4037   |
| 874 | rs12908520  | A | G | 0.061772023  | 0.01309539  | 2.26E-06 | 11862 | genus.Akkermansia.id.4037   |
| 875 | rs111862613 | C | T | 0.091119928  | 0.019674815 | 3.39E-06 | 11620 | genus.Akkermansia.id.4037   |
| 876 | rs941682    | A | G | -0.063295745 | 0.01437768  | 9.17E-06 | 11808 | genus.Akkermansia.id.4037   |
| 877 | rs67281112  | C | G | 0.063457498  | 0.013784589 | 3.92E-06 | 17090 | genus.Alistipes.id.968      |
| 878 | rs67705352  | G | T | -0.053240398 | 0.011086401 | 1.65E-06 | 17567 | genus.Alistipes.id.968      |
| 879 | rs11769002  | A | G | -0.052879265 | 0.010938851 | 1.45E-06 | 17571 | genus.Alistipes.id.968      |
| 880 | rs7129639   | A | C | -0.052495538 | 0.010958377 | 1.78E-06 | 17571 | genus.Alistipes.id.968      |
| 881 | rs1689282   | C | A | -0.052006142 | 0.011394196 | 5.28E-06 | 17090 | genus.Alistipes.id.968      |
| 882 | rs11958296  | G | A | -0.098122204 | 0.021827201 | 9.30E-06 | 16214 | genus.Alistipes.id.968      |
| 883 | rs8130320   | G | A | -0.049001972 | 0.01071701  | 4.84E-06 | 17571 | genus.Alistipes.id.968      |
| 884 | rs2875322   | C | T | -0.058094464 | 0.013143238 | 8.78E-06 | 17459 | genus.Alistipes.id.968      |
| 885 | rs2290844   | T | C | 0.081396908  | 0.019163185 | 9.10E-06 | 17571 | genus.Alistipes.id.968      |
| 886 | rs2450745   | C | A | -0.080523959 | 0.018470178 | 7.12E-06 | 17571 | genus.Alistipes.id.968      |
| 887 | rs62576416  | C | T | 0.049264678  | 0.010973282 | 7.50E-06 | 17564 | genus.Alistipes.id.968      |
| 888 | rs1107244   | A | G | 0.075855776  | 0.017118221 | 3.59E-06 | 17571 | genus.Alistipes.id.968      |
| 889 | rs34417064  | G | A | -0.04820195  | 0.010686843 | 7.01E-06 | 17570 | genus.Alistipes.id.968      |
| 890 | rs12990744  | T | C | -0.077661791 | 0.017298561 | 8.21E-06 | 16694 | genus.Alistipes.id.968      |
| 891 | rs4810359   | G | A | -0.065242793 | 0.014615527 | 7.50E-06 | 17380 | genus.Alistipes.id.968      |
| 892 | rs602075    | G | A | 0.168974277  | 0.029697566 | 3.57E-08 | 3212  | genus.Allisonella.id.2174   |
| 893 | rs35778461  | T | C | 0.146678707  | 0.029718557 | 1.21E-06 | 3212  | genus.Allisonella.id.2174   |
| 894 | rs6742198   | A | G | 0.149151971  | 0.031648438 | 3.35E-06 | 3182  | genus.Allisonella.id.2174   |
| 895 | rs1901739   | G | T | 0.115768513  | 0.024862618 | 3.59E-06 | 3212  | genus.Allisonella.id.2174   |
| 896 | rs76904847  | A | G | 0.148523492  | 0.033485691 | 6.09E-06 | 3182  | genus.Allisonella.id.2174   |
| 897 | rs35110698  | C | T | -0.146321972 | 0.032085207 | 5.72E-06 | 3212  | genus.Allisonella.id.2174   |
| 898 | rs7898615   | G | T | 0.167966358  | 0.037358631 | 8.87E-06 | 3212  | genus.Allisonella.id.2174   |
| 899 | rs594561    | T | C | 0.112230607  | 0.025168069 | 9.41E-06 | 3212  | genus.Allisonella.id.2174   |
| 900 | rs685403    | C | G | -0.175203225 | 0.040447416 | 4.88E-06 | 3212  | genus.Allisonella.id.2174   |
| 901 | rs12675596  | T | G | 0.145668934  | 0.029067823 | 9.64E-07 | 3008  | genus.Alloprevotella.id.961 |
| 902 | rs58212166  | G | A | -0.161505876 | 0.035910233 | 7.94E-06 | 3005  | genus.Alloprevotella.id.961 |
| 903 | rs34619204  | A | G | -0.156036945 | 0.034439247 | 8.84E-06 | 3003  | genus.Alloprevotella.id.961 |
| 904 | rs17380632  | T | A | 0.125563764  | 0.028040851 | 9.27E-06 | 3009  | genus.Alloprevotella.id.961 |
| 905 | rs4680035   | G | A | -0.119599445 | 0.025944593 | 4.99E-06 | 3007  | genus.Alloprevotella.id.961 |
| 906 | rs4364940   | G | A | 0.126417748  | 0.028220735 | 8.58E-06 | 3008  | genus.Alloprevotella.id.961 |
| 907 | rs2154444   | G | T | 0.138234323  | 0.030896071 | 8.37E-06 | 3009  | genus.Alloprevotella.id.961 |
| 908 | rs816292    | C | T | -0.113002639 | 0.022040046 | 2.64E-07 | 5017  | genus.Anaerofilum.id.2053   |
| 909 | rs79598899  | T | C | 0.182585804  | 0.035728447 | 3.75E-07 | 4709  | genus.Anaerofilum.id.2053   |
| 910 | rs4506496   | A | G | 0.103089882  | 0.021286122 | 1.49E-06 | 4935  | genus.Anaerofilum.id.2053   |
| 911 | rs712981    | C | A | 0.100759617  | 0.020290248 | 6.83E-07 | 5051  | genus.Anaerofilum.id.2053   |
| 912 | rs17105491  | C | G | -0.19310744  | 0.04111866  | 1.57E-06 | 4856  | genus.Anaerofilum.id.2053   |
| 913 | rs10794359  | C | T | -0.095352431 | 0.020059979 | 2.23E-06 | 4994  | genus.Anaerofilum.id.2053   |
| 914 | rs17096874  | T | C | -0.126336895 | 0.02689189  | 2.86E-06 | 5051  | genus.Anaerofilum.id.2053   |
| 915 | rs356049    | A | G | 0.132602907  | 0.028980209 | 6.56E-06 | 4994  | genus.Anaerofilum.id.2053   |
| 916 | rs1563175   | C | A | 0.092383381  | 0.020215708 | 5.54E-06 | 5051  | genus.Anaerofilum.id.2053   |
| 917 | rs17012738  | G | T | 0.090341716  | 0.020023943 | 7.24E-06 | 5051  | genus.Anaerofilum.id.2053   |
| 918 | rs9299345   | C | T | -0.136399548 | 0.030237163 | 8.04E-06 | 5051  | genus.Anaerofilum.id.2053   |

|     | A           | B | C | D            | E           | F        | G     | H                           |
|-----|-------------|---|---|--------------|-------------|----------|-------|-----------------------------|
| 919 | rs4244069   | A | G | -0.146774518 | 0.032659424 | 9.81E-06 | 5030  | genus.Anaerofilum.id.2053   |
| 920 | rs7193624   | T | C | 0.075064239  | 0.015072346 | 5.35E-07 | 16926 | genus.Anaerostipes.id.1991  |
| 921 | rs2804244   | G | A | -0.053088986 | 0.011098265 | 2.04E-06 | 16926 | genus.Anaerostipes.id.1991  |
| 922 | rs62215703  | A | G | 0.064496549  | 0.013670195 | 1.98E-06 | 15550 | genus.Anaerostipes.id.1991  |
| 923 | rs2396460   | C | T | -0.051265275 | 0.010955542 | 2.91E-06 | 16912 | genus.Anaerostipes.id.1991  |
| 924 | rs3900776   | A | G | -0.1100132   | 0.023630171 | 2.75E-06 | 14694 | genus.Anaerostipes.id.1991  |
| 925 | rs2014785   | C | T | 0.051568685  | 0.011219863 | 4.68E-06 | 16445 | genus.Anaerostipes.id.1991  |
| 926 | rs62157625  | C | T | 0.088573041  | 0.018554786 | 1.45E-06 | 15215 | genus.Anaerostipes.id.1991  |
| 927 | rs6726833   | A | C | -0.087749727 | 0.018940832 | 3.32E-06 | 16924 | genus.Anaerostipes.id.1991  |
| 928 | rs6474958   | G | A | -0.050006507 | 0.011200088 | 6.74E-06 | 16918 | genus.Anaerostipes.id.1991  |
| 929 | rs6854026   | C | T | -0.050848158 | 0.010907505 | 3.20E-06 | 16921 | genus.Anaerostipes.id.1991  |
| 930 | rs78735375  | C | A | -0.13742857  | 0.030530436 | 5.33E-06 | 10360 | genus.Anaerostipes.id.1991  |
| 931 | rs7823228   | C | G | -0.062108471 | 0.013661403 | 5.84E-06 | 16445 | genus.Anaerostipes.id.1991  |
| 932 | rs13376554  | T | A | 0.19738899   | 0.04586424  | 7.72E-06 | 3101  | genus.Anaerostipes.id.1991  |
| 933 | rs60983350  | A | G | -0.053990065 | 0.011657526 | 4.42E-06 | 16344 | genus.Anaerostipes.id.1991  |
| 934 | rs10502061  | G | A | 0.083575226  | 0.019201667 | 7.94E-06 | 16825 | genus.Anaerostipes.id.1991  |
| 935 | rs6563550   | C | T | 0.087713486  | 0.017674473 | 2.35E-07 | 16566 | genus.Anaerotruncus.id.2054 |
| 936 | rs8005030   | T | C | 0.055444659  | 0.01178543  | 2.28E-06 | 16548 | genus.Anaerotruncus.id.2054 |
| 937 | rs4669806   | T | G | 0.057638903  | 0.012299403 | 2.42E-06 | 16566 | genus.Anaerotruncus.id.2054 |
| 938 | rs10150232  | G | A | 0.056708789  | 0.012487702 | 6.68E-06 | 16117 | genus.Anaerotruncus.id.2054 |
| 939 | rs1272208   | T | G | -0.061174271 | 0.012983073 | 4.28E-06 | 16117 | genus.Anaerotruncus.id.2054 |
| 940 | rs12056802  | G | C | 0.077419353  | 0.017717789 | 6.13E-06 | 16010 | genus.Anaerotruncus.id.2054 |
| 941 | rs11018566  | G | A | -0.156465176 | 0.036603226 | 6.14E-06 | 6278  | genus.Anaerotruncus.id.2054 |
| 942 | rs7675045   | T | A | -0.049781529 | 0.01105734  | 6.92E-06 | 16566 | genus.Anaerotruncus.id.2054 |
| 943 | rs1431492   | T | C | -0.06549964  | 0.014618811 | 7.36E-06 | 16560 | genus.Anaerotruncus.id.2054 |
| 944 | rs9347879   | C | T | 0.050618001  | 0.011049001 | 4.22E-06 | 16566 | genus.Anaerotruncus.id.2054 |
| 945 | rs17734739  | C | T | 0.066005195  | 0.014908026 | 7.43E-06 | 15927 | genus.Anaerotruncus.id.2054 |
| 946 | rs6494922   | G | A | 0.090310638  | 0.020225652 | 6.62E-06 | 16067 | genus.Anaerotruncus.id.2054 |
| 947 | rs34449434  | C | A | -0.049700388 | 0.011340216 | 9.85E-06 | 16117 | genus.Anaerotruncus.id.2054 |
| 948 | rs7155595   | A | C | 0.053933621  | 0.011890292 | 7.55E-06 | 16553 | genus.Anaerotruncus.id.2054 |
| 949 | rs115414803 | C | A | -0.144355888 | 0.031752395 | 6.83E-06 | 9273  | genus.Anaerotruncus.id.2054 |
| 950 | rs2704155   | A | T | -0.106234694 | 0.023481456 | 5.42E-06 | 12419 | genus.Anaerotruncus.id.2054 |
| 951 | rs6795673   | T | C | 0.053856525  | 0.010525127 | 3.38E-07 | 18301 | genus.Bacteroides.id.918    |
| 952 | rs28757219  | A | T | 0.081839827  | 0.017031866 | 1.29E-06 | 14833 | genus.Bacteroides.id.918    |
| 953 | rs9507307   | T | C | 0.060445621  | 0.012912793 | 2.13E-06 | 18184 | genus.Bacteroides.id.918    |
| 954 | rs66474973  | T | G | 0.081251539  | 0.016447899 | 6.81E-07 | 17405 | genus.Bacteroides.id.918    |
| 955 | rs11585893  | G | A | -0.074074561 | 0.014763325 | 1.80E-06 | 17821 | genus.Bacteroides.id.918    |
| 956 | rs495004    | G | C | -0.060747491 | 0.012986536 | 3.42E-06 | 17707 | genus.Bacteroides.id.918    |
| 957 | rs17619981  | G | T | 0.088097761  | 0.018700207 | 2.69E-06 | 15801 | genus.Bacteroides.id.918    |
| 958 | rs2023437   | C | T | -0.07823245  | 0.016763399 | 5.02E-06 | 17484 | genus.Bacteroides.id.918    |
| 959 | rs66710942  | T | C | 0.048803777  | 0.010741209 | 5.86E-06 | 17821 | genus.Bacteroides.id.918    |
| 960 | rs13207588  | G | A | -0.059204982 | 0.013119468 | 7.49E-06 | 17707 | genus.Bacteroides.id.918    |
| 961 | rs2366421   | A | T | -0.05281527  | 0.011712437 | 7.65E-06 | 18299 | genus.Bacteroides.id.918    |
| 962 | rs1340391   | C | T | -0.059200382 | 0.013224416 | 6.73E-06 | 18302 | genus.Bacteroides.id.918    |
| 963 | rs2276875   | G | A | -0.069717565 | 0.013953704 | 4.65E-07 | 13893 | genus.Barnesiella.id.944    |
| 964 | rs2428166   | A | G | -0.165858717 | 0.033730907 | 8.51E-07 | 8091  | genus.Barnesiella.id.944    |
| 965 | rs60316894  | T | C | -0.121478156 | 0.025183972 | 1.19E-06 | 12717 | genus.Barnesiella.id.944    |
| 966 | rs35177866  | G | A | 0.091712545  | 0.019013343 | 2.95E-06 | 13394 | genus.Barnesiella.id.944    |
| 967 | rs13242616  | C | T | -0.058374651 | 0.012317572 | 2.29E-06 | 13945 | genus.Barnesiella.id.944    |
| 968 | rs79795328  | G | A | -0.081864467 | 0.01764407  | 4.23E-06 | 13657 | genus.Barnesiella.id.944    |
| 969 | rs2057922   | C | G | 0.091524071  | 0.019462277 | 3.83E-06 | 14208 | genus.Barnesiella.id.944    |

|      | A           | B | C | D            | E           | F        | G     | H                            |
|------|-------------|---|---|--------------|-------------|----------|-------|------------------------------|
| 970  | rs199035    | A | G | 0.055949483  | 0.011971558 | 3.00E-06 | 13945 | genus.Barnesiella.id.944     |
| 971  | rs62251337  | G | A | -0.069076268 | 0.014937412 | 4.24E-06 | 13945 | genus.Barnesiella.id.944     |
| 972  | rs77455852  | G | T | -0.089149084 | 0.019560057 | 3.16E-06 | 13394 | genus.Barnesiella.id.944     |
| 973  | rs11155559  | C | T | 0.095602282  | 0.021296077 | 8.92E-06 | 13383 | genus.Barnesiella.id.944     |
| 974  | rs12909713  | T | C | -0.055071556 | 0.012003894 | 4.95E-06 | 14205 | genus.Barnesiella.id.944     |
| 975  | rs113258194 | G | A | 0.098992031  | 0.021412093 | 7.31E-06 | 13945 | genus.Barnesiella.id.944     |
| 976  | rs28479800  | T | A | -0.091520023 | 0.021000228 | 7.93E-06 | 12399 | genus.Barnesiella.id.944     |
| 977  | rs76181748  | T | C | -0.077855934 | 0.017163996 | 6.78E-06 | 14201 | genus.Barnesiella.id.944     |
| 978  | rs72684847  | C | T | -0.114369278 | 0.025387327 | 6.76E-06 | 12984 | genus.Barnesiella.id.944     |
| 979  | rs28418786  | G | C | -0.079132421 | 0.017495701 | 6.48E-06 | 13698 | genus.Barnesiella.id.944     |
| 980  | rs7322849   | C | T | 0.112428453  | 0.020181262 | 1.08E-08 | 14778 | genus.Bifidobacterium.id.436 |
| 981  | rs10841473  | C | G | -0.062420654 | 0.012943849 | 1.65E-06 | 14777 | genus.Bifidobacterium.id.436 |
| 982  | rs56108664  | C | T | 0.072997098  | 0.015792589 | 2.44E-06 | 13916 | genus.Bifidobacterium.id.436 |
| 983  | rs2686790   | C | T | 0.070741011  | 0.015792595 | 7.50E-06 | 14778 | genus.Bifidobacterium.id.436 |
| 984  | rs4567981   | A | T | 0.056208395  | 0.011792309 | 1.93E-06 | 14666 | genus.Bifidobacterium.id.436 |
| 985  | rs2491158   | A | G | 0.071262413  | 0.015983004 | 8.05E-06 | 14021 | genus.Bifidobacterium.id.436 |
| 986  | rs76671854  | G | C | -0.084605457 | 0.01840032  | 3.96E-06 | 13806 | genus.Bifidobacterium.id.436 |
| 987  | rs75344046  | T | C | 0.232354091  | 0.050597867 | 4.86E-06 | 3856  | genus.Bifidobacterium.id.436 |
| 988  | rs540489    | G | T | -0.063764086 | 0.013874591 | 5.19E-06 | 14561 | genus.Bifidobacterium.id.436 |
| 989  | rs857444    | T | C | 0.055823437  | 0.012121924 | 3.57E-06 | 14777 | genus.Bifidobacterium.id.436 |
| 990  | rs12022129  | A | G | 0.061935632  | 0.013893747 | 8.00E-06 | 14776 | genus.Bifidobacterium.id.436 |
| 991  | rs62181700  | A | G | -0.062464331 | 0.013120526 | 2.17E-06 | 14774 | genus.Bifidobacterium.id.436 |
| 992  | rs55888705  | G | A | 0.054631934  | 0.012113865 | 6.67E-06 | 14777 | genus.Bifidobacterium.id.436 |
| 993  | rs5746486   | C | T | -0.053621605 | 0.012080057 | 9.00E-06 | 14778 | genus.Bifidobacterium.id.436 |
| 994  | rs73797465  | G | T | -0.095356633 | 0.02092365  | 4.38E-06 | 14666 | genus.Bifidobacterium.id.436 |
| 995  | rs116261629 | C | G | 0.128112276  | 0.026135828 | 8.62E-07 | 11276 | genus.Bilophila.id.3170      |
| 996  | rs1571225   | T | C | 0.082682569  | 0.017062147 | 1.12E-06 | 12854 | genus.Bilophila.id.3170      |
| 997  | rs3827020   | T | C | 0.076647909  | 0.016064223 | 1.79E-06 | 12628 | genus.Bilophila.id.3170      |
| 998  | rs1241171   | A | G | -0.069265389 | 0.015014825 | 4.24E-06 | 12856 | genus.Bilophila.id.3170      |
| 999  | rs7802841   | A | C | 0.067009659  | 0.013770056 | 1.77E-06 | 12856 | genus.Bilophila.id.3170      |
| 1000 | rs8013541   | T | A | -0.05719913  | 0.01256729  | 5.48E-06 | 12856 | genus.Bilophila.id.3170      |
| 1001 | rs6793291   | A | C | 0.112729046  | 0.024163294 | 3.11E-06 | 11051 | genus.Bilophila.id.3170      |
| 1002 | rs1917709   | T | A | 0.118509423  | 0.02674196  | 7.37E-06 | 10886 | genus.Bilophila.id.3170      |
| 1003 | rs542415    | C | T | -0.061362319 | 0.013343594 | 4.71E-06 | 12777 | genus.Bilophila.id.3170      |
| 1004 | rs72676854  | C | T | 0.123208756  | 0.026882038 | 5.62E-06 | 11616 | genus.Bilophila.id.3170      |
| 1005 | rs4798126   | A | G | 0.073288019  | 0.016798984 | 7.15E-06 | 12777 | genus.Bilophila.id.3170      |
| 1006 | rs1969927   | A | G | 0.056458855  | 0.012693476 | 9.07E-06 | 12777 | genus.Bilophila.id.3170      |
| 1007 | rs60178956  | A | G | -0.062481785 | 0.014148499 | 8.06E-06 | 12777 | genus.Bilophila.id.3170      |
| 1008 | rs2728491   | T | G | -0.062741568 | 0.013945646 | 6.33E-06 | 12856 | genus.Bilophila.id.3170      |
| 1009 | rs2713349   | T | A | 0.061722789  | 0.014017424 | 8.63E-06 | 12853 | genus.Bilophila.id.3170      |
| 1010 | rs9899990   | G | A | -0.102702281 | 0.023387821 | 9.07E-06 | 12088 | genus.Bilophila.id.3170      |
| 1011 | rs11069458  | C | T | -0.068094659 | 0.015502996 | 7.72E-06 | 12856 | genus.Bilophila.id.3170      |
| 1012 | rs11149971  | T | C | 0.117604747  | 0.023389975 | 1.04E-06 | 16255 | genus.Blautia.id.1992        |
| 1013 | rs12453000  | T | C | 0.062533456  | 0.012998711 | 1.26E-06 | 17815 | genus.Blautia.id.1992        |
| 1014 | rs115043014 | A | G | -0.206605438 | 0.043991974 | 5.19E-06 | 4902  | genus.Blautia.id.1992        |
| 1015 | rs67794373  | T | C | 0.060170889  | 0.012344281 | 1.00E-06 | 18158 | genus.Blautia.id.1992        |
| 1016 | rs117001700 | C | T | 0.196414252  | 0.044112197 | 8.84E-06 | 4965  | genus.Blautia.id.1992        |
| 1017 | rs72973581  | G | A | 0.125169075  | 0.026540793 | 1.74E-06 | 12764 | genus.Blautia.id.1992        |
| 1018 | rs4926264   | C | T | 0.082620681  | 0.017823907 | 5.10E-06 | 18276 | genus.Blautia.id.1992        |
| 1019 | rs7860714   | G | A | -0.050217775 | 0.010985269 | 4.09E-06 | 18162 | genus.Blautia.id.1992        |
| 1020 | rs682885    | G | A | -0.049337611 | 0.010735883 | 4.49E-06 | 18274 | genus.Blautia.id.1992        |

|      | A           | B | C | D            | E           | F        | G     | H                                    |
|------|-------------|---|---|--------------|-------------|----------|-------|--------------------------------------|
| 1021 | rs2788271   | G | T | -0.057559633 | 0.013349169 | 7.16E-06 | 18276 | genus.Blautia.id.1992                |
| 1022 | rs113271346 | T | C | 0.078268222  | 0.017211647 | 6.85E-06 | 17465 | genus.Blautia.id.1992                |
| 1023 | rs3005511   | G | A | 0.050108496  | 0.01107676  | 6.19E-06 | 18276 | genus.Blautia.id.1992                |
| 1024 | rs16892041  | C | T | -0.062260496 | 0.014180398 | 8.82E-06 | 18276 | genus.Blautia.id.1992                |
| 1025 | rs56221232  | C | T | 0.082802732  | 0.016740066 | 7.62E-07 | 17133 | genus.Butyricoccus.id.2055           |
| 1026 | rs2017189   | T | G | -0.050695599 | 0.011024022 | 3.87E-06 | 17133 | genus.Butyricoccus.id.2055           |
| 1027 | rs7322368   | C | T | 0.081573314  | 0.018316651 | 5.52E-06 | 17134 | genus.Butyricoccus.id.2055           |
| 1028 | rs75238760  | A | T | 0.061942289  | 0.013994184 | 6.80E-06 | 17022 | genus.Butyricoccus.id.2055           |
| 1029 | rs12585793  | C | T | -0.262206199 | 0.056472877 | 5.79E-06 | 3135  | genus.Butyricoccus.id.2055           |
| 1030 | rs62478070  | G | T | 0.224039318  | 0.049495932 | 5.94E-06 | 4007  | genus.Butyricoccus.id.2055           |
| 1031 | rs4962426   | T | G | 0.061421574  | 0.013597912 | 7.38E-06 | 16889 | genus.Butyricoccus.id.2055           |
| 1032 | rs10084203  | G | A | 0.054969862  | 0.012356262 | 8.59E-06 | 17135 | genus.Butyricoccus.id.2055           |
| 1033 | rs12034718  | G | A | 0.0701199    | 0.01582135  | 9.58E-06 | 16237 | genus.Butyricoccus.id.2055           |
| 1034 | rs113054641 | A | G | -0.144880972 | 0.027457379 | 1.74E-07 | 9949  | genus.Butyricomonas.id.945           |
| 1035 | rs62390301  | C | T | -0.087298337 | 0.017489288 | 7.42E-07 | 10634 | genus.Butyricomonas.id.945           |
| 1036 | rs7083431   | C | A | 0.070353941  | 0.014443868 | 8.85E-07 | 10737 | genus.Butyricomonas.id.945           |
| 1037 | rs2642760   | C | G | 0.071335713  | 0.014539571 | 8.58E-07 | 10634 | genus.Butyricomonas.id.945           |
| 1038 | rs782080    | A | T | 0.065348802  | 0.01379735  | 2.23E-06 | 10733 | genus.Butyricomonas.id.945           |
| 1039 | rs1862649   | A | G | 0.113123952  | 0.024817639 | 4.76E-06 | 10123 | genus.Butyricomonas.id.945           |
| 1040 | rs12304031  | A | G | -0.086278048 | 0.019684629 | 6.70E-06 | 10658 | genus.Butyricomonas.id.945           |
| 1041 | rs71428626  | T | G | -0.133188396 | 0.028990548 | 4.80E-06 | 9776  | genus.Butyricomonas.id.945           |
| 1042 | rs78453362  | G | A | -0.14948019  | 0.032707281 | 4.06E-06 | 8207  | genus.Butyricomonas.id.945           |
| 1043 | rs326049    | G | C | 0.075969365  | 0.01676173  | 8.19E-06 | 10557 | genus.Butyricomonas.id.945           |
| 1044 | rs62130338  | A | G | -0.073260812 | 0.015832388 | 3.90E-06 | 10557 | genus.Butyricomonas.id.945           |
| 1045 | rs9657374   | T | C | 0.068071943  | 0.014817248 | 4.50E-06 | 10737 | genus.Butyricomonas.id.945           |
| 1046 | rs12458763  | C | A | 0.122036628  | 0.026958664 | 6.37E-06 | 10383 | genus.Butyricomonas.id.945           |
| 1047 | rs2114713   | T | G | 0.062720962  | 0.013899768 | 6.88E-06 | 10734 | genus.Butyricomonas.id.945           |
| 1048 | rs270727    | C | G | -0.069417267 | 0.015079545 | 5.38E-06 | 10634 | genus.Butyricomonas.id.945           |
| 1049 | rs72814525  | G | A | 0.066415351  | 0.01497662  | 8.25E-06 | 10736 | genus.Butyricomonas.id.945           |
| 1050 | rs11228830  | G | A | 0.135264872  | 0.029841132 | 6.55E-06 | 8974  | genus.Butyricomonas.id.945           |
| 1051 | rs72723662  | T | C | 0.224078206  | 0.044933642 | 7.86E-07 | 3073  | genus.Butyrivibrio.id.1993           |
| 1052 | rs7412979   | G | C | 0.186778577  | 0.038911205 | 1.71E-06 | 3480  | genus.Butyrivibrio.id.1993           |
| 1053 | rs7752361   | G | A | -0.119230279 | 0.023997488 | 7.69E-07 | 3481  | genus.Butyrivibrio.id.1993           |
| 1054 | rs4537857   | C | T | -0.124589674 | 0.026099163 | 1.80E-06 | 3482  | genus.Butyrivibrio.id.1993           |
| 1055 | rs11761679  | C | T | 0.154775363  | 0.032153939 | 2.20E-06 | 3482  | genus.Butyrivibrio.id.1993           |
| 1056 | rs16941336  | T | C | 0.127487508  | 0.026793591 | 1.53E-06 | 3482  | genus.Butyrivibrio.id.1993           |
| 1057 | rs77356209  | C | T | 0.216874487  | 0.04832994  | 6.66E-06 | 3379  | genus.Butyrivibrio.id.1993           |
| 1058 | rs74622183  | G | A | -0.201027447 | 0.042820448 | 2.46E-06 | 3478  | genus.Butyrivibrio.id.1993           |
| 1059 | rs7763512   | A | G | 0.119845684  | 0.025336711 | 3.11E-06 | 3259  | genus.Butyrivibrio.id.1993           |
| 1060 | rs142855850 | G | A | 0.205013198  | 0.045713757 | 6.86E-06 | 3234  | genus.Butyrivibrio.id.1993           |
| 1061 | rs9349693   | G | A | 0.117972728  | 0.025986063 | 5.55E-06 | 3482  | genus.Butyrivibrio.id.1993           |
| 1062 | rs486484    | G | A | -0.108348689 | 0.024000793 | 6.61E-06 | 3456  | genus.Butyrivibrio.id.1993           |
| 1063 | rs17163238  | A | G | 0.140986912  | 0.030911712 | 5.51E-06 | 3482  | genus.Butyrivibrio.id.1993           |
| 1064 | rs4928024   | G | A | -0.174709994 | 0.038933257 | 8.19E-06 | 3481  | genus.Butyrivibrio.id.1993           |
| 1065 | rs1007475   | T | G | 0.118065426  | 0.026127086 | 7.92E-06 | 3482  | genus.Butyrivibrio.id.1993           |
| 1066 | rs16934069  | C | T | -0.133784151 | 0.029944364 | 8.86E-06 | 3482  | genus.Butyrivibrio.id.1993           |
| 1067 | rs4294381   | C | T | 0.112196526  | 0.023186007 | 1.37E-06 | 6145  | genus.CandidatusSoleaferrea.id.11350 |
| 1068 | rs10090365  | G | A | -0.083441348 | 0.018098882 | 4.17E-06 | 6145  | genus.CandidatusSoleaferrea.id.11350 |
| 1069 | rs4678258   | C | T | 0.098613616  | 0.021564627 | 5.53E-06 | 6101  | genus.CandidatusSoleaferrea.id.11350 |
| 1070 | rs10108780  | G | A | -0.09283404  | 0.01998066  | 3.64E-06 | 5999  | genus.CandidatusSoleaferrea.id.11350 |
| 1071 | rs386526    | G | C | 0.081845856  | 0.018008617 | 8.33E-06 | 6144  | genus.CandidatusSoleaferrea.id.11350 |

|      | A           | B | C | D            | E           | F        | G     | H                                          |
|------|-------------|---|---|--------------|-------------|----------|-------|--------------------------------------------|
| 1072 | rs36155147  | T | C | 0.104966126  | 0.024099527 | 5.41E-06 | 5958  | genus.CandidatusSoleaferrea.id.11350       |
| 1073 | rs6881988   | C | G | -0.081913114 | 0.018185036 | 9.23E-06 | 6140  | genus.CandidatusSoleaferrea.id.11350       |
| 1074 | rs11153159  | C | G | -0.128050003 | 0.028544611 | 4.42E-06 | 6101  | genus.CandidatusSoleaferrea.id.11350       |
| 1075 | rs10809135  | C | T | 0.08348579   | 0.01824263  | 5.47E-06 | 5999  | genus.CandidatusSoleaferrea.id.11350       |
| 1076 | rs9973954   | G | A | 0.089207514  | 0.019540149 | 5.95E-06 | 6145  | genus.CandidatusSoleaferrea.id.11350       |
| 1077 | rs6489992   | G | A | -0.084043749 | 0.018703073 | 7.89E-06 | 6142  | genus.CandidatusSoleaferrea.id.11350       |
| 1078 | rs6494306   | G | A | -0.09693036  | 0.021422086 | 5.80E-06 | 6145  | genus.CandidatusSoleaferrea.id.11350       |
| 1079 | rs12500231  | T | A | 0.08138533   | 0.018269552 | 7.68E-06 | 6145  | genus.CandidatusSoleaferrea.id.11350       |
| 1080 | rs7400877   | C | T | -0.095108487 | 0.021279907 | 9.29E-06 | 6145  | genus.CandidatusSoleaferrea.id.11350       |
| 1081 | rs2193878   | A | T | 0.228255107  | 0.050924135 | 9.46E-06 | 3088  | genus.CandidatusSoleaferrea.id.11350       |
| 1082 | rs830149    | G | C | 0.184646616  | 0.039723748 | 9.58E-06 | 5065  | genus.CandidatusSoleaferrea.id.11350       |
| 1083 | rs12404911  | T | C | 0.140717216  | 0.030414222 | 2.80E-06 | 3239  | genus.Catenibacterium.id.2153              |
| 1084 | rs77285108  | A | G | -0.161826131 | 0.035344674 | 3.63E-06 | 3210  | genus.Catenibacterium.id.2153              |
| 1085 | rs73128290  | G | A | 0.129726249  | 0.02845626  | 4.29E-06 | 3239  | genus.Catenibacterium.id.2153              |
| 1086 | rs212393    | A | G | -0.135253856 | 0.02862088  | 3.62E-06 | 3239  | genus.Catenibacterium.id.2153              |
| 1087 | rs7742829   | T | C | 0.114110133  | 0.025109895 | 5.61E-06 | 3239  | genus.Catenibacterium.id.2153              |
| 1088 | rs999354    | A | T | 0.058024779  | 0.011718514 | 7.01E-07 | 16324 | genus.ChristensenellaceaeR.7group.id.11283 |
| 1089 | rs78521377  | T | C | 0.12499178   | 0.027479689 | 5.61E-06 | 12605 | genus.ChristensenellaceaeR.7group.id.11283 |
| 1090 | rs62467127  | T | C | 0.114108279  | 0.025198272 | 3.25E-06 | 12719 | genus.ChristensenellaceaeR.7group.id.11283 |
| 1091 | rs17081797  | G | A | -0.090432475 | 0.020425314 | 3.34E-06 | 16324 | genus.ChristensenellaceaeR.7group.id.11283 |
| 1092 | rs62132810  | G | A | -0.082885316 | 0.017962272 | 5.67E-06 | 15066 | genus.ChristensenellaceaeR.7group.id.11283 |
| 1093 | rs60954665  | G | T | 0.049814958  | 0.011078727 | 7.13E-06 | 16324 | genus.ChristensenellaceaeR.7group.id.11283 |
| 1094 | rs10461257  | G | A | -0.05519694  | 0.01220692  | 6.51E-06 | 15987 | genus.ChristensenellaceaeR.7group.id.11283 |
| 1095 | rs79150079  | A | C | 0.121546581  | 0.027097732 | 9.42E-06 | 11994 | genus.ChristensenellaceaeR.7group.id.11283 |
| 1096 | rs62190261  | C | A | 0.095839425  | 0.021472282 | 8.74E-06 | 15274 | genus.ChristensenellaceaeR.7group.id.11283 |
| 1097 | rs892686    | G | A | 0.051409887  | 0.011135975 | 3.97E-06 | 16325 | genus.ChristensenellaceaeR.7group.id.11283 |
| 1098 | rs73952017  | T | C | -0.086216444 | 0.019435393 | 8.46E-06 | 15274 | genus.ChristensenellaceaeR.7group.id.11283 |
| 1099 | rs550843    | C | T | -0.078324645 | 0.016920943 | 2.05E-06 | 14102 | genus.Clostridiumsensustricto1.id.1873     |
| 1100 | rs2795528   | A | G | -0.184314695 | 0.039220419 | 2.72E-06 | 6366  | genus.Clostridiumsensustricto1.id.1873     |
| 1101 | rs2817172   | T | C | 0.058138957  | 0.012449219 | 2.77E-06 | 13658 | genus.Clostridiumsensustricto1.id.1873     |
| 1102 | rs115807074 | G | A | -0.227359786 | 0.049257523 | 4.32E-06 | 4229  | genus.Clostridiumsensustricto1.id.1873     |
| 1103 | rs116847295 | T | C | 0.110021418  | 0.024603155 | 4.58E-06 | 12910 | genus.Clostridiumsensustricto1.id.1873     |
| 1104 | rs12341505  | A | G | 0.081071775  | 0.018012111 | 4.82E-06 | 14118 | genus.Clostridiumsensustricto1.id.1873     |
| 1105 | rs11586026  | T | A | 0.110966819  | 0.025049788 | 8.85E-06 | 13095 | genus.Clostridiumsensustricto1.id.1873     |
| 1106 | rs11264403  | A | G | -0.139061503 | 0.033445425 | 7.76E-06 | 7285  | genus.Clostridiumsensustricto1.id.1873     |
| 1107 | rs12490337  | G | C | -0.061687867 | 0.0137581   | 7.49E-06 | 14121 | genus.Clostridiumsensustricto1.id.1873     |
| 1108 | rs9541268   | A | C | 0.09596998   | 0.019731218 | 8.79E-07 | 12914 | genus.Collinsella.id.815                   |
| 1109 | rs2671662   | G | C | -0.056775091 | 0.011944997 | 2.22E-06 | 14334 | genus.Collinsella.id.815                   |
| 1110 | rs73052258  | A | G | 0.093017814  | 0.020265842 | 1.72E-06 | 14334 | genus.Collinsella.id.815                   |
| 1111 | rs2103510   | A | G | 0.078655101  | 0.016821672 | 2.42E-06 | 14334 | genus.Collinsella.id.815                   |
| 1112 | rs75672793  | G | A | -0.108908003 | 0.024052154 | 6.14E-06 | 12601 | genus.Collinsella.id.815                   |
| 1113 | rs10890671  | C | T | -0.053740144 | 0.011884842 | 6.52E-06 | 14334 | genus.Collinsella.id.815                   |
| 1114 | rs12921100  | T | A | 0.056375862  | 0.012701892 | 8.23E-06 | 14334 | genus.Collinsella.id.815                   |
| 1115 | rs59414781  | G | C | 0.066886563  | 0.014977291 | 9.15E-06 | 14334 | genus.Collinsella.id.815                   |
| 1116 | rs62448871  | A | C | -0.054030922 | 0.012032414 | 6.78E-06 | 14334 | genus.Collinsella.id.815                   |
| 1117 | rs1496626   | C | T | -0.072230674 | 0.016160046 | 6.78E-06 | 14334 | genus.Collinsella.id.815                   |
| 1118 | rs149807560 | A | C | -0.104264209 | 0.023584097 | 7.10E-06 | 13473 | genus.Collinsella.id.815                   |
| 1119 | rs11597285  | T | G | -0.053794651 | 0.012054849 | 9.38E-06 | 14334 | genus.Collinsella.id.815                   |
| 1120 | rs305411    | G | A | 0.129218483  | 0.026451784 | 1.01E-06 | 6777  | genus.Copro bacter .id.949                 |
| 1121 | rs3828477   | T | G | -0.091217951 | 0.019569041 | 2.89E-06 | 6798  | genus.Copro bacter .id.949                 |
| 1122 | rs55672356  | A | T | -0.193354203 | 0.041381488 | 2.74E-06 | 4903  | genus.Copro bacter .id.949                 |

|      | A           | B | C | D            | E           | F        | G     | H                                      |
|------|-------------|---|---|--------------|-------------|----------|-------|----------------------------------------|
| 1123 | rs143662916 | T | C | 0.25326389   | 0.05401412  | 3.07E-06 | 3083  | genus.Coprobacter.id.949               |
| 1124 | rs213863    | T | C | -0.088741189 | 0.018837727 | 2.35E-06 | 6798  | genus.Coprobacter.id.949               |
| 1125 | rs72821405  | C | T | -0.147365313 | 0.031997805 | 4.76E-06 | 6177  | genus.Coprobacter.id.949               |
| 1126 | rs11532348  | T | C | -0.103930603 | 0.022682638 | 5.71E-06 | 6364  | genus.Coprobacter.id.949               |
| 1127 | rs12996055  | C | A | 0.092181727  | 0.020940499 | 8.08E-06 | 6570  | genus.Coprobacter.id.949               |
| 1128 | rs12684609  | C | T | 0.100826957  | 0.022036643 | 6.10E-06 | 6364  | genus.Coprobacter.id.949               |
| 1129 | rs5011652   | C | G | 0.089959749  | 0.02000097  | 5.51E-06 | 6783  | genus.Coprobacter.id.949               |
| 1130 | rs74919520  | A | G | 0.125702917  | 0.02762957  | 5.76E-06 | 6387  | genus.Coprobacter.id.949               |
| 1131 | rs28402691  | C | T | 0.110695393  | 0.025119913 | 9.56E-06 | 6387  | genus.Coprobacter.id.949               |
| 1132 | rs189356    | A | G | 0.078112515  | 0.017191637 | 6.26E-06 | 6763  | genus.Coprobacter.id.949               |
| 1133 | rs76001613  | G | C | 0.215910371  | 0.049301859 | 9.13E-06 | 3385  | genus.Coprobacter.id.949               |
| 1134 | rs4277593   | A | G | -0.058564915 | 0.010991363 | 1.14E-07 | 16651 | genus.Coprococcus1.id.11301            |
| 1135 | rs56405618  | G | A | -0.089630001 | 0.018650815 | 1.57E-06 | 16379 | genus.Coprococcus1.id.11301            |
| 1136 | rs74101919  | C | T | -0.071898851 | 0.014465115 | 1.03E-06 | 16732 | genus.Coprococcus1.id.11301            |
| 1137 | rs1010560   | A | C | 0.058023212  | 0.012272151 | 1.96E-06 | 16723 | genus.Coprococcus1.id.11301            |
| 1138 | rs73031725  | C | T | 0.167590996  | 0.035522381 | 1.98E-06 | 7206  | genus.Coprococcus1.id.11301            |
| 1139 | rs1519491   | C | T | 0.049919694  | 0.01135578  | 8.95E-06 | 16733 | genus.Coprococcus1.id.11301            |
| 1140 | rs1576241   | G | A | -0.051034349 | 0.010953456 | 3.33E-06 | 16729 | genus.Coprococcus1.id.11301            |
| 1141 | rs73167075  | C | T | 0.057313703  | 0.01275731  | 8.57E-06 | 16733 | genus.Coprococcus1.id.11301            |
| 1142 | rs12794898  | T | G | 0.090329854  | 0.019721215 | 4.92E-06 | 15186 | genus.Coprococcus1.id.11301            |
| 1143 | rs946513    | T | C | 0.205898923  | 0.046001796 | 8.62E-06 | 4310  | genus.Coprococcus1.id.11301            |
| 1144 | rs1762123   | T | C | -0.089153231 | 0.019855409 | 8.01E-06 | 16724 | genus.Coprococcus1.id.11301            |
| 1145 | rs7784490   | G | C | -0.051854255 | 0.011313593 | 4.55E-06 | 16733 | genus.Coprococcus1.id.11301            |
| 1146 | rs12886051  | C | G | -0.052178208 | 0.011805063 | 8.01E-06 | 16633 | genus.Coprococcus1.id.11301            |
| 1147 | rs2907920   | G | A | 0.056117333  | 0.012682384 | 7.65E-06 | 16040 | genus.Coprococcus1.id.11301            |
| 1148 | rs59936925  | T | A | 0.117085317  | 0.023399473 | 9.38E-07 | 10931 | genus.Coprococcus2.id.11302            |
| 1149 | rs6677933   | T | C | -0.080440499 | 0.016421626 | 1.19E-06 | 11483 | genus.Coprococcus2.id.11302            |
| 1150 | rs1958519   | A | T | 0.066528846  | 0.013855806 | 1.58E-06 | 11009 | genus.Coprococcus2.id.11302            |
| 1151 | rs72680320  | C | T | -0.064938201 | 0.013918999 | 2.27E-06 | 11009 | genus.Coprococcus2.id.11302            |
| 1152 | rs2482516   | T | C | 0.075441464  | 0.016461865 | 4.72E-06 | 11483 | genus.Coprococcus2.id.11302            |
| 1153 | rs35890118  | G | A | -0.066536003 | 0.014766106 | 8.26E-06 | 11478 | genus.Coprococcus2.id.11302            |
| 1154 | rs9426473   | G | A | 0.072736094  | 0.016166159 | 6.31E-06 | 11486 | genus.Coprococcus2.id.11302            |
| 1155 | rs12634070  | C | T | 0.073648589  | 0.016492134 | 9.95E-06 | 11457 | genus.Coprococcus2.id.11302            |
| 1156 | rs61823518  | C | A | -0.095538071 | 0.021572431 | 6.68E-06 | 10980 | genus.Coprococcus2.id.11302            |
| 1157 | rs10070053  | G | A | 0.059431172  | 0.01353752  | 7.65E-06 | 11473 | genus.Coprococcus2.id.11302            |
| 1158 | rs8100692   | C | T | 0.057741093  | 0.011347595 | 4.16E-07 | 15829 | genus.Coprococcus3.id.11303            |
| 1159 | rs62481985  | C | G | -0.058238523 | 0.011505221 | 4.18E-07 | 15472 | genus.Coprococcus3.id.11303            |
| 1160 | rs178271    | C | T | 0.145256923  | 0.029423868 | 7.81E-07 | 10794 | genus.Coprococcus3.id.11303            |
| 1161 | rs13394391  | T | C | -0.070930158 | 0.015091785 | 2.20E-06 | 15834 | genus.Coprococcus3.id.11303            |
| 1162 | rs11080344  | T | C | 0.051692096  | 0.011305408 | 4.79E-06 | 15835 | genus.Coprococcus3.id.11303            |
| 1163 | rs7521171   | A | G | -0.05964344  | 0.012927857 | 4.32E-06 | 15472 | genus.Coprococcus3.id.11303            |
| 1164 | rs11077359  | C | T | -0.064544278 | 0.014883314 | 9.64E-06 | 15378 | genus.Coprococcus3.id.11303            |
| 1165 | rs13247359  | A | G | 0.051210989  | 0.011303088 | 7.33E-06 | 15833 | genus.Coprococcus3.id.11303            |
| 1166 | rs4575475   | A | G | 0.061951375  | 0.013778722 | 7.04E-06 | 15154 | genus.Coprococcus3.id.11303            |
| 1167 | rs10810043  | G | A | 0.051551783  | 0.011592302 | 9.27E-06 | 15833 | genus.Coprococcus3.id.11303            |
| 1168 | rs4677103   | G | A | 0.09779121   | 0.019726332 | 9.60E-07 | 7983  | genus.DefluviitaleaceaeUCG011.id.11287 |
| 1169 | rs72731813  | T | C | -0.147382972 | 0.029379613 | 4.33E-07 | 7767  | genus.DefluviitaleaceaeUCG011.id.11287 |
| 1170 | rs112893842 | C | T | 0.113810202  | 0.023280562 | 1.45E-06 | 8183  | genus.DefluviitaleaceaeUCG011.id.11287 |
| 1171 | rs9725395   | G | A | -0.138339669 | 0.029554002 | 3.52E-06 | 8011  | genus.DefluviitaleaceaeUCG011.id.11287 |
| 1172 | rs55658617  | C | T | 0.174368775  | 0.036222554 | 2.15E-06 | 6663  | genus.DefluviitaleaceaeUCG011.id.11287 |
| 1173 | rs9608282   | G | T | 0.14293919   | 0.029979298 | 2.52E-06 | 7716  | genus.DefluviitaleaceaeUCG011.id.11287 |

|      | A           | B | C | D            | E           | F        | G     | H                                      |
|------|-------------|---|---|--------------|-------------|----------|-------|----------------------------------------|
| 1174 | rs28696126  | T | A | -0.106502748 | 0.023847256 | 6.63E-06 | 7811  | genus.DefluviitaleaceaeUCG011.id.11287 |
| 1175 | rs1582238   | C | T | 0.080503588  | 0.016725672 | 1.57E-06 | 7983  | genus.DefluviitaleaceaeUCG011.id.11287 |
| 1176 | rs4344384   | T | G | 0.071597782  | 0.015630912 | 4.83E-06 | 8180  | genus.DefluviitaleaceaeUCG011.id.11287 |
| 1177 | rs2892880   | A | G | 0.081775542  | 0.018168647 | 6.83E-06 | 8182  | genus.DefluviitaleaceaeUCG011.id.11287 |
| 1178 | rs11160353  | A | T | -0.069175564 | 0.014728505 | 2.70E-06 | 9234  | genus.Desulfovibrio.id.3173            |
| 1179 | rs2853179   | T | C | 0.081197078  | 0.017423443 | 2.42E-06 | 8949  | genus.Desulfovibrio.id.3173            |
| 1180 | rs16863365  | G | A | 0.109402491  | 0.022696375 | 1.79E-06 | 8776  | genus.Desulfovibrio.id.3173            |
| 1181 | rs12031543  | C | T | -0.127184982 | 0.028188722 | 6.55E-06 | 8855  | genus.Desulfovibrio.id.3173            |
| 1182 | rs13066142  | A | G | 0.11914059   | 0.025089055 | 3.79E-06 | 9241  | genus.Desulfovibrio.id.3173            |
| 1183 | rs2590913   | A | G | 0.154495517  | 0.033939625 | 6.65E-06 | 7225  | genus.Desulfovibrio.id.3173            |
| 1184 | rs2032031   | G | A | -0.065493057 | 0.014868084 | 9.14E-06 | 9241  | genus.Desulfovibrio.id.3173            |
| 1185 | rs72647089  | G | T | -0.10659436  | 0.023933668 | 8.30E-06 | 8985  | genus.Desulfovibrio.id.3173            |
| 1186 | rs7729080   | A | C | -0.070286961 | 0.015769108 | 9.96E-06 | 9241  | genus.Desulfovibrio.id.3173            |
| 1187 | rs4797774   | A | G | 0.21258194   | 0.04700444  | 5.64E-06 | 3476  | genus.Desulfovibrio.id.3173            |
| 1188 | rs6580353   | C | T | 0.0770979    | 0.016973529 | 4.94E-06 | 9241  | genus.Desulfovibrio.id.3173            |
| 1189 | rs11166701  | A | G | -0.065530102 | 0.013186    | 5.51E-07 | 11720 | genus.Dialister.id.2183                |
| 1190 | rs517089    | A | T | 0.076227029  | 0.017041108 | 5.14E-06 | 11988 | genus.Dialister.id.2183                |
| 1191 | rs4747450   | A | C | 0.066850856  | 0.014768536 | 5.84E-06 | 11987 | genus.Dialister.id.2183                |
| 1192 | rs2314294   | C | T | 0.086593192  | 0.019371895 | 8.08E-06 | 11339 | genus.Dialister.id.2183                |
| 1193 | rs4753063   | A | G | -0.059629704 | 0.013005185 | 4.86E-06 | 11989 | genus.Dialister.id.2183                |
| 1194 | rs2435610   | C | A | 0.064713149  | 0.014331424 | 5.93E-06 | 11984 | genus.Dialister.id.2183                |
| 1195 | rs10938938  | A | G | -0.077351446 | 0.017091491 | 7.37E-06 | 11401 | genus.Dialister.id.2183                |
| 1196 | rs10138457  | C | T | -0.113053794 | 0.026193253 | 7.88E-06 | 10968 | genus.Dialister.id.2183                |
| 1197 | rs11071887  | C | T | 0.066240302  | 0.014631484 | 5.91E-06 | 11989 | genus.Dialister.id.2183                |
| 1198 | rs764177    | A | C | -0.060145359 | 0.013536587 | 9.61E-06 | 11988 | genus.Dialister.id.2183                |
| 1199 | rs76680460  | A | G | -0.16129611  | 0.036433211 | 8.19E-06 | 7176  | genus.Dialister.id.2183                |
| 1200 | rs75416973  | G | A | 0.072722304  | 0.016450983 | 9.46E-06 | 11402 | genus.Dialister.id.2183                |
| 1201 | rs13279148  | A | G | 0.071530899  | 0.015087753 | 2.25E-06 | 17605 | genus.Dorea.id.1997                    |
| 1202 | rs62503162  | G | A | -0.09740913  | 0.019437924 | 7.47E-07 | 16210 | genus.Dorea.id.1997                    |
| 1203 | rs12216169  | A | T | 0.088172222  | 0.019368315 | 5.33E-06 | 16086 | genus.Dorea.id.1997                    |
| 1204 | rs73729431  | T | C | -0.137450296 | 0.029998324 | 3.17E-06 | 9596  | genus.Dorea.id.1997                    |
| 1205 | rs4793307   | T | C | 0.057416514  | 0.012247163 | 4.01E-06 | 17600 | genus.Dorea.id.1997                    |
| 1206 | rs11150408  | G | T | 0.04882539   | 0.010906337 | 7.06E-06 | 17215 | genus.Dorea.id.1997                    |
| 1207 | rs345219    | G | T | -0.049736844 | 0.011262081 | 8.80E-06 | 17215 | genus.Dorea.id.1997                    |
| 1208 | rs62583469  | A | T | -0.063413594 | 0.014222695 | 5.78E-06 | 16819 | genus.Dorea.id.1997                    |
| 1209 | rs3005511   | G | A | 0.051612659  | 0.011285226 | 5.29E-06 | 17610 | genus.Dorea.id.1997                    |
| 1210 | rs1899291   | T | C | 0.069721719  | 0.015028462 | 4.57E-06 | 17609 | genus.Dorea.id.1997                    |
| 1211 | rs3752849   | A | G | 0.16384587   | 0.036607992 | 7.68E-06 | 5322  | genus.Dorea.id.1997                    |
| 1212 | rs12537781  | C | T | -0.055544008 | 0.012522298 | 9.15E-06 | 17608 | genus.Dorea.id.1997                    |
| 1213 | rs3851328   | G | T | -0.107774251 | 0.023652669 | 4.18E-06 | 5147  | genus.Eggerthella.id.819               |
| 1214 | rs2240838   | G | A | 0.098058185  | 0.01976528  | 7.36E-07 | 5147  | genus.Eggerthella.id.819               |
| 1215 | rs2223081   | A | G | 0.102571659  | 0.022110762 | 3.89E-06 | 5147  | genus.Eggerthella.id.819               |
| 1216 | rs112205261 | C | T | -0.188617927 | 0.040361319 | 3.35E-06 | 5036  | genus.Eggerthella.id.819               |
| 1217 | rs4985746   | A | G | 0.110522311  | 0.024765265 | 5.71E-06 | 4906  | genus.Eggerthella.id.819               |
| 1218 | rs1784446   | A | G | 0.090772774  | 0.019809579 | 5.23E-06 | 5147  | genus.Eggerthella.id.819               |
| 1219 | rs76663501  | T | C | 0.175349437  | 0.03785764  | 4.83E-06 | 4814  | genus.Eggerthella.id.819               |
| 1220 | rs6430926   | T | C | 0.08797364   | 0.019712748 | 8.37E-06 | 5147  | genus.Eggerthella.id.819               |
| 1221 | rs2877457   | A | G | -0.093486043 | 0.021020752 | 9.03E-06 | 5083  | genus.Eggerthella.id.819               |
| 1222 | rs13070736  | C | A | -0.12133107  | 0.027202382 | 7.62E-06 | 5147  | genus.Eggerthella.id.819               |
| 1223 | rs67490567  | C | T | 0.108494846  | 0.024545741 | 8.94E-06 | 5083  | genus.Eggerthella.id.819               |
| 1224 | rs3812426   | A | G | 0.106447316  | 0.0224159   | 2.72E-06 | 5583  | genus.Eisenbergiella.id.11304          |

|      | A           | B | C | D            | E           | F        | G     | H                                        |
|------|-------------|---|---|--------------|-------------|----------|-------|------------------------------------------|
| 1225 | rs1508033   | C | A | 0.091545961  | 0.019578652 | 3.23E-06 | 5580  | genus.Eisenbergiella.id.11304            |
| 1226 | rs12278566  | A | T | -0.121064706 | 0.025165804 | 1.65E-06 | 5582  | genus.Eisenbergiella.id.11304            |
| 1227 | rs2683098   | T | C | 0.107318939  | 0.022515029 | 2.24E-06 | 5582  | genus.Eisenbergiella.id.11304            |
| 1228 | rs11079158  | C | T | 0.100626785  | 0.022546032 | 7.35E-06 | 5582  | genus.Eisenbergiella.id.11304            |
| 1229 | rs13258851  | G | A | 0.137001443  | 0.030212434 | 7.75E-06 | 5583  | genus.Eisenbergiella.id.11304            |
| 1230 | rs12710729  | A | C | 0.089338392  | 0.019906928 | 9.84E-06 | 5583  | genus.Eisenbergiella.id.11304            |
| 1231 | rs12257723  | C | A | -0.095274183 | 0.021156892 | 8.85E-06 | 5582  | genus.Eisenbergiella.id.11304            |
| 1232 | rs4462860   | A | G | 0.093907092  | 0.020110429 | 4.16E-06 | 5460  | genus.Eisenbergiella.id.11304            |
| 1233 | rs11027642  | T | C | 0.129005538  | 0.028484392 | 4.92E-06 | 5583  | genus.Eisenbergiella.id.11304            |
| 1234 | rs11938607  | C | T | 0.097812525  | 0.021663562 | 8.22E-06 | 5583  | genus.Eisenbergiella.id.11304            |
| 1235 | rs1553971   | G | T | 0.120964524  | 0.026305423 | 5.27E-06 | 5583  | genus.Eisenbergiella.id.11304            |
| 1236 | rs11098863  | A | T | -0.096600831 | 0.016267701 | 3.06E-09 | 7524  | genus.Enterorhabdus.id.820               |
| 1237 | rs7923280   | T | A | 0.086001907  | 0.016914834 | 5.24E-07 | 7524  | genus.Enterorhabdus.id.820               |
| 1238 | rs114731706 | G | T | 0.182308046  | 0.038229783 | 2.17E-06 | 5956  | genus.Enterorhabdus.id.820               |
| 1239 | rs3017103   | G | A | 0.098089701  | 0.020899456 | 2.94E-06 | 7524  | genus.Enterorhabdus.id.820               |
| 1240 | rs73331712  | C | T | 0.261989512  | 0.055123019 | 4.85E-06 | 3109  | genus.Enterorhabdus.id.820               |
| 1241 | rs77655283  | A | G | 0.132987641  | 0.029830551 | 5.88E-06 | 7494  | genus.Enterorhabdus.id.820               |
| 1242 | rs9470637   | T | A | -0.075551295 | 0.016626296 | 5.70E-06 | 7524  | genus.Enterorhabdus.id.820               |
| 1243 | rs424715    | C | T | 0.081874254  | 0.017485462 | 4.41E-06 | 7524  | genus.Enterorhabdus.id.820               |
| 1244 | rs10098492  | C | T | 0.132323148  | 0.029368842 | 6.41E-06 | 7361  | genus.Enterorhabdus.id.820               |
| 1245 | rs2051957   | T | C | 0.084329062  | 0.018986405 | 8.90E-06 | 7524  | genus.Enterorhabdus.id.820               |
| 1246 | rs7221249   | G | A | 0.083986052  | 0.01427414  | 4.31E-09 | 9781  | genus.Erysipelatoclostridium.id.11381    |
| 1247 | rs710230    | C | T | 0.143381274  | 0.028151388 | 6.33E-07 | 9016  | genus.Erysipelatoclostridium.id.11381    |
| 1248 | rs4697572   | G | A | -0.081063643 | 0.016330822 | 7.59E-07 | 9779  | genus.Erysipelatoclostridium.id.11381    |
| 1249 | rs58236560  | T | G | -0.11115688  | 0.023442572 | 2.16E-06 | 9368  | genus.Erysipelatoclostridium.id.11381    |
| 1250 | rs622418    | G | A | -0.066805108 | 0.014322449 | 3.68E-06 | 9783  | genus.Erysipelatoclostridium.id.11381    |
| 1251 | rs17804233  | C | T | -0.066291401 | 0.014420319 | 4.59E-06 | 9783  | genus.Erysipelatoclostridium.id.11381    |
| 1252 | rs1434153   | A | G | -0.06845264  | 0.01524432  | 6.85E-06 | 9662  | genus.Erysipelatoclostridium.id.11381    |
| 1253 | rs340991    | G | A | -0.074048187 | 0.015889138 | 3.75E-06 | 9781  | genus.Erysipelatoclostridium.id.11381    |
| 1254 | rs6474512   | C | A | 0.067014995  | 0.014320143 | 3.02E-06 | 9783  | genus.Erysipelatoclostridium.id.11381    |
| 1255 | rs9590927   | A | G | -0.064600302 | 0.014347949 | 6.39E-06 | 9782  | genus.Erysipelatoclostridium.id.11381    |
| 1256 | rs61806970  | T | C | 0.142547998  | 0.032068815 | 9.09E-06 | 8644  | genus.Erysipelatoclostridium.id.11381    |
| 1257 | rs45480394  | G | T | -0.068713443 | 0.015183535 | 7.66E-06 | 9604  | genus.Erysipelatoclostridium.id.11381    |
| 1258 | rs2901723   | A | C | 0.064133865  | 0.014429456 | 8.79E-06 | 9662  | genus.Erysipelatoclostridium.id.11381    |
| 1259 | rs34528142  | G | C | -0.087555073 | 0.019555627 | 6.13E-06 | 9604  | genus.Erysipelatoclostridium.id.11381    |
| 1260 | rs16936671  | T | C | -0.096802556 | 0.021788273 | 6.04E-06 | 9488  | genus.Erysipelatoclostridium.id.11381    |
| 1261 | rs3804326   | G | A | 0.141469838  | 0.033635154 | 9.85E-06 | 7028  | genus.Erysipelatoclostridium.id.11381    |
| 1262 | rs28568391  | G | A | -0.058391081 | 0.011874052 | 6.42E-07 | 14544 | genus.ErysipelotrichaceaeUCG003.id.11384 |
| 1263 | rs11994308  | T | C | 0.115417413  | 0.024250252 | 1.33E-06 | 13558 | genus.ErysipelotrichaceaeUCG003.id.11384 |
| 1264 | rs76502207  | C | T | 0.14484376   | 0.028992913 | 6.41E-07 | 10740 | genus.ErysipelotrichaceaeUCG003.id.11384 |
| 1265 | rs10164067  | G | T | -0.103260131 | 0.021240502 | 1.13E-06 | 14427 | genus.ErysipelotrichaceaeUCG003.id.11384 |
| 1266 | rs8053479   | G | A | -0.083821185 | 0.018650912 | 5.83E-06 | 13813 | genus.ErysipelotrichaceaeUCG003.id.11384 |
| 1267 | rs17798136  | A | G | 0.15881755   | 0.034767431 | 3.24E-06 | 7421  | genus.ErysipelotrichaceaeUCG003.id.11384 |
| 1268 | rs59104037  | G | A | -0.095126261 | 0.020474209 | 4.48E-06 | 14848 | genus.ErysipelotrichaceaeUCG003.id.11384 |
| 1269 | rs11666127  | G | A | -0.07191871  | 0.016137058 | 7.90E-06 | 13813 | genus.ErysipelotrichaceaeUCG003.id.11384 |
| 1270 | rs62403464  | C | T | -0.073174326 | 0.015651572 | 3.44E-06 | 14899 | genus.ErysipelotrichaceaeUCG003.id.11384 |
| 1271 | rs59068084  | G | T | 0.056477243  | 0.012022387 | 3.12E-06 | 14544 | genus.ErysipelotrichaceaeUCG003.id.11384 |
| 1272 | rs73074432  | T | C | 0.072153999  | 0.016437785 | 9.99E-06 | 14217 | genus.ErysipelotrichaceaeUCG003.id.11384 |
| 1273 | rs4758231   | T | G | -0.05517544  | 0.012204675 | 6.55E-06 | 14890 | genus.ErysipelotrichaceaeUCG003.id.11384 |
| 1274 | rs74988980  | A | G | -0.133141406 | 0.034857439 | 8.64E-06 | 5944  | genus.ErysipelotrichaceaeUCG003.id.11384 |
| 1275 | rs75949021  | C | T | -0.16966706  | 0.037423793 | 3.58E-06 | 6721  | genus.ErysipelotrichaceaeUCG003.id.11384 |

|      | A           | B | C | D            | E           | F        | G     | H                                        |
|------|-------------|---|---|--------------|-------------|----------|-------|------------------------------------------|
| 1276 | rs6875357   | T | C | 0.165673441  | 0.035383116 | 6.70E-06 | 7034  | genus.ErysipelotrichaceaeUCG003.id.11384 |
| 1277 | rs79396538  | G | C | 0.084814752  | 0.019114638 | 8.63E-06 | 13750 | genus.ErysipelotrichaceaeUCG003.id.11384 |
| 1278 | rs12251396  | G | A | -0.070539949 | 0.015876598 | 9.52E-06 | 14211 | genus.ErysipelotrichaceaeUCG003.id.11384 |
| 1279 | rs2267739   | C | G | 0.115505392  | 0.02376277  | 1.42E-06 | 11853 | genus.Escherichia.Shigella.id.3504       |
| 1280 | rs1154904   | G | A | -0.061337641 | 0.01306443  | 3.04E-06 | 12002 | genus.Escherichia.Shigella.id.3504       |
| 1281 | rs73208162  | G | A | -0.119295648 | 0.024838994 | 2.19E-06 | 11073 | genus.Escherichia.Shigella.id.3504       |
| 1282 | rs113513883 | G | A | 0.172283306  | 0.038041024 | 5.28E-06 | 6280  | genus.Escherichia.Shigella.id.3504       |
| 1283 | rs7502686   | C | G | -0.136383738 | 0.030257643 | 5.90E-06 | 9990  | genus.Escherichia.Shigella.id.3504       |
| 1284 | rs57024273  | C | T | 0.062617236  | 0.013991866 | 9.70E-06 | 11853 | genus.Escherichia.Shigella.id.3504       |
| 1285 | rs113127095 | G | A | 0.151009395  | 0.032343436 | 3.33E-06 | 8433  | genus.Escherichia.Shigella.id.3504       |
| 1286 | rs117092367 | T | A | 0.11736182   | 0.026453289 | 9.65E-06 | 10304 | genus.Escherichia.Shigella.id.3504       |
| 1287 | rs112767262 | C | T | 0.073296333  | 0.01635886  | 8.21E-06 | 11771 | genus.Escherichia.Shigella.id.3504       |
| 1288 | rs11706043  | A | T | 0.07565695   | 0.016415509 | 5.87E-06 | 12001 | genus.Escherichia.Shigella.id.3504       |
| 1289 | rs592299    | C | T | -0.059200433 | 0.012948643 | 4.77E-06 | 11995 | genus.Escherichia.Shigella.id.3504       |
| 1290 | rs4731451   | A | G | -0.060988547 | 0.013515708 | 7.47E-06 | 12001 | genus.Escherichia.Shigella.id.3504       |
| 1291 | rs35555519  | G | C | 0.101975959  | 0.022288306 | 4.92E-06 | 12002 | genus.Escherichia.Shigella.id.3504       |
| 1292 | rs118526    | A | C | -0.059440114 | 0.013598005 | 8.00E-06 | 11853 | genus.Escherichia.Shigella.id.3504       |
| 1293 | rs2798105   | G | A | -0.100850689 | 0.02220448  | 8.25E-06 | 11296 | genus.Escherichia.Shigella.id.3504       |
| 1294 | rs12320842  | G | C | 0.094832958  | 0.016396224 | 7.57E-09 | 17638 | genus.Faecalibacterium.id.2057           |
| 1295 | rs6910935   | G | A | 0.134863869  | 0.027703163 | 1.38E-06 | 12640 | genus.Faecalibacterium.id.2057           |
| 1296 | rs1271565   | T | C | -0.057625117 | 0.011964928 | 1.30E-06 | 17638 | genus.Faecalibacterium.id.2057           |
| 1297 | rs75499067  | T | C | 0.227584711  | 0.046552213 | 1.76E-06 | 4526  | genus.Faecalibacterium.id.2057           |
| 1298 | rs28376661  | G | C | 0.05048173   | 0.010936797 | 3.66E-06 | 18087 | genus.Faecalibacterium.id.2057           |
| 1299 | rs10927394  | T | G | -0.232262107 | 0.051236432 | 7.02E-06 | 3495  | genus.Faecalibacterium.id.2057           |
| 1300 | rs114946999 | T | C | -0.086156499 | 0.018960043 | 5.70E-06 | 15673 | genus.Faecalibacterium.id.2057           |
| 1301 | rs79656633  | C | T | 0.145630704  | 0.032301873 | 8.14E-06 | 9080  | genus.Faecalibacterium.id.2057           |
| 1302 | rs61875484  | G | C | 0.081795263  | 0.018369023 | 9.18E-06 | 16718 | genus.Faecalibacterium.id.2057           |
| 1303 | rs12753492  | C | A | 0.064130474  | 0.014993333 | 8.80E-06 | 17525 | genus.Faecalibacterium.id.2057           |
| 1304 | rs2835874   | C | T | -0.086635636 | 0.019649581 | 7.54E-06 | 17567 | genus.Faecalibacterium.id.2057           |
| 1305 | rs11776390  | C | T | -0.078353971 | 0.017183046 | 6.40E-06 | 16718 | genus.Faecalibacterium.id.2057           |
| 1306 | rs9852893   | G | C | 0.065783419  | 0.012905622 | 3.88E-07 | 14184 | genus.FamilyXIIID3011group.id.11293      |
| 1307 | rs62200412  | T | C | -0.080085132 | 0.016383437 | 5.80E-07 | 13661 | genus.FamilyXIIID3011group.id.11293      |
| 1308 | rs16840310  | G | A | -0.060805195 | 0.012214901 | 6.75E-07 | 14201 | genus.FamilyXIIID3011group.id.11293      |
| 1309 | rs72730932  | A | C | -0.089955866 | 0.017710652 | 6.89E-07 | 13102 | genus.FamilyXIIID3011group.id.11293      |
| 1310 | rs16940167  | T | C | 0.073255157  | 0.015989797 | 3.91E-06 | 14201 | genus.FamilyXIIID3011group.id.11293      |
| 1311 | rs17156849  | A | G | -0.112890921 | 0.024529236 | 4.19E-06 | 13352 | genus.FamilyXIIID3011group.id.11293      |
| 1312 | rs62029761  | G | A | 0.128752725  | 0.027600154 | 3.89E-06 | 9655  | genus.FamilyXIIID3011group.id.11293      |
| 1313 | rs11736617  | A | G | -0.075949337 | 0.017210081 | 9.02E-06 | 13778 | genus.FamilyXIIID3011group.id.11293      |
| 1314 | rs12812672  | C | T | -0.096065015 | 0.020828023 | 2.56E-06 | 13565 | genus.FamilyXIIID3011group.id.11293      |
| 1315 | rs9276029   | G | A | -0.081138392 | 0.018566861 | 8.93E-06 | 13566 | genus.FamilyXIIID3011group.id.11293      |
| 1316 | rs12911842  | T | A | -0.081197635 | 0.018333544 | 6.91E-06 | 14125 | genus.FamilyXIIID3011group.id.11293      |
| 1317 | rs149302    | C | T | -0.064563538 | 0.014322495 | 7.48E-06 | 14192 | genus.FamilyXIIID3011group.id.11293      |
| 1318 | rs9837139   | G | A | 0.10752022   | 0.024048177 | 8.71E-06 | 13527 | genus.FamilyXIIID3011group.id.11293      |
| 1319 | rs739451    | T | C | 0.064958894  | 0.014753414 | 7.88E-06 | 14197 | genus.FamilyXIIID3011group.id.11293      |
| 1320 | rs11126423  | T | C | 0.090439883  | 0.019630134 | 5.91E-06 | 13735 | genus.FamilyXIIID3011group.id.11293      |
| 1321 | rs1426266   | C | T | -0.066552114 | 0.013715073 | 1.25E-06 | 12751 | genus.FamilyXIIICUG001.id.11294          |
| 1322 | rs12049454  | C | T | -0.064729775 | 0.013406537 | 1.17E-06 | 12748 | genus.FamilyXIIICUG001.id.11294          |
| 1323 | rs3842897   | A | G | -0.112639326 | 0.024275096 | 5.20E-06 | 12407 | genus.FamilyXIIICUG001.id.11294          |
| 1324 | rs116979587 | A | T | -0.121678937 | 0.02608207  | 3.05E-06 | 11989 | genus.FamilyXIIICUG001.id.11294          |
| 1325 | rs62414802  | T | C | -0.061190403 | 0.013456987 | 4.29E-06 | 12750 | genus.FamilyXIIICUG001.id.11294          |
| 1326 | rs2276529   | G | C | -0.075940605 | 0.016509926 | 5.36E-06 | 12748 | genus.FamilyXIIICUG001.id.11294          |

|      | A           | B | C | D            | E           | F        | G     | H                               |
|------|-------------|---|---|--------------|-------------|----------|-------|---------------------------------|
| 1327 | rs112362903 | G | A | -0.149047048 | 0.033327141 | 7.88E-06 | 8579  | genus.FamilyXIIIUCG001.id.11294 |
| 1328 | rs8076666   | G | A | 0.088655005  | 0.019809411 | 8.02E-06 | 12265 | genus.FamilyXIIIUCG001.id.11294 |
| 1329 | rs7119679   | A | G | -0.080908465 | 0.017478204 | 3.52E-06 | 12445 | genus.FamilyXIIIUCG001.id.11294 |
| 1330 | rs76463770  | G | A | 0.193129687  | 0.04198659  | 3.77E-06 | 5651  | genus.FamilyXIIIUCG001.id.11294 |
| 1331 | rs12030302  | G | A | -0.069227582 | 0.013746695 | 5.61E-07 | 10805 | genus.Flavonifractor.id.2059    |
| 1332 | rs806808    | C | T | 0.0667272    | 0.013655748 | 1.18E-06 | 10801 | genus.Flavonifractor.id.2059    |
| 1333 | rs34066017  | G | A | 0.076429405  | 0.015978927 | 1.52E-06 | 10705 | genus.Flavonifractor.id.2059    |
| 1334 | rs11811696  | C | T | -0.116062715 | 0.024101172 | 2.07E-06 | 10221 | genus.Flavonifractor.id.2059    |
| 1335 | rs11642826  | C | G | 0.146860461  | 0.032519094 | 6.65E-06 | 8151  | genus.Flavonifractor.id.2059    |
| 1336 | rs114873521 | T | C | -0.130066614 | 0.029408684 | 7.13E-06 | 9156  | genus.Flavonifractor.id.2059    |
| 1337 | rs6761463   | C | G | -0.083391953 | 0.018459615 | 8.11E-06 | 10805 | genus.Flavonifractor.id.2059    |
| 1338 | rs12038887  | G | C | 0.094271903  | 0.021164606 | 9.37E-06 | 10583 | genus.Flavonifractor.id.2059    |
| 1339 | rs4378146   | C | A | -0.061669056 | 0.012525884 | 7.20E-07 | 17384 | genus.Fusicatenibacter.id.11305 |
| 1340 | rs62353480  | G | A | -0.070139694 | 0.014558884 | 1.57E-06 | 16119 | genus.Fusicatenibacter.id.11305 |
| 1341 | rs704418    | C | T | 0.073912422  | 0.015107283 | 7.77E-07 | 16626 | genus.Fusicatenibacter.id.11305 |
| 1342 | rs2132128   | A | G | -0.07719139  | 0.016034448 | 1.08E-06 | 17370 | genus.Fusicatenibacter.id.11305 |
| 1343 | rs206581    | G | A | -0.056833856 | 0.012789397 | 8.96E-06 | 17384 | genus.Fusicatenibacter.id.11305 |
| 1344 | rs62187631  | C | T | -0.07105711  | 0.015924014 | 4.55E-06 | 16522 | genus.Fusicatenibacter.id.11305 |
| 1345 | rs2025938   | A | G | -0.096729791 | 0.020542557 | 2.99E-06 | 15626 | genus.Fusicatenibacter.id.11305 |
| 1346 | rs3303      | C | T | -0.095365713 | 0.020406992 | 3.94E-06 | 16877 | genus.Fusicatenibacter.id.11305 |
| 1347 | rs2039204   | A | T | -0.04974145  | 0.010794137 | 3.94E-06 | 17383 | genus.Fusicatenibacter.id.11305 |
| 1348 | rs8028026   | G | A | -0.079214582 | 0.018050473 | 8.06E-06 | 16522 | genus.Fusicatenibacter.id.11305 |
| 1349 | rs1864685   | C | A | -0.049479928 | 0.010810494 | 4.96E-06 | 17374 | genus.Fusicatenibacter.id.11305 |
| 1350 | rs792108    | C | T | -0.050834518 | 0.011384326 | 8.50E-06 | 16978 | genus.Fusicatenibacter.id.11305 |
| 1351 | rs60254196  | G | A | -0.049242701 | 0.010936491 | 5.47E-06 | 16978 | genus.Fusicatenibacter.id.11305 |
| 1352 | rs9905659   | A | G | -0.06161703  | 0.013657585 | 7.31E-06 | 17384 | genus.Fusicatenibacter.id.11305 |
| 1353 | rs8063430   | C | T | -0.104026455 | 0.022216952 | 4.93E-06 | 15552 | genus.Fusicatenibacter.id.11305 |
| 1354 | rs6515626   | A | G | 0.141575028  | 0.031355872 | 7.29E-06 | 7796  | genus.Fusicatenibacter.id.11305 |
| 1355 | rs10439674  | G | A | -0.057212907 | 0.013000675 | 7.68E-06 | 17381 | genus.Fusicatenibacter.id.11305 |
| 1356 | rs167879    | T | C | -0.065954324 | 0.014876261 | 5.87E-06 | 16542 | genus.Fusicatenibacter.id.11305 |
| 1357 | rs73103914  | G | A | -0.059732424 | 0.013445773 | 8.30E-06 | 17384 | genus.Fusicatenibacter.id.11305 |
| 1358 | rs76287110  | T | A | -0.242964921 | 0.046617731 | 1.67E-07 | 3483  | genus.Gordonibacter.id.821      |
| 1359 | rs7294633   | T | C | 0.128670034  | 0.024994637 | 3.44E-07 | 3723  | genus.Gordonibacter.id.821      |
| 1360 | rs7220558   | T | A | 0.116884144  | 0.02348337  | 6.71E-07 | 3723  | genus.Gordonibacter.id.821      |
| 1361 | rs71545975  | G | A | -0.153972004 | 0.033891756 | 7.04E-06 | 3556  | genus.Gordonibacter.id.821      |
| 1362 | rs35042269  | A | C | -0.180292677 | 0.040329634 | 8.11E-06 | 3595  | genus.Gordonibacter.id.821      |
| 1363 | rs72714787  | A | C | 0.181404779  | 0.037710172 | 1.43E-06 | 3723  | genus.Gordonibacter.id.821      |
| 1364 | rs322296    | A | G | 0.178689528  | 0.037721957 | 4.02E-06 | 3595  | genus.Gordonibacter.id.821      |
| 1365 | rs72939513  | G | A | -0.213989639 | 0.049059194 | 7.98E-06 | 3435  | genus.Gordonibacter.id.821      |
| 1366 | rs3765837   | G | T | -0.190728517 | 0.043360843 | 7.17E-06 | 3556  | genus.Gordonibacter.id.821      |
| 1367 | rs13412653  | C | A | 0.107597447  | 0.023922776 | 8.61E-06 | 3723  | genus.Gordonibacter.id.821      |
| 1368 | rs117347059 | C | G | -0.128261008 | 0.028512264 | 9.17E-06 | 3684  | genus.Gordonibacter.id.821      |
| 1369 | rs16955299  | A | G | -0.196422874 | 0.043353771 | 6.37E-06 | 3572  | genus.Gordonibacter.id.821      |
| 1370 | rs4596722   | G | A | 0.102908274  | 0.023157103 | 9.06E-06 | 3723  | genus.Gordonibacter.id.821      |
| 1371 | rs768830    | A | G | 0.149852407  | 0.033331454 | 7.76E-06 | 3723  | genus.Gordonibacter.id.821      |
| 1372 | rs61934597  | T | C | -0.172494533 | 0.038856681 | 8.37E-06 | 3684  | genus.Gordonibacter.id.821      |
| 1373 | rs12191680  | G | C | 0.106544332  | 0.020032321 | 1.47E-07 | 9115  | genus.Haemophilus.id.3698       |
| 1374 | rs9382510   | T | C | -0.093521046 | 0.017264852 | 7.12E-08 | 9117  | genus.Haemophilus.id.3698       |
| 1375 | rs9574096   | T | A | -0.073637529 | 0.015522726 | 2.18E-06 | 9118  | genus.Haemophilus.id.3698       |
| 1376 | rs76022354  | T | C | 0.244637568  | 0.050550437 | 1.83E-06 | 3618  | genus.Haemophilus.id.3698       |
| 1377 | rs111582866 | A | G | -0.124265408 | 0.026016016 | 1.27E-06 | 8370  | genus.Haemophilus.id.3698       |

|      | A           | B | C | D            | E           | F        | G    | H                           |
|------|-------------|---|---|--------------|-------------|----------|------|-----------------------------|
| 1378 | rs9895850   | C | T | -0.192956876 | 0.041675519 | 2.14E-06 | 4592 | genus.Haemophilus.id.3698   |
| 1379 | rs35509     | A | G | 0.128248955  | 0.026877911 | 2.01E-06 | 8430 | genus.Haemophilus.id.3698   |
| 1380 | rs78909003  | C | T | -0.246255715 | 0.050392389 | 1.67E-06 | 3559 | genus.Haemophilus.id.3698   |
| 1381 | rs9328464   | C | T | 0.072309489  | 0.014879949 | 1.42E-06 | 9119 | genus.Haemophilus.id.3698   |
| 1382 | rs4822728   | C | T | 0.070586099  | 0.015138761 | 3.48E-06 | 9119 | genus.Haemophilus.id.3698   |
| 1383 | rs10840326  | G | C | -0.067738403 | 0.015146258 | 7.37E-06 | 8888 | genus.Haemophilus.id.3698   |
| 1384 | rs12876183  | A | T | 0.074920105  | 0.016710973 | 9.62E-06 | 9110 | genus.Haemophilus.id.3698   |
| 1385 | rs10781340  | A | G | 0.094891501  | 0.020322072 | 4.32E-06 | 9037 | genus.Haemophilus.id.3698   |
| 1386 | rs56310940  | C | G | -0.108393321 | 0.024705186 | 7.23E-06 | 9119 | genus.Haemophilus.id.3698   |
| 1387 | rs761624    | G | C | 0.095980128  | 0.017953732 | 1.38E-07 | 7706 | genus.Holdemanella.id.11393 |
| 1388 | rs607782    | C | T | -0.08542142  | 0.017251511 | 7.19E-07 | 7456 | genus.Holdemanella.id.11393 |
| 1389 | rs75764681  | C | T | -0.283102607 | 0.059899873 | 1.94E-06 | 3003 | genus.Holdemanella.id.11393 |
| 1390 | rs73011279  | C | T | -0.096166927 | 0.019933645 | 1.36E-06 | 7456 | genus.Holdemanella.id.11393 |
| 1391 | rs4541991   | C | T | -0.092733374 | 0.019443459 | 2.10E-06 | 7657 | genus.Holdemanella.id.11393 |
| 1392 | rs1830029   | G | C | -0.095409594 | 0.021093039 | 5.35E-06 | 7456 | genus.Holdemanella.id.11393 |
| 1393 | rs12513188  | A | G | 0.090390629  | 0.019527621 | 4.65E-06 | 7700 | genus.Holdemanella.id.11393 |
| 1394 | rs12415649  | C | G | 0.083938435  | 0.019056694 | 7.88E-06 | 7662 | genus.Holdemanella.id.11393 |
| 1395 | rs1926302   | A | G | -0.107971755 | 0.023142056 | 7.50E-06 | 7702 | genus.Holdemanella.id.11393 |
| 1396 | rs17586763  | C | T | -0.227284509 | 0.051013457 | 7.72E-06 | 3817 | genus.Holdemanella.id.11393 |
| 1397 | rs8113760   | A | G | 0.078998984  | 0.017340046 | 4.62E-06 | 7456 | genus.Holdemanella.id.11393 |
| 1398 | rs34187114  | A | C | -0.104505235 | 0.022600956 | 5.13E-06 | 7704 | genus.Holdemanella.id.11393 |
| 1399 | rs35228298  | A | G | 0.093483215  | 0.020288588 | 7.30E-06 | 7456 | genus.Holdemanella.id.11393 |
| 1400 | rs62113381  | C | T | -0.105447171 | 0.023202912 | 5.54E-06 | 7310 | genus.Holdemanella.id.11393 |
| 1401 | rs1867876   | C | T | 0.084291862  | 0.016219181 | 2.74E-07 | 9109 | genus.Holdemania.id.2157    |
| 1402 | rs9500080   | T | C | 0.092676436  | 0.01788862  | 4.09E-07 | 9106 | genus.Holdemania.id.2157    |
| 1403 | rs6133067   | C | T | 0.091082873  | 0.017856087 | 5.17E-07 | 8863 | genus.Holdemania.id.2157    |
| 1404 | rs150096134 | A | T | 0.162139279  | 0.033208945 | 2.38E-06 | 6906 | genus.Holdemania.id.2157    |
| 1405 | rs41438744  | G | C | -0.124870498 | 0.02701295  | 2.44E-06 | 8839 | genus.Holdemania.id.2157    |
| 1406 | rs80149660  | T | C | -0.23298738  | 0.051918311 | 6.04E-06 | 3283 | genus.Holdemania.id.2157    |
| 1407 | rs116500994 | T | G | -0.137550456 | 0.029338596 | 2.34E-06 | 8432 | genus.Holdemania.id.2157    |
| 1408 | rs55888180  | G | C | 0.128670991  | 0.028279464 | 5.89E-06 | 8464 | genus.Holdemania.id.2157    |
| 1409 | rs4146507   | T | C | 0.079488043  | 0.017700231 | 7.23E-06 | 9108 | genus.Holdemania.id.2157    |
| 1410 | rs111745969 | G | A | 0.120676888  | 0.026578103 | 3.71E-06 | 8233 | genus.Holdemania.id.2157    |
| 1411 | rs113593397 | G | A | -0.128934656 | 0.028252607 | 9.36E-06 | 8296 | genus.Holdemania.id.2157    |
| 1412 | rs10885477  | C | T | -0.13513664  | 0.030189444 | 8.60E-06 | 8690 | genus.Holdemania.id.2157    |
| 1413 | rs9529719   | C | T | 0.074037972  | 0.016049433 | 5.97E-06 | 9107 | genus.Holdemania.id.2157    |
| 1414 | rs967319    | C | T | 0.078863839  | 0.017674402 | 8.38E-06 | 9108 | genus.Holdemania.id.2157    |
| 1415 | rs12701617  | G | A | -0.066061737 | 0.014942681 | 9.52E-06 | 9106 | genus.Holdemania.id.2157    |
| 1416 | rs73139538  | A | G | -0.148593595 | 0.032746911 | 7.77E-06 | 8095 | genus.Holdemania.id.2157    |
| 1417 | rs11080063  | A | G | -0.066523819 | 0.014983728 | 6.67E-06 | 9103 | genus.Holdemania.id.2157    |
| 1418 | rs901099    | G | T | -0.127180025 | 0.025092403 | 6.53E-07 | 3647 | genus.Howardella.id.2000    |
| 1419 | rs1484873   | G | A | -0.227831171 | 0.046335026 | 2.56E-06 | 3608 | genus.Howardella.id.2000    |
| 1420 | rs17167098  | A | G | -0.16936566  | 0.035206781 | 1.12E-06 | 3586 | genus.Howardella.id.2000    |
| 1421 | rs609430    | G | T | -0.112045365 | 0.023932786 | 3.34E-06 | 3798 | genus.Howardella.id.2000    |
| 1422 | rs36081916  | C | T | -0.181229725 | 0.040298718 | 4.70E-06 | 3216 | genus.Howardella.id.2000    |
| 1423 | rs12452946  | G | A | -0.105833103 | 0.022894084 | 3.80E-06 | 3800 | genus.Howardella.id.2000    |
| 1424 | rs672217    | A | G | 0.164145673  | 0.034999266 | 3.52E-06 | 3611 | genus.Howardella.id.2000    |
| 1425 | rs3791893   | G | A | 0.147035334  | 0.034023014 | 9.50E-06 | 3795 | genus.Howardella.id.2000    |
| 1426 | rs10048062  | T | C | -0.14735223  | 0.033653121 | 8.59E-06 | 3800 | genus.Howardella.id.2000    |
| 1427 | rs2154047   | A | C | -0.192557008 | 0.042009328 | 9.97E-06 | 3623 | genus.Howardella.id.2000    |
| 1428 | rs13128780  | C | T | -0.149725257 | 0.031277743 | 1.75E-06 | 3999 | genus.Hungatella.id.11306   |

|      | A           | B | C | D            | E           | F        | G     | H                              |
|------|-------------|---|---|--------------|-------------|----------|-------|--------------------------------|
| 1429 | rs72759041  | T | G | -0.126025023 | 0.028224238 | 3.86E-06 | 3910  | genus.Hungatella.id.11306      |
| 1430 | rs10044993  | A | C | 0.139546965  | 0.031674777 | 8.07E-06 | 4209  | genus.Hungatella.id.11306      |
| 1431 | rs13249325  | G | T | -0.100022583 | 0.022588331 | 9.69E-06 | 4209  | genus.Hungatella.id.11306      |
| 1432 | rs17092615  | A | G | 0.152234676  | 0.033786729 | 7.38E-06 | 4009  | genus.Hungatella.id.11306      |
| 1433 | rs10805326  | A | G | 0.077515061  | 0.013966468 | 3.55E-08 | 12303 | genus.Intestinibacter.id.11345 |
| 1434 | rs4327025   | A | G | -0.081034559 | 0.015439666 | 1.64E-07 | 12303 | genus.Intestinibacter.id.11345 |
| 1435 | rs478972    | C | T | -0.142680973 | 0.02971163  | 1.82E-06 | 10333 | genus.Intestinibacter.id.11345 |
| 1436 | rs6875660   | T | C | 0.089045542  | 0.01939052  | 3.06E-06 | 12293 | genus.Intestinibacter.id.11345 |
| 1437 | rs16938435  | C | T | -0.112188506 | 0.023543887 | 1.80E-06 | 12303 | genus.Intestinibacter.id.11345 |
| 1438 | rs6062862   | G | A | 0.092450812  | 0.020465817 | 6.68E-06 | 12189 | genus.Intestinibacter.id.11345 |
| 1439 | rs118030283 | A | G | -0.15182897  | 0.032447117 | 2.67E-06 | 8830  | genus.Intestinibacter.id.11345 |
| 1440 | rs11109097  | T | C | 0.062427238  | 0.013853923 | 5.49E-06 | 11886 | genus.Intestinibacter.id.11345 |
| 1441 | rs9348442   | T | C | 0.099081964  | 0.022162526 | 6.26E-06 | 12303 | genus.Intestinibacter.id.11345 |
| 1442 | rs447950    | G | A | 0.062834174  | 0.01366523  | 5.64E-06 | 12303 | genus.Intestinibacter.id.11345 |
| 1443 | rs62430350  | C | T | 0.151095721  | 0.035147611 | 6.84E-06 | 7650  | genus.Intestinibacter.id.11345 |
| 1444 | rs2702387   | G | A | 0.060855918  | 0.013214549 | 4.26E-06 | 12291 | genus.Intestinibacter.id.11345 |
| 1445 | rs68093214  | T | C | 0.066225756  | 0.014987729 | 9.26E-06 | 11886 | genus.Intestinibacter.id.11345 |
| 1446 | rs2098844   | T | C | -0.057529528 | 0.012841562 | 6.79E-06 | 12291 | genus.Intestinibacter.id.11345 |
| 1447 | rs893394    | A | G | 0.058332172  | 0.013072938 | 7.85E-06 | 11886 | genus.Intestinibacter.id.11345 |
| 1448 | rs11258178  | G | A | 0.066074232  | 0.013413886 | 6.98E-07 | 11766 | genus.Intestinimonas.id.2062   |
| 1449 | rs12226153  | G | A | -0.151142451 | 0.030692229 | 5.12E-07 | 9023  | genus.Intestinimonas.id.2062   |
| 1450 | rs4784055   | C | T | -0.175323954 | 0.038599023 | 8.72E-07 | 3193  | genus.Intestinimonas.id.2062   |
| 1451 | rs716604    | G | A | 0.081806835  | 0.016599238 | 8.57E-07 | 12090 | genus.Intestinimonas.id.2062   |
| 1452 | rs2930225   | T | G | 0.072952384  | 0.015294848 | 1.35E-06 | 12003 | genus.Intestinimonas.id.2062   |
| 1453 | rs62240188  | A | G | 0.130073573  | 0.026717884 | 2.20E-06 | 10252 | genus.Intestinimonas.id.2062   |
| 1454 | rs2731794   | T | C | 0.120632118  | 0.025752925 | 1.92E-06 | 11079 | genus.Intestinimonas.id.2062   |
| 1455 | rs7170984   | C | T | -0.06581157  | 0.014076733 | 2.98E-06 | 12090 | genus.Intestinimonas.id.2062   |
| 1456 | rs10262702  | C | T | 0.091801712  | 0.019488468 | 2.06E-06 | 11766 | genus.Intestinimonas.id.2062   |
| 1457 | rs12566247  | A | T | 0.063708441  | 0.013535548 | 2.19E-06 | 12076 | genus.Intestinimonas.id.2062   |
| 1458 | rs1859797   | A | G | 0.060367955  | 0.013179253 | 4.12E-06 | 11766 | genus.Intestinimonas.id.2062   |
| 1459 | rs17067892  | T | C | 0.107193792  | 0.025001344 | 6.38E-06 | 11544 | genus.Intestinimonas.id.2062   |
| 1460 | rs72982915  | T | C | 0.183157909  | 0.040274272 | 4.91E-06 | 5591  | genus.Intestinimonas.id.2062   |
| 1461 | rs994794    | C | G | -0.141904818 | 0.031507362 | 7.31E-06 | 9250  | genus.Intestinimonas.id.2062   |
| 1462 | rs4113676   | C | A | -0.218506906 | 0.049015185 | 7.42E-06 | 3170  | genus.Intestinimonas.id.2062   |
| 1463 | rs9823439   | C | T | -0.058194711 | 0.013145465 | 9.86E-06 | 11766 | genus.Intestinimonas.id.2062   |
| 1464 | rs62427239  | A | C | 0.162658132  | 0.036764706 | 9.41E-06 | 6385  | genus.Intestinimonas.id.2062   |
| 1465 | rs2276760   | G | A | -0.06852335  | 0.015254563 | 7.84E-06 | 12081 | genus.Intestinimonas.id.2062   |
| 1466 | rs6934519   | T | C | 0.069237276  | 0.015115352 | 8.57E-06 | 12089 | genus.Intestinimonas.id.2062   |
| 1467 | rs1000888   | G | C | -0.058503766 | 0.01321901  | 9.71E-06 | 12090 | genus.Intestinimonas.id.2062   |
| 1468 | rs6112314   | C | A | -0.056171476 | 0.010817419 | 2.43E-07 | 17842 | genus.Lachnospirillum.id.11308 |
| 1469 | rs62285313  | G | A | 0.086420325  | 0.018156544 | 1.58E-06 | 16991 | genus.Lachnospirillum.id.11308 |
| 1470 | rs78068103  | G | A | 0.088619929  | 0.019424795 | 3.67E-06 | 17477 | genus.Lachnospirillum.id.11308 |
| 1471 | rs615997    | C | T | 0.05117524   | 0.010649056 | 2.03E-06 | 17911 | genus.Lachnospirillum.id.11308 |
| 1472 | rs61915992  | T | A | 0.080387577  | 0.01722087  | 2.67E-06 | 16773 | genus.Lachnospirillum.id.11308 |
| 1473 | rs789029    | T | C | -0.06412885  | 0.013797406 | 3.75E-06 | 17922 | genus.Lachnospirillum.id.11308 |
| 1474 | rs12566975  | C | T | -0.04680969  | 0.010578675 | 9.57E-06 | 17921 | genus.Lachnospirillum.id.11308 |
| 1475 | rs4738679   | A | G | -0.052026675 | 0.011404049 | 4.42E-06 | 17921 | genus.Lachnospirillum.id.11308 |
| 1476 | rs1031599   | T | G | -0.078627049 | 0.017564435 | 6.31E-06 | 17398 | genus.Lachnospirillum.id.11308 |
| 1477 | rs72829893  | T | G | 0.117472377  | 0.026810315 | 5.58E-06 | 12404 | genus.Lachnospirillum.id.11308 |
| 1478 | rs3821998   | A | C | -0.0864066   | 0.019251946 | 6.72E-06 | 17920 | genus.Lachnospirillum.id.11308 |
| 1479 | rs2385421   | G | A | 0.074618572  | 0.018073408 | 7.14E-06 | 17903 | genus.Lachnospirillum.id.11308 |

|      | A           | B | C | D            | E           | F        | G     | H                                          |
|------|-------------|---|---|--------------|-------------|----------|-------|--------------------------------------------|
| 1480 | rs1528479   | A | G | -0.049779849 | 0.011191926 | 9.64E-06 | 17477 | genus.Lachnoclostridium.id.11308           |
| 1481 | rs1997204   | C | T | -0.108074801 | 0.024202203 | 5.97E-06 | 14138 | genus.Lachnoclostridium.id.11308           |
| 1482 | rs62028349  | C | G | 0.046998893  | 0.010597086 | 9.17E-06 | 17922 | genus.Lachnoclostridium.id.11308           |
| 1483 | rs13157098  | G | A | -0.076805837 | 0.015531203 | 5.99E-07 | 15947 | genus.Lachnospira.id.2004                  |
| 1484 | rs4923324   | A | G | -0.061732096 | 0.013338657 | 2.44E-06 | 16490 | genus.Lachnospira.id.2004                  |
| 1485 | rs56791201  | C | T | 0.051822993  | 0.011069673 | 2.93E-06 | 16486 | genus.Lachnospira.id.2004                  |
| 1486 | rs2326833   | G | C | -0.078495035 | 0.017109015 | 4.60E-06 | 15632 | genus.Lachnospira.id.2004                  |
| 1487 | rs4686798   | C | T | 0.053182605  | 0.011374743 | 2.74E-06 | 16497 | genus.Lachnospira.id.2004                  |
| 1488 | rs159484    | A | G | 0.079466817  | 0.017699872 | 6.68E-06 | 16487 | genus.Lachnospira.id.2004                  |
| 1489 | rs2520509   | G | A | 0.051906257  | 0.011577959 | 7.42E-06 | 16500 | genus.Lachnospira.id.2004                  |
| 1490 | rs7249113   | A | G | 0.067948308  | 0.013349587 | 3.72E-07 | 13534 | genus.LachnospiraceaeFCS020group.id.11314  |
| 1491 | rs12078956  | G | C | 0.106101007  | 0.022290421 | 2.15E-06 | 13101 | genus.LachnospiraceaeFCS020group.id.11314  |
| 1492 | rs369444    | G | C | 0.125481334  | 0.025900786 | 3.15E-06 | 12465 | genus.LachnospiraceaeFCS020group.id.11314  |
| 1493 | rs72793667  | G | A | -0.116880798 | 0.024658906 | 1.63E-06 | 12396 | genus.LachnospiraceaeFCS020group.id.11314  |
| 1494 | rs1363769   | C | T | -0.200628437 | 0.044937217 | 1.58E-06 | 3555  | genus.LachnospiraceaeFCS020group.id.11314  |
| 1495 | rs10093861  | A | G | -0.056886893 | 0.012115188 | 3.06E-06 | 13772 | genus.LachnospiraceaeFCS020group.id.11314  |
| 1496 | rs9788306   | T | C | -0.062803973 | 0.013074422 | 1.39E-06 | 13772 | genus.LachnospiraceaeFCS020group.id.11314  |
| 1497 | rs113859143 | C | G | -0.108906331 | 0.024205472 | 2.55E-06 | 13238 | genus.LachnospiraceaeFCS020group.id.11314  |
| 1498 | rs9919338   | C | G | -0.055333855 | 0.012062109 | 4.91E-06 | 13768 | genus.LachnospiraceaeFCS020group.id.11314  |
| 1499 | rs35035870  | C | T | -0.190615272 | 0.041440269 | 2.62E-06 | 5642  | genus.LachnospiraceaeFCS020group.id.11314  |
| 1500 | rs2862811   | C | T | 0.056492728  | 0.012173604 | 3.92E-06 | 13772 | genus.LachnospiraceaeFCS020group.id.11314  |
| 1501 | rs1254846   | A | G | 0.105962631  | 0.023250118 | 5.60E-06 | 13172 | genus.LachnospiraceaeFCS020group.id.11314  |
| 1502 | rs4452603   | G | T | 0.060420825  | 0.013596453 | 8.98E-06 | 13487 | genus.LachnospiraceaeFCS020group.id.11314  |
| 1503 | rs2322265   | T | C | -0.0666305   | 0.014157654 | 5.21E-06 | 13772 | genus.LachnospiraceaeFCS020group.id.11314  |
| 1504 | rs3999074   | T | G | -0.05505865  | 0.012184677 | 6.55E-06 | 13772 | genus.LachnospiraceaeFCS020group.id.11314  |
| 1505 | rs9308097   | G | A | 0.05538101   | 0.012365944 | 7.47E-06 | 13542 | genus.LachnospiraceaeFCS020group.id.11314  |
| 1506 | rs6116753   | A | G | 0.099474834  | 0.020913933 | 2.92E-06 | 6278  | genus.LachnospiraceaeNC2004group.id.11316  |
| 1507 | rs3756315   | G | A | -0.088346946 | 0.01883968  | 3.33E-06 | 6328  | genus.LachnospiraceaeNC2004group.id.11316  |
| 1508 | rs12127733  | A | G | 0.115181538  | 0.024600625 | 3.11E-06 | 6226  | genus.LachnospiraceaeNC2004group.id.11316  |
| 1509 | rs17067076  | A | G | -0.154631362 | 0.035219374 | 5.61E-06 | 4449  | genus.LachnospiraceaeNC2004group.id.11316  |
| 1510 | rs1331592   | G | C | 0.094880626  | 0.02083688  | 5.34E-06 | 6328  | genus.LachnospiraceaeNC2004group.id.11316  |
| 1511 | rs1928659   | C | T | 0.102522036  | 0.022644542 | 6.17E-06 | 5516  | genus.LachnospiraceaeNC2004group.id.11316  |
| 1512 | rs1929743   | C | T | 0.083720631  | 0.019031847 | 9.06E-06 | 6330  | genus.LachnospiraceaeNC2004group.id.11316  |
| 1513 | rs12863463  | A | G | -0.156364942 | 0.03453716  | 6.04E-06 | 5516  | genus.LachnospiraceaeNC2004group.id.11316  |
| 1514 | rs117467633 | C | T | -0.169687489 | 0.038316857 | 9.13E-06 | 5077  | genus.LachnospiraceaeNC2004group.id.11316  |
| 1515 | rs12208226  | A | C | -0.154739126 | 0.034037233 | 9.75E-06 | 5620  | genus.LachnospiraceaeNC2004group.id.11316  |
| 1516 | rs9932954   | G | A | -0.056186355 | 0.011598415 | 1.25E-06 | 15222 | genus.LachnospiraceaeND3007group.id.11317  |
| 1517 | rs13110238  | G | C | -0.063697828 | 0.01420413  | 4.48E-06 | 15019 | genus.LachnospiraceaeND3007group.id.11317  |
| 1518 | rs72776675  | C | T | -0.064706741 | 0.014797022 | 8.72E-06 | 15302 | genus.LachnospiraceaeND3007group.id.11317  |
| 1519 | rs2861203   | A | G | 0.057230395  | 0.012727879 | 7.37E-06 | 15305 | genus.LachnospiraceaeND3007group.id.11317  |
| 1520 | rs12362320  | C | G | 0.057316768  | 0.011546623 | 8.04E-07 | 16764 | genus.LachnospiraceaeNK4A136group.id.11319 |
| 1521 | rs954878    | G | A | -0.052065624 | 0.010908221 | 1.78E-06 | 17227 | genus.LachnospiraceaeNK4A136group.id.11319 |
| 1522 | rs7832116   | G | A | -0.071475594 | 0.015170307 | 3.57E-06 | 17219 | genus.LachnospiraceaeNK4A136group.id.11319 |
| 1523 | rs7616165   | T | G | -0.230541982 | 0.048346456 | 2.77E-06 | 4094  | genus.LachnospiraceaeNK4A136group.id.11319 |
| 1524 | rs76193507  | G | A | -0.229730157 | 0.049977561 | 2.93E-06 | 3578  | genus.LachnospiraceaeNK4A136group.id.11319 |
| 1525 | rs11263806  | G | A | -0.052461533 | 0.011675801 | 5.07E-06 | 17236 | genus.LachnospiraceaeNK4A136group.id.11319 |
| 1526 | rs73044693  | G | A | -0.107579587 | 0.022988374 | 3.57E-06 | 12773 | genus.LachnospiraceaeNK4A136group.id.11319 |
| 1527 | rs160061    | G | A | 0.051383089  | 0.010809407 | 2.12E-06 | 17234 | genus.LachnospiraceaeNK4A136group.id.11319 |
| 1528 | rs68104925  | C | T | -0.054910353 | 0.011538497 | 2.37E-06 | 17227 | genus.LachnospiraceaeNK4A136group.id.11319 |
| 1529 | rs12611395  | G | A | -0.090253198 | 0.019965236 | 5.83E-06 | 16486 | genus.LachnospiraceaeNK4A136group.id.11319 |
| 1530 | rs2880566   | C | T | 0.059957809  | 0.013469261 | 5.61E-06 | 17232 | genus.LachnospiraceaeNK4A136group.id.11319 |

|      | A          | B | C | D            | E           | F        | G     | H                                          |
|------|------------|---|---|--------------|-------------|----------|-------|--------------------------------------------|
| 1531 | rs28540839 | C | A | 0.050828488  | 0.011059105 | 9.34E-06 | 16764 | genus.LachnospiraceaeNK4A136group.id.11319 |
| 1532 | rs59805249 | C | T | 0.09361625   | 0.020798243 | 9.45E-06 | 15195 | genus.LachnospiraceaeNK4A136group.id.11319 |
| 1533 | rs10952110 | T | G | 0.048770868  | 0.010961435 | 9.08E-06 | 16764 | genus.LachnospiraceaeNK4A136group.id.11319 |
| 1534 | rs4955932  | C | T | -0.049228303 | 0.010938782 | 7.05E-06 | 17236 | genus.LachnospiraceaeNK4A136group.id.11319 |
| 1535 | rs437876   | C | T | 0.078463676  | 0.014476767 | 7.17E-08 | 10150 | genus.LachnospiraceaeUCG001.id.11321       |
| 1536 | rs985416   | T | C | 0.097025845  | 0.018180694 | 1.46E-07 | 9917  | genus.LachnospiraceaeUCG001.id.11321       |
| 1537 | rs2050911  | A | G | 0.075146621  | 0.015393431 | 1.11E-06 | 10148 | genus.LachnospiraceaeUCG001.id.11321       |
| 1538 | rs10815577 | G | C | -0.06837061  | 0.014369051 | 1.72E-06 | 10149 | genus.LachnospiraceaeUCG001.id.11321       |
| 1539 | rs573933   | C | T | -0.107898495 | 0.023234631 | 3.11E-06 | 10150 | genus.LachnospiraceaeUCG001.id.11321       |
| 1540 | rs78848836 | G | A | -0.118867977 | 0.025975321 | 3.38E-06 | 9506  | genus.LachnospiraceaeUCG001.id.11321       |
| 1541 | rs9403580  | T | C | 0.107800527  | 0.022977722 | 3.47E-06 | 10095 | genus.LachnospiraceaeUCG001.id.11321       |
| 1542 | rs7213933  | A | T | -0.081626876 | 0.018380006 | 9.02E-06 | 9961  | genus.LachnospiraceaeUCG001.id.11321       |
| 1543 | rs8104225  | G | A | 0.089209817  | 0.019766483 | 8.04E-06 | 9908  | genus.LachnospiraceaeUCG001.id.11321       |
| 1544 | rs74034332 | A | G | 0.168045475  | 0.038263689 | 3.33E-06 | 6004  | genus.LachnospiraceaeUCG001.id.11321       |
| 1545 | rs62496417 | G | T | -0.074850403 | 0.016568056 | 5.88E-06 | 10150 | genus.LachnospiraceaeUCG001.id.11321       |
| 1546 | rs2371284  | C | T | -0.076189302 | 0.017012675 | 7.56E-06 | 9961  | genus.LachnospiraceaeUCG001.id.11321       |
| 1547 | rs12131224 | T | C | 0.117095415  | 0.025909955 | 7.40E-06 | 9676  | genus.LachnospiraceaeUCG001.id.11321       |
| 1548 | rs4981345  | C | T | -0.068197297 | 0.014983138 | 6.09E-06 | 9961  | genus.LachnospiraceaeUCG001.id.11321       |
| 1549 | rs79476906 | A | T | -0.087088012 | 0.019700842 | 8.27E-06 | 9917  | genus.LachnospiraceaeUCG001.id.11321       |
| 1550 | rs7341608  | C | T | -0.078475713 | 0.017764768 | 9.48E-06 | 9917  | genus.LachnospiraceaeUCG001.id.11321       |
| 1551 | rs12747809 | A | G | -0.062197002 | 0.012568463 | 8.65E-07 | 14464 | genus.LachnospiraceaeUCG004.id.11324       |
| 1552 | rs2882478  | A | G | -0.057709061 | 0.011833839 | 1.21E-06 | 14466 | genus.LachnospiraceaeUCG004.id.11324       |
| 1553 | rs12673420 | A | G | 0.055435065  | 0.011837515 | 2.98E-06 | 14463 | genus.LachnospiraceaeUCG004.id.11324       |
| 1554 | rs2726805  | G | A | 0.054839706  | 0.01208444  | 6.30E-06 | 14466 | genus.LachnospiraceaeUCG004.id.11324       |
| 1555 | rs11128180 | G | A | 0.06482876   | 0.014012621 | 4.52E-06 | 14466 | genus.LachnospiraceaeUCG004.id.11324       |
| 1556 | rs12894272 | G | A | 0.057979201  | 0.012522898 | 4.34E-06 | 14463 | genus.LachnospiraceaeUCG004.id.11324       |
| 1557 | rs233486   | G | A | -0.079908769 | 0.017765984 | 6.28E-06 | 13710 | genus.LachnospiraceaeUCG004.id.11324       |
| 1558 | rs35182105 | G | A | -0.109724303 | 0.024221006 | 4.87E-06 | 13170 | genus.LachnospiraceaeUCG004.id.11324       |
| 1559 | rs6656451  | T | C | -0.054359986 | 0.01194699  | 5.57E-06 | 14458 | genus.LachnospiraceaeUCG004.id.11324       |
| 1560 | rs12072562 | C | T | 0.133103727  | 0.030356565 | 7.07E-06 | 9176  | genus.LachnospiraceaeUCG004.id.11324       |
| 1561 | rs2706242  | C | G | -0.09013993  | 0.019971219 | 9.84E-06 | 14026 | genus.LachnospiraceaeUCG004.id.11324       |
| 1562 | rs7629954  | G | A | 0.108440892  | 0.023824987 | 5.77E-06 | 12568 | genus.LachnospiraceaeUCG004.id.11324       |
| 1563 | rs10793103 | T | C | 0.097434405  | 0.018127922 | 9.35E-08 | 7014  | genus.LachnospiraceaeUCG008.id.11328       |
| 1564 | rs9873555  | C | G | -0.121161831 | 0.023346742 | 2.41E-07 | 6577  | genus.LachnospiraceaeUCG008.id.11328       |
| 1565 | rs13024781 | C | T | -0.079876878 | 0.016884555 | 2.29E-06 | 7016  | genus.LachnospiraceaeUCG008.id.11328       |
| 1566 | rs10741777 | C | T | -0.097384219 | 0.019479136 | 7.69E-07 | 7014  | genus.LachnospiraceaeUCG008.id.11328       |
| 1567 | rs955844   | C | A | 0.112064162  | 0.022836934 | 1.81E-06 | 6863  | genus.LachnospiraceaeUCG008.id.11328       |
| 1568 | rs67078837 | C | T | -0.08458483  | 0.017069269 | 7.68E-07 | 7016  | genus.LachnospiraceaeUCG008.id.11328       |
| 1569 | rs62277846 | T | C | 0.102292484  | 0.021231902 | 1.59E-06 | 7016  | genus.LachnospiraceaeUCG008.id.11328       |
| 1570 | rs10801803 | A | G | -0.117029089 | 0.024308454 | 1.40E-06 | 7017  | genus.LachnospiraceaeUCG008.id.11328       |
| 1571 | rs61944774 | G | A | 0.179838121  | 0.039379746 | 6.34E-06 | 6000  | genus.LachnospiraceaeUCG008.id.11328       |
| 1572 | rs75356640 | A | G | 0.136523454  | 0.030312828 | 9.83E-06 | 6423  | genus.LachnospiraceaeUCG008.id.11328       |
| 1573 | rs57254474 | A | G | 0.08865115   | 0.019904502 | 6.92E-06 | 7017  | genus.LachnospiraceaeUCG008.id.11328       |
| 1574 | rs11192447 | G | A | 0.126592141  | 0.024345002 | 4.69E-07 | 12695 | genus.LachnospiraceaeUCG010.id.11330       |
| 1575 | rs9981767  | C | A | 0.065506222  | 0.01319942  | 9.96E-07 | 12816 | genus.LachnospiraceaeUCG010.id.11330       |
| 1576 | rs74315802 | T | G | 0.086726244  | 0.018347717 | 3.19E-06 | 12715 | genus.LachnospiraceaeUCG010.id.11330       |
| 1577 | rs12346653 | T | C | 0.065768558  | 0.013956927 | 2.70E-06 | 12816 | genus.LachnospiraceaeUCG010.id.11330       |
| 1578 | rs10414815 | C | T | 0.104529604  | 0.023025257 | 4.24E-06 | 11564 | genus.LachnospiraceaeUCG010.id.11330       |
| 1579 | rs72761829 | T | A | 0.111883594  | 0.023889286 | 2.58E-06 | 11488 | genus.LachnospiraceaeUCG010.id.11330       |
| 1580 | rs72894957 | A | G | 0.222262976  | 0.048642511 | 5.68E-06 | 4316  | genus.LachnospiraceaeUCG010.id.11330       |
| 1581 | rs336138   | T | G | 0.077954271  | 0.017186539 | 7.48E-06 | 13236 | genus.LachnospiraceaeUCG010.id.11330       |

|      | A           | B | C | D            | E           | F        | G     | H                                    |
|------|-------------|---|---|--------------|-------------|----------|-------|--------------------------------------|
| 1582 | rs4576377   | C | A | -0.057200131 | 0.012704307 | 7.63E-06 | 13225 | genus.LachnospiraceaeUCG010.id.11330 |
| 1583 | rs2833528   | T | C | -0.056214807 | 0.012776299 | 9.92E-06 | 13233 | genus.LachnospiraceaeUCG010.id.11330 |
| 1584 | rs2153460   | T | A | -0.068403784 | 0.015656159 | 9.17E-06 | 13236 | genus.LachnospiraceaeUCG010.id.11330 |
| 1585 | rs17730011  | A | G | -0.070235733 | 0.015706022 | 7.85E-06 | 13226 | genus.LachnospiraceaeUCG010.id.11330 |
| 1586 | rs921925    | C | A | 0.098507745  | 0.020322897 | 9.72E-07 | 6952  | genus.Lactobacillus.id.1837          |
| 1587 | rs16861661  | A | G | -0.183146977 | 0.038148013 | 1.28E-06 | 5325  | genus.Lactobacillus.id.1837          |
| 1588 | rs768253    | G | T | -0.079195015 | 0.017179101 | 4.25E-06 | 6958  | genus.Lactobacillus.id.1837          |
| 1589 | rs11674854  | T | C | -0.085268613 | 0.017650364 | 1.59E-06 | 6655  | genus.Lactobacillus.id.1837          |
| 1590 | rs328312    | A | T | 0.081509206  | 0.016944121 | 1.41E-06 | 6950  | genus.Lactobacillus.id.1837          |
| 1591 | rs6092149   | T | A | -0.080134426 | 0.01714896  | 3.29E-06 | 6906  | genus.Lactobacillus.id.1837          |
| 1592 | rs75127669  | A | C | 0.13978419   | 0.031041446 | 6.83E-06 | 6840  | genus.Lactobacillus.id.1837          |
| 1593 | rs77478751  | G | A | -0.219885755 | 0.047575911 | 7.33E-06 | 3669  | genus.Lactobacillus.id.1837          |
| 1594 | rs62314653  | A | C | 0.187691889  | 0.039458456 | 2.24E-06 | 5944  | genus.Lactobacillus.id.1837          |
| 1595 | rs7399658   | A | G | -0.107133701 | 0.022188263 | 3.12E-06 | 6613  | genus.Lactobacillus.id.1837          |
| 1596 | rs12693845  | T | C | -0.080544718 | 0.017742876 | 8.96E-06 | 6958  | genus.Lactobacillus.id.1837          |
| 1597 | rs34757988  | C | G | 0.122293892  | 0.022897605 | 8.95E-08 | 4055  | genus.Lactococcus.id.1851            |
| 1598 | rs757872    | C | G | 0.140799135  | 0.027581978 | 4.37E-07 | 3792  | genus.Lactococcus.id.1851            |
| 1599 | rs123059    | C | T | -0.136709792 | 0.02746936  | 1.27E-06 | 3760  | genus.Lactococcus.id.1851            |
| 1600 | rs4766997   | T | C | 0.114599246  | 0.023839024 | 2.06E-06 | 4053  | genus.Lactococcus.id.1851            |
| 1601 | rs10417872  | G | T | 0.118305772  | 0.024521975 | 1.29E-06 | 4056  | genus.Lactococcus.id.1851            |
| 1602 | rs6674304   | T | C | 0.200757712  | 0.044212138 | 6.18E-06 | 3869  | genus.Lactococcus.id.1851            |
| 1603 | rs7992246   | C | T | 0.104232064  | 0.023078643 | 4.45E-06 | 4057  | genus.Lactococcus.id.1851            |
| 1604 | rs55910161  | T | C | 0.146425945  | 0.030736694 | 2.36E-06 | 3836  | genus.Lactococcus.id.1851            |
| 1605 | rs12621813  | A | G | 0.108422776  | 0.023997845 | 6.61E-06 | 4057  | genus.Lactococcus.id.1851            |
| 1606 | rs2293361   | T | C | -0.199221089 | 0.043096892 | 1.40E-06 | 3787  | genus.Lactococcus.id.1851            |
| 1607 | rs17168302  | A | G | 0.191856546  | 0.042476093 | 6.29E-06 | 4023  | genus.Lactococcus.id.1851            |
| 1608 | rs61884471  | A | G | 0.124426313  | 0.024843116 | 1.01E-06 | 11559 | genus.Marvinbryantia.id.2005         |
| 1609 | rs2724813   | G | A | -0.084076924 | 0.01675508  | 6.28E-07 | 11610 | genus.Marvinbryantia.id.2005         |
| 1610 | rs1187983   | T | C | -0.093545581 | 0.019317443 | 2.02E-06 | 11896 | genus.Marvinbryantia.id.2005         |
| 1611 | rs2842896   | T | C | -0.0649396   | 0.013114646 | 7.25E-07 | 11709 | genus.Marvinbryantia.id.2005         |
| 1612 | rs11645029  | C | G | -0.060618043 | 0.013155125 | 4.15E-06 | 11709 | genus.Marvinbryantia.id.2005         |
| 1613 | rs12963345  | C | G | -0.05968101  | 0.013228853 | 6.60E-06 | 11709 | genus.Marvinbryantia.id.2005         |
| 1614 | rs2863363   | G | A | 0.063486062  | 0.013632279 | 3.11E-06 | 11950 | genus.Marvinbryantia.id.2005         |
| 1615 | rs72948274  | C | A | -0.126353989 | 0.02722118  | 3.26E-06 | 11561 | genus.Marvinbryantia.id.2005         |
| 1616 | rs146541147 | A | G | 0.118845391  | 0.02684231  | 6.86E-06 | 10778 | genus.Marvinbryantia.id.2005         |
| 1617 | rs11620597  | C | T | 0.119479349  | 0.027168773 | 7.80E-06 | 11031 | genus.Marvinbryantia.id.2005         |
| 1618 | rs8006832   | T | G | -0.095241547 | 0.021669867 | 6.58E-06 | 11412 | genus.Marvinbryantia.id.2005         |
| 1619 | rs3125832   | C | A | 0.067932264  | 0.015011987 | 5.03E-06 | 11709 | genus.Marvinbryantia.id.2005         |
| 1620 | rs76029318  | C | T | 0.22284888   | 0.045431939 | 1.08E-06 | 3387  | genus.Methanobrevibacter.id.123      |
| 1621 | rs894996    | A | C | 0.214212565  | 0.045604463 | 3.82E-06 | 3479  | genus.Methanobrevibacter.id.123      |
| 1622 | rs1334944   | C | T | 0.115196507  | 0.025549236 | 7.61E-06 | 3586  | genus.Methanobrevibacter.id.123      |
| 1623 | rs6776814   | C | T | -0.188956311 | 0.041990543 | 8.05E-06 | 3283  | genus.Methanobrevibacter.id.123      |
| 1624 | rs4779844   | C | G | 0.109638988  | 0.024797947 | 9.28E-06 | 3585  | genus.Methanobrevibacter.id.123      |
| 1625 | rs4802933   | G | A | -0.135628431 | 0.030813872 | 9.74E-06 | 3586  | genus.Methanobrevibacter.id.123      |
| 1626 | rs503751    | G | C | 0.061829433  | 0.011888659 | 2.08E-07 | 14218 | genus.Odoribacter.id.952             |
| 1627 | rs77779484  | A | G | -0.133489405 | 0.026852607 | 6.56E-07 | 11935 | genus.Odoribacter.id.952             |
| 1628 | rs10423795  | T | C | 0.055069483  | 0.012116411 | 6.58E-06 | 14135 | genus.Odoribacter.id.952             |
| 1629 | rs6856150   | A | G | 0.088192184  | 0.019414623 | 6.06E-06 | 14597 | genus.Odoribacter.id.952             |
| 1630 | rs10093869  | G | A | -0.057779486 | 0.012538929 | 3.67E-06 | 14218 | genus.Odoribacter.id.952             |
| 1631 | rs4793970   | G | A | -0.057632938 | 0.012915412 | 6.03E-06 | 14687 | genus.Odoribacter.id.952             |
| 1632 | rs74553962  | G | T | 0.121448819  | 0.026410563 | 9.49E-06 | 11803 | genus.Odoribacter.id.952             |

|      | A           | B | C | D            | E           | F        | G     | H                            |
|------|-------------|---|---|--------------|-------------|----------|-------|------------------------------|
| 1633 | rs28417404  | G | A | -0.072689645 | 0.016137195 | 3.68E-06 | 14698 | genus.Odoribacter.id.952     |
| 1634 | rs16918425  | T | A | 0.099978081  | 0.022378451 | 8.85E-06 | 13689 | genus.Odoribacter.id.952     |
| 1635 | rs1035588   | G | A | -0.108148115 | 0.023684753 | 4.86E-06 | 3739  | genus.Olsenella.id.822       |
| 1636 | rs62112538  | T | C | -0.199430349 | 0.040703259 | 1.19E-06 | 3630  | genus.Olsenella.id.822       |
| 1637 | rs35225860  | G | A | -0.223603655 | 0.048239131 | 3.87E-06 | 3630  | genus.Olsenella.id.822       |
| 1638 | rs72691585  | A | C | -0.249078856 | 0.052081416 | 2.95E-06 | 3078  | genus.Olsenella.id.822       |
| 1639 | rs9460691   | A | C | 0.119965803  | 0.026864494 | 7.28E-06 | 3739  | genus.Olsenella.id.822       |
| 1640 | rs17148768  | A | G | 0.140434164  | 0.029560175 | 2.20E-06 | 3648  | genus.Olsenella.id.822       |
| 1641 | rs61090148  | G | A | -0.104782706 | 0.023134258 | 6.44E-06 | 3739  | genus.Olsenella.id.822       |
| 1642 | rs7540303   | T | C | 0.108043794  | 0.023637952 | 5.32E-06 | 3739  | genus.Olsenella.id.822       |
| 1643 | rs2759329   | A | G | -0.111131408 | 0.02372184  | 3.43E-06 | 3739  | genus.Olsenella.id.822       |
| 1644 | rs6046522   | T | C | 0.12293822   | 0.026992758 | 4.48E-06 | 3705  | genus.Olsenella.id.822       |
| 1645 | rs8066522   | A | G | -0.106528718 | 0.02403789  | 9.70E-06 | 3739  | genus.Olsenella.id.822       |
| 1646 | rs234108    | G | A | 0.074955279  | 0.015263201 | 9.16E-07 | 8694  | genus.Oscillibacter.id.2063  |
| 1647 | rs36095275  | T | C | -0.07523683  | 0.015686113 | 1.40E-06 | 8694  | genus.Oscillibacter.id.2063  |
| 1648 | rs11627628  | C | T | 0.143960728  | 0.029022314 | 1.01E-06 | 8486  | genus.Oscillibacter.id.2063  |
| 1649 | rs133832    | C | A | -0.079552688 | 0.016241059 | 1.15E-06 | 8926  | genus.Oscillibacter.id.2063  |
| 1650 | rs12649930  | G | T | 0.121588701  | 0.025961173 | 4.09E-06 | 8794  | genus.Oscillibacter.id.2063  |
| 1651 | rs75453768  | T | G | 0.122120078  | 0.026862946 | 5.35E-06 | 8256  | genus.Oscillibacter.id.2063  |
| 1652 | rs16866406  | G | A | 0.098876509  | 0.02087954  | 3.08E-06 | 8930  | genus.Oscillibacter.id.2063  |
| 1653 | rs761240    | G | T | -0.176639573 | 0.038881196 | 2.04E-06 | 5185  | genus.Oscillibacter.id.2063  |
| 1654 | rs61883564  | G | A | -0.1013514   | 0.022101565 | 3.39E-06 | 8930  | genus.Oscillibacter.id.2063  |
| 1655 | rs16934185  | G | A | -0.129567532 | 0.028156999 | 4.38E-06 | 8492  | genus.Oscillibacter.id.2063  |
| 1656 | rs12417956  | G | C | 0.078543098  | 0.017407454 | 6.03E-06 | 8928  | genus.Oscillibacter.id.2063  |
| 1657 | rs6901560   | G | C | 0.085503217  | 0.018693038 | 6.21E-06 | 8525  | genus.Oscillibacter.id.2063  |
| 1658 | rs62206502  | A | C | -0.068142274 | 0.015134881 | 6.60E-06 | 8883  | genus.Oscillibacter.id.2063  |
| 1659 | rs137917150 | A | T | -0.174992153 | 0.038839403 | 4.62E-06 | 5733  | genus.Oscillibacter.id.2063  |
| 1660 | rs11990279  | C | T | -0.082493414 | 0.018045748 | 4.94E-06 | 8528  | genus.Oscillibacter.id.2063  |
| 1661 | rs12206468  | A | G | -0.133015789 | 0.026973335 | 1.04E-06 | 9554  | genus.Oscillospira.id.2064   |
| 1662 | rs73038677  | A | T | -0.083210036 | 0.016866557 | 1.09E-06 | 10195 | genus.Oscillospira.id.2064   |
| 1663 | rs1954532   | C | T | -0.082624583 | 0.017525166 | 2.27E-06 | 9841  | genus.Oscillospira.id.2064   |
| 1664 | rs28889936  | C | A | 0.114050943  | 0.025283847 | 3.37E-06 | 9758  | genus.Oscillospira.id.2064   |
| 1665 | rs751183    | C | T | -0.07743224  | 0.017221553 | 6.85E-06 | 9841  | genus.Oscillospira.id.2064   |
| 1666 | rs8076323   | G | A | 0.07153922   | 0.015653872 | 5.61E-06 | 10193 | genus.Oscillospira.id.2064   |
| 1667 | rs72866977  | C | A | -0.130569033 | 0.028167414 | 5.63E-06 | 9098  | genus.Oscillospira.id.2064   |
| 1668 | rs62422654  | T | C | 0.089845572  | 0.019808815 | 6.47E-06 | 9769  | genus.Oscillospira.id.2064   |
| 1669 | rs12925026  | C | T | 0.135590113  | 0.030677984 | 9.31E-06 | 8200  | genus.Oscillospira.id.2064   |
| 1670 | rs4428215   | A | G | 0.130292636  | 0.0242237   | 7.51E-08 | 4655  | genus.Oxalobacter.id.2978    |
| 1671 | rs736744    | T | C | 0.117882083  | 0.021126239 | 2.57E-08 | 4655  | genus.Oxalobacter.id.2978    |
| 1672 | rs6000536   | T | C | -0.130991749 | 0.025380356 | 2.06E-07 | 4654  | genus.Oxalobacter.id.2978    |
| 1673 | rs36057338  | T | G | 0.207847028  | 0.042143922 | 8.80E-07 | 4244  | genus.Oxalobacter.id.2978    |
| 1674 | rs6071435   | A | T | -0.105512319 | 0.021488964 | 1.07E-06 | 4635  | genus.Oxalobacter.id.2978    |
| 1675 | rs12002250  | C | A | 0.217122385  | 0.046631729 | 1.42E-06 | 4297  | genus.Oxalobacter.id.2978    |
| 1676 | rs1569853   | C | T | -0.138077533 | 0.029698126 | 3.65E-06 | 4492  | genus.Oxalobacter.id.2978    |
| 1677 | rs11108500  | G | A | -0.199099074 | 0.04273266  | 3.74E-06 | 4303  | genus.Oxalobacter.id.2978    |
| 1678 | rs10464997  | A | G | 0.137690928  | 0.029480352 | 3.30E-06 | 4650  | genus.Oxalobacter.id.2978    |
| 1679 | rs111966731 | C | T | 0.213114454  | 0.047162014 | 7.30E-06 | 3931  | genus.Oxalobacter.id.2978    |
| 1680 | rs6993398   | A | G | 0.127217146  | 0.027885461 | 7.13E-06 | 4656  | genus.Oxalobacter.id.2978    |
| 1681 | rs3862635   | T | C | -0.172142003 | 0.039402609 | 9.19E-06 | 4469  | genus.Oxalobacter.id.2978    |
| 1682 | rs60884758  | T | C | -0.07026666  | 0.014224884 | 5.71E-07 | 17293 | genus.Parabacteroides.id.954 |
| 1683 | rs3860755   | C | G | 0.055878381  | 0.011662454 | 1.71E-06 | 17294 | genus.Parabacteroides.id.954 |

|      | A           | B | C | D            | E           | F        | G     | H                            |
|------|-------------|---|---|--------------|-------------|----------|-------|------------------------------|
| 1684 | rs4236095   | A | G | 0.076196085  | 0.015704151 | 1.93E-06 | 16383 | genus.Parabacteroides.id.954 |
| 1685 | rs115602804 | A | G | 0.10308013   | 0.02227358  | 1.93E-06 | 16394 | genus.Parabacteroides.id.954 |
| 1686 | rs114567323 | C | T | 0.186477784  | 0.040519936 | 5.65E-06 | 5859  | genus.Parabacteroides.id.954 |
| 1687 | rs7298818   | T | C | 0.088883151  | 0.02009019  | 8.54E-06 | 16510 | genus.Parabacteroides.id.954 |
| 1688 | rs6657302   | C | T | -0.104519671 | 0.022552116 | 9.76E-06 | 16552 | genus.Parabacteroides.id.954 |
| 1689 | rs11965579  | C | G | 0.16282395   | 0.038186321 | 8.87E-06 | 3890  | genus.Parabacteroides.id.954 |
| 1690 | rs17141986  | C | G | 0.050030286  | 0.011145925 | 7.27E-06 | 16825 | genus.Parabacteroides.id.954 |
| 1691 | rs72893646  | T | A | -0.071559422 | 0.015666777 | 8.83E-06 | 16508 | genus.Parabacteroides.id.954 |
| 1692 | rs2081023   | G | A | -0.122560702 | 0.023650724 | 2.64E-07 | 7178  | genus.Paraprevotella.id.962  |
| 1693 | rs9602779   | C | A | -0.10669184  | 0.02202635  | 6.93E-07 | 7177  | genus.Paraprevotella.id.962  |
| 1694 | rs140997932 | C | T | -0.162375604 | 0.035417814 | 2.11E-06 | 6187  | genus.Paraprevotella.id.962  |
| 1695 | rs145020347 | G | A | -0.124650032 | 0.026232336 | 4.03E-06 | 6859  | genus.Paraprevotella.id.962  |
| 1696 | rs4767113   | T | C | 0.088246646  | 0.018381962 | 2.14E-06 | 6900  | genus.Paraprevotella.id.962  |
| 1697 | rs3008582   | C | T | 0.105720143  | 0.022724571 | 4.36E-06 | 7175  | genus.Paraprevotella.id.962  |
| 1698 | rs4756632   | T | G | -0.138905488 | 0.028989683 | 3.82E-06 | 7179  | genus.Paraprevotella.id.962  |
| 1699 | rs10842464  | C | T | -0.075821491 | 0.017256778 | 6.60E-06 | 7178  | genus.Paraprevotella.id.962  |
| 1700 | rs3801748   | A | G | 0.077972078  | 0.01716912  | 5.20E-06 | 7179  | genus.Paraprevotella.id.962  |
| 1701 | rs7240324   | G | T | -0.102290408 | 0.022694788 | 5.96E-06 | 6900  | genus.Paraprevotella.id.962  |
| 1702 | rs17109926  | G | A | -0.098833506 | 0.021617178 | 6.75E-06 | 7179  | genus.Paraprevotella.id.962  |
| 1703 | rs17785622  | G | A | 0.248065378  | 0.052430396 | 1.93E-06 | 3288  | genus.Paraprevotella.id.962  |
| 1704 | rs2387977   | C | T | -0.068177776 | 0.013475556 | 5.38E-07 | 11345 | genus.Parasutterella.id.2892 |
| 1705 | rs7572229   | A | G | 0.066272974  | 0.013273581 | 6.32E-07 | 11383 | genus.Parasutterella.id.2892 |
| 1706 | rs35414597  | A | T | -0.068494619 | 0.01421433  | 1.51E-06 | 11386 | genus.Parasutterella.id.2892 |
| 1707 | rs6828768   | T | C | 0.063685185  | 0.013264516 | 1.78E-06 | 11386 | genus.Parasutterella.id.2892 |
| 1708 | rs10899911  | G | A | -0.071710162 | 0.014815144 | 1.15E-06 | 11386 | genus.Parasutterella.id.2892 |
| 1709 | rs7303158   | T | C | 0.064685912  | 0.013425592 | 1.33E-06 | 11386 | genus.Parasutterella.id.2892 |
| 1710 | rs78383039  | C | T | -0.146314647 | 0.029711928 | 1.57E-06 | 9174  | genus.Parasutterella.id.2892 |
| 1711 | rs35055552  | C | T | 0.109554176  | 0.023543268 | 3.35E-06 | 9970  | genus.Parasutterella.id.2892 |
| 1712 | rs2090816   | C | A | 0.084096728  | 0.017731494 | 2.90E-06 | 11385 | genus.Parasutterella.id.2892 |
| 1713 | rs1403396   | T | A | -0.075672871 | 0.015903462 | 2.76E-06 | 11378 | genus.Parasutterella.id.2892 |
| 1714 | rs55877868  | C | A | -0.10445781  | 0.022808932 | 2.87E-06 | 10588 | genus.Parasutterella.id.2892 |
| 1715 | rs8039785   | G | T | 0.061834541  | 0.013300041 | 3.62E-06 | 11383 | genus.Parasutterella.id.2892 |
| 1716 | rs823424    | A | G | -0.071344819 | 0.015695821 | 4.95E-06 | 11386 | genus.Parasutterella.id.2892 |
| 1717 | rs7311004   | C | T | -0.061752212 | 0.01364384  | 5.92E-06 | 11384 | genus.Parasutterella.id.2892 |
| 1718 | rs6809952   | A | G | -0.068495728 | 0.015089156 | 8.13E-06 | 11077 | genus.Parasutterella.id.2892 |
| 1719 | rs11715853  | A | G | -0.066295189 | 0.014611398 | 6.23E-06 | 11386 | genus.Parasutterella.id.2892 |
| 1720 | rs75754569  | G | C | 0.181434144  | 0.031942874 | 1.10E-08 | 5481  | genus.Peptococcus.id.2037    |
| 1721 | rs77681628  | T | C | 0.200307214  | 0.038732756 | 2.69E-07 | 4842  | genus.Peptococcus.id.2037    |
| 1722 | rs10031059  | C | T | -0.121166531 | 0.022584403 | 1.24E-07 | 5526  | genus.Peptococcus.id.2037    |
| 1723 | rs6918730   | A | G | 0.135310568  | 0.028974201 | 1.15E-06 | 5656  | genus.Peptococcus.id.2037    |
| 1724 | rs413827    | A | G | 0.11022947   | 0.023752348 | 3.30E-06 | 5482  | genus.Peptococcus.id.2037    |
| 1725 | rs2054133   | A | G | 0.089543257  | 0.018833153 | 2.14E-06 | 5657  | genus.Peptococcus.id.2037    |
| 1726 | rs11001941  | A | G | -0.195611127 | 0.039221681 | 1.33E-06 | 5607  | genus.Peptococcus.id.2037    |
| 1727 | rs7033353   | G | T | 0.090152001  | 0.018995009 | 2.22E-06 | 5657  | genus.Peptococcus.id.2037    |
| 1728 | rs5770862   | C | T | 0.162017845  | 0.035681339 | 3.22E-06 | 5431  | genus.Peptococcus.id.2037    |
| 1729 | rs34282744  | C | G | 0.19179739   | 0.03998324  | 1.84E-06 | 5257  | genus.Peptococcus.id.2037    |
| 1730 | rs72850165  | C | T | -0.134304018 | 0.030042318 | 5.74E-06 | 5627  | genus.Peptococcus.id.2037    |
| 1731 | rs11030569  | T | A | -0.174020126 | 0.037413336 | 3.13E-06 | 5329  | genus.Peptococcus.id.2037    |
| 1732 | rs7766680   | C | G | 0.09768317   | 0.021415492 | 3.51E-06 | 5655  | genus.Peptococcus.id.2037    |
| 1733 | rs74592222  | A | G | 0.137957011  | 0.030296488 | 8.55E-06 | 5329  | genus.Peptococcus.id.2037    |
| 1734 | rs36121075  | G | A | -0.140670082 | 0.030627993 | 6.99E-06 | 5301  | genus.Peptococcus.id.2037    |

|      | A           | B | C | D            | E           | F        | G     | H                                       |
|------|-------------|---|---|--------------|-------------|----------|-------|-----------------------------------------|
| 1735 | rs12069354  | T | C | 0.167629782  | 0.037950049 | 9.28E-06 | 5352  | genus.Peptococcus.id.2037               |
| 1736 | rs75882962  | C | T | 0.096866054  | 0.019057501 | 3.19E-07 | 10710 | genus.Phascolarctobacterium.id.2168     |
| 1737 | rs56157888  | C | A | 0.095486383  | 0.019397634 | 1.09E-06 | 10031 | genus.Phascolarctobacterium.id.2168     |
| 1738 | rs56069061  | A | G | -0.111305825 | 0.02306943  | 1.87E-06 | 11007 | genus.Phascolarctobacterium.id.2168     |
| 1739 | rs74540770  | A | G | -0.121014393 | 0.025862072 | 3.60E-06 | 9403  | genus.Phascolarctobacterium.id.2168     |
| 1740 | rs76124218  | G | C | -0.159360781 | 0.03445316  | 2.67E-06 | 7314  | genus.Phascolarctobacterium.id.2168     |
| 1741 | rs6427992   | C | G | -0.065245772 | 0.013750826 | 2.09E-06 | 11113 | genus.Phascolarctobacterium.id.2168     |
| 1742 | rs12618201  | G | A | 0.06416571   | 0.013820192 | 3.38E-06 | 11113 | genus.Phascolarctobacterium.id.2168     |
| 1743 | rs74847270  | G | A | -0.104889022 | 0.023099793 | 5.73E-06 | 11098 | genus.Phascolarctobacterium.id.2168     |
| 1744 | rs1264476   | G | T | 0.076733542  | 0.016604148 | 4.30E-06 | 11104 | genus.Phascolarctobacterium.id.2168     |
| 1745 | rs28525131  | A | G | -0.118657158 | 0.026904831 | 8.23E-06 | 10457 | genus.Phascolarctobacterium.id.2168     |
| 1746 | rs7982713   | A | G | 0.072692152  | 0.016320086 | 9.72E-06 | 10710 | genus.Phascolarctobacterium.id.2168     |
| 1747 | rs11929846  | C | T | -0.069719918 | 0.015796922 | 8.88E-06 | 11114 | genus.Phascolarctobacterium.id.2168     |
| 1748 | rs430270    | C | A | 0.13915522   | 0.029705527 | 2.87E-06 | 3318  | genus.Prevotella7.id.11182              |
| 1749 | rs57404562  | A | C | 0.15548647   | 0.031605691 | 6.22E-07 | 3487  | genus.Prevotella7.id.11182              |
| 1750 | rs9959718   | A | G | 0.133012021  | 0.027536133 | 1.90E-06 | 3489  | genus.Prevotella7.id.11182              |
| 1751 | rs9608249   | G | A | -0.158213329 | 0.033631703 | 2.07E-06 | 3482  | genus.Prevotella7.id.11182              |
| 1752 | rs2240542   | T | C | 0.120849888  | 0.026177616 | 4.84E-06 | 3489  | genus.Prevotella7.id.11182              |
| 1753 | rs2918132   | T | C | -0.11464837  | 0.025491556 | 6.42E-06 | 3318  | genus.Prevotella7.id.11182              |
| 1754 | rs16937247  | C | G | 0.146097858  | 0.035152923 | 9.64E-06 | 3486  | genus.Prevotella7.id.11182              |
| 1755 | rs118038478 | G | A | 0.205675553  | 0.046891721 | 7.85E-06 | 3295  | genus.Prevotella7.id.11182              |
| 1756 | rs12124567  | G | A | -0.121281313 | 0.027501731 | 9.49E-06 | 3283  | genus.Prevotella7.id.11182              |
| 1757 | rs12195431  | C | T | 0.196527815  | 0.044232188 | 8.73E-06 | 3489  | genus.Prevotella7.id.11182              |
| 1758 | rs9426434   | C | T | -0.123657205 | 0.027851446 | 9.72E-06 | 3318  | genus.Prevotella7.id.11182              |
| 1759 | rs79263163  | C | A | -0.143981995 | 0.031500978 | 7.51E-06 | 3489  | genus.Prevotella7.id.11182              |
| 1760 | rs111509883 | C | T | 0.171130632  | 0.03476241  | 1.24E-06 | 6960  | genus.Prevotella9.id.11183              |
| 1761 | rs2683313   | G | A | -0.072457582 | 0.015160279 | 1.69E-06 | 10260 | genus.Prevotella9.id.11183              |
| 1762 | rs117271932 | G | A | 0.20808857   | 0.044039277 | 2.82E-06 | 4878  | genus.Prevotella9.id.11183              |
| 1763 | rs10512344  | G | C | 0.247372806  | 0.054408651 | 3.19E-06 | 3063  | genus.Prevotella9.id.11183              |
| 1764 | rs9428102   | G | A | -0.07788445  | 0.017606807 | 4.62E-06 | 10264 | genus.Prevotella9.id.11183              |
| 1765 | rs746764    | C | T | -0.091577152 | 0.019324484 | 2.04E-06 | 9385  | genus.Prevotella9.id.11183              |
| 1766 | rs16966465  | C | G | 0.074334818  | 0.01652906  | 9.33E-06 | 10261 | genus.Prevotella9.id.11183              |
| 1767 | rs2104588   | C | T | 0.105558491  | 0.023773023 | 8.13E-06 | 9268  | genus.Prevotella9.id.11183              |
| 1768 | rs11199734  | T | A | 0.077020901  | 0.016946218 | 7.00E-06 | 10263 | genus.Prevotella9.id.11183              |
| 1769 | rs7232121   | C | G | 0.067129188  | 0.014422959 | 3.76E-06 | 9790  | genus.Prevotella9.id.11183              |
| 1770 | rs11685699  | T | C | -0.141357386 | 0.029566474 | 2.03E-06 | 8342  | genus.Prevotella9.id.11183              |
| 1771 | rs9613013   | A | G | 0.091759081  | 0.020269664 | 6.10E-06 | 9790  | genus.Prevotella9.id.11183              |
| 1772 | rs2495052   | G | A | 0.083897846  | 0.018852315 | 8.97E-06 | 9790  | genus.Prevotella9.id.11183              |
| 1773 | rs72815774  | C | T | -0.176185788 | 0.039306766 | 8.78E-06 | 5728  | genus.Prevotella9.id.11183              |
| 1774 | rs4968431   | T | G | 0.064011283  | 0.014416226 | 8.58E-06 | 10271 | genus.Prevotella9.id.11183              |
| 1775 | rs7976209   | C | T | -0.087078586 | 0.019795052 | 7.28E-06 | 10263 | genus.Prevotella9.id.11183              |
| 1776 | rs12648235  | C | T | 0.078590196  | 0.017767553 | 7.39E-06 | 10271 | genus.Prevotella9.id.11183              |
| 1777 | rs1304512   | A | G | 0.076159345  | 0.016588486 | 5.29E-06 | 9790  | genus.Prevotella9.id.11183              |
| 1778 | rs7237249   | T | C | -0.082376407 | 0.018212594 | 8.93E-06 | 10271 | genus.Prevotella9.id.11183              |
| 1779 | rs2900503   | T | G | -0.172329153 | 0.032667127 | 1.55E-07 | 3320  | genus.RikenellaceaeRC9gutgroup.id.11191 |
| 1780 | rs17582787  | G | A | -0.157739395 | 0.033992444 | 3.55E-06 | 3320  | genus.RikenellaceaeRC9gutgroup.id.11191 |
| 1781 | rs7113155   | C | G | 0.114422634  | 0.024779825 | 5.26E-06 | 3334  | genus.RikenellaceaeRC9gutgroup.id.11191 |
| 1782 | rs4270579   | A | G | -0.118021261 | 0.027104126 | 5.46E-06 | 3331  | genus.RikenellaceaeRC9gutgroup.id.11191 |
| 1783 | rs2998141   | C | T | -0.136346427 | 0.029307262 | 4.42E-06 | 3330  | genus.RikenellaceaeRC9gutgroup.id.11191 |
| 1784 | rs4717843   | T | G | -0.119376102 | 0.026054834 | 4.72E-06 | 3220  | genus.RikenellaceaeRC9gutgroup.id.11191 |
| 1785 | rs9887954   | A | G | -0.114849386 | 0.024901293 | 4.81E-06 | 3330  | genus.RikenellaceaeRC9gutgroup.id.11191 |

|      | A           | B | C | D            | E           | F        | G     | H                                       |
|------|-------------|---|---|--------------|-------------|----------|-------|-----------------------------------------|
| 1786 | rs7193937   | C | G | 0.12415332   | 0.027741031 | 6.19E-06 | 3220  | genus.RikenellaceaeRC9gutgroup.id.11191 |
| 1787 | rs80309088  | A | G | 0.174049957  | 0.038342318 | 4.56E-06 | 3170  | genus.RikenellaceaeRC9gutgroup.id.11191 |
| 1788 | rs12501673  | G | A | 0.116395371  | 0.026225344 | 6.29E-06 | 3334  | genus.RikenellaceaeRC9gutgroup.id.11191 |
| 1789 | rs17032291  | C | T | -0.169578595 | 0.036825126 | 6.61E-06 | 3206  | genus.RikenellaceaeRC9gutgroup.id.11191 |
| 1790 | rs2074881   | C | T | -0.142235956 | 0.032390968 | 9.45E-06 | 3315  | genus.RikenellaceaeRC9gutgroup.id.11191 |
| 1791 | rs7712231   | G | A | 0.156283835  | 0.035046199 | 7.97E-06 | 3334  | genus.RikenellaceaeRC9gutgroup.id.11191 |
| 1792 | rs61841503  | A | G | 0.092887978  | 0.017145406 | 4.00E-08 | 13568 | genus.Romboutsia.id.11347               |
| 1793 | rs10279978  | G | A | -0.062220227 | 0.012767535 | 1.17E-06 | 14143 | genus.Romboutsia.id.11347               |
| 1794 | rs16843578  | T | C | -0.087527594 | 0.019677862 | 5.08E-06 | 14186 | genus.Romboutsia.id.11347               |
| 1795 | rs77702691  | G | A | -0.094405983 | 0.020854443 | 7.37E-06 | 12487 | genus.Romboutsia.id.11347               |
| 1796 | rs75987356  | A | G | -0.129578364 | 0.028045444 | 6.71E-06 | 10466 | genus.Romboutsia.id.11347               |
| 1797 | rs75200530  | G | T | -0.190644379 | 0.042106493 | 5.07E-06 | 5246  | genus.Romboutsia.id.11347               |
| 1798 | rs9567264   | T | C | 0.058001807  | 0.01274947  | 5.76E-06 | 14180 | genus.Romboutsia.id.11347               |
| 1799 | rs34302036  | G | A | 0.055026128  | 0.012083475 | 5.88E-06 | 14185 | genus.Romboutsia.id.11347               |
| 1800 | rs7109293   | G | A | 0.091911164  | 0.020573834 | 6.98E-06 | 14141 | genus.Romboutsia.id.11347               |
| 1801 | rs114398731 | C | G | -0.13103857  | 0.029381546 | 7.96E-06 | 10326 | genus.Romboutsia.id.11347               |
| 1802 | rs28603357  | C | T | -0.214910996 | 0.047473928 | 8.52E-06 | 3693  | genus.Romboutsia.id.11347               |
| 1803 | rs11221428  | C | T | -0.072677936 | 0.015826331 | 6.49E-06 | 14187 | genus.Romboutsia.id.11347               |
| 1804 | rs9389266   | G | T | 0.072281496  | 0.016235341 | 9.38E-06 | 14187 | genus.Romboutsia.id.11347               |
| 1805 | rs62504452  | G | A | -0.071004771 | 0.015665426 | 4.66E-06 | 14178 | genus.Romboutsia.id.11347               |
| 1806 | rs2034589   | C | G | 0.062976455  | 0.012348898 | 5.01E-07 | 17846 | genus.Roseburia.id.2012                 |
| 1807 | rs116270582 | A | T | -0.153843918 | 0.032932399 | 1.20E-06 | 9099  | genus.Roseburia.id.2012                 |
| 1808 | rs2160994   | C | T | 0.055068659  | 0.011248106 | 9.70E-07 | 17444 | genus.Roseburia.id.2012                 |
| 1809 | rs16910295  | C | T | -0.098043368 | 0.020956968 | 2.91E-06 | 16648 | genus.Roseburia.id.2012                 |
| 1810 | rs12740451  | C | T | 0.069752736  | 0.015360737 | 7.34E-06 | 17837 | genus.Roseburia.id.2012                 |
| 1811 | rs6445851   | A | G | -0.04973359  | 0.010815826 | 3.53E-06 | 17851 | genus.Roseburia.id.2012                 |
| 1812 | rs9300744   | T | C | -0.058845175 | 0.012622789 | 4.75E-06 | 17854 | genus.Roseburia.id.2012                 |
| 1813 | rs2943022   | C | T | 0.049378559  | 0.010676336 | 4.11E-06 | 17854 | genus.Roseburia.id.2012                 |
| 1814 | rs6930661   | T | C | -0.096158735 | 0.020497475 | 2.48E-06 | 16945 | genus.Roseburia.id.2012                 |
| 1815 | rs4748237   | C | G | 0.048832628  | 0.010640433 | 4.67E-06 | 17851 | genus.Roseburia.id.2012                 |
| 1816 | rs147990086 | G | A | -0.057893629 | 0.013239999 | 8.93E-06 | 17840 | genus.Roseburia.id.2012                 |
| 1817 | rs329182    | C | T | 0.069032724  | 0.015288408 | 5.90E-06 | 17854 | genus.Roseburia.id.2012                 |
| 1818 | rs302266    | C | T | -0.077731153 | 0.01729852  | 8.13E-06 | 17056 | genus.Roseburia.id.2012                 |
| 1819 | rs75326254  | T | C | -0.104627797 | 0.023089702 | 7.50E-06 | 15893 | genus.Roseburia.id.2012                 |
| 1820 | rs55858165  | C | A | 0.17928439   | 0.040495413 | 9.99E-06 | 5447  | genus.Roseburia.id.2012                 |
| 1821 | rs57466170  | T | C | 0.074140517  | 0.017160095 | 8.30E-06 | 17333 | genus.Roseburia.id.2012                 |
| 1822 | rs78753150  | C | A | 0.096873855  | 0.021406676 | 9.98E-06 | 16303 | genus.Roseburia.id.2012                 |
| 1823 | rs243585    | G | C | -0.058593933 | 0.012101692 | 1.33E-06 | 16906 | genus.Ruminiclostridium5.id.11355       |
| 1824 | rs2286384   | C | G | -0.051881398 | 0.010748225 | 1.44E-06 | 17394 | genus.Ruminiclostridium5.id.11355       |
| 1825 | rs79968837  | G | A | -0.095031084 | 0.019350746 | 1.15E-06 | 16602 | genus.Ruminiclostridium5.id.11355       |
| 1826 | rs2482038   | A | C | 0.051899121  | 0.010877683 | 1.70E-06 | 17396 | genus.Ruminiclostridium5.id.11355       |
| 1827 | rs113753996 | C | T | 0.082068892  | 0.017446254 | 3.99E-06 | 16680 | genus.Ruminiclostridium5.id.11355       |
| 1828 | rs1492620   | C | T | -0.083050484 | 0.018007297 | 3.53E-06 | 17397 | genus.Ruminiclostridium5.id.11355       |
| 1829 | rs2791343   | C | T | 0.051717025  | 0.011336879 | 5.54E-06 | 17392 | genus.Ruminiclostridium5.id.11355       |
| 1830 | rs10827477  | G | A | -0.054738653 | 0.011516344 | 2.19E-06 | 17391 | genus.Ruminiclostridium5.id.11355       |
| 1831 | rs6121460   | A | G | 0.09329552   | 0.019920597 | 2.64E-06 | 17318 | genus.Ruminiclostridium5.id.11355       |
| 1832 | rs2801960   | G | C | 0.052097504  | 0.011511124 | 6.21E-06 | 17387 | genus.Ruminiclostridium5.id.11355       |
| 1833 | rs8053158   | G | A | -0.074054329 | 0.015915101 | 5.90E-06 | 17397 | genus.Ruminiclostridium5.id.11355       |
| 1834 | rs1223978   | C | T | 0.048416888  | 0.010825421 | 8.16E-06 | 17381 | genus.Ruminiclostridium5.id.11355       |
| 1835 | rs73002572  | C | G | 0.181547526  | 0.041407845 | 8.82E-06 | 3761  | genus.Ruminiclostridium5.id.11355       |
| 1836 | rs2833828   | A | G | 0.048961687  | 0.010870209 | 6.82E-06 | 17397 | genus.Ruminiclostridium5.id.11355       |

|      | A           | B | C | D            | E           | F        | G     | H                                          |
|------|-------------|---|---|--------------|-------------|----------|-------|--------------------------------------------|
| 1837 | rs4955951   | G | A | -0.07137494  | 0.01658264  | 9.96E-06 | 17397 | genus.Ruminiclostridium5.id.11355          |
| 1838 | rs1756364   | T | G | 0.099918929  | 0.019716857 | 2.54E-07 | 12933 | genus.Ruminiclostridium6.id.11356          |
| 1839 | rs71414120  | G | T | 0.200894087  | 0.040643398 | 1.08E-06 | 5567  | genus.Ruminiclostridium6.id.11356          |
| 1840 | rs61060922  | G | T | 0.159129692  | 0.032228344 | 1.09E-06 | 8955  | genus.Ruminiclostridium6.id.11356          |
| 1841 | rs79968172  | A | G | 0.116139597  | 0.02430834  | 1.66E-06 | 12802 | genus.Ruminiclostridium6.id.11356          |
| 1842 | rs77193512  | G | A | 0.073653265  | 0.015316349 | 1.30E-06 | 13380 | genus.Ruminiclostridium6.id.11356          |
| 1843 | rs11992182  | C | A | 0.06252993   | 0.013787562 | 4.65E-06 | 13381 | genus.Ruminiclostridium6.id.11356          |
| 1844 | rs72991535  | G | T | 0.135603894  | 0.029517443 | 4.95E-06 | 9642  | genus.Ruminiclostridium6.id.11356          |
| 1845 | rs663262    | C | T | -0.134980385 | 0.03107145  | 3.39E-06 | 7876  | genus.Ruminiclostridium6.id.11356          |
| 1846 | rs9555756   | C | A | -0.080413824 | 0.017669194 | 7.10E-06 | 13369 | genus.Ruminiclostridium6.id.11356          |
| 1847 | rs792058    | A | G | 0.055423396  | 0.012542318 | 8.58E-06 | 12933 | genus.Ruminiclostridium6.id.11356          |
| 1848 | rs10829821  | C | T | -0.097605954 | 0.021607241 | 3.47E-06 | 12802 | genus.Ruminiclostridium6.id.11356          |
| 1849 | rs67479537  | C | T | 0.118994191  | 0.026487011 | 9.30E-06 | 11613 | genus.Ruminiclostridium6.id.11356          |
| 1850 | rs1871858   | G | C | -0.105421541 | 0.023727442 | 9.12E-06 | 12818 | genus.Ruminiclostridium6.id.11356          |
| 1851 | rs116969552 | G | A | -0.166822503 | 0.037668056 | 9.16E-06 | 6824  | genus.Ruminiclostridium6.id.11356          |
| 1852 | rs2548459   | T | C | 0.055486587  | 0.012275456 | 6.40E-06 | 13377 | genus.Ruminiclostridium6.id.11356          |
| 1853 | rs73176030  | C | T | 0.058665044  | 0.013207973 | 7.29E-06 | 13378 | genus.Ruminiclostridium6.id.11356          |
| 1854 | rs35362464  | A | C | 0.072007723  | 0.016538673 | 8.99E-06 | 13308 | genus.Ruminiclostridium6.id.11356          |
| 1855 | rs12040548  | T | G | 0.057042151  | 0.012235891 | 3.15E-06 | 16721 | genus.Ruminiclostridium9.id.11357          |
| 1856 | rs115044523 | A | G | -0.098002558 | 0.020261641 | 2.37E-06 | 16107 | genus.Ruminiclostridium9.id.11357          |
| 1857 | rs12419854  | A | T | -0.072797471 | 0.015559424 | 3.18E-06 | 16027 | genus.Ruminiclostridium9.id.11357          |
| 1858 | rs6082461   | C | A | 0.058642458  | 0.013100394 | 4.87E-06 | 16650 | genus.Ruminiclostridium9.id.11357          |
| 1859 | rs113048721 | G | C | 0.060073481  | 0.013273731 | 4.10E-06 | 16719 | genus.Ruminiclostridium9.id.11357          |
| 1860 | rs918449    | G | A | -0.095090817 | 0.019717682 | 2.56E-06 | 16725 | genus.Ruminiclostridium9.id.11357          |
| 1861 | rs73592673  | T | A | -0.08162902  | 0.016951466 | 2.14E-06 | 15493 | genus.Ruminiclostridium9.id.11357          |
| 1862 | rs79082720  | G | C | 0.092857633  | 0.020487143 | 6.47E-06 | 16094 | genus.Ruminiclostridium9.id.11357          |
| 1863 | rs74303178  | C | T | 0.053274162  | 0.011927361 | 7.92E-06 | 16706 | genus.Ruminiclostridium9.id.11357          |
| 1864 | rs13033315  | A | T | 0.051119464  | 0.011141773 | 5.68E-06 | 16724 | genus.Ruminiclostridium9.id.11357          |
| 1865 | rs9809789   | T | C | -0.071745357 | 0.015967315 | 8.72E-06 | 16025 | genus.Ruminiclostridium9.id.11357          |
| 1866 | rs9522712   | C | T | 0.069972768  | 0.015493905 | 4.66E-06 | 16725 | genus.Ruminiclostridium9.id.11357          |
| 1867 | rs78191726  | C | T | 0.094499761  | 0.02102058  | 7.58E-06 | 16039 | genus.Ruminiclostridium9.id.11357          |
| 1868 | rs7137760   | T | C | 0.050797017  | 0.011218236 | 7.07E-06 | 16722 | genus.Ruminiclostridium9.id.11357          |
| 1869 | rs5994253   | G | A | -0.081130217 | 0.015762089 | 2.35E-07 | 15288 | genus.RuminococcaceaeNK4A214group.id.11358 |
| 1870 | rs136761    | A | G | -0.058752097 | 0.01191547  | 8.15E-07 | 14822 | genus.RuminococcaceaeNK4A214group.id.11358 |
| 1871 | rs11586410  | A | G | -0.086342178 | 0.016993683 | 3.66E-07 | 14822 | genus.RuminococcaceaeNK4A214group.id.11358 |
| 1872 | rs34576931  | C | G | -0.087331196 | 0.019488596 | 4.72E-06 | 14678 | genus.RuminococcaceaeNK4A214group.id.11358 |
| 1873 | rs114244418 | G | C | -0.17526622  | 0.037277927 | 3.59E-06 | 7123  | genus.RuminococcaceaeNK4A214group.id.11358 |
| 1874 | rs4814689   | T | C | -0.108300291 | 0.023070832 | 4.55E-06 | 14009 | genus.RuminococcaceaeNK4A214group.id.11358 |
| 1875 | rs73158814  | G | C | -0.10925732  | 0.022745845 | 2.20E-06 | 13077 | genus.RuminococcaceaeNK4A214group.id.11358 |
| 1876 | rs12731     | G | A | -0.052768427 | 0.01150534  | 4.87E-06 | 15288 | genus.RuminococcaceaeNK4A214group.id.11358 |
| 1877 | rs7573569   | C | T | 0.107738536  | 0.023363816 | 3.23E-06 | 14822 | genus.RuminococcaceaeNK4A214group.id.11358 |
| 1878 | rs147475196 | G | A | -0.133768553 | 0.029519585 | 4.72E-06 | 9917  | genus.RuminococcaceaeNK4A214group.id.11358 |
| 1879 | rs62027366  | C | T | 0.061538935  | 0.013761184 | 6.58E-06 | 14822 | genus.RuminococcaceaeNK4A214group.id.11358 |
| 1880 | rs12642039  | C | T | -0.055300297 | 0.011939746 | 3.43E-06 | 15276 | genus.RuminococcaceaeNK4A214group.id.11358 |
| 1881 | rs35559912  | C | T | -0.092507085 | 0.020367383 | 4.89E-06 | 13976 | genus.RuminococcaceaeNK4A214group.id.11358 |
| 1882 | rs13087692  | G | T | 0.057462316  | 0.012593957 | 8.69E-06 | 15288 | genus.RuminococcaceaeNK4A214group.id.11358 |
| 1883 | rs6681678   | T | C | -0.100174165 | 0.024000023 | 9.05E-06 | 13031 | genus.RuminococcaceaeNK4A214group.id.11358 |
| 1884 | rs11241747  | T | C | 0.053385843  | 0.012003462 | 6.59E-06 | 14822 | genus.RuminococcaceaeNK4A214group.id.11358 |
| 1885 | rs77564310  | C | A | -0.071309265 | 0.014085525 | 3.29E-07 | 17000 | genus.RuminococcaceaeUCG002.id.11360       |
| 1886 | rs55793120  | C | T | 0.137396059  | 0.027413962 | 4.81E-07 | 11669 | genus.RuminococcaceaeUCG002.id.11360       |
| 1887 | rs10927423  | A | C | -0.071361729 | 0.014771224 | 8.50E-07 | 17096 | genus.RuminococcaceaeUCG002.id.11360       |

|      | A           | B | C | D            | E           | F        | G     | H                                    |
|------|-------------|---|---|--------------|-------------|----------|-------|--------------------------------------|
| 1888 | rs67746927  | G | C | -0.054237005 | 0.011035718 | 9.17E-07 | 16651 | genus.RuminococcaceaeUCG002.id.11360 |
| 1889 | rs116974815 | A | C | -0.189730541 | 0.039656625 | 2.03E-06 | 5819  | genus.RuminococcaceaeUCG002.id.11360 |
| 1890 | rs7155595   | A | C | 0.056992918  | 0.011698636 | 1.15E-06 | 17084 | genus.RuminococcaceaeUCG002.id.11360 |
| 1891 | rs7120052   | C | A | 0.062479604  | 0.013552314 | 1.97E-06 | 17097 | genus.RuminococcaceaeUCG002.id.11360 |
| 1892 | rs10916131  | T | C | -0.069333027 | 0.014675325 | 2.87E-06 | 17097 | genus.RuminococcaceaeUCG002.id.11360 |
| 1893 | rs79016051  | T | C | -0.088774672 | 0.018942419 | 2.34E-06 | 16937 | genus.RuminococcaceaeUCG002.id.11360 |
| 1894 | rs12463378  | G | A | -0.052206066 | 0.011208649 | 2.96E-06 | 16994 | genus.RuminococcaceaeUCG002.id.11360 |
| 1895 | rs11750293  | T | G | -0.057830385 | 0.012051229 | 1.76E-06 | 17094 | genus.RuminococcaceaeUCG002.id.11360 |
| 1896 | rs2265670   | G | C | -0.051240397 | 0.010928696 | 2.99E-06 | 17096 | genus.RuminococcaceaeUCG002.id.11360 |
| 1897 | rs15256     | T | C | 0.073237587  | 0.016833997 | 9.46E-06 | 17095 | genus.RuminococcaceaeUCG002.id.11360 |
| 1898 | rs882348    | G | A | -0.079994585 | 0.017861803 | 5.45E-06 | 17097 | genus.RuminococcaceaeUCG002.id.11360 |
| 1899 | rs72874194  | C | G | -0.077028853 | 0.016724954 | 3.47E-06 | 16651 | genus.RuminococcaceaeUCG002.id.11360 |
| 1900 | rs6793778   | T | C | -0.055870572 | 0.012525794 | 9.81E-06 | 17094 | genus.RuminococcaceaeUCG002.id.11360 |
| 1901 | rs7342369   | A | C | -0.052780292 | 0.011602332 | 5.66E-06 | 16651 | genus.RuminococcaceaeUCG002.id.11360 |
| 1902 | rs10964441  | A | G | -0.149060086 | 0.034485997 | 7.45E-06 | 5346  | genus.RuminococcaceaeUCG002.id.11360 |
| 1903 | rs11607472  | G | A | -0.0780229   | 0.017632484 | 7.19E-06 | 16282 | genus.RuminococcaceaeUCG002.id.11360 |
| 1904 | rs7249614   | G | A | -0.049277826 | 0.011080679 | 9.07E-06 | 16651 | genus.RuminococcaceaeUCG002.id.11360 |
| 1905 | rs76847269  | G | A | 0.163508017  | 0.035615077 | 5.17E-06 | 7654  | genus.RuminococcaceaeUCG002.id.11360 |
| 1906 | rs6542556   | G | A | 0.050974014  | 0.011406021 | 7.86E-06 | 17094 | genus.RuminococcaceaeUCG002.id.11360 |
| 1907 | rs57079348  | G | T | -0.07657295  | 0.01728195  | 7.22E-06 | 16372 | genus.RuminococcaceaeUCG002.id.11360 |
| 1908 | rs56030423  | A | G | -0.098287388 | 0.021634426 | 6.30E-06 | 14937 | genus.RuminococcaceaeUCG002.id.11360 |
| 1909 | rs362417    | C | G | -0.054862993 | 0.01209839  | 7.80E-06 | 17097 | genus.RuminococcaceaeUCG002.id.11360 |
| 1910 | rs113147300 | G | A | -0.075841986 | 0.016456212 | 7.69E-06 | 16370 | genus.RuminococcaceaeUCG002.id.11360 |
| 1911 | rs73341549  | C | T | -0.169857156 | 0.031876785 | 1.51E-07 | 6744  | genus.RuminococcaceaeUCG003.id.11361 |
| 1912 | rs6759615   | G | A | 0.10252284   | 0.020020394 | 7.86E-07 | 14410 | genus.RuminococcaceaeUCG003.id.11361 |
| 1913 | rs646327    | A | G | 0.058669624  | 0.01183695  | 7.83E-07 | 14406 | genus.RuminococcaceaeUCG003.id.11361 |
| 1914 | rs11613919  | T | G | 0.072760434  | 0.015571648 | 1.63E-06 | 14309 | genus.RuminococcaceaeUCG003.id.11361 |
| 1915 | rs11243416  | C | T | -0.092565265 | 0.019120311 | 1.67E-06 | 14004 | genus.RuminococcaceaeUCG003.id.11361 |
| 1916 | rs16959793  | C | A | -0.062527033 | 0.013125865 | 2.22E-06 | 14412 | genus.RuminococcaceaeUCG003.id.11361 |
| 1917 | rs4452755   | C | A | -0.06344632  | 0.01347408  | 3.29E-06 | 14406 | genus.RuminococcaceaeUCG003.id.11361 |
| 1918 | rs10490280  | T | C | -0.067209365 | 0.014330937 | 4.16E-06 | 14004 | genus.RuminococcaceaeUCG003.id.11361 |
| 1919 | rs4532474   | A | G | 0.076923106  | 0.017044961 | 4.82E-06 | 14412 | genus.RuminococcaceaeUCG003.id.11361 |
| 1920 | rs4629039   | A | T | 0.055374213  | 0.012265944 | 6.54E-06 | 14404 | genus.RuminococcaceaeUCG003.id.11361 |
| 1921 | rs2523124   | C | T | -0.054662483 | 0.012082341 | 5.78E-06 | 14409 | genus.RuminococcaceaeUCG003.id.11361 |
| 1922 | rs3013089   | A | G | -0.05514734  | 0.012034599 | 4.38E-06 | 14408 | genus.RuminococcaceaeUCG003.id.11361 |
| 1923 | rs78720113  | G | A | -0.115348392 | 0.02496006  | 7.59E-06 | 13078 | genus.RuminococcaceaeUCG003.id.11361 |
| 1924 | rs139730    | C | G | -0.057765528 | 0.013064482 | 9.72E-06 | 14004 | genus.RuminococcaceaeUCG003.id.11361 |
| 1925 | rs6769553   | G | A | 0.084974255  | 0.015745058 | 7.91E-08 | 9501  | genus.RuminococcaceaeUCG004.id.11362 |
| 1926 | rs12125734  | T | G | 0.133971622  | 0.02574165  | 2.09E-07 | 8938  | genus.RuminococcaceaeUCG004.id.11362 |
| 1927 | rs511258    | A | G | -0.075747368 | 0.016247466 | 4.52E-06 | 9500  | genus.RuminococcaceaeUCG004.id.11362 |
| 1928 | rs2248146   | C | T | 0.068945165  | 0.015364919 | 8.20E-06 | 9502  | genus.RuminococcaceaeUCG004.id.11362 |
| 1929 | rs10976229  | G | T | 0.095975994  | 0.021455386 | 7.04E-06 | 9116  | genus.RuminococcaceaeUCG004.id.11362 |
| 1930 | rs7569771   | G | A | -0.075914029 | 0.01703081  | 8.12E-06 | 9502  | genus.RuminococcaceaeUCG004.id.11362 |
| 1931 | rs872501    | A | G | 0.116124682  | 0.025946001 | 5.81E-06 | 8473  | genus.RuminococcaceaeUCG004.id.11362 |
| 1932 | rs550351    | C | A | 0.078587023  | 0.018003041 | 9.43E-06 | 9498  | genus.RuminococcaceaeUCG004.id.11362 |
| 1933 | rs3800154   | C | A | -0.079795901 | 0.017763932 | 6.12E-06 | 9406  | genus.RuminococcaceaeUCG004.id.11362 |
| 1934 | rs11961899  | A | G | -0.070782539 | 0.01613814  | 9.18E-06 | 9501  | genus.RuminococcaceaeUCG004.id.11362 |
| 1935 | rs9818949   | T | G | 0.085992665  | 0.018867146 | 5.39E-06 | 9116  | genus.RuminococcaceaeUCG004.id.11362 |
| 1936 | rs7123615   | G | C | -0.07861572  | 0.017959154 | 7.09E-06 | 9502  | genus.RuminococcaceaeUCG004.id.11362 |
| 1937 | rs10950694  | C | T | 0.057762846  | 0.011412014 | 4.30E-07 | 15821 | genus.RuminococcaceaeUCG005.id.11363 |
| 1938 | rs34781347  | A | G | 0.188684782  | 0.03864836  | 6.05E-07 | 6061  | genus.RuminococcaceaeUCG005.id.11363 |

|      | A           | B | C | D            | E           | F        | G     | H                                    |
|------|-------------|---|---|--------------|-------------|----------|-------|--------------------------------------|
| 1939 | rs12288512  | G | A | 0.066635035  | 0.014435565 | 3.10E-06 | 15473 | genus.RuminococcaceaeUCG005.id.11363 |
| 1940 | rs60081663  | G | C | 0.158081538  | 0.031958601 | 9.28E-07 | 9342  | genus.RuminococcaceaeUCG005.id.11363 |
| 1941 | rs114279581 | G | A | -0.146604207 | 0.031603425 | 3.22E-06 | 8465  | genus.RuminococcaceaeUCG005.id.11363 |
| 1942 | rs12458218  | C | T | 0.067732182  | 0.014452491 | 2.41E-06 | 16099 | genus.RuminococcaceaeUCG005.id.11363 |
| 1943 | rs35166120  | G | C | -0.068615325 | 0.014625203 | 3.75E-06 | 16092 | genus.RuminococcaceaeUCG005.id.11363 |
| 1944 | rs7555878   | G | A | 0.058667737  | 0.012527736 | 2.81E-06 | 16100 | genus.RuminococcaceaeUCG005.id.11363 |
| 1945 | rs394449    | T | A | 0.069290871  | 0.014871206 | 2.60E-06 | 15728 | genus.RuminococcaceaeUCG005.id.11363 |
| 1946 | rs10873449  | C | T | 0.06548432   | 0.01439735  | 4.11E-06 | 16098 | genus.RuminococcaceaeUCG005.id.11363 |
| 1947 | rs2893871   | A | G | -0.073643982 | 0.015547986 | 3.54E-06 | 16103 | genus.RuminococcaceaeUCG005.id.11363 |
| 1948 | rs72776570  | A | C | 0.087067007  | 0.019717899 | 5.36E-06 | 15376 | genus.RuminococcaceaeUCG005.id.11363 |
| 1949 | rs898577    | C | T | -0.12301218  | 0.028667054 | 7.46E-06 | 9991  | genus.RuminococcaceaeUCG005.id.11363 |
| 1950 | rs7449320   | A | C | 0.059916334  | 0.013083635 | 4.81E-06 | 16095 | genus.RuminococcaceaeUCG005.id.11363 |
| 1951 | rs10937802  | A | G | 0.075581108  | 0.016822622 | 8.17E-06 | 15821 | genus.RuminococcaceaeUCG005.id.11363 |
| 1952 | rs7586445   | A | G | 0.07823492   | 0.017645763 | 8.81E-06 | 15099 | genus.RuminococcaceaeUCG005.id.11363 |
| 1953 | rs55793120  | C | T | 0.121547709  | 0.0279546   | 7.37E-06 | 11224 | genus.RuminococcaceaeUCG005.id.11363 |
| 1954 | rs8009993   | C | G | -0.135936179 | 0.024485659 | 4.42E-08 | 7389  | genus.RuminococcaceaeUCG009.id.11366 |
| 1955 | rs1550196   | A | G | 0.130841508  | 0.026247787 | 1.13E-06 | 7389  | genus.RuminococcaceaeUCG009.id.11366 |
| 1956 | rs4708333   | G | T | -0.084032963 | 0.017475702 | 1.56E-06 | 7511  | genus.RuminococcaceaeUCG009.id.11366 |
| 1957 | rs61779334  | C | G | -0.138137216 | 0.029207242 | 1.94E-06 | 6865  | genus.RuminococcaceaeUCG009.id.11366 |
| 1958 | rs4079028   | T | C | 0.091562303  | 0.019936034 | 3.28E-06 | 7480  | genus.RuminococcaceaeUCG009.id.11366 |
| 1959 | rs2058609   | G | A | 0.081646419  | 0.017471971 | 3.12E-06 | 7510  | genus.RuminococcaceaeUCG009.id.11366 |
| 1960 | rs12508214  | T | C | -0.077464871 | 0.016893699 | 4.75E-06 | 7511  | genus.RuminococcaceaeUCG009.id.11366 |
| 1961 | rs9558661   | C | T | -0.089782261 | 0.020073862 | 7.01E-06 | 7480  | genus.RuminococcaceaeUCG009.id.11366 |
| 1962 | rs758191    | G | T | 0.177019514  | 0.037511304 | 9.01E-06 | 5829  | genus.RuminococcaceaeUCG009.id.11366 |
| 1963 | rs2192926   | G | A | -0.089048031 | 0.019298901 | 4.88E-06 | 7511  | genus.RuminococcaceaeUCG009.id.11366 |
| 1964 | rs113006825 | C | T | -0.092889294 | 0.020803474 | 7.98E-06 | 7165  | genus.RuminococcaceaeUCG009.id.11366 |
| 1965 | rs138460696 | G | A | 0.13927429   | 0.031579435 | 9.81E-06 | 6865  | genus.RuminococcaceaeUCG009.id.11366 |
| 1966 | rs6952765   | A | G | 0.073209862  | 0.016677682 | 8.13E-06 | 7511  | genus.RuminococcaceaeUCG009.id.11366 |
| 1967 | rs78410648  | G | A | 0.120988897  | 0.027731677 | 9.67E-06 | 7510  | genus.RuminococcaceaeUCG009.id.11366 |
| 1968 | rs35506912  | C | G | -0.069374287 | 0.014792554 | 3.21E-06 | 12793 | genus.RuminococcaceaeUCG010.id.11367 |
| 1969 | rs682403    | G | A | -0.058816059 | 0.01246713  | 2.37E-06 | 12864 | genus.RuminococcaceaeUCG010.id.11367 |
| 1970 | rs6958419   | T | C | -0.058571831 | 0.012499376 | 2.84E-06 | 12870 | genus.RuminococcaceaeUCG010.id.11367 |
| 1971 | rs2820282   | C | A | -0.059230421 | 0.012591704 | 2.85E-06 | 12865 | genus.RuminococcaceaeUCG010.id.11367 |
| 1972 | rs12597105  | A | G | 0.067085456  | 0.014441482 | 4.87E-06 | 12415 | genus.RuminococcaceaeUCG010.id.11367 |
| 1973 | rs7935775   | T | A | -0.063135075 | 0.013795347 | 4.99E-06 | 12864 | genus.RuminococcaceaeUCG010.id.11367 |
| 1974 | rs73218807  | A | G | -0.166210686 | 0.036793834 | 6.43E-06 | 6714  | genus.RuminococcaceaeUCG010.id.11367 |
| 1975 | rs7441445   | T | C | -0.056949974 | 0.012650232 | 6.80E-06 | 12852 | genus.RuminococcaceaeUCG010.id.11367 |
| 1976 | rs1416041   | C | A | -0.182339224 | 0.033989816 | 7.04E-08 | 3632  | genus.RuminococcaceaeUCG011.id.11368 |
| 1977 | rs12724320  | T | C | -0.120880657 | 0.024922917 | 1.52E-06 | 3632  | genus.RuminococcaceaeUCG011.id.11368 |
| 1978 | rs79113084  | T | C | -0.152165548 | 0.031751932 | 2.06E-06 | 3610  | genus.RuminococcaceaeUCG011.id.11368 |
| 1979 | rs9729514   | G | A | 0.18493353   | 0.039461636 | 2.37E-06 | 3632  | genus.RuminococcaceaeUCG011.id.11368 |
| 1980 | rs2729556   | T | C | -0.109096996 | 0.023369889 | 3.19E-06 | 3632  | genus.RuminococcaceaeUCG011.id.11368 |
| 1981 | rs10274562  | T | C | 0.11091724   | 0.024455551 | 6.50E-06 | 3632  | genus.RuminococcaceaeUCG011.id.11368 |
| 1982 | rs4490371   | C | T | -0.111816319 | 0.024896269 | 7.75E-06 | 3610  | genus.RuminococcaceaeUCG011.id.11368 |
| 1983 | rs12781711  | T | C | -0.065612917 | 0.011747657 | 2.55E-08 | 16772 | genus.RuminococcaceaeUCG013.id.11370 |
| 1984 | rs12189346  | A | G | 0.068496125  | 0.014558037 | 1.68E-06 | 16470 | genus.RuminococcaceaeUCG013.id.11370 |
| 1985 | rs75088940  | C | T | -0.094296811 | 0.02007125  | 2.55E-06 | 15638 | genus.RuminococcaceaeUCG013.id.11370 |
| 1986 | rs16918863  | C | A | 0.111491182  | 0.024015687 | 4.16E-06 | 12643 | genus.RuminococcaceaeUCG013.id.11370 |
| 1987 | rs76973485  | T | G | 0.194975714  | 0.041821342 | 3.35E-06 | 5299  | genus.RuminococcaceaeUCG013.id.11370 |
| 1988 | rs12485353  | A | G | -0.060790269 | 0.013084699 | 4.19E-06 | 16771 | genus.RuminococcaceaeUCG013.id.11370 |
| 1989 | rs9565219   | A | T | -0.052459177 | 0.011770144 | 8.73E-06 | 16772 | genus.RuminococcaceaeUCG013.id.11370 |

|      | A           | B | C | D            | E           | F        | G     | H                                    |
|------|-------------|---|---|--------------|-------------|----------|-------|--------------------------------------|
| 1990 | rs1729063   | C | G | -0.053341105 | 0.01207565  | 9.64E-06 | 16470 | genus.RuminococcaceaeUCG013.id.11370 |
| 1991 | rs7784330   | A | G | -0.049832949 | 0.011206613 | 8.16E-06 | 16770 | genus.RuminococcaceaeUCG013.id.11370 |
| 1992 | rs11581881  | T | C | 0.066121072  | 0.014473649 | 4.73E-06 | 15730 | genus.RuminococcaceaeUCG013.id.11370 |
| 1993 | rs2428106   | G | C | -0.0490863   | 0.010990264 | 8.38E-06 | 16768 | genus.RuminococcaceaeUCG013.id.11370 |
| 1994 | rs2730183   | A | G | -0.048869155 | 0.010990742 | 8.44E-06 | 16772 | genus.RuminococcaceaeUCG013.id.11370 |
| 1995 | rs9313055   | C | T | 0.105087207  | 0.023446005 | 9.55E-06 | 15764 | genus.RuminococcaceaeUCG013.id.11370 |
| 1996 | rs12336782  | C | T | -0.085604658 | 0.018931084 | 8.60E-06 | 16772 | genus.RuminococcaceaeUCG013.id.11370 |
| 1997 | rs4385846   | T | G | 0.05984045   | 0.013180685 | 6.46E-06 | 16772 | genus.RuminococcaceaeUCG013.id.11370 |
| 1998 | rs115777838 | C | T | -0.188349525 | 0.038664295 | 4.62E-07 | 5674  | genus.RuminococcaceaeUCG014.id.11371 |
| 1999 | rs72809222  | C | T | 0.067177506  | 0.013983796 | 2.41E-06 | 13922 | genus.RuminococcaceaeUCG014.id.11371 |
| 2000 | rs12638134  | G | T | 0.058254795  | 0.011965732 | 1.21E-06 | 14403 | genus.RuminococcaceaeUCG014.id.11371 |
| 2001 | rs56105232  | A | G | 0.139275689  | 0.029913177 | 2.91E-06 | 9190  | genus.RuminococcaceaeUCG014.id.11371 |
| 2002 | rs995642    | T | C | 0.060047967  | 0.012641687 | 1.90E-06 | 14402 | genus.RuminococcaceaeUCG014.id.11371 |
| 2003 | rs10941294  | T | C | -0.122057405 | 0.026001669 | 2.40E-06 | 12615 | genus.RuminococcaceaeUCG014.id.11371 |
| 2004 | rs79640386  | A | T | -0.110863476 | 0.024809787 | 8.74E-06 | 13692 | genus.RuminococcaceaeUCG014.id.11371 |
| 2005 | rs439810    | C | G | -0.057712693 | 0.012667538 | 7.04E-06 | 14403 | genus.RuminococcaceaeUCG014.id.11371 |
| 2006 | rs10495392  | T | C | -0.082485954 | 0.018719441 | 9.96E-06 | 13902 | genus.RuminococcaceaeUCG014.id.11371 |
| 2007 | rs62478832  | A | T | -0.058128986 | 0.012903031 | 6.04E-06 | 14331 | genus.RuminococcaceaeUCG014.id.11371 |
| 2008 | rs61898819  | T | A | 0.060786464  | 0.01387607  | 9.92E-06 | 14325 | genus.RuminococcaceaeUCG014.id.11371 |
| 2009 | rs853612    | G | A | -0.05282572  | 0.011936668 | 9.75E-06 | 14403 | genus.RuminococcaceaeUCG014.id.11371 |
| 2010 | rs73186226  | A | G | -0.099385194 | 0.02168186  | 6.72E-06 | 13760 | genus.RuminococcaceaeUCG014.id.11371 |
| 2011 | rs34402072  | T | C | -0.068802318 | 0.015608285 | 9.80E-06 | 13863 | genus.RuminococcaceaeUCG014.id.11371 |
| 2012 | rs74060145  | G | C | -0.115766761 | 0.025419855 | 8.71E-06 | 13011 | genus.RuminococcaceaeUCG014.id.11371 |
| 2013 | rs77627087  | G | C | 0.067561994  | 0.015010339 | 7.43E-06 | 14390 | genus.RuminococcaceaeUCG014.id.11371 |
| 2014 | rs17296933  | G | C | -0.08295439  | 0.018505763 | 7.34E-06 | 13177 | genus.RuminococcaceaeUCG014.id.11371 |
| 2015 | rs10791168  | G | A | -0.066462357 | 0.015006876 | 9.76E-06 | 14403 | genus.RuminococcaceaeUCG014.id.11371 |
| 2016 | rs10769159  | C | G | -0.064027674 | 0.011005922 | 5.29E-09 | 16603 | genus.Ruminococcus1.id.11373         |
| 2017 | rs7117576   | G | A | 0.082950453  | 0.017089133 | 6.48E-07 | 16606 | genus.Ruminococcus1.id.11373         |
| 2018 | rs17781867  | T | C | 0.099927121  | 0.021172816 | 1.96E-06 | 14349 | genus.Ruminococcus1.id.11373         |
| 2019 | rs7583465   | T | C | 0.052765423  | 0.011261892 | 2.56E-06 | 16588 | genus.Ruminococcus1.id.11373         |
| 2020 | rs78613526  | A | G | 0.167496641  | 0.036763917 | 5.11E-06 | 7266  | genus.Ruminococcus1.id.11373         |
| 2021 | rs78572139  | A | G | 0.1250377    | 0.027941129 | 5.23E-06 | 11667 | genus.Ruminococcus1.id.11373         |
| 2022 | rs3000856   | A | T | -0.070999702 | 0.016276599 | 9.28E-06 | 16126 | genus.Ruminococcus1.id.11373         |
| 2023 | rs6493760   | T | C | 0.053526195  | 0.011588457 | 3.38E-06 | 16126 | genus.Ruminococcus1.id.11373         |
| 2024 | rs11783695  | T | G | -0.07341143  | 0.016139812 | 4.73E-06 | 16606 | genus.Ruminococcus1.id.11373         |
| 2025 | rs10995816  | G | C | -0.07620021  | 0.017468886 | 8.38E-06 | 16597 | genus.Ruminococcus1.id.11373         |
| 2026 | rs10167839  | G | A | 0.051950897  | 0.011630648 | 8.09E-06 | 16605 | genus.Ruminococcus1.id.11373         |
| 2027 | rs3819978   | T | C | -0.115039796 | 0.026013681 | 8.74E-06 | 12769 | genus.Ruminococcus1.id.11373         |
| 2028 | rs4849717   | A | T | 0.132763838  | 0.029981613 | 8.83E-06 | 10484 | genus.Ruminococcus1.id.11373         |
| 2029 | rs6105066   | C | T | -0.060705188 | 0.01342499  | 5.06E-06 | 16049 | genus.Ruminococcus1.id.11373         |
| 2030 | rs78120384  | G | A | -0.192815497 | 0.039204507 | 3.31E-07 | 6082  | genus.Ruminococcus2.id.11374         |
| 2031 | rs12986628  | T | C | 0.066593727  | 0.014016808 | 2.14E-06 | 14714 | genus.Ruminococcus2.id.11374         |
| 2032 | rs7635831   | A | G | 0.061834357  | 0.012903108 | 1.98E-06 | 14924 | genus.Ruminococcus2.id.11374         |
| 2033 | rs2997412   | G | A | -0.056843902 | 0.012232461 | 4.22E-06 | 15336 | genus.Ruminococcus2.id.11374         |
| 2034 | rs2368224   | G | T | 0.199647633  | 0.043845344 | 3.63E-06 | 3026  | genus.Ruminococcus2.id.11374         |
| 2035 | rs4400279   | G | A | 0.05461138   | 0.012007747 | 5.80E-06 | 15333 | genus.Ruminococcus2.id.11374         |
| 2036 | rs58681734  | G | A | 0.07238752   | 0.016078702 | 4.18E-06 | 15338 | genus.Ruminococcus2.id.11374         |
| 2037 | rs1819812   | T | G | 0.084235642  | 0.018489341 | 5.28E-06 | 14868 | genus.Ruminococcus2.id.11374         |
| 2038 | rs12406309  | C | A | -0.063192979 | 0.014227548 | 9.79E-06 | 15339 | genus.Ruminococcus2.id.11374         |
| 2039 | rs2846589   | T | G | 0.052209321  | 0.011638161 | 7.59E-06 | 14924 | genus.Ruminococcus2.id.11374         |
| 2040 | rs55707116  | A | C | 0.08655215   | 0.01891409  | 8.01E-06 | 15336 | genus.Ruminococcus2.id.11374         |

|      | A           | B | C | D            | E           | F        | G     | H                               |
|------|-------------|---|---|--------------|-------------|----------|-------|---------------------------------|
| 2041 | rs75140805  | G | T | 0.083682495  | 0.017644509 | 3.95E-06 | 14249 | genus.Ruminococcus2.id.11374    |
| 2042 | rs4799823   | T | C | 0.083700126  | 0.018226258 | 5.40E-06 | 14650 | genus.Ruminococcus2.id.11374    |
| 2043 | rs61791565  | C | T | -0.052350302 | 0.011711882 | 6.79E-06 | 15319 | genus.Ruminococcus2.id.11374    |
| 2044 | rs7693984   | A | G | -0.102821803 | 0.023508663 | 9.42E-06 | 14154 | genus.Ruminococcus2.id.11374    |
| 2045 | rs13417181  | C | T | 0.166509314  | 0.033752138 | 7.62E-07 | 3047  | genus.Sellimonas.id.14369       |
| 2046 | rs2371572   | C | A | 0.127348939  | 0.025086238 | 4.46E-07 | 3154  | genus.Sellimonas.id.14369       |
| 2047 | rs113379006 | C | T | -0.162758788 | 0.035702495 | 7.21E-06 | 3154  | genus.Sellimonas.id.14369       |
| 2048 | rs2187447   | C | A | 0.243457117  | 0.052769543 | 3.98E-06 | 3028  | genus.Sellimonas.id.14369       |
| 2049 | rs2016057   | C | A | -0.125877526 | 0.02561532  | 1.03E-06 | 3154  | genus.Sellimonas.id.14369       |
| 2050 | rs72553859  | C | G | -0.150458067 | 0.033262641 | 5.38E-06 | 3154  | genus.Sellimonas.id.14369       |
| 2051 | rs56203279  | C | T | -0.124045002 | 0.026911497 | 3.72E-06 | 3154  | genus.Sellimonas.id.14369       |
| 2052 | rs553697    | C | T | -0.153767275 | 0.033909892 | 6.13E-06 | 3047  | genus.Sellimonas.id.14369       |
| 2053 | rs7968030   | T | A | -0.127110283 | 0.028061737 | 5.56E-06 | 3095  | genus.Sellimonas.id.14369       |
| 2054 | rs4600608   | G | A | -0.137151754 | 0.03017017  | 4.95E-06 | 3095  | genus.Sellimonas.id.14369       |
| 2055 | rs41816     | G | A | 0.132201227  | 0.029108726 | 8.39E-06 | 3154  | genus.Sellimonas.id.14369       |
| 2056 | rs11787826  | A | C | 0.081327043  | 0.017115415 | 2.63E-06 | 6923  | genus.Senegalimassilia.id.11160 |
| 2057 | rs72887800  | A | T | -0.082246156 | 0.017572066 | 2.42E-06 | 6923  | genus.Senegalimassilia.id.11160 |
| 2058 | rs7225245   | A | G | 0.079173009  | 0.017042101 | 4.18E-06 | 6923  | genus.Senegalimassilia.id.11160 |
| 2059 | rs57512504  | A | T | 0.081949442  | 0.017224097 | 2.03E-06 | 6923  | genus.Senegalimassilia.id.11160 |
| 2060 | rs10036909  | T | C | 0.185519381  | 0.040088092 | 8.05E-06 | 4996  | genus.Senegalimassilia.id.11160 |
| 2061 | rs13383270  | C | G | 0.077467918  | 0.017084039 | 6.04E-06 | 6923  | genus.Senegalimassilia.id.11160 |
| 2062 | rs1990708   | C | A | -0.109619487 | 0.024778524 | 8.91E-06 | 6923  | genus.Senegalimassilia.id.11160 |
| 2063 | rs2017373   | T | C | 0.078225822  | 0.017684094 | 9.50E-06 | 6923  | genus.Senegalimassilia.id.11160 |
| 2064 | rs8901      | T | C | 0.093459378  | 0.018681296 | 6.07E-07 | 6063  | genus.Slackia.id.825            |
| 2065 | rs4492265   | G | A | -0.0905757   | 0.019165844 | 2.41E-06 | 6063  | genus.Slackia.id.825            |
| 2066 | rs16894137  | T | C | -0.12279207  | 0.026304664 | 2.71E-06 | 6063  | genus.Slackia.id.825            |
| 2067 | rs112764253 | A | T | 0.194713531  | 0.041159784 | 3.40E-06 | 5634  | genus.Slackia.id.825            |
| 2068 | rs12440440  | G | A | 0.090193357  | 0.019058248 | 2.63E-06 | 6063  | genus.Slackia.id.825            |
| 2069 | rs35156985  | C | T | -0.155708877 | 0.034808468 | 8.06E-06 | 5965  | genus.Slackia.id.825            |
| 2070 | rs10409783  | G | A | 0.095082845  | 0.021123946 | 7.70E-06 | 5941  | genus.Slackia.id.825            |
| 2071 | rs13339230  | G | C | 0.147054846  | 0.033063509 | 7.42E-06 | 6063  | genus.Slackia.id.825            |
| 2072 | rs58767323  | C | G | -0.102833438 | 0.022707713 | 4.60E-06 | 6063  | genus.Slackia.id.825            |
| 2073 | rs11110281  | C | T | -0.137518884 | 0.022739814 | 2.58E-09 | 15120 | genus.Streptococcus.id.1853     |
| 2074 | rs4968759   | G | A | -0.051510944 | 0.011206836 | 3.78E-06 | 16384 | genus.Streptococcus.id.1853     |
| 2075 | rs11764382  | G | A | -0.06953447  | 0.014367132 | 1.29E-06 | 16387 | genus.Streptococcus.id.1853     |
| 2076 | rs72739637  | G | A | 0.095994182  | 0.019321261 | 1.03E-06 | 14920 | genus.Streptococcus.id.1853     |
| 2077 | rs1918540   | A | G | 0.059639038  | 0.012814811 | 2.44E-06 | 16373 | genus.Streptococcus.id.1853     |
| 2078 | rs17708276  | G | A | -0.079395519 | 0.017062753 | 3.04E-06 | 16278 | genus.Streptococcus.id.1853     |
| 2079 | rs11720390  | A | G | 0.107023904  | 0.022812145 | 3.59E-06 | 15220 | genus.Streptococcus.id.1853     |
| 2080 | rs395407    | C | G | -0.079278061 | 0.01736973  | 4.37E-06 | 15864 | genus.Streptococcus.id.1853     |
| 2081 | rs10448310  | G | A | -0.051793473 | 0.011132356 | 3.31E-06 | 16384 | genus.Streptococcus.id.1853     |
| 2082 | rs7916711   | G | A | 0.102890941  | 0.021736227 | 2.72E-06 | 15294 | genus.Streptococcus.id.1853     |
| 2083 | rs71481756  | G | T | 0.09310478   | 0.020794918 | 6.51E-06 | 14526 | genus.Streptococcus.id.1853     |
| 2084 | rs2370083   | T | G | -0.081683584 | 0.018585095 | 9.75E-06 | 16277 | genus.Streptococcus.id.1853     |
| 2085 | rs10028567  | T | C | -0.092116652 | 0.019188114 | 7.30E-06 | 16311 | genus.Streptococcus.id.1853     |
| 2086 | rs6806351   | C | T | -0.063382863 | 0.013664741 | 4.94E-06 | 15973 | genus.Streptococcus.id.1853     |
| 2087 | rs57646748  | A | G | -0.090769573 | 0.020034438 | 5.48E-06 | 15939 | genus.Streptococcus.id.1853     |
| 2088 | rs9903102   | A | C | -0.070948345 | 0.015527498 | 4.18E-06 | 16384 | genus.Streptococcus.id.1853     |
| 2089 | rs6563952   | C | G | 0.082734414  | 0.018003533 | 5.82E-06 | 16387 | genus.Streptococcus.id.1853     |
| 2090 | rs12638227  | C | G | -0.055728761 | 0.010855202 | 2.48E-07 | 17165 | genus.Subdoligranulum.id.2070   |
| 2091 | rs10065321  | C | T | -0.051282785 | 0.010810523 | 2.10E-06 | 17589 | genus.Subdoligranulum.id.2070   |

|      | A           | B | C | D            | E           | F        | G     | H                               |
|------|-------------|---|---|--------------|-------------|----------|-------|---------------------------------|
| 2092 | rs4347804   | G | A | 0.166063165  | 0.035748326 | 2.18E-06 | 4312  | genus.Subdoligranulum.id.2070   |
| 2093 | rs6555306   | C | T | -0.074077668 | 0.015546287 | 2.81E-06 | 17591 | genus.Subdoligranulum.id.2070   |
| 2094 | rs3761728   | G | T | -0.054345782 | 0.011886608 | 3.87E-06 | 17570 | genus.Subdoligranulum.id.2070   |
| 2095 | rs2114677   | T | C | -0.104176347 | 0.023082878 | 2.72E-06 | 15566 | genus.Subdoligranulum.id.2070   |
| 2096 | rs75158211  | C | T | -0.07234304  | 0.015933044 | 7.52E-06 | 17165 | genus.Subdoligranulum.id.2070   |
| 2097 | rs2171249   | T | C | 0.10674366   | 0.023321252 | 4.51E-06 | 14679 | genus.Subdoligranulum.id.2070   |
| 2098 | rs35940633  | A | G | -0.051100832 | 0.011001029 | 4.22E-06 | 17582 | genus.Subdoligranulum.id.2070   |
| 2099 | rs76528319  | T | G | -0.143278588 | 0.031066225 | 7.41E-06 | 8468  | genus.Subdoligranulum.id.2070   |
| 2100 | rs1667315   | A | G | 0.0485017    | 0.010745207 | 6.72E-06 | 17586 | genus.Subdoligranulum.id.2070   |
| 2101 | rs76664262  | A | T | 0.083407827  | 0.018535669 | 4.87E-06 | 16712 | genus.Subdoligranulum.id.2070   |
| 2102 | rs10497836  | T | C | -0.052406498 | 0.011869733 | 8.38E-06 | 17579 | genus.Subdoligranulum.id.2070   |
| 2103 | rs16962433  | T | A | 0.085599862  | 0.018921315 | 7.65E-06 | 15857 | genus.Subdoligranulum.id.2070   |
| 2104 | rs13173038  | G | A | -0.071807564 | 0.015162698 | 2.73E-06 | 13245 | genus.Sutterella.id.2896        |
| 2105 | rs2321387   | A | G | -0.059287622 | 0.012450922 | 1.87E-06 | 13252 | genus.Sutterella.id.2896        |
| 2106 | rs7499539   | G | A | 0.061747829  | 0.013099845 | 2.36E-06 | 13254 | genus.Sutterella.id.2896        |
| 2107 | rs62501473  | A | G | 0.069423259  | 0.014941649 | 5.52E-06 | 12762 | genus.Sutterella.id.2896        |
| 2108 | rs143438747 | C | T | -0.145792693 | 0.030686706 | 3.28E-06 | 9368  | genus.Sutterella.id.2896        |
| 2109 | rs9350083   | G | T | -0.059306886 | 0.013392944 | 8.23E-06 | 13254 | genus.Sutterella.id.2896        |
| 2110 | rs7638039   | C | T | 0.064562374  | 0.014388651 | 8.66E-06 | 13236 | genus.Sutterella.id.2896        |
| 2111 | rs11591622  | G | T | -0.0688382   | 0.015137492 | 6.50E-06 | 12604 | genus.Sutterella.id.2896        |
| 2112 | rs2613606   | T | C | -0.055679377 | 0.012411747 | 7.20E-06 | 13249 | genus.Sutterella.id.2896        |
| 2113 | rs1145877   | G | A | -0.073548024 | 0.016241333 | 7.20E-06 | 13251 | genus.Sutterella.id.2896        |
| 2114 | rs607327    | T | C | 0.057833353  | 0.012905264 | 6.63E-06 | 13251 | genus.Sutterella.id.2896        |
| 2115 | rs2050185   | A | G | 0.057513842  | 0.012876636 | 7.97E-06 | 13243 | genus.Sutterella.id.2896        |
| 2116 | rs1883097   | T | C | 0.226398815  | 0.045464179 | 4.16E-07 | 4417  | genus.Terrisporobacter.id.11348 |
| 2117 | rs2569953   | C | A | -0.077559072 | 0.01746408  | 8.95E-06 | 6637  | genus.Terrisporobacter.id.11348 |
| 2118 | rs7184125   | C | T | 0.091256006  | 0.020549332 | 8.48E-06 | 6232  | genus.Terrisporobacter.id.11348 |
| 2119 | rs2872237   | A | C | -0.08145049  | 0.017594312 | 3.97E-06 | 6632  | genus.Terrisporobacter.id.11348 |
| 2120 | rs58405430  | T | G | 0.134617158  | 0.030117736 | 7.94E-06 | 6176  | genus.Terrisporobacter.id.11348 |
| 2121 | rs7034891   | C | G | -0.079920945 | 0.01737936  | 4.54E-06 | 6629  | genus.Terrisporobacter.id.11348 |
| 2122 | rs149744580 | G | A | 0.169882696  | 0.031547837 | 7.01E-08 | 8459  | genus.Turicibacter.id.2162      |
| 2123 | rs4869133   | A | G | 0.131186095  | 0.027196968 | 2.55E-06 | 8256  | genus.Turicibacter.id.2162      |
| 2124 | rs12603364  | C | T | 0.110860918  | 0.022559841 | 8.67E-07 | 8923  | genus.Turicibacter.id.2162      |
| 2125 | rs11054680  | C | T | -0.104751216 | 0.02269975  | 2.31E-06 | 8928  | genus.Turicibacter.id.2162      |
| 2126 | rs55756211  | C | T | -0.115115214 | 0.024070764 | 2.81E-06 | 8941  | genus.Turicibacter.id.2162      |
| 2127 | rs61265175  | C | G | -0.085859068 | 0.018577761 | 4.14E-06 | 8941  | genus.Turicibacter.id.2162      |
| 2128 | rs7199484   | A | G | -0.07314282  | 0.016017166 | 5.77E-06 | 8948  | genus.Turicibacter.id.2162      |
| 2129 | rs11649454  | C | G | 0.095089088  | 0.020343331 | 3.27E-06 | 8943  | genus.Turicibacter.id.2162      |
| 2130 | rs2834977   | C | T | -0.095999549 | 0.020826107 | 3.96E-06 | 8946  | genus.Turicibacter.id.2162      |
| 2131 | rs2952020   | A | G | -0.075901896 | 0.016576375 | 5.63E-06 | 8949  | genus.Turicibacter.id.2162      |
| 2132 | rs11666533  | T | C | -0.111689111 | 0.024843618 | 7.37E-06 | 8256  | genus.Turicibacter.id.2162      |
| 2133 | rs4247078   | G | C | 0.071037672  | 0.015522123 | 5.46E-06 | 8948  | genus.Turicibacter.id.2162      |
| 2134 | rs2221441   | C | G | 0.071036413  | 0.015343033 | 3.46E-06 | 8720  | genus.Turicibacter.id.2162      |
| 2135 | rs3734633   | A | G | -0.120956846 | 0.026830036 | 5.32E-06 | 8626  | genus.Turicibacter.id.2162      |
| 2136 | rs67476743  | G | T | 0.132163631  | 0.02220797  | 3.74E-09 | 4948  | genus.Tyzzereella3.id.11335     |
| 2137 | rs17706273  | C | T | -0.140368365 | 0.027470793 | 5.88E-07 | 5395  | genus.Tyzzereella3.id.11335     |
| 2138 | rs7561370   | C | T | 0.131341092  | 0.028629245 | 1.52E-06 | 5396  | genus.Tyzzereella3.id.11335     |
| 2139 | rs55799124  | G | A | -0.114350138 | 0.023860417 | 1.34E-06 | 5362  | genus.Tyzzereella3.id.11335     |
| 2140 | rs7019909   | C | T | 0.144155503  | 0.030162645 | 1.76E-06 | 5396  | genus.Tyzzereella3.id.11335     |
| 2141 | rs75091807  | T | G | -0.184966239 | 0.038302914 | 1.71E-06 | 4621  | genus.Tyzzereella3.id.11335     |
| 2142 | rs4904512   | C | T | -0.117150935 | 0.025030561 | 3.09E-06 | 5396  | genus.Tyzzereella3.id.11335     |

|      | A           | B | C | D            | E           | F        | G     | H                            |
|------|-------------|---|---|--------------|-------------|----------|-------|------------------------------|
| 2143 | rs7333521   | C | T | -0.20719145  | 0.045312058 | 4.88E-06 | 4335  | genus.Tyzzarella3.id.11335   |
| 2144 | rs112102233 | G | A | -0.216348445 | 0.04775752  | 6.18E-06 | 3857  | genus.Tyzzarella3.id.11335   |
| 2145 | rs1232220   | T | G | -0.143869315 | 0.031828041 | 7.91E-06 | 5000  | genus.Tyzzarella3.id.11335   |
| 2146 | rs191093    | A | G | 0.15900811   | 0.035330566 | 6.76E-06 | 4621  | genus.Tyzzarella3.id.11335   |
| 2147 | rs10898797  | T | C | 0.122380253  | 0.027468252 | 8.85E-06 | 5387  | genus.Tyzzarella3.id.11335   |
| 2148 | rs6920448   | T | C | -0.141080632 | 0.030544578 | 4.15E-06 | 5010  | genus.Tyzzarella3.id.11335   |
| 2149 | rs2013594   | C | T | -0.072069819 | 0.01551532  | 3.42E-06 | 9283  | genus.Veillonella.id.2198    |
| 2150 | rs12679709  | G | C | -0.079349857 | 0.016481776 | 1.78E-06 | 9290  | genus.Veillonella.id.2198    |
| 2151 | rs742016    | G | A | -0.068857084 | 0.01497691  | 4.66E-06 | 9279  | genus.Veillonella.id.2198    |
| 2152 | rs1882878   | G | A | -0.07689658  | 0.016390829 | 2.98E-06 | 9282  | genus.Veillonella.id.2198    |
| 2153 | rs7645873   | T | A | 0.076138533  | 0.016422757 | 3.12E-06 | 9286  | genus.Veillonella.id.2198    |
| 2154 | rs55807413  | G | A | 0.107329355  | 0.023763343 | 5.51E-06 | 8610  | genus.Veillonella.id.2198    |
| 2155 | rs62376424  | T | C | -0.076221631 | 0.016349923 | 3.65E-06 | 8999  | genus.Veillonella.id.2198    |
| 2156 | rs7359080   | A | C | -0.135390734 | 0.030351973 | 7.40E-06 | 6189  | genus.Veillonella.id.2198    |
| 2157 | rs11141494  | A | G | -0.078342138 | 0.017439254 | 9.75E-06 | 9291  | genus.Veillonella.id.2198    |
| 2158 | rs6656807   | G | A | 0.070306243  | 0.015395397 | 5.50E-06 | 8999  | genus.Veillonella.id.2198    |
| 2159 | rs11614532  | C | G | 0.074453782  | 0.016521422 | 7.13E-06 | 8411  | genus.Veillonella.id.2198    |
| 2160 | rs56349194  | G | A | -0.158501176 | 0.031523075 | 6.26E-07 | 3266  | genus.Victivallis.id.2256    |
| 2161 | rs592514    | A | T | -0.181448867 | 0.039167751 | 2.60E-06 | 3241  | genus.Victivallis.id.2256    |
| 2162 | rs911666    | C | T | -0.118575703 | 0.026314576 | 7.65E-06 | 3267  | genus.Victivallis.id.2256    |
| 2163 | rs4764863   | A | G | 0.121560633  | 0.024605824 | 8.22E-07 | 3266  | genus.Victivallis.id.2256    |
| 2164 | rs12512543  | C | A | -0.1780361   | 0.037434441 | 2.54E-06 | 3239  | genus.Victivallis.id.2256    |
| 2165 | rs342302    | G | A | -0.152754045 | 0.035157217 | 8.16E-06 | 3265  | genus.Victivallis.id.2256    |
| 2166 | rs4895919   | C | T | -0.116917513 | 0.024751549 | 2.75E-06 | 3254  | genus.Victivallis.id.2256    |
| 2167 | rs11899949  | A | G | 0.130567821  | 0.027623889 | 2.77E-06 | 3258  | genus.Victivallis.id.2256    |
| 2168 | rs173120    | C | T | 0.133809734  | 0.029012714 | 7.65E-06 | 3263  | genus.Victivallis.id.2256    |
| 2169 | rs2546432   | C | T | -0.110803155 | 0.024965483 | 9.93E-06 | 3266  | genus.Victivallis.id.2256    |
| 2170 | rs1882775   | G | A | -0.138270295 | 0.031272974 | 8.73E-06 | 3258  | genus.Victivallis.id.2256    |
| 2171 | rs35011108  | G | A | 0.24154595   | 0.050380314 | 1.88E-06 | 3630  | order.Actinomycetales.id.420 |
| 2172 | rs2889192   | T | G | 0.088405157  | 0.019499679 | 3.97E-06 | 7711  | order.Actinomycetales.id.420 |
| 2173 | rs34583783  | T | G | 0.123687922  | 0.026425408 | 5.54E-06 | 7711  | order.Actinomycetales.id.420 |
| 2174 | rs4073240   | A | G | 0.074972982  | 0.016467174 | 5.68E-06 | 7711  | order.Actinomycetales.id.420 |
| 2175 | rs58484246  | C | T | 0.075828017  | 0.016899684 | 6.67E-06 | 7711  | order.Actinomycetales.id.420 |
| 2176 | rs74887130  | G | C | -0.192165775 | 0.035881712 | 1.16E-07 | 3218  | order.Bacillales.id.1674     |
| 2177 | rs4617108   | G | A | 0.248860918  | 0.052592896 | 1.98E-06 | 3018  | order.Bacillales.id.1674     |
| 2178 | rs62640857  | G | A | 0.148237754  | 0.032645545 | 4.49E-06 | 3235  | order.Bacillales.id.1674     |
| 2179 | rs1287018   | A | G | 0.141125041  | 0.031930898 | 9.87E-06 | 3207  | order.Bacillales.id.1674     |
| 2180 | rs10410917  | C | T | 0.114710488  | 0.02500254  | 5.57E-06 | 3239  | order.Bacillales.id.1674     |
| 2181 | rs74420793  | G | A | -0.164413018 | 0.035376325 | 3.07E-06 | 3077  | order.Bacillales.id.1674     |
| 2182 | rs11034576  | G | A | 0.205764503  | 0.045331088 | 8.86E-06 | 3076  | order.Bacillales.id.1674     |
| 2183 | rs11207728  | A | G | -0.144550179 | 0.031691157 | 5.73E-06 | 3239  | order.Bacillales.id.1674     |
| 2184 | rs11844714  | G | A | -0.143245189 | 0.032027153 | 5.06E-06 | 3239  | order.Bacillales.id.1674     |
| 2185 | rs12522021  | A | T | 0.174338861  | 0.040051506 | 7.60E-06 | 3235  | order.Bacillales.id.1674     |
| 2186 | rs55773148  | A | G | -0.121513597 | 0.023675903 | 3.90E-07 | 11349 | order.Bacteroidales.id.913   |
| 2187 | rs7631304   | A | G | -0.064577053 | 0.013295739 | 8.37E-07 | 18334 | order.Bacteroidales.id.913   |
| 2188 | rs73975615  | A | G | -0.207017892 | 0.044263343 | 1.22E-06 | 3350  | order.Bacteroidales.id.913   |
| 2189 | rs111845179 | C | T | 0.102647804  | 0.021384281 | 9.24E-07 | 16393 | order.Bacteroidales.id.913   |
| 2190 | rs2032750   | C | T | -0.050839276 | 0.010680731 | 1.92E-06 | 17853 | order.Bacteroidales.id.913   |
| 2191 | rs929878    | T | C | -0.054853206 | 0.012152954 | 4.73E-06 | 18334 | order.Bacteroidales.id.913   |
| 2192 | rs13291169  | G | C | 0.068967579  | 0.014876501 | 3.75E-06 | 17513 | order.Bacteroidales.id.913   |
| 2193 | rs17343978  | C | A | -0.055205684 | 0.012027767 | 8.36E-06 | 18334 | order.Bacteroidales.id.913   |

|      | A           | B | C | D            | E           | F        | G     | H                              |
|------|-------------|---|---|--------------|-------------|----------|-------|--------------------------------|
| 2194 | rs72706335  | C | T | -0.222409754 | 0.049345816 | 7.66E-06 | 3819  | order.Bacteroidales.id.913     |
| 2195 | rs11146701  | G | A | 0.047359582  | 0.010540996 | 7.08E-06 | 18220 | order.Bacteroidales.id.913     |
| 2196 | rs62531359  | G | T | 0.065572807  | 0.014989058 | 9.09E-06 | 18320 | order.Bacteroidales.id.913     |
| 2197 | rs4146051   | G | A | -0.107377003 | 0.024566124 | 8.76E-06 | 11372 | order.Bacteroidales.id.913     |
| 2198 | rs79585701  | C | A | 0.064682288  | 0.01496282  | 9.99E-06 | 18334 | order.Bacteroidales.id.913     |
| 2199 | rs4916508   | A | G | -0.046672941 | 0.010531247 | 8.47E-06 | 18324 | order.Bacteroidales.id.913     |
| 2200 | rs62575403  | T | C | 0.140054866  | 0.031112824 | 7.06E-06 | 9668  | order.Bacteroidales.id.913     |
| 2201 | rs7322849   | C | T | 0.110675689  | 0.020099551 | 1.74E-08 | 14915 | order.Bifidobacteriales.id.432 |
| 2202 | rs76671854  | G | C | -0.089298109 | 0.018317684 | 1.04E-06 | 13923 | order.Bifidobacteriales.id.432 |
| 2203 | rs4957061   | C | T | 0.056987252  | 0.011690731 | 1.15E-06 | 14795 | order.Bifidobacteriales.id.432 |
| 2204 | rs10841473  | C | G | -0.061303123 | 0.012884445 | 2.28E-06 | 14914 | order.Bifidobacteriales.id.432 |
| 2205 | rs4567981   | A | T | 0.057776313  | 0.011738841 | 8.88E-07 | 14795 | order.Bifidobacteriales.id.432 |
| 2206 | rs13020688  | A | G | 0.058404469  | 0.012208136 | 1.57E-06 | 14795 | order.Bifidobacteriales.id.432 |
| 2207 | rs677208    | C | G | 0.072858928  | 0.016482072 | 6.00E-06 | 14915 | order.Bifidobacteriales.id.432 |
| 2208 | rs12446429  | C | T | 0.081009916  | 0.019073029 | 8.53E-06 | 14008 | order.Bifidobacteriales.id.432 |
| 2209 | rs540489    | G | T | -0.06325184  | 0.013816951 | 5.37E-06 | 14688 | order.Bifidobacteriales.id.432 |
| 2210 | rs857444    | T | C | 0.05539651   | 0.012066937 | 3.82E-06 | 14914 | order.Bifidobacteriales.id.432 |
| 2211 | rs10857328  | A | T | 0.056200033  | 0.012639517 | 7.24E-06 | 14915 | order.Bifidobacteriales.id.432 |
| 2212 | rs10831953  | A | G | 0.053753749  | 0.012374596 | 9.95E-06 | 14915 | order.Bifidobacteriales.id.432 |
| 2213 | rs7174549   | T | C | 0.055172631  | 0.01246547  | 6.87E-06 | 14915 | order.Bifidobacteriales.id.432 |
| 2214 | rs73797465  | G | T | -0.094261173 | 0.020842122 | 4.85E-06 | 14795 | order.Bifidobacteriales.id.432 |
| 2215 | rs10496759  | C | G | 0.063713288  | 0.014430511 | 8.80E-06 | 14914 | order.Bifidobacteriales.id.432 |
| 2216 | rs55888705  | G | A | 0.053672952  | 0.012058615 | 8.66E-06 | 14914 | order.Bifidobacteriales.id.432 |
| 2217 | rs6899771   | G | A | -0.09143118  | 0.020260353 | 7.28E-06 | 14150 | order.Bifidobacteriales.id.432 |
| 2218 | rs6087811   | G | T | -0.101586745 | 0.019881673 | 2.88E-07 | 16135 | order.Burkholderiales.id.2874  |
| 2219 | rs4033856   | T | C | 0.083344552  | 0.016748909 | 5.67E-07 | 15897 | order.Burkholderiales.id.2874  |
| 2220 | rs2367850   | C | G | 0.063330043  | 0.013059522 | 1.24E-06 | 16664 | order.Burkholderiales.id.2874  |
| 2221 | rs62395635  | C | T | 0.109911047  | 0.023637504 | 2.90E-06 | 15062 | order.Burkholderiales.id.2874  |
| 2222 | rs2321387   | A | G | -0.050851372 | 0.010958763 | 3.26E-06 | 17095 | order.Burkholderiales.id.2874  |
| 2223 | rs7638039   | C | T | 0.058098748  | 0.012673046 | 4.84E-06 | 17078 | order.Burkholderiales.id.2874  |
| 2224 | rs2613606   | T | C | -0.049956147 | 0.010926388 | 4.13E-06 | 17092 | order.Burkholderiales.id.2874  |
| 2225 | rs72747231  | G | C | -0.133728739 | 0.029073834 | 3.76E-06 | 11315 | order.Burkholderiales.id.2874  |
| 2226 | rs1928341   | G | A | 0.050778221  | 0.011058697 | 4.52E-06 | 17096 | order.Burkholderiales.id.2874  |
| 2227 | rs9964679   | G | A | 0.052509048  | 0.011503961 | 6.06E-06 | 17097 | order.Burkholderiales.id.2874  |
| 2228 | rs1511453   | G | A | 0.09109992   | 0.01994793  | 8.00E-06 | 17032 | order.Burkholderiales.id.2874  |
| 2229 | rs75242906  | T | C | -0.120974344 | 0.028127277 | 9.75E-06 | 10766 | order.Burkholderiales.id.2874  |
| 2230 | rs6815608   | C | T | 0.104089026  | 0.021088307 | 3.72E-07 | 16731 | order.Clostridiales.id.1863    |
| 2231 | rs112334273 | A | G | 0.063938344  | 0.012740449 | 4.07E-07 | 18217 | order.Clostridiales.id.1863    |
| 2232 | rs6814436   | C | T | 0.074185762  | 0.015081384 | 9.06E-07 | 18336 | order.Clostridiales.id.1863    |
| 2233 | rs72915163  | C | T | -0.058024623 | 0.012055772 | 1.39E-06 | 18317 | order.Clostridiales.id.1863    |
| 2234 | rs2273429   | G | A | -0.072619093 | 0.015310519 | 4.17E-06 | 18337 | order.Clostridiales.id.1863    |
| 2235 | rs10774377  | G | A | 0.052300318  | 0.011385929 | 3.81E-06 | 18330 | order.Clostridiales.id.1863    |
| 2236 | rs13179700  | C | T | 0.051095292  | 0.010956887 | 3.52E-06 | 18338 | order.Clostridiales.id.1863    |
| 2237 | rs6934062   | C | G | 0.05223974   | 0.011611578 | 7.09E-06 | 17859 | order.Clostridiales.id.1863    |
| 2238 | rs10209007  | C | G | 0.079542419  | 0.018242704 | 9.60E-06 | 17812 | order.Clostridiales.id.1863    |
| 2239 | rs1842454   | A | G | -0.054367588 | 0.012734002 | 9.92E-06 | 18340 | order.Clostridiales.id.1863    |
| 2240 | rs76767978  | A | G | 0.069980605  | 0.015631841 | 8.18E-06 | 18329 | order.Clostridiales.id.1863    |
| 2241 | rs13105690  | C | T | -0.052744064 | 0.011818018 | 9.37E-06 | 18340 | order.Clostridiales.id.1863    |
| 2242 | rs7269302   | T | A | -0.096534637 | 0.02120063  | 8.84E-06 | 17405 | order.Clostridiales.id.1863    |
| 2243 | rs72738886  | C | T | 0.086533337  | 0.019039215 | 8.42E-06 | 16934 | order.Clostridiales.id.1863    |
| 2244 | rs76860606  | G | C | 0.094122019  | 0.022511723 | 8.58E-06 | 17579 | order.Clostridiales.id.1863    |

|      | A           | B | C | D            | E           | F        | G     | H                                |
|------|-------------|---|---|--------------|-------------|----------|-------|----------------------------------|
| 2245 | rs290772    | A | G | 0.084254009  | 0.01962973  | 1.00E-05 | 17129 | order.Clostridiales.id.1863      |
| 2246 | rs6442336   | T | C | -0.054772905 | 0.012416948 | 9.63E-06 | 18333 | order.Clostridiales.id.1863      |
| 2247 | rs719099    | G | A | 0.077840173  | 0.01558151  | 5.43E-07 | 17687 | order.Coriobacteriales.id.810    |
| 2248 | rs240104    | C | T | -0.060342897 | 0.012684911 | 1.52E-06 | 17577 | order.Coriobacteriales.id.810    |
| 2249 | rs11250875  | C | T | 0.060749978  | 0.013093887 | 4.83E-06 | 17690 | order.Coriobacteriales.id.810    |
| 2250 | rs34739816  | T | G | 0.096501674  | 0.020766582 | 3.88E-06 | 16593 | order.Coriobacteriales.id.810    |
| 2251 | rs76779974  | G | C | 0.0774888    | 0.017187698 | 5.63E-06 | 16419 | order.Coriobacteriales.id.810    |
| 2252 | rs80046645  | G | C | 0.255839805  | 0.056199532 | 4.66E-06 | 3204  | order.Coriobacteriales.id.810    |
| 2253 | rs1816223   | G | A | -0.058626474 | 0.012900576 | 4.84E-06 | 17688 | order.Coriobacteriales.id.810    |
| 2254 | rs67561917  | G | A | -0.071436723 | 0.015411343 | 5.39E-06 | 17333 | order.Coriobacteriales.id.810    |
| 2255 | rs3025411   | G | A | 0.092654285  | 0.020946781 | 8.27E-06 | 15671 | order.Coriobacteriales.id.810    |
| 2256 | rs11656361  | C | A | 0.077300587  | 0.01755297  | 8.02E-06 | 16665 | order.Coriobacteriales.id.810    |
| 2257 | rs1397793   | A | G | -0.049885455 | 0.011244635 | 9.77E-06 | 17527 | order.Coriobacteriales.id.810    |
| 2258 | rs11073596  | G | T | 0.051021228  | 0.011433922 | 8.14E-06 | 17527 | order.Coriobacteriales.id.810    |
| 2259 | rs2442778   | A | G | -0.116408329 | 0.025854513 | 9.03E-06 | 13472 | order.Coriobacteriales.id.810    |
| 2260 | rs62448869  | A | T | -0.048605943 | 0.010898242 | 7.87E-06 | 17527 | order.Coriobacteriales.id.810    |
| 2261 | rs13307134  | T | C | 0.056568602  | 0.012626474 | 7.80E-06 | 17527 | order.Coriobacteriales.id.810    |
| 2262 | rs12974142  | A | G | 0.078979608  | 0.017720479 | 8.51E-06 | 17413 | order.Coriobacteriales.id.810    |
| 2263 | rs8010111   | A | G | -0.10337688  | 0.022928631 | 6.90E-06 | 15996 | order.Coriobacteriales.id.810    |
| 2264 | rs6058181   | T | C | 0.083676458  | 0.016609784 | 2.53E-07 | 15076 | order.Desulfovibrionales.id.3156 |
| 2265 | rs4506934   | T | C | -0.095338347 | 0.020136702 | 2.43E-06 | 15037 | order.Desulfovibrionales.id.3156 |
| 2266 | rs11599763  | C | T | -0.055486167 | 0.011748632 | 2.61E-06 | 15144 | order.Desulfovibrionales.id.3156 |
| 2267 | rs2838334   | A | G | 0.056902402  | 0.01242233  | 4.17E-06 | 15144 | order.Desulfovibrionales.id.3156 |
| 2268 | rs9928243   | A | C | -0.054471273 | 0.011781078 | 3.97E-06 | 15143 | order.Desulfovibrionales.id.3156 |
| 2269 | rs112381107 | T | C | 0.210090212  | 0.045697378 | 3.22E-06 | 4455  | order.Desulfovibrionales.id.3156 |
| 2270 | rs16851319  | C | G | -0.072913728 | 0.015095443 | 2.70E-06 | 15130 | order.Desulfovibrionales.id.3156 |
| 2271 | rs17791387  | G | A | -0.072750113 | 0.015436947 | 2.25E-06 | 15047 | order.Desulfovibrionales.id.3156 |
| 2272 | rs186073    | C | T | 0.052921896  | 0.011854172 | 8.74E-06 | 14841 | order.Desulfovibrionales.id.3156 |
| 2273 | rs2692012   | G | A | 0.112244115  | 0.025355338 | 2.27E-06 | 13082 | order.Desulfovibrionales.id.3156 |
| 2274 | rs62020470  | G | A | -0.057363273 | 0.012946185 | 7.51E-06 | 15144 | order.Desulfovibrionales.id.3156 |
| 2275 | rs3935584   | T | C | -0.052446625 | 0.011574877 | 7.20E-06 | 15142 | order.Desulfovibrionales.id.3156 |
| 2276 | rs72647048  | C | T | -0.077245856 | 0.017087645 | 9.00E-06 | 15144 | order.Desulfovibrionales.id.3156 |
| 2277 | rs78143293  | G | A | -0.084852127 | 0.017041521 | 1.20E-06 | 13572 | order.Enterobacteriales.id.3468  |
| 2278 | rs111229068 | T | A | 0.110560883  | 0.024171888 | 3.65E-06 | 12350 | order.Enterobacteriales.id.3468  |
| 2279 | rs62210023  | G | A | 0.060675357  | 0.013012497 | 3.13E-06 | 13515 | order.Enterobacteriales.id.3468  |
| 2280 | rs504442    | G | T | 0.084159032  | 0.01894789  | 5.17E-06 | 13578 | order.Enterobacteriales.id.3468  |
| 2281 | rs80319214  | G | C | 0.099040406  | 0.021587746 | 6.95E-06 | 12641 | order.Enterobacteriales.id.3468  |
| 2282 | rs11026530  | C | T | 0.082240818  | 0.018637912 | 9.43E-06 | 13485 | order.Enterobacteriales.id.3468  |
| 2283 | rs2374342   | A | C | 0.058292653  | 0.01261946  | 4.52E-06 | 13577 | order.Enterobacteriales.id.3468  |
| 2284 | rs79757635  | A | C | 0.075859672  | 0.017128562 | 9.32E-06 | 13419 | order.Enterobacteriales.id.3468  |
| 2285 | rs35673018  | A | G | 0.08996415   | 0.020293422 | 7.63E-06 | 13326 | order.Enterobacteriales.id.3468  |
| 2286 | rs61973590  | G | C | -0.060539207 | 0.013369618 | 8.54E-06 | 13570 | order.Enterobacteriales.id.3468  |
| 2287 | rs4792380   | T | A | 0.115597849  | 0.025768301 | 9.49E-06 | 12763 | order.Enterobacteriales.id.3468  |
| 2288 | rs62504403  | T | C | 0.068115892  | 0.012788339 | 1.12E-07 | 16981 | order.Erysipelotrichales.id.2148 |
| 2289 | rs7234058   | C | T | -0.094575892 | 0.019409083 | 9.12E-07 | 16874 | order.Erysipelotrichales.id.2148 |
| 2290 | rs17530232  | G | A | 0.103049982  | 0.022464754 | 2.79E-06 | 16622 | order.Erysipelotrichales.id.2148 |
| 2291 | rs2300774   | A | G | 0.052415201  | 0.010678379 | 8.95E-07 | 18216 | order.Erysipelotrichales.id.2148 |
| 2292 | rs35161940  | C | T | -0.080604056 | 0.01676409  | 1.85E-06 | 18213 | order.Erysipelotrichales.id.2148 |
| 2293 | rs10781552  | T | C | -0.055221236 | 0.011607425 | 2.33E-06 | 17789 | order.Erysipelotrichales.id.2148 |
| 2294 | rs8003149   | T | C | 0.053879756  | 0.01168879  | 4.08E-06 | 18213 | order.Erysipelotrichales.id.2148 |
| 2295 | rs4078432   | T | C | -0.060892934 | 0.013376363 | 4.23E-06 | 17789 | order.Erysipelotrichales.id.2148 |

|      | A           | B | C | D            | E           | F        | G     | H                                 |
|------|-------------|---|---|--------------|-------------|----------|-------|-----------------------------------|
| 2296 | rs1074800   | G | A | 0.049243827  | 0.010887044 | 6.15E-06 | 17789 | order.Erysipelotrichales.id.2148  |
| 2297 | rs56970041  | G | T | 0.072414447  | 0.016447064 | 5.40E-06 | 18217 | order.Erysipelotrichales.id.2148  |
| 2298 | rs7826267   | G | T | -0.083907147 | 0.019913089 | 9.28E-06 | 17586 | order.Erysipelotrichales.id.2148  |
| 2299 | rs1884466   | T | C | -0.047536345 | 0.01069386  | 9.53E-06 | 18205 | order.Erysipelotrichales.id.2148  |
| 2300 | rs290833    | G | T | -0.049737371 | 0.011137647 | 8.03E-06 | 17789 | order.Erysipelotrichales.id.2148  |
| 2301 | rs9864379   | C | T | -0.160521381 | 0.029275217 | 4.66E-08 | 5768  | order.Gastranaerophilales.id.1591 |
| 2302 | rs11150282  | C | T | 0.098234998  | 0.019712655 | 7.36E-07 | 5864  | order.Gastranaerophilales.id.1591 |
| 2303 | rs16851659  | C | G | -0.089516816 | 0.01865552  | 1.27E-06 | 5875  | order.Gastranaerophilales.id.1591 |
| 2304 | rs4129395   | A | G | 0.090426365  | 0.01852532  | 1.22E-06 | 5878  | order.Gastranaerophilales.id.1591 |
| 2305 | rs1221147   | A | T | 0.126305018  | 0.027916132 | 4.86E-06 | 5759  | order.Gastranaerophilales.id.1591 |
| 2306 | rs79790072  | C | T | 0.226102517  | 0.048801659 | 3.54E-06 | 4104  | order.Gastranaerophilales.id.1591 |
| 2307 | rs73074665  | T | A | 0.164631221  | 0.035603665 | 3.62E-06 | 5749  | order.Gastranaerophilales.id.1591 |
| 2308 | rs113884518 | C | T | -0.205909694 | 0.045537561 | 7.74E-06 | 4434  | order.Gastranaerophilales.id.1591 |
| 2309 | rs789069    | C | A | -0.104129854 | 0.023445913 | 6.50E-06 | 5870  | order.Gastranaerophilales.id.1591 |
| 2310 | rs367480    | A | G | -0.084164921 | 0.018594792 | 7.52E-06 | 5878  | order.Gastranaerophilales.id.1591 |
| 2311 | rs8028558   | G | A | 0.083459982  | 0.018850404 | 9.78E-06 | 5875  | order.Gastranaerophilales.id.1591 |
| 2312 | rs28678345  | C | T | 0.213082993  | 0.047137686 | 8.06E-06 | 4315  | order.Gastranaerophilales.id.1591 |
| 2313 | rs35344081  | A | G | 0.064244209  | 0.012735835 | 4.16E-07 | 17292 | order.Lactobacillales.id.1800     |
| 2314 | rs76717940  | A | T | 0.160942577  | 0.032699971 | 6.55E-07 | 7976  | order.Lactobacillales.id.1800     |
| 2315 | rs77558518  | G | A | -0.106465937 | 0.022348355 | 1.67E-06 | 15758 | order.Lactobacillales.id.1800     |
| 2316 | rs11110282  | G | A | -0.102389846 | 0.021784941 | 3.96E-06 | 15956 | order.Lactobacillales.id.1800     |
| 2317 | rs9581006   | T | C | 0.225829511  | 0.046922805 | 1.77E-06 | 4224  | order.Lactobacillales.id.1800     |
| 2318 | rs4028634   | C | T | 0.053291462  | 0.011009978 | 1.35E-06 | 17295 | order.Lactobacillales.id.1800     |
| 2319 | rs74352383  | A | T | -0.103396459 | 0.021757973 | 1.88E-06 | 16442 | order.Lactobacillales.id.1800     |
| 2320 | rs78938557  | C | T | 0.105530209  | 0.023358105 | 2.31E-06 | 15152 | order.Lactobacillales.id.1800     |
| 2321 | rs57872228  | T | C | -0.068841481 | 0.014699394 | 2.58E-06 | 17293 | order.Lactobacillales.id.1800     |
| 2322 | rs1962325   | G | C | 0.054687802  | 0.01150694  | 1.96E-06 | 17274 | order.Lactobacillales.id.1800     |
| 2323 | rs11730038  | A | G | -0.060538395 | 0.01290523  | 5.10E-06 | 17295 | order.Lactobacillales.id.1800     |
| 2324 | rs2370083   | T | G | -0.080539958 | 0.018099185 | 8.33E-06 | 17183 | order.Lactobacillales.id.1800     |
| 2325 | rs12797734  | C | T | 0.057127947  | 0.012711299 | 7.77E-06 | 16820 | order.Lactobacillales.id.1800     |
| 2326 | rs34989881  | G | A | 0.113478844  | 0.024645168 | 4.09E-06 | 12921 | order.Lactobacillales.id.1800     |
| 2327 | rs11627423  | A | C | 0.049926314  | 0.010974412 | 5.09E-06 | 17275 | order.Lactobacillales.id.1800     |
| 2328 | rs111552159 | G | C | 0.128854393  | 0.028739711 | 8.31E-06 | 11312 | order.Lactobacillales.id.1800     |
| 2329 | rs1595463   | A | C | 0.047974934  | 0.010880146 | 7.44E-06 | 17276 | order.Lactobacillales.id.1800     |
| 2330 | rs74663707  | T | C | 0.09825937   | 0.022461255 | 8.40E-06 | 15695 | order.Lactobacillales.id.1800     |
| 2331 | rs73457410  | G | A | 0.215339755  | 0.04366952  | 1.41E-06 | 3498  | order.Methanobacteriales.id.120   |
| 2332 | rs6776814   | C | T | -0.199565931 | 0.04118249  | 1.63E-06 | 3385  | order.Methanobacteriales.id.120   |
| 2333 | rs894996    | A | C | 0.216999069  | 0.044907554 | 1.88E-06 | 3582  | order.Methanobacteriales.id.120   |
| 2334 | rs75208022  | T | C | -0.227244713 | 0.048763001 | 5.92E-06 | 3203  | order.Methanobacteriales.id.120   |
| 2335 | rs12825290  | G | C | -0.216781075 | 0.049349641 | 6.08E-06 | 3144  | order.Methanobacteriales.id.120   |
| 2336 | rs56131665  | A | G | 0.178661188  | 0.039297982 | 6.18E-06 | 3572  | order.Methanobacteriales.id.120   |
| 2337 | rs4257531   | A | G | 0.164498365  | 0.03649593  | 7.44E-06 | 3162  | order.Methanobacteriales.id.120   |
| 2338 | rs6508769   | C | T | 0.15351913   | 0.034451866 | 8.23E-06 | 3319  | order.Methanobacteriales.id.120   |
| 2339 | rs73068003  | T | G | -0.158140381 | 0.035180317 | 8.45E-06 | 3692  | order.Methanobacteriales.id.120   |
| 2340 | rs10424197  | A | G | -0.111274175 | 0.024751678 | 9.28E-06 | 3698  | order.Methanobacteriales.id.120   |
| 2341 | rs74603314  | C | T | 0.230767094  | 0.048970099 | 2.28E-06 | 4033  | order.MollicutesRF9.id.11579      |
| 2342 | rs76373661  | A | G | 0.090821805  | 0.020298596 | 5.16E-06 | 10359 | order.MollicutesRF9.id.11579      |
| 2343 | rs17235252  | C | T | -0.12200211  | 0.02554629  | 2.16E-06 | 9531  | order.MollicutesRF9.id.11579      |
| 2344 | rs638542    | A | G | -0.070591966 | 0.015704899 | 5.17E-06 | 9970  | order.MollicutesRF9.id.11579      |
| 2345 | rs62188991  | C | G | -0.110864082 | 0.02413552  | 5.27E-06 | 9531  | order.MollicutesRF9.id.11579      |
| 2346 | rs949341    | A | G | 0.065660222  | 0.014721644 | 7.73E-06 | 10355 | order.MollicutesRF9.id.11579      |

|      | A           | B | C | D            | E           | F        | G     | H                              |
|------|-------------|---|---|--------------|-------------|----------|-------|--------------------------------|
| 2347 | rs13100746  | T | C | 0.063897883  | 0.014268538 | 7.29E-06 | 10359 | order.MollicutesRF9.id.11579   |
| 2348 | rs515984    | C | T | -0.087545066 | 0.019068514 | 6.61E-06 | 10359 | order.MollicutesRF9.id.11579   |
| 2349 | rs7706512   | A | G | 0.065735114  | 0.013897929 | 2.27E-06 | 10359 | order.MollicutesRF9.id.11579   |
| 2350 | rs11779863  | A | G | -0.077276806 | 0.017217056 | 6.69E-06 | 10353 | order.MollicutesRF9.id.11579   |
| 2351 | rs7801843   | G | A | -0.086949468 | 0.01945094  | 9.47E-06 | 10359 | order.MollicutesRF9.id.11579   |
| 2352 | rs10071529  | C | G | 0.125104505  | 0.027867407 | 8.64E-06 | 10147 | order.MollicutesRF9.id.11579   |
| 2353 | rs739151    | G | C | 0.065265852  | 0.013977274 | 3.09E-06 | 10337 | order.MollicutesRF9.id.11579   |
| 2354 | rs12566890  | G | T | -0.10313363  | 0.024177477 | 8.11E-06 | 10339 | order.MollicutesRF9.id.11579   |
| 2355 | rs3932485   | T | C | 0.062620895  | 0.014162324 | 9.93E-06 | 10359 | order.MollicutesRF9.id.11579   |
| 2356 | rs7853673   | A | G | -0.062438944 | 0.013983251 | 6.73E-06 | 10359 | order.MollicutesRF9.id.11579   |
| 2357 | rs60583455  | C | T | 0.108933641  | 0.021176966 | 2.60E-07 | 4773  | order.NB1n.id.3953             |
| 2358 | rs2172426   | T | C | -0.102119829 | 0.019894658 | 3.17E-07 | 5099  | order.NB1n.id.3953             |
| 2359 | rs11251024  | A | G | 0.104201088  | 0.020673705 | 6.63E-07 | 5107  | order.NB1n.id.3953             |
| 2360 | rs13219468  | C | G | 0.115343714  | 0.023695802 | 1.41E-06 | 5104  | order.NB1n.id.3953             |
| 2361 | rs267959    | G | A | 0.098861186  | 0.020967556 | 2.62E-06 | 5107  | order.NB1n.id.3953             |
| 2362 | rs11606187  | G | A | -0.154539114 | 0.032628781 | 3.31E-06 | 5102  | order.NB1n.id.3953             |
| 2363 | rs7911787   | T | G | -0.223070508 | 0.047023233 | 3.39E-06 | 3879  | order.NB1n.id.3953             |
| 2364 | rs72671304  | C | T | 0.172321792  | 0.037002808 | 3.80E-06 | 4887  | order.NB1n.id.3953             |
| 2365 | rs13385922  | C | T | 0.092949422  | 0.020134823 | 3.97E-06 | 5106  | order.NB1n.id.3953             |
| 2366 | rs4383094   | C | T | 0.149188097  | 0.032066228 | 4.28E-06 | 5091  | order.NB1n.id.3953             |
| 2367 | rs55921101  | T | A | -0.109245446 | 0.023620072 | 4.32E-06 | 5105  | order.NB1n.id.3953             |
| 2368 | rs9542068   | C | T | 0.099070907  | 0.021814934 | 6.52E-06 | 5107  | order.NB1n.id.3953             |
| 2369 | rs2930903   | G | C | 0.090833483  | 0.020943373 | 6.84E-06 | 4789  | order.NB1n.id.3953             |
| 2370 | rs60775321  | C | T | -0.096242537 | 0.021384172 | 7.10E-06 | 5101  | order.NB1n.id.3953             |
| 2371 | rs8126061   | C | T | -0.159135032 | 0.035190375 | 7.36E-06 | 5089  | order.NB1n.id.3953             |
| 2372 | rs166849    | A | G | 0.09110531   | 0.020223942 | 7.74E-06 | 5107  | order.NB1n.id.3953             |
| 2373 | rs80270230  | C | G | 0.176113096  | 0.039321411 | 8.41E-06 | 4261  | order.NB1n.id.3953             |
| 2374 | rs12191680  | G | C | 0.102213615  | 0.019718945 | 3.05E-07 | 9408  | order.Pasteurellales.id.3688   |
| 2375 | rs9382510   | T | C | -0.088186524 | 0.016996482 | 2.48E-07 | 9410  | order.Pasteurellales.id.3688   |
| 2376 | rs10840326  | G | C | -0.0717634   | 0.01492293  | 1.44E-06 | 9154  | order.Pasteurellales.id.3688   |
| 2377 | rs76022354  | T | C | 0.242889667  | 0.050040603 | 1.83E-06 | 3692  | order.Pasteurellales.id.3688   |
| 2378 | rs72756943  | A | G | 0.139879974  | 0.030302876 | 3.35E-06 | 8020  | order.Pasteurellales.id.3688   |
| 2379 | rs78909003  | C | T | -0.241159469 | 0.049837229 | 2.05E-06 | 3638  | order.Pasteurellales.id.3688   |
| 2380 | rs6092684   | T | A | 0.068464719  | 0.014673987 | 3.44E-06 | 9366  | order.Pasteurellales.id.3688   |
| 2381 | rs4822728   | C | T | 0.068547871  | 0.014903232 | 4.72E-06 | 9412  | order.Pasteurellales.id.3688   |
| 2382 | rs35510     | G | A | 0.122729003  | 0.026495751 | 4.02E-06 | 8671  | order.Pasteurellales.id.3688   |
| 2383 | rs10965428  | A | C | -0.119902083 | 0.025821904 | 4.29E-06 | 8873  | order.Pasteurellales.id.3688   |
| 2384 | rs16970009  | G | A | 0.187381473  | 0.042957182 | 7.32E-06 | 4703  | order.Pasteurellales.id.3688   |
| 2385 | rs12050685  | G | A | -0.067094787 | 0.015238983 | 9.19E-06 | 9411  | order.Pasteurellales.id.3688   |
| 2386 | rs73139353  | C | A | -0.222572658 | 0.048463428 | 8.71E-06 | 4047  | order.Pasteurellales.id.3688   |
| 2387 | rs6972479   | G | A | -0.078186189 | 0.01753656  | 7.75E-06 | 8616  | order.Pasteurellales.id.3688   |
| 2388 | rs9895850   | C | T | -0.176406461 | 0.041016971 | 9.08E-06 | 4737  | order.Pasteurellales.id.3688   |
| 2389 | rs111582866 | A | G | -0.113957275 | 0.025640298 | 7.07E-06 | 8616  | order.Pasteurellales.id.3688   |
| 2390 | rs62568866  | A | T | -0.118018253 | 0.025920615 | 7.23E-06 | 8020  | order.Pasteurellales.id.3688   |
| 2391 | rs731534    | G | C | -0.098650225 | 0.021631635 | 9.46E-06 | 9115  | order.Pasteurellales.id.3688   |
| 2392 | rs9938097   | C | T | -0.071038642 | 0.015802434 | 8.23E-06 | 9402  | order.Pasteurellales.id.3688   |
| 2393 | rs9813022   | G | A | -0.083079452 | 0.016264151 | 3.07E-07 | 8600  | order.Rhodospirillales.id.2667 |
| 2394 | rs11630875  | C | T | 0.094519847  | 0.02021388  | 3.70E-06 | 8595  | order.Rhodospirillales.id.2667 |
| 2395 | rs76784716  | G | A | 0.136039348  | 0.02843993  | 1.31E-06 | 8600  | order.Rhodospirillales.id.2667 |
| 2396 | rs3754624   | T | C | 0.094128044  | 0.01983893  | 2.68E-06 | 8598  | order.Rhodospirillales.id.2667 |
| 2397 | rs1549633   | C | A | 0.099673509  | 0.02166668  | 3.88E-06 | 8112  | order.Rhodospirillales.id.2667 |

|      | A           | B | C | D            | E           | F        | G     | H                                |
|------|-------------|---|---|--------------|-------------|----------|-------|----------------------------------|
| 2398 | rs7001029   | T | C | 0.120725521  | 0.026098899 | 2.83E-06 | 8063  | order.Rhodospirillales.id.2667   |
| 2399 | rs1035406   | A | G | -0.114724899 | 0.024799361 | 4.07E-06 | 8585  | order.Rhodospirillales.id.2667   |
| 2400 | rs4278423   | C | T | 0.105215078  | 0.023377775 | 3.98E-06 | 8603  | order.Rhodospirillales.id.2667   |
| 2401 | rs61933850  | A | G | 0.164662572  | 0.036028532 | 7.00E-06 | 6846  | order.Rhodospirillales.id.2667   |
| 2402 | rs77304857  | A | C | -0.099743255 | 0.02221655  | 6.02E-06 | 8602  | order.Rhodospirillales.id.2667   |
| 2403 | rs55876211  | T | C | -0.086500238 | 0.019519668 | 7.87E-06 | 8596  | order.Rhodospirillales.id.2667   |
| 2404 | rs11591293  | T | G | 0.072275477  | 0.01581858  | 4.69E-06 | 8602  | order.Rhodospirillales.id.2667   |
| 2405 | rs4822789   | C | G | 0.072775517  | 0.01595216  | 7.33E-06 | 8594  | order.Rhodospirillales.id.2667   |
| 2406 | rs13336560  | T | C | -0.069531323 | 0.0157065   | 9.75E-06 | 8112  | order.Rhodospirillales.id.2667   |
| 2407 | rs3730086   | G | A | 0.08003537   | 0.017873721 | 7.98E-06 | 8602  | order.Rhodospirillales.id.2667   |
| 2408 | rs1643968   | C | T | -0.056528439 | 0.011229806 | 4.15E-07 | 18170 | order.Selenomonadales.id.2165    |
| 2409 | rs60274479  | C | T | -0.065962286 | 0.013413689 | 1.16E-06 | 17610 | order.Selenomonadales.id.2165    |
| 2410 | rs13086907  | A | G | 0.062531199  | 0.013173503 | 1.95E-06 | 18163 | order.Selenomonadales.id.2165    |
| 2411 | rs73232831  | A | G | -0.151828859 | 0.03149318  | 1.87E-06 | 9382  | order.Selenomonadales.id.2165    |
| 2412 | rs71405394  | A | G | -0.114177822 | 0.02404996  | 2.17E-06 | 13861 | order.Selenomonadales.id.2165    |
| 2413 | rs61249479  | C | A | 0.077707533  | 0.01686282  | 2.95E-06 | 18165 | order.Selenomonadales.id.2165    |
| 2414 | rs1447205   | C | G | -0.050205329 | 0.010838203 | 2.93E-06 | 18165 | order.Selenomonadales.id.2165    |
| 2415 | rs4722181   | G | T | 0.050130576  | 0.010579796 | 2.00E-06 | 18163 | order.Selenomonadales.id.2165    |
| 2416 | rs4463806   | C | T | -0.05439664  | 0.012936525 | 7.81E-06 | 18160 | order.Selenomonadales.id.2165    |
| 2417 | rs9423647   | A | G | 0.047817029  | 0.010528201 | 6.06E-06 | 18164 | order.Selenomonadales.id.2165    |
| 2418 | rs2834062   | G | A | 0.0489057    | 0.010884164 | 8.44E-06 | 18171 | order.Selenomonadales.id.2165    |
| 2419 | rs1649999   | G | A | 0.074898861  | 0.01664577  | 7.58E-06 | 18036 | order.Selenomonadales.id.2165    |
| 2420 | rs1135612   | A | G | 0.052978507  | 0.01191767  | 9.26E-06 | 18164 | order.Selenomonadales.id.2165    |
| 2421 | rs11729256  | C | T | 0.074979802  | 0.015017677 | 6.73E-07 | 11861 | order.Verrucomicrobiales.id.4030 |
| 2422 | rs4936098   | G | A | 0.064884253  | 0.013592809 | 1.12E-06 | 11858 | order.Verrucomicrobiales.id.4030 |
| 2423 | rs9349825   | G | A | -0.070403566 | 0.014712789 | 2.54E-06 | 11858 | order.Verrucomicrobiales.id.4030 |
| 2424 | rs74542928  | C | T | 0.112163707  | 0.023642195 | 1.63E-06 | 11216 | order.Verrucomicrobiales.id.4030 |
| 2425 | rs2602429   | T | C | 0.074684437  | 0.015619438 | 2.58E-06 | 11690 | order.Verrucomicrobiales.id.4030 |
| 2426 | rs4242783   | A | G | 0.068929219  | 0.014769297 | 2.64E-06 | 11690 | order.Verrucomicrobiales.id.4030 |
| 2427 | rs11184341  | C | G | 0.065534193  | 0.014223078 | 4.13E-06 | 11864 | order.Verrucomicrobiales.id.4030 |
| 2428 | rs61779207  | A | G | -0.075830853 | 0.016776157 | 6.72E-06 | 11591 | order.Verrucomicrobiales.id.4030 |
| 2429 | rs117107102 | G | A | 0.20468288   | 0.043157251 | 2.92E-06 | 4975  | order.Verrucomicrobiales.id.4030 |
| 2430 | rs12908520  | A | G | 0.061892558  | 0.013094626 | 2.17E-06 | 11863 | order.Verrucomicrobiales.id.4030 |
| 2431 | rs111862613 | C | T | 0.090698957  | 0.019674596 | 3.74E-06 | 11621 | order.Verrucomicrobiales.id.4030 |
| 2432 | rs941682    | A | G | -0.063143598 | 0.014376741 | 9.61E-06 | 11809 | order.Verrucomicrobiales.id.4030 |
| 2433 | rs2825714   | G | A | -0.137410136 | 0.02892458  | 1.72E-06 | 4734  | order.Victivallales.id.2254      |
| 2434 | rs17114848  | A | G | 0.152376929  | 0.032433167 | 4.06E-06 | 4734  | order.Victivallales.id.2254      |
| 2435 | rs77599476  | G | A | 0.230291775  | 0.048016811 | 1.86E-06 | 3722  | order.Victivallales.id.2254      |
| 2436 | rs11770843  | T | C | 0.109430892  | 0.023487897 | 1.91E-06 | 4705  | order.Victivallales.id.2254      |
| 2437 | rs72640280  | G | A | 0.220206945  | 0.048619648 | 5.18E-06 | 3816  | order.Victivallales.id.2254      |
| 2438 | rs62570196  | T | C | -0.216350467 | 0.043986577 | 1.08E-06 | 3712  | order.Victivallales.id.2254      |
| 2439 | rs2731834   | G | C | 0.109437835  | 0.023692997 | 4.24E-06 | 4733  | order.Victivallales.id.2254      |
| 2440 | rs2031282   | G | A | 0.122368503  | 0.027032933 | 4.38E-06 | 4734  | order.Victivallales.id.2254      |
| 2441 | rs1002941   | A | G | 0.105025041  | 0.023348442 | 8.15E-06 | 4734  | order.Victivallales.id.2254      |
| 2442 | rs73113483  | A | T | -0.131216985 | 0.0288713   | 8.66E-06 | 4718  | order.Victivallales.id.2254      |
| 2443 | rs4429415   | T | C | 0.058190752  | 0.011134335 | 2.05E-07 | 17990 | phylum.Actinobacteria.id.400     |
| 2444 | rs10841473  | C | G | -0.059657241 | 0.011753696 | 4.47E-07 | 17987 | phylum.Actinobacteria.id.400     |
| 2445 | rs74037001  | A | G | -0.081939134 | 0.016533368 | 6.71E-07 | 17179 | phylum.Actinobacteria.id.400     |
| 2446 | rs55888705  | G | A | 0.053422107  | 0.010997529 | 1.31E-06 | 17988 | phylum.Actinobacteria.id.400     |
| 2447 | rs62448869  | A | T | -0.052453124 | 0.010822585 | 1.14E-06 | 17782 | phylum.Actinobacteria.id.400     |
| 2448 | rs8047955   | G | A | 0.052111493  | 0.011119219 | 2.66E-06 | 17980 | phylum.Actinobacteria.id.400     |

|      | A           | B | C | D            | E           | F        | G     | H                            |
|------|-------------|---|---|--------------|-------------|----------|-------|------------------------------|
| 2449 | rs34284163  | T | A | -0.060331227 | 0.013685143 | 8.82E-06 | 17987 | phylum.Actinobacteria.id.400 |
| 2450 | rs9833771   | C | T | 0.049007706  | 0.010656419 | 4.07E-06 | 17990 | phylum.Actinobacteria.id.400 |
| 2451 | rs1397793   | A | G | -0.052138694 | 0.011158738 | 3.74E-06 | 17782 | phylum.Actinobacteria.id.400 |
| 2452 | rs6496870   | C | T | 0.05107769   | 0.011380876 | 4.62E-06 | 17990 | phylum.Actinobacteria.id.400 |
| 2453 | rs857444    | T | C | 0.050731493  | 0.010988454 | 3.80E-06 | 17988 | phylum.Actinobacteria.id.400 |
| 2454 | rs12528285  | T | C | 0.08094693   | 0.018078413 | 5.69E-06 | 17990 | phylum.Actinobacteria.id.400 |
| 2455 | rs80124826  | C | T | -0.124191142 | 0.027856576 | 8.75E-06 | 11999 | phylum.Actinobacteria.id.400 |
| 2456 | rs13192624  | C | T | -0.052286185 | 0.011774241 | 9.33E-06 | 17985 | phylum.Actinobacteria.id.400 |
| 2457 | rs75211493  | A | G | 0.084078593  | 0.018473851 | 9.27E-06 | 16605 | phylum.Actinobacteria.id.400 |
| 2458 | rs6743026   | C | T | 0.058944616  | 0.013462245 | 9.88E-06 | 17875 | phylum.Actinobacteria.id.400 |
| 2459 | rs11766971  | C | T | 0.047637595  | 0.010646046 | 9.40E-06 | 17987 | phylum.Actinobacteria.id.400 |
| 2460 | rs73846128  | G | A | -0.066426181 | 0.013348134 | 4.78E-07 | 18335 | phylum.Bacteroidetes.id.905  |
| 2461 | rs73512608  | A | G | -0.123117207 | 0.02367433  | 2.54E-07 | 11350 | phylum.Bacteroidetes.id.905  |
| 2462 | rs111845179 | C | T | 0.104176948  | 0.021383712 | 6.47E-07 | 16394 | phylum.Bacteroidetes.id.905  |
| 2463 | rs73975615  | A | G | -0.207162752 | 0.044262873 | 1.20E-06 | 3350  | phylum.Bacteroidetes.id.905  |
| 2464 | rs2032750   | C | T | -0.051085659 | 0.010680423 | 1.71E-06 | 17854 | phylum.Bacteroidetes.id.905  |
| 2465 | rs13291169  | G | C | 0.070092873  | 0.014875617 | 2.61E-06 | 17514 | phylum.Bacteroidetes.id.905  |
| 2466 | rs17343978  | C | A | -0.055604102 | 0.012027223 | 7.22E-06 | 18335 | phylum.Bacteroidetes.id.905  |
| 2467 | rs929878    | T | C | -0.054000099 | 0.012152588 | 6.51E-06 | 18335 | phylum.Bacteroidetes.id.905  |
| 2468 | rs72706335  | C | T | -0.223193178 | 0.049338227 | 7.13E-06 | 3820  | phylum.Bacteroidetes.id.905  |
| 2469 | rs7999780   | A | G | 0.054363486  | 0.01240667  | 9.47E-06 | 18325 | phylum.Bacteroidetes.id.905  |
| 2470 | rs6586324   | C | T | 0.047779239  | 0.010543692 | 7.37E-06 | 18332 | phylum.Bacteroidetes.id.905  |
| 2471 | rs62531359  | G | T | 0.06577884   | 0.014988611 | 8.42E-06 | 18321 | phylum.Bacteroidetes.id.905  |
| 2472 | rs62575403  | T | C | 0.145423872  | 0.031107867 | 2.96E-06 | 9669  | phylum.Bacteroidetes.id.905  |
| 2473 | rs789068    | A | G | -0.111384961 | 0.021292193 | 1.57E-07 | 7110  | phylum.Cyanobacteria.id.1500 |
| 2474 | rs9864379   | C | T | -0.138933303 | 0.026804476 | 2.03E-07 | 6922  | phylum.Cyanobacteria.id.1500 |
| 2475 | rs76531781  | C | T | -0.231867725 | 0.049339267 | 2.87E-06 | 3658  | phylum.Cyanobacteria.id.1500 |
| 2476 | rs7148504   | T | G | 0.080040381  | 0.017662085 | 6.62E-06 | 7118  | phylum.Cyanobacteria.id.1500 |
| 2477 | rs584122    | T | C | -0.151773535 | 0.032682655 | 4.23E-06 | 6922  | phylum.Cyanobacteria.id.1500 |
| 2478 | rs2314810   | G | C | -0.2182567   | 0.046457143 | 4.25E-06 | 3934  | phylum.Cyanobacteria.id.1500 |
| 2479 | rs2553290   | T | A | 0.096213138  | 0.02026167  | 3.61E-06 | 7113  | phylum.Cyanobacteria.id.1500 |
| 2480 | rs12555298  | A | G | 0.097432733  | 0.021935139 | 8.09E-06 | 7096  | phylum.Cyanobacteria.id.1500 |
| 2481 | rs2585223   | C | T | 0.111364409  | 0.024774324 | 8.86E-06 | 6911  | phylum.Cyanobacteria.id.1500 |
| 2482 | rs61972390  | C | T | 0.107345656  | 0.024246867 | 9.11E-06 | 6486  | phylum.Cyanobacteria.id.1500 |
| 2483 | rs76029318  | C | T | 0.214866479  | 0.043844209 | 1.05E-06 | 3660  | phylum.Euryarchaeota.id.55   |
| 2484 | rs73031978  | G | C | -0.19752268  | 0.04144971  | 2.74E-06 | 3501  | phylum.Euryarchaeota.id.55   |
| 2485 | rs34928225  | C | T | 0.199769775  | 0.042542135 | 4.33E-06 | 3483  | phylum.Euryarchaeota.id.55   |
| 2486 | rs7635189   | A | G | 0.119983324  | 0.0259356   | 4.64E-06 | 3483  | phylum.Euryarchaeota.id.55   |
| 2487 | rs77658038  | C | A | -0.160156679 | 0.034085617 | 4.75E-06 | 3810  | phylum.Euryarchaeota.id.55   |
| 2488 | rs894996    | A | C | 0.203576769  | 0.044003319 | 5.12E-06 | 3746  | phylum.Euryarchaeota.id.55   |
| 2489 | rs56131665  | A | G | 0.176758917  | 0.038578653 | 5.30E-06 | 3736  | phylum.Euryarchaeota.id.55   |
| 2490 | rs45498998  | A | G | -0.131882333 | 0.029228979 | 5.32E-06 | 3850  | phylum.Euryarchaeota.id.55   |
| 2491 | rs7015093   | A | G | -0.118111053 | 0.02643893  | 7.20E-06 | 3855  | phylum.Euryarchaeota.id.55   |
| 2492 | rs11022995  | A | G | -0.103729602 | 0.022888851 | 7.73E-06 | 3864  | phylum.Euryarchaeota.id.55   |
| 2493 | rs6508769   | C | T | 0.150528693  | 0.033709102 | 8.12E-06 | 3483  | phylum.Euryarchaeota.id.55   |
| 2494 | rs6064552   | C | T | -0.123611632 | 0.02757488  | 9.34E-06 | 3775  | phylum.Euryarchaeota.id.55   |
| 2495 | rs3792064   | A | G | 0.089734864  | 0.018253212 | 6.75E-07 | 17812 | phylum.Firmicutes.id.1672    |
| 2496 | rs2009919   | C | T | 0.053645718  | 0.010629448 | 4.95E-07 | 17859 | phylum.Firmicutes.id.1672    |
| 2497 | rs112334273 | A | G | 0.062745897  | 0.012741527 | 9.26E-07 | 18217 | phylum.Firmicutes.id.1672    |
| 2498 | rs13421739  | G | C | 0.094394435  | 0.017964144 | 1.95E-06 | 18340 | phylum.Firmicutes.id.1672    |
| 2499 | rs7975768   | G | C | 0.051273172  | 0.010922627 | 2.82E-06 | 17859 | phylum.Firmicutes.id.1672    |

|      | A          | B | C | D            | E           | F        | G     | H                             |
|------|------------|---|---|--------------|-------------|----------|-------|-------------------------------|
| 2500 | rs2332027  | A | G | -0.048265611 | 0.010482301 | 4.05E-06 | 18340 | phylum.Firmicutes.id.1672     |
| 2501 | rs2273429  | G | A | -0.070211154 | 0.01530628  | 9.26E-06 | 18337 | phylum.Firmicutes.id.1672     |
| 2502 | rs7247191  | C | T | -0.071303301 | 0.015742403 | 4.73E-06 | 18340 | phylum.Firmicutes.id.1672     |
| 2503 | rs72771021 | T | C | -0.141356654 | 0.030830333 | 5.12E-06 | 9068  | phylum.Firmicutes.id.1672     |
| 2504 | rs3852931  | T | C | -0.048208647 | 0.010499991 | 4.53E-06 | 18260 | phylum.Firmicutes.id.1672     |
| 2505 | rs2547978  | G | A | 0.046580183  | 0.010507469 | 8.57E-06 | 18338 | phylum.Firmicutes.id.1672     |
| 2506 | rs36111799 | T | C | -0.04807078  | 0.010542949 | 5.17E-06 | 18226 | phylum.Firmicutes.id.1672     |
| 2507 | rs12554342 | C | G | -0.052570302 | 0.01169079  | 6.81E-06 | 18332 | phylum.Firmicutes.id.1672     |
| 2508 | rs72738886 | C | T | 0.086460893  | 0.019039766 | 7.68E-06 | 16934 | phylum.Firmicutes.id.1672     |
| 2509 | rs4750583  | G | A | 0.061600686  | 0.013793602 | 5.79E-06 | 16934 | phylum.Firmicutes.id.1672     |
| 2510 | rs6815608  | C | T | 0.093576464  | 0.021086864 | 7.24E-06 | 16731 | phylum.Firmicutes.id.1672     |
| 2511 | rs8085381  | A | G | 0.064729115  | 0.014621949 | 8.67E-06 | 18339 | phylum.Firmicutes.id.1672     |
| 2512 | rs56199908 | C | T | -0.186193968 | 0.041050975 | 8.67E-06 | 5618  | phylum.Firmicutes.id.1672     |
| 2513 | rs7573799  | G | C | -0.069844604 | 0.015393468 | 8.05E-06 | 17859 | phylum.Firmicutes.id.1672     |
| 2514 | rs6814436  | C | T | 0.068020505  | 0.015084366 | 6.80E-06 | 18336 | phylum.Firmicutes.id.1672     |
| 2515 | rs2825714  | G | A | -0.138226357 | 0.028909621 | 1.50E-06 | 4739  | phylum.Lentisphaerae.id.2238  |
| 2516 | rs11770843 | T | C | 0.111895531  | 0.023477604 | 1.14E-06 | 4709  | phylum.Lentisphaerae.id.2238  |
| 2517 | rs77599476 | G | A | 0.229981464  | 0.047991818 | 1.90E-06 | 3726  | phylum.Lentisphaerae.id.2238  |
| 2518 | rs62570196 | T | C | -0.217203229 | 0.043962139 | 9.64E-07 | 3716  | phylum.Lentisphaerae.id.2238  |
| 2519 | rs72640280 | G | A | 0.220185072  | 0.048594661 | 5.19E-06 | 3820  | phylum.Lentisphaerae.id.2238  |
| 2520 | rs17114848 | A | G | 0.148972108  | 0.032416219 | 6.77E-06 | 4739  | phylum.Lentisphaerae.id.2238  |
| 2521 | rs1002941  | A | G | 0.107660547  | 0.023338177 | 4.31E-06 | 4739  | phylum.Lentisphaerae.id.2238  |
| 2522 | rs2731834  | G | C | 0.109934636  | 0.023684845 | 3.80E-06 | 4738  | phylum.Lentisphaerae.id.2238  |
| 2523 | rs60995569 | G | T | -0.160620002 | 0.033680552 | 9.19E-06 | 4737  | phylum.Lentisphaerae.id.2238  |
| 2524 | rs2031282  | G | A | 0.120411947  | 0.027026292 | 5.86E-06 | 4739  | phylum.Lentisphaerae.id.2238  |
| 2525 | rs73113483 | A | T | -0.131681316 | 0.028850337 | 8.79E-06 | 4723  | phylum.Lentisphaerae.id.2238  |
| 2526 | rs922773   | T | C | -0.080377814 | 0.015785107 | 3.68E-07 | 18132 | phylum.Proteobacteria.id.2375 |
| 2527 | rs2532663  | A | G | -0.125578004 | 0.025803359 | 7.47E-07 | 13013 | phylum.Proteobacteria.id.2375 |
| 2528 | rs12150865 | T | C | 0.051161535  | 0.010640719 | 1.54E-06 | 17769 | phylum.Proteobacteria.id.2375 |
| 2529 | rs2347697  | T | G | 0.050228084  | 0.010896783 | 4.27E-06 | 18248 | phylum.Proteobacteria.id.2375 |
| 2530 | rs312757   | G | C | -0.051726884 | 0.011285376 | 4.84E-06 | 18250 | phylum.Proteobacteria.id.2375 |
| 2531 | rs12467198 | T | C | 0.049826716  | 0.011137964 | 6.31E-06 | 18238 | phylum.Proteobacteria.id.2375 |
| 2532 | rs10750258 | C | A | -0.049124751 | 0.010824018 | 8.72E-06 | 18250 | phylum.Proteobacteria.id.2375 |
| 2533 | rs6707783  | T | C | 0.084959348  | 0.018778235 | 8.09E-06 | 17324 | phylum.Proteobacteria.id.2375 |
| 2534 | rs72771021 | T | C | 0.141725865  | 0.03092421  | 7.18E-06 | 9009  | phylum.Proteobacteria.id.2375 |
| 2535 | rs3890996  | G | T | -0.047461372 | 0.010564451 | 6.95E-06 | 18120 | phylum.Proteobacteria.id.2375 |
| 2536 | rs74757828 | T | A | 0.095128506  | 0.021692115 | 9.25E-06 | 16634 | phylum.Proteobacteria.id.2375 |
| 2537 | rs4340090  | T | C | -0.066816186 | 0.015338746 | 9.99E-06 | 18250 | phylum.Proteobacteria.id.2375 |
| 2538 | rs11715072 | A | G | -0.051928888 | 0.01152464  | 6.90E-06 | 18249 | phylum.Proteobacteria.id.2375 |
| 2539 | rs11126162 | C | T | -0.077068857 | 0.018707864 | 9.26E-06 | 18250 | phylum.Proteobacteria.id.2375 |
| 2540 | rs74603314 | C | T | 0.221639279  | 0.046291765 | 1.56E-06 | 4499  | phylum.Tenericutes.id.3919    |
| 2541 | rs10108398 | A | G | 0.076914215  | 0.015395275 | 1.09E-06 | 10932 | phylum.Tenericutes.id.3919    |
| 2542 | rs11890098 | G | A | 0.074438031  | 0.015338858 | 9.57E-07 | 11392 | phylum.Tenericutes.id.3919    |
| 2543 | rs72901605 | C | T | -0.084185237 | 0.01781192  | 3.26E-06 | 10526 | phylum.Tenericutes.id.3919    |
| 2544 | rs3768491  | G | A | -0.068105197 | 0.01490611  | 4.23E-06 | 11002 | phylum.Tenericutes.id.3919    |
| 2545 | rs17214486 | A | C | 0.060989958  | 0.013562263 | 6.61E-06 | 11387 | phylum.Tenericutes.id.3919    |
| 2546 | rs12566890 | G | T | -0.101147132 | 0.023097845 | 3.65E-06 | 11371 | phylum.Tenericutes.id.3919    |
| 2547 | rs78169027 | G | A | -0.108282943 | 0.023728915 | 5.88E-06 | 10542 | phylum.Tenericutes.id.3919    |
| 2548 | rs4885016  | C | T | -0.081960567 | 0.018162779 | 7.27E-06 | 11388 | phylum.Tenericutes.id.3919    |
| 2549 | rs28537087 | A | G | 0.08208727   | 0.018831168 | 8.07E-06 | 11382 | phylum.Tenericutes.id.3919    |
| 2550 | rs2464826  | C | A | 0.094423946  | 0.021180616 | 8.40E-06 | 10998 | phylum.Tenericutes.id.3919    |

|      | A           | B | C | D            | E           | F        | G     | H                              |
|------|-------------|---|---|--------------|-------------|----------|-------|--------------------------------|
| 2551 | rs6043847   | C | T | -0.11493717  | 0.024860602 | 4.55E-06 | 11130 | phylum.Tenericutes.id.3919     |
| 2552 | rs74542928  | C | T | 0.115994333  | 0.023132372 | 4.08E-07 | 11703 | phylum.Verrucomicrobia.id.3982 |
| 2553 | rs11252894  | C | A | 0.078405494  | 0.016276917 | 1.11E-06 | 12381 | phylum.Verrucomicrobia.id.3982 |
| 2554 | rs2602429   | T | C | 0.076414823  | 0.015348672 | 8.71E-07 | 12104 | phylum.Verrucomicrobia.id.3982 |
| 2555 | rs11729256  | C | T | 0.069698414  | 0.01469534  | 2.23E-06 | 12377 | phylum.Verrucomicrobia.id.3982 |
| 2556 | rs45598138  | A | C | -0.143901454 | 0.030540001 | 2.19E-06 | 9932  | phylum.Verrucomicrobia.id.3982 |
| 2557 | rs61779207  | A | G | -0.075525262 | 0.016438461 | 5.28E-06 | 12087 | phylum.Verrucomicrobia.id.3982 |
| 2558 | rs76430504  | C | T | -0.117530089 | 0.025458042 | 3.50E-06 | 11624 | phylum.Verrucomicrobia.id.3982 |
| 2559 | rs9349825   | G | A | -0.066024311 | 0.014391139 | 6.27E-06 | 12373 | phylum.Verrucomicrobia.id.3982 |
| 2560 | rs117107102 | G | A | 0.204282775  | 0.042756505 | 2.68E-06 | 5071  | phylum.Verrucomicrobia.id.3982 |
| 2561 | rs3995795   | T | C | 0.061091431  | 0.013859187 | 9.72E-06 | 12104 | phylum.Verrucomicrobia.id.3982 |
| 2562 | rs12908520  | A | G | 0.059491573  | 0.012823012 | 3.40E-06 | 12380 | phylum.Verrucomicrobia.id.3982 |
| 2563 | rs12512971  | C | A | 0.171056895  | 0.03980534  | 9.81E-06 | 3919  | phylum.Verrucomicrobia.id.3982 |















































































































|      | A      | B      | C    | D                            | E                         | F  | G            | H           | I           | J           | K            | L            | M           | N           | O           | P                   |
|------|--------|--------|------|------------------------------|---------------------------|----|--------------|-------------|-------------|-------------|--------------|--------------|-------------|-------------|-------------|---------------------|
| 3906 | gkAVOW | 1SSbcA | COPD | phylum.Lentisphaerae.id.2238 | Simple mode               | 9  | 0.070860703  | 0.089829932 | 0.452950893 |             | -0.105205964 | 0.246927369  | 1.073431689 | 0.900139107 | 1.280086136 | 1.073 (0.9-1.28)    |
| 3907 | gkAVOW | 1SSbcA | COPD | phylum.Lentisphaerae.id.2238 | Weighted mode             | 9  | 0.07352575   | 0.086476742 | 0.419910125 |             | -0.095968664 | 0.243020164  | 1.076296251 | 0.908492484 | 1.275094335 | 1.076 (0.908-1.275) |
| 3908 | II0qrp | 1SSbcA | COPD | phylum.Actinobacteria.id.400 | MR Egger                  | 13 | -0.144128971 | 0.353138216 | 0.691004475 |             | -0.836279875 | 0.548021933  | 0.865776081 | 0.433319532 | 1.729827917 | 0.866 (0.433-1.73)  |
| 3909 | II0qrp | 1SSbcA | COPD | phylum.Actinobacteria.id.400 | Weighted median           | 13 | -0.094900248 | 0.094610634 | 0.315831379 |             | -0.280337091 | 0.090536596  | 0.909463651 | 0.755529017 | 1.09476157  | 0.909 (0.756-1.095) |
| 3910 | II0qrp | 1SSbcA | COPD | phylum.Actinobacteria.id.400 | Inverse variance weighted | 13 | -0.076526579 | 0.06885869  | 0.266414763 | 0.479546574 | -0.211489612 | 0.058436453  | 0.926328293 | 0.809377689 | 1.060177613 | 0.926 (0.809-1.06)  |
| 3911 | II0qrp | 1SSbcA | COPD | phylum.Actinobacteria.id.400 | Simple mode               | 13 | -0.112200725 | 0.168093249 | 0.517089806 |             | -0.441663494 | 0.217262043  | 0.893864818 | 0.642965961 | 1.242669693 | 0.894 (0.643-1.243) |
| 3912 | II0qrp | 1SSbcA | COPD | phylum.Actinobacteria.id.400 | Weighted mode             | 13 | -0.119663077 | 0.158647569 | 0.465231809 |             | -0.430612313 | 0.191286158  | 0.887219311 | 0.650110901 | 1.210805884 | 0.887 (0.65-1.211)  |
| 3913 | oChqj7 | 1SSbcA | COPD | phylum.Bacteroidetes.id.905  | MR Egger                  | 10 | -0.394778559 | 0.192661004 | 0.074614229 |             | -0.772394126 | -0.017162992 | 0.673829236 | 0.461905883 | 0.982983453 | 0.674 (0.462-0.983) |
| 3914 | oChqj7 | 1SSbcA | COPD | phylum.Bacteroidetes.id.905  | Weighted median           | 10 | -0.073616474 | 0.111604113 | 0.509496745 |             | -0.292360535 | 0.145127587  | 0.929027932 | 0.746499348 | 1.156187076 | 0.929 (0.746-1.156) |
| 3915 | oChqj7 | 1SSbcA | COPD | phylum.Bacteroidetes.id.905  | Inverse variance weighted | 10 | -0.147426362 | 0.073974038 | 0.046267216 | 0.271593967 | -0.292415477 | -0.002437246 | 0.86292598  | 0.746458335 | 0.997565721 | 0.863 (0.746-0.998) |
| 3916 | oChqj7 | 1SSbcA | COPD | phylum.Bacteroidetes.id.905  | Simple mode               | 10 | 0.03388088   | 0.211639001 | 0.876347104 |             | -0.380931561 | 0.448693322  | 1.034461375 | 0.683224647 | 1.566264245 | 1.034 (0.683-1.566) |
| 3917 | oChqj7 | 1SSbcA | COPD | phylum.Bacteroidetes.id.905  | Weighted mode             | 10 | -0.028667681 | 0.189046407 | 0.882812832 |             | -0.399198639 | 0.341863276  | 0.971739338 | 0.67085743  | 1.407567836 | 0.972 (0.671-1.408) |
| 3918 | PcT6eJ | 1SSbcA | COPD | phylum.Cyanobacteria.id.1500 | MR Egger                  | 8  | -0.050811807 | 0.186451688 | 0.794358251 |             | -0.416257116 | 0.314633503  | 0.950457524 | 0.659510678 | 1.369757207 | 0.95 (0.66-1.37)    |
| 3919 | PcT6eJ | 1SSbcA | COPD | phylum.Cyanobacteria.id.1500 | Weighted median           | 8  | -0.089728539 | 0.066625311 | 0.178056401 |             | -0.220314148 | 0.04085707   | 0.914179316 | 0.802266728 | 1.041703204 | 0.914 (0.802-1.042) |
| 3920 | PcT6eJ | 1SSbcA | COPD | phylum.Cyanobacteria.id.1500 | Inverse variance weighted | 8  | -0.065233309 | 0.052418861 | 0.213329384 | 0.479546574 | -0.167974277 | 0.03750766   | 0.936848863 | 0.84537558  | 1.03821995  | 0.937 (0.845-1.038) |
| 3921 | PcT6eJ | 1SSbcA | COPD | phylum.Cyanobacteria.id.1500 | Simple mode               | 8  | -0.147426464 | 0.110462208 | 0.223771139 |             | -0.363932391 | 0.069079464  | 0.862925892 | 0.694938177 | 1.071521353 | 0.863 (0.695-1.072) |
| 3922 | PcT6eJ | 1SSbcA | COPD | phylum.Cyanobacteria.id.1500 | Weighted mode             | 8  | -0.147426464 | 0.10885273  | 0.217708783 |             | -0.360777815 | 0.065924888  | 0.862925892 | 0.697133874 | 1.068146483 | 0.863 (0.697-1.068) |













|     | A      | B      | C    | D                              | E                         | F  | G            | H           | I           | J           | K            | L            | M           | N           | O           | P                |
|-----|--------|--------|------|--------------------------------|---------------------------|----|--------------|-------------|-------------|-------------|--------------|--------------|-------------|-------------|-------------|------------------|
| 307 | XVFzMF | 1SSbcA | COPD | genus.Holdemania.id.2157       | Weighted mode             | 13 | -0.150550611 | 0.090367759 | 0.121586478 |             | -0.327671419 | 0.026570196  | 0.860234191 | 0.720599756 | 1.026926331 | 0.86 (0.72-1.03) |
| 308 | obtxsV | 1SSbcA | COPD | family.Veillonellaceae.id.2172 | MR Egger                  | 18 | -0.134958829 | 0.117503165 | 0.267621601 |             | -0.365265033 | 0.095347374  | 0.873751884 | 0.69401269  | 1.100040915 | 0.87 (0.69-1.1)  |
| 309 | obtxsV | 1SSbcA | COPD | family.Veillonellaceae.id.2172 | Weighted median           | 18 | -0.031315389 | 0.070164925 | 0.655372502 |             | -0.168838642 | 0.106207865  | 0.96916986  | 0.844645182 | 1.112053009 | 0.97 (0.84-1.11) |
| 310 | obtxsV | 1SSbcA | COPD | family.Veillonellaceae.id.2172 | Inverse variance weighted | 18 | -0.1134166   | 0.046498544 | 0.014722139 | 0.235554223 | -0.204553746 | -0.022279454 | 0.892778651 | 0.815010937 | 0.9779669   | 0.89 (0.82-0.98) |
| 311 | obtxsV | 1SSbcA | COPD | family.Veillonellaceae.id.2172 | Simple mode               | 18 | -0.184394436 | 0.119219996 | 0.140354727 |             | -0.418065629 | 0.049276756  | 0.831607723 | 0.658319022 | 1.050511046 | 0.83 (0.66-1.05) |
| 312 | obtxsV | 1SSbcA | COPD | family.Veillonellaceae.id.2172 | Weighted mode             | 18 | -0.040206674 | 0.089593161 | 0.659265784 |             | -0.21580927  | 0.135395922  | 0.96059089  | 0.805888995 | 1.144990022 | 0.96 (0.81-1.14) |
| 313 | ylev3A | 1SSbcA | COPD | family.FamilyXIII.id.1957      | MR Egger                  | 7  | -0.165629673 | 0.333545652 | 0.640548804 |             | -0.819379152 | 0.488119805  | 0.847359976 | 0.440705181 | 1.629250031 | 0.85 (0.44-1.63) |
| 314 | ylev3A | 1SSbcA | COPD | family.FamilyXIII.id.1957      | Weighted median           | 7  | -0.235352112 | 0.115645952 | 0.041839912 |             | -0.462018179 | -0.008686046 | 0.790292529 | 0.630010887 | 0.991351569 | 0.79 (0.63-0.99) |
| 315 | ylev3A | 1SSbcA | COPD | family.FamilyXIII.id.1957      | Inverse variance weighted | 7  | -0.287416278 | 0.089502412 | 0.001321504 | 0.042288126 | -0.462841006 | -0.11199155  | 0.750199372 | 0.62949271  | 0.894051812 | 0.75 (0.63-0.89) |
| 316 | ylev3A | 1SSbcA | COPD | family.FamilyXIII.id.1957      | Simple mode               | 7  | -0.232424914 | 0.15469415  | 0.183658884 |             | -0.535625447 | 0.070775619  | 0.792609261 | 0.585303099 | 1.073340362 | 0.79 (0.59-1.07) |
| 317 | ylev3A | 1SSbcA | COPD | family.FamilyXIII.id.1957      | Weighted mode             | 7  | -0.232424914 | 0.158369376 | 0.192582914 |             | -0.542828891 | 0.077979063  | 0.792609261 | 0.581102051 | 1.081100023 | 0.79 (0.58-1.08) |
| 318 | tSliO9 | 1SSbcA | COPD | order.Bacteroidales.id.913     | MR Egger                  | 12 | -0.380352726 | 0.185359117 | 0.067285192 |             | -0.743656594 | -0.017048857 | 0.683620236 | 0.475372489 | 0.983095653 | 0.68 (0.48-0.98) |
| 319 | tSliO9 | 1SSbcA | COPD | order.Bacteroidales.id.913     | Weighted median           | 12 | -0.237658145 | 0.104310595 | 0.022704534 |             | -0.442106911 | -0.033209379 | 0.788472188 | 0.642680922 | 0.967335999 | 0.79 (0.64-0.97) |
| 320 | tSliO9 | 1SSbcA | COPD | order.Bacteroidales.id.913     | Inverse variance weighted | 12 | -0.161636112 | 0.069446345 | 0.019938864 | 0.398777288 | -0.297750947 | -0.025521276 | 0.850750726 | 0.742486235 | 0.974801639 | 0.85 (0.74-0.97) |
| 321 | tSliO9 | 1SSbcA | COPD | order.Bacteroidales.id.913     | Simple mode               | 12 | 0.047042891  | 0.185896633 | 0.80488926  |             | -0.317314509 | 0.411400291  | 1.048166965 | 0.728101725 | 1.508929247 | 1.05 (0.73-1.51) |
| 322 | tSliO9 | 1SSbcA | COPD | order.Bacteroidales.id.913     | Weighted mode             | 12 | -0.26276633  | 0.176316536 | 0.164248692 |             | -0.608346742 | 0.082814081  | 0.76892155  | 0.544249911 | 1.086339819 | 0.77 (0.54-1.09) |
| 323 | UTPK2n | 1SSbcA | COPD | class.Bacteroidia.id.912       | MR Egger                  | 12 | -0.380352726 | 0.185359117 | 0.067285192 |             | -0.743656594 | -0.017048857 | 0.683620236 | 0.475372489 | 0.983095653 | 0.68 (0.48-0.98) |
| 324 | UTPK2n | 1SSbcA | COPD | class.Bacteroidia.id.912       | Weighted median           | 12 | -0.237658145 | 0.098176076 | 0.015489216 |             | -0.430083254 | -0.045233036 | 0.788472188 | 0.650454939 | 0.955774726 | 0.79 (0.65-0.96) |
| 325 | UTPK2n | 1SSbcA | COPD | class.Bacteroidia.id.912       | Inverse variance weighted | 12 | -0.161636112 | 0.069446345 | 0.019938864 | 0.31902183  | -0.297750947 | -0.025521276 | 0.850750726 | 0.742486235 | 0.974801639 | 0.85 (0.74-0.97) |
| 326 | UTPK2n | 1SSbcA | COPD | class.Bacteroidia.id.912       | Simple mode               | 12 | 0.047042891  | 0.199044147 | 0.817508951 |             | -0.343083636 | 0.437169419  | 1.048166965 | 0.709578863 | 1.548318369 | 1.05 (0.71-1.55) |
| 327 | UTPK2n | 1SSbcA | COPD | class.Bacteroidia.id.912       | Weighted mode             | 12 | -0.26276633  | 0.169251932 | 0.148818448 |             | -0.594500117 | 0.068967456  | 0.76892155  | 0.551838352 | 1.071401341 | 0.77 (0.55-1.07) |
| 328 | oChqj7 | 1SSbcA | COPD | phylum.Bacteroidetes.id.905    | MR Egger                  | 10 | -0.394778559 | 0.192661004 | 0.074614229 |             | -0.772394126 | -0.017162992 | 0.673829236 | 0.461905883 | 0.982983453 | 0.67 (0.46-0.98) |
| 329 | oChqj7 | 1SSbcA | COPD | phylum.Bacteroidetes.id.905    | Weighted median           | 10 | -0.073616474 | 0.111604113 | 0.509496745 |             | -0.292360535 | 0.145127587  | 0.929027932 | 0.746499348 | 1.156187076 | 0.93 (0.75-1.16) |
| 330 | oChqj7 | 1SSbcA | COPD | phylum.Bacteroidetes.id.905    | Inverse variance weighted | 10 | -0.147426362 | 0.073974038 | 0.046267216 | 0.271593967 | -0.292415477 | -0.002437246 | 0.86292598  | 0.746458335 | 0.997565721 | 0.86 (0.75-1)    |
| 331 | oChqj7 | 1SSbcA | COPD | phylum.Bacteroidetes.id.905    | Simple mode               | 10 | 0.03388088   | 0.211639001 | 0.876347104 |             | -0.380931561 | 0.448693322  | 1.034461375 | 0.683224647 | 1.566264245 | 1.03 (0.68-1.57) |
| 332 | oChqj7 | 1SSbcA | COPD | phylum.Bacteroidetes.id.905    | Weighted mode             | 10 | -0.028667681 | 0.189046407 | 0.882812832 |             | -0.399198639 | 0.341863276  | 0.971739338 | 0.67085743  | 1.407567836 | 0.97 (0.67-1.41) |

|    | A                                                                            | B                                           | C                 | D                     | E           | F            | G           | H                    | I       |
|----|------------------------------------------------------------------------------|---------------------------------------------|-------------------|-----------------------|-------------|--------------|-------------|----------------------|---------|
| 1  | Supplementary table S5: Results of horizontal pleiotropy tests via MR-PRESSO |                                             |                   |                       |             |              |             |                      |         |
| 2  | Outcome                                                                      | Exposure                                    | MR Analysis       | Causal Estimate       | Sd          | T-stat       | P-value     | Outlier              | globalP |
| 3  | Forced expiratory volume in 1-second (FEV1), Best measure                    | class.Actinobacteria.id.419                 | Raw               | -0.0156481472540374   | 0.012501474 | -1.251704139 | 0.23452749  |                      |         |
| 4  | Forced expiratory volume in 1-second (FEV1), Best measure                    | class.Actinobacteria.id.419                 | Outlier-corrected |                       |             |              |             |                      | 0.133   |
| 5  | Forced expiratory volume in 1-second (FEV1), Best measure                    | class.Alphaproteobacteria.id.2379           | Raw               | 0.00950868909091277   | 0.009756502 | 0.974600188  | 0.367397523 |                      |         |
| 6  | Forced expiratory volume in 1-second (FEV1), Best measure                    | class.Alphaproteobacteria.id.2379           | Outlier-corrected |                       |             |              |             |                      | 0.616   |
| 7  | Forced expiratory volume in 1-second (FEV1), Best measure                    | class.Bacilli.id.1673                       | Raw               | -0.0162517510019395   | 0.008754161 | -1.856460235 | 0.081898313 |                      |         |
| 8  | Forced expiratory volume in 1-second (FEV1), Best measure                    | class.Bacilli.id.1673                       | Outlier-corrected |                       |             |              |             |                      | 0.47    |
| 9  | Forced expiratory volume in 1-second (FEV1), Best measure                    | class.Bacteroidia.id.912                    | Raw               | -0.012058803632462    | 0.016435304 | -0.733713434 | 0.479971743 |                      |         |
| 10 | Forced expiratory volume in 1-second (FEV1), Best measure                    | class.Bacteroidia.id.912                    | Outlier-corrected |                       |             |              |             |                      | 0.096   |
| 11 | Forced expiratory volume in 1-second (FEV1), Best measure                    | class.Betaproteobacteria.id.2867            | Raw               | 0.0166833653015548    | 0.019946761 | 0.836394707  | 0.420731113 |                      |         |
| 12 | Forced expiratory volume in 1-second (FEV1), Best measure                    | class.Betaproteobacteria.id.2867            | Outlier-corrected | 0.0186409745846312    | 0.013419424 | 1.38910394   | 0.198208046 | rs11128180,rs6087811 | 0.001   |
| 13 | Forced expiratory volume in 1-second (FEV1), Best measure                    | class.Clostridia.id.1859                    | Raw               | 0.0435714970021863    | 0.012638396 | 3.447549526  | 0.005451565 |                      |         |
| 14 | Forced expiratory volume in 1-second (FEV1), Best measure                    | class.Clostridia.id.1859                    | Outlier-corrected |                       |             |              |             |                      | 0.364   |
| 15 | Forced expiratory volume in 1-second (FEV1), Best measure                    | class.Coriobacteriia.id.809                 | Raw               | 0.00417184639146536   | 0.019832982 | 0.21034892   | 0.836656411 |                      |         |
| 16 | Forced expiratory volume in 1-second (FEV1), Best measure                    | class.Coriobacteriia.id.809                 | Outlier-corrected | 0.00367865886829212   | 0.017307735 | 0.212544214  | 0.835569874 | rs2442778,rs34739816 | <0.001  |
| 17 | Forced expiratory volume in 1-second (FEV1), Best measure                    | class.Deltaproteobacteria.id.3087           | Raw               | 0.0343118597933834    | 0.008831781 | 3.885044368  | 0.002167981 |                      |         |
| 18 | Forced expiratory volume in 1-second (FEV1), Best measure                    | class.Deltaproteobacteria.id.3087           | Outlier-corrected |                       |             |              |             |                      | 0.642   |
| 19 | Forced expiratory volume in 1-second (FEV1), Best measure                    | class.Erysipelotrichia.id.2147              | Raw               | 0.0311074758664724    | 0.011108852 | 2.800242246  | 0.016037042 |                      |         |
| 20 | Forced expiratory volume in 1-second (FEV1), Best measure                    | class.Erysipelotrichia.id.2147              | Outlier-corrected |                       |             |              |             |                      | 0.469   |
| 21 | Forced expiratory volume in 1-second (FEV1), Best measure                    | class.Gammaproteobacteria.id.3303           | Raw               | 0.0132658913914204    | 0.0126419   | 1.049358972  | 0.334430425 |                      |         |
| 22 | Forced expiratory volume in 1-second (FEV1), Best measure                    | class.Gammaproteobacteria.id.3303           | Outlier-corrected |                       |             |              |             |                      | 0.562   |
| 23 | Forced expiratory volume in 1-second (FEV1), Best measure                    | class.Lentisphaeria.id.2250                 | Raw               | -0.00287219292505578  | 0.010621069 | -0.270424087 | 0.794633695 |                      |         |
| 24 | Forced expiratory volume in 1-second (FEV1), Best measure                    | class.Lentisphaeria.id.2250                 | Outlier-corrected | -0.00958954317040308  | 0.009222087 | -1.039845177 | 0.338488236 | rs2825714            | 0.024   |
| 25 | Forced expiratory volume in 1-second (FEV1), Best measure                    | class.Melainabacteria.id.1589               | Raw               | 0.0110457927364098    | 0.012142981 | 0.909644239  | 0.386722359 |                      |         |
| 26 | Forced expiratory volume in 1-second (FEV1), Best measure                    | class.Melainabacteria.id.1589               | Outlier-corrected | 0.00124836723855385   | 0.009963058 | 0.125299602  | 0.903377881 | rs79790072           | 0.002   |
| 27 | Forced expiratory volume in 1-second (FEV1), Best measure                    | class.Methanobacteria.id.119                | Raw               | 0.00547855384468051   | 0.006852712 | 0.799472392  | 0.450289056 |                      |         |
| 28 | Forced expiratory volume in 1-second (FEV1), Best measure                    | class.Methanobacteria.id.119                | Outlier-corrected |                       |             |              |             |                      | 0.352   |
| 29 | Forced expiratory volume in 1-second (FEV1), Best measure                    | class.Mollicutes.id.3920                    | Raw               | 0.00794049652806537   | 0.01350537  | 0.587951069  | 0.568439257 |                      |         |
| 30 | Forced expiratory volume in 1-second (FEV1), Best measure                    | class.Mollicutes.id.3920                    | Outlier-corrected |                       |             |              |             | NA                   | 0.011   |
| 31 | Forced expiratory volume in 1-second (FEV1), Best measure                    | class.Negativicutes.id.2164                 | Raw               | -0.0163575788261091   | 0.00986185  | -1.658672431 | 0.128172369 |                      |         |
| 32 | Forced expiratory volume in 1-second (FEV1), Best measure                    | class.Negativicutes.id.2164                 | Outlier-corrected |                       |             |              |             |                      | 0.623   |
| 33 | Forced expiratory volume in 1-second (FEV1), Best measure                    | class.Verrucomicrobiae.id.4029              | Raw               | 0.011522874533035     | 0.014825865 | 0.7772143    | 0.455025139 |                      |         |
| 34 | Forced expiratory volume in 1-second (FEV1), Best measure                    | class.Verrucomicrobiae.id.4029              | Outlier-corrected | 0.00176128269708761   | 0.012849456 | 0.137070606  | 0.893992372 | rs74542928           | 0.006   |
| 35 | Forced expiratory volume in 1-second (FEV1), Best measure                    | family.Acidaminococcaceae.id.2166           | Raw               | 0.0115236382643926    | 0.026248876 | 0.439014537  | 0.676019273 |                      |         |
| 36 | Forced expiratory volume in 1-second (FEV1), Best measure                    | family.Acidaminococcaceae.id.2166           | Outlier-corrected | -0.0151265448330653   | 0.006684921 | -2.262785812 | 0.073096157 | rs45497800           | <0.001  |
| 37 | Forced expiratory volume in 1-second (FEV1), Best measure                    | family.Actinomycetaceae.id.421              | Raw               | -0.00923415914452957  | 0.008746587 | -1.055744283 | 0.350630359 |                      |         |
| 38 | Forced expiratory volume in 1-second (FEV1), Best measure                    | family.Actinomycetaceae.id.421              | Outlier-corrected |                       |             |              |             |                      | 0.65    |
| 39 | Forced expiratory volume in 1-second (FEV1), Best measure                    | family.Alcaligenaceae.id.2875               | Raw               | 0.0341213408807947    | 0.016086551 | 2.121109796  | 0.062924029 |                      |         |
| 40 | Forced expiratory volume in 1-second (FEV1), Best measure                    | family.Alcaligenaceae.id.2875               | Outlier-corrected |                       |             |              |             |                      | 0.086   |
| 41 | Forced expiratory volume in 1-second (FEV1), Best measure                    | family.Bacteroidaceae.id.917                | Raw               | -0.00834631105050873  | 0.011971152 | -0.69720197  | 0.505428829 |                      |         |
| 42 | Forced expiratory volume in 1-second (FEV1), Best measure                    | family.Bacteroidaceae.id.917                | Outlier-corrected |                       |             |              |             |                      | 0.573   |
| 43 | Forced expiratory volume in 1-second (FEV1), Best measure                    | family.BacteroidalesS24.7group.id.11173     | Raw               | 0.0224802149182772    | 0.009560266 | 2.351421529  | 0.050980725 |                      |         |
| 44 | Forced expiratory volume in 1-second (FEV1), Best measure                    | family.BacteroidalesS24.7group.id.11173     | Outlier-corrected |                       |             |              |             |                      | 0.387   |
| 45 | Forced expiratory volume in 1-second (FEV1), Best measure                    | family.Bifidobacteriaceae.id.433            | Raw               | -0.0214334629633997   | 0.01690826  | -1.267632666 | 0.236742091 |                      |         |
| 46 | Forced expiratory volume in 1-second (FEV1), Best measure                    | family.Bifidobacteriaceae.id.433            | Outlier-corrected | -0.00635273855605059  | 0.011012338 | -0.576874649 | 0.57989016  | rs4957061            | 0.046   |
| 47 | Forced expiratory volume in 1-second (FEV1), Best measure                    | family.Christensenellaceae.id.1866          | Raw               | -0.000121260823660051 | 0.011084773 | -0.010939405 | 0.991486958 |                      |         |
| 48 | Forced expiratory volume in 1-second (FEV1), Best measure                    | family.Christensenellaceae.id.1866          | Outlier-corrected |                       |             |              |             |                      | 0.328   |
| 49 | Forced expiratory volume in 1-second (FEV1), Best measure                    | family.Clostridiaceae1.id.1869              | Raw               | -0.00680936151354572  | 0.018141155 | -0.375354346 | 0.716090424 |                      |         |
| 50 | Forced expiratory volume in 1-second (FEV1), Best measure                    | family.Clostridiaceae1.id.1869              | Outlier-corrected | 0.00325069933184569   | 0.016553344 | 0.1963772    | 0.849211778 | rs12186080           | 0.004   |
| 51 | Forced expiratory volume in 1-second (FEV1), Best measure                    | family.ClostridialesvadinBB60group.id.11286 | Raw               | -0.0126288172726583   | 0.008141311 | -1.551201928 | 0.144849437 |                      |         |

|     | A                                                         | B                                           | C                 | D                    | E           | F            | G           | H                    | I      |
|-----|-----------------------------------------------------------|---------------------------------------------|-------------------|----------------------|-------------|--------------|-------------|----------------------|--------|
| 52  | Forced expiratory volume in 1-second (FEV1), Best measure | family.ClostridialesvadinBB60group.id.11286 | Outlier-corrected |                      |             |              |             |                      | 0.45   |
| 53  | Forced expiratory volume in 1-second (FEV1), Best measure | family.Coriobacteriaceae.id.811             | Raw               | 0.00417184639146536  | 0.019832982 | 0.21034892   | 0.836656411 |                      |        |
| 54  | Forced expiratory volume in 1-second (FEV1), Best measure | family.Coriobacteriaceae.id.811             | Outlier-corrected | 0.00367865886829212  | 0.017307735 | 0.212544214  | 0.835569874 | rs2442778,rs34739816 | <0.001 |
| 55  | Forced expiratory volume in 1-second (FEV1), Best measure | family.Defluviitaleaceae.id.1924            | Raw               | 0.00381590493598654  | 0.00707409  | 0.539419922  | 0.601400298 |                      |        |
| 56  | Forced expiratory volume in 1-second (FEV1), Best measure | family.Defluviitaleaceae.id.1924            | Outlier-corrected |                      |             |              |             |                      | 0.592  |
| 57  | Forced expiratory volume in 1-second (FEV1), Best measure | family.Desulfovibrionaceae.id.3169          | Raw               | 0.0314861715451894   | 0.009280832 | 3.392602147  | 0.007966174 |                      |        |
| 58  | Forced expiratory volume in 1-second (FEV1), Best measure | family.Desulfovibrionaceae.id.3169          | Outlier-corrected |                      |             |              |             |                      | 0.673  |
| 59  | Forced expiratory volume in 1-second (FEV1), Best measure | family.Enterobacteriaceae.id.3469           | Raw               | 0.00452512052323074  | 0.013198867 | 0.342841582  | 0.743409861 |                      |        |
| 60  | Forced expiratory volume in 1-second (FEV1), Best measure | family.Enterobacteriaceae.id.3469           | Outlier-corrected |                      |             |              |             |                      | 0.468  |
| 61  | Forced expiratory volume in 1-second (FEV1), Best measure | family.Erysipelotrichaceae.id.2149          | Raw               | 0.0311074758664724   | 0.011108852 | 2.800242246  | 0.016037042 |                      |        |
| 62  | Forced expiratory volume in 1-second (FEV1), Best measure | family.Erysipelotrichaceae.id.2149          | Outlier-corrected |                      |             |              |             |                      | 0.483  |
| 63  | Forced expiratory volume in 1-second (FEV1), Best measure | family.FamilyXI.id.1936                     | Raw               | -0.00534338179783782 | 0.005849344 | -0.913501105 | 0.391356559 |                      |        |
| 64  | Forced expiratory volume in 1-second (FEV1), Best measure | family.FamilyXI.id.1936                     | Outlier-corrected |                      |             |              |             |                      | 0.448  |
| 65  | Forced expiratory volume in 1-second (FEV1), Best measure | family.FamilyXIII.id.1957                   | Raw               | -0.00484500260624625 | 0.01544271  | -0.313740429 | 0.760868031 |                      |        |
| 66  | Forced expiratory volume in 1-second (FEV1), Best measure | family.FamilyXIII.id.1957                   | Outlier-corrected |                      |             |              |             |                      | 0.066  |
| 67  | Forced expiratory volume in 1-second (FEV1), Best measure | family.Lachnospiraceae.id.1987              | Raw               | -0.0233943709392904  | 0.012661303 | -1.84770643  | 0.083217539 |                      |        |
| 68  | Forced expiratory volume in 1-second (FEV1), Best measure | family.Lachnospiraceae.id.1987              | Outlier-corrected |                      |             |              |             | NA                   | 0.008  |
| 69  | Forced expiratory volume in 1-second (FEV1), Best measure | family.Lactobacillaceae.id.1836             | Raw               | -0.00639881202000273 | 0.0100787   | -0.634884646 | 0.545687492 |                      |        |
| 70  | Forced expiratory volume in 1-second (FEV1), Best measure | family.Lactobacillaceae.id.1836             | Outlier-corrected |                      |             |              |             |                      | 0.17   |
| 71  | Forced expiratory volume in 1-second (FEV1), Best measure | family.Methanobacteriaceae.id.121           | Raw               | 0.00547855384468051  | 0.006852712 | 0.799472392  | 0.450289056 |                      |        |
| 72  | Forced expiratory volume in 1-second (FEV1), Best measure | family.Methanobacteriaceae.id.121           | Outlier-corrected |                      |             |              |             |                      | 0.353  |
| 73  | Forced expiratory volume in 1-second (FEV1), Best measure | family.Oxalobacteraceae.id.2966             | Raw               | 0.00845589415299044  | 0.006756615 | 1.251498666  | 0.232804693 |                      |        |
| 74  | Forced expiratory volume in 1-second (FEV1), Best measure | family.Oxalobacteraceae.id.2966             | Outlier-corrected |                      |             |              |             |                      | 0.14   |
| 75  | Forced expiratory volume in 1-second (FEV1), Best measure | family.Pasteurellaceae.id.3689              | Raw               | 0.00992857479785471  | 0.007496115 | 1.324496147  | 0.208151966 |                      |        |
| 76  | Forced expiratory volume in 1-second (FEV1), Best measure | family.Pasteurellaceae.id.3689              | Outlier-corrected |                      |             |              |             |                      | 0.261  |
| 77  | Forced expiratory volume in 1-second (FEV1), Best measure | family.Peptococcaceae.id.2024               | Raw               | 0.0200907144045924   | 0.010149842 | 1.979411509  | 0.083124387 |                      |        |
| 78  | Forced expiratory volume in 1-second (FEV1), Best measure | family.Peptococcaceae.id.2024               | Outlier-corrected |                      |             |              |             |                      | 0.285  |
| 79  | Forced expiratory volume in 1-second (FEV1), Best measure | family.Peptostreptococcaceae.id.2042        | Raw               | -0.00300935392503141 | 0.01424122  | -0.211312926 | 0.836189247 |                      |        |
| 80  | Forced expiratory volume in 1-second (FEV1), Best measure | family.Peptostreptococcaceae.id.2042        | Outlier-corrected | 0.000267600342388419 | 0.010203941 | 0.026225196  | 0.979593686 | rs12377846,rs1467258 | 0.004  |
| 81  | Forced expiratory volume in 1-second (FEV1), Best measure | family.Porphyromonadaceae.id.943            | Raw               | 0.00951493840017929  | 0.021678519 | 0.438910906  | 0.672338747 |                      |        |
| 82  | Forced expiratory volume in 1-second (FEV1), Best measure | family.Porphyromonadaceae.id.943            | Outlier-corrected |                      |             |              |             | NA                   | 0.008  |
| 83  | Forced expiratory volume in 1-second (FEV1), Best measure | family.Prevotellaceae.id.960                | Raw               | -0.00372194017087279 | 0.008504466 | -0.437645367 | 0.668319529 |                      |        |
| 84  | Forced expiratory volume in 1-second (FEV1), Best measure | family.Prevotellaceae.id.960                | Outlier-corrected |                      |             |              |             |                      | 0.558  |
| 85  | Forced expiratory volume in 1-second (FEV1), Best measure | family.Rhodospirillaceae.id.2717            | Raw               | -0.00436756332529303 | 0.011329709 | -0.385496527 | 0.706103663 |                      |        |
| 86  | Forced expiratory volume in 1-second (FEV1), Best measure | family.Rhodospirillaceae.id.2717            | Outlier-corrected | 0.00262941704369514  | 0.009540461 | 0.275606909  | 0.787538543 | rs72714493           | 0.002  |
| 87  | Forced expiratory volume in 1-second (FEV1), Best measure | family.Rikenellaceae.id.967                 | Raw               | 0.0209450915384981   | 0.012222751 | 1.713615119  | 0.103768518 |                      |        |
| 88  | Forced expiratory volume in 1-second (FEV1), Best measure | family.Rikenellaceae.id.967                 | Outlier-corrected | 0.0143977480700672   | 0.010938097 | 1.316293639  | 0.205548074 | rs4264350            | 0.012  |
| 89  | Forced expiratory volume in 1-second (FEV1), Best measure | family.Ruminococcaceae.id.2050              | Raw               | -0.00714083060055183 | 0.016342741 | -0.436942029 | 0.672449244 |                      |        |
| 90  | Forced expiratory volume in 1-second (FEV1), Best measure | family.Ruminococcaceae.id.2050              | Outlier-corrected | -0.00698074067538312 | 0.011451418 | -0.609596189 | 0.561386569 | rs1158100,rs55793120 | 0.031  |
| 91  | Forced expiratory volume in 1-second (FEV1), Best measure | family.Streptococcaceae.id.1850             | Raw               | -0.00059301926851377 | 0.017141612 | -0.034595304 | 0.973022242 |                      |        |
| 92  | Forced expiratory volume in 1-second (FEV1), Best measure | family.Streptococcaceae.id.1850             | Outlier-corrected | 0.00795585780851107  | 0.015933696 | 0.499310249  | 0.628362303 | rs957755             | 0.006  |
| 93  | Forced expiratory volume in 1-second (FEV1), Best measure | family.Veillonellaceae.id.2172              | Raw               | 0.000696721770569869 | 0.008783338 | 0.079323115  | 0.937650846 |                      |        |
| 94  | Forced expiratory volume in 1-second (FEV1), Best measure | family.Veillonellaceae.id.2172              | Outlier-corrected |                      |             |              |             |                      | 0.172  |
| 95  | Forced expiratory volume in 1-second (FEV1), Best measure | family.Verrucomicrobiaceae.id.4036          | Raw               | 0.0115218922442683   | 0.014829462 | 0.776959535  | 0.455168749 |                      |        |
| 96  | Forced expiratory volume in 1-second (FEV1), Best measure | family.Verrucomicrobiaceae.id.4036          | Outlier-corrected | 0.00175910991273221  | 0.012852186 | 0.136872425  | 0.894144581 | rs74542928           | 0.006  |
| 97  | Forced expiratory volume in 1-second (FEV1), Best measure | family.Victivallaceae.id.2255               | Raw               | -0.00913063481985939 | 0.006978549 | -1.30838589  | 0.217420821 |                      |        |
| 98  | Forced expiratory volume in 1-second (FEV1), Best measure | family.Victivallaceae.id.2255               | Outlier-corrected |                      |             |              |             | NA                   | 0.034  |
| 99  | Forced expiratory volume in 1-second (FEV1), Best measure | genus..Clostridiuminnocuumgroup.id.14397    | Raw               | 0.000116723203113727 | 0.003310017 | 0.035263627  | 0.972733537 |                      |        |
| 100 | Forced expiratory volume in 1-second (FEV1), Best measure | genus..Clostridiuminnocuumgroup.id.14397    | Outlier-corrected |                      |             |              |             |                      | 0.981  |
| 101 | Forced expiratory volume in 1-second (FEV1), Best measure | genus..Eubacteriumbrachygroup.id.11296      | Raw               | -0.00586487318644095 | 0.008509819 | -0.689188924 | 0.508081173 |                      |        |
| 102 | Forced expiratory volume in 1-second (FEV1), Best measure | genus..Eubacteriumbrachygroup.id.11296      | Outlier-corrected | -0.0125015892531774  | 0.00711308  | -1.75754946  | 0.11688211  | rs73199919           | 0.039  |

|     | A                                                         | B                                                 | C                 | D                    | E           | F            | G           | H                               | I      |
|-----|-----------------------------------------------------------|---------------------------------------------------|-------------------|----------------------|-------------|--------------|-------------|---------------------------------|--------|
| 103 | Forced expiratory volume in 1-second (FEV1), Best measure | genus..Eubacteriumcoprostanoligenesgroup.id.11375 | Raw               | -0.0290183755346771  | 0.012986145 | -2.234564332 | 0.045237648 |                                 |        |
| 104 | Forced expiratory volume in 1-second (FEV1), Best measure | genus..Eubacteriumcoprostanoligenesgroup.id.11375 | Outlier-corrected |                      |             |              |             |                                 | 0.16   |
| 105 | Forced expiratory volume in 1-second (FEV1), Best measure | genus..Eubacteriumeligensgroup.id.14372           | Raw               | -0.0140565212294254  | 0.01307428  | -1.075127717 | 0.323638737 |                                 |        |
| 106 | Forced expiratory volume in 1-second (FEV1), Best measure | genus..Eubacteriumeligensgroup.id.14372           | Outlier-corrected |                      |             |              |             |                                 | 0.467  |
| 107 | Forced expiratory volume in 1-second (FEV1), Best measure | genus..Eubacteriumfissicatenagroup.id.14373       | Raw               | -0.0049544546441474  | 0.010563321 | -0.469024325 | 0.653309068 |                                 |        |
| 108 | Forced expiratory volume in 1-second (FEV1), Best measure | genus..Eubacteriumfissicatenagroup.id.14373       | Outlier-corrected | -0.0131317421068242  | 0.007841495 | -1.674647832 | 0.145024949 | rs7104872                       | 0.016  |
| 109 | Forced expiratory volume in 1-second (FEV1), Best measure | genus..Eubacteriumhalliigroup.id.11338            | Raw               | 0.00252694181372815  | 0.008423978 | 0.299970125  | 0.768316882 |                                 |        |
| 110 | Forced expiratory volume in 1-second (FEV1), Best measure | genus..Eubacteriumhalliigroup.id.11338            | Outlier-corrected |                      |             |              |             |                                 | 0.482  |
| 111 | Forced expiratory volume in 1-second (FEV1), Best measure | genus..Eubacteriumnodatumgroup.id.11297           | Raw               | 0.00741133072100832  | 0.006653689 | 1.113867932  | 0.291391715 |                                 |        |
| 112 | Forced expiratory volume in 1-second (FEV1), Best measure | genus..Eubacteriumnodatumgroup.id.11297           | Outlier-corrected |                      |             |              |             |                                 | 0.115  |
| 113 | Forced expiratory volume in 1-second (FEV1), Best measure | genus..Eubacteriumoxidoreducensgroup.id.11339     | Raw               | 0.00154684231862012  | 0.00787896  | 0.196325693  | 0.853926254 |                                 |        |
| 114 | Forced expiratory volume in 1-second (FEV1), Best measure | genus..Eubacteriumoxidoreducensgroup.id.11339     | Outlier-corrected |                      |             |              |             |                                 | 0.58   |
| 115 | Forced expiratory volume in 1-second (FEV1), Best measure | genus..Eubacteriumrectalegroup.id.14374           | Raw               | -0.0145630058296055  | 0.01827085  | -0.7970623   | 0.45159873  |                                 |        |
| 116 | Forced expiratory volume in 1-second (FEV1), Best measure | genus..Eubacteriumrectalegroup.id.14374           | Outlier-corrected |                      |             |              |             |                                 | 0.11   |
| 117 | Forced expiratory volume in 1-second (FEV1), Best measure | genus..Eubacteriumruminantiumgroup.id.11340       | Raw               | 0.00947096769727877  | 0.008008823 | 1.182566799  | 0.25325718  |                                 |        |
| 118 | Forced expiratory volume in 1-second (FEV1), Best measure | genus..Eubacteriumruminantiumgroup.id.11340       | Outlier-corrected | 0.00517529678636523  | 0.006696769 | 0.772805011  | 0.45090403  | rs209813                        | 0.04   |
| 119 | Forced expiratory volume in 1-second (FEV1), Best measure | genus..Eubacteriumventriosumgroup.id.11341        | Raw               | -0.0114100589839881  | 0.011562911 | -0.98678083  | 0.341760977 |                                 |        |
| 120 | Forced expiratory volume in 1-second (FEV1), Best measure | genus..Eubacteriumventriosumgroup.id.11341        | Outlier-corrected |                      |             |              |             |                                 | 0.147  |
| 121 | Forced expiratory volume in 1-second (FEV1), Best measure | genus..Eubacteriumxylanophilumgroup.id.14375      | Raw               | 0.0250187240223145   | 0.015648305 | 1.598813688  | 0.148529355 |                                 |        |
| 122 | Forced expiratory volume in 1-second (FEV1), Best measure | genus..Eubacteriumxylanophilumgroup.id.14375      | Outlier-corrected |                      |             |              |             |                                 | 0.068  |
| 123 | Forced expiratory volume in 1-second (FEV1), Best measure | genus..Ruminococcusgavureauiigroup.id.11342       | Raw               | 0.0213648766209477   | 0.017871162 | 1.195494511  | 0.257030472 |                                 |        |
| 124 | Forced expiratory volume in 1-second (FEV1), Best measure | genus..Ruminococcusgavureauiigroup.id.11342       | Outlier-corrected | 0.0303863090421698   | 0.010705795 | 2.838304654  | 0.021868932 | rs2105937,rs2166943,rs289410    | 0.001  |
| 125 | Forced expiratory volume in 1-second (FEV1), Best measure | genus..Ruminococcusnavusgroup.id.14376            | Raw               | 0.00368071477688337  | 0.01150944  | 0.319799649  | 0.755701497 |                                 |        |
| 126 | Forced expiratory volume in 1-second (FEV1), Best measure | genus..Ruminococcusnavusgroup.id.14376            | Outlier-corrected | 0.0111186570443192   | 0.009976803 | 1.114450866  | 0.293960455 | rs2909242                       | 0.003  |
| 127 | Forced expiratory volume in 1-second (FEV1), Best measure | genus..Ruminococcusstorquesgroup.id.14377         | Raw               | 0.020473915467742    | 0.016656219 | 1.229205502  | 0.253920248 |                                 |        |
| 128 | Forced expiratory volume in 1-second (FEV1), Best measure | genus..Ruminococcusstorquesgroup.id.14377         | Outlier-corrected |                      |             |              |             |                                 | 0.065  |
| 129 | Forced expiratory volume in 1-second (FEV1), Best measure | genus.Actinomyces.id.423                          | Raw               | -0.0149926111422466  | 0.013194455 | -1.136281193 | 0.299177031 |                                 |        |
| 130 | Forced expiratory volume in 1-second (FEV1), Best measure | genus.Actinomyces.id.423                          | Outlier-corrected |                      |             |              |             |                                 | 0.072  |
| 131 | Forced expiratory volume in 1-second (FEV1), Best measure | genus.Adlercreutzia.id.812                        | Raw               | 0.00990443153202438  | 0.016227474 | 0.610349561  | 0.560915021 |                                 |        |
| 132 | Forced expiratory volume in 1-second (FEV1), Best measure | genus.Adlercreutzia.id.812                        | Outlier-corrected | 0.00568203320110352  | 0.007781126 | 0.730232749  | 0.498010832 | rs7680684,rs9490822             | 0.011  |
| 133 | Forced expiratory volume in 1-second (FEV1), Best measure | genus.Akkermansia.id.4037                         | Raw               | 0.0115378351794582   | 0.014819181 | 0.778574405  | 0.454258947 |                                 |        |
| 134 | Forced expiratory volume in 1-second (FEV1), Best measure | genus.Akkermansia.id.4037                         | Outlier-corrected | 0.00174195524608719  | 0.012850573 | 0.135554675  | 0.89515677  | rs74542928                      | 0.001  |
| 135 | Forced expiratory volume in 1-second (FEV1), Best measure | genus.Alistipes.id.968                            | Raw               | 0.0239237481550568   | 0.016846931 | 1.420065622  | 0.179124224 |                                 |        |
| 136 | Forced expiratory volume in 1-second (FEV1), Best measure | genus.Alistipes.id.968                            | Outlier-corrected | 0.0142408486152414   | 0.015167693 | 0.938893499  | 0.366299954 | rs12990744                      | 0.004  |
| 137 | Forced expiratory volume in 1-second (FEV1), Best measure | genus.Allisonella.id.2174                         | Raw               | -0.00096531315996028 | 0.005255545 | -0.18367516  | 0.859475552 |                                 |        |
| 138 | Forced expiratory volume in 1-second (FEV1), Best measure | genus.Allisonella.id.2174                         | Outlier-corrected |                      |             |              |             |                                 | 0.583  |
| 139 | Forced expiratory volume in 1-second (FEV1), Best measure | genus.Alloprevotella.id.961                       | Raw               | -0.00312494044853936 | 0.009697085 | -0.322255655 | 0.760297143 |                                 |        |
| 140 | Forced expiratory volume in 1-second (FEV1), Best measure | genus.Alloprevotella.id.961                       | Outlier-corrected |                      |             |              |             |                                 | 0.109  |
| 141 | Forced expiratory volume in 1-second (FEV1), Best measure | genus.Anaerofilum.id.2053                         | Raw               | 0.00279084468105506  | 0.009191832 | 0.303622235  | 0.767638862 |                                 |        |
| 142 | Forced expiratory volume in 1-second (FEV1), Best measure | genus.Anaerofilum.id.2053                         | Outlier-corrected | 0.010272201904738    | 0.006633375 | 1.548563387  | 0.155894639 | rs79598899                      | 0.021  |
| 143 | Forced expiratory volume in 1-second (FEV1), Best measure | genus.Anaerostipes.id.1991                        | Raw               | 0.0207085385903952   | 0.016060392 | 1.289416755  | 0.223705872 |                                 |        |
| 144 | Forced expiratory volume in 1-second (FEV1), Best measure | genus.Anaerostipes.id.1991                        | Outlier-corrected |                      |             |              |             | NA                              | 0.018  |
| 145 | Forced expiratory volume in 1-second (FEV1), Best measure | genus.Anaerotruncus.id.2054                       | Raw               | 0.0234601454131238   | 0.017481928 | 1.341965565  | 0.204447755 |                                 |        |
| 146 | Forced expiratory volume in 1-second (FEV1), Best measure | genus.Anaerotruncus.id.2054                       | Outlier-corrected | 0.0354886471884972   | 0.010849064 | 3.271125317  | 0.009665324 | rs10150232,rs11018566,rs7155595 | <0.001 |
| 147 | Forced expiratory volume in 1-second (FEV1), Best measure | genus.Bacteroides.id.918                          | Raw               | -0.00834631105050873 | 0.011971152 | -0.69720197  | 0.505428829 |                                 |        |
| 148 | Forced expiratory volume in 1-second (FEV1), Best measure | genus.Bacteroides.id.918                          | Outlier-corrected |                      |             |              |             |                                 | 0.589  |
| 149 | Forced expiratory volume in 1-second (FEV1), Best measure | genus.Barnesiella.id.944                          | Raw               | -0.0107346792801447  | 0.013038363 | -0.82331494  | 0.425175267 |                                 |        |
| 150 | Forced expiratory volume in 1-second (FEV1), Best measure | genus.Barnesiella.id.944                          | Outlier-corrected | -0.0182027323327153  | 0.011179969 | -1.628155864 | 0.129444824 | rs13242616                      | 0.013  |
| 151 | Forced expiratory volume in 1-second (FEV1), Best measure | genus.Bifidobacterium.id.436                      | Raw               | -0.0083692419360155  | 0.021572311 | -0.387962236 | 0.706174424 |                                 |        |
| 152 | Forced expiratory volume in 1-second (FEV1), Best measure | genus.Bifidobacterium.id.436                      | Outlier-corrected | -0.0134509175912187  | 0.010006639 | -1.344199359 | 0.220813897 | rs56108664,rs5746486,rs62181700 | <0.001 |
| 153 | Forced expiratory volume in 1-second (FEV1), Best measure | genus.Bilophila.id.3170                           | Raw               | -0.00244087167312002 | 0.014780061 | -0.165146251 | 0.871824741 |                                 |        |

|     | A                                                         | B                                          | C                 | D                     | E           | F            | G           | H                                | I      |
|-----|-----------------------------------------------------------|--------------------------------------------|-------------------|-----------------------|-------------|--------------|-------------|----------------------------------|--------|
| 154 | Forced expiratory volume in 1-second (FEV1), Best measure | genus.Bilophila.id.3170                    | Outlier-corrected | -0.0124647229296774   | 0.01192667  | -1.045113416 | 0.320575704 | rs3827020                        | 0.006  |
| 155 | Forced expiratory volume in 1-second (FEV1), Best measure | genus.Blautia.id.1992                      | Raw               | -0.011973262443298    | 0.010505042 | -1.139763417 | 0.278595398 |                                  |        |
| 156 | Forced expiratory volume in 1-second (FEV1), Best measure | genus.Blautia.id.1992                      | Outlier-corrected |                       |             |              |             |                                  | 0.482  |
| 157 | Forced expiratory volume in 1-second (FEV1), Best measure | genus.Butyricicoccus.id.2055               | Raw               | 0.0103704488577844    | 0.021680612 | 0.478328232  | 0.646994588 |                                  |        |
| 158 | Forced expiratory volume in 1-second (FEV1), Best measure | genus.Butyricicoccus.id.2055               | Outlier-corrected | 0.0312132609559764    | 0.010114788 | 3.085903671  | 0.027286031 | rs10084203,rs12034718            | 0.001  |
| 159 | Forced expiratory volume in 1-second (FEV1), Best measure | genus.Butyricimonas.id.945                 | Raw               | -0.016406701412206    | 0.017431229 | -0.941224605 | 0.366800808 |                                  |        |
| 160 | Forced expiratory volume in 1-second (FEV1), Best measure | genus.Butyricimonas.id.945                 | Outlier-corrected | -0.00504164244208605  | 0.013256879 | -0.380303887 | 0.713618484 | rs12304031,rs62130338,rs9657374  | <0.001 |
| 161 | Forced expiratory volume in 1-second (FEV1), Best measure | genus.Butyrivibrio.id.1993                 | Raw               | 0.00463727990390844   | 0.007018115 | 0.660758646  | 0.519492706 |                                  |        |
| 162 | Forced expiratory volume in 1-second (FEV1), Best measure | genus.Butyrivibrio.id.1993                 | Outlier-corrected | -6.65642576561612e-05 | 0.004642437 | -0.014338214 | 0.988816905 | rs11761679,rs16934069,rs17163238 | 0.002  |
| 163 | Forced expiratory volume in 1-second (FEV1), Best measure | genus.CandidatusSoleaferrea.id.11350       | Raw               | 0.000603045822140961  | 0.009966395 | 0.060507916  | 0.953235397 |                                  |        |
| 164 | Forced expiratory volume in 1-second (FEV1), Best measure | genus.CandidatusSoleaferrea.id.11350       | Outlier-corrected |                       |             |              |             |                                  | 0.134  |
| 165 | Forced expiratory volume in 1-second (FEV1), Best measure | genus.Catenibacterium.id.2153              | Raw               | 0.000673806797281574  | 0.010211269 | 0.065986586  | 0.950554903 |                                  |        |
| 166 | Forced expiratory volume in 1-second (FEV1), Best measure | genus.Catenibacterium.id.2153              | Outlier-corrected |                       |             |              |             |                                  | 0.172  |
| 167 | Forced expiratory volume in 1-second (FEV1), Best measure | genus.ChristensenellaceaeR.7group.id.11283 | Raw               | 0.0174810828537263    | 0.017724268 | 0.986279526  | 0.349767133 |                                  |        |
| 168 | Forced expiratory volume in 1-second (FEV1), Best measure | genus.ChristensenellaceaeR.7group.id.11283 | Outlier-corrected |                       |             |              |             | NA                               | 0.035  |
| 169 | Forced expiratory volume in 1-second (FEV1), Best measure | genus.Clostridiumsensustricto1.id.1873     | Raw               | 0.0144722498536342    | 0.016023065 | 0.903213599  | 0.4012184   |                                  |        |
| 170 | Forced expiratory volume in 1-second (FEV1), Best measure | genus.Clostridiumsensustricto1.id.1873     | Outlier-corrected |                       |             |              |             |                                  | 0.088  |
| 171 | Forced expiratory volume in 1-second (FEV1), Best measure | genus.Collinsella.id.815                   | Raw               | -0.00342198848579529  | 0.00774596  | -0.441777177 | 0.670348457 |                                  |        |
| 172 | Forced expiratory volume in 1-second (FEV1), Best measure | genus.Collinsella.id.815                   | Outlier-corrected |                       |             |              |             |                                  | 0.917  |
| 173 | Forced expiratory volume in 1-second (FEV1), Best measure | genus.Coprobacter.id.949                   | Raw               | -0.0150777778564975   | 0.009933764 | -1.517831341 | 0.160016583 |                                  |        |
| 174 | Forced expiratory volume in 1-second (FEV1), Best measure | genus.Coprobacter.id.949                   | Outlier-corrected | -0.00752304081143194  | 0.006336013 | -1.187346243 | 0.265482801 | rs12996055                       | 0.032  |
| 175 | Forced expiratory volume in 1-second (FEV1), Best measure | genus.Coproccoccus1.id.11301               | Raw               | 0.00800809345283448   | 0.011535837 | 0.694192663  | 0.501959216 |                                  |        |
| 176 | Forced expiratory volume in 1-second (FEV1), Best measure | genus.Coproccoccus1.id.11301               | Outlier-corrected |                       |             |              |             |                                  | 0.167  |
| 177 | Forced expiratory volume in 1-second (FEV1), Best measure | genus.Coproccoccus2.id.11302               | Raw               | -0.00914522435734971  | 0.015864389 | -0.57646243  | 0.58235594  |                                  |        |
| 178 | Forced expiratory volume in 1-second (FEV1), Best measure | genus.Coproccoccus2.id.11302               | Outlier-corrected |                       |             |              |             |                                  | 0.074  |
| 179 | Forced expiratory volume in 1-second (FEV1), Best measure | genus.Coproccoccus3.id.11303               | Raw               | -0.00554082651885581  | 0.010185543 | -0.543989313 | 0.601276333 |                                  |        |
| 180 | Forced expiratory volume in 1-second (FEV1), Best measure | genus.Coproccoccus3.id.11303               | Outlier-corrected |                       |             |              |             |                                  | 0.703  |
| 181 | Forced expiratory volume in 1-second (FEV1), Best measure | genus.DefluviitaleaceaeUCG011.id.11287     | Raw               | 0.00751772644355464   | 0.009577559 | 0.784931395  | 0.455107718 |                                  |        |
| 182 | Forced expiratory volume in 1-second (FEV1), Best measure | genus.DefluviitaleaceaeUCG011.id.11287     | Outlier-corrected |                       |             |              |             |                                  | 0.274  |
| 183 | Forced expiratory volume in 1-second (FEV1), Best measure | genus.Desulfovibrio.id.3173                | Raw               | 0.00829821959100958   | 0.013509802 | 0.614236945  | 0.554266325 |                                  |        |
| 184 | Forced expiratory volume in 1-second (FEV1), Best measure | genus.Desulfovibrio.id.3173                | Outlier-corrected |                       |             |              |             | NA                               | 0.025  |
| 185 | Forced expiratory volume in 1-second (FEV1), Best measure | genus.Dialister.id.2183                    | Raw               | 0.0130971541708768    | 0.014390108 | 0.910149802  | 0.386469673 |                                  |        |
| 186 | Forced expiratory volume in 1-second (FEV1), Best measure | genus.Dialister.id.2183                    | Outlier-corrected |                       |             |              |             |                                  | 0.058  |
| 187 | Forced expiratory volume in 1-second (FEV1), Best measure | genus.Dorea.id.1997                        | Raw               | 0.0106307954775979    | 0.015211648 | 0.698858884  | 0.502298704 |                                  |        |
| 188 | Forced expiratory volume in 1-second (FEV1), Best measure | genus.Dorea.id.1997                        | Outlier-corrected |                       |             |              |             |                                  | 0.124  |
| 189 | Forced expiratory volume in 1-second (FEV1), Best measure | genus.Eggerthella.id.819                   | Raw               | -0.00141181090653576  | 0.011859795 | -0.119041759 | 0.907599724 |                                  |        |
| 190 | Forced expiratory volume in 1-second (FEV1), Best measure | genus.Eggerthella.id.819                   | Outlier-corrected | 0.00357246226199425   | 0.009258355 | 0.385863617  | 0.711056753 | rs112205261,rs3851328,rs6430926  | <0.001 |
| 191 | Forced expiratory volume in 1-second (FEV1), Best measure | genus.Eisenbergiella.id.11304              | Raw               | 0.00561871111110627   | 0.007494999 | 0.749661352  | 0.470727065 |                                  |        |
| 192 | Forced expiratory volume in 1-second (FEV1), Best measure | genus.Eisenbergiella.id.11304              | Outlier-corrected |                       |             |              |             |                                  | 0.362  |
| 193 | Forced expiratory volume in 1-second (FEV1), Best measure | genus.Enterorhabdus.id.820                 | Raw               | 0.00582197767372661   | 0.011240963 | 0.517925159  | 0.626603535 |                                  |        |
| 194 | Forced expiratory volume in 1-second (FEV1), Best measure | genus.Enterorhabdus.id.820                 | Outlier-corrected |                       |             |              |             |                                  | 0.278  |
| 195 | Forced expiratory volume in 1-second (FEV1), Best measure | genus.Erysipelatoclostridium.id.11381      | Raw               | 0.0112678923852312    | 0.005807394 | 1.94026651   | 0.072761026 |                                  |        |
| 196 | Forced expiratory volume in 1-second (FEV1), Best measure | genus.Erysipelatoclostridium.id.11381      | Outlier-corrected |                       |             |              |             |                                  | 0.845  |
| 197 | Forced expiratory volume in 1-second (FEV1), Best measure | genus.ErysipelotrichaceaeUCG003.id.11384   | Raw               | -0.00674113593131602  | 0.008099325 | -0.83230837  | 0.418289452 |                                  |        |
| 198 | Forced expiratory volume in 1-second (FEV1), Best measure | genus.ErysipelotrichaceaeUCG003.id.11384   | Outlier-corrected |                       |             |              |             |                                  | 0.554  |
| 199 | Forced expiratory volume in 1-second (FEV1), Best measure | genus.Escherichia.Shigella.id.3504         | Raw               | 0.0197388793663922    | 0.008554415 | 2.30744946   | 0.046429913 |                                  |        |
| 200 | Forced expiratory volume in 1-second (FEV1), Best measure | genus.Escherichia.Shigella.id.3504         | Outlier-corrected |                       |             |              |             |                                  | 0.706  |
| 201 | Forced expiratory volume in 1-second (FEV1), Best measure | genus.Faecalibacterium.id.2057             | Raw               | -0.0217077640889254   | 0.015030459 | -1.444251541 | 0.186665873 |                                  |        |
| 202 | Forced expiratory volume in 1-second (FEV1), Best measure | genus.Faecalibacterium.id.2057             | Outlier-corrected |                       |             |              |             |                                  | 0.069  |
| 203 | Forced expiratory volume in 1-second (FEV1), Best measure | genus.FamilyXIIID3011group.id.11293        | Raw               | 0.00466788788392014   | 0.01076707  | 0.433533724  | 0.673830049 |                                  |        |
| 204 | Forced expiratory volume in 1-second (FEV1), Best measure | genus.FamilyXIIID3011group.id.11293        | Outlier-corrected |                       |             |              |             |                                  | 0.436  |

|     | A                                                         | B                                          | C                 | D                    | E           | F            | G           | H                     | I      |
|-----|-----------------------------------------------------------|--------------------------------------------|-------------------|----------------------|-------------|--------------|-------------|-----------------------|--------|
| 205 | Forced expiratory volume in 1-second (FEV1), Best measure | genus.FamilyXIIIUCG001.id.11294            | Raw               | -0.0130589766992307  | 0.01342958  | -0.97240397  | 0.363244362 |                       |        |
| 206 | Forced expiratory volume in 1-second (FEV1), Best measure | genus.FamilyXIIIUCG001.id.11294            | Outlier-corrected |                      |             |              |             |                       | 0.195  |
| 207 | Forced expiratory volume in 1-second (FEV1), Best measure | genus.Flavonifactor.id.2059                | Raw               | 0.000310803936817494 | 0.031897253 | 0.009743909  | 0.992692213 |                       |        |
| 208 | Forced expiratory volume in 1-second (FEV1), Best measure | genus.Flavonifactor.id.2059                | Outlier-corrected | -0.00283374892212116 | 0.010999512 | -0.257624977 | 0.82078108  | rs12030302,rs806808   | 0.002  |
| 209 | Forced expiratory volume in 1-second (FEV1), Best measure | genus.Fusicatenibacter.id.11305            | Raw               | 0.0116466090917129   | 0.013934761 | 0.83579537   | 0.414863385 |                       |        |
| 210 | Forced expiratory volume in 1-second (FEV1), Best measure | genus.Fusicatenibacter.id.11305            | Outlier-corrected | 0.00235139541879768  | 0.010673407 | 0.220304116  | 0.828420726 | rs73103914            | 0.002  |
| 211 | Forced expiratory volume in 1-second (FEV1), Best measure | genus.Gordonibacter.id.821                 | Raw               | -0.0104574563884411  | 0.00537143  | -1.94686631  | 0.080163701 |                       |        |
| 212 | Forced expiratory volume in 1-second (FEV1), Best measure | genus.Gordonibacter.id.821                 | Outlier-corrected |                      |             |              |             |                       | 0.565  |
| 213 | Forced expiratory volume in 1-second (FEV1), Best measure | genus.Haemophilus.id.3698                  | Raw               | -0.00332030327576942 | 0.009535452 | -0.348206183 | 0.73667072  |                       |        |
| 214 | Forced expiratory volume in 1-second (FEV1), Best measure | genus.Haemophilus.id.3698                  | Outlier-corrected |                      |             |              |             |                       | 0.18   |
| 215 | Forced expiratory volume in 1-second (FEV1), Best measure | genus.Holdemanella.id.11393                | Raw               | -0.00578869667008454 | 0.008680028 | -0.666898357 | 0.519927477 |                       |        |
| 216 | Forced expiratory volume in 1-second (FEV1), Best measure | genus.Holdemanella.id.11393                | Outlier-corrected |                      |             |              |             |                       | 0.168  |
| 217 | Forced expiratory volume in 1-second (FEV1), Best measure | genus.Holdemania.id.2157                   | Raw               | 0.00631048358047091  | 0.012481065 | 0.505604588  | 0.621597913 |                       |        |
| 218 | Forced expiratory volume in 1-second (FEV1), Best measure | genus.Holdemania.id.2157                   | Outlier-corrected | 0.0139833589344366   | 0.01041417  | 1.342724251  | 0.204208951 | rs111745969           | <0.001 |
| 219 | Forced expiratory volume in 1-second (FEV1), Best measure | genus.Howardella.id.2000                   | Raw               | -0.00487460953441824 | 0.009879208 | -0.493421109 | 0.633531215 |                       |        |
| 220 | Forced expiratory volume in 1-second (FEV1), Best measure | genus.Howardella.id.2000                   | Outlier-corrected | 0.0013239453328495   | 0.008663773 | 0.15281395   | 0.882328989 | rs36081916            | 0.001  |
| 221 | Forced expiratory volume in 1-second (FEV1), Best measure | genus.Hungatella.id.11306                  | Raw               | 0.00872495556848426  | 0.007862316 | 1.109718235  | 0.32933845  |                       |        |
| 222 | Forced expiratory volume in 1-second (FEV1), Best measure | genus.Hungatella.id.11306                  | Outlier-corrected |                      |             |              |             |                       | 0.526  |
| 223 | Forced expiratory volume in 1-second (FEV1), Best measure | genus.Intestinibacter.id.11345             | Raw               | 0.00872094186065888  | 0.009311425 | 0.936585117  | 0.366046036 |                       |        |
| 224 | Forced expiratory volume in 1-second (FEV1), Best measure | genus.Intestinibacter.id.11345             | Outlier-corrected |                      |             |              |             |                       | 0.314  |
| 225 | Forced expiratory volume in 1-second (FEV1), Best measure | genus.Intestinimonas.id.2062               | Raw               | -0.00221977000745348 | 0.009654327 | -0.229924886 | 0.821256161 |                       |        |
| 226 | Forced expiratory volume in 1-second (FEV1), Best measure | genus.Intestinimonas.id.2062               | Outlier-corrected | -0.0104809467257428  | 0.008708247 | -1.203565622 | 0.248714536 | rs4113676             | 0.04   |
| 227 | Forced expiratory volume in 1-second (FEV1), Best measure | genus.Lachnodostridium.id.11308            | Raw               | -0.00901633137733829 | 0.017867482 | -0.504622397 | 0.622962258 |                       |        |
| 228 | Forced expiratory volume in 1-second (FEV1), Best measure | genus.Lachnodostridium.id.11308            | Outlier-corrected | -0.00991463601405194 | 0.011681493 | -0.848747324 | 0.415876752 | rs12566975,rs72829893 | 0.005  |
| 229 | Forced expiratory volume in 1-second (FEV1), Best measure | genus.Lachnospira.id.2004                  | Raw               | 0.0176559555859951   | 0.024457152 | 0.721913801  | 0.502686359 |                       |        |
| 230 | Forced expiratory volume in 1-second (FEV1), Best measure | genus.Lachnospira.id.2004                  | Outlier-corrected |                      |             |              |             |                       | 0.068  |
| 231 | Forced expiratory volume in 1-second (FEV1), Best measure | genus.LachnospiraceaeFCS020group.id.11314  | Raw               | 0.00514887075678018  | 0.0103686   | 0.496583014  | 0.629257327 |                       |        |
| 232 | Forced expiratory volume in 1-second (FEV1), Best measure | genus.LachnospiraceaeFCS020group.id.11314  | Outlier-corrected |                      |             |              |             |                       | 0.216  |
| 233 | Forced expiratory volume in 1-second (FEV1), Best measure | genus.LachnospiraceaeNC2004group.id.11316  | Raw               | 0.0102450622889518   | 0.009473312 | 1.081465676  | 0.311009001 |                       |        |
| 234 | Forced expiratory volume in 1-second (FEV1), Best measure | genus.LachnospiraceaeNC2004group.id.11316  | Outlier-corrected |                      |             |              |             |                       | 0.179  |
| 235 | Forced expiratory volume in 1-second (FEV1), Best measure | genus.LachnospiraceaeND3007group.id.11317  | dat<4SNP          | dat<4SNP             |             |              |             |                       |        |
| 236 | Forced expiratory volume in 1-second (FEV1), Best measure | genus.LachnospiraceaeND3007group.id.11317  |                   |                      |             |              |             |                       |        |
| 237 | Forced expiratory volume in 1-second (FEV1), Best measure | genus.LachnospiraceaeNK4A136group.id.11319 | Raw               | 0.0139740117551623   | 0.007170017 | 1.948950869  | 0.075064865 |                       |        |
| 238 | Forced expiratory volume in 1-second (FEV1), Best measure | genus.LachnospiraceaeNK4A136group.id.11319 | Outlier-corrected |                      |             |              |             |                       | 0.84   |
| 239 | Forced expiratory volume in 1-second (FEV1), Best measure | genus.LachnospiraceaeUCG001.id.11321       | Raw               | -0.00598678457625827 | 0.00976386  | -0.613157552 | 0.551216913 |                       |        |
| 240 | Forced expiratory volume in 1-second (FEV1), Best measure | genus.LachnospiraceaeUCG001.id.11321       | Outlier-corrected |                      |             |              |             |                       | 0.147  |
| 241 | Forced expiratory volume in 1-second (FEV1), Best measure | genus.LachnospiraceaeUCG004.id.11324       | Raw               | -0.0025702475672027  | 0.019861626 | -0.12940771  | 0.899600932 |                       |        |
| 242 | Forced expiratory volume in 1-second (FEV1), Best measure | genus.LachnospiraceaeUCG004.id.11324       | Outlier-corrected | -0.0279822386360708  | 0.010887469 | -2.570132643 | 0.03312073  | rs11128180,rs2726805  | <0.001 |
| 243 | Forced expiratory volume in 1-second (FEV1), Best measure | genus.LachnospiraceaeUCG008.id.11328       | Raw               | 0.0091596297842389   | 0.007086765 | 1.292498073  | 0.228380247 |                       |        |
| 244 | Forced expiratory volume in 1-second (FEV1), Best measure | genus.LachnospiraceaeUCG008.id.11328       | Outlier-corrected |                      |             |              |             |                       | 0.577  |
| 245 | Forced expiratory volume in 1-second (FEV1), Best measure | genus.LachnospiraceaeUCG010.id.11330       | Raw               | 0.00502136923283576  | 0.010918633 | 0.459889914  | 0.656503123 |                       |        |
| 246 | Forced expiratory volume in 1-second (FEV1), Best measure | genus.LachnospiraceaeUCG010.id.11330       | Outlier-corrected |                      |             |              |             |                       | 0.281  |
| 247 | Forced expiratory volume in 1-second (FEV1), Best measure | genus.Lactobacillus.id.1837                | Raw               | -0.0119860256654921  | 0.009206561 | -1.301900353 | 0.240695555 |                       |        |
| 248 | Forced expiratory volume in 1-second (FEV1), Best measure | genus.Lactobacillus.id.1837                | Outlier-corrected |                      |             |              |             |                       | 0.342  |
| 249 | Forced expiratory volume in 1-second (FEV1), Best measure | genus.Lactococcus.id.1851                  | Raw               | -0.0113336707801824  | 0.006196372 | -1.829081758 | 0.104784418 |                       |        |
| 250 | Forced expiratory volume in 1-second (FEV1), Best measure | genus.Lactococcus.id.1851                  | Outlier-corrected |                      |             |              |             |                       | 0.522  |
| 251 | Forced expiratory volume in 1-second (FEV1), Best measure | genus.Marvinbryantia.id.2005               | Raw               | 0.0272643660509576   | 0.014539166 | 1.875235905  | 0.093514464 |                       |        |
| 252 | Forced expiratory volume in 1-second (FEV1), Best measure | genus.Marvinbryantia.id.2005               | Outlier-corrected | 0.0386743341511562   | 0.009314052 | 4.152256647  | 0.003199042 | rs72948274            | 0.044  |
| 253 | Forced expiratory volume in 1-second (FEV1), Best measure | genus.Methanobrevibacter.id.123            | Raw               | -0.00650091073957288 | 0.011297585 | -0.575424804 | 0.595825124 |                       |        |
| 254 | Forced expiratory volume in 1-second (FEV1), Best measure | genus.Methanobrevibacter.id.123            | Outlier-corrected |                      |             |              |             |                       | 0.125  |
| 255 | Forced expiratory volume in 1-second (FEV1), Best measure | genus.Odoribacter.id.952                   | Raw               | -0.00729543673918537 | 0.020683247 | -0.352722016 | 0.73635704  |                       |        |

|     | A                                                         | B                                          | C                 | D                     | E           | F            | G           | H          | I      |
|-----|-----------------------------------------------------------|--------------------------------------------|-------------------|-----------------------|-------------|--------------|-------------|------------|--------|
| 256 | Forced expiratory volume in 1-second (FEV1), Best measure | genus.Odoribacter.id.952                   | Outlier-corrected |                       |             |              |             |            | 0.05   |
| 257 | Forced expiratory volume in 1-second (FEV1), Best measure | genus.Olsenella.id.822                     | Raw               | -0.00342290711502141  | 0.009204252 | -0.371883258 | 0.71773884  |            |        |
| 258 | Forced expiratory volume in 1-second (FEV1), Best measure | genus.Olsenella.id.822                     | Outlier-corrected | 0.00526302211193655   | 0.004025386 | 1.307457727  | 0.223469343 | rs62112538 | 0.005  |
| 259 | Forced expiratory volume in 1-second (FEV1), Best measure | genus.Oscillibacter.id.2063                | Raw               | -0.0079926284352145   | 0.008405889 | -0.950836755 | 0.364102047 |            |        |
| 260 | Forced expiratory volume in 1-second (FEV1), Best measure | genus.Oscillibacter.id.2063                | Outlier-corrected |                       |             |              |             |            | 0.379  |
| 261 | Forced expiratory volume in 1-second (FEV1), Best measure | genus.Oscillospira.id.2064                 | Raw               | -0.0145467509091919   | 0.014484879 | -1.004271498 | 0.348692839 |            |        |
| 262 | Forced expiratory volume in 1-second (FEV1), Best measure | genus.Oscillospira.id.2064                 | Outlier-corrected |                       |             |              |             |            | 0.069  |
| 263 | Forced expiratory volume in 1-second (FEV1), Best measure | genus.Oxalobacter.id.2978                  | Raw               | -0.000812591065747575 | 0.007351135 | -0.110539533 | 0.914168529 |            |        |
| 264 | Forced expiratory volume in 1-second (FEV1), Best measure | genus.Oxalobacter.id.2978                  | Outlier-corrected |                       |             |              |             |            | 0.119  |
| 265 | Forced expiratory volume in 1-second (FEV1), Best measure | genus.Parabacteroides.id.954               | Raw               | 0.00646297013774728   | 0.01603133  | 0.403146218  | 0.703501439 |            |        |
| 266 | Forced expiratory volume in 1-second (FEV1), Best measure | genus.Parabacteroides.id.954               | Outlier-corrected |                       |             |              |             |            | 0.297  |
| 267 | Forced expiratory volume in 1-second (FEV1), Best measure | genus.Paraprevotella.id.962                | Raw               | -0.000501231028440439 | 0.008346343 | -0.060053969 | 0.953189828 |            |        |
| 268 | Forced expiratory volume in 1-second (FEV1), Best measure | genus.Paraprevotella.id.962                | Outlier-corrected |                       |             |              |             |            | 0.153  |
| 269 | Forced expiratory volume in 1-second (FEV1), Best measure | genus.Parasutterella.id.2892               | Raw               | 0.00220709285707101   | 0.011045062 | 0.199826208  | 0.844708378 |            |        |
| 270 | Forced expiratory volume in 1-second (FEV1), Best measure | genus.Parasutterella.id.2892               | Outlier-corrected |                       |             |              |             |            | 0.051  |
| 271 | Forced expiratory volume in 1-second (FEV1), Best measure | genus.Peptococcus.id.2037                  | Raw               | 0.00718635258074633   | 0.008354141 | 0.860214375  | 0.408028525 |            |        |
| 272 | Forced expiratory volume in 1-second (FEV1), Best measure | genus.Peptococcus.id.2037                  | Outlier-corrected |                       |             |              |             |            | 0.077  |
| 273 | Forced expiratory volume in 1-second (FEV1), Best measure | genus.Phascolarctobacterium.id.2168        | Raw               | 0.00314564173665178   | 0.00901087  | 0.349094101  | 0.735047005 |            |        |
| 274 | Forced expiratory volume in 1-second (FEV1), Best measure | genus.Phascolarctobacterium.id.2168        | Outlier-corrected |                       |             |              |             |            | 0.566  |
| 275 | Forced expiratory volume in 1-second (FEV1), Best measure | genus.Prevotella7.id.11182                 | Raw               | -0.000662817179462614 | 0.010047677 | -0.065967204 | 0.948704138 |            |        |
| 276 | Forced expiratory volume in 1-second (FEV1), Best measure | genus.Prevotella7.id.11182                 | Outlier-corrected | 0.00657281592409329   | 0.007598816 | 0.864978963  | 0.409513325 | rs2240542  | <0.001 |
| 277 | Forced expiratory volume in 1-second (FEV1), Best measure | genus.Prevotella9.id.11183                 | Raw               | 0.00193706709540742   | 0.011786012 | 0.164353058  | 0.871981124 |            |        |
| 278 | Forced expiratory volume in 1-second (FEV1), Best measure | genus.Prevotella9.id.11183                 | Outlier-corrected | -0.00470557156365307  | 0.010026298 | -0.469322948 | 0.647251368 | rs7237249  | 0.008  |
| 279 | Forced expiratory volume in 1-second (FEV1), Best measure | genus.RikenellaceaeRC9gutgroup.id.11191    | Raw               | 1.26098580344977e-05  | 0.006934249 | 0.001818489  | 0.998584822 |            |        |
| 280 | Forced expiratory volume in 1-second (FEV1), Best measure | genus.RikenellaceaeRC9gutgroup.id.11191    | Outlier-corrected |                       |             |              |             |            | 0.086  |
| 281 | Forced expiratory volume in 1-second (FEV1), Best measure | genus.Romboutsia.id.11347                  | Raw               | -0.000409707361256519 | 0.00803392  | -0.050997194 | 0.960166814 |            |        |
| 282 | Forced expiratory volume in 1-second (FEV1), Best measure | genus.Romboutsia.id.11347                  | Outlier-corrected |                       |             |              |             |            | 0.648  |
| 283 | Forced expiratory volume in 1-second (FEV1), Best measure | genus.Roseburia.id.2012                    | Raw               | -0.0144957554546957   | 0.015824365 | -0.916040287 | 0.377687206 |            |        |
| 284 | Forced expiratory volume in 1-second (FEV1), Best measure | genus.Roseburia.id.2012                    | Outlier-corrected | -0.00402286800466844  | 0.012032112 | -0.334344288 | 0.744407663 | rs6445851  | 0.005  |
| 285 | Forced expiratory volume in 1-second (FEV1), Best measure | genus.Ruminiclostridium5.id.11355          | Raw               | -0.0201299368674819   | 0.012776008 | -1.575604537 | 0.14957043  |            |        |
| 286 | Forced expiratory volume in 1-second (FEV1), Best measure | genus.Ruminiclostridium5.id.11355          | Outlier-corrected |                       |             |              |             |            | 0.487  |
| 287 | Forced expiratory volume in 1-second (FEV1), Best measure | genus.Ruminiclostridium6.id.11356          | Raw               | -0.00788592477303774  | 0.009078542 | -0.868633375 | 0.399694017 |            |        |
| 288 | Forced expiratory volume in 1-second (FEV1), Best measure | genus.Ruminiclostridium6.id.11356          | Outlier-corrected |                       |             |              |             |            | 0.227  |
| 289 | Forced expiratory volume in 1-second (FEV1), Best measure | genus.Ruminiclostridium9.id.11357          | Raw               | 0.00499355954241216   | 0.017916415 | 0.278714219  | 0.787533065 |            |        |
| 290 | Forced expiratory volume in 1-second (FEV1), Best measure | genus.Ruminiclostridium9.id.11357          | Outlier-corrected |                       |             |              |             |            | 0.059  |
| 291 | Forced expiratory volume in 1-second (FEV1), Best measure | genus.RuminococcaceaeNK4A214group.id.11358 | Raw               | 0.00664233546373276   | 0.014728564 | 0.450983251  | 0.660042643 |            |        |
| 292 | Forced expiratory volume in 1-second (FEV1), Best measure | genus.RuminococcaceaeNK4A214group.id.11358 | Outlier-corrected | -0.000778626100221702 | 0.012469381 | -0.062443042 | 0.951330209 | rs6681678  | 0.019  |
| 293 | Forced expiratory volume in 1-second (FEV1), Best measure | genus.RuminococcaceaeUCG002.id.11360       | Raw               | -0.00359103330213561  | 0.009760574 | -0.367912094 | 0.717005528 |            |        |
| 294 | Forced expiratory volume in 1-second (FEV1), Best measure | genus.RuminococcaceaeUCG002.id.11360       | Outlier-corrected |                       |             |              |             |            | 0.065  |
| 295 | Forced expiratory volume in 1-second (FEV1), Best measure | genus.RuminococcaceaeUCG003.id.11361       | Raw               | 0.00611384885789527   | 0.015718068 | 0.388969477  | 0.704722666 |            |        |
| 296 | Forced expiratory volume in 1-second (FEV1), Best measure | genus.RuminococcaceaeUCG003.id.11361       | Outlier-corrected | -0.00362272481319117  | 0.012634084 | -0.286742193 | 0.780162965 | rs2523124  | 0.005  |
| 297 | Forced expiratory volume in 1-second (FEV1), Best measure | genus.RuminococcaceaeUCG004.id.11362       | Raw               | 0.000453716148306719  | 0.015028449 | 0.030190483  | 0.976654729 |            |        |
| 298 | Forced expiratory volume in 1-second (FEV1), Best measure | genus.RuminococcaceaeUCG004.id.11362       | Outlier-corrected |                       |             |              |             | NA         | 0.018  |
| 299 | Forced expiratory volume in 1-second (FEV1), Best measure | genus.RuminococcaceaeUCG005.id.11363       | Raw               | -0.0128700968954627   | 0.012356766 | -1.041542488 | 0.316607269 |            |        |
| 300 | Forced expiratory volume in 1-second (FEV1), Best measure | genus.RuminococcaceaeUCG005.id.11363       | Outlier-corrected | -0.0201715905987851   | 0.010587852 | -1.905163676 | 0.080997094 | rs7586445  | 0.048  |
| 301 | Forced expiratory volume in 1-second (FEV1), Best measure | genus.RuminococcaceaeUCG009.id.11366       | Raw               | -0.00381167701202853  | 0.01040341  | -0.366387287 | 0.721025698 |            |        |
| 302 | Forced expiratory volume in 1-second (FEV1), Best measure | genus.RuminococcaceaeUCG009.id.11366       | Outlier-corrected |                       |             |              |             | NA         | 0.045  |
| 303 | Forced expiratory volume in 1-second (FEV1), Best measure | genus.RuminococcaceaeUCG010.id.11367       | Raw               | 0.0194742039137031    | 0.008252685 | 2.359741465  | 0.064771812 |            |        |
| 304 | Forced expiratory volume in 1-second (FEV1), Best measure | genus.RuminococcaceaeUCG010.id.11367       | Outlier-corrected |                       |             |              |             |            | 0.881  |
| 305 | Forced expiratory volume in 1-second (FEV1), Best measure | genus.RuminococcaceaeUCG011.id.11368       | Raw               | -0.00490584486110557  | 0.011602325 | -0.422832906 | 0.687152308 |            |        |
| 306 | Forced expiratory volume in 1-second (FEV1), Best measure | genus.RuminococcaceaeUCG011.id.11368       | Outlier-corrected | 0.00235537417028364   | 0.010227914 | 0.230288812  | 0.826992783 | rs10274562 | 0.014  |

|     | A                                                         | B                                    | C                 | D                     | E           | F            | G           | H                    | I      |
|-----|-----------------------------------------------------------|--------------------------------------|-------------------|-----------------------|-------------|--------------|-------------|----------------------|--------|
| 307 | Forced expiratory volume in 1-second (FEV1), Best measure | genus.RuminococcaceaeUCG013.id.11370 | Raw               | -0.00147436451610294  | 0.013826444 | -0.106633674 | 0.916999497 |                      |        |
| 308 | Forced expiratory volume in 1-second (FEV1), Best measure | genus.RuminococcaceaeUCG013.id.11370 | Outlier-corrected | 0.00653126865000457   | 0.011285119 | 0.578750537  | 0.575560223 | rs12485353           | 0.049  |
| 309 | Forced expiratory volume in 1-second (FEV1), Best measure | genus.RuminococcaceaeUCG014.id.11371 | Raw               | 0.00308712242194977   | 0.009813386 | 0.314582794  | 0.759543847 |                      |        |
| 310 | Forced expiratory volume in 1-second (FEV1), Best measure | genus.RuminococcaceaeUCG014.id.11371 | Outlier-corrected |                       |             |              |             |                      | 0.531  |
| 311 | Forced expiratory volume in 1-second (FEV1), Best measure | genus.Ruminococcus1.id.11373         | Raw               | 0.0162456524895231    | 0.012624286 | 1.286857162  | 0.23025529  |                      |        |
| 312 | Forced expiratory volume in 1-second (FEV1), Best measure | genus.Ruminococcus1.id.11373         | Outlier-corrected |                       |             |              |             |                      | 0.285  |
| 313 | Forced expiratory volume in 1-second (FEV1), Best measure | genus.Ruminococcus2.id.11374         | Raw               | 0.00130283040517846   | 0.007501459 | 0.173676929  | 0.864794612 |                      |        |
| 314 | Forced expiratory volume in 1-second (FEV1), Best measure | genus.Ruminococcus2.id.11374         | Outlier-corrected |                       |             |              |             |                      | 0.811  |
| 315 | Forced expiratory volume in 1-second (FEV1), Best measure | genus.Sellimonas.id.14369            | Raw               | -0.00831826814547925  | 0.008896885 | -0.934964059 | 0.38092968  |                      |        |
| 316 | Forced expiratory volume in 1-second (FEV1), Best measure | genus.Sellimonas.id.14369            | Outlier-corrected | -0.0023508660141492   | 0.007318447 | -0.321224727 | 0.758934946 | rs113379006          | 0.038  |
| 317 | Forced expiratory volume in 1-second (FEV1), Best measure | genus.Senegalimassilia.id.11160      | Raw               | -0.0281825380877685   | 0.010398839 | -2.710161886 | 0.053528323 |                      |        |
| 318 | Forced expiratory volume in 1-second (FEV1), Best measure | genus.Senegalimassilia.id.11160      | Outlier-corrected |                       |             |              |             |                      | 0.528  |
| 319 | Forced expiratory volume in 1-second (FEV1), Best measure | genus.Slackia.id.825                 | Raw               | -0.000646081709006845 | 0.011001662 | -0.058725827 | 0.955445293 |                      |        |
| 320 | Forced expiratory volume in 1-second (FEV1), Best measure | genus.Slackia.id.825                 | Outlier-corrected |                       |             |              |             |                      | 0.336  |
| 321 | Forced expiratory volume in 1-second (FEV1), Best measure | genus.Streptococcus.id.1853          | Raw               | -0.00840749713870756  | 0.016458136 | -0.51084141  | 0.618026381 |                      |        |
| 322 | Forced expiratory volume in 1-second (FEV1), Best measure | genus.Streptococcus.id.1853          | Outlier-corrected | -0.0160656805651528   | 0.015440972 | -1.040457828 | 0.318637222 | rs4968759            | 0.002  |
| 323 | Forced expiratory volume in 1-second (FEV1), Best measure | genus.Subdoligranulum.id.2070        | Raw               | -0.000987105247928203 | 0.017236053 | -0.057269798 | 0.955581616 |                      |        |
| 324 | Forced expiratory volume in 1-second (FEV1), Best measure | genus.Subdoligranulum.id.2070        | Outlier-corrected |                       |             |              |             | NA                   | 0.038  |
| 325 | Forced expiratory volume in 1-second (FEV1), Best measure | genus.Sutterella.id.2896             | Raw               | 0.00103640446844178   | 0.015915059 | 0.065120995  | 0.94924609  |                      |        |
| 326 | Forced expiratory volume in 1-second (FEV1), Best measure | genus.Sutterella.id.2896             | Outlier-corrected | -0.0102800928588814   | 0.011629975 | -0.883930759 | 0.397487273 | rs7638039            | 0.003  |
| 327 | Forced expiratory volume in 1-second (FEV1), Best measure | genus.Terrisporobacter.id.11348      | Raw               | -0.0159412375991648   | 0.008836428 | -1.804036404 | 0.145553255 |                      |        |
| 328 | Forced expiratory volume in 1-second (FEV1), Best measure | genus.Terrisporobacter.id.11348      | Outlier-corrected |                       |             |              |             |                      | 0.623  |
| 329 | Forced expiratory volume in 1-second (FEV1), Best measure | genus.Turicibacter.id.2162           | Raw               | 0.0170740132499887    | 0.006993292 | 2.441484439  | 0.037273766 |                      |        |
| 330 | Forced expiratory volume in 1-second (FEV1), Best measure | genus.Turicibacter.id.2162           | Outlier-corrected |                       |             |              |             |                      | 0.805  |
| 331 | Forced expiratory volume in 1-second (FEV1), Best measure | genus.Tyzzerella3.id.11335           | Raw               | 0.00039418069556755   | 0.006696569 | 0.058863083  | 0.954116906 |                      |        |
| 332 | Forced expiratory volume in 1-second (FEV1), Best measure | genus.Tyzzerella3.id.11335           | Outlier-corrected |                       |             |              |             |                      | 0.23   |
| 333 | Forced expiratory volume in 1-second (FEV1), Best measure | genus.Veillonella.id.2198            | Raw               | 0.025762974990685     | 0.014403428 | 1.78866966   | 0.116804793 |                      |        |
| 334 | Forced expiratory volume in 1-second (FEV1), Best measure | genus.Veillonella.id.2198            | Outlier-corrected |                       |             |              |             |                      | 0.062  |
| 335 | Forced expiratory volume in 1-second (FEV1), Best measure | genus.Victivallis.id.2256            | Raw               | -0.00050725727179195  | 0.006735884 | -0.075306712 | 0.941618042 |                      |        |
| 336 | Forced expiratory volume in 1-second (FEV1), Best measure | genus.Victivallis.id.2256            | Outlier-corrected |                       |             |              |             |                      | 0.129  |
| 337 | Forced expiratory volume in 1-second (FEV1), Best measure | order.Actinomycetales.id.420         | Raw               | -0.00927715579197976  | 0.008750107 | -1.060233402 | 0.348813432 |                      |        |
| 338 | Forced expiratory volume in 1-second (FEV1), Best measure | order.Actinomycetales.id.420         | Outlier-corrected |                       |             |              |             |                      | 0.669  |
| 339 | Forced expiratory volume in 1-second (FEV1), Best measure | order.Bacillales.id.1674             | Raw               | 0.0117349077144991    | 0.009813105 | 1.195840481  | 0.270690992 |                      |        |
| 340 | Forced expiratory volume in 1-second (FEV1), Best measure | order.Bacillales.id.1674             | Outlier-corrected | 0.00553579136425964   | 0.009242888 | 0.598924427  | 0.57112793  | rs74420793           | 0.014  |
| 341 | Forced expiratory volume in 1-second (FEV1), Best measure | order.Bacteroidales.id.913           | Raw               | -0.012058803632462    | 0.016435304 | -0.733713434 | 0.479971743 |                      |        |
| 342 | Forced expiratory volume in 1-second (FEV1), Best measure | order.Bacteroidales.id.913           | Outlier-corrected |                       |             |              |             |                      | 0.091  |
| 343 | Forced expiratory volume in 1-second (FEV1), Best measure | order.Bifidobacteriales.id.432       | Raw               | -0.0214334629633997   | 0.01690826  | -1.267632666 | 0.236742091 |                      |        |
| 344 | Forced expiratory volume in 1-second (FEV1), Best measure | order.Bifidobacteriales.id.432       | Outlier-corrected | -0.00635273855605059  | 0.011012338 | -0.576874649 | 0.57989016  | rs4957061            | 0.036  |
| 345 | Forced expiratory volume in 1-second (FEV1), Best measure | order.Burkholderiales.id.2874        | Raw               | 0.0265838908761834    | 0.023150626 | 1.148301144  | 0.280448521 |                      |        |
| 346 | Forced expiratory volume in 1-second (FEV1), Best measure | order.Burkholderiales.id.2874        | Outlier-corrected | 0.0316254334159609    | 0.012899624 | 2.451655353  | 0.04400033  | rs6087811,rs7638039  | 0.002  |
| 347 | Forced expiratory volume in 1-second (FEV1), Best measure | order.Clostridiales.id.1863          | Raw               | 0.0374474502963038    | 0.01163502  | 3.218511786  | 0.007374815 |                      |        |
| 348 | Forced expiratory volume in 1-second (FEV1), Best measure | order.Clostridiales.id.1863          | Outlier-corrected |                       |             |              |             |                      | 0.479  |
| 349 | Forced expiratory volume in 1-second (FEV1), Best measure | order.Coriobacteriales.id.810        | Raw               | 0.00417184639146536   | 0.019832982 | 0.21034892   | 0.836656411 |                      |        |
| 350 | Forced expiratory volume in 1-second (FEV1), Best measure | order.Coriobacteriales.id.810        | Outlier-corrected | 0.00367865886829212   | 0.017307735 | 0.212544214  | 0.835569874 | rs2442778,rs34739816 | <0.001 |
| 351 | Forced expiratory volume in 1-second (FEV1), Best measure | order.Desulfovibrionales.id.3156     | Raw               | 0.029189841607643     | 0.008753383 | 3.334692729  | 0.006655666 |                      |        |
| 352 | Forced expiratory volume in 1-second (FEV1), Best measure | order.Desulfovibrionales.id.3156     | Outlier-corrected |                       |             |              |             |                      | 0.681  |
| 353 | Forced expiratory volume in 1-second (FEV1), Best measure | order.Enterobacteriales.id.3468      | Raw               | 0.00452512052323074   | 0.013198867 | 0.342841582  | 0.743409861 |                      |        |
| 354 | Forced expiratory volume in 1-second (FEV1), Best measure | order.Enterobacteriales.id.3468      | Outlier-corrected |                       |             |              |             |                      | 0.425  |
| 355 | Forced expiratory volume in 1-second (FEV1), Best measure | order.Erysipelotrichales.id.2148     | Raw               | 0.0311074758664724    | 0.011108852 | 2.800242246  | 0.016037042 |                      |        |
| 356 | Forced expiratory volume in 1-second (FEV1), Best measure | order.Erysipelotrichales.id.2148     | Outlier-corrected |                       |             |              |             |                      | 0.455  |
| 357 | Forced expiratory volume in 1-second (FEV1), Best measure | order.Gastranaerophilales.id.1591    | Raw               | -0.00215927649102783  | 0.014438207 | -0.149552957 | 0.884818861 |                      |        |

|     | A                                                         | B                                 | C                 | D                    | E           | F            | G           | H                              | I      |
|-----|-----------------------------------------------------------|-----------------------------------|-------------------|----------------------|-------------|--------------|-------------|--------------------------------|--------|
| 358 | Forced expiratory volume in 1-second (FEV1), Best measure | order.Gastranaerophilales.id.1591 | Outlier-corrected | -0.00886547744709026 | 0.008751049 | -1.013075931 | 0.350120202 | rs79790072,rs8028558           | <0.001 |
| 359 | Forced expiratory volume in 1-second (FEV1), Best measure | order.Lactobacillales.id.1800     | Raw               | -0.0160226350076166  | 0.010294698 | -1.556396819 | 0.143615446 |                                |        |
| 360 | Forced expiratory volume in 1-second (FEV1), Best measure | order.Lactobacillales.id.1800     | Outlier-corrected |                      |             |              |             |                                | 0.321  |
| 361 | Forced expiratory volume in 1-second (FEV1), Best measure | order.Methanobacteriales.id.120   | Raw               | 0.00547855384468051  | 0.006852712 | 0.799472392  | 0.450289056 |                                |        |
| 362 | Forced expiratory volume in 1-second (FEV1), Best measure | order.Methanobacteriales.id.120   | Outlier-corrected |                      |             |              |             |                                | 0.329  |
| 363 | Forced expiratory volume in 1-second (FEV1), Best measure | order.MollicutesRF9.id.11579      | Raw               | 0.00663144118337921  | 0.010209937 | 0.649508499  | 0.528246674 |                                |        |
| 364 | Forced expiratory volume in 1-second (FEV1), Best measure | order.MollicutesRF9.id.11579      | Outlier-corrected |                      |             |              |             |                                | 0.119  |
| 365 | Forced expiratory volume in 1-second (FEV1), Best measure | order.NB1n.id.3953                | Raw               | -0.00026925298013887 | 0.006907932 | -0.038977367 | 0.969549388 |                                |        |
| 366 | Forced expiratory volume in 1-second (FEV1), Best measure | order.NB1n.id.3953                | Outlier-corrected |                      |             |              |             |                                | 0.169  |
| 367 | Forced expiratory volume in 1-second (FEV1), Best measure | order.Pasteurellales.id.3688      | Raw               | 0.00992857479785471  | 0.007496115 | 1.324496147  | 0.208151966 |                                |        |
| 368 | Forced expiratory volume in 1-second (FEV1), Best measure | order.Pasteurellales.id.3688      | Outlier-corrected |                      |             |              |             |                                | 0.281  |
| 369 | Forced expiratory volume in 1-second (FEV1), Best measure | order.Rhodospirillales.id.2667    | Raw               | 0.0035013384701231   | 0.009134441 | 0.383311756  | 0.708192808 |                                |        |
| 370 | Forced expiratory volume in 1-second (FEV1), Best measure | order.Rhodospirillales.id.2667    | Outlier-corrected |                      |             |              |             |                                | 0.156  |
| 371 | Forced expiratory volume in 1-second (FEV1), Best measure | order.Selenomonadales.id.2165     | Raw               | -0.0163575788261091  | 0.00986185  | -1.658672431 | 0.128172369 |                                |        |
| 372 | Forced expiratory volume in 1-second (FEV1), Best measure | order.Selenomonadales.id.2165     | Outlier-corrected |                      |             |              |             |                                | 0.665  |
| 373 | Forced expiratory volume in 1-second (FEV1), Best measure | order.Verrucomicrobiales.id.4030  | Raw               | 0.011522874533035    | 0.014825865 | 0.7772143    | 0.455025139 |                                |        |
| 374 | Forced expiratory volume in 1-second (FEV1), Best measure | order.Verrucomicrobiales.id.4030  | Outlier-corrected | 0.00176128269708761  | 0.012849456 | 0.137070606  | 0.893992372 | rs74542928                     | 0.002  |
| 375 | Forced expiratory volume in 1-second (FEV1), Best measure | order.Victivallales.id.2254       | Raw               | -0.00287219292505578 | 0.010621069 | -0.270424087 | 0.794633695 |                                |        |
| 376 | Forced expiratory volume in 1-second (FEV1), Best measure | order.Victivallales.id.2254       | Outlier-corrected | -0.00958954317040308 | 0.009222087 | -1.039845177 | 0.338488236 | rs2825714                      | 0.02   |
| 377 | Forced expiratory volume in 1-second (FEV1), Best measure | phylum.Actinobacteria.id.400      | Raw               | 0.000596587024771477 | 0.017287411 | 0.034509912  | 0.972994797 |                                |        |
| 378 | Forced expiratory volume in 1-second (FEV1), Best measure | phylum.Actinobacteria.id.400      | Outlier-corrected | -0.00965665693843395 | 0.014482849 | -0.666765004 | 0.517537533 | rs11766971                     | <0.001 |
| 379 | Forced expiratory volume in 1-second (FEV1), Best measure | phylum.Bacteroidetes.id.905       | Raw               | -0.0153450107149099  | 0.015578178 | -0.985032441 | 0.353458012 |                                |        |
| 380 | Forced expiratory volume in 1-second (FEV1), Best measure | phylum.Bacteroidetes.id.905       | Outlier-corrected |                      |             |              |             |                                | 0.307  |
| 381 | Forced expiratory volume in 1-second (FEV1), Best measure | phylum.Cyanobacteria.id.1500      | Raw               | 0.015858328819633    | 0.011871273 | 1.335857493  | 0.223390579 |                                |        |
| 382 | Forced expiratory volume in 1-second (FEV1), Best measure | phylum.Cyanobacteria.id.1500      | Outlier-corrected |                      |             |              |             |                                | 0.068  |
| 383 | Forced expiratory volume in 1-second (FEV1), Best measure | phylum.Euryarchaeota.id.55        | Raw               | -0.0046348146493073  | 0.003282463 | -1.411993126 | 0.188304715 |                                |        |
| 384 | Forced expiratory volume in 1-second (FEV1), Best measure | phylum.Euryarchaeota.id.55        | Outlier-corrected |                      |             |              |             |                                | 0.964  |
| 385 | Forced expiratory volume in 1-second (FEV1), Best measure | phylum.Firmicutes.id.1672         | Raw               | -0.0125575874263744  | 0.017053409 | -0.736368161 | 0.472866597 |                                |        |
| 386 | Forced expiratory volume in 1-second (FEV1), Best measure | phylum.Firmicutes.id.1672         | Outlier-corrected | -0.00285770223131803 | 0.012230418 | -0.233655319 | 0.819191052 | rs2332027,rs2547978,rs6814436  | <0.001 |
| 387 | Forced expiratory volume in 1-second (FEV1), Best measure | phylum.Lentisphaerae.id.2238      | Raw               | -0.00417007926472518 | 0.009578216 | -0.435371194 | 0.674800461 |                                |        |
| 388 | Forced expiratory volume in 1-second (FEV1), Best measure | phylum.Lentisphaerae.id.2238      | Outlier-corrected | -0.0104016077415096  | 0.008131123 | -1.279233898 | 0.241583986 | rs2825714                      | 0.037  |
| 389 | Forced expiratory volume in 1-second (FEV1), Best measure | phylum.Proteobacteria.id.2375     | Raw               | 0.0199000496185419   | 0.021635032 | 0.919806809  | 0.379327124 |                                |        |
| 390 | Forced expiratory volume in 1-second (FEV1), Best measure | phylum.Proteobacteria.id.2375     | Outlier-corrected | 0.0330698282327079   | 0.016221875 | 2.038594734  | 0.080880437 | rs11715072,rs3890996,rs6707783 | <0.001 |
| 391 | Forced expiratory volume in 1-second (FEV1), Best measure | phylum.Tenericutes.id.3919        | Raw               | 0.00794049652806537  | 0.01350537  | 0.587951069  | 0.568439257 |                                |        |
| 392 | Forced expiratory volume in 1-second (FEV1), Best measure | phylum.Tenericutes.id.3919        | Outlier-corrected | 0.0163017485896426   | 0.01159848  | 1.405507264  | 0.190169566 | rs11890098                     | 0.007  |
| 393 | Forced expiratory volume in 1-second (FEV1), Best measure | phylum.Verrucomicrobia.id.3982    | Raw               | 0.0140931938854228   | 0.015219972 | 0.925967145  | 0.374332037 |                                |        |
| 394 | Forced expiratory volume in 1-second (FEV1), Best measure | phylum.Verrucomicrobia.id.3982    | Outlier-corrected | 0.00482588641798616  | 0.014095724 | 0.34236528   | 0.739162891 | rs74542928                     | 0.003  |
| 395 | Forced vital capacity (FVC), Best measure                 | class.Actinobacteria.id.419       | Raw               | -0.00983644986692519 | 0.013975929 | -0.703813667 | 0.494979784 |                                |        |
| 396 | Forced vital capacity (FVC), Best measure                 | class.Actinobacteria.id.419       | Outlier-corrected |                      |             |              |             | NA                             | 0.018  |
| 397 | Forced vital capacity (FVC), Best measure                 | class.Alphaproteobacteria.id.2379 | Raw               | 0.00684777677087755  | 0.008660147 | 0.790722899  | 0.459210408 |                                |        |
| 398 | Forced vital capacity (FVC), Best measure                 | class.Alphaproteobacteria.id.2379 | Outlier-corrected |                      |             |              |             |                                | 0.714  |
| 399 | Forced vital capacity (FVC), Best measure                 | class.Bacilli.id.1673             | Raw               | -0.0126938992026286  | 0.010194378 | -1.245186193 | 0.230992026 |                                |        |
| 400 | Forced vital capacity (FVC), Best measure                 | class.Bacilli.id.1673             | Outlier-corrected |                      |             |              |             |                                | 0.14   |
| 401 | Forced vital capacity (FVC), Best measure                 | class.Bacteroidia.id.912          | Raw               | -0.0214056604584015  | 0.016112735 | -1.328493299 | 0.213534194 |                                |        |
| 402 | Forced vital capacity (FVC), Best measure                 | class.Bacteroidia.id.912          | Outlier-corrected |                      |             |              |             |                                | 0.092  |
| 403 | Forced vital capacity (FVC), Best measure                 | class.Betaproteobacteria.id.2867  | Raw               | 0.020129773696107    | 0.016584763 | 1.213751098  | 0.250260094 |                                |        |
| 404 | Forced vital capacity (FVC), Best measure                 | class.Betaproteobacteria.id.2867  | Outlier-corrected | 0.0222275028059622   | 0.012716062 | 1.747986371  | 0.114405575 | rs11128180,rs6087811           | 0.005  |
| 405 | Forced vital capacity (FVC), Best measure                 | class.Clostridia.id.1859          | Raw               | 0.0353612387899261   | 0.01495054  | 2.365214846  | 0.037467236 |                                |        |
| 406 | Forced vital capacity (FVC), Best measure                 | class.Clostridia.id.1859          | Outlier-corrected |                      |             |              |             |                                | 0.079  |
| 407 | Forced vital capacity (FVC), Best measure                 | class.Coriobacteriia.id.809       | Raw               | -0.00974687913717225 | 0.017022204 | -0.572597964 | 0.576686458 |                                |        |
| 408 | Forced vital capacity (FVC), Best measure                 | class.Coriobacteriia.id.809       | Outlier-corrected | -0.01067967077102    | 0.01408229  | -0.758375974 | 0.464165007 | rs2442778,rs34739816           | <0.001 |

|     | A                                         | B                                           | C                 | D                    | E           | F            | G           | H                     | I      |
|-----|-------------------------------------------|---------------------------------------------|-------------------|----------------------|-------------|--------------|-------------|-----------------------|--------|
| 409 | Forced vital capacity (FVC), Best measure | class.Deltaproteobacteria.id.3087           | Raw               | 0.0344655338194224   | 0.009110238 | 3.783165204  | 0.002608504 |                       |        |
| 410 | Forced vital capacity (FVC), Best measure | class.Deltaproteobacteria.id.3087           | Outlier-corrected |                      |             |              |             |                       | 0.565  |
| 411 | Forced vital capacity (FVC), Best measure | class.Erysipelotrichia.id.2147              | Raw               | 0.0268924543331671   | 0.009815311 | 2.739847294  | 0.017936426 |                       |        |
| 412 | Forced vital capacity (FVC), Best measure | class.Erysipelotrichia.id.2147              | Outlier-corrected |                      |             |              |             |                       | 0.653  |
| 413 | Forced vital capacity (FVC), Best measure | class.Gammaproteobacteria.id.3303           | Raw               | 0.0189868166046828   | 0.01488859  | 1.275259572  | 0.249367679 |                       |        |
| 414 | Forced vital capacity (FVC), Best measure | class.Gammaproteobacteria.id.3303           | Outlier-corrected |                      |             |              |             |                       | 0.338  |
| 415 | Forced vital capacity (FVC), Best measure | class.Lentisphaeria.id.2250                 | Raw               | -0.00450730174026118 | 0.008710657 | -0.517446797 | 0.620789284 |                       |        |
| 416 | Forced vital capacity (FVC), Best measure | class.Lentisphaeria.id.2250                 | Outlier-corrected |                      |             |              |             |                       | 0.146  |
| 417 | Forced vital capacity (FVC), Best measure | class.Melainabacteria.id.1589               | Raw               | 0.00971148390045369  | 0.009952762 | 0.975757659  | 0.35468059  |                       |        |
| 418 | Forced vital capacity (FVC), Best measure | class.Melainabacteria.id.1589               | Outlier-corrected | 0.00136448730853576  | 0.007856987 | 0.173665477  | 0.866442293 | rs79790072            | 0.024  |
| 419 | Forced vital capacity (FVC), Best measure | class.Methanobacteria.id.119                | Raw               | 0.00458112153052943  | 0.005459476 | 0.839113746  | 0.429127116 |                       |        |
| 420 | Forced vital capacity (FVC), Best measure | class.Methanobacteria.id.119                | Outlier-corrected |                      |             |              |             |                       | 0.603  |
| 421 | Forced vital capacity (FVC), Best measure | class.Mollicutes.id.3920                    | Raw               | 0.00822132430961007  | 0.012128625 | 0.677844685  | 0.511876196 |                       |        |
| 422 | Forced vital capacity (FVC), Best measure | class.Mollicutes.id.3920                    | Outlier-corrected |                      |             |              |             | NA                    | 0.024  |
| 423 | Forced vital capacity (FVC), Best measure | class.Negativicutes.id.2164                 | Raw               | -0.0125851758871243  | 0.00979077  | -1.28541232  | 0.227618448 |                       |        |
| 424 | Forced vital capacity (FVC), Best measure | class.Negativicutes.id.2164                 | Outlier-corrected |                      |             |              |             |                       | 0.62   |
| 425 | Forced vital capacity (FVC), Best measure | class.Verrucomicrobiae.id.4029              | Raw               | 0.0144880476853596   | 0.014617858 | 0.991119721  | 0.345002666 |                       |        |
| 426 | Forced vital capacity (FVC), Best measure | class.Verrucomicrobiae.id.4029              | Outlier-corrected | 0.00335116433926983  | 0.011203942 | 0.299105839  | 0.771651053 | rs74542928            | <0.001 |
| 427 | Forced vital capacity (FVC), Best measure | family.Acidaminococcaceae.id.2166           | Raw               | 0.0064674241584173   | 0.023184605 | 0.278953394  | 0.789646012 |                       |        |
| 428 | Forced vital capacity (FVC), Best measure | family.Acidaminococcaceae.id.2166           | Outlier-corrected | -0.0161883823733302  | 0.009398253 | -1.722488443 | 0.145594288 | rs45497800            | 0.001  |
| 429 | Forced vital capacity (FVC), Best measure | family.Actinomycetaceae.id.421              | Raw               | -0.0109549850298502  | 0.007138345 | -1.534667365 | 0.199655295 |                       |        |
| 430 | Forced vital capacity (FVC), Best measure | family.Actinomycetaceae.id.421              | Outlier-corrected |                      |             |              |             |                       | 0.784  |
| 431 | Forced vital capacity (FVC), Best measure | family.Alcaligenaceae.id.2875               | Raw               | 0.0185468477124677   | 0.016290028 | 1.138539924  | 0.284293292 |                       |        |
| 432 | Forced vital capacity (FVC), Best measure | family.Alcaligenaceae.id.2875               | Outlier-corrected |                      |             |              |             |                       | 0.053  |
| 433 | Forced vital capacity (FVC), Best measure | family.Bacteroidaceae.id.917                | Raw               | 0.0050062306930537   | 0.011828069 | 0.423250057  | 0.683261631 |                       |        |
| 434 | Forced vital capacity (FVC), Best measure | family.Bacteroidaceae.id.917                | Outlier-corrected |                      |             |              |             |                       | 0.541  |
| 435 | Forced vital capacity (FVC), Best measure | family.BacteroidalesS24.7group.id.11173     | Raw               | 0.0254794355782361   | 0.007211046 | 3.533389506  | 0.009554242 |                       |        |
| 436 | Forced vital capacity (FVC), Best measure | family.BacteroidalesS24.7group.id.11173     | Outlier-corrected |                      |             |              |             |                       | 0.721  |
| 437 | Forced vital capacity (FVC), Best measure | family.Bifidobacteriaceae.id.433            | Raw               | -0.0207167651517699  | 0.015289896 | -1.354931731 | 0.208468753 |                       |        |
| 438 | Forced vital capacity (FVC), Best measure | family.Bifidobacteriaceae.id.433            | Outlier-corrected |                      |             |              |             |                       | 0.083  |
| 439 | Forced vital capacity (FVC), Best measure | family.Christensenellaceae.id.1866          | Raw               | 0.00118644887261407  | 0.014132813 | 0.083949945  | 0.934753041 |                       |        |
| 440 | Forced vital capacity (FVC), Best measure | family.Christensenellaceae.id.1866          | Outlier-corrected | -0.00889402589557779 | 0.009570769 | -0.929290589 | 0.376989866 | rs72706624            | 0.047  |
| 441 | Forced vital capacity (FVC), Best measure | family.Clostridiaceae1.id.1869              | Raw               | -0.00486740913143159 | 0.01904022  | -0.25563828  | 0.8039768   |                       |        |
| 442 | Forced vital capacity (FVC), Best measure | family.Clostridiaceae1.id.1869              | Outlier-corrected | -0.00799111231604359 | 0.013754365 | -0.580987372 | 0.5794659   | rs12186080,rs12341505 | 0.001  |
| 443 | Forced vital capacity (FVC), Best measure | family.ClostridialesvadinBB60group.id.11286 | Raw               | 5.80539078111185e-05 | 0.009197763 | 0.006311742  | 0.995059822 |                       |        |
| 444 | Forced vital capacity (FVC), Best measure | family.ClostridialesvadinBB60group.id.11286 | Outlier-corrected |                      |             |              |             |                       | 0.182  |
| 445 | Forced vital capacity (FVC), Best measure | family.Coriobacteriaceae.id.811             | Raw               | -0.00974687913717225 | 0.017022204 | -0.572597964 | 0.576686458 |                       |        |
| 446 | Forced vital capacity (FVC), Best measure | family.Coriobacteriaceae.id.811             | Outlier-corrected | -0.01067967077102    | 0.01408229  | -0.758375974 | 0.464165007 | rs2442778,rs34739816  | <0.001 |
| 447 | Forced vital capacity (FVC), Best measure | family.Defluviitaleaceae.id.1924            | Raw               | 0.0046383575563404   | 0.00737218  | 0.629170417  | 0.543342256 |                       |        |
| 448 | Forced vital capacity (FVC), Best measure | family.Defluviitaleaceae.id.1924            | Outlier-corrected |                      |             |              |             |                       | 0.508  |
| 449 | Forced vital capacity (FVC), Best measure | family.Desulfovibrionaceae.id.3169          | Raw               | 0.0335355270722151   | 0.01071125  | 3.130869739  | 0.012104728 |                       |        |
| 450 | Forced vital capacity (FVC), Best measure | family.Desulfovibrionaceae.id.3169          | Outlier-corrected |                      |             |              |             |                       | 0.407  |
| 451 | Forced vital capacity (FVC), Best measure | family.Enterobacteriaceae.id.3469           | Raw               | 0.00526755401172004  | 0.013606926 | 0.387122999  | 0.712023858 |                       |        |
| 452 | Forced vital capacity (FVC), Best measure | family.Enterobacteriaceae.id.3469           | Outlier-corrected |                      |             |              |             |                       | 0.365  |
| 453 | Forced vital capacity (FVC), Best measure | family.Erysipelotrichaceae.id.2149          | Raw               | 0.0268924543331671   | 0.009815311 | 2.739847294  | 0.017936426 |                       |        |
| 454 | Forced vital capacity (FVC), Best measure | family.Erysipelotrichaceae.id.2149          | Outlier-corrected |                      |             |              |             |                       | 0.636  |
| 455 | Forced vital capacity (FVC), Best measure | family.FamilyXI.id.1936                     | Raw               | -0.0096346451214549  | 0.005446345 | -1.769011029 | 0.120209917 |                       |        |
| 456 | Forced vital capacity (FVC), Best measure | family.FamilyXI.id.1936                     | Outlier-corrected |                      |             |              |             |                       | 0.507  |
| 457 | Forced vital capacity (FVC), Best measure | family.FamilyXIII.id.1957                   | Raw               | -0.0112167187879276  | 0.017683506 | -0.634304012 | 0.541667455 |                       |        |
| 458 | Forced vital capacity (FVC), Best measure | family.FamilyXIII.id.1957                   | Outlier-corrected |                      |             |              |             | NA                    | 0.02   |
| 459 | Forced vital capacity (FVC), Best measure | family.Lachnospiraceae.id.1987              | Raw               | -0.0247541030243356  | 0.013522318 | -1.830610969 | 0.085848327 |                       |        |

|     | A                                         | B                                                 | C                 | D                     | E           | F            | G           | H                    | I      |
|-----|-------------------------------------------|---------------------------------------------------|-------------------|-----------------------|-------------|--------------|-------------|----------------------|--------|
| 460 | Forced vital capacity (FVC), Best measure | family.Lachnospiraceae.id.1987                    | Outlier-corrected |                       |             |              |             | NA                   | 0.005  |
| 461 | Forced vital capacity (FVC), Best measure | family.Lactobacillaceae.id.1836                   | Raw               | -0.0138045727165289   | 0.011356997 | -1.215512607 | 0.263569827 |                      |        |
| 462 | Forced vital capacity (FVC), Best measure | family.Lactobacillaceae.id.1836                   | Outlier-corrected |                       |             |              |             |                      | 0.058  |
| 463 | Forced vital capacity (FVC), Best measure | family.Methanobacteriaceae.id.121                 | Raw               | 0.00458112153052943   | 0.005459476 | 0.839113746  | 0.429127116 |                      |        |
| 464 | Forced vital capacity (FVC), Best measure | family.Methanobacteriaceae.id.121                 | Outlier-corrected |                       |             |              |             |                      | 0.557  |
| 465 | Forced vital capacity (FVC), Best measure | family.Oxalobacteraceae.id.2966                   | Raw               | 0.010199479026615     | 0.006834603 | 1.492329492  | 0.159478658 |                      |        |
| 466 | Forced vital capacity (FVC), Best measure | family.Oxalobacteraceae.id.2966                   | Outlier-corrected |                       |             |              |             |                      | 0.079  |
| 467 | Forced vital capacity (FVC), Best measure | family.Pasteurellaceae.id.3689                    | Raw               | 0.0137529794779012    | 0.008689343 | 1.582741026  | 0.137495623 |                      |        |
| 468 | Forced vital capacity (FVC), Best measure | family.Pasteurellaceae.id.3689                    | Outlier-corrected |                       |             |              |             | NA                   | 0.045  |
| 469 | Forced vital capacity (FVC), Best measure | family.Peptococcaceae.id.2024                     | Raw               | 0.00964900257456538   | 0.008533145 | 1.130767419  | 0.29091065  |                      |        |
| 470 | Forced vital capacity (FVC), Best measure | family.Peptococcaceae.id.2024                     | Outlier-corrected |                       |             |              |             |                      | 0.472  |
| 471 | Forced vital capacity (FVC), Best measure | family.Peptostreptococcaceae.id.2042              | Raw               | -0.000288587787098996 | 0.014672793 | -0.019668225 | 0.984631288 |                      |        |
| 472 | Forced vital capacity (FVC), Best measure | family.Peptostreptococcaceae.id.2042              | Outlier-corrected | 0.00769101096389512   | 0.010278095 | 0.748291499  | 0.471516661 | rs12377846,rs1467258 | <0.001 |
| 473 | Forced vital capacity (FVC), Best measure | family.Porphyromonadaceae.id.943                  | Raw               | 0.00256115107560086   | 0.01572456  | 0.162875853  | 0.874655301 |                      |        |
| 474 | Forced vital capacity (FVC), Best measure | family.Porphyromonadaceae.id.943                  | Outlier-corrected |                       |             |              |             |                      | 0.186  |
| 475 | Forced vital capacity (FVC), Best measure | family.Prevotellaceae.id.960                      | Raw               | 0.00234624054847659   | 0.008583032 | 0.273357997  | 0.788569312 |                      |        |
| 476 | Forced vital capacity (FVC), Best measure | family.Prevotellaceae.id.960                      | Outlier-corrected |                       |             |              |             |                      | 0.486  |
| 477 | Forced vital capacity (FVC), Best measure | family.Rhodospirillaceae.id.2717                  | Raw               | -0.00789886252732656  | 0.009438566 | -0.836871063 | 0.417783971 |                      |        |
| 478 | Forced vital capacity (FVC), Best measure | family.Rhodospirillaceae.id.2717                  | Outlier-corrected |                       |             |              |             |                      | 0.055  |
| 479 | Forced vital capacity (FVC), Best measure | family.Rikenellaceae.id.967                       | Raw               | 0.0143386535565997    | 0.007344398 | 1.952325255  | 0.066631573 |                      |        |
| 480 | Forced vital capacity (FVC), Best measure | family.Rikenellaceae.id.967                       | Outlier-corrected |                       |             |              |             |                      | 0.799  |
| 481 | Forced vital capacity (FVC), Best measure | family.Ruminococcaceae.id.2050                    | Raw               | -0.00908119625405671  | 0.014401736 | -0.63056262  | 0.544003675 |                      |        |
| 482 | Forced vital capacity (FVC), Best measure | family.Ruminococcaceae.id.2050                    | Outlier-corrected |                       |             |              |             |                      | 0.071  |
| 483 | Forced vital capacity (FVC), Best measure | family.Streptococcaceae.id.1850                   | Raw               | 0.0164007260024112    | 0.015777042 | 1.039531091  | 0.320868148 |                      |        |
| 484 | Forced vital capacity (FVC), Best measure | family.Streptococcaceae.id.1850                   | Outlier-corrected |                       |             |              |             | NA                   | 0.009  |
| 485 | Forced vital capacity (FVC), Best measure | family.Veillonellaceae.id.2172                    | Raw               | -0.00386077753333329  | 0.00855419  | -0.451331757 | 0.657140868 |                      |        |
| 486 | Forced vital capacity (FVC), Best measure | family.Veillonellaceae.id.2172                    | Outlier-corrected |                       |             |              |             |                      | 0.145  |
| 487 | Forced vital capacity (FVC), Best measure | family.Verrucomicrobiaceae.id.4036                | Raw               | 0.0144820636125803    | 0.014622046 | 0.990426598  | 0.345324953 |                      |        |
| 488 | Forced vital capacity (FVC), Best measure | family.Verrucomicrobiaceae.id.4036                | Outlier-corrected | 0.00334323084031076   | 0.011206575 | 0.298327613  | 0.772225941 | rs74542928           | 0.003  |
| 489 | Forced vital capacity (FVC), Best measure | family.Victivallaceae.id.2255                     | Raw               | -0.00500767948988709  | 0.006516151 | -0.768502686 | 0.458370494 |                      |        |
| 490 | Forced vital capacity (FVC), Best measure | family.Victivallaceae.id.2255                     | Outlier-corrected |                       |             |              |             |                      | 0.058  |
| 491 | Forced vital capacity (FVC), Best measure | genus..Clostridiuminnocuumgroup.id.14397          | Raw               | 0.00386453488976523   | 0.003613555 | 1.069455217  | 0.316067961 |                      |        |
| 492 | Forced vital capacity (FVC), Best measure | genus..Clostridiuminnocuumgroup.id.14397          | Outlier-corrected |                       |             |              |             |                      | 0.958  |
| 493 | Forced vital capacity (FVC), Best measure | genus..Eubacteriumbrachygroup.id.11296            | Raw               | -0.00674920240504164  | 0.008585797 | -0.786089198 | 0.452014526 |                      |        |
| 494 | Forced vital capacity (FVC), Best measure | genus..Eubacteriumbrachygroup.id.11296            | Outlier-corrected |                       |             |              |             | NA                   | 0.027  |
| 495 | Forced vital capacity (FVC), Best measure | genus..Eubacteriumcoprostanoligenesgroup.id.11375 | Raw               | -0.0189425816790324   | 0.011927619 | -1.588127668 | 0.138242765 |                      |        |
| 496 | Forced vital capacity (FVC), Best measure | genus..Eubacteriumcoprostanoligenesgroup.id.11375 | Outlier-corrected |                       |             |              |             |                      | 0.236  |
| 497 | Forced vital capacity (FVC), Best measure | genus..Eubacteriumeligensgroup.id.14372           | Raw               | -0.00612659337348136  | 0.012211076 | -0.501724275 | 0.633736407 |                      |        |
| 498 | Forced vital capacity (FVC), Best measure | genus..Eubacteriumeligensgroup.id.14372           | Outlier-corrected |                       |             |              |             |                      | 0.505  |
| 499 | Forced vital capacity (FVC), Best measure | genus..Eubacteriumfissicatenagroup.id.14373       | Raw               | -0.00846685680140695  | 0.011053302 | -0.766002513 | 0.46871261  |                      |        |
| 500 | Forced vital capacity (FVC), Best measure | genus..Eubacteriumfissicatenagroup.id.14373       | Outlier-corrected | -0.0183742851477668   | 0.005884887 | -3.122283477 | 0.020525154 | rs7104872            | 0.009  |
| 501 | Forced vital capacity (FVC), Best measure | genus..Eubacteriumhalliigroup.id.11338            | Raw               | -0.00488076228515838  | 0.007861964 | -0.620807019 | 0.544045121 |                      |        |
| 502 | Forced vital capacity (FVC), Best measure | genus..Eubacteriumhalliigroup.id.11338            | Outlier-corrected |                       |             |              |             |                      | 0.597  |
| 503 | Forced vital capacity (FVC), Best measure | genus..Eubacteriumnodatumgroup.id.11297           | Raw               | 0.00523087026590206   | 0.007558152 | 0.692083213  | 0.504637011 |                      |        |
| 504 | Forced vital capacity (FVC), Best measure | genus..Eubacteriumnodatumgroup.id.11297           | Outlier-corrected | 0.00506881104718163   | 0.004414357 | 1.148255735  | 0.284036743 | rs10458299,rs9425984 | 0.014  |
| 505 | Forced vital capacity (FVC), Best measure | genus..Eubacteriumoxidoreducensgroup.id.11339     | Raw               | 0.0080521542291989    | 0.01025089  | 0.785507794  | 0.476073791 |                      |        |
| 506 | Forced vital capacity (FVC), Best measure | genus..Eubacteriumoxidoreducensgroup.id.11339     | Outlier-corrected |                       |             |              |             |                      | 0.294  |
| 507 | Forced vital capacity (FVC), Best measure | genus..Eubacteriumrectalegroup.id.14374           | Raw               | -0.0121957306471517   | 0.018668287 | -0.65328599  | 0.534433376 |                      |        |
| 508 | Forced vital capacity (FVC), Best measure | genus..Eubacteriumrectalegroup.id.14374           | Outlier-corrected |                       |             |              |             |                      | 0.051  |
| 509 | Forced vital capacity (FVC), Best measure | genus..Eubacteriumruminantiumgroup.id.11340       | Raw               | 0.00808118704268668   | 0.006644125 | 1.216290665  | 0.240493137 |                      |        |
| 510 | Forced vital capacity (FVC), Best measure | genus..Eubacteriumruminantiumgroup.id.11340       | Outlier-corrected |                       |             |              |             |                      | 0.245  |

|     | A                                         | B                                            | C                 | D                    | E           | F            | G           | H                     | I      |
|-----|-------------------------------------------|----------------------------------------------|-------------------|----------------------|-------------|--------------|-------------|-----------------------|--------|
| 511 | Forced vital capacity (FVC), Best measure | genus..Eubacteriumventriosumgroup.id.11341   | Raw               | -0.00566101168234053 | 0.012611793 | -0.448866537 | 0.660919127 |                       |        |
| 512 | Forced vital capacity (FVC), Best measure | genus..Eubacteriumventriosumgroup.id.11341   | Outlier-corrected |                      |             |              |             |                       | 0.053  |
| 513 | Forced vital capacity (FVC), Best measure | genus..Eubacteriumxylanophilumgroup.id.14375 | Raw               | 0.0281573363294595   | 0.019200586 | 1.466483192  | 0.180690764 |                       |        |
| 514 | Forced vital capacity (FVC), Best measure | genus..Eubacteriumxylanophilumgroup.id.14375 | Outlier-corrected | 0.0144844669747841   | 0.014969625 | 0.967590509  | 0.365482325 | rs10917203            | 0.003  |
| 515 | Forced vital capacity (FVC), Best measure | genus..Ruminococcusgavreauigroup.id.11342    | Raw               | 0.0210017477942048   | 0.017738379 | 1.183972199  | 0.261377598 |                       |        |
| 516 | Forced vital capacity (FVC), Best measure | genus..Ruminococcusgavreauigroup.id.11342    | Outlier-corrected | 0.0218466123825187   | 0.0150262   | 1.453901371  | 0.179939083 | rs2166943,rs289410    | 0.001  |
| 517 | Forced vital capacity (FVC), Best measure | genus..Ruminococcusgnavusgroup.id.14376      | Raw               | 0.00445997461329319  | 0.011267356 | 0.395831506  | 0.700542877 |                       |        |
| 518 | Forced vital capacity (FVC), Best measure | genus..Ruminococcusgnavusgroup.id.14376      | Outlier-corrected | 0.00609692113029209  | 0.009664684 | 0.630845382  | 0.545737656 | rs2909242,rs78399089  | 0.003  |
| 519 | Forced vital capacity (FVC), Best measure | genus..Ruminococcustorquesgroup.id.14377     | Raw               | 0.0197161928329288   | 0.010394138 | 1.896856879  | 0.094423859 |                       |        |
| 520 | Forced vital capacity (FVC), Best measure | genus..Ruminococcustorquesgroup.id.14377     | Outlier-corrected |                      |             |              |             |                       | 0.653  |
| 521 | Forced vital capacity (FVC), Best measure | genus.Actinomyces.id.423                     | Raw               | -0.0157399579606838  | 0.012896378 | -1.220494504 | 0.26806326  |                       |        |
| 522 | Forced vital capacity (FVC), Best measure | genus.Actinomyces.id.423                     | Outlier-corrected |                      |             |              |             |                       | 0.092  |
| 523 | Forced vital capacity (FVC), Best measure | genus.Adlercreutzia.id.812                   | Raw               | 0.00630997488530685  | 0.018222837 | 0.346267428  | 0.739316443 |                       |        |
| 524 | Forced vital capacity (FVC), Best measure | genus.Adlercreutzia.id.812                   | Outlier-corrected | 0.000311058192207988 | 0.011423682 | 0.027229241  | 0.979330261 | rs7680684,rs9490822   | <0.001 |
| 525 | Forced vital capacity (FVC), Best measure | genus.Akkermansia.id.4037                    | Raw               | 0.0145037674190562   | 0.014610662 | 0.992683814  | 0.344276211 |                       |        |
| 526 | Forced vital capacity (FVC), Best measure | genus.Akkermansia.id.4037                    | Outlier-corrected | 0.00332822563072332  | 0.011205426 | 0.297019117  | 0.773192879 | rs74542928            | 0.005  |
| 527 | Forced vital capacity (FVC), Best measure | genus.Alistipes.id.968                       | Raw               | 0.0116327846754288   | 0.014683654 | 0.792226808  | 0.442445826 |                       |        |
| 528 | Forced vital capacity (FVC), Best measure | genus.Alistipes.id.968                       | Outlier-corrected | 0.000305339787050961 | 0.010593752 | 0.028822629  | 0.977479859 | rs12990744            | 0.027  |
| 529 | Forced vital capacity (FVC), Best measure | genus.Allisonella.id.2174                    | Raw               | -0.00645930902494823 | 0.005468721 | -1.181137115 | 0.276118382 |                       |        |
| 530 | Forced vital capacity (FVC), Best measure | genus.Allisonella.id.2174                    | Outlier-corrected |                      |             |              |             |                       | 0.478  |
| 531 | Forced vital capacity (FVC), Best measure | genus.Alloprevotella.id.961                  | Raw               | 0.00115958812574249  | 0.010341524 | 0.112129329  | 0.915083337 |                       |        |
| 532 | Forced vital capacity (FVC), Best measure | genus.Alloprevotella.id.961                  | Outlier-corrected |                      |             |              |             |                       | 0.065  |
| 533 | Forced vital capacity (FVC), Best measure | genus.Anaerofilum.id.2053                    | Raw               | 0.00129953889339795  | 0.008938911 | 0.145379994  | 0.887299436 |                       |        |
| 534 | Forced vital capacity (FVC), Best measure | genus.Anaerofilum.id.2053                    | Outlier-corrected | 0.00769712004389002  | 0.007389978 | 1.041561978  | 0.324784739 | rs79598899            | 0.015  |
| 535 | Forced vital capacity (FVC), Best measure | genus.Anaerostipes.id.1991                   | Raw               | 0.0270331591957526   | 0.012928673 | 2.090946169  | 0.0605415   |                       |        |
| 536 | Forced vital capacity (FVC), Best measure | genus.Anaerostipes.id.1991                   | Outlier-corrected |                      |             |              |             |                       | 0.15   |
| 537 | Forced vital capacity (FVC), Best measure | genus.Anaerotruncus.id.2054                  | Raw               | 0.0182269550497548   | 0.0165964   | 1.09824753   | 0.293643872 |                       |        |
| 538 | Forced vital capacity (FVC), Best measure | genus.Anaerotruncus.id.2054                  | Outlier-corrected | 0.0207358595379034   | 0.013646229 | 1.519530335  | 0.15959433  | rs10150232,rs11018566 | 0.001  |
| 539 | Forced vital capacity (FVC), Best measure | genus.Bacteroides.id.918                     | Raw               | 0.0050062306930537   | 0.011828069 | 0.423250057  | 0.683261631 |                       |        |
| 540 | Forced vital capacity (FVC), Best measure | genus.Bacteroides.id.918                     | Outlier-corrected |                      |             |              |             |                       | 0.549  |
| 541 | Forced vital capacity (FVC), Best measure | genus.Barnesiella.id.944                     | Raw               | -0.0160030750726999  | 0.013841327 | -1.15618072  | 0.268413537 |                       |        |
| 542 | Forced vital capacity (FVC), Best measure | genus.Barnesiella.id.944                     | Outlier-corrected | -0.0254258319269837  | 0.010364697 | -2.453118629 | 0.030419147 | rs13242616            | 0.003  |
| 543 | Forced vital capacity (FVC), Best measure | genus.Bifidobacterium.id.436                 | Raw               | -0.00942692998001703 | 0.018003427 | -0.523618635 | 0.611950093 |                       |        |
| 544 | Forced vital capacity (FVC), Best measure | genus.Bifidobacterium.id.436                 | Outlier-corrected | -0.00923041316242827 | 0.014428107 | -0.639752209 | 0.540217707 | rs56108664,rs62181700 | <0.001 |
| 545 | Forced vital capacity (FVC), Best measure | genus.Bilophila.id.3170                      | Raw               | 3.60755981436627e-05 | 0.011250671 | 0.003206529  | 0.997498978 |                       |        |
| 546 | Forced vital capacity (FVC), Best measure | genus.Bilophila.id.3170                      | Outlier-corrected |                      |             |              |             |                       | 0.173  |
| 547 | Forced vital capacity (FVC), Best measure | genus.Blautia.id.1992                        | Raw               | -0.00738868795100143 | 0.009829562 | -0.751680312 | 0.468021719 |                       |        |
| 548 | Forced vital capacity (FVC), Best measure | genus.Blautia.id.1992                        | Outlier-corrected |                      |             |              |             |                       | 0.504  |
| 549 | Forced vital capacity (FVC), Best measure | genus.Butyricoccus.id.2055                   | Raw               | 0.0127585118834766   | 0.020070808 | 0.635675043  | 0.545201139 |                       |        |
| 550 | Forced vital capacity (FVC), Best measure | genus.Butyricoccus.id.2055                   | Outlier-corrected | 0.0325058355951553   | 0.007765267 | 4.186055099  | 0.00860449  | rs10084203,rs12034718 | 0.003  |
| 551 | Forced vital capacity (FVC), Best measure | genus.Butyricimonas.id.945                   | Raw               | -0.0128716904186198  | 0.016579369 | -0.776367918 | 0.453902076 |                       |        |
| 552 | Forced vital capacity (FVC), Best measure | genus.Butyricimonas.id.945                   | Outlier-corrected | -0.0114325036832974  | 0.014158433 | -0.807469571 | 0.440214028 | rs11228830,rs62130338 | <0.001 |
| 553 | Forced vital capacity (FVC), Best measure | genus.Butyrivibrio.id.1993                   | Raw               | 0.00552677936104221  | 0.006186384 | 0.893377966  | 0.38675455  |                       |        |
| 554 | Forced vital capacity (FVC), Best measure | genus.Butyrivibrio.id.1993                   | Outlier-corrected |                      |             |              |             | NA                    | 0.013  |
| 555 | Forced vital capacity (FVC), Best measure | genus.CandidatusSoleaferrea.id.11350         | Raw               | 0.0065219776901679   | 0.014369875 | 0.453864608  | 0.661985728 |                       |        |
| 556 | Forced vital capacity (FVC), Best measure | genus.CandidatusSoleaferrea.id.11350         | Outlier-corrected | 0.0188477875113359   | 0.007466635 | 2.524268003  | 0.039562955 | rs7400877             | <0.001 |
| 557 | Forced vital capacity (FVC), Best measure | genus.Catenibacterium.id.2153                | Raw               | -0.00215911397412538 | 0.008063349 | -0.2677689   | 0.802117784 |                       |        |
| 558 | Forced vital capacity (FVC), Best measure | genus.Catenibacterium.id.2153                | Outlier-corrected |                      |             |              |             |                       | 0.35   |
| 559 | Forced vital capacity (FVC), Best measure | genus.ChristensenellaceaeR.7group.id.11283   | Raw               | 0.00221677096781994  | 0.012826443 | 0.172828199  | 0.866610753 |                       |        |
| 560 | Forced vital capacity (FVC), Best measure | genus.ChristensenellaceaeR.7group.id.11283   | Outlier-corrected |                      |             |              |             |                       | 0.323  |
| 561 | Forced vital capacity (FVC), Best measure | genus.Clostridiumsensustricto1.id.1873       | Raw               | 0.0246980582813591   | 0.016791843 | 1.470836618  | 0.19174118  |                       |        |

|     | A                                         | B                                        | C                 | D                    | E           | F            | G           | H                     | I      |
|-----|-------------------------------------------|------------------------------------------|-------------------|----------------------|-------------|--------------|-------------|-----------------------|--------|
| 562 | Forced vital capacity (FVC), Best measure | genus.Clostridiumsensustricto1.id.1873   | Outlier-corrected | 0.024197248899689    | 0.007324329 | 3.303681186  | 0.029830363 | rs12341505,rs2817172  | 0.047  |
| 563 | Forced vital capacity (FVC), Best measure | genus.Collinsella.id.815                 | Raw               | 0.00437923987801317  | 0.005770615 | 0.758886165  | 0.469686962 |                       |        |
| 564 | Forced vital capacity (FVC), Best measure | genus.Collinsella.id.815                 | Outlier-corrected |                      |             |              |             |                       | 0.983  |
| 565 | Forced vital capacity (FVC), Best measure | genus.Coprobacter.id.949                 | Raw               | -0.0144795692127354  | 0.008440149 | -1.715558537 | 0.117006029 |                       |        |
| 566 | Forced vital capacity (FVC), Best measure | genus.Coprobacter.id.949                 | Outlier-corrected |                      |             |              |             |                       | 0.149  |
| 567 | Forced vital capacity (FVC), Best measure | genus.Coproccoccus1.id.11301             | Raw               | 0.00685262510293585  | 0.009256406 | 0.740311674  | 0.474616293 |                       |        |
| 568 | Forced vital capacity (FVC), Best measure | genus.Coproccoccus1.id.11301             | Outlier-corrected |                      |             |              |             |                       | 0.435  |
| 569 | Forced vital capacity (FVC), Best measure | genus.Coproccoccus2.id.11302             | Raw               | -0.00656863221278671 | 0.015835682 | -0.414799441 | 0.690706046 |                       |        |
| 570 | Forced vital capacity (FVC), Best measure | genus.Coproccoccus2.id.11302             | Outlier-corrected |                      |             |              |             |                       | 0.05   |
| 571 | Forced vital capacity (FVC), Best measure | genus.Coproccoccus3.id.11303             | Raw               | -0.00736220413559251 | 0.014102445 | -0.522051615 | 0.615776955 |                       |        |
| 572 | Forced vital capacity (FVC), Best measure | genus.Coproccoccus3.id.11303             | Outlier-corrected |                      |             |              |             |                       | 0.185  |
| 573 | Forced vital capacity (FVC), Best measure | genus.DefluviitaleaceaeUCG011.id.11287   | Raw               | 0.00760142042402315  | 0.009281281 | 0.819005514  | 0.436499548 |                       |        |
| 574 | Forced vital capacity (FVC), Best measure | genus.DefluviitaleaceaeUCG011.id.11287   | Outlier-corrected |                      |             |              |             |                       | 0.268  |
| 575 | Forced vital capacity (FVC), Best measure | genus.Desulfovibrio.id.3173              | Raw               | 0.00722038843056557  | 0.0126261   | 0.571862138  | 0.581414921 |                       |        |
| 576 | Forced vital capacity (FVC), Best measure | genus.Desulfovibrio.id.3173              | Outlier-corrected |                      |             |              |             | NA                    | 0.044  |
| 577 | Forced vital capacity (FVC), Best measure | genus.Dialister.id.2183                  | Raw               | 0.0096235900845392   | 0.011818451 | 0.814285203  | 0.436496187 |                       |        |
| 578 | Forced vital capacity (FVC), Best measure | genus.Dialister.id.2183                  | Outlier-corrected |                      |             |              |             |                       | 0.191  |
| 579 | Forced vital capacity (FVC), Best measure | genus.Dorea.id.1997                      | Raw               | 0.019157176306384    | 0.013550375 | 1.413774599  | 0.191072057 |                       |        |
| 580 | Forced vital capacity (FVC), Best measure | genus.Dorea.id.1997                      | Outlier-corrected |                      |             |              |             |                       | 0.211  |
| 581 | Forced vital capacity (FVC), Best measure | genus.Eggerthella.id.819                 | Raw               | -0.001328214204467   | 0.011192033 | -0.118674968 | 0.907882959 |                       |        |
| 582 | Forced vital capacity (FVC), Best measure | genus.Eggerthella.id.819                 | Outlier-corrected | 0.00456931902570697  | 0.010565748 | 0.43246526   | 0.675580684 | rs3851328             | <0.001 |
| 583 | Forced vital capacity (FVC), Best measure | genus.Eisenbergiella.id.11304            | Raw               | 0.00747437019007545  | 0.00821677  | 0.909648165  | 0.38440868  |                       |        |
| 584 | Forced vital capacity (FVC), Best measure | genus.Eisenbergiella.id.11304            | Outlier-corrected |                      |             |              |             |                       | 0.125  |
| 585 | Forced vital capacity (FVC), Best measure | genus.Enterorhabdus.id.820               | Raw               | 0.000498246977636027 | 0.016015654 | 0.031109999  | 0.976385443 |                       |        |
| 586 | Forced vital capacity (FVC), Best measure | genus.Enterorhabdus.id.820               | Outlier-corrected | -0.0175354993934189  | 0.013649569 | -1.284692545 | 0.268250369 | rs73331712            | 0.023  |
| 587 | Forced vital capacity (FVC), Best measure | genus.Erysipelatoclostridium.id.11381    | Raw               | 0.00649974946416351  | 0.005968939 | 1.088928804  | 0.29457543  |                       |        |
| 588 | Forced vital capacity (FVC), Best measure | genus.Erysipelatoclostridium.id.11381    | Outlier-corrected |                      |             |              |             |                       | 0.775  |
| 589 | Forced vital capacity (FVC), Best measure | genus.ErysipelotrichaceaeUCG003.id.11384 | Raw               | -0.00413681075005362 | 0.009071511 | -0.456022238 | 0.654906609 |                       |        |
| 590 | Forced vital capacity (FVC), Best measure | genus.ErysipelotrichaceaeUCG003.id.11384 | Outlier-corrected |                      |             |              |             |                       | 0.227  |
| 591 | Forced vital capacity (FVC), Best measure | genus.Escherichia.Shigella.id.3504       | Raw               | 0.0221435988984267   | 0.009036342 | 2.450504607  | 0.036726304 |                       |        |
| 592 | Forced vital capacity (FVC), Best measure | genus.Escherichia.Shigella.id.3504       | Outlier-corrected |                      |             |              |             |                       | 0.592  |
| 593 | Forced vital capacity (FVC), Best measure | genus.Faecalibacterium.id.2057           | Raw               | -0.0261553614610477  | 0.015674433 | -1.668664013 | 0.133737204 |                       |        |
| 594 | Forced vital capacity (FVC), Best measure | genus.Faecalibacterium.id.2057           | Outlier-corrected | -0.019056254229895   | 0.013021958 | -1.463393958 | 0.186764517 | rs2835874             | 0.034  |
| 595 | Forced vital capacity (FVC), Best measure | genus.FamilyXIIID3011group.id.11293      | Raw               | 0.00601970335570272  | 0.00850401  | 0.70786643   | 0.495195596 |                       |        |
| 596 | Forced vital capacity (FVC), Best measure | genus.FamilyXIIID3011group.id.11293      | Outlier-corrected |                      |             |              |             |                       | 0.73   |
| 597 | Forced vital capacity (FVC), Best measure | genus.FamilyXIIICUG001.id.11294          | Raw               | -0.00723909919550687 | 0.016166323 | -0.447788844 | 0.667835367 |                       |        |
| 598 | Forced vital capacity (FVC), Best measure | genus.FamilyXIIICUG001.id.11294          | Outlier-corrected | 0.00580911079339586  | 0.009030346 | 0.6432877    | 0.543824722 | rs62414802            | 0.041  |
| 599 | Forced vital capacity (FVC), Best measure | genus.Flavonifractor.id.2059             | Raw               | -0.00144515865540724 | 0.024388975 | -0.059254589 | 0.955591536 |                       |        |
| 600 | Forced vital capacity (FVC), Best measure | genus.Flavonifractor.id.2059             | Outlier-corrected | 0.000182392401868763 | 0.010229176 | 0.017830606  | 0.98739286  | rs12030302,rs806808   | 0.02   |
| 601 | Forced vital capacity (FVC), Best measure | genus.Fusicatenibacter.id.11305          | Raw               | 0.00971383880680428  | 0.014858534 | 0.653754873  | 0.522015397 |                       |        |
| 602 | Forced vital capacity (FVC), Best measure | genus.Fusicatenibacter.id.11305          | Outlier-corrected | -0.00664064677974897 | 0.010613543 | -0.62567673  | 0.540930641 | rs62187631,rs73103914 | <0.001 |
| 603 | Forced vital capacity (FVC), Best measure | genus.Gordonibacter.id.821               | Raw               | -0.012080826828039   | 0.006844668 | -1.764998274 | 0.10802512  |                       |        |
| 604 | Forced vital capacity (FVC), Best measure | genus.Gordonibacter.id.821               | Outlier-corrected |                      |             |              |             |                       | 0.112  |
| 605 | Forced vital capacity (FVC), Best measure | genus.Haemophilus.id.3698                | Raw               | -0.00410238836422928 | 0.010152586 | -0.404073246 | 0.69674544  |                       |        |
| 606 | Forced vital capacity (FVC), Best measure | genus.Haemophilus.id.3698                | Outlier-corrected |                      |             |              |             |                       | 0.094  |
| 607 | Forced vital capacity (FVC), Best measure | genus.Holdemanela.id.11393               | Raw               | 0.0017748080154036   | 0.00734487  | 0.241639125  | 0.813942698 |                       |        |
| 608 | Forced vital capacity (FVC), Best measure | genus.Holdemanela.id.11393               | Outlier-corrected |                      |             |              |             |                       | 0.362  |
| 609 | Forced vital capacity (FVC), Best measure | genus.Holdemania.id.2157                 | Raw               | 0.00696628706528708  | 0.012018543 | 0.579628258  | 0.572074057 |                       |        |
| 610 | Forced vital capacity (FVC), Best measure | genus.Holdemania.id.2157                 | Outlier-corrected | 0.00686612082891296  | 0.009866362 | 0.695912095  | 0.500922952 | rs111745969,rs4146507 | <0.001 |
| 611 | Forced vital capacity (FVC), Best measure | genus.Howardella.id.2000                 | Raw               | -0.00244247113337638 | 0.009570518 | -0.25520784  | 0.804299003 |                       |        |
| 612 | Forced vital capacity (FVC), Best measure | genus.Howardella.id.2000                 | Outlier-corrected | 0.00413746055168002  | 0.007845802 | 0.527347055  | 0.612259888 | rs36081916            | 0.003  |

|     | A                                         | B                                          | C                 | D                     | E           | F            | G           | H                     | I     |
|-----|-------------------------------------------|--------------------------------------------|-------------------|-----------------------|-------------|--------------|-------------|-----------------------|-------|
| 613 | Forced vital capacity (FVC), Best measure | genus.Hungatella.id.11306                  | Raw               | 0.0079714480519822    | 0.006279175 | 1.26950556   | 0.273094615 |                       |       |
| 614 | Forced vital capacity (FVC), Best measure | genus.Hungatella.id.11306                  | Outlier-corrected |                       |             |              |             |                       | 0.715 |
| 615 | Forced vital capacity (FVC), Best measure | genus.Intestinibacter.id.11345             | Raw               | 0.0112993607213632    | 0.009258187 | 1.220472307  | 0.243962336 |                       |       |
| 616 | Forced vital capacity (FVC), Best measure | genus.Intestinibacter.id.11345             | Outlier-corrected |                       |             |              |             |                       | 0.272 |
| 617 | Forced vital capacity (FVC), Best measure | genus.Intestinimonas.id.2062               | Raw               | 0.000699470819858431  | 0.00823169  | 0.084972932  | 0.933406682 |                       |       |
| 618 | Forced vital capacity (FVC), Best measure | genus.Intestinimonas.id.2062               | Outlier-corrected |                       |             |              |             |                       | 0.2   |
| 619 | Forced vital capacity (FVC), Best measure | genus.Lachnodostridium.id.11308            | Raw               | -0.00458907295892479  | 0.017607845 | -0.260626604 | 0.798799076 |                       |       |
| 620 | Forced vital capacity (FVC), Best measure | genus.Lachnodostridium.id.11308            | Outlier-corrected | -0.00477978983136704  | 0.009799561 | -0.487755497 | 0.636239576 | rs12566975,rs72829893 | 0.003 |
| 621 | Forced vital capacity (FVC), Best measure | genus.Lachnospira.id.2004                  | Raw               | 0.00462615786233593   | 0.02063354  | 0.224205733  | 0.831470937 |                       |       |
| 622 | Forced vital capacity (FVC), Best measure | genus.Lachnospira.id.2004                  | Outlier-corrected |                       |             |              |             |                       | 0.108 |
| 623 | Forced vital capacity (FVC), Best measure | genus.LachnospiraceaeFCS020group.id.11314  | Raw               | -0.000222813898533094 | 0.011661614 | -0.019106609 | 0.985098226 |                       |       |
| 624 | Forced vital capacity (FVC), Best measure | genus.LachnospiraceaeFCS020group.id.11314  | Outlier-corrected |                       |             |              |             |                       | 0.072 |
| 625 | Forced vital capacity (FVC), Best measure | genus.LachnospiraceaeNC2004group.id.11316  | Raw               | 0.00739917371819416   | 0.010191787 | 0.725993755  | 0.488535255 |                       |       |
| 626 | Forced vital capacity (FVC), Best measure | genus.LachnospiraceaeNC2004group.id.11316  | Outlier-corrected |                       |             |              |             |                       | 0.089 |
| 627 | Forced vital capacity (FVC), Best measure | genus.LachnospiraceaeND3007group.id.11317  | dat<4SNP          | dat<4SNP              |             |              |             |                       |       |
| 628 | Forced vital capacity (FVC), Best measure | genus.LachnospiraceaeND3007group.id.11317  |                   |                       |             |              |             |                       |       |
| 629 | Forced vital capacity (FVC), Best measure | genus.LachnospiraceaeNK4A136group.id.11319 | Raw               | 0.00975291260624237   | 0.008876721 | 1.098706636  | 0.293451412 |                       |       |
| 630 | Forced vital capacity (FVC), Best measure | genus.LachnospiraceaeNK4A136group.id.11319 | Outlier-corrected |                       |             |              |             |                       | 0.444 |
| 631 | Forced vital capacity (FVC), Best measure | genus.LachnospiraceaeUCG001.id.11321       | Raw               | -0.0109189863599546   | 0.010766296 | -1.014182267 | 0.330508627 |                       |       |
| 632 | Forced vital capacity (FVC), Best measure | genus.LachnospiraceaeUCG001.id.11321       | Outlier-corrected | -0.017469175292734    | 0.008577521 | -2.036622914 | 0.066489288 | rs7341608             | 0.03  |
| 633 | Forced vital capacity (FVC), Best measure | genus.LachnospiraceaeUCG004.id.11324       | Raw               | 0.00209246627464285   | 0.01770048  | 0.118215225  | 0.908237991 |                       |       |
| 634 | Forced vital capacity (FVC), Best measure | genus.LachnospiraceaeUCG004.id.11324       | Outlier-corrected | -0.00782603859995074  | 0.016026827 | -0.488308681 | 0.637007837 | rs11128180            | 0.002 |
| 635 | Forced vital capacity (FVC), Best measure | genus.LachnospiraceaeUCG008.id.11328       | Raw               | 0.00346450770077422   | 0.006128576 | 0.565303825  | 0.585681304 |                       |       |
| 636 | Forced vital capacity (FVC), Best measure | genus.LachnospiraceaeUCG008.id.11328       | Outlier-corrected |                       |             |              |             |                       | 0.74  |
| 637 | Forced vital capacity (FVC), Best measure | genus.LachnospiraceaeUCG010.id.11330       | Raw               | 0.00628415666137871   | 0.011310965 | 0.555580943  | 0.592037596 |                       |       |
| 638 | Forced vital capacity (FVC), Best measure | genus.LachnospiraceaeUCG010.id.11330       | Outlier-corrected |                       |             |              |             |                       | 0.21  |
| 639 | Forced vital capacity (FVC), Best measure | genus.Lactobacillus.id.1837                | Raw               | -0.0133568734151658   | 0.010484585 | -1.273953413 | 0.249799881 |                       |       |
| 640 | Forced vital capacity (FVC), Best measure | genus.Lactobacillus.id.1837                | Outlier-corrected |                       |             |              |             |                       | 0.186 |
| 641 | Forced vital capacity (FVC), Best measure | genus.Lactococcus.id.1851                  | Raw               | -0.00469521728441692  | 0.007161064 | -0.655659196 | 0.530443082 |                       |       |
| 642 | Forced vital capacity (FVC), Best measure | genus.Lactococcus.id.1851                  | Outlier-corrected |                       |             |              |             |                       | 0.227 |
| 643 | Forced vital capacity (FVC), Best measure | genus.Marvinbryantia.id.2005               | Raw               | 0.0185786123170604    | 0.012541573 | 1.481362262  | 0.172649512 |                       |       |
| 644 | Forced vital capacity (FVC), Best measure | genus.Marvinbryantia.id.2005               | Outlier-corrected |                       |             |              |             |                       | 0.123 |
| 645 | Forced vital capacity (FVC), Best measure | genus.Methanobrevibacter.id.123            | Raw               | -0.00632836211776278  | 0.009515324 | -0.665070553 | 0.54239017  |                       |       |
| 646 | Forced vital capacity (FVC), Best measure | genus.Methanobrevibacter.id.123            | Outlier-corrected |                       |             |              |             |                       | 0.26  |
| 647 | Forced vital capacity (FVC), Best measure | genus.Odoribacter.id.952                   | Raw               | -0.00956051765971404  | 0.022989744 | -0.415860121 | 0.691976467 |                       |       |
| 648 | Forced vital capacity (FVC), Best measure | genus.Odoribacter.id.952                   | Outlier-corrected | -0.00970344117137379  | 0.018367632 | -0.528290255 | 0.625249581 | rs10423795,rs6856150  | 0.01  |
| 649 | Forced vital capacity (FVC), Best measure | genus.Olsenella.id.822                     | Raw               | -0.006393856945191    | 0.008680344 | -0.736590266 | 0.478295682 |                       |       |
| 650 | Forced vital capacity (FVC), Best measure | genus.Olsenella.id.822                     | Outlier-corrected | 0.00109917308085577   | 0.005212371 | 0.210877769  | 0.837679959 | rs62112538            | 0.004 |
| 651 | Forced vital capacity (FVC), Best measure | genus.Oscillibacter.id.2063                | Raw               | -0.00409362060636174  | 0.006316132 | -0.64812141  | 0.531505321 |                       |       |
| 652 | Forced vital capacity (FVC), Best measure | genus.Oscillibacter.id.2063                | Outlier-corrected |                       |             |              |             |                       | 0.762 |
| 653 | Forced vital capacity (FVC), Best measure | genus.Oscillospira.id.2064                 | Raw               | -0.0229043655837334   | 0.01430706  | -1.600913514 | 0.153429643 |                       |       |
| 654 | Forced vital capacity (FVC), Best measure | genus.Oscillospira.id.2064                 | Outlier-corrected |                       |             |              |             |                       | 0.053 |
| 655 | Forced vital capacity (FVC), Best measure | genus.Oxalobacter.id.2978                  | Raw               | 0.000381383420675511  | 0.008366339 | 0.045585464  | 0.964538137 |                       |       |
| 656 | Forced vital capacity (FVC), Best measure | genus.Oxalobacter.id.2978                  | Outlier-corrected | -0.00744716540059924  | 0.004830536 | -1.541685174 | 0.157540775 | rs4428215             | 0.019 |
| 657 | Forced vital capacity (FVC), Best measure | genus.Parabacteroides.id.954               | Raw               | 0.000921314762744828  | 0.019816058 | 0.046493342  | 0.964716885 |                       |       |
| 658 | Forced vital capacity (FVC), Best measure | genus.Parabacteroides.id.954               | Outlier-corrected |                       |             |              |             |                       | 0.1   |
| 659 | Forced vital capacity (FVC), Best measure | genus.Paraprevotella.id.962                | Raw               | 0.000957390585772924  | 0.00798393  | 0.119914706  | 0.90671285  |                       |       |
| 660 | Forced vital capacity (FVC), Best measure | genus.Paraprevotella.id.962                | Outlier-corrected |                       |             |              |             |                       | 0.169 |
| 661 | Forced vital capacity (FVC), Best measure | genus.Parasutterella.id.2892               | Raw               | -0.00479900117259814  | 0.009832523 | -0.488074231 | 0.633626049 |                       |       |
| 662 | Forced vital capacity (FVC), Best measure | genus.Parasutterella.id.2892               | Outlier-corrected |                       |             |              |             |                       | 0.106 |
| 663 | Forced vital capacity (FVC), Best measure | genus.Peptococcus.id.2037                  | Raw               | 0.00202037287709682   | 0.006364197 | 0.317459184  | 0.756839706 |                       |       |

|     | A                                         | B                                          | C                 | D                     | E            | F            | G           | H                     | I      |
|-----|-------------------------------------------|--------------------------------------------|-------------------|-----------------------|--------------|--------------|-------------|-----------------------|--------|
| 664 | Forced vital capacity (FVC), Best measure | genus.Peptococcus.id.2037                  | Outlier-corrected |                       |              |              |             |                       | 0.406  |
| 665 | Forced vital capacity (FVC), Best measure | genus.Phascolarctobacterium.id.2168        | Raw               | 0.0010148440641882    | 0.008490507  | 0.119526907  | 0.907483492 |                       |        |
| 666 | Forced vital capacity (FVC), Best measure | genus.Phascolarctobacterium.id.2168        | Outlier-corrected |                       |              |              |             |                       | 0.612  |
| 667 | Forced vital capacity (FVC), Best measure | genus.Prevotella7.id.11182                 | Raw               | -0.0001748165857402   | 0.008017604  | -0.021804094 | 0.983033167 |                       |        |
| 668 | Forced vital capacity (FVC), Best measure | genus.Prevotella7.id.11182                 | Outlier-corrected | 0.00453273694683587   | 0.007121881  | 0.636452227  | 0.540328715 | rs2240542             | 0.012  |
| 669 | Forced vital capacity (FVC), Best measure | genus.Prevotella9.id.11183                 | Raw               | 0.00205178402219475   | 0.013838219  | 0.148269365  | 0.884405339 |                       |        |
| 670 | Forced vital capacity (FVC), Best measure | genus.Prevotella9.id.11183                 | Outlier-corrected | 0.0029802309361214    | 0.012176111  | 0.244760501  | 0.811147717 | rs7237249,rs746764    | <0.001 |
| 671 | Forced vital capacity (FVC), Best measure | genus.RikenellaceaeRC9gutgroup.id.11191    | Raw               | -0.00111438278160886  | 0.007186859  | -0.15505838  | 0.879860383 |                       |        |
| 672 | Forced vital capacity (FVC), Best measure | genus.RikenellaceaeRC9gutgroup.id.11191    | Outlier-corrected | 0.00310317429774935   | 0.006168494  | 0.503068403  | 0.626996595 | rs2074881             | 0.039  |
| 673 | Forced vital capacity (FVC), Best measure | genus.Romboutsia.id.11347                  | Raw               | -0.000895347873903585 | 0.008607587  | -0.104018458 | 0.918872981 |                       |        |
| 674 | Forced vital capacity (FVC), Best measure | genus.Romboutsia.id.11347                  | Outlier-corrected |                       |              |              |             |                       | 0.483  |
| 675 | Forced vital capacity (FVC), Best measure | genus.Roseburia.id.2012                    | Raw               | -0.0058665745695622   | 0.013032145  | -0.450161859 | 0.660618208 |                       |        |
| 676 | Forced vital capacity (FVC), Best measure | genus.Roseburia.id.2012                    | Outlier-corrected |                       |              |              |             |                       | 0.083  |
| 677 | Forced vital capacity (FVC), Best measure | genus.Ruminiclostridium5.id.11355          | Raw               | -0.0272868719475249   | 0.010759011  | -2.536187726 | 0.031909754 |                       |        |
| 678 | Forced vital capacity (FVC), Best measure | genus.Ruminiclostridium5.id.11355          | Outlier-corrected |                       |              |              |             |                       | 0.678  |
| 679 | Forced vital capacity (FVC), Best measure | genus.Ruminiclostridium6.id.11356          | Raw               | -0.00863064736453664  | 0.008796566  | -0.981138204 | 0.343176616 |                       |        |
| 680 | Forced vital capacity (FVC), Best measure | genus.Ruminiclostridium6.id.11356          | Outlier-corrected |                       |              |              |             |                       | 0.192  |
| 681 | Forced vital capacity (FVC), Best measure | genus.Ruminiclostridium9.id.11357          | Raw               | 0.0104464491161697    | 0.019340334  | 0.540137978  | 0.603808663 |                       |        |
| 682 | Forced vital capacity (FVC), Best measure | genus.Ruminiclostridium9.id.11357          | Outlier-corrected |                       |              |              |             | NA                    | 0.023  |
| 683 | Forced vital capacity (FVC), Best measure | genus.RuminococcaceaeNK4A214group.id.11358 | Raw               | 0.00771549024334465   | 0.013486002  | 0.5721111017 | 0.577807371 |                       |        |
| 684 | Forced vital capacity (FVC), Best measure | genus.RuminococcaceaeNK4A214group.id.11358 | Outlier-corrected |                       |              |              |             | NA                    | 0.031  |
| 685 | Forced vital capacity (FVC), Best measure | genus.RuminococcaceaeUCG002.id.11360       | Raw               | -0.0039492510401379   | 0.007438639  | -0.530910449 | 0.601632367 |                       |        |
| 686 | Forced vital capacity (FVC), Best measure | genus.RuminococcaceaeUCG002.id.11360       | Outlier-corrected |                       |              |              |             |                       | 0.525  |
| 687 | Forced vital capacity (FVC), Best measure | genus.RuminococcaceaeUCG003.id.11361       | Raw               | 0.0132420879463381    | 0.013548713  | 0.977368706  | 0.349392103 |                       |        |
| 688 | Forced vital capacity (FVC), Best measure | genus.RuminococcaceaeUCG003.id.11361       | Outlier-corrected | 0.0114062789406262    | 0.007534144  | 1.513944987  | 0.164337235 | rs2523124,rs4532474   | 0.035  |
| 689 | Forced vital capacity (FVC), Best measure | genus.RuminococcaceaeUCG004.id.11362       | Raw               | -0.000391351346205854 | 0.0151112627 | -0.025895653 | 0.97997487  |                       |        |
| 690 | Forced vital capacity (FVC), Best measure | genus.RuminococcaceaeUCG004.id.11362       | Outlier-corrected | -0.00466227597080507  | 0.010743066  | -0.433980012 | 0.679473619 | rs10976229,rs12125734 | 0.011  |
| 691 | Forced vital capacity (FVC), Best measure | genus.RuminococcaceaeUCG005.id.11363       | Raw               | -0.0101464718013987   | 0.01082946   | -0.936932375 | 0.36587398  |                       |        |
| 692 | Forced vital capacity (FVC), Best measure | genus.RuminococcaceaeUCG005.id.11363       | Outlier-corrected |                       |              |              |             |                       | 0.145  |
| 693 | Forced vital capacity (FVC), Best measure | genus.RuminococcaceaeUCG009.id.11366       | Raw               | -0.00367275149134535  | 0.008320826  | -0.441392667 | 0.667479398 |                       |        |
| 694 | Forced vital capacity (FVC), Best measure | genus.RuminococcaceaeUCG009.id.11366       | Outlier-corrected |                       |              |              |             |                       | 0.253  |
| 695 | Forced vital capacity (FVC), Best measure | genus.RuminococcaceaeUCG010.id.11367       | Raw               | 0.0247972245637758    | 0.004293709  | 5.775245213  | 0.002188605 |                       |        |
| 696 | Forced vital capacity (FVC), Best measure | genus.RuminococcaceaeUCG010.id.11367       | Outlier-corrected |                       |              |              |             |                       | 0.994  |
| 697 | Forced vital capacity (FVC), Best measure | genus.RuminococcaceaeUCG011.id.11368       | Raw               | 0.00259488281104123   | 0.011255804  | 0.230537318  | 0.825333733 |                       |        |
| 698 | Forced vital capacity (FVC), Best measure | genus.RuminococcaceaeUCG011.id.11368       | Outlier-corrected | 0.0101151703090856    | 0.009369937  | 1.079534547  | 0.329649314 | rs10274562            | 0.014  |
| 699 | Forced vital capacity (FVC), Best measure | genus.RuminococcaceaeUCG013.id.11370       | Raw               | -0.0056742636835669   | 0.018511469  | -0.306526927 | 0.764927569 |                       |        |
| 700 | Forced vital capacity (FVC), Best measure | genus.RuminococcaceaeUCG013.id.11370       | Outlier-corrected | -0.00319037145282436  | 0.012360038  | -0.258119879 | 0.802119982 | rs11581881,rs12485353 | <0.001 |
| 701 | Forced vital capacity (FVC), Best measure | genus.RuminococcaceaeUCG014.id.11371       | Raw               | 0.00454606136622743   | 0.010345967  | 0.439404191  | 0.669711956 |                       |        |
| 702 | Forced vital capacity (FVC), Best measure | genus.RuminococcaceaeUCG014.id.11371       | Outlier-corrected |                       |              |              |             |                       | 0.368  |
| 703 | Forced vital capacity (FVC), Best measure | genus.Ruminococcus1.id.11373               | Raw               | 0.0129301778978221    | 0.012093979  | 1.069141788  | 0.312840894 |                       |        |
| 704 | Forced vital capacity (FVC), Best measure | genus.Ruminococcus1.id.11373               | Outlier-corrected |                       |              |              |             |                       | 0.293  |
| 705 | Forced vital capacity (FVC), Best measure | genus.Ruminococcus2.id.11374               | Raw               | -0.00408796680439877  | 0.00708654   | -0.576863563 | 0.573885564 |                       |        |
| 706 | Forced vital capacity (FVC), Best measure | genus.Ruminococcus2.id.11374               | Outlier-corrected |                       |              |              |             |                       | 0.851  |
| 707 | Forced vital capacity (FVC), Best measure | genus.Sellimonas.id.14369                  | Raw               | -0.00541650432590972  | 0.007970861  | -0.67953814  | 0.518628804 |                       |        |
| 708 | Forced vital capacity (FVC), Best measure | genus.Sellimonas.id.14369                  | Outlier-corrected |                       |              |              |             |                       | 0.07   |
| 709 | Forced vital capacity (FVC), Best measure | genus.Senegalimassilia.id.11160            | Raw               | -0.0326743061168253   | 0.016220607  | -2.014370174 | 0.114228299 |                       |        |
| 710 | Forced vital capacity (FVC), Best measure | genus.Senegalimassilia.id.11160            | Outlier-corrected |                       |              |              |             |                       | 0.1    |
| 711 | Forced vital capacity (FVC), Best measure | genus.Slackia.id.825                       | Raw               | 0.00353676507732988   | 0.008214659  | 0.430543145  | 0.684727928 |                       |        |
| 712 | Forced vital capacity (FVC), Best measure | genus.Slackia.id.825                       | Outlier-corrected |                       |              |              |             |                       | 0.611  |
| 713 | Forced vital capacity (FVC), Best measure | genus.Streptococcus.id.1853                | Raw               | 0.0028591938430167    | 0.0149529    | 0.191213334  | 0.851312523 |                       |        |
| 714 | Forced vital capacity (FVC), Best measure | genus.Streptococcus.id.1853                | Outlier-corrected |                       |              |              |             | NA                    | 0.005  |

|     | A                                         | B                                 | C                 | D                     | E           | F            | G           | H                    | I      |
|-----|-------------------------------------------|-----------------------------------|-------------------|-----------------------|-------------|--------------|-------------|----------------------|--------|
| 715 | Forced vital capacity (FVC), Best measure | genus.Subdoligranulum.id.2070     | Raw               | 0.0013171035596536    | 0.013819975 | 0.095304339  | 0.926161361 |                      |        |
| 716 | Forced vital capacity (FVC), Best measure | genus.Subdoligranulum.id.2070     | Outlier-corrected |                       |             |              |             |                      | 0.188  |
| 717 | Forced vital capacity (FVC), Best measure | genus.Sutterella.id.2896          | Raw               | -0.00583594074360474  | 0.017174065 | -0.339811273 | 0.740398506 |                      |        |
| 718 | Forced vital capacity (FVC), Best measure | genus.Sutterella.id.2896          | Outlier-corrected | -0.00490197202267967  | 0.011376135 | -0.430899598 | 0.676677406 | rs7638039,rs9350083  | 0.001  |
| 719 | Forced vital capacity (FVC), Best measure | genus.Terrisporobacter.id.11348   | Raw               | -0.0102966505343475   | 0.010755223 | -0.957362849 | 0.39259852  |                      |        |
| 720 | Forced vital capacity (FVC), Best measure | genus.Terrisporobacter.id.11348   | Outlier-corrected |                       |             |              |             |                      | 0.394  |
| 721 | Forced vital capacity (FVC), Best measure | genus.Turicibacter.id.2162        | Raw               | 0.0256055701379785    | 0.008192695 | 3.125414917  | 0.012211586 |                      |        |
| 722 | Forced vital capacity (FVC), Best measure | genus.Turicibacter.id.2162        | Outlier-corrected |                       |             |              |             |                      | 0.531  |
| 723 | Forced vital capacity (FVC), Best measure | genus.TyzzereIIa3.id.11335        | Raw               | 0.0016353142558763    | 0.00530029  | 0.308532974  | 0.763441236 |                      |        |
| 724 | Forced vital capacity (FVC), Best measure | genus.TyzzereIIa3.id.11335        | Outlier-corrected |                       |             |              |             |                      | 0.592  |
| 725 | Forced vital capacity (FVC), Best measure | genus.Veillonella.id.2198         | Raw               | 0.0286174402165898    | 0.015659642 | 1.827464544  | 0.110354739 |                      |        |
| 726 | Forced vital capacity (FVC), Best measure | genus.Veillonella.id.2198         | Outlier-corrected | 0.0266099566561212    | 0.005342393 | 4.98090575   | 0.004172475 | rs1882878,rs742016   | 0.014  |
| 727 | Forced vital capacity (FVC), Best measure | genus.Victivallis.id.2256         | Raw               | -0.001407475677852    | 0.006717256 | -0.209531333 | 0.83869961  |                      |        |
| 728 | Forced vital capacity (FVC), Best measure | genus.Victivallis.id.2256         | Outlier-corrected |                       |             |              |             |                      | 0.105  |
| 729 | Forced vital capacity (FVC), Best measure | order.Actinomycetales.id.420      | Raw               | -0.0109947135662223   | 0.00713818  | -1.540268402 | 0.198339501 |                      |        |
| 730 | Forced vital capacity (FVC), Best measure | order.Actinomycetales.id.420      | Outlier-corrected |                       |             |              |             |                      | 0.787  |
| 731 | Forced vital capacity (FVC), Best measure | order.Bacillales.id.1674          | Raw               | 0.0127666215884875    | 0.008462361 | 1.508635811  | 0.175129901 |                      |        |
| 732 | Forced vital capacity (FVC), Best measure | order.Bacillales.id.1674          | Outlier-corrected |                       |             |              |             |                      | 0.071  |
| 733 | Forced vital capacity (FVC), Best measure | order.Bacteroidales.id.913        | Raw               | -0.0214056604584015   | 0.016112735 | -1.328493299 | 0.213534194 |                      |        |
| 734 | Forced vital capacity (FVC), Best measure | order.Bacteroidales.id.913        | Outlier-corrected |                       |             |              |             |                      | 0.096  |
| 735 | Forced vital capacity (FVC), Best measure | order.Bifidobacteriales.id.432    | Raw               | -0.0207167651517699   | 0.015289896 | -1.354931731 | 0.208468753 |                      |        |
| 736 | Forced vital capacity (FVC), Best measure | order.Bifidobacteriales.id.432    | Outlier-corrected |                       |             |              |             |                      | 0.096  |
| 737 | Forced vital capacity (FVC), Best measure | order.Burkholderiales.id.2874     | Raw               | 0.0256892709680424    | 0.019773206 | 1.299196028  | 0.226170418 |                      |        |
| 738 | Forced vital capacity (FVC), Best measure | order.Burkholderiales.id.2874     | Outlier-corrected | 0.0298602425212808    | 0.014631998 | 2.040749433  | 0.080623657 | rs6087811,rs7638039  | 0.007  |
| 739 | Forced vital capacity (FVC), Best measure | order.Clostridiales.id.1863       | Raw               | 0.030080866368164     | 0.012957767 | 2.321454504  | 0.038665109 |                      |        |
| 740 | Forced vital capacity (FVC), Best measure | order.Clostridiales.id.1863       | Outlier-corrected |                       |             |              |             |                      | 0.179  |
| 741 | Forced vital capacity (FVC), Best measure | order.Coriobacteriales.id.810     | Raw               | -0.00974687913717225  | 0.017022204 | -0.572597964 | 0.576686458 |                      |        |
| 742 | Forced vital capacity (FVC), Best measure | order.Coriobacteriales.id.810     | Outlier-corrected | -0.01067967077102     | 0.01408229  | -0.758375974 | 0.464165007 | rs2442778,rs34739816 | <0.001 |
| 743 | Forced vital capacity (FVC), Best measure | order.Desulfovibrionales.id.3156  | Raw               | 0.0319773607944232    | 0.009929426 | 3.220464286  | 0.008152332 |                      |        |
| 744 | Forced vital capacity (FVC), Best measure | order.Desulfovibrionales.id.3156  | Outlier-corrected |                       |             |              |             |                      | 0.423  |
| 745 | Forced vital capacity (FVC), Best measure | order.Enterobacteriales.id.3468   | Raw               | 0.00526755401172004   | 0.013606926 | 0.387122999  | 0.712023858 |                      |        |
| 746 | Forced vital capacity (FVC), Best measure | order.Enterobacteriales.id.3468   | Outlier-corrected |                       |             |              |             |                      | 0.351  |
| 747 | Forced vital capacity (FVC), Best measure | order.Erysipelotrichales.id.2148  | Raw               | 0.0268924543331671    | 0.009815311 | 2.739847294  | 0.017936426 |                      |        |
| 748 | Forced vital capacity (FVC), Best measure | order.Erysipelotrichales.id.2148  | Outlier-corrected |                       |             |              |             |                      | 0.642  |
| 749 | Forced vital capacity (FVC), Best measure | order.Gastranaerophilales.id.1591 | Raw               | -0.000872947326254439 | 0.012205863 | -0.071518689 | 0.944740577 |                      |        |
| 750 | Forced vital capacity (FVC), Best measure | order.Gastranaerophilales.id.1591 | Outlier-corrected | -0.0063433380098022   | 0.007243309 | -0.875751351 | 0.414844879 | rs79790072,rs8028558 | 0.004  |
| 751 | Forced vital capacity (FVC), Best measure | order.Lactobacillales.id.1800     | Raw               | -0.0114884533652678   | 0.010451125 | -1.099255169 | 0.291597703 |                      |        |
| 752 | Forced vital capacity (FVC), Best measure | order.Lactobacillales.id.1800     | Outlier-corrected |                       |             |              |             |                      | 0.251  |
| 753 | Forced vital capacity (FVC), Best measure | order.Methanobacteriales.id.120   | Raw               | 0.00458112153052943   | 0.005459476 | 0.839113746  | 0.429127116 |                      |        |
| 754 | Forced vital capacity (FVC), Best measure | order.Methanobacteriales.id.120   | Outlier-corrected |                       |             |              |             |                      | 0.6    |
| 755 | Forced vital capacity (FVC), Best measure | order.MollicutesRF9.id.11579      | Raw               | 0.00761776051179839   | 0.010718112 | 0.710737138  | 0.490830861 |                      |        |
| 756 | Forced vital capacity (FVC), Best measure | order.MollicutesRF9.id.11579      | Outlier-corrected |                       |             |              |             | NA                   | 0.044  |
| 757 | Forced vital capacity (FVC), Best measure | order.NB1n.id.3953                | Raw               | 0.000576460420867     | 0.008124013 | 0.070957594  | 0.944600365 |                      |        |
| 758 | Forced vital capacity (FVC), Best measure | order.NB1n.id.3953                | Outlier-corrected |                       |             |              |             | NA                   | 0.019  |
| 759 | Forced vital capacity (FVC), Best measure | order.Pasteurellales.id.3688      | Raw               | 0.0137529794779012    | 0.008689343 | 1.582741026  | 0.137495623 |                      |        |
| 760 | Forced vital capacity (FVC), Best measure | order.Pasteurellales.id.3688      | Outlier-corrected |                       |             |              |             | NA                   | 0.039  |
| 761 | Forced vital capacity (FVC), Best measure | order.Rhodospirillales.id.2667    | Raw               | 0.000350987702402562  | 0.008405238 | 0.041758213  | 0.967378206 |                      |        |
| 762 | Forced vital capacity (FVC), Best measure | order.Rhodospirillales.id.2667    | Outlier-corrected |                       |             |              |             |                      | 0.238  |
| 763 | Forced vital capacity (FVC), Best measure | order.Selenomonadales.id.2165     | Raw               | -0.0125851758871243   | 0.00979077  | -1.28541232  | 0.227618448 |                      |        |
| 764 | Forced vital capacity (FVC), Best measure | order.Selenomonadales.id.2165     | Outlier-corrected |                       |             |              |             |                      | 0.633  |
| 765 | Forced vital capacity (FVC), Best measure | order.Verrucomicrobiales.id.4030  | Raw               | 0.0144880476853596    | 0.014617858 | 0.991119721  | 0.345002666 |                      |        |

|     | A                                                                 | B                                 | C                 | D                    | E           | F            | G           | H                     | I     |
|-----|-------------------------------------------------------------------|-----------------------------------|-------------------|----------------------|-------------|--------------|-------------|-----------------------|-------|
| 766 | Forced vital capacity (FVC), Best measure                         | order.Verrucomicrobiales.id.4030  | Outlier-corrected | 0.00988604691401392  | 0.009867683 | 1.001861009  | 0.345747136 | rs12908520,rs74542928 | 0.004 |
| 767 | Forced vital capacity (FVC), Best measure                         | order.Victivallales.id.2254       | Raw               | -0.00450730174026118 | 0.008710657 | -0.517446797 | 0.620789284 |                       |       |
| 768 | Forced vital capacity (FVC), Best measure                         | order.Victivallales.id.2254       | Outlier-corrected |                      |             |              |             |                       | 0.125 |
| 769 | Forced vital capacity (FVC), Best measure                         | phylum.Actinobacteria.id.400      | Raw               | -0.00112525342633337 | 0.015152425 | -0.074262266 | 0.941932255 |                       |       |
| 770 | Forced vital capacity (FVC), Best measure                         | phylum.Actinobacteria.id.400      | Outlier-corrected | -0.0100811893564346  | 0.012722571 | -0.792386152 | 0.44351904  | rs11766971            | 0.01  |
| 771 | Forced vital capacity (FVC), Best measure                         | phylum.Bacteroidetes.id.905       | Raw               | -0.015735054288518   | 0.016952218 | -0.928200344 | 0.380456413 |                       |       |
| 772 | Forced vital capacity (FVC), Best measure                         | phylum.Bacteroidetes.id.905       | Outlier-corrected |                      |             |              |             |                       | 0.148 |
| 773 | Forced vital capacity (FVC), Best measure                         | phylum.Cyanobacteria.id.1500      | Raw               | 0.0131930028700412   | 0.011643153 | 1.133112514  | 0.294480311 |                       |       |
| 774 | Forced vital capacity (FVC), Best measure                         | phylum.Cyanobacteria.id.1500      | Outlier-corrected |                      |             |              |             |                       | 0.071 |
| 775 | Forced vital capacity (FVC), Best measure                         | phylum.Euryarchaeota.id.55        | Raw               | 0.00130361864193452  | 0.004757416 | 0.274018242  | 0.789647486 |                       |       |
| 776 | Forced vital capacity (FVC), Best measure                         | phylum.Euryarchaeota.id.55        | Outlier-corrected |                      |             |              |             |                       | 0.655 |
| 777 | Forced vital capacity (FVC), Best measure                         | phylum.Firmicutes.id.1672         | Raw               | -0.0116239501244749  | 0.014696214 | -0.790948604 | 0.441301377 |                       |       |
| 778 | Forced vital capacity (FVC), Best measure                         | phylum.Firmicutes.id.1672         | Outlier-corrected | -0.0118873254980133  | 0.011360669 | -1.046357852 | 0.314461967 | rs2332027,rs6814436   | 0.001 |
| 779 | Forced vital capacity (FVC), Best measure                         | phylum.Lentisphaerae.id.2238      | Raw               | -0.00502665312334211 | 0.007788452 | -0.64539822  | 0.536735994 |                       |       |
| 780 | Forced vital capacity (FVC), Best measure                         | phylum.Lentisphaerae.id.2238      | Outlier-corrected |                      |             |              |             |                       | 0.167 |
| 781 | Forced vital capacity (FVC), Best measure                         | phylum.Proteobacteria.id.2375     | Raw               | 0.0158596433117235   | 0.014888128 | 1.065254388  | 0.311805248 |                       |       |
| 782 | Forced vital capacity (FVC), Best measure                         | phylum.Proteobacteria.id.2375     | Outlier-corrected |                      |             |              |             |                       | 0.076 |
| 783 | Forced vital capacity (FVC), Best measure                         | phylum.Tenericutes.id.3919        | Raw               | 0.00822132430961007  | 0.012128625 | 0.677844685  | 0.511876196 |                       |       |
| 784 | Forced vital capacity (FVC), Best measure                         | phylum.Tenericutes.id.3919        | Outlier-corrected |                      |             |              |             | NA                    | 0.032 |
| 785 | Forced vital capacity (FVC), Best measure                         | phylum.Verrucomicrobia.id.3982    | Raw               | 0.022863651796684    | 0.015857133 | 1.441852781  | 0.177203017 |                       |       |
| 786 | Forced vital capacity (FVC), Best measure                         | phylum.Verrucomicrobia.id.3982    | Outlier-corrected | 0.0196366215467646   | 0.013832167 | 1.419634494  | 0.189409989 | rs12908520,rs74542928 | 0.001 |
| 787 | Forced expiratory volume in 1-second (FEV1), predicted percentage | class.Actinobacteria.id.419       | Raw               | -0.00371650552164653 | 0.033365743 | -0.111386865 | 0.913150983 |                       |       |
| 788 | Forced expiratory volume in 1-second (FEV1), predicted percentage | class.Actinobacteria.id.419       | Outlier-corrected | -0.0210827637873979  | 0.029716449 | -0.709464447 | 0.492800683 | rs12049045            | 0.005 |
| 789 | Forced expiratory volume in 1-second (FEV1), predicted percentage | class.Alphaproteobacteria.id.2379 | Raw               | 0.0201746891576638   | 0.033891752 | 0.595268405  | 0.573414554 |                       |       |
| 790 | Forced expiratory volume in 1-second (FEV1), predicted percentage | class.Alphaproteobacteria.id.2379 | Outlier-corrected |                      |             |              |             |                       | 0.059 |
| 791 | Forced expiratory volume in 1-second (FEV1), predicted percentage | class.Bacilli.id.1673             | Raw               | -0.0113951708047189  | 0.013584133 | -0.838858889 | 0.413906252 |                       |       |
| 792 | Forced expiratory volume in 1-second (FEV1), predicted percentage | class.Bacilli.id.1673             | Outlier-corrected |                      |             |              |             |                       | 0.923 |
| 793 | Forced expiratory volume in 1-second (FEV1), predicted percentage | class.Bacteroidia.id.912          | Raw               | -0.0181546331674098  | 0.028004291 | -0.648280415 | 0.531406647 |                       |       |
| 794 | Forced expiratory volume in 1-second (FEV1), predicted percentage | class.Bacteroidia.id.912          | Outlier-corrected |                      |             |              |             |                       | 0.364 |
| 795 | Forced expiratory volume in 1-second (FEV1), predicted percentage | class.Betaproteobacteria.id.2867  | Raw               | 0.0335647035552664   | 0.029969399 | 1.119965843  | 0.28658614  |                       |       |
| 796 | Forced expiratory volume in 1-second (FEV1), predicted percentage | class.Betaproteobacteria.id.2867  | Outlier-corrected |                      |             |              |             |                       | 0.099 |
| 797 | Forced expiratory volume in 1-second (FEV1), predicted percentage | class.Clostridia.id.1859          | Raw               | 0.0527891753426846   | 0.02755071  | 1.916073119  | 0.081695185 |                       |       |
| 798 | Forced expiratory volume in 1-second (FEV1), predicted percentage | class.Clostridia.id.1859          | Outlier-corrected |                      |             |              |             |                       | 0.304 |
| 799 | Forced expiratory volume in 1-second (FEV1), predicted percentage | class.Coriobacteriia.id.809       | Raw               | -0.00993048696771055 | 0.027303121 | -0.363712527 | 0.721919288 |                       |       |
| 800 | Forced expiratory volume in 1-second (FEV1), predicted percentage | class.Coriobacteriia.id.809       | Outlier-corrected |                      |             |              |             |                       | 0.115 |
| 801 | Forced expiratory volume in 1-second (FEV1), predicted percentage | class.Deltaproteobacteria.id.3087 | Raw               | 0.047621194337988    | 0.025806102 | 1.845346261  | 0.089794695 |                       |       |
| 802 | Forced expiratory volume in 1-second (FEV1), predicted percentage | class.Deltaproteobacteria.id.3087 | Outlier-corrected |                      |             |              |             |                       | 0.1   |
| 803 | Forced expiratory volume in 1-second (FEV1), predicted percentage | class.Erysipelotrichia.id.2147    | Raw               | 0.0312715752958063   | 0.020918306 | 1.494938249  | 0.160756442 |                       |       |
| 804 | Forced expiratory volume in 1-second (FEV1), predicted percentage | class.Erysipelotrichia.id.2147    | Outlier-corrected |                      |             |              |             |                       | 0.618 |
| 805 | Forced expiratory volume in 1-second (FEV1), predicted percentage | class.Gammaproteobacteria.id.3303 | Raw               | 0.0700870931763133   | 0.024541385 | 2.855873548  | 0.028957817 |                       |       |
| 806 | Forced expiratory volume in 1-second (FEV1), predicted percentage | class.Gammaproteobacteria.id.3303 | Outlier-corrected |                      |             |              |             |                       | 0.665 |
| 807 | Forced expiratory volume in 1-second (FEV1), predicted percentage | class.Lentisphaeria.id.2250       | Raw               | -0.0147450016119527  | 0.017938827 | -0.82196019  | 0.438196307 |                       |       |
| 808 | Forced expiratory volume in 1-second (FEV1), predicted percentage | class.Lentisphaeria.id.2250       | Outlier-corrected |                      |             |              |             |                       | 0.163 |
| 809 | Forced expiratory volume in 1-second (FEV1), predicted percentage | class.Melainabacteria.id.1589     | Raw               | 0.00242077225817471  | 0.011745891 | 0.206095236  | 0.841303192 |                       |       |
| 810 | Forced expiratory volume in 1-second (FEV1), predicted percentage | class.Melainabacteria.id.1589     | Outlier-corrected |                      |             |              |             |                       | 0.754 |
| 811 | Forced expiratory volume in 1-second (FEV1), predicted percentage | class.Methanobacteria.id.119      | Raw               | 0.000510766671729285 | 0.017303609 | 0.029517928  | 0.977275472 |                       |       |
| 812 | Forced expiratory volume in 1-second (FEV1), predicted percentage | class.Methanobacteria.id.119      | Outlier-corrected |                      |             |              |             |                       | 0.108 |
| 813 | Forced expiratory volume in 1-second (FEV1), predicted percentage | class.Mollicutes.id.3920          | Raw               | 0.00716369481439416  | 0.027148608 | 0.263869695  | 0.796758311 |                       |       |
| 814 | Forced expiratory volume in 1-second (FEV1), predicted percentage | class.Mollicutes.id.3920          | Outlier-corrected | -0.00595117343756663 | 0.023804116 | -0.25000607  | 0.807643641 | rs12566890            | 0.024 |
| 815 | Forced expiratory volume in 1-second (FEV1), predicted percentage | class.Negativicutes.id.2164       | Raw               | -0.0733937755213658  | 0.027180009 | -2.700285201 | 0.022302444 |                       |       |
| 816 | Forced expiratory volume in 1-second (FEV1), predicted percentage | class.Negativicutes.id.2164       | Outlier-corrected |                      |             |              |             |                       | 0.26  |

|     | A                                                                 | B                                           | C                 | D                     | E           | F            | G           | H           | I     |
|-----|-------------------------------------------------------------------|---------------------------------------------|-------------------|-----------------------|-------------|--------------|-------------|-------------|-------|
| 817 | Forced expiratory volume in 1-second (FEV1), predicted percentage | class.Verrucomicrobiae.id.4029              | Raw               | 0.0265899529285025    | 0.022411219 | 1.186457246  | 0.262864485 |             |       |
| 818 | Forced expiratory volume in 1-second (FEV1), predicted percentage | class.Verrucomicrobiae.id.4029              | Outlier-corrected |                       |             |              |             |             | 0.207 |
| 819 | Forced expiratory volume in 1-second (FEV1), predicted percentage | family.Acidaminococcaceae.id.2166           | Raw               | 0.0282564276400293    | 0.035517491 | 0.795563736  | 0.456596503 |             |       |
| 820 | Forced expiratory volume in 1-second (FEV1), predicted percentage | family.Acidaminococcaceae.id.2166           | Outlier-corrected |                       |             |              |             |             | 0.066 |
| 821 | Forced expiratory volume in 1-second (FEV1), predicted percentage | family.Actinomycetaceae.id.421              | Raw               | -0.0337305310307232   | 0.026637876 | -1.266262013 | 0.274140064 |             |       |
| 822 | Forced expiratory volume in 1-second (FEV1), predicted percentage | family.Actinomycetaceae.id.421              | Outlier-corrected |                       |             |              |             |             | 0.264 |
| 823 | Forced expiratory volume in 1-second (FEV1), predicted percentage | family.Alcaligenaceae.id.2875               | Raw               | 0.0599542703681596    | 0.034417364 | 1.741977381  | 0.115491722 |             |       |
| 824 | Forced expiratory volume in 1-second (FEV1), predicted percentage | family.Alcaligenaceae.id.2875               | Outlier-corrected |                       |             |              |             |             | 0.069 |
| 825 | Forced expiratory volume in 1-second (FEV1), predicted percentage | family.Bacteroidaceae.id.917                | Raw               | -0.0265704896840105   | 0.015152608 | -1.753525833 | 0.117600169 |             |       |
| 826 | Forced expiratory volume in 1-second (FEV1), predicted percentage | family.Bacteroidaceae.id.917                | Outlier-corrected |                       |             |              |             |             | 0.958 |
| 827 | Forced expiratory volume in 1-second (FEV1), predicted percentage | family.BacteroidalesS24.7group.id.11173     | Raw               | 0.00962175783218669   | 0.020767179 | 0.463315587  | 0.657198717 |             |       |
| 828 | Forced expiratory volume in 1-second (FEV1), predicted percentage | family.BacteroidalesS24.7group.id.11173     | Outlier-corrected |                       |             |              |             |             | 0.29  |
| 829 | Forced expiratory volume in 1-second (FEV1), predicted percentage | family.Bifidobacteriaceae.id.433            | Raw               | -0.0641356275559193   | 0.025494978 | -2.515618096 | 0.033005101 |             |       |
| 830 | Forced expiratory volume in 1-second (FEV1), predicted percentage | family.Bifidobacteriaceae.id.433            | Outlier-corrected |                       |             |              |             |             | 0.433 |
| 831 | Forced expiratory volume in 1-second (FEV1), predicted percentage | family.Christensenellaceae.id.1866          | Raw               | -0.00619855578294027  | 0.022879227 | -0.270925054 | 0.791958695 |             |       |
| 832 | Forced expiratory volume in 1-second (FEV1), predicted percentage | family.Christensenellaceae.id.1866          | Outlier-corrected |                       |             |              |             |             | 0.364 |
| 833 | Forced expiratory volume in 1-second (FEV1), predicted percentage | family.Clostridiaceae1.id.1869              | Raw               | 0.00124755998870356   | 0.024797812 | 0.050309276  | 0.96097478  |             |       |
| 834 | Forced expiratory volume in 1-second (FEV1), predicted percentage | family.Clostridiaceae1.id.1869              | Outlier-corrected |                       |             |              |             |             | 0.279 |
| 835 | Forced expiratory volume in 1-second (FEV1), predicted percentage | family.ClostridialesvadinBB60group.id.11286 | Raw               | -0.0104379601542504   | 0.020325897 | -0.513530116 | 0.616196582 |             |       |
| 836 | Forced expiratory volume in 1-second (FEV1), predicted percentage | family.ClostridialesvadinBB60group.id.11286 | Outlier-corrected |                       |             |              |             |             | 0.144 |
| 837 | Forced expiratory volume in 1-second (FEV1), predicted percentage | family.Coriobacteriaceae.id.811             | Raw               | -0.00993048696771055  | 0.027303121 | -0.363712527 | 0.721919288 |             |       |
| 838 | Forced expiratory volume in 1-second (FEV1), predicted percentage | family.Coriobacteriaceae.id.811             | Outlier-corrected |                       |             |              |             |             | 0.122 |
| 839 | Forced expiratory volume in 1-second (FEV1), predicted percentage | family.Defluviitaleaceae.id.1924            | Raw               | -0.00256972666368757  | 0.014438534 | -0.177976985 | 0.862294715 |             |       |
| 840 | Forced expiratory volume in 1-second (FEV1), predicted percentage | family.Defluviitaleaceae.id.1924            | Outlier-corrected |                       |             |              |             |             | 0.668 |
| 841 | Forced expiratory volume in 1-second (FEV1), predicted percentage | family.Desulfovibrionaceae.id.3169          | Raw               | 0.0460548387512945    | 0.029273353 | 1.573268313  | 0.15010763  |             |       |
| 842 | Forced expiratory volume in 1-second (FEV1), predicted percentage | family.Desulfovibrionaceae.id.3169          | Outlier-corrected |                       |             |              |             |             | 0.098 |
| 843 | Forced expiratory volume in 1-second (FEV1), predicted percentage | family.Enterobacteriaceae.id.3469           | Raw               | 0.0429971625370977    | 0.04374317  | 0.982945731  | 0.363593744 |             |       |
| 844 | Forced expiratory volume in 1-second (FEV1), predicted percentage | family.Enterobacteriaceae.id.3469           | Outlier-corrected | 0.0117710182821546    | 0.036519614 | 0.322320446  | 0.760250896 | rs2374342   | 0.04  |
| 845 | Forced expiratory volume in 1-second (FEV1), predicted percentage | family.Erysipelotrichaceae.id.2149          | Raw               | 0.0312715752958063    | 0.020918306 | 1.494938249  | 0.160756442 |             |       |
| 846 | Forced expiratory volume in 1-second (FEV1), predicted percentage | family.Erysipelotrichaceae.id.2149          | Outlier-corrected |                       |             |              |             |             | 0.627 |
| 847 | Forced expiratory volume in 1-second (FEV1), predicted percentage | family.FamilyXI.id.1936                     | Raw               | -0.00939242274260991  | 0.016620436 | -0.565112914 | 0.589640936 |             |       |
| 848 | Forced expiratory volume in 1-second (FEV1), predicted percentage | family.FamilyXI.id.1936                     | Outlier-corrected |                       |             |              |             |             | 0.092 |
| 849 | Forced expiratory volume in 1-second (FEV1), predicted percentage | family.FamilyXIII.id.1957                   | Raw               | -0.00847711578379325  | 0.029980907 | -0.282750481 | 0.783763454 |             |       |
| 850 | Forced expiratory volume in 1-second (FEV1), predicted percentage | family.FamilyXIII.id.1957                   | Outlier-corrected |                       |             |              |             |             | 0.145 |
| 851 | Forced expiratory volume in 1-second (FEV1), predicted percentage | family.Lachnospiraceae.id.1987              | Raw               | -0.0288005481852573   | 0.018031314 | -1.597251726 | 0.129768629 |             |       |
| 852 | Forced expiratory volume in 1-second (FEV1), predicted percentage | family.Lachnospiraceae.id.1987              | Outlier-corrected |                       |             |              |             |             | 0.573 |
| 853 | Forced expiratory volume in 1-second (FEV1), predicted percentage | family.Lactobacillaceae.id.1836             | Raw               | -0.0133468825789896   | 0.018709135 | -0.713388543 | 0.498692352 |             |       |
| 854 | Forced expiratory volume in 1-second (FEV1), predicted percentage | family.Lactobacillaceae.id.1836             | Outlier-corrected |                       |             |              |             |             | 0.308 |
| 855 | Forced expiratory volume in 1-second (FEV1), predicted percentage | family.Methanobacteriaceae.id.121           | Raw               | 0.000510766671729285  | 0.017303609 | 0.029517928  | 0.977275472 |             |       |
| 856 | Forced expiratory volume in 1-second (FEV1), predicted percentage | family.Methanobacteriaceae.id.121           | Outlier-corrected |                       |             |              |             |             | 0.11  |
| 857 | Forced expiratory volume in 1-second (FEV1), predicted percentage | family.Oxalobacteraceae.id.2966             | Raw               | -0.000267043996559585 | 0.013121733 | -0.020351275 | 0.984072201 |             |       |
| 858 | Forced expiratory volume in 1-second (FEV1), predicted percentage | family.Oxalobacteraceae.id.2966             | Outlier-corrected |                       |             |              |             |             | 0.242 |
| 859 | Forced expiratory volume in 1-second (FEV1), predicted percentage | family.Pasteurellaceae.id.3689              | Raw               | 0.0189446424586129    | 0.016698395 | 1.134518762  | 0.277063936 |             |       |
| 860 | Forced expiratory volume in 1-second (FEV1), predicted percentage | family.Pasteurellaceae.id.3689              | Outlier-corrected |                       |             |              |             |             | 0.148 |
| 861 | Forced expiratory volume in 1-second (FEV1), predicted percentage | family.Peptococcaceae.id.2024               | Raw               | 0.0394942977315808    | 0.032421568 | 1.218148894  | 0.257871303 |             |       |
| 862 | Forced expiratory volume in 1-second (FEV1), predicted percentage | family.Peptococcaceae.id.2024               | Outlier-corrected | 0.074020283918643     | 0.031794194 | 2.328106975  | 0.052760765 | rs117452796 | 0.005 |
| 863 | Forced expiratory volume in 1-second (FEV1), predicted percentage | family.Peptostreptococcaceae.id.2042        | Raw               | -0.0166334543966112   | 0.011362432 | -1.463899128 | 0.168920165 |             |       |
| 864 | Forced expiratory volume in 1-second (FEV1), predicted percentage | family.Peptostreptococcaceae.id.2042        | Outlier-corrected |                       |             |              |             |             | 0.973 |
| 865 | Forced expiratory volume in 1-second (FEV1), predicted percentage | family.Porphyromonadaceae.id.943            | Raw               | 0.0177624442783864    | 0.027998862 | 0.634398805  | 0.543531436 |             |       |
| 866 | Forced expiratory volume in 1-second (FEV1), predicted percentage | family.Porphyromonadaceae.id.943            | Outlier-corrected |                       |             |              |             |             | 0.481 |
| 867 | Forced expiratory volume in 1-second (FEV1), predicted percentage | family.Prevotellaceae.id.960                | Raw               | -0.00687068539619007  | 0.020325317 | -0.338035834 | 0.740351711 |             |       |

|     | A                                                                 | B                                                 | C                 | D                     | E           | F            | G           | H                     | I     |
|-----|-------------------------------------------------------------------|---------------------------------------------------|-------------------|-----------------------|-------------|--------------|-------------|-----------------------|-------|
| 868 | Forced expiratory volume in 1-second (FEV1), predicted percentage | family.Prevotellaceae.id.960                      | Outlier-corrected |                       |             |              |             |                       | 0.301 |
| 869 | Forced expiratory volume in 1-second (FEV1), predicted percentage | family.Rhodospirillaceae.id.2717                  | Raw               | 0.0168559193990311    | 0.022467701 | 0.750228932  | 0.466478897 |                       |       |
| 870 | Forced expiratory volume in 1-second (FEV1), predicted percentage | family.Rhodospirillaceae.id.2717                  | Outlier-corrected |                       |             |              |             | NA                    | 0.016 |
| 871 | Forced expiratory volume in 1-second (FEV1), predicted percentage | family.Rikenellaceae.id.967                       | Raw               | 0.000100351809180995  | 0.027761316 | 0.003614807  | 0.997155569 |                       |       |
| 872 | Forced expiratory volume in 1-second (FEV1), predicted percentage | family.Rikenellaceae.id.967                       | Outlier-corrected | 0.000991399404747368  | 0.021120924 | 0.046939206  | 0.96314258  | rs36021379,rs67705352 | 0.005 |
| 873 | Forced expiratory volume in 1-second (FEV1), predicted percentage | family.Ruminococcaceae.id.2050                    | Raw               | 0.00321663370314873   | 0.028045503 | 0.114693385  | 0.911206188 |                       |       |
| 874 | Forced expiratory volume in 1-second (FEV1), predicted percentage | family.Ruminococcaceae.id.2050                    | Outlier-corrected |                       |             |              |             |                       | 0.144 |
| 875 | Forced expiratory volume in 1-second (FEV1), predicted percentage | family.Streptococcaceae.id.1850                   | Raw               | -0.0184034231773393   | 0.028848052 | -0.637943366 | 0.536564492 |                       |       |
| 876 | Forced expiratory volume in 1-second (FEV1), predicted percentage | family.Streptococcaceae.id.1850                   | Outlier-corrected |                       |             |              |             |                       | 0.114 |
| 877 | Forced expiratory volume in 1-second (FEV1), predicted percentage | family.Veillonellaceae.id.2172                    | Raw               | -0.0195033073184625   | 0.018484432 | -1.055120715 | 0.305327321 |                       |       |
| 878 | Forced expiratory volume in 1-second (FEV1), predicted percentage | family.Veillonellaceae.id.2172                    | Outlier-corrected |                       |             |              |             |                       | 0.146 |
| 879 | Forced expiratory volume in 1-second (FEV1), predicted percentage | family.Verrucomicrobiaceae.id.4036                | Raw               | 0.0266085801194734    | 0.022414778 | 1.187099852  | 0.262622215 |                       |       |
| 880 | Forced expiratory volume in 1-second (FEV1), predicted percentage | family.Verrucomicrobiaceae.id.4036                | Outlier-corrected |                       |             |              |             |                       | 0.225 |
| 881 | Forced expiratory volume in 1-second (FEV1), predicted percentage | family.Victivallaceae.id.2255                     | Raw               | -0.00471688316678717  | 0.013433866 | -0.351118822 | 0.732131844 |                       |       |
| 882 | Forced expiratory volume in 1-second (FEV1), predicted percentage | family.Victivallaceae.id.2255                     | Outlier-corrected |                       |             |              |             |                       | 0.091 |
| 883 | Forced expiratory volume in 1-second (FEV1), predicted percentage | genus..Clostridiuminnocuumgroup.id.14397          | Raw               | 0.0113887946388417    | 0.010033194 | 1.135111579  | 0.289190762 |                       |       |
| 884 | Forced expiratory volume in 1-second (FEV1), predicted percentage | genus..Clostridiuminnocuumgroup.id.14397          | Outlier-corrected |                       |             |              |             |                       | 0.825 |
| 885 | Forced expiratory volume in 1-second (FEV1), predicted percentage | genus..Eubacteriumbrachygroup.id.11296            | Raw               | -0.0131884306997814   | 0.012393067 | -1.064178105 | 0.31496515  |                       |       |
| 886 | Forced expiratory volume in 1-second (FEV1), predicted percentage | genus..Eubacteriumbrachygroup.id.11296            | Outlier-corrected |                       |             |              |             |                       | 0.458 |
| 887 | Forced expiratory volume in 1-second (FEV1), predicted percentage | genus..Eubacteriumcoprostanoligenesgroup.id.11375 | Raw               | -0.0200225465782773   | 0.031045372 | -0.644944645 | 0.531100132 |                       |       |
| 888 | Forced expiratory volume in 1-second (FEV1), predicted percentage | genus..Eubacteriumcoprostanoligenesgroup.id.11375 | Outlier-corrected |                       |             |              |             | NA                    | 0.036 |
| 889 | Forced expiratory volume in 1-second (FEV1), predicted percentage | genus..Eubacteriumeligensgroup.id.14372           | Raw               | -0.0604094775820861   | 0.015469124 | -3.905164673 | 0.007936531 |                       |       |
| 890 | Forced expiratory volume in 1-second (FEV1), predicted percentage | genus..Eubacteriumeligensgroup.id.14372           | Outlier-corrected |                       |             |              |             |                       | 0.945 |
| 891 | Forced expiratory volume in 1-second (FEV1), predicted percentage | genus..Eubacteriumfissicatenaingroup.id.14373     | Raw               | -0.0108445440483442   | 0.016776036 | -0.646430644 | 0.538609223 |                       |       |
| 892 | Forced expiratory volume in 1-second (FEV1), predicted percentage | genus..Eubacteriumfissicatenaingroup.id.14373     | Outlier-corrected |                       |             |              |             |                       | 0.158 |
| 893 | Forced expiratory volume in 1-second (FEV1), predicted percentage | genus..Eubacteriumhalliigroup.id.11338            | Raw               | -0.00398265554935646  | 0.019659733 | -0.202579329 | 0.842185972 |                       |       |
| 894 | Forced expiratory volume in 1-second (FEV1), predicted percentage | genus..Eubacteriumhalliigroup.id.11338            | Outlier-corrected |                       |             |              |             |                       | 0.243 |
| 895 | Forced expiratory volume in 1-second (FEV1), predicted percentage | genus..Eubacteriumnodatumgroup.id.11297           | Raw               | 0.00496118862950459   | 0.01135693  | 0.436842403  | 0.671507632 |                       |       |
| 896 | Forced expiratory volume in 1-second (FEV1), predicted percentage | genus..Eubacteriumnodatumgroup.id.11297           | Outlier-corrected |                       |             |              |             |                       | 0.374 |
| 897 | Forced expiratory volume in 1-second (FEV1), predicted percentage | genus..Eubacteriumoxidoreducensgroup.id.11339     | Raw               | -0.00163486672521761  | 0.017938137 | -0.091139161 | 0.931763658 |                       |       |
| 898 | Forced expiratory volume in 1-second (FEV1), predicted percentage | genus..Eubacteriumoxidoreducensgroup.id.11339     | Outlier-corrected |                       |             |              |             |                       | 0.509 |
| 899 | Forced expiratory volume in 1-second (FEV1), predicted percentage | genus..Eubacteriumrectalegroup.id.14374           | Raw               | -0.0208608132949321   | 0.017753105 | -1.17505154  | 0.278391181 |                       |       |
| 900 | Forced expiratory volume in 1-second (FEV1), predicted percentage | genus..Eubacteriumrectalegroup.id.14374           | Outlier-corrected |                       |             |              |             |                       | 0.903 |
| 901 | Forced expiratory volume in 1-second (FEV1), predicted percentage | genus..Eubacteriumruminantiumgroup.id.11340       | Raw               | 0.0193562373961831    | 0.013747843 | 1.40794719   | 0.177170775 |                       |       |
| 902 | Forced expiratory volume in 1-second (FEV1), predicted percentage | genus..Eubacteriumruminantiumgroup.id.11340       | Outlier-corrected |                       |             |              |             |                       | 0.303 |
| 903 | Forced expiratory volume in 1-second (FEV1), predicted percentage | genus..Eubacteriumventriosumgroup.id.11341        | Raw               | -0.000318171498024609 | 0.014546953 | -0.021872038 | 0.982882183 |                       |       |
| 904 | Forced expiratory volume in 1-second (FEV1), predicted percentage | genus..Eubacteriumventriosumgroup.id.11341        | Outlier-corrected |                       |             |              |             |                       | 0.932 |
| 905 | Forced expiratory volume in 1-second (FEV1), predicted percentage | genus..Eubacteriumxylanophilumgroup.id.14375      | Raw               | 0.0178850623932724    | 0.03636212  | 0.49185972   | 0.636029766 |                       |       |
| 906 | Forced expiratory volume in 1-second (FEV1), predicted percentage | genus..Eubacteriumxylanophilumgroup.id.14375      | Outlier-corrected |                       |             |              |             | NA                    | 0.024 |
| 907 | Forced expiratory volume in 1-second (FEV1), predicted percentage | genus..Ruminococcusgavureauigroup.id.11342        | Raw               | 0.0266581334272021    | 0.036384335 | 0.732681615  | 0.479074743 |                       |       |
| 908 | Forced expiratory volume in 1-second (FEV1), predicted percentage | genus..Ruminococcusgavureauigroup.id.11342        | Outlier-corrected | 0.0249762670974222    | 0.029082148 | 0.85881782   | 0.412729504 | rs2105937,rs2166943   | 0.001 |
| 909 | Forced expiratory volume in 1-second (FEV1), predicted percentage | genus..Ruminococcusgnavusgroup.id.14376           | Raw               | -0.00160937334931349  | 0.017441463 | -0.09227284  | 0.928303632 |                       |       |
| 910 | Forced expiratory volume in 1-second (FEV1), predicted percentage | genus..Ruminococcusgnavusgroup.id.14376           | Outlier-corrected |                       |             |              |             |                       | 0.166 |
| 911 | Forced expiratory volume in 1-second (FEV1), predicted percentage | genus..Ruminococcusstorquesgroup.id.14377         | Raw               | -0.00364828792596874  | 0.017880113 | -0.204041664 | 0.843415942 |                       |       |
| 912 | Forced expiratory volume in 1-second (FEV1), predicted percentage | genus..Ruminococcusstorquesgroup.id.14377         | Outlier-corrected |                       |             |              |             |                       | 0.869 |
| 913 | Forced expiratory volume in 1-second (FEV1), predicted percentage | genus.Actinomyces.id.423                          | Raw               | -0.015840549568512    | 0.020652727 | -0.766995547 | 0.472175464 |                       |       |
| 914 | Forced expiratory volume in 1-second (FEV1), predicted percentage | genus.Actinomyces.id.423                          | Outlier-corrected |                       |             |              |             |                       | 0.353 |
| 915 | Forced expiratory volume in 1-second (FEV1), predicted percentage | genus.Adlercreutzia.id.812                        | Raw               | 0.0112173974471688    | 0.028742309 | 0.390274752  | 0.707937476 |                       |       |
| 916 | Forced expiratory volume in 1-second (FEV1), predicted percentage | genus.Adlercreutzia.id.812                        | Outlier-corrected |                       |             |              |             |                       | 0.065 |
| 917 | Forced expiratory volume in 1-second (FEV1), predicted percentage | genus.Akkermansia.id.4037                         | Raw               | 0.0266444896824212    | 0.022395861 | 1.18970598   | 0.261641499 |                       |       |
| 918 | Forced expiratory volume in 1-second (FEV1), predicted percentage | genus.Akkermansia.id.4037                         | Outlier-corrected |                       |             |              |             |                       | 0.208 |

|     | A                                                                 | B                                          | C                 | D                    | E           | F            | G           | H                    | I     |
|-----|-------------------------------------------------------------------|--------------------------------------------|-------------------|----------------------|-------------|--------------|-------------|----------------------|-------|
| 919 | Forced expiratory volume in 1-second (FEV1), predicted percentage | genus.Alistipes.id.968                     | Raw               | 0.0246404668319324   | 0.03372103  | 0.730715123  | 0.477916791 |                      |       |
| 920 | Forced expiratory volume in 1-second (FEV1), predicted percentage | genus.Alistipes.id.968                     | Outlier-corrected | 0.0049655523035966   | 0.030608022 | 0.162230421  | 0.87382409  | rs67705352           | 0.008 |
| 921 | Forced expiratory volume in 1-second (FEV1), predicted percentage | genus.Allisonella.id.2174                  | Raw               | 0.00977695950273639  | 0.013042433 | 0.749626948  | 0.477910795 |                      |       |
| 922 | Forced expiratory volume in 1-second (FEV1), predicted percentage | genus.Allisonella.id.2174                  | Outlier-corrected |                      |             |              |             |                      | 0.342 |
| 923 | Forced expiratory volume in 1-second (FEV1), predicted percentage | genus.Alloprevotella.id.961                | Raw               | -0.0120633060353339  | 0.012584979 | -0.958547943 | 0.381808937 |                      |       |
| 924 | Forced expiratory volume in 1-second (FEV1), predicted percentage | genus.Alloprevotella.id.961                | Outlier-corrected |                      |             |              |             |                      | 0.607 |
| 925 | Forced expiratory volume in 1-second (FEV1), predicted percentage | genus.Anaerofilum.id.2053                  | Raw               | 0.00392224550154095  | 0.01027839  | 0.381601166  | 0.710740301 |                      |       |
| 926 | Forced expiratory volume in 1-second (FEV1), predicted percentage | genus.Anaerofilum.id.2053                  | Outlier-corrected |                      |             |              |             |                      | 0.803 |
| 927 | Forced expiratory volume in 1-second (FEV1), predicted percentage | genus.Anaerostipes.id.1991                 | Raw               | 0.0326194653574229   | 0.03203125  | 1.018363812  | 0.33038068  |                      |       |
| 928 | Forced expiratory volume in 1-second (FEV1), predicted percentage | genus.Anaerostipes.id.1991                 | Outlier-corrected |                      |             |              |             | NA                   | 0.03  |
| 929 | Forced expiratory volume in 1-second (FEV1), predicted percentage | genus.Anaerotruncus.id.2054                | Raw               | 0.0241858936176164   | 0.030754477 | 0.786418631  | 0.446874738 |                      |       |
| 930 | Forced expiratory volume in 1-second (FEV1), predicted percentage | genus.Anaerotruncus.id.2054                | Outlier-corrected | 0.0508829865234595   | 0.024314908 | 2.092666217  | 0.060361622 | rs11018566           | 0.017 |
| 931 | Forced expiratory volume in 1-second (FEV1), predicted percentage | genus.Bacteroides.id.918                   | Raw               | -0.0265704896840105  | 0.015152608 | -1.753525833 | 0.117600169 |                      |       |
| 932 | Forced expiratory volume in 1-second (FEV1), predicted percentage | genus.Bacteroides.id.918                   | Outlier-corrected |                      |             |              |             |                      | 0.968 |
| 933 | Forced expiratory volume in 1-second (FEV1), predicted percentage | genus.Barnesiella.id.944                   | Raw               | 0.00189104129917634  | 0.027646849 | 0.068399885  | 0.946508194 |                      |       |
| 934 | Forced expiratory volume in 1-second (FEV1), predicted percentage | genus.Barnesiella.id.944                   | Outlier-corrected |                      |             |              |             | NA                   | 0.011 |
| 935 | Forced expiratory volume in 1-second (FEV1), predicted percentage | genus.Bifidobacterium.id.436               | Raw               | 0.000748384925212089 | 0.036348971 | 0.020588889  | 0.983978627 |                      |       |
| 936 | Forced expiratory volume in 1-second (FEV1), predicted percentage | genus.Bifidobacterium.id.436               | Outlier-corrected | 0.00133811550270223  | 0.025530641 | 0.052412139  | 0.959485421 | rs56108664,rs5746486 | 0.003 |
| 937 | Forced expiratory volume in 1-second (FEV1), predicted percentage | genus.Bilophila.id.3170                    | Raw               | -0.0235378670884791  | 0.025395228 | -0.926861811 | 0.373887428 |                      |       |
| 938 | Forced expiratory volume in 1-second (FEV1), predicted percentage | genus.Bilophila.id.3170                    | Outlier-corrected |                      |             |              |             |                      | 0.153 |
| 939 | Forced expiratory volume in 1-second (FEV1), predicted percentage | genus.Blautia.id.1992                      | Raw               | -0.0235543172686388  | 0.021363471 | -1.102551052 | 0.293760088 |                      |       |
| 940 | Forced expiratory volume in 1-second (FEV1), predicted percentage | genus.Blautia.id.1992                      | Outlier-corrected |                      |             |              |             |                      | 0.533 |
| 941 | Forced expiratory volume in 1-second (FEV1), predicted percentage | genus.Butyricicoccus.id.2055               | Raw               | 0.030632470271228    | 0.02915096  | 1.050822021  | 0.328258344 |                      |       |
| 942 | Forced expiratory volume in 1-second (FEV1), predicted percentage | genus.Butyricicoccus.id.2055               | Outlier-corrected |                      |             |              |             |                      | 0.135 |
| 943 | Forced expiratory volume in 1-second (FEV1), predicted percentage | genus.Butyricimonas.id.945                 | Raw               | -0.0246017246844301  | 0.022017986 | -1.117346728 | 0.28765638  |                      |       |
| 944 | Forced expiratory volume in 1-second (FEV1), predicted percentage | genus.Butyricimonas.id.945                 | Outlier-corrected |                      |             |              |             |                      | 0.164 |
| 945 | Forced expiratory volume in 1-second (FEV1), predicted percentage | genus.Butyrivibrio.id.1993                 | Raw               | 0.0125648728778833   | 0.01131755  | 1.110211383  | 0.285613281 |                      |       |
| 946 | Forced expiratory volume in 1-second (FEV1), predicted percentage | genus.Butyrivibrio.id.1993                 | Outlier-corrected |                      |             |              |             |                      | 0.142 |
| 947 | Forced expiratory volume in 1-second (FEV1), predicted percentage | genus.CandidatusSoleaferrea.id.11350       | Raw               | 0.010728019167589    | 0.016254626 | 0.659997917  | 0.527795736 |                      |       |
| 948 | Forced expiratory volume in 1-second (FEV1), predicted percentage | genus.CandidatusSoleaferrea.id.11350       | Outlier-corrected |                      |             |              |             |                      | 0.465 |
| 949 | Forced expiratory volume in 1-second (FEV1), predicted percentage | genus.Catenibacterium.id.2153              | Raw               | -0.0396143466404413  | 0.021506568 | -1.841965092 | 0.139280679 |                      |       |
| 950 | Forced expiratory volume in 1-second (FEV1), predicted percentage | genus.Catenibacterium.id.2153              | Outlier-corrected |                      |             |              |             |                      | 0.163 |
| 951 | Forced expiratory volume in 1-second (FEV1), predicted percentage | genus.ChristensenellaceaeR.7group.id.11283 | Raw               | 0.0275484133293824   | 0.041277189 | 0.667400415  | 0.521259558 |                      |       |
| 952 | Forced expiratory volume in 1-second (FEV1), predicted percentage | genus.ChristensenellaceaeR.7group.id.11283 | Outlier-corrected | 0.000102194613542195 | 0.031081552 | 0.003287951  | 0.99745711  | rs10461257           | 0.011 |
| 953 | Forced expiratory volume in 1-second (FEV1), predicted percentage | genus.Clostridiumsensustricto1.id.1873     | Raw               | 0.0224653124334932   | 0.026705445 | 0.841225924  | 0.432463025 |                      |       |
| 954 | Forced expiratory volume in 1-second (FEV1), predicted percentage | genus.Clostridiumsensustricto1.id.1873     | Outlier-corrected |                      |             |              |             |                      | 0.273 |
| 955 | Forced expiratory volume in 1-second (FEV1), predicted percentage | genus.Collinsella.id.815                   | Raw               | 0.0193782687137187   | 0.015577874 | 1.243961075  | 0.248725965 |                      |       |
| 956 | Forced expiratory volume in 1-second (FEV1), predicted percentage | genus.Collinsella.id.815                   | Outlier-corrected |                      |             |              |             |                      | 0.924 |
| 957 | Forced expiratory volume in 1-second (FEV1), predicted percentage | genus.Coproacter.id.949                    | Raw               | -0.0287504813277381  | 0.021110261 | -1.361919761 | 0.203112938 |                      |       |
| 958 | Forced expiratory volume in 1-second (FEV1), predicted percentage | genus.Coproacter.id.949                    | Outlier-corrected | -0.0142524815236869  | 0.015713523 | -0.907020103 | 0.388035835 | rs12996055           | 0.033 |
| 959 | Forced expiratory volume in 1-second (FEV1), predicted percentage | genus.Coprococcus1.id.11301                | Raw               | -0.00187130033364677 | 0.025352028 | -0.07381265  | 0.942484617 |                      |       |
| 960 | Forced expiratory volume in 1-second (FEV1), predicted percentage | genus.Coprococcus1.id.11301                | Outlier-corrected |                      |             |              |             |                      | 0.103 |
| 961 | Forced expiratory volume in 1-second (FEV1), predicted percentage | genus.Coprococcus2.id.11302                | Raw               | -0.0212314243809486  | 0.028032035 | -0.757398616 | 0.473530404 |                      |       |
| 962 | Forced expiratory volume in 1-second (FEV1), predicted percentage | genus.Coprococcus2.id.11302                | Outlier-corrected |                      |             |              |             |                      | 0.252 |
| 963 | Forced expiratory volume in 1-second (FEV1), predicted percentage | genus.Coprococcus3.id.11303                | Raw               | -0.043011542536316   | 0.030359054 | -1.416761611 | 0.194294734 |                      |       |
| 964 | Forced expiratory volume in 1-second (FEV1), predicted percentage | genus.Coprococcus3.id.11303                | Outlier-corrected |                      |             |              |             |                      | 0.174 |
| 965 | Forced expiratory volume in 1-second (FEV1), predicted percentage | genus.DefluviitaleaceaeUCG011.id.11287     | Raw               | 0.00143453379318781  | 0.022619316 | 0.063420742  | 0.950987483 |                      |       |
| 966 | Forced expiratory volume in 1-second (FEV1), predicted percentage | genus.DefluviitaleaceaeUCG011.id.11287     | Outlier-corrected |                      |             |              |             |                      | 0.157 |
| 967 | Forced expiratory volume in 1-second (FEV1), predicted percentage | genus.Desulfovibrio.id.3173                | Raw               | 0.0108301347109198   | 0.023563313 | 0.459618509  | 0.656690669 |                      |       |
| 968 | Forced expiratory volume in 1-second (FEV1), predicted percentage | genus.Desulfovibrio.id.3173                | Outlier-corrected |                      |             |              |             |                      | 0.123 |
| 969 | Forced expiratory volume in 1-second (FEV1), predicted percentage | genus.Dialister.id.2183                    | Raw               | 0.0263068374676184   | 0.028197956 | 0.932934188  | 0.37520451  |                      |       |

|      | A                                                                 | B                                         | C                 | D                    | E           | F            | G           | H        | I     |
|------|-------------------------------------------------------------------|-------------------------------------------|-------------------|----------------------|-------------|--------------|-------------|----------|-------|
| 970  | Forced expiratory volume in 1-second (FEV1), predicted percentage | genus.Dialister.id.2183                   | Outlier-corrected |                      |             |              |             |          | 0.095 |
| 971  | Forced expiratory volume in 1-second (FEV1), predicted percentage | genus.Dorea.id.1997                       | Raw               | 0.0273469209854262   | 0.026567607 | 1.029333246  | 0.330190841 |          |       |
| 972  | Forced expiratory volume in 1-second (FEV1), predicted percentage | genus.Dorea.id.1997                       | Outlier-corrected |                      |             |              |             |          | 0.343 |
| 973  | Forced expiratory volume in 1-second (FEV1), predicted percentage | genus.Eggerthella.id.819                  | Raw               | -0.00773274856056745 | 0.01898485  | -0.407311546 | 0.692361424 |          |       |
| 974  | Forced expiratory volume in 1-second (FEV1), predicted percentage | genus.Eggerthella.id.819                  | Outlier-corrected |                      |             |              |             | NA       | 0.038 |
| 975  | Forced expiratory volume in 1-second (FEV1), predicted percentage | genus.Eisenbergiella.id.11304             | Raw               | 0.0343257836108433   | 0.016053591 | 2.138199692  | 0.058211361 |          |       |
| 976  | Forced expiratory volume in 1-second (FEV1), predicted percentage | genus.Eisenbergiella.id.11304             | Outlier-corrected |                      |             |              |             |          | 0.299 |
| 977  | Forced expiratory volume in 1-second (FEV1), predicted percentage | genus.Enterorhabdus.id.820                | Raw               | -0.00865591875391337 | 0.021841984 | -0.396297274 | 0.708232993 |          |       |
| 978  | Forced expiratory volume in 1-second (FEV1), predicted percentage | genus.Enterorhabdus.id.820                | Outlier-corrected |                      |             |              |             |          | 0.377 |
| 979  | Forced expiratory volume in 1-second (FEV1), predicted percentage | genus.Erysipelatoclostridium.id.11381     | Raw               | 0.0179433633148646   | 0.011738209 | 1.528628719  | 0.148631904 |          |       |
| 980  | Forced expiratory volume in 1-second (FEV1), predicted percentage | genus.Erysipelatoclostridium.id.11381     | Outlier-corrected |                      |             |              |             |          | 0.891 |
| 981  | Forced expiratory volume in 1-second (FEV1), predicted percentage | genus.ErysipelotrichaceaeUCG003.id.11384  | Raw               | -0.0103053500516074  | 0.017902743 | -0.575629667 | 0.573400578 |          |       |
| 982  | Forced expiratory volume in 1-second (FEV1), predicted percentage | genus.ErysipelotrichaceaeUCG003.id.11384  | Outlier-corrected |                      |             |              |             |          | 0.418 |
| 983  | Forced expiratory volume in 1-second (FEV1), predicted percentage | genus.Escherichia.Shigella.id.3504        | Raw               | 0.0500610001294702   | 0.026908418 | 1.860421529  | 0.095749082 |          |       |
| 984  | Forced expiratory volume in 1-second (FEV1), predicted percentage | genus.Escherichia.Shigella.id.3504        | Outlier-corrected |                      |             |              |             |          | 0.117 |
| 985  | Forced expiratory volume in 1-second (FEV1), predicted percentage | genus.Faecalibacterium.id.2057            | Raw               | -0.0415418495982652  | 0.030646962 | -1.35549648  | 0.212284345 |          |       |
| 986  | Forced expiratory volume in 1-second (FEV1), predicted percentage | genus.Faecalibacterium.id.2057            | Outlier-corrected |                      |             |              |             |          | 0.072 |
| 987  | Forced expiratory volume in 1-second (FEV1), predicted percentage | genus.FamilyXIIID3011group.id.11293       | Raw               | 0.0271512944883233   | 0.025085864 | 1.082334424  | 0.304511858 |          |       |
| 988  | Forced expiratory volume in 1-second (FEV1), predicted percentage | genus.FamilyXIIID3011group.id.11293       | Outlier-corrected |                      |             |              |             |          | 0.265 |
| 989  | Forced expiratory volume in 1-second (FEV1), predicted percentage | genus.FamilyXIIICUG001.id.11294           | Raw               | -0.0168343564423327  | 0.017594392 | -0.956802386 | 0.370536407 |          |       |
| 990  | Forced expiratory volume in 1-second (FEV1), predicted percentage | genus.FamilyXIIICUG001.id.11294           | Outlier-corrected |                      |             |              |             |          | 0.794 |
| 991  | Forced expiratory volume in 1-second (FEV1), predicted percentage | genus.Flavonifractor.id.2059              | Raw               | -0.0038389653294114  | 0.055887846 | -0.068690522 | 0.948532688 |          |       |
| 992  | Forced expiratory volume in 1-second (FEV1), predicted percentage | genus.Flavonifractor.id.2059              | Outlier-corrected | -0.0554140169503193  | 0.028010202 | -1.978351229 | 0.142285449 | rs806808 | 0.012 |
| 993  | Forced expiratory volume in 1-second (FEV1), predicted percentage | genus.Fusicatenibacter.id.11305           | Raw               | 0.0243861497164989   | 0.023539245 | 1.035978396  | 0.314724847 |          |       |
| 994  | Forced expiratory volume in 1-second (FEV1), predicted percentage | genus.Fusicatenibacter.id.11305           | Outlier-corrected |                      |             |              |             |          | 0.087 |
| 995  | Forced expiratory volume in 1-second (FEV1), predicted percentage | genus.Gordonibacter.id.821                | Raw               | -0.0201161599873919  | 0.008527162 | -2.359068503 | 0.0400168   |          |       |
| 996  | Forced expiratory volume in 1-second (FEV1), predicted percentage | genus.Gordonibacter.id.821                | Outlier-corrected |                      |             |              |             |          | 0.873 |
| 997  | Forced expiratory volume in 1-second (FEV1), predicted percentage | genus.Haemophilus.id.3698                 | Raw               | 0.0243609199620359   | 0.019608656 | 1.242355386  | 0.249286867 |          |       |
| 998  | Forced expiratory volume in 1-second (FEV1), predicted percentage | genus.Haemophilus.id.3698                 | Outlier-corrected |                      |             |              |             |          | 0.196 |
| 999  | Forced expiratory volume in 1-second (FEV1), predicted percentage | genus.Holdemanela.id.11393                | Raw               | -0.0155625728809362  | 0.016069483 | -0.968455082 | 0.355656263 |          |       |
| 1000 | Forced expiratory volume in 1-second (FEV1), predicted percentage | genus.Holdemanela.id.11393                | Outlier-corrected |                      |             |              |             |          | 0.345 |
| 1001 | Forced expiratory volume in 1-second (FEV1), predicted percentage | genus.Holdemania.id.2157                  | Raw               | 0.00390071986830751  | 0.020262352 | 0.192510713  | 0.850316963 |          |       |
| 1002 | Forced expiratory volume in 1-second (FEV1), predicted percentage | genus.Holdemania.id.2157                  | Outlier-corrected |                      |             |              |             | NA       | 0.025 |
| 1003 | Forced expiratory volume in 1-second (FEV1), predicted percentage | genus.Howardella.id.2000                  | Raw               | -0.0241114781772062  | 0.015799297 | -1.526110869 | 0.16132524  |          |       |
| 1004 | Forced expiratory volume in 1-second (FEV1), predicted percentage | genus.Howardella.id.2000                  | Outlier-corrected |                      |             |              |             |          | 0.108 |
| 1005 | Forced expiratory volume in 1-second (FEV1), predicted percentage | genus.Hungatella.id.11306                 | Raw               | 0.0171294605723955   | 0.016641732 | 1.029307573  | 0.36150213  |          |       |
| 1006 | Forced expiratory volume in 1-second (FEV1), predicted percentage | genus.Hungatella.id.11306                 | Outlier-corrected |                      |             |              |             |          | 0.549 |
| 1007 | Forced expiratory volume in 1-second (FEV1), predicted percentage | genus.Intestinibacter.id.11345            | Raw               | 0.00971178215666871  | 0.016150707 | 0.601322429  | 0.557965787 |          |       |
| 1008 | Forced expiratory volume in 1-second (FEV1), predicted percentage | genus.Intestinibacter.id.11345            | Outlier-corrected |                      |             |              |             |          | 0.668 |
| 1009 | Forced expiratory volume in 1-second (FEV1), predicted percentage | genus.Intestinimonas.id.2062              | Raw               | -0.00900858792364206 | 0.016234929 | -0.554889287 | 0.587150113 |          |       |
| 1010 | Forced expiratory volume in 1-second (FEV1), predicted percentage | genus.Intestinimonas.id.2062              | Outlier-corrected |                      |             |              |             |          | 0.391 |
| 1011 | Forced expiratory volume in 1-second (FEV1), predicted percentage | genus.Lachnodostridium.id.11308           | Raw               | -0.0462853641757461  | 0.031005505 | -1.492811162 | 0.161304978 |          |       |
| 1012 | Forced expiratory volume in 1-second (FEV1), predicted percentage | genus.Lachnodostridium.id.11308           | Outlier-corrected |                      |             |              |             |          | 0.074 |
| 1013 | Forced expiratory volume in 1-second (FEV1), predicted percentage | genus.Lachnospira.id.2004                 | Raw               | 0.00886309020282692  | 0.048904008 | 0.181234434  | 0.863301213 |          |       |
| 1014 | Forced expiratory volume in 1-second (FEV1), predicted percentage | genus.Lachnospira.id.2004                 | Outlier-corrected |                      |             |              |             |          | 0.075 |
| 1015 | Forced expiratory volume in 1-second (FEV1), predicted percentage | genus.LachnospiraceaeFCS020group.id.11314 | Raw               | -0.00471508696145087 | 0.013977885 | -0.337324768 | 0.74222097  |          |       |
| 1016 | Forced expiratory volume in 1-second (FEV1), predicted percentage | genus.LachnospiraceaeFCS020group.id.11314 | Outlier-corrected |                      |             |              |             |          | 0.893 |
| 1017 | Forced expiratory volume in 1-second (FEV1), predicted percentage | genus.LachnospiraceaeNC2004group.id.11316 | Raw               | -0.00404926080330332 | 0.015985058 | -0.253315363 | 0.80641274  |          |       |
| 1018 | Forced expiratory volume in 1-second (FEV1), predicted percentage | genus.LachnospiraceaeNC2004group.id.11316 | Outlier-corrected |                      |             |              |             |          | 0.467 |
| 1019 | Forced expiratory volume in 1-second (FEV1), predicted percentage | genus.LachnospiraceaeND3007group.id.11317 | dat<4SNP          | dat<4SNP             |             |              |             |          |       |
| 1020 | Forced expiratory volume in 1-second (FEV1), predicted percentage | genus.LachnospiraceaeND3007group.id.11317 |                   |                      |             |              |             |          |       |

|      | A                                                                 | B                                          | C                 | D                     | E           | F            | G           | H                    | I     |
|------|-------------------------------------------------------------------|--------------------------------------------|-------------------|-----------------------|-------------|--------------|-------------|----------------------|-------|
| 1021 | Forced expiratory volume in 1-second (FEV1), predicted percentage | genus.LachnospiraceaeNK4A136group.id.11319 | Raw               | 0.0216455836531061    | 0.018246911 | 1.186260167  | 0.258475857 |                      |       |
| 1022 | Forced expiratory volume in 1-second (FEV1), predicted percentage | genus.LachnospiraceaeNK4A136group.id.11319 | Outlier-corrected |                       |             |              |             |                      | 0.56  |
| 1023 | Forced expiratory volume in 1-second (FEV1), predicted percentage | genus.LachnospiraceaeUCG001.id.11321       | Raw               | 0.00818003013171962   | 0.014019908 | 0.583458177  | 0.570388658 |                      |       |
| 1024 | Forced expiratory volume in 1-second (FEV1), predicted percentage | genus.LachnospiraceaeUCG001.id.11321       | Outlier-corrected |                       |             |              |             |                      | 0.796 |
| 1025 | Forced expiratory volume in 1-second (FEV1), predicted percentage | genus.LachnospiraceaeUCG004.id.11324       | Raw               | -0.0135762811656288   | 0.0369877   | -0.367048539 | 0.721230935 |                      |       |
| 1026 | Forced expiratory volume in 1-second (FEV1), predicted percentage | genus.LachnospiraceaeUCG004.id.11324       | Outlier-corrected | -0.0615686788398538   | 0.01834276  | -3.356565642 | 0.009982528 | rs11128180,rs2726805 | 0.003 |
| 1027 | Forced expiratory volume in 1-second (FEV1), predicted percentage | genus.LachnospiraceaeUCG008.id.11328       | Raw               | -0.000392359387293104 | 0.014753562 | -0.026594214 | 0.979363736 |                      |       |
| 1028 | Forced expiratory volume in 1-second (FEV1), predicted percentage | genus.LachnospiraceaeUCG008.id.11328       | Outlier-corrected |                       |             |              |             |                      | 0.56  |
| 1029 | Forced expiratory volume in 1-second (FEV1), predicted percentage | genus.LachnospiraceaeUCG010.id.11330       | Raw               | 0.0307727682305009    | 0.028161331 | 1.092731326  | 0.302896729 |                      |       |
| 1030 | Forced expiratory volume in 1-second (FEV1), predicted percentage | genus.LachnospiraceaeUCG010.id.11330       | Outlier-corrected |                       |             |              |             |                      | 0.067 |
| 1031 | Forced expiratory volume in 1-second (FEV1), predicted percentage | genus.Lactobacillus.id.1837                | Raw               | -0.0176375670800452   | 0.019960976 | -0.883602445 | 0.410914225 |                      |       |
| 1032 | Forced expiratory volume in 1-second (FEV1), predicted percentage | genus.Lactobacillus.id.1837                | Outlier-corrected |                       |             |              |             |                      | 0.332 |
| 1033 | Forced expiratory volume in 1-second (FEV1), predicted percentage | genus.Lactococcus.id.1851                  | Raw               | -0.0308243960707447   | 0.019814927 | -1.555614893 | 0.158409944 |                      |       |
| 1034 | Forced expiratory volume in 1-second (FEV1), predicted percentage | genus.Lactococcus.id.1851                  | Outlier-corrected | -0.0450806974596214   | 0.013657736 | -3.300744572 | 0.013107284 | rs2293361            | 0.028 |
| 1035 | Forced expiratory volume in 1-second (FEV1), predicted percentage | genus.Marvinbryantia.id.2005               | Raw               | 0.041172137878715     | 0.02970274  | 1.386139412  | 0.199080743 |                      |       |
| 1036 | Forced expiratory volume in 1-second (FEV1), predicted percentage | genus.Marvinbryantia.id.2005               | Outlier-corrected |                       |             |              |             |                      | 0.059 |
| 1037 | Forced expiratory volume in 1-second (FEV1), predicted percentage | genus.Methanobrevibacter.id.123            | Raw               | -0.0166220385497528   | 0.016166314 | -1.028189775 | 0.361968314 |                      |       |
| 1038 | Forced expiratory volume in 1-second (FEV1), predicted percentage | genus.Methanobrevibacter.id.123            | Outlier-corrected |                       |             |              |             |                      | 0.45  |
| 1039 | Forced expiratory volume in 1-second (FEV1), predicted percentage | genus.Odoribacter.id.952                   | Raw               | -0.0360038772945984   | 0.046715354 | -0.770707577 | 0.470130403 |                      |       |
| 1040 | Forced expiratory volume in 1-second (FEV1), predicted percentage | genus.Odoribacter.id.952                   | Outlier-corrected | -0.0656414325156412   | 0.040107628 | -1.636632135 | 0.162634106 | rs4793970            | 0.022 |
| 1041 | Forced expiratory volume in 1-second (FEV1), predicted percentage | genus.Olsenella.id.822                     | Raw               | 0.00730158225956536   | 0.012197717 | 0.59860235   | 0.562750987 |                      |       |
| 1042 | Forced expiratory volume in 1-second (FEV1), predicted percentage | genus.Olsenella.id.822                     | Outlier-corrected |                       |             |              |             |                      | 0.374 |
| 1043 | Forced expiratory volume in 1-second (FEV1), predicted percentage | genus.Oscillibacter.id.2063                | Raw               | -0.0035354261964687   | 0.016862202 | -0.209665751 | 0.838138409 |                      |       |
| 1044 | Forced expiratory volume in 1-second (FEV1), predicted percentage | genus.Oscillibacter.id.2063                | Outlier-corrected |                       |             |              |             |                      | 0.448 |
| 1045 | Forced expiratory volume in 1-second (FEV1), predicted percentage | genus.Oscillospira.id.2064                 | Raw               | -0.0260701079878531   | 0.020140183 | -1.29443255  | 0.236578745 |                      |       |
| 1046 | Forced expiratory volume in 1-second (FEV1), predicted percentage | genus.Oscillospira.id.2064                 | Outlier-corrected |                       |             |              |             |                      | 0.557 |
| 1047 | Forced expiratory volume in 1-second (FEV1), predicted percentage | genus.Oxalobacter.id.2978                  | Raw               | -0.00653740290617503  | 0.00779224  | -0.838963231 | 0.421092449 |                      |       |
| 1048 | Forced expiratory volume in 1-second (FEV1), predicted percentage | genus.Oxalobacter.id.2978                  | Outlier-corrected |                       |             |              |             |                      | 0.948 |
| 1049 | Forced expiratory volume in 1-second (FEV1), predicted percentage | genus.Parabacteroides.id.954               | Raw               | 0.0222645409065598    | 0.024654453 | 0.903063682  | 0.40789083  |                      |       |
| 1050 | Forced expiratory volume in 1-second (FEV1), predicted percentage | genus.Parabacteroides.id.954               | Outlier-corrected |                       |             |              |             |                      | 0.65  |
| 1051 | Forced expiratory volume in 1-second (FEV1), predicted percentage | genus.Paraprevotella.id.962                | Raw               | 0.0158504757964858    | 0.012509528 | 1.267072221  | 0.231298482 |                      |       |
| 1052 | Forced expiratory volume in 1-second (FEV1), predicted percentage | genus.Paraprevotella.id.962                | Outlier-corrected |                       |             |              |             |                      | 0.69  |
| 1053 | Forced expiratory volume in 1-second (FEV1), predicted percentage | genus.Parasutterella.id.2892               | Raw               | -0.0055852645575289   | 0.024277959 | -0.230054951 | 0.821629476 |                      |       |
| 1054 | Forced expiratory volume in 1-second (FEV1), predicted percentage | genus.Parasutterella.id.2892               | Outlier-corrected | 0.0143806527798861    | 0.01558971  | 0.922445181  | 0.374471181 | rs2387977            | 0.025 |
| 1055 | Forced expiratory volume in 1-second (FEV1), predicted percentage | genus.Peptococcus.id.2037                  | Raw               | 0.00474995244869355   | 0.017544544 | 0.270736728  | 0.791606258 |                      |       |
| 1056 | Forced expiratory volume in 1-second (FEV1), predicted percentage | genus.Peptococcus.id.2037                  | Outlier-corrected |                       |             |              |             |                      | 0.074 |
| 1057 | Forced expiratory volume in 1-second (FEV1), predicted percentage | genus.Phascolarctobacterium.id.2168        | Raw               | -0.0098659017339137   | 0.015146728 | -0.651355329 | 0.531095014 |                      |       |
| 1058 | Forced expiratory volume in 1-second (FEV1), predicted percentage | genus.Phascolarctobacterium.id.2168        | Outlier-corrected |                       |             |              |             |                      | 0.83  |
| 1059 | Forced expiratory volume in 1-second (FEV1), predicted percentage | genus.Prevotella7.id.11182                 | Raw               | 0.0106012319723269    | 0.016309639 | 0.649997967  | 0.530341471 |                      |       |
| 1060 | Forced expiratory volume in 1-second (FEV1), predicted percentage | genus.Prevotella7.id.11182                 | Outlier-corrected |                       |             |              |             | NA                   | 0.029 |
| 1061 | Forced expiratory volume in 1-second (FEV1), predicted percentage | genus.Prevotella9.id.11183                 | Raw               | 0.0179256266647842    | 0.017169464 | 1.044041106  | 0.315492767 |                      |       |
| 1062 | Forced expiratory volume in 1-second (FEV1), predicted percentage | genus.Prevotella9.id.11183                 | Outlier-corrected |                       |             |              |             |                      | 0.317 |
| 1063 | Forced expiratory volume in 1-second (FEV1), predicted percentage | genus.RikenellaceaeRC9gutgroup.id.11191    | Raw               | -0.00693940998984476  | 0.010754559 | -0.64525287  | 0.533287292 |                      |       |
| 1064 | Forced expiratory volume in 1-second (FEV1), predicted percentage | genus.RikenellaceaeRC9gutgroup.id.11191    | Outlier-corrected |                       |             |              |             |                      | 0.526 |
| 1065 | Forced expiratory volume in 1-second (FEV1), predicted percentage | genus.Romboutsia.id.11347                  | Raw               | -0.00612264147559653  | 0.020096546 | -0.304661377 | 0.765843139 |                      |       |
| 1066 | Forced expiratory volume in 1-second (FEV1), predicted percentage | genus.Romboutsia.id.11347                  | Outlier-corrected |                       |             |              |             |                      | 0.307 |
| 1067 | Forced expiratory volume in 1-second (FEV1), predicted percentage | genus.Roseburia.id.2012                    | Raw               | -0.0718374131033099   | 0.023202248 | -3.09614018  | 0.009256135 |                      |       |
| 1068 | Forced expiratory volume in 1-second (FEV1), predicted percentage | genus.Roseburia.id.2012                    | Outlier-corrected |                       |             |              |             |                      | 0.405 |
| 1069 | Forced expiratory volume in 1-second (FEV1), predicted percentage | genus.Ruminiclostridium5.id.11355          | Raw               | -0.0114362150463775   | 0.028778781 | -0.397383577 | 0.700344429 |                      |       |
| 1070 | Forced expiratory volume in 1-second (FEV1), predicted percentage | genus.Ruminiclostridium5.id.11355          | Outlier-corrected |                       |             |              |             |                      | 0.348 |
| 1071 | Forced expiratory volume in 1-second (FEV1), predicted percentage | genus.Ruminiclostridium6.id.11356          | Raw               | 0.0143930047978645    | 0.022809809 | 0.631000659  | 0.538205933 |                      |       |

|      | A                                                                 | B                                          | C                 | D                    | E           | F            | G           | H                     | I     |
|------|-------------------------------------------------------------------|--------------------------------------------|-------------------|----------------------|-------------|--------------|-------------|-----------------------|-------|
| 1072 | Forced expiratory volume in 1-second (FEV1), predicted percentage | genus.Ruminiclostridium6.id.11356          | Outlier-corrected | 0.0169889605358865   | 0.017343662 | 0.979548665  | 0.346645126 | rs61060922,rs71414120 | 0.032 |
| 1073 | Forced expiratory volume in 1-second (FEV1), predicted percentage | genus.Ruminiclostridium9.id.11357          | Raw               | -0.0211639767039713  | 0.021105714 | -1.002760497 | 0.345338621 |                       |       |
| 1074 | Forced expiratory volume in 1-second (FEV1), predicted percentage | genus.Ruminiclostridium9.id.11357          | Outlier-corrected |                      |             |              |             |                       | 0.762 |
| 1075 | Forced expiratory volume in 1-second (FEV1), predicted percentage | genus.RuminococcaceaeNK4A214group.id.11358 | Raw               | 0.00732649308614738  | 0.024153174 | 0.303334583  | 0.76682953  |                       |       |
| 1076 | Forced expiratory volume in 1-second (FEV1), predicted percentage | genus.RuminococcaceaeNK4A214group.id.11358 | Outlier-corrected |                      |             |              |             |                       | 0.241 |
| 1077 | Forced expiratory volume in 1-second (FEV1), predicted percentage | genus.RuminococcaceaeUCG002.id.11360       | Raw               | -0.00480697539745828 | 0.014850858 | -0.323683354 | 0.749713554 |                       |       |
| 1078 | Forced expiratory volume in 1-second (FEV1), predicted percentage | genus.RuminococcaceaeUCG002.id.11360       | Outlier-corrected |                      |             |              |             |                       | 0.674 |
| 1079 | Forced expiratory volume in 1-second (FEV1), predicted percentage | genus.RuminococcaceaeUCG003.id.11361       | Raw               | 0.0129403289262507   | 0.02900459  | 0.446147626  | 0.6641452   |                       |       |
| 1080 | Forced expiratory volume in 1-second (FEV1), predicted percentage | genus.RuminococcaceaeUCG003.id.11361       | Outlier-corrected | 0.0296233856150869   | 0.024153546 | 1.226461133  | 0.248119835 | rs4532474             | 0.041 |
| 1081 | Forced expiratory volume in 1-second (FEV1), predicted percentage | genus.RuminococcaceaeUCG004.id.11362       | Raw               | 0.0192701119584813   | 0.027931142 | 0.689914926  | 0.50976236  |                       |       |
| 1082 | Forced expiratory volume in 1-second (FEV1), predicted percentage | genus.RuminococcaceaeUCG004.id.11362       | Outlier-corrected |                      |             |              |             |                       | 0.077 |
| 1083 | Forced expiratory volume in 1-second (FEV1), predicted percentage | genus.RuminococcaceaeUCG005.id.11363       | Raw               | -0.0255782674524726  | 0.028318325 | -0.903240848 | 0.382830121 |                       |       |
| 1084 | Forced expiratory volume in 1-second (FEV1), predicted percentage | genus.RuminococcaceaeUCG005.id.11363       | Outlier-corrected | -0.0414096251275814  | 0.025008896 | -1.655795837 | 0.123659481 | rs7586445             | 0.005 |
| 1085 | Forced expiratory volume in 1-second (FEV1), predicted percentage | genus.RuminococcaceaeUCG009.id.11366       | Raw               | 0.013012387062277    | 0.018174573 | 0.715966579  | 0.488932527 |                       |       |
| 1086 | Forced expiratory volume in 1-second (FEV1), predicted percentage | genus.RuminococcaceaeUCG009.id.11366       | Outlier-corrected |                      |             |              |             |                       | 0.22  |
| 1087 | Forced expiratory volume in 1-second (FEV1), predicted percentage | genus.RuminococcaceaeUCG010.id.11367       | Raw               | -0.0198661978487417  | 0.024104932 | -0.8241549   | 0.447368127 |                       |       |
| 1088 | Forced expiratory volume in 1-second (FEV1), predicted percentage | genus.RuminococcaceaeUCG010.id.11367       | Outlier-corrected |                      |             |              |             |                       | 0.586 |
| 1089 | Forced expiratory volume in 1-second (FEV1), predicted percentage | genus.RuminococcaceaeUCG011.id.11368       | Raw               | 0.0146023083970966   | 0.011403667 | 1.280492402  | 0.247642774 |                       |       |
| 1090 | Forced expiratory volume in 1-second (FEV1), predicted percentage | genus.RuminococcaceaeUCG011.id.11368       | Outlier-corrected |                      |             |              |             |                       | 0.671 |
| 1091 | Forced expiratory volume in 1-second (FEV1), predicted percentage | genus.RuminococcaceaeUCG013.id.11370       | Raw               | 0.00704013205765493  | 0.027075851 | 0.260015175  | 0.799654654 |                       |       |
| 1092 | Forced expiratory volume in 1-second (FEV1), predicted percentage | genus.RuminococcaceaeUCG013.id.11370       | Outlier-corrected |                      |             |              |             |                       | 0.08  |
| 1093 | Forced expiratory volume in 1-second (FEV1), predicted percentage | genus.RuminococcaceaeUCG014.id.11371       | Raw               | -0.0080564972100126  | 0.024588277 | -0.327656026 | 0.749928259 |                       |       |
| 1094 | Forced expiratory volume in 1-second (FEV1), predicted percentage | genus.RuminococcaceaeUCG014.id.11371       | Outlier-corrected |                      |             |              |             |                       | 0.247 |
| 1095 | Forced expiratory volume in 1-second (FEV1), predicted percentage | genus.Ruminococcus1.id.11373               | Raw               | 0.00823953984747932  | 0.03209538  | 0.256720432  | 0.803166936 |                       |       |
| 1096 | Forced expiratory volume in 1-second (FEV1), predicted percentage | genus.Ruminococcus1.id.11373               | Outlier-corrected |                      |             |              |             |                       | 0.069 |
| 1097 | Forced expiratory volume in 1-second (FEV1), predicted percentage | genus.Ruminococcus2.id.11374               | Raw               | -0.0163756514170712  | 0.018784536 | -0.871762364 | 0.399152309 |                       |       |
| 1098 | Forced expiratory volume in 1-second (FEV1), predicted percentage | genus.Ruminococcus2.id.11374               | Outlier-corrected |                      |             |              |             |                       | 0.526 |
| 1099 | Forced expiratory volume in 1-second (FEV1), predicted percentage | genus.Sellimonas.id.14369                  | Raw               | -0.00690215051160182 | 0.021844686 | -0.315964743 | 0.761241899 |                       |       |
| 1100 | Forced expiratory volume in 1-second (FEV1), predicted percentage | genus.Sellimonas.id.14369                  | Outlier-corrected | 0.00868897021520515  | 0.01676554  | 0.518263675  | 0.622823553 | rs113379006           | 0.006 |
| 1101 | Forced expiratory volume in 1-second (FEV1), predicted percentage | genus.Senegalimassilia.id.11160            | Raw               | -0.047091128670937   | 0.013904977 | -3.386638304 | 0.027615565 |                       |       |
| 1102 | Forced expiratory volume in 1-second (FEV1), predicted percentage | genus.Senegalimassilia.id.11160            | Outlier-corrected |                      |             |              |             |                       | 0.853 |
| 1103 | Forced expiratory volume in 1-second (FEV1), predicted percentage | genus.Slackia.id.825                       | Raw               | -0.013559249164003   | 0.017230628 | -0.786927143 | 0.466967752 |                       |       |
| 1104 | Forced expiratory volume in 1-second (FEV1), predicted percentage | genus.Slackia.id.825                       | Outlier-corrected |                      |             |              |             |                       | 0.633 |
| 1105 | Forced expiratory volume in 1-second (FEV1), predicted percentage | genus.Streptococcus.id.1853                | Raw               | -0.0214670923529906  | 0.028318608 | -0.758056071 | 0.461939189 |                       |       |
| 1106 | Forced expiratory volume in 1-second (FEV1), predicted percentage | genus.Streptococcus.id.1853                | Outlier-corrected |                      |             |              |             | NA                    | 0.032 |
| 1107 | Forced expiratory volume in 1-second (FEV1), predicted percentage | genus.Subdoligranulum.id.2070              | Raw               | 0.00909293617205689  | 0.033012028 | 0.275443122  | 0.789195295 |                       |       |
| 1108 | Forced expiratory volume in 1-second (FEV1), predicted percentage | genus.Subdoligranulum.id.2070              | Outlier-corrected |                      |             |              |             |                       | 0.093 |
| 1109 | Forced expiratory volume in 1-second (FEV1), predicted percentage | genus.Sutterella.id.2896                   | Raw               | -0.0104951070656175  | 0.03046461  | -0.344501611 | 0.736965293 |                       |       |
| 1110 | Forced expiratory volume in 1-second (FEV1), predicted percentage | genus.Sutterella.id.2896                   | Outlier-corrected | -0.0349134844291973  | 0.018156495 | -1.922919882 | 0.083405401 | rs7638039             | 0.018 |
| 1111 | Forced expiratory volume in 1-second (FEV1), predicted percentage | genus.Terrisporobacter.id.11348            | Raw               | -0.0362457188412583  | 0.005926709 | -6.115656886 | 0.003619736 |                       |       |
| 1112 | Forced expiratory volume in 1-second (FEV1), predicted percentage | genus.Terrisporobacter.id.11348            | Outlier-corrected |                      |             |              |             |                       | 0.994 |
| 1113 | Forced expiratory volume in 1-second (FEV1), predicted percentage | genus.Turicibacter.id.2162                 | Raw               | 0.0138011961061246   | 0.018054798 | 0.764406028  | 0.46419459  |                       |       |
| 1114 | Forced expiratory volume in 1-second (FEV1), predicted percentage | genus.Turicibacter.id.2162                 | Outlier-corrected |                      |             |              |             |                       | 0.501 |
| 1115 | Forced expiratory volume in 1-second (FEV1), predicted percentage | genus.Tyzzerella3.id.11335                 | Raw               | -0.0151704633852597  | 0.020388492 | -0.744069917 | 0.472429836 |                       |       |
| 1116 | Forced expiratory volume in 1-second (FEV1), predicted percentage | genus.Tyzzerella3.id.11335                 | Outlier-corrected | -0.0280370061318391  | 0.02004225  | -1.398895144 | 0.192086862 | rs67476743            | 0.002 |
| 1117 | Forced expiratory volume in 1-second (FEV1), predicted percentage | genus.Veillonella.id.2198                  | Raw               | 0.0398393734826901   | 0.023188952 | 1.718032523  | 0.129487274 |                       |       |
| 1118 | Forced expiratory volume in 1-second (FEV1), predicted percentage | genus.Veillonella.id.2198                  | Outlier-corrected |                      |             |              |             |                       | 0.318 |
| 1119 | Forced expiratory volume in 1-second (FEV1), predicted percentage | genus.Victivallis.id.2256                  | Raw               | 0.00852120632009686  | 0.011851647 | 0.718989189  | 0.490393009 |                       |       |
| 1120 | Forced expiratory volume in 1-second (FEV1), predicted percentage | genus.Victivallis.id.2256                  | Outlier-corrected |                      |             |              |             |                       | 0.399 |
| 1121 | Forced expiratory volume in 1-second (FEV1), predicted percentage | order.Actinomycetales.id.420               | Raw               | -0.03375748111515069 | 0.026679186 | -1.265311521 | 0.27444715  |                       |       |
| 1122 | Forced expiratory volume in 1-second (FEV1), predicted percentage | order.Actinomycetales.id.420               | Outlier-corrected |                      |             |              |             |                       | 0.284 |

|      | A                                                                 | B                                 | C                 | D                    | E           | F            | G           | H          | I     |
|------|-------------------------------------------------------------------|-----------------------------------|-------------------|----------------------|-------------|--------------|-------------|------------|-------|
| 1123 | Forced expiratory volume in 1-second (FEV1), predicted percentage | order.Bacillales.id.1674          | Raw               | 0.0278951815889229   | 0.015752856 | 1.77080155   | 0.119895884 |            |       |
| 1124 | Forced expiratory volume in 1-second (FEV1), predicted percentage | order.Bacillales.id.1674          | Outlier-corrected |                      |             |              |             |            | 0.181 |
| 1125 | Forced expiratory volume in 1-second (FEV1), predicted percentage | order.Bacteroidales.id.913        | Raw               | -0.0181546331674098  | 0.028004291 | -0.648280415 | 0.531406647 |            |       |
| 1126 | Forced expiratory volume in 1-second (FEV1), predicted percentage | order.Bacteroidales.id.913        | Outlier-corrected |                      |             |              |             |            | 0.347 |
| 1127 | Forced expiratory volume in 1-second (FEV1), predicted percentage | order.Bifidobacteriales.id.432    | Raw               | -0.0641356275559193  | 0.025494978 | -2.515618096 | 0.033005101 |            |       |
| 1128 | Forced expiratory volume in 1-second (FEV1), predicted percentage | order.Bifidobacteriales.id.432    | Outlier-corrected |                      |             |              |             |            | 0.436 |
| 1129 | Forced expiratory volume in 1-second (FEV1), predicted percentage | order.Burkholderiales.id.2874     | Raw               | 0.0516140237746891   | 0.036121542 | 1.428898671  | 0.186807837 |            |       |
| 1130 | Forced expiratory volume in 1-second (FEV1), predicted percentage | order.Burkholderiales.id.2874     | Outlier-corrected | 0.0238859411641917   | 0.02481254  | 0.962656016  | 0.363911277 | rs7638039  | 0.048 |
| 1131 | Forced expiratory volume in 1-second (FEV1), predicted percentage | order.Clostridiales.id.1863       | Raw               | 0.0657875263504224   | 0.027414475 | 2.399736845  | 0.033534739 |            |       |
| 1132 | Forced expiratory volume in 1-second (FEV1), predicted percentage | order.Clostridiales.id.1863       | Outlier-corrected |                      |             |              |             |            | 0.248 |
| 1133 | Forced expiratory volume in 1-second (FEV1), predicted percentage | order.Coriobacteriales.id.810     | Raw               | -0.00993048696771055 | 0.027303121 | -0.363712527 | 0.721919288 |            |       |
| 1134 | Forced expiratory volume in 1-second (FEV1), predicted percentage | order.Coriobacteriales.id.810     | Outlier-corrected |                      |             |              |             |            | 0.111 |
| 1135 | Forced expiratory volume in 1-second (FEV1), predicted percentage | order.Desulfovibrionales.id.3156  | Raw               | 0.0373293955131202   | 0.02660141  | 1.403286357  | 0.188124225 |            |       |
| 1136 | Forced expiratory volume in 1-second (FEV1), predicted percentage | order.Desulfovibrionales.id.3156  | Outlier-corrected |                      |             |              |             |            | 0.086 |
| 1137 | Forced expiratory volume in 1-second (FEV1), predicted percentage | order.Enterobacteriales.id.3468   | Raw               | 0.0429971625370977   | 0.04374317  | 0.982945731  | 0.363593744 |            |       |
| 1138 | Forced expiratory volume in 1-second (FEV1), predicted percentage | order.Enterobacteriales.id.3468   | Outlier-corrected | 0.0117710182821546   | 0.036519614 | 0.322320446  | 0.760250896 | rs2374342  | 0.03  |
| 1139 | Forced expiratory volume in 1-second (FEV1), predicted percentage | order.Erysipelotrichales.id.2148  | Raw               | 0.0312715752958063   | 0.020918306 | 1.494938249  | 0.160756442 |            |       |
| 1140 | Forced expiratory volume in 1-second (FEV1), predicted percentage | order.Erysipelotrichales.id.2148  | Outlier-corrected |                      |             |              |             |            | 0.637 |
| 1141 | Forced expiratory volume in 1-second (FEV1), predicted percentage | order.Gastranaerophilales.id.1591 | Raw               | -0.0100273537222517  | 0.01497992  | -0.669386337 | 0.522094902 |            |       |
| 1142 | Forced expiratory volume in 1-second (FEV1), predicted percentage | order.Gastranaerophilales.id.1591 | Outlier-corrected |                      |             |              |             |            | 0.463 |
| 1143 | Forced expiratory volume in 1-second (FEV1), predicted percentage | order.Lactobacillales.id.1800     | Raw               | -0.0151869728890131  | 0.01933221  | -0.785578717 | 0.446196665 |            |       |
| 1144 | Forced expiratory volume in 1-second (FEV1), predicted percentage | order.Lactobacillales.id.1800     | Outlier-corrected |                      |             |              |             |            | 0.541 |
| 1145 | Forced expiratory volume in 1-second (FEV1), predicted percentage | order.Methanobacteriales.id.120   | Raw               | 0.000510766671729285 | 0.017303609 | 0.029517928  | 0.977275472 |            |       |
| 1146 | Forced expiratory volume in 1-second (FEV1), predicted percentage | order.Methanobacteriales.id.120   | Outlier-corrected |                      |             |              |             |            | 0.112 |
| 1147 | Forced expiratory volume in 1-second (FEV1), predicted percentage | order.MollicutesRF9.id.11579      | Raw               | -0.0142245923526281  | 0.023658032 | -0.601258489 | 0.558855012 |            |       |
| 1148 | Forced expiratory volume in 1-second (FEV1), predicted percentage | order.MollicutesRF9.id.11579      | Outlier-corrected | -0.0268693260879544  | 0.01915983  | -1.40237811  | 0.188388112 | rs12566890 | 0.036 |
| 1149 | Forced expiratory volume in 1-second (FEV1), predicted percentage | order.NB1n.id.3953                | Raw               | 0.00573746597093834  | 0.015733608 | 0.36466308   | 0.721708327 |            |       |
| 1150 | Forced expiratory volume in 1-second (FEV1), predicted percentage | order.NB1n.id.3953                | Outlier-corrected |                      |             |              |             |            | 0.069 |
| 1151 | Forced expiratory volume in 1-second (FEV1), predicted percentage | order.Pasteurellales.id.3688      | Raw               | 0.0189446424586129   | 0.016698395 | 1.134518762  | 0.277063936 |            |       |
| 1152 | Forced expiratory volume in 1-second (FEV1), predicted percentage | order.Pasteurellales.id.3688      | Outlier-corrected |                      |             |              |             |            | 0.175 |
| 1153 | Forced expiratory volume in 1-second (FEV1), predicted percentage | order.Rhodospirillales.id.2667    | Raw               | 0.0270597566086946   | 0.01681631  | 1.609137613  | 0.133562004 |            |       |
| 1154 | Forced expiratory volume in 1-second (FEV1), predicted percentage | order.Rhodospirillales.id.2667    | Outlier-corrected |                      |             |              |             |            | 0.361 |
| 1155 | Forced expiratory volume in 1-second (FEV1), predicted percentage | order.Selenomonadales.id.2165     | Raw               | -0.0733937755213658  | 0.027180009 | -2.700285201 | 0.022302444 |            |       |
| 1156 | Forced expiratory volume in 1-second (FEV1), predicted percentage | order.Selenomonadales.id.2165     | Outlier-corrected |                      |             |              |             |            | 0.26  |
| 1157 | Forced expiratory volume in 1-second (FEV1), predicted percentage | order.Verrucomicrobiales.id.4030  | Raw               | 0.0265899529285025   | 0.022411219 | 1.186457246  | 0.262864485 |            |       |
| 1158 | Forced expiratory volume in 1-second (FEV1), predicted percentage | order.Verrucomicrobiales.id.4030  | Outlier-corrected |                      |             |              |             |            | 0.211 |
| 1159 | Forced expiratory volume in 1-second (FEV1), predicted percentage | order.Victivallales.id.2254       | Raw               | -0.0147450016119527  | 0.017938827 | -0.82196019  | 0.438196307 |            |       |
| 1160 | Forced expiratory volume in 1-second (FEV1), predicted percentage | order.Victivallales.id.2254       | Outlier-corrected |                      |             |              |             |            | 0.157 |
| 1161 | Forced expiratory volume in 1-second (FEV1), predicted percentage | phylum.Actinobacteria.id.400      | Raw               | -0.0120694903333914  | 0.030893201 | -0.39068436  | 0.702357702 |            |       |
| 1162 | Forced expiratory volume in 1-second (FEV1), predicted percentage | phylum.Actinobacteria.id.400      | Outlier-corrected |                      |             |              |             | NA         | 0.022 |
| 1163 | Forced expiratory volume in 1-second (FEV1), predicted percentage | phylum.Bacteroidetes.id.905       | Raw               | 0.0064140698450985   | 0.028959174 | 0.221486627  | 0.830262487 |            |       |
| 1164 | Forced expiratory volume in 1-second (FEV1), predicted percentage | phylum.Bacteroidetes.id.905       | Outlier-corrected |                      |             |              |             |            | 0.504 |
| 1165 | Forced expiratory volume in 1-second (FEV1), predicted percentage | phylum.Cyanobacteria.id.1500      | Raw               | 0.0106081223597428   | 0.017411832 | 0.609247907  | 0.561604644 |            |       |
| 1166 | Forced expiratory volume in 1-second (FEV1), predicted percentage | phylum.Cyanobacteria.id.1500      | Outlier-corrected |                      |             |              |             |            | 0.431 |
| 1167 | Forced expiratory volume in 1-second (FEV1), predicted percentage | phylum.Euryarchaeota.id.55        | Raw               | -0.0151702954271273  | 0.007798213 | -1.945355292 | 0.080364715 |            |       |
| 1168 | Forced expiratory volume in 1-second (FEV1), predicted percentage | phylum.Euryarchaeota.id.55        | Outlier-corrected |                      |             |              |             |            | 0.932 |
| 1169 | Forced expiratory volume in 1-second (FEV1), predicted percentage | phylum.Firmicutes.id.1672         | Raw               | -0.00858022724961504 | 0.023451866 | -0.365865446 | 0.719573904 |            |       |
| 1170 | Forced expiratory volume in 1-second (FEV1), predicted percentage | phylum.Firmicutes.id.1672         | Outlier-corrected |                      |             |              |             |            | 0.147 |
| 1171 | Forced expiratory volume in 1-second (FEV1), predicted percentage | phylum.Lentisphaerae.id.2238      | Raw               | -0.0164419971038429  | 0.016074818 | -1.022841868 | 0.336314086 |            |       |
| 1172 | Forced expiratory volume in 1-second (FEV1), predicted percentage | phylum.Lentisphaerae.id.2238      | Outlier-corrected |                      |             |              |             |            | 0.214 |
| 1173 | Forced expiratory volume in 1-second (FEV1), predicted percentage | phylum.Proteobacteria.id.2375     | Raw               | 0.0418149554644365   | 0.046651448 | 0.896327073  | 0.391144788 |            |       |

|      | A                                                                 | B                                       | C                 | D                    | E           | F            | G           | H                    | I      |
|------|-------------------------------------------------------------------|-----------------------------------------|-------------------|----------------------|-------------|--------------|-------------|----------------------|--------|
| 1174 | Forced expiratory volume in 1-second (FEV1), predicted percentage | phylum.Proteobacteria.id.2375           | Outlier-corrected | 0.0439226286424648   | 0.032387809 | 1.356146969  | 0.212086002 | rs11715072,rs3890996 | <0.001 |
| 1175 | Forced expiratory volume in 1-second (FEV1), predicted percentage | phylum.Tenericutes.id.3919              | Raw               | 0.00716369481439416  | 0.027148608 | 0.263869695  | 0.796758311 |                      |        |
| 1176 | Forced expiratory volume in 1-second (FEV1), predicted percentage | phylum.Tenericutes.id.3919              | Outlier-corrected | -0.00595117343756663 | 0.023804116 | -0.25000607  | 0.807643641 | rs12566890           | 0.026  |
| 1177 | Forced expiratory volume in 1-second (FEV1), predicted percentage | phylum.Verrucomicrobia.id.3982          | Raw               | -0.00666332794051785 | 0.026639982 | -0.250125091 | 0.807100511 |                      |        |
| 1178 | Forced expiratory volume in 1-second (FEV1), predicted percentage | phylum.Verrucomicrobia.id.3982          | Outlier-corrected |                      |             |              |             | NA                   | 0.026  |
| 1179 | COPD                                                              | class.Actinobacteria.id.419             | Raw               | -0.0182545549153829  | 0.07285876  | -0.250547152 | 0.806402554 |                      |        |
| 1180 | COPD                                                              | class.Actinobacteria.id.419             | Outlier-corrected |                      |             |              |             |                      | 0.162  |
| 1181 | COPD                                                              | class.Alphaproteobacteria.id.2379       | Raw               | 0.0650938354770496   | 0.065343612 | 0.996177488  | 0.364900136 |                      |        |
| 1182 | COPD                                                              | class.Alphaproteobacteria.id.2379       | Outlier-corrected |                      |             |              |             |                      | 0.488  |
| 1183 | COPD                                                              | class.Bacilli.id.1673                   | Raw               | 0.0107752284919282   | 0.072707288 | 0.148200116  | 0.884036489 |                      |        |
| 1184 | COPD                                                              | class.Bacilli.id.1673                   | Outlier-corrected | -0.0454164410217203  | 0.062069287 | -0.731705539 | 0.475625428 | rs7666190            | 0.023  |
| 1185 | COPD                                                              | class.Bacteroidia.id.912                | Raw               | -0.161636111694536   | 0.081383577 | -1.986102336 | 0.072508725 |                      |        |
| 1186 | COPD                                                              | class.Bacteroidia.id.912                | Outlier-corrected |                      |             |              |             |                      | 0.198  |
| 1187 | COPD                                                              | class.Betaproteobacteria.id.2867        | Raw               | -0.0445951489649243  | 0.085944408 | -0.518883662 | 0.616358243 |                      |        |
| 1188 | COPD                                                              | class.Betaproteobacteria.id.2867        | Outlier-corrected |                      |             |              |             |                      | 0.186  |
| 1189 | COPD                                                              | class.Clostridia.id.1859                | Raw               | -0.131799582922452   | 0.107246311 | -1.228942817 | 0.25025585  |                      |        |
| 1190 | COPD                                                              | class.Clostridia.id.1859                | Outlier-corrected | -0.031362435801099   | 0.100241471 | -0.31286887  | 0.762380943 | rs6815608            | 0.024  |
| 1191 | COPD                                                              | class.Coriobacteriia.id.809             | Raw               | 0.0336052917205119   | 0.058495909 | 0.574489604  | 0.575443473 |                      |        |
| 1192 | COPD                                                              | class.Coriobacteriia.id.809             | Outlier-corrected |                      |             |              |             |                      | 0.586  |
| 1193 | COPD                                                              | class.Deltaproteobacteria.id.3087       | Raw               | -0.0425963728632775  | 0.095177443 | -0.447546935 | 0.663165436 |                      |        |
| 1194 | COPD                                                              | class.Deltaproteobacteria.id.3087       | Outlier-corrected |                      |             |              |             | NA                   | 0.021  |
| 1195 | COPD                                                              | class.Erysipelotrichia.id.2147          | Raw               | -0.0315673269978064  | 0.079056647 | -0.399300098 | 0.696687203 |                      |        |
| 1196 | COPD                                                              | class.Erysipelotrichia.id.2147          | Outlier-corrected |                      |             |              |             |                      | 0.192  |
| 1197 | COPD                                                              | class.Gammaproteobacteria.id.3303       | Raw               | -0.0331529797578438  | 0.071260239 | -0.465238123 | 0.658167412 |                      |        |
| 1198 | COPD                                                              | class.Gammaproteobacteria.id.3303       | Outlier-corrected |                      |             |              |             |                      | 0.664  |
| 1199 | COPD                                                              | class.Lentisphaeria.id.2250             | Raw               | 0.0164150803100757   | 0.044548024 | 0.368480547  | 0.723406341 |                      |        |
| 1200 | COPD                                                              | class.Lentisphaeria.id.2250             | Outlier-corrected |                      |             |              |             |                      | 0.404  |
| 1201 | COPD                                                              | class.Melainabacteria.id.1589           | Raw               | 0.0198970725901511   | 0.032754331 | 0.607463871  | 0.558556486 |                      |        |
| 1202 | COPD                                                              | class.Melainabacteria.id.1589           | Outlier-corrected |                      |             |              |             |                      | 0.844  |
| 1203 | COPD                                                              | class.Methanobacteria.id.119            | Raw               | -0.0504575789989376  | 0.056572056 | -0.891917014 | 0.402054922 |                      |        |
| 1204 | COPD                                                              | class.Methanobacteria.id.119            | Outlier-corrected |                      |             |              |             |                      | 0.079  |
| 1205 | COPD                                                              | class.Mollicutes.id.3920                | Raw               | -0.094422417030693   | 0.054607772 | -1.729102165 | 0.111715258 |                      |        |
| 1206 | COPD                                                              | class.Mollicutes.id.3920                | Outlier-corrected |                      |             |              |             |                      | 0.458  |
| 1207 | COPD                                                              | class.Negativicutes.id.2164             | Raw               | -0.0596666756554796  | 0.059185075 | -1.008137191 | 0.335050477 |                      |        |
| 1208 | COPD                                                              | class.Negativicutes.id.2164             | Outlier-corrected |                      |             |              |             |                      | 0.7    |
| 1209 | COPD                                                              | class.Verrucomicrobiae.id.4029          | Raw               | 0.0236692911612742   | 0.075220219 | 0.314666609  | 0.759482061 |                      |        |
| 1210 | COPD                                                              | class.Verrucomicrobiae.id.4029          | Outlier-corrected |                      |             |              |             |                      | 0.074  |
| 1211 | COPD                                                              | family.Acidaminococcaceae.id.2166       | Raw               | -0.133590510480937   | 0.117824091 | -1.133813205 | 0.300133343 |                      |        |
| 1212 | COPD                                                              | family.Acidaminococcaceae.id.2166       | Outlier-corrected | 0.00153803017632137  | 0.064066627 | 0.024006729  | 0.98177587  | rs45497800           | 0.009  |
| 1213 | COPD                                                              | family.Actinomycetaceae.id.421          | Raw               | -0.0670875619928175  | 0.105143679 | -0.638056065 | 0.568804803 |                      |        |
| 1214 | COPD                                                              | family.Actinomycetaceae.id.421          | Outlier-corrected |                      |             |              |             |                      | 0.243  |
| 1215 | COPD                                                              | family.Alcaligenaceae.id.2875           | Raw               | -0.0272070786395997  | 0.077924499 | -0.349146661 | 0.735008868 |                      |        |
| 1216 | COPD                                                              | family.Alcaligenaceae.id.2875           | Outlier-corrected |                      |             |              |             |                      | 0.381  |
| 1217 | COPD                                                              | family.Bacteroidaceae.id.917            | Raw               | 0.0991935568362764   | 0.109338254 | 0.907217311  | 0.394449166 |                      |        |
| 1218 | COPD                                                              | family.Bacteroidaceae.id.917            | Outlier-corrected |                      |             |              |             |                      | 0.086  |
| 1219 | COPD                                                              | family.BacteroidalesS24.7group.id.11173 | Raw               | 0.0475557520432883   | 0.041533774 | 1.144989921  | 0.28984776  |                      |        |
| 1220 | COPD                                                              | family.BacteroidalesS24.7group.id.11173 | Outlier-corrected |                      |             |              |             |                      | 0.744  |
| 1221 | COPD                                                              | family.Bifidobacteriaceae.id.433        | Raw               | -0.0572775864820256  | 0.070802777 | -0.808973724 | 0.439391702 |                      |        |
| 1222 | COPD                                                              | family.Bifidobacteriaceae.id.433        | Outlier-corrected |                      |             |              |             |                      | 0.408  |
| 1223 | COPD                                                              | family.Christensenellaceae.id.1866      | Raw               | -0.0193736180230822  | 0.053977937 | -0.358917345 | 0.727119205 |                      |        |
| 1224 | COPD                                                              | family.Christensenellaceae.id.1866      | Outlier-corrected |                      |             |              |             |                      | 0.484  |

|      | A    | B                                           | C                 | D                    | E           | F            | G           | H          | I     |
|------|------|---------------------------------------------|-------------------|----------------------|-------------|--------------|-------------|------------|-------|
| 1225 | COPD | family.Clostridiaceae1.id.1869              | Raw               | 0.0335538063842545   | 0.105957626 | 0.316671934  | 0.758714502 |            |       |
| 1226 | COPD | family.Clostridiaceae1.id.1869              | Outlier-corrected |                      |             |              |             | NA         | 0.005 |
| 1227 | COPD | family.ClostridialesvadinBB60group.id.11286 | Raw               | -0.0138612160528805  | 0.042094207 | -0.329290346 | 0.746810848 |            |       |
| 1228 | COPD | family.ClostridialesvadinBB60group.id.11286 | Outlier-corrected |                      |             |              |             |            | 0.607 |
| 1229 | COPD | family.Coriobacteriaceae.id.811             | Raw               | 0.0336052917205119   | 0.058495909 | 0.574489604  | 0.575443473 |            |       |
| 1230 | COPD | family.Coriobacteriaceae.id.811             | Outlier-corrected |                      |             |              |             |            | 0.582 |
| 1231 | COPD | family.Defluviitaleaceae.id.1924            | Raw               | -0.0333310764527946  | 0.057447889 | -0.580196715 | 0.574621727 |            |       |
| 1232 | COPD | family.Defluviitaleaceae.id.1924            | Outlier-corrected |                      |             |              |             |            | 0.234 |
| 1233 | COPD | family.Desulfovibrionaceae.id.3169          | Raw               | 0.0613125960271111   | 0.096076027 | 0.638167477  | 0.541197386 |            |       |
| 1234 | COPD | family.Desulfovibrionaceae.id.3169          | Outlier-corrected |                      |             |              |             |            | 0.086 |
| 1235 | COPD | family.Enterobacteriaceae.id.3469           | Raw               | 0.0057807848078939   | 0.085288009 | 0.067779573  | 0.948163371 |            |       |
| 1236 | COPD | family.Enterobacteriaceae.id.3469           | Outlier-corrected |                      |             |              |             |            | 0.366 |
| 1237 | COPD | family.Erysipelotrichaceae.id.2149          | Raw               | -0.0315673269978064  | 0.079056647 | -0.399300098 | 0.696687203 |            |       |
| 1238 | COPD | family.Erysipelotrichaceae.id.2149          | Outlier-corrected |                      |             |              |             |            | 0.175 |
| 1239 | COPD | family.FamilyXI.id.1936                     | Raw               | 0.0626671238995544   | 0.035522405 | 1.76415768   | 0.121065087 |            |       |
| 1240 | COPD | family.FamilyXI.id.1936                     | Outlier-corrected |                      |             |              |             |            | 0.422 |
| 1241 | COPD | family.FamilyXIII.id.1957                   | Raw               | -0.287416277958166   | 0.059109616 | -4.86242844  | 0.002815905 |            |       |
| 1242 | COPD | family.FamilyXIII.id.1957                   | Outlier-corrected |                      |             |              |             |            | 0.888 |
| 1243 | COPD | family.Lachnospiraceae.id.1987              | Raw               | -0.00883523851645136 | 0.057509069 | -0.15363209  | 0.879947646 |            |       |
| 1244 | COPD | family.Lachnospiraceae.id.1987              | Outlier-corrected |                      |             |              |             |            | 0.597 |
| 1245 | COPD | family.Lactobacillaceae.id.1836             | Raw               | 0.0243320904850978   | 0.07636977  | 0.318608926  | 0.760822158 |            |       |
| 1246 | COPD | family.Lactobacillaceae.id.1836             | Outlier-corrected |                      |             |              |             |            | 0.05  |
| 1247 | COPD | family.Methanobacteriaceae.id.121           | Raw               | -0.0504575789989376  | 0.056572056 | -0.891917014 | 0.402054922 |            |       |
| 1248 | COPD | family.Methanobacteriaceae.id.121           | Outlier-corrected |                      |             |              |             |            | 0.072 |
| 1249 | COPD | family.Oxalobacteraceae.id.2966             | Raw               | 0.0392043816490094   | 0.049146591 | 0.797702967  | 0.439371388 |            |       |
| 1250 | COPD | family.Oxalobacteraceae.id.2966             | Outlier-corrected | 0.0157386906316822   | 0.042706737 | 0.368529455  | 0.718897933 | rs12002250 | 0.008 |
| 1251 | COPD | family.Pasteurellaceae.id.3689              | Raw               | -0.0529645332287137  | 0.059633763 | -0.88816352  | 0.391907827 |            |       |
| 1252 | COPD | family.Pasteurellaceae.id.3689              | Outlier-corrected |                      |             |              |             | NA         | 0.013 |
| 1253 | COPD | family.Peptococcaceae.id.2024               | Raw               | 0.0362407033840495   | 0.044369736 | 0.816788798  | 0.437693997 |            |       |
| 1254 | COPD | family.Peptococcaceae.id.2024               | Outlier-corrected |                      |             |              |             |            | 0.774 |
| 1255 | COPD | family.Peptostreptococcaceae.id.2042        | Raw               | 0.10196906980181     | 0.052284695 | 1.950266129  | 0.074893016 |            |       |
| 1256 | COPD | family.Peptostreptococcaceae.id.2042        | Outlier-corrected |                      |             |              |             |            | 0.444 |
| 1257 | COPD | family.Porphyromonadaceae.id.943            | Raw               | -0.0199440711783506  | 0.121157164 | -0.164613222 | 0.873331703 |            |       |
| 1258 | COPD | family.Porphyromonadaceae.id.943            | Outlier-corrected | 0.0971839152785439   | 0.084014955 | 1.156745423  | 0.285322078 | rs6953849  | 0.035 |
| 1259 | COPD | family.Prevotellaceae.id.960                | Raw               | -0.0346428127007303  | 0.037472208 | -0.924493491 | 0.369863746 |            |       |
| 1260 | COPD | family.Prevotellaceae.id.960                | Outlier-corrected |                      |             |              |             |            | 0.95  |
| 1261 | COPD | family.Rhodospirillaceae.id.2717            | Raw               | -0.00109778495428885 | 0.035339652 | -0.031063831 | 0.975690489 |            |       |
| 1262 | COPD | family.Rhodospirillaceae.id.2717            | Outlier-corrected |                      |             |              |             |            | 0.756 |
| 1263 | COPD | family.Rikenellaceae.id.967                 | Raw               | -0.0120400531267154  | 0.075009975 | -0.160512693 | 0.874618926 |            |       |
| 1264 | COPD | family.Rikenellaceae.id.967                 | Outlier-corrected | 0.0307093773531049   | 0.066180248 | 0.464026323  | 0.64976186  | rs4264350  | 0.04  |
| 1265 | COPD | family.Ruminococcaceae.id.2050              | Raw               | -0.0399219381915221  | 0.052345896 | -0.762656503 | 0.465186633 |            |       |
| 1266 | COPD | family.Ruminococcaceae.id.2050              | Outlier-corrected |                      |             |              |             |            | 0.777 |
| 1267 | COPD | family.Streptococcaceae.id.1850             | Raw               | 0.112417954038091    | 0.082110916 | 1.369098777  | 0.204161207 |            |       |
| 1268 | COPD | family.Streptococcaceae.id.1850             | Outlier-corrected |                      |             |              |             |            | 0.239 |
| 1269 | COPD | family.Veillonellaceae.id.2172              | Raw               | -0.113416600256178   | 0.056883259 | -1.993848509 | 0.062464536 |            |       |
| 1270 | COPD | family.Veillonellaceae.id.2172              | Outlier-corrected |                      |             |              |             |            | 0.094 |
| 1271 | COPD | family.Verrucomicrobiaceae.id.4036          | Raw               | 0.0235977963087971   | 0.075241046 | 0.313629298  | 0.760246868 |            |       |
| 1272 | COPD | family.Verrucomicrobiaceae.id.4036          | Outlier-corrected |                      |             |              |             |            | 0.088 |
| 1273 | COPD | family.Victivallaceae.id.2255               | Raw               | 0.0597662533327569   | 0.021435957 | 2.788130816  | 0.019181188 |            |       |
| 1274 | COPD | family.Victivallaceae.id.2255               | Outlier-corrected |                      |             |              |             |            | 0.938 |
| 1275 | COPD | genus..Clostridiuminnocuumgroup.id.14397    | Raw               | -0.0868293756776915  | 0.043588819 | -1.992010285 | 0.086634078 |            |       |

|      | A    | B                                                 | C                 | D                     | E           | F            | G           | H                   | I     |
|------|------|---------------------------------------------------|-------------------|-----------------------|-------------|--------------|-------------|---------------------|-------|
| 1276 | COPD | genus..Clostridiuminnocuumgroup.id.14397          | Outlier-corrected |                       |             |              |             |                     | 0.324 |
| 1277 | COPD | genus..Eubacteriumbrachygroup.id.11296            | Raw               | 0.000563254975002975  | 0.051223907 | 0.010995939  | 0.991466574 |                     |       |
| 1278 | COPD | genus..Eubacteriumbrachygroup.id.11296            | Outlier-corrected |                       |             |              |             |                     | 0.05  |
| 1279 | COPD | genus..Eubacteriumcoprostanoligenesgroup.id.11375 | Raw               | -0.0721067415379045   | 0.079062779 | -0.912018814 | 0.381311959 |                     |       |
| 1280 | COPD | genus..Eubacteriumcoprostanoligenesgroup.id.11375 | Outlier-corrected |                       |             |              |             |                     | 0.222 |
| 1281 | COPD | genus..Eubacteriumeligensgroup.id.14372           | Raw               | -0.095407736085505    | 0.102925633 | -0.926957977 | 0.396489751 |                     |       |
| 1282 | COPD | genus..Eubacteriumeligensgroup.id.14372           | Outlier-corrected |                       |             |              |             |                     | 0.285 |
| 1283 | COPD | genus..Eubacteriumfissicatenagroup.id.14373       | Raw               | -0.00284139422570063  | 0.042525955 | -0.06681553  | 0.948368215 |                     |       |
| 1284 | COPD | genus..Eubacteriumfissicatenagroup.id.14373       | Outlier-corrected |                       |             |              |             |                     | 0.298 |
| 1285 | COPD | genus..Eubacteriumhalliigroup.id.11338            | Raw               | 0.0116113057303441    | 0.082176096 | 0.14129785   | 0.88980075  |                     |       |
| 1286 | COPD | genus..Eubacteriumhalliigroup.id.11338            | Outlier-corrected | 0.0512641458689585    | 0.072908466 | 0.703130218  | 0.495390489 | rs949971            | 0.005 |
| 1287 | COPD | genus..Eubacteriumnodatumgroup.id.11297           | Raw               | -0.0304919006987075   | 0.028984498 | -1.052007194 | 0.317553012 |                     |       |
| 1288 | COPD | genus..Eubacteriumnodatumgroup.id.11297           | Outlier-corrected |                       |             |              |             |                     | 0.577 |
| 1289 | COPD | genus..Eubacteriumoxidoreducensgroup.id.11339     | Raw               | 0.0519889635599102    | 0.060774313 | 0.855443052  | 0.440520736 |                     |       |
| 1290 | COPD | genus..Eubacteriumoxidoreducensgroup.id.11339     | Outlier-corrected |                       |             |              |             |                     | 0.383 |
| 1291 | COPD | genus..Eubacteriumrectalegroup.id.14374           | Raw               | -0.0253391725683957   | 0.082366017 | -0.307641108 | 0.767306911 |                     |       |
| 1292 | COPD | genus..Eubacteriumrectalegroup.id.14374           | Outlier-corrected |                       |             |              |             |                     | 0.402 |
| 1293 | COPD | genus..Eubacteriumruminantiumgroup.id.11340       | Raw               | 0.0208258726207496    | 0.050838127 | 0.409650664  | 0.687177801 |                     |       |
| 1294 | COPD | genus..Eubacteriumruminantiumgroup.id.11340       | Outlier-corrected |                       |             |              |             | NA                  | 0.007 |
| 1295 | COPD | genus..Eubacteriumventriosumgroup.id.11341        | Raw               | 0.0451243594341728    | 0.069837968 | 0.64612933   | 0.528645546 |                     |       |
| 1296 | COPD | genus..Eubacteriumventriosumgroup.id.11341        | Outlier-corrected |                       |             |              |             |                     | 0.122 |
| 1297 | COPD | genus..Eubacteriumxylanophilumgroup.id.14375      | Raw               | 0.0867330731937463    | 0.076134928 | 1.139202141  | 0.28757877  |                     |       |
| 1298 | COPD | genus..Eubacteriumxylanophilumgroup.id.14375      | Outlier-corrected |                       |             |              |             |                     | 0.175 |
| 1299 | COPD | genus..Ruminococcusgavreauigroup.id.11342         | Raw               | -0.0550425650403985   | 0.07487652  | -0.73511115  | 0.479156963 |                     |       |
| 1300 | COPD | genus..Ruminococcusgavreauigroup.id.11342         | Outlier-corrected |                       |             |              |             |                     | 0.129 |
| 1301 | COPD | genus..Ruminococcusgnavusgroup.id.14376           | Raw               | -0.0699245781898941   | 0.047289928 | -1.478635743 | 0.17003172  |                     |       |
| 1302 | COPD | genus..Ruminococcusgnavusgroup.id.14376           | Outlier-corrected |                       |             |              |             |                     | 0.265 |
| 1303 | COPD | genus..Ruminococcusstorquesgroup.id.14377         | Raw               | 0.0654542834180117    | 0.075958893 | 0.86170665   | 0.421946354 |                     |       |
| 1304 | COPD | genus..Ruminococcusstorquesgroup.id.14377         | Outlier-corrected |                       |             |              |             |                     | 0.708 |
| 1305 | COPD | genus.Actinomyces.id.423                          | Raw               | -0.113211536256731    | 0.097991527 | -1.155319643 | 0.29188606  |                     |       |
| 1306 | COPD | genus.Actinomyces.id.423                          | Outlier-corrected | -0.182986717349198    | 0.095573574 | -1.914616242 | 0.113711004 | rs7915461           | 0.011 |
| 1307 | COPD | genus.Adlercreutzia.id.812                        | Raw               | 0.00102894899385838   | 0.062378076 | 0.016495363  | 0.987299511 |                     |       |
| 1308 | COPD | genus.Adlercreutzia.id.812                        | Outlier-corrected |                       |             |              |             |                     | 0.378 |
| 1309 | COPD | genus.Akkermansia.id.4037                         | Raw               | 0.023669043158907     | 0.075210619 | 0.314703474  | 0.759454886 |                     |       |
| 1310 | COPD | genus.Akkermansia.id.4037                         | Outlier-corrected |                       |             |              |             |                     | 0.07  |
| 1311 | COPD | genus.Alistipes.id.968                            | Raw               | -0.07485050948974     | 0.073333836 | -1.020681764 | 0.329328939 |                     |       |
| 1312 | COPD | genus.Alistipes.id.968                            | Outlier-corrected |                       |             |              |             |                     | 0.464 |
| 1313 | COPD | genus.Allisonella.id.2174                         | Raw               | -0.0437791616228147   | 0.040687999 | -1.075972331 | 0.317619732 |                     |       |
| 1314 | COPD | genus.Allisonella.id.2174                         | Outlier-corrected |                       |             |              |             |                     | 0.241 |
| 1315 | COPD | genus.Alloprevotella.id.961                       | Raw               | 0.00201648010819836   | 0.019466787 | 0.103585668  | 0.922483929 |                     |       |
| 1316 | COPD | genus.Alloprevotella.id.961                       | Outlier-corrected |                       |             |              |             |                     | 0.942 |
| 1317 | COPD | genus.Anaerofilum.id.2053                         | Raw               | -0.000826155620464721 | 0.04274971  | -0.019325409 | 0.985003171 |                     |       |
| 1318 | COPD | genus.Anaerofilum.id.2053                         | Outlier-corrected |                       |             |              |             |                     | 0.362 |
| 1319 | COPD | genus.Anaerostipes.id.1991                        | Raw               | -0.120921350740396    | 0.088455808 | -1.367025566 | 0.196680321 |                     |       |
| 1320 | COPD | genus.Anaerostipes.id.1991                        | Outlier-corrected |                       |             |              |             |                     | 0.056 |
| 1321 | COPD | genus.Anaerotruncus.id.2054                       | Raw               | 0.0865951167645484    | 0.105239378 | 0.822839493  | 0.426648698 |                     |       |
| 1322 | COPD | genus.Anaerotruncus.id.2054                       | Outlier-corrected | 0.0799106860036019    | 0.073246119 | 1.090988668  | 0.300866651 | rs7155595,rs8005030 | 0.001 |
| 1323 | COPD | genus.Bacteroides.id.918                          | Raw               | 0.0991935568362764    | 0.109338254 | 0.907217311  | 0.394449166 |                     |       |
| 1324 | COPD | genus.Bacteroides.id.918                          | Outlier-corrected |                       |             |              |             |                     | 0.081 |
| 1325 | COPD | genus.Barnesiella.id.944                          | Raw               | -0.124025113417781    | 0.05515428  | -2.248694282 | 0.045995073 |                     |       |
| 1326 | COPD | genus.Barnesiella.id.944                          | Outlier-corrected |                       |             |              |             |                     | 0.675 |

|      | A    | B                                          | C                 | D                    | E           | F            | G           | H  | I     |
|------|------|--------------------------------------------|-------------------|----------------------|-------------|--------------|-------------|----|-------|
| 1327 | COPD | genus.Bifidobacterium.id.436               | Raw               | 0.00758260271374162  | 0.083771098 | 0.090515737  | 0.929664774 |    |       |
| 1328 | COPD | genus.Bifidobacterium.id.436               | Outlier-corrected |                      |             |              |             |    | 0.063 |
| 1329 | COPD | genus.Bilophila.id.3170                    | Raw               | 0.03846665188225     | 0.079256497 | 0.485343833  | 0.636172671 |    |       |
| 1330 | COPD | genus.Bilophila.id.3170                    | Outlier-corrected |                      |             |              |             | NA | 0.047 |
| 1331 | COPD | genus.Blautia.id.1992                      | Raw               | -0.0735550284574767  | 0.06908588  | -1.06468975  | 0.309829283 |    |       |
| 1332 | COPD | genus.Blautia.id.1992                      | Outlier-corrected |                      |             |              |             |    | 0.422 |
| 1333 | COPD | genus.Butyricicoccus.id.2055               | Raw               | -0.10574858084294    | 0.0787698   | -1.342501584 | 0.221336194 |    |       |
| 1334 | COPD | genus.Butyricicoccus.id.2055               | Outlier-corrected |                      |             |              |             |    | 0.362 |
| 1335 | COPD | genus.Butyricimonas.id.945                 | Raw               | 0.115409096661533    | 0.058476509 | 1.97359757   | 0.071904193 |    |       |
| 1336 | COPD | genus.Butyricimonas.id.945                 | Outlier-corrected |                      |             |              |             |    | 0.349 |
| 1337 | COPD | genus.Butyrivibrio.id.1993                 | Raw               | 0.0471461078276036   | 0.026147042 | 1.803114419  | 0.092929288 |    |       |
| 1338 | COPD | genus.Butyrivibrio.id.1993                 | Outlier-corrected |                      |             |              |             |    | 0.507 |
| 1339 | COPD | genus.CandidatusSoleaferrea.id.11350       | Raw               | -0.00762747058840193 | 0.063066736 | -0.120942846 | 0.906718802 |    |       |
| 1340 | COPD | genus.CandidatusSoleaferrea.id.11350       | Outlier-corrected |                      |             |              |             |    | 0.055 |
| 1341 | COPD | genus.Catenibacterium.id.2153              | Raw               | -0.00759270037479844 | 0.031817327 | -0.238634139 | 0.82676146  |    |       |
| 1342 | COPD | genus.Catenibacterium.id.2153              | Outlier-corrected |                      |             |              |             |    | 0.81  |
| 1343 | COPD | genus.ChristensenellaceaeR.7group.id.11283 | Raw               | -0.121808157090069   | 0.126197096 | -0.965221557 | 0.366587609 |    |       |
| 1344 | COPD | genus.ChristensenellaceaeR.7group.id.11283 | Outlier-corrected |                      |             |              |             |    | 0.056 |
| 1345 | COPD | genus.Clostridiumsensustricto1.id.1873     | Raw               | 0.0735519274074947   | 0.100345606 | 0.732986028  | 0.496470154 |    |       |
| 1346 | COPD | genus.Clostridiumsensustricto1.id.1873     | Outlier-corrected |                      |             |              |             |    | 0.104 |
| 1347 | COPD | genus.Collinsella.id.815                   | Raw               | -0.183172325603776   | 0.059779097 | -3.064153433 | 0.01548467  |    |       |
| 1348 | COPD | genus.Collinsella.id.815                   | Outlier-corrected |                      |             |              |             |    | 0.789 |
| 1349 | COPD | genus.Coprobacter.id.949                   | Raw               | -0.0123302942500343  | 0.04169427  | -0.295731144 | 0.773485161 |    |       |
| 1350 | COPD | genus.Coprobacter.id.949                   | Outlier-corrected |                      |             |              |             |    | 0.562 |
| 1351 | COPD | genus.Coprococcus1.id.11301                | Raw               | -0.0656331480233551  | 0.082258041 | -0.797893396 | 0.441817024 |    |       |
| 1352 | COPD | genus.Coprococcus1.id.11301                | Outlier-corrected |                      |             |              |             |    | 0.05  |
| 1353 | COPD | genus.Coprococcus2.id.11302                | Raw               | -0.0976449325953627  | 0.047564978 | -2.052874564 | 0.079193671 |    |       |
| 1354 | COPD | genus.Coprococcus2.id.11302                | Outlier-corrected |                      |             |              |             |    | 0.859 |
| 1355 | COPD | genus.Coprococcus3.id.11303                | Raw               | 0.0207379964191356   | 0.082798772 | 0.250462609  | 0.80942185  |    |       |
| 1356 | COPD | genus.Coprococcus3.id.11303                | Outlier-corrected |                      |             |              |             |    | 0.437 |
| 1357 | COPD | genus.DefluviitaleaceaeUCG011.id.11287     | Raw               | 0.00773390937222634  | 0.070836778 | 0.109179293  | 0.915749209 |    |       |
| 1358 | COPD | genus.DefluviitaleaceaeUCG011.id.11287     | Outlier-corrected |                      |             |              |             |    | 0.122 |
| 1359 | COPD | genus.Desulfovibrio.id.3173                | Raw               | 0.0439969185440855   | 0.056619278 | 0.777066052  | 0.457057177 |    |       |
| 1360 | COPD | genus.Desulfovibrio.id.3173                | Outlier-corrected |                      |             |              |             |    | 0.41  |
| 1361 | COPD | genus.Dialister.id.2183                    | Raw               | 0.0574976385117954   | 0.068671941 | 0.837279944  | 0.421994231 |    |       |
| 1362 | COPD | genus.Dialister.id.2183                    | Outlier-corrected |                      |             |              |             |    | 0.216 |
| 1363 | COPD | genus.Dorea.id.1997                        | Raw               | -0.0399816279744493  | 0.109291653 | -0.365825082 | 0.72294646  |    |       |
| 1364 | COPD | genus.Dorea.id.1997                        | Outlier-corrected |                      |             |              |             |    | 0.053 |
| 1365 | COPD | genus.Eggerthella.id.819                   | Raw               | -0.055630921719663   | 0.055464885 | -1.002993543 | 0.34523284  |    |       |
| 1366 | COPD | genus.Eggerthella.id.819                   | Outlier-corrected |                      |             |              |             |    | 0.132 |
| 1367 | COPD | genus.Eisenbergiella.id.11304              | Raw               | 0.0216227750165999   | 0.054923728 | 0.393687313  | 0.702075475 |    |       |
| 1368 | COPD | genus.Eisenbergiella.id.11304              | Outlier-corrected |                      |             |              |             |    | 0.051 |
| 1369 | COPD | genus.Enterorhabdus.id.820                 | Raw               | 0.0934754804387166   | 0.10400049  | 0.898798465  | 0.409952934 |    |       |
| 1370 | COPD | genus.Enterorhabdus.id.820                 | Outlier-corrected |                      |             |              |             |    | 0.052 |
| 1371 | COPD | genus.Erysipelatoclostridium.id.11381      | Raw               | 0.0104216421249923   | 0.050654452 | 0.205739906  | 0.839955764 |    |       |
| 1372 | COPD | genus.Erysipelatoclostridium.id.11381      | Outlier-corrected |                      |             |              |             |    | 0.218 |
| 1373 | COPD | genus.ErysipelotrichaceaeUCG003.id.11384   | Raw               | 0.00713777378164604  | 0.071734354 | 0.099502865  | 0.922056661 |    |       |
| 1374 | COPD | genus.ErysipelotrichaceaeUCG003.id.11384   | Outlier-corrected |                      |             |              |             | NA | 0.015 |
| 1375 | COPD | genus.Escherichia.Shigella.id.3504         | Raw               | 0.141049171928651    | 0.085122717 | 1.657009758  | 0.131896954 |    |       |
| 1376 | COPD | genus.Escherichia.Shigella.id.3504         | Outlier-corrected |                      |             |              |             |    | 0.093 |
| 1377 | COPD | genus.Faecalibacterium.id.2057             | Raw               | -0.0156950316832012  | 0.048776508 | -0.321774403 | 0.755870407 |    |       |

|      | A    | B                                          | C                 | D                    | E           | F            | G           | H                    | I     |
|------|------|--------------------------------------------|-------------------|----------------------|-------------|--------------|-------------|----------------------|-------|
| 1378 | COPD | genus.Faecalibacterium.id.2057             | Outlier-corrected |                      |             |              |             |                      | 0.781 |
| 1379 | COPD | genus.FamilyXIIID3011group.id.11293        | Raw               | -0.0297240769238096  | 0.096296151 | -0.308673572 | 0.762862926 |                      |       |
| 1380 | COPD | genus.FamilyXIIID3011group.id.11293        | Outlier-corrected | -0.0255412014534723  | 0.070771565 | -0.360896378 | 0.725684338 | rs16840310,rs9276029 | 0.001 |
| 1381 | COPD | genus.FamilyXIIICUG001.id.11294            | Raw               | 0.100999259386965    | 0.099388568 | 1.016206004  | 0.343361273 |                      |       |
| 1382 | COPD | genus.FamilyXIIICUG001.id.11294            | Outlier-corrected |                      |             |              |             |                      | 0.051 |
| 1383 | COPD | genus.Flavonifractor.id.2059               | Raw               | 0.0483134891798814   | 0.063141267 | 0.765165029  | 0.486824952 |                      |       |
| 1384 | COPD | genus.Flavonifractor.id.2059               | Outlier-corrected |                      |             |              |             |                      | 0.656 |
| 1385 | COPD | genus.Fusicatenibacter.id.11305            | Raw               | -0.0500051322705349  | 0.048575892 | -1.029422821 | 0.317705753 |                      |       |
| 1386 | COPD | genus.Fusicatenibacter.id.11305            | Outlier-corrected |                      |             |              |             |                      | 0.745 |
| 1387 | COPD | genus.Gordonibacter.id.821                 | Raw               | -0.0117744601146454  | 0.027512168 | -0.427972826 | 0.677741437 |                      |       |
| 1388 | COPD | genus.Gordonibacter.id.821                 | Outlier-corrected |                      |             |              |             |                      | 0.744 |
| 1389 | COPD | genus.Haemophilus.id.3698                  | Raw               | -0.0792430487378733  | 0.077368682 | -1.024226433 | 0.335698603 |                      |       |
| 1390 | COPD | genus.Haemophilus.id.3698                  | Outlier-corrected | -0.0195455006734075  | 0.075637651 | -0.258409673 | 0.803523988 | rs76022354           | 0.014 |
| 1391 | COPD | genus.Holdemanela.id.11393                 | Raw               | 0.162392223567595    | 0.034382221 | 4.723145205  | 0.000812562 |                      |       |
| 1392 | COPD | genus.Holdemanela.id.11393                 | Outlier-corrected |                      |             |              |             |                      | 0.787 |
| 1393 | COPD | genus.Holdemania.id.2157                   | Raw               | -0.105697702878677   | 0.047896129 | -2.206810958 | 0.047551949 |                      |       |
| 1394 | COPD | genus.Holdemania.id.2157                   | Outlier-corrected |                      |             |              |             |                      | 0.449 |
| 1395 | COPD | genus.Howardella.id.2000                   | Raw               | 0.0375424568886947   | 0.027273517 | 1.376516895  | 0.205955459 |                      |       |
| 1396 | COPD | genus.Howardella.id.2000                   | Outlier-corrected |                      |             |              |             |                      | 0.751 |
| 1397 | COPD | genus.Hungatella.id.11306                  | Raw               | 0.0104400366301917   | 0.062593047 | 0.166792274  | 0.875625555 |                      |       |
| 1398 | COPD | genus.Hungatella.id.11306                  | Outlier-corrected |                      |             |              |             |                      | 0.259 |
| 1399 | COPD | genus.Intestinibacter.id.11345             | Raw               | 0.000801841106271138 | 0.040080861 | 0.020005586  | 0.984321244 |                      |       |
| 1400 | COPD | genus.Intestinibacter.id.11345             | Outlier-corrected |                      |             |              |             |                      | 0.85  |
| 1401 | COPD | genus.Intestinimonas.id.2062               | Raw               | -0.050917900447607   | 0.042510761 | -1.197764978 | 0.24959326  |                      |       |
| 1402 | COPD | genus.Intestinimonas.id.2062               | Outlier-corrected |                      |             |              |             |                      | 0.651 |
| 1403 | COPD | genus.Lachnodostridium.id.11308            | Raw               | 0.050334527148521    | 0.08869973  | 0.567471029  | 0.580855686 |                      |       |
| 1404 | COPD | genus.Lachnodostridium.id.11308            | Outlier-corrected |                      |             |              |             | NA                   | 0.038 |
| 1405 | COPD | genus.Lachnospira.id.2004                  | Raw               | -0.0380897682246477  | 0.135262281 | -0.281599334 | 0.789533379 |                      |       |
| 1406 | COPD | genus.Lachnospira.id.2004                  | Outlier-corrected |                      |             |              |             |                      | 0.138 |
| 1407 | COPD | genus.LachnospiraceaeFCS020group.id.11314  | Raw               | -0.0338195094266588  | 0.07604383  | -0.444737059 | 0.665133508 |                      |       |
| 1408 | COPD | genus.LachnospiraceaeFCS020group.id.11314  | Outlier-corrected |                      |             |              |             |                      | 0.062 |
| 1409 | COPD | genus.LachnospiraceaeNC2004group.id.11316  | Raw               | -0.050092035925434   | 0.053398361 | -0.938081904 | 0.375655635 |                      |       |
| 1410 | COPD | genus.LachnospiraceaeNC2004group.id.11316  | Outlier-corrected |                      |             |              |             |                      | 0.296 |
| 1411 | COPD | genus.LachnospiraceaeND3007group.id.11317  | dat<4SNP          | dat<4SNP             |             |              |             |                      |       |
| 1412 | COPD | genus.LachnospiraceaeND3007group.id.11317  |                   |                      |             |              |             |                      |       |
| 1413 | COPD | genus.LachnospiraceaeNK4A136group.id.11319 | Raw               | -0.0763194420944354  | 0.039434906 | -1.935327081 | 0.075005772 |                      |       |
| 1414 | COPD | genus.LachnospiraceaeNK4A136group.id.11319 | Outlier-corrected |                      |             |              |             |                      | 0.829 |
| 1415 | COPD | genus.LachnospiraceaeUCG001.id.11321       | Raw               | 0.0743681013224904   | 0.051596026 | 1.44135327   | 0.175067797 |                      |       |
| 1416 | COPD | genus.LachnospiraceaeUCG001.id.11321       | Outlier-corrected |                      |             |              |             |                      | 0.308 |
| 1417 | COPD | genus.LachnospiraceaeUCG004.id.11324       | Raw               | -0.146493264708272   | 0.060337799 | -2.427885453 | 0.035578625 |                      |       |
| 1418 | COPD | genus.LachnospiraceaeUCG004.id.11324       | Outlier-corrected |                      |             |              |             |                      | 0.62  |
| 1419 | COPD | genus.LachnospiraceaeUCG008.id.11328       | Raw               | -0.0634286574032034  | 0.042950865 | -1.476772542 | 0.177983176 |                      |       |
| 1420 | COPD | genus.LachnospiraceaeUCG008.id.11328       | Outlier-corrected |                      |             |              |             |                      | 0.59  |
| 1421 | COPD | genus.LachnospiraceaeUCG010.id.11330       | Raw               | -0.153556799223326   | 0.051016622 | -3.009936645 | 0.014717363 |                      |       |
| 1422 | COPD | genus.LachnospiraceaeUCG010.id.11330       | Outlier-corrected |                      |             |              |             |                      | 0.813 |
| 1423 | COPD | genus.Lactobacillus.id.1837                | Raw               | -0.0179566212956914  | 0.080943202 | -0.22184224  | 0.831794609 |                      |       |
| 1424 | COPD | genus.Lactobacillus.id.1837                | Outlier-corrected |                      |             |              |             | NA                   | 0.023 |
| 1425 | COPD | genus.Lactococcus.id.1851                  | Raw               | 0.058035098205691    | 0.053553548 | 1.083683536  | 0.314413814 |                      |       |
| 1426 | COPD | genus.Lactococcus.id.1851                  | Outlier-corrected |                      |             |              |             |                      | 0.133 |
| 1427 | COPD | genus.Marvinbryantia.id.2005               | Raw               | 0.120583771734435    | 0.045027583 | 2.677997869  | 0.025288883 |                      |       |
| 1428 | COPD | genus.Marvinbryantia.id.2005               | Outlier-corrected |                      |             |              |             |                      | 0.885 |

|      | A    | B                                          | C                 | D                    | E           | F            | G           | H                  | I      |
|------|------|--------------------------------------------|-------------------|----------------------|-------------|--------------|-------------|--------------------|--------|
| 1429 | COPD | genus.Methanobrevibacter.id.123            | Raw               | -0.0694174419967376  | 0.09923898  | -0.699497737 | 0.522782401 |                    |        |
| 1430 | COPD | genus.Methanobrevibacter.id.123            | Outlier-corrected | -0.0808584046524197  | 0.059842421 | -1.35118873  | 0.309187901 | rs4802933,rs894996 | 0.032  |
| 1431 | COPD | genus.Odoribacter.id.952                   | Raw               | 0.10687049215878     | 0.114998131 | 0.92932373   | 0.38858066  |                    |        |
| 1432 | COPD | genus.Odoribacter.id.952                   | Outlier-corrected |                      |             |              |             |                    | 0.078  |
| 1433 | COPD | genus.Olsenella.id.822                     | Raw               | -0.0497897835138478  | 0.01765921  | -2.819479705 | 0.020064045 |                    |        |
| 1434 | COPD | genus.Olsenella.id.822                     | Outlier-corrected |                      |             |              |             |                    | 0.982  |
| 1435 | COPD | genus.Oscillibacter.id.2063                | Raw               | -0.00592478194386495 | 0.066348405 | -0.089298031 | 0.930608211 |                    |        |
| 1436 | COPD | genus.Oscillibacter.id.2063                | Outlier-corrected |                      |             |              |             |                    | 0.057  |
| 1437 | COPD | genus.Oscillospira.id.2064                 | Raw               | -0.0934735905652249  | 0.060956592 | -1.533445154 | 0.169033984 |                    |        |
| 1438 | COPD | genus.Oscillospira.id.2064                 | Outlier-corrected |                      |             |              |             |                    | 0.469  |
| 1439 | COPD | genus.Oxalobacter.id.2978                  | Raw               | 0.0913334474510565   | 0.048048872 | 1.90084476   | 0.086501862 |                    |        |
| 1440 | COPD | genus.Oxalobacter.id.2978                  | Outlier-corrected |                      |             |              |             |                    | 0.052  |
| 1441 | COPD | genus.Parabacteroides.id.954               | Raw               | 0.148871023709079    | 0.040866693 | 3.642844924  | 0.021909487 |                    |        |
| 1442 | COPD | genus.Parabacteroides.id.954               | Outlier-corrected |                      |             |              |             |                    | 0.96   |
| 1443 | COPD | genus.Paraprevotella.id.962                | Raw               | -0.00189380724467337 | 0.031630865 | -0.05987213  | 0.953331381 |                    |        |
| 1444 | COPD | genus.Paraprevotella.id.962                | Outlier-corrected |                      |             |              |             |                    | 0.801  |
| 1445 | COPD | genus.Parasutterella.id.2892               | Raw               | -0.00735630747955227 | 0.071359887 | -0.103087432 | 0.919596322 |                    |        |
| 1446 | COPD | genus.Parasutterella.id.2892               | Outlier-corrected |                      |             |              |             | NA                 | 0.045  |
| 1447 | COPD | genus.Peptococcus.id.2037                  | Raw               | 0.0231357460527309   | 0.0310375   | 0.745412668  | 0.471650191 |                    |        |
| 1448 | COPD | genus.Peptococcus.id.2037                  | Outlier-corrected |                      |             |              |             |                    | 0.754  |
| 1449 | COPD | genus.Phascolarctobacterium.id.2168        | Raw               | -0.0117735071050137  | 0.070380089 | -0.167284629 | 0.87187618  |                    |        |
| 1450 | COPD | genus.Phascolarctobacterium.id.2168        | Outlier-corrected |                      |             |              |             |                    | 0.345  |
| 1451 | COPD | genus.Preotella7.id.11182                  | Raw               | 0.0187822773091263   | 0.016325241 | 1.150505336  | 0.276704295 |                    |        |
| 1452 | COPD | genus.Preotella7.id.11182                  | Outlier-corrected |                      |             |              |             |                    | 0.983  |
| 1453 | COPD | genus.Preotella9.id.11183                  | Raw               | -0.0804181915186109  | 0.027986202 | -2.873494247 | 0.012267785 |                    |        |
| 1454 | COPD | genus.Preotella9.id.11183                  | Outlier-corrected |                      |             |              |             |                    | 0.964  |
| 1455 | COPD | genus.RikenellaceaeRC9gutgroup.id.11191    | Raw               | -0.00543064463280373 | 0.048192287 | -0.112687009 | 0.912508733 |                    |        |
| 1456 | COPD | genus.RikenellaceaeRC9gutgroup.id.11191    | Outlier-corrected | -0.0370924608675814  | 0.031848073 | -1.164668907 | 0.274094677 | rs2074881          | 0.019  |
| 1457 | COPD | genus.Romboutsia.id.11347                  | Raw               | -0.105513078675292   | 0.051707156 | -2.040589502 | 0.063924334 |                    |        |
| 1458 | COPD | genus.Romboutsia.id.11347                  | Outlier-corrected |                      |             |              |             |                    | 0.655  |
| 1459 | COPD | genus.Roseburia.id.2012                    | Raw               | 0.082093626383093    | 0.054833758 | 1.497136603  | 0.158238887 |                    |        |
| 1460 | COPD | genus.Roseburia.id.2012                    | Outlier-corrected |                      |             |              |             |                    | 0.761  |
| 1461 | COPD | genus.Ruminiclostridium5.id.11355          | Raw               | -0.0354650498801734  | 0.069436394 | -0.510755926 | 0.620607324 |                    |        |
| 1462 | COPD | genus.Ruminiclostridium5.id.11355          | Outlier-corrected |                      |             |              |             |                    | 0.462  |
| 1463 | COPD | genus.Ruminiclostridium6.id.11356          | Raw               | 0.0696722343343976   | 0.059999888 | 1.161206077  | 0.264974892 |                    |        |
| 1464 | COPD | genus.Ruminiclostridium6.id.11356          | Outlier-corrected |                      |             |              |             |                    | 0.255  |
| 1465 | COPD | genus.Ruminiclostridium9.id.11357          | Raw               | -0.0218335703202862  | 0.078407553 | -0.278462589 | 0.788703581 |                    |        |
| 1466 | COPD | genus.Ruminiclostridium9.id.11357          | Outlier-corrected |                      |             |              |             |                    | 0.532  |
| 1467 | COPD | genus.RuminococcaceaeNK4A214group.id.11358 | Raw               | -0.0254781873960375  | 0.053273048 | -0.478256615 | 0.641062481 |                    |        |
| 1468 | COPD | genus.RuminococcaceaeNK4A214group.id.11358 | Outlier-corrected |                      |             |              |             |                    | 0.685  |
| 1469 | COPD | genus.RuminococcaceaeUCG002.id.11360       | Raw               | -0.0413761594237595  | 0.07128843  | -0.580404976 | 0.568462107 |                    |        |
| 1470 | COPD | genus.RuminococcaceaeUCG002.id.11360       | Outlier-corrected | -0.082220740656603   | 0.058582515 | -1.403503087 | 0.177483426 | rs7155595          | <0.001 |
| 1471 | COPD | genus.RuminococcaceaeUCG003.id.11361       | Raw               | -0.0784052184980966  | 0.05558664  | -1.410504731 | 0.186038001 |                    |        |
| 1472 | COPD | genus.RuminococcaceaeUCG003.id.11361       | Outlier-corrected |                      |             |              |             |                    | 0.554  |
| 1473 | COPD | genus.RuminococcaceaeUCG004.id.11362       | Raw               | -0.0866879718392689  | 0.067153103 | -1.290900455 | 0.225782681 |                    |        |
| 1474 | COPD | genus.RuminococcaceaeUCG004.id.11362       | Outlier-corrected |                      |             |              |             |                    | 0.117  |
| 1475 | COPD | genus.RuminococcaceaeUCG005.id.11363       | Raw               | 0.0313208449013807   | 0.062299333 | 0.502747673  | 0.623550561 |                    |        |
| 1476 | COPD | genus.RuminococcaceaeUCG005.id.11363       | Outlier-corrected |                      |             |              |             |                    | 0.173  |
| 1477 | COPD | genus.RuminococcaceaeUCG009.id.11366       | Raw               | 0.00760637668714894  | 0.06567133  | 0.115824922  | 0.910084216 |                    |        |
| 1478 | COPD | genus.RuminococcaceaeUCG009.id.11366       | Outlier-corrected |                      |             |              |             | NA                 | 0.03   |
| 1479 | COPD | genus.RuminococcaceaeUCG010.id.11367       | Raw               | 0.0855239024097141   | 0.077884228 | 1.098090131  | 0.322208427 |                    |        |

|      | A    | B                                    | C                 | D                    | E           | F            | G           | H         | I     |
|------|------|--------------------------------------|-------------------|----------------------|-------------|--------------|-------------|-----------|-------|
| 1480 | COPD | genus.RuminococcaceaeUCG010.id.11367 | Outlier-corrected |                      |             |              |             |           | 0.408 |
| 1481 | COPD | genus.RuminococcaceaeUCG011.id.11368 | Raw               | -0.00513564293471142 | 0.039203032 | -0.131001165 | 0.90005645  |           |       |
| 1482 | COPD | genus.RuminococcaceaeUCG011.id.11368 | Outlier-corrected |                      |             |              |             |           | 0.404 |
| 1483 | COPD | genus.RuminococcaceaeUCG013.id.11370 | Raw               | 0.0440413687255676   | 0.043651736 | 1.008925944  | 0.336799079 |           |       |
| 1484 | COPD | genus.RuminococcaceaeUCG013.id.11370 | Outlier-corrected |                      |             |              |             |           | 0.929 |
| 1485 | COPD | genus.RuminococcaceaeUCG014.id.11371 | Raw               | 0.0241785250920529   | 0.072538128 | 0.333321603  | 0.746525564 |           |       |
| 1486 | COPD | genus.RuminococcaceaeUCG014.id.11371 | Outlier-corrected |                      |             |              |             |           | 0.137 |
| 1487 | COPD | genus.Ruminococcus1.id.11373         | Raw               | -0.0844779124057666  | 0.079946091 | -1.056685971 | 0.318192513 |           |       |
| 1488 | COPD | genus.Ruminococcus1.id.11373         | Outlier-corrected |                      |             |              |             |           | 0.125 |
| 1489 | COPD | genus.Ruminococcus2.id.11374         | Raw               | -0.031317308211984   | 0.046325363 | -0.676029412 | 0.510036127 |           |       |
| 1490 | COPD | genus.Ruminococcus2.id.11374         | Outlier-corrected |                      |             |              |             |           | 0.603 |
| 1491 | COPD | genus.Sellimonas.id.14369            | Raw               | 0.00134137097269847  | 0.031627404 | 0.042411668  | 0.967209958 |           |       |
| 1492 | COPD | genus.Sellimonas.id.14369            | Outlier-corrected |                      |             |              |             |           | 0.486 |
| 1493 | COPD | genus.Senegalimassilia.id.11160      | Raw               | 0.0671302630196257   | 0.069343714 | 0.968080003  | 0.387824636 |           |       |
| 1494 | COPD | genus.Senegalimassilia.id.11160      | Outlier-corrected |                      |             |              |             |           | 0.487 |
| 1495 | COPD | genus.Slackia.id.825                 | Raw               | 0.00867000277363817  | 0.058715042 | 0.147662379  | 0.888379083 |           |       |
| 1496 | COPD | genus.Slackia.id.825                 | Outlier-corrected |                      |             |              |             |           | 0.489 |
| 1497 | COPD | genus.Streptococcus.id.1853          | Raw               | 0.136552095039265    | 0.070922006 | 1.925383981  | 0.080414495 |           |       |
| 1498 | COPD | genus.Streptococcus.id.1853          | Outlier-corrected |                      |             |              |             |           | 0.307 |
| 1499 | COPD | genus.Subdoligranulum.id.2070        | Raw               | 0.0721391819059894   | 0.059562504 | 1.211150917  | 0.25368224  |           |       |
| 1500 | COPD | genus.Subdoligranulum.id.2070        | Outlier-corrected |                      |             |              |             |           | 0.591 |
| 1501 | COPD | genus.Sutterella.id.2896             | Raw               | -0.02120301965354    | 0.043461252 | -0.487860299 | 0.635227172 |           |       |
| 1502 | COPD | genus.Sutterella.id.2896             | Outlier-corrected |                      |             |              |             |           | 0.876 |
| 1503 | COPD | genus.Terrisporobacter.id.11348      | Raw               | -0.0110040721158592  | 0.033231036 | -0.331138397 | 0.757161027 |           |       |
| 1504 | COPD | genus.Terrisporobacter.id.11348      | Outlier-corrected |                      |             |              |             |           | 0.928 |
| 1505 | COPD | genus.Turicibacter.id.2162           | Raw               | 0.0111066823906807   | 0.056549027 | 0.196408021  | 0.849188452 |           |       |
| 1506 | COPD | genus.Turicibacter.id.2162           | Outlier-corrected |                      |             |              |             |           | 0.386 |
| 1507 | COPD | genus.Tyzzerella3.id.11335           | Raw               | -0.0491540083501422  | 0.043481571 | -1.13045613  | 0.282330268 |           |       |
| 1508 | COPD | genus.Tyzzerella3.id.11335           | Outlier-corrected |                      |             |              |             |           | 0.224 |
| 1509 | COPD | genus.Veillonella.id.2198            | Raw               | 0.0197647700602785   | 0.123695541 | 0.159785631  | 0.880793965 |           |       |
| 1510 | COPD | genus.Veillonella.id.2198            | Outlier-corrected |                      |             |              |             |           | 0.063 |
| 1511 | COPD | genus.Victivallis.id.2256            | Raw               | 0.00994338052400912  | 0.040496057 | 0.245539471  | 0.811546365 |           |       |
| 1512 | COPD | genus.Victivallis.id.2256            | Outlier-corrected |                      |             |              |             |           | 0.211 |
| 1513 | COPD | order.Actinomycetales.id.420         | Raw               | -0.0674431096362063  | 0.105150784 | -0.641394265 | 0.566904657 |           |       |
| 1514 | COPD | order.Actinomycetales.id.420         | Outlier-corrected |                      |             |              |             |           | 0.247 |
| 1515 | COPD | order.Bacillales.id.1674             | Raw               | -0.0117666676999459  | 0.04743274  | -0.248070589 | 0.812351669 |           |       |
| 1516 | COPD | order.Bacillales.id.1674             | Outlier-corrected |                      |             |              |             |           | 0.209 |
| 1517 | COPD | order.Bacteroidales.id.913           | Raw               | -0.161636111694536   | 0.081383577 | -1.986102336 | 0.072508725 |           |       |
| 1518 | COPD | order.Bacteroidales.id.913           | Outlier-corrected |                      |             |              |             |           | 0.184 |
| 1519 | COPD | order.Bifidobacteriales.id.432       | Raw               | -0.0572775864820256  | 0.070802777 | -0.808973724 | 0.439391702 |           |       |
| 1520 | COPD | order.Bifidobacteriales.id.432       | Outlier-corrected |                      |             |              |             |           | 0.388 |
| 1521 | COPD | order.Burkholderiales.id.2874        | Raw               | -0.0536083896413336  | 0.091415128 | -0.58642799  | 0.57375806  |           |       |
| 1522 | COPD | order.Burkholderiales.id.2874        | Outlier-corrected |                      |             |              |             |           | 0.182 |
| 1523 | COPD | order.Clostridiales.id.1863          | Raw               | -0.15616352128013    | 0.097481864 | -1.601975128 | 0.140243578 |           |       |
| 1524 | COPD | order.Clostridiales.id.1863          | Outlier-corrected | -0.210154626103773   | 0.0822549   | -2.554919236 | 0.030943992 | rs2273429 | 0.041 |
| 1525 | COPD | order.Coriobacteriales.id.810        | Raw               | 0.0336052917205119   | 0.058495909 | 0.574489604  | 0.575443473 |           |       |
| 1526 | COPD | order.Coriobacteriales.id.810        | Outlier-corrected |                      |             |              |             |           | 0.585 |
| 1527 | COPD | order.Desulfovibrionales.id.3156     | Raw               | 0.0615578612842225   | 0.082937737 | 0.742217761  | 0.475027771 |           |       |
| 1528 | COPD | order.Desulfovibrionales.id.3156     | Outlier-corrected |                      |             |              |             |           | 0.133 |
| 1529 | COPD | order.Enterobacteriales.id.3468      | Raw               | 0.0057807848078939   | 0.085288009 | 0.067779573  | 0.948163371 |           |       |
| 1530 | COPD | order.Enterobacteriales.id.3468      | Outlier-corrected |                      |             |              |             |           | 0.377 |

|      | A    | B                                 | C                 | D                   | E           | F            | G           | H                   | I     |
|------|------|-----------------------------------|-------------------|---------------------|-------------|--------------|-------------|---------------------|-------|
| 1531 | COPD | order.Erysipelotrichales.id.2148  | Raw               | -0.0315673269978064 | 0.079056647 | -0.399300098 | 0.696687203 |                     |       |
| 1532 | COPD | order.Erysipelotrichales.id.2148  | Outlier-corrected |                     |             |              |             |                     | 0.197 |
| 1533 | COPD | order.Gastranaerophilales.id.1591 | Raw               | 0.037068648070128   | 0.031588805 | 1.173474231  | 0.274356605 |                     |       |
| 1534 | COPD | order.Gastranaerophilales.id.1591 | Outlier-corrected |                     |             |              |             |                     | 0.874 |
| 1535 | COPD | order.Lactobacillales.id.1800     | Raw               | -0.113999287733802  | 0.058104422 | -1.961972663 | 0.0715369   |                     |       |
| 1536 | COPD | order.Lactobacillales.id.1800     | Outlier-corrected |                     |             |              |             |                     | 0.502 |
| 1537 | COPD | order.Methanobacteriales.id.120   | Raw               | -0.0504575789989376 | 0.056572056 | -0.891917014 | 0.402054922 |                     |       |
| 1538 | COPD | order.Methanobacteriales.id.120   | Outlier-corrected |                     |             |              |             |                     | 0.08  |
| 1539 | COPD | order.MollicutesRF9.id.11579      | Raw               | 0.0106969334822035  | 0.048123807 | 0.222279453  | 0.82816948  |                     |       |
| 1540 | COPD | order.MollicutesRF9.id.11579      | Outlier-corrected |                     |             |              |             |                     | 0.588 |
| 1541 | COPD | order.NB1n.id.3953                | Raw               | -0.0283049445844747 | 0.035021654 | -0.808212663 | 0.436098625 |                     |       |
| 1542 | COPD | order.NB1n.id.3953                | Outlier-corrected |                     |             |              |             |                     | 0.522 |
| 1543 | COPD | order.Pasteurellales.id.3688      | Raw               | -0.0529645332287137 | 0.059633763 | -0.88816352  | 0.391907827 |                     |       |
| 1544 | COPD | order.Pasteurellales.id.3688      | Outlier-corrected |                     |             |              |             | NA                  | 0.02  |
| 1545 | COPD | order.Rhodospirillales.id.2667    | Raw               | 0.00171141412931772 | 0.036195667 | 0.047282293  | 0.963066037 |                     |       |
| 1546 | COPD | order.Rhodospirillales.id.2667    | Outlier-corrected |                     |             |              |             |                     | 0.753 |
| 1547 | COPD | order.Selenomonadales.id.2165     | Raw               | -0.0596666756554796 | 0.059185075 | -1.008137191 | 0.335050477 |                     |       |
| 1548 | COPD | order.Selenomonadales.id.2165     | Outlier-corrected |                     |             |              |             |                     | 0.684 |
| 1549 | COPD | order.Verrucomicrobiales.id.4030  | Raw               | 0.0236692911612742  | 0.075220219 | 0.314666609  | 0.759482061 |                     |       |
| 1550 | COPD | order.Verrucomicrobiales.id.4030  | Outlier-corrected |                     |             |              |             |                     | 0.073 |
| 1551 | COPD | order.Victivallales.id.2254       | Raw               | 0.0164150803100757  | 0.044548024 | 0.368480547  | 0.723406341 |                     |       |
| 1552 | COPD | order.Victivallales.id.2254       | Outlier-corrected |                     |             |              |             |                     | 0.378 |
| 1553 | COPD | phylum.Actinobacteria.id.400      | Raw               | -0.0765265793893927 | 0.072708622 | -1.052510382 | 0.313298382 |                     |       |
| 1554 | COPD | phylum.Actinobacteria.id.400      | Outlier-corrected |                     |             |              |             |                     | 0.356 |
| 1555 | COPD | phylum.Bacteroidetes.id.905       | Raw               | -0.147426361928337  | 0.091800039 | -1.605950976 | 0.142747199 |                     |       |
| 1556 | COPD | phylum.Bacteroidetes.id.905       | Outlier-corrected |                     |             |              |             |                     | 0.144 |
| 1557 | COPD | phylum.Cyanobacteria.id.1500      | Raw               | -0.065233308501446  | 0.037825812 | -1.724571283 | 0.128260314 |                     |       |
| 1558 | COPD | phylum.Cyanobacteria.id.1500      | Outlier-corrected |                     |             |              |             |                     | 0.796 |
| 1559 | COPD | phylum.Euryarchaeota.id.55        | Raw               | -0.0122367385060121 | 0.057616875 | -0.212381155 | 0.836541828 |                     |       |
| 1560 | COPD | phylum.Euryarchaeota.id.55        | Outlier-corrected | -0.0187438111688725 | 0.036806295 | -0.509255586 | 0.62622967  | rs34928225,rs894996 | 0.005 |
| 1561 | COPD | phylum.Firmicutes.id.1672         | Raw               | -0.0404230752748536 | 0.09050832  | -0.446622757 | 0.662496931 |                     |       |
| 1562 | COPD | phylum.Firmicutes.id.1672         | Outlier-corrected | 0.0260304277049868  | 0.081202113 | 0.320563427  | 0.754054732 | rs6815608           | 0.002 |
| 1563 | COPD | phylum.Lentisphaerae.id.2238      | Raw               | 0.0154560164469221  | 0.039022912 | 0.396075424  | 0.702403385 |                     |       |
| 1564 | COPD | phylum.Lentisphaerae.id.2238      | Outlier-corrected |                     |             |              |             |                     | 0.489 |
| 1565 | COPD | phylum.Proteobacteria.id.2375     | Raw               | -0.151817887330569  | 0.089694991 | -1.692601621 | 0.11862769  |                     |       |
| 1566 | COPD | phylum.Proteobacteria.id.2375     | Outlier-corrected |                     |             |              |             | NA                  | 0.048 |
| 1567 | COPD | phylum.Tenericutes.id.3919        | Raw               | -0.094422417030693  | 0.054607772 | -1.729102165 | 0.111715258 |                     |       |
| 1568 | COPD | phylum.Tenericutes.id.3919        | Outlier-corrected |                     |             |              |             |                     | 0.424 |
| 1569 | COPD | phylum.Verrucomicrobia.id.3982    | Raw               | -0.0097338278995073 | 0.065799635 | -0.147931335 | 0.885073772 |                     |       |
| 1570 | COPD | phylum.Verrucomicrobia.id.3982    | Outlier-corrected |                     |             |              |             |                     | 0.152 |

|    | A                                                                           | B          | C                                                         | D                                           | E               | F           | G           |
|----|-----------------------------------------------------------------------------|------------|-----------------------------------------------------------|---------------------------------------------|-----------------|-------------|-------------|
| 1  | Supplementary table S6: Results of horizontal pleiotropy tests via MR-Egger |            |                                                           |                                             |                 |             |             |
| 2  | id.exposure                                                                 | id.outcome | outcome                                                   | exposure                                    | egger_intercept | se          | pval        |
| 3  | 0aMbT3                                                                      | vLGi8p     | Forced expiratory volume in 1-second (FEV1), Best measure | genus.Eggerthella.id.819                    | -0.009836376    | 0.005441723 | 0.104132515 |
| 4  | 0heWA4                                                                      | vLGi8p     | Forced expiratory volume in 1-second (FEV1), Best measure | genus.Lactococcus.id.1851                   | -0.003095259    | 0.003775908 | 0.439380573 |
| 5  | 0lsDJy                                                                      | vLGi8p     | Forced expiratory volume in 1-second (FEV1), Best measure | genus.DefluviitaleaceaeUCG011.id.11287      | 0.00218801      | 0.003571344 | 0.559471918 |
| 6  | 0ngO8p                                                                      | vLGi8p     | Forced expiratory volume in 1-second (FEV1), Best measure | genus.Flavonifractor.id.2059                | 0.002127865     | 0.012224189 | 0.872894041 |
| 7  | 0rTnk2                                                                      | vLGi8p     | Forced expiratory volume in 1-second (FEV1), Best measure | genus.Lachnospira.id.2004                   | -0.006127658    | 0.009270594 | 0.54475529  |
| 8  | 0rWmph                                                                      | vLGi8p     | Forced expiratory volume in 1-second (FEV1), Best measure | phylum.Firmicutes.id.1672                   | -0.002851879    | 0.003145889 | 0.379987938 |
| 9  | 0Vfsi1                                                                      | vLGi8p     | Forced expiratory volume in 1-second (FEV1), Best measure | genus.Hungatella.id.11306                   | 0.007916621     | 0.00706554  | 0.344129043 |
| 10 | 1rpkul                                                                      | vLGi8p     | Forced expiratory volume in 1-second (FEV1), Best measure | genus.FamilyXIIICUG001.id.11294             | -0.004854608    | 0.002826996 | 0.13674643  |
| 11 | 1uqUdL                                                                      | vLGi8p     | Forced expiratory volume in 1-second (FEV1), Best measure | genus.Escherichia.Shigella.id.3504          | 0.000433235     | 0.002178684 | 0.847339565 |
| 12 | 1zf0TZ                                                                      | vLGi8p     | Forced expiratory volume in 1-second (FEV1), Best measure | family.Streptococcaceae.id.1850             | 0.007371474     | 0.004962375 | 0.168246478 |
| 13 | 20HL0T                                                                      | vLGi8p     | Forced expiratory volume in 1-second (FEV1), Best measure | genus.Holdemanella.id.11393                 | 0.004018294     | 0.002503689 | 0.142967944 |
| 14 | 2GJP3o                                                                      | vLGi8p     | Forced expiratory volume in 1-second (FEV1), Best measure | genus.Ruminococcus2.id.11374                | -0.003486154    | 0.001837506 | 0.082118101 |
| 15 | 2neTKK                                                                      | vLGi8p     | Forced expiratory volume in 1-second (FEV1), Best measure | phylum.Euryarchaeota.id.55                  | 0.00140193      | 0.003482869 | 0.696693142 |
| 16 | 2vslhf                                                                      | vLGi8p     | Forced expiratory volume in 1-second (FEV1), Best measure | genus.Coproccoccus2.id.11302                | 0.01836957      | 0.006448138 | 0.02922689  |
| 17 | 31r1VV                                                                      | vLGi8p     | Forced expiratory volume in 1-second (FEV1), Best measure | family.Christensenellaceae.id.1866          | 0.000250687     | 0.001877541 | 0.896721118 |
| 18 | 37ZEpl                                                                      | vLGi8p     | Forced expiratory volume in 1-second (FEV1), Best measure | genus..Eubacteriumrectalegroup.id.14374     | 0.008024626     | 0.003036536 | 0.038402011 |
| 19 | 3cOJ1f                                                                      | vLGi8p     | Forced expiratory volume in 1-second (FEV1), Best measure | class.Actinobacteria.id.419                 | 0.000474889     | 0.00261212  | 0.85904474  |
| 20 | 3Oo7Td                                                                      | vLGi8p     | Forced expiratory volume in 1-second (FEV1), Best measure | class.Methanobacteria.id.119                | -0.000317587    | 0.005670013 | 0.957151121 |
| 21 | 3tgfXE                                                                      | vLGi8p     | Forced expiratory volume in 1-second (FEV1), Best measure | genus.Subdoligranulum.id.2070               | -0.003002632    | 0.003129555 | 0.365430724 |
| 22 | 4zBtt2                                                                      | vLGi8p     | Forced expiratory volume in 1-second (FEV1), Best measure | genus.Bilophila.id.3170                     | -0.004687089    | 0.004921235 | 0.363336583 |
| 23 | 5IXuob                                                                      | vLGi8p     | Forced expiratory volume in 1-second (FEV1), Best measure | genus.RuminococcaceaeUCG014.id.11371        | 0.000853877     | 0.002226725 | 0.7102743   |
| 24 | 5qEcKL                                                                      | vLGi8p     | Forced expiratory volume in 1-second (FEV1), Best measure | genus.Streptococcus.id.1853                 | 0.007804423     | 0.004092956 | 0.080768782 |
| 25 | 5TNOZ7                                                                      | vLGi8p     | Forced expiratory volume in 1-second (FEV1), Best measure | genus.Osillibacter.id.2063                  | 0.002364842     | 0.002850662 | 0.428232585 |
| 26 | 5XtLwc                                                                      | vLGi8p     | Forced expiratory volume in 1-second (FEV1), Best measure | genus.Catenibacterium.id.2153               | -0.01705616     | 0.010361007 | 0.19827834  |
| 27 | 6gX3qe                                                                      | vLGi8p     | Forced expiratory volume in 1-second (FEV1), Best measure | phylum.Tenericutes.id.3919                  | -0.004632339    | 0.003750416 | 0.245005886 |
| 28 | 6jMcBB                                                                      | vLGi8p     | Forced expiratory volume in 1-second (FEV1), Best measure | family.Desulfovibrionaceae.id.3169          | -0.001346853    | 0.002036723 | 0.527012302 |
| 29 | 6mlWxZ                                                                      | vLGi8p     | Forced expiratory volume in 1-second (FEV1), Best measure | genus.Copro bacter.id.949                   | -0.003529519    | 0.003675084 | 0.361947848 |
| 30 | 77YJKV                                                                      | vLGi8p     | Forced expiratory volume in 1-second (FEV1), Best measure | genus..Eubacteriumruminantiumgroup.id.11340 | -0.000276216    | 0.002788683 | 0.922329814 |
| 31 | 7aTYpg                                                                      | vLGi8p     | Forced expiratory volume in 1-second (FEV1), Best measure | genus.Collinsella.id.815                    | 0.001757218     | 0.003147406 | 0.594034281 |
| 32 | 7dqIOH                                                                      | vLGi8p     | Forced expiratory volume in 1-second (FEV1), Best measure | genus..Clostridiuminnocuumgroup.id.14397    | -0.000910938    | 0.004211379 | 0.834919121 |
| 33 | 7ioeKt                                                                      | vLGi8p     | Forced expiratory volume in 1-second (FEV1), Best measure | phylum.Proteobacteria.id.2375               | -0.002079302    | 0.004339363 | 0.64324433  |
| 34 | 80h8vf                                                                      | vLGi8p     | Forced expiratory volume in 1-second (FEV1), Best measure | genus.Anaerostipes.id.1991                  | 0.000300065     | 0.003677656 | 0.936581544 |
| 35 | 8jKldu                                                                      | vLGi8p     | Forced expiratory volume in 1-second (FEV1), Best measure | genus.Coproccoccus3.id.11303                | -0.001472156    | 0.002841395 | 0.620349716 |
| 36 | 8NULRM                                                                      | vLGi8p     | Forced expiratory volume in 1-second (FEV1), Best measure | genus.Paraprevotella.id.962                 | -0.001195249    | 0.003083176 | 0.706385275 |
| 37 | 9i4tiU                                                                      | vLGi8p     | Forced expiratory volume in 1-second (FEV1), Best measure | order.Gastranaerophilales.id.1591           | -0.006859564    | 0.004345599 | 0.158457448 |
| 38 | 9s731W                                                                      | vLGi8p     | Forced expiratory volume in 1-second (FEV1), Best measure | genus.RuminococcaceaeUCG009.id.11366        | -0.004720096    | 0.004262454 | 0.294060495 |
| 39 | aclMuF                                                                      | vLGi8p     | Forced expiratory volume in 1-second (FEV1), Best measure | genus.Parasutterella.id.2892                | 0.002034392     | 0.00383768  | 0.605705948 |
| 40 | AdsBD9                                                                      | vLGi8p     | Forced expiratory volume in 1-second (FEV1), Best measure | genus.Turicibacter.id.2162                  | 0.001861077     | 0.003879075 | 0.644230939 |
| 41 | aGfu8V                                                                      | vLGi8p     | Forced expiratory volume in 1-second (FEV1), Best measure | order.Bifidobacteriales.id.432              | -0.003989772    | 0.00595919  | 0.522016597 |
| 42 | AK0l7A                                                                      | vLGi8p     | Forced expiratory volume in 1-second (FEV1), Best measure | genus.LachnospiraceaeUCG010.id.11330        | -0.003552756    | 0.002159201 | 0.13850571  |
| 43 | aKuChq                                                                      | vLGi8p     | Forced expiratory volume in 1-second (FEV1), Best measure | genus.Faecalibacterium.id.2057              | 0.001508228     | 0.00361503  | 0.689022439 |
| 44 | aKXyAu                                                                      | vLGi8p     | Forced expiratory volume in 1-second (FEV1), Best measure | genus.Blautia.id.1992                       | -0.000697858    | 0.001947175 | 0.727497866 |
| 45 | AN8qjo                                                                      | vLGi8p     | Forced expiratory volume in 1-second (FEV1), Best measure | genus.Clostridiumsensustricto1.id.1873      | -0.004006422    | 0.003766369 | 0.336099992 |
| 46 | anDrA2                                                                      | vLGi8p     | Forced expiratory volume in 1-second (FEV1), Best measure | genus..Eubacteriumventriosumgroup.id.11341  | -0.003064517    | 0.003773151 | 0.432499607 |
| 47 | ASQ2fp                                                                      | vLGi8p     | Forced expiratory volume in 1-second (FEV1), Best measure | genus.RuminococcaceaeNK4A214group.id.11358  | -0.005416988    | 0.003426897 | 0.142246267 |
| 48 | aToCrK                                                                      | vLGi8p     | Forced expiratory volume in 1-second (FEV1), Best measure | genus.Anaerotruncus.id.2054                 | 0.001745873     | 0.00379759  | 0.654661783 |
| 49 | axDRMS                                                                      | vLGi8p     | Forced expiratory volume in 1-second (FEV1), Best measure | family.Prevotellaceae.id.960                | 0.002295826     | 0.002158889 | 0.306942671 |
| 50 | AXpdwL                                                                      | vLGi8p     | Forced expiratory volume in 1-second (FEV1), Best measure | family.Verrucomicrobiaceae.id.4036          | -0.000310634    | 0.004295593 | 0.943933101 |
| 51 | B5jn0Y                                                                      | vLGi8p     | Forced expiratory volume in 1-second (FEV1), Best measure | genus.Roseburia.id.2012                     | -0.003289827    | 0.003218347 | 0.328636784 |

|     | A      | B      | C                                                         | D                                           | E            | F           | G           |
|-----|--------|--------|-----------------------------------------------------------|---------------------------------------------|--------------|-------------|-------------|
| 52  | BiKMtW | vLGi8p | Forced expiratory volume in 1-second (FEV1), Best measure | genus.Sutterella.id.2896                    | -0.00089027  | 0.005153894 | 0.866304004 |
| 53  | BLC7wV | vLGi8p | Forced expiratory volume in 1-second (FEV1), Best measure | genus.RuminococcaceaeUCG013.id.11370        | -0.003501255 | 0.002666356 | 0.218473536 |
| 54  | BLSFBU | vLGi8p | Forced expiratory volume in 1-second (FEV1), Best measure | family.Rikenellaceae.id.967                 | 0.000449517  | 0.002703309 | 0.869895265 |
| 55  | BPW89n | vLGi8p | Forced expiratory volume in 1-second (FEV1), Best measure | order.Verrucomicrobiales.id.4030            | -0.000314255 | 0.004296419 | 0.943291749 |
| 56  | Bt0kEx | vLGi8p | Forced expiratory volume in 1-second (FEV1), Best measure | genus.LachnospiraceaeNK4A136group.id.11319  | -0.002002835 | 0.001395094 | 0.178928564 |
| 57  | Bt1upE | vLGi8p | Forced expiratory volume in 1-second (FEV1), Best measure | family.Rhodospirillaceae.id.2717            | -0.012309097 | 0.004836486 | 0.025698595 |
| 58  | C1xV1V | vLGi8p | Forced expiratory volume in 1-second (FEV1), Best measure | order.Victivallales.id.2254                 | 0.002533497  | 0.005709868 | 0.672808826 |
| 59  | c62fwk | vLGi8p | Forced expiratory volume in 1-second (FEV1), Best measure | genus.Sellimonas.id.14369                   | 0.001658395  | 0.007485269 | 0.832008657 |
| 60  | cqFLTQ | vLGi8p | Forced expiratory volume in 1-second (FEV1), Best measure | genus.Coproccocus1.id.11301                 | -0.00500227  | 0.00174129  | 0.016590729 |
| 61  | CUTsMo | vLGi8p | Forced expiratory volume in 1-second (FEV1), Best measure | family.ClostridialesvadinBB60group.id.11286 | -0.000121705 | 0.002410655 | 0.960565655 |
| 62  | CYNr8c | vLGi8p | Forced expiratory volume in 1-second (FEV1), Best measure | order.Actinomycetales.id.420                | -0.001989543 | 0.00284672  | 0.534930334 |
| 63  | d9u3Wa | vLGi8p | Forced expiratory volume in 1-second (FEV1), Best measure | family.Lactobacillaceae.id.1836             | 0.001150244  | 0.003574555 | 0.758529793 |
| 64  | dP6VTT | vLGi8p | Forced expiratory volume in 1-second (FEV1), Best measure | class.Alphaproteobacteria.id.2379           | -0.001936352 | 0.003836113 | 0.635175301 |
| 65  | dSCeM7 | vLGi8p | Forced expiratory volume in 1-second (FEV1), Best measure | order.Enterobacteriales.id.3468             | 0.009032143  | 0.00588828  | 0.185632606 |
| 66  | DwGyne | vLGi8p | Forced expiratory volume in 1-second (FEV1), Best measure | family.BacteroidalesS24.7group.id.11173     | 0.006432618  | 0.0038457   | 0.145419391 |
| 67  | E1ZDX3 | vLGi8p | Forced expiratory volume in 1-second (FEV1), Best measure | genus.Oxalobacter.id.2978                   | 0.007615658  | 0.004693969 | 0.139159341 |
| 68  | e5mJnF | vLGi8p | Forced expiratory volume in 1-second (FEV1), Best measure | genus.Dorea.id.1997                         | -0.000824205 | 0.003021862 | 0.791955546 |
| 69  | ebP4zV | vLGi8p | Forced expiratory volume in 1-second (FEV1), Best measure | genus.Ruminococcus1.id.11373                | 0.000716863  | 0.002719464 | 0.798747426 |
| 70  | FcqSNY | vLGi8p | Forced expiratory volume in 1-second (FEV1), Best measure | family.Clostridiaceae1.id.1869              | -0.005368528 | 0.003606653 | 0.174939401 |
| 71  | fE3r8h | vLGi8p | Forced expiratory volume in 1-second (FEV1), Best measure | phylum.Verrucomicrobia.id.3982              | -0.002777298 | 0.003740663 | 0.474886711 |
| 72  | FFi1Rd | vLGi8p | Forced expiratory volume in 1-second (FEV1), Best measure | family.Actinomycetaceae.id.421              | -0.002008901 | 0.002847177 | 0.531304881 |
| 73  | FIVBaS | vLGi8p | Forced expiratory volume in 1-second (FEV1), Best measure | order.Erysipelotrichales.id.2148            | 0.003848326  | 0.002907631 | 0.212508901 |
| 74  | Fr2Ff4 | vLGi8p | Forced expiratory volume in 1-second (FEV1), Best measure | class.Clostridia.id.1859                    | -0.000510348 | 0.004372461 | 0.909393876 |
| 75  | FRQYhm | vLGi8p | Forced expiratory volume in 1-second (FEV1), Best measure | class.Gammaproteobacteria.id.3303           | -0.003759719 | 0.00337743  | 0.31626085  |
| 76  | FT7OrH | vLGi8p | Forced expiratory volume in 1-second (FEV1), Best measure | genus.Actinomyces.id.423                    | -0.005298312 | 0.003435106 | 0.183618328 |
| 77  | FXBXNG | vLGi8p | Forced expiratory volume in 1-second (FEV1), Best measure | family.FamilyXI.id.1936                     | 0.004707681  | 0.004953528 | 0.3786191   |
| 78  | gkAVOW | vLGi8p | Forced expiratory volume in 1-second (FEV1), Best measure | phylum.Lentisphaerae.id.2238                | 0.002805884  | 0.005435294 | 0.621593155 |
| 79  | GNp2YQ | vLGi8p | Forced expiratory volume in 1-second (FEV1), Best measure | genus..Ruminococcusgauvreauigroup.id.11342  | -0.001426792 | 0.005661416 | 0.806129282 |
| 80  | hUph1f | vLGi8p | Forced expiratory volume in 1-second (FEV1), Best measure | genus.RikenellaceaeRC9gutgroup.id.11191     | 0.001939085  | 0.006289098 | 0.764852184 |
| 81  | l2CEyx | vLGi8p | Forced expiratory volume in 1-second (FEV1), Best measure | genus.Tyzzere1la3.id.11335                  | 0.011013801  | 0.005307479 | 0.064722633 |
| 82  | l5XXsr | vLGi8p | Forced expiratory volume in 1-second (FEV1), Best measure | genus.Prevotella9.id.11183                  | -0.00109736  | 0.003643368 | 0.768421883 |
| 83  | iAhkfC | vLGi8p | Forced expiratory volume in 1-second (FEV1), Best measure | genus.Erysipelatoclostridium.id.11381       | -0.000872469 | 0.002326784 | 0.713730673 |
| 84  | IgBtIU | vLGi8p | Forced expiratory volume in 1-second (FEV1), Best measure | class.Bacilli.id.1673                       | -0.002810953 | 0.001786865 | 0.136542786 |
| 85  | lI0qrp | vLGi8p | Forced expiratory volume in 1-second (FEV1), Best measure | phylum.Actinobacteria.id.400                | 0.005464605  | 0.004179614 | 0.215558621 |
| 86  | iMGTCd | vLGi8p | Forced expiratory volume in 1-second (FEV1), Best measure | genus.Ruminiclostridium5.id.11355           | -0.001953931 | 0.00341472  | 0.582898771 |
| 87  | iwPbIH | vLGi8p | Forced expiratory volume in 1-second (FEV1), Best measure | genus.Ruminiclostridium6.id.11356           | -0.001173071 | 0.002056728 | 0.578160162 |
| 88  | j0mByl | vLGi8p | Forced expiratory volume in 1-second (FEV1), Best measure | order.NB1n.id.3953                          | -0.000655042 | 0.0033868   | 0.850162727 |
| 89  | j4g0ZV | vLGi8p | Forced expiratory volume in 1-second (FEV1), Best measure | genus.CandidatusSoleaferrea.id.11350        | 0.006834938  | 0.010334325 | 0.529527586 |
| 90  | j87dXS | vLGi8p | Forced expiratory volume in 1-second (FEV1), Best measure | genus.Eisenbergiella.id.11304               | -0.000633901 | 0.006378867 | 0.923018689 |
| 91  | jfZByg | vLGi8p | Forced expiratory volume in 1-second (FEV1), Best measure | order.Lactobacillales.id.1800               | -0.00287562  | 0.001863908 | 0.14883085  |
| 92  | JHChB7 | vLGi8p | Forced expiratory volume in 1-second (FEV1), Best measure | genus.Adlercreutzia.id.812                  | -0.003799712 | 0.006795478 | 0.596294701 |
| 93  | jHia6Z | vLGi8p | Forced expiratory volume in 1-second (FEV1), Best measure | order.Pasteurellales.id.3688                | -0.002176841 | 0.001957397 | 0.287874647 |
| 94  | jJC3Fm | vLGi8p | Forced expiratory volume in 1-second (FEV1), Best measure | genus.Enterorhabdus.id.820                  | -0.002439664 | 0.004259289 | 0.59744835  |
| 95  | jUcEpg | vLGi8p | Forced expiratory volume in 1-second (FEV1), Best measure | genus.Butyricimonas.id.945                  | -0.004747856 | 0.005160604 | 0.379221282 |
| 96  | kjA5PB | vLGi8p | Forced expiratory volume in 1-second (FEV1), Best measure | genus.RuminococcaceaeUCG010.id.11367        | -0.000401218 | 0.002892315 | 0.896375996 |
| 97  | kodRd1 | vLGi8p | Forced expiratory volume in 1-second (FEV1), Best measure | family.Defluviitaleaceae.id.1924            | 0.0017127    | 0.002704485 | 0.542305476 |
| 98  | lCZ8yH | vLGi8p | Forced expiratory volume in 1-second (FEV1), Best measure | genus.Prevotella7.id.11182                  | -0.003195541 | 0.008739974 | 0.723091645 |
| 99  | lUcl8y | vLGi8p | Forced expiratory volume in 1-second (FEV1), Best measure | genus.RuminococcaceaeUCG003.id.11361        | 0.001037706  | 0.00400547  | 0.800834369 |
| 100 | LKYg6S | vLGi8p | Forced expiratory volume in 1-second (FEV1), Best measure | genus.Terrisporobacter.id.11348             | -9.01371E-05 | 0.002993238 | 0.977867816 |
| 101 | LRKdla | vLGi8p | Forced expiratory volume in 1-second (FEV1), Best measure | family.Bifidobacteriaceae.id.433            | -0.003989772 | 0.00595919  | 0.522016597 |
| 102 | m0ByAU | vLGi8p | Forced expiratory volume in 1-second (FEV1), Best measure | order.Desulfovibrionales.id.3156            | -0.001728909 | 0.00188249  | 0.380019956 |

|     | A      | B      | C                                                         | D                                                 | E            | F           | G           |
|-----|--------|--------|-----------------------------------------------------------|---------------------------------------------------|--------------|-------------|-------------|
| 103 | m9LxEq | vLGi8p | Forced expiratory volume in 1-second (FEV1), Best measure | family.Enterobacteriaceae.id.3469                 | 0.009032143  | 0.00588828  | 0.185632606 |
| 104 | MBOR7Y | vLGi8p | Forced expiratory volume in 1-second (FEV1), Best measure | family.Coriobacteriaceae.id.811                   | -0.005770678 | 0.005595775 | 0.32275824  |
| 105 | MpL626 | vLGi8p | Forced expiratory volume in 1-second (FEV1), Best measure | genus.Lachnoclostridium.id.11308                  | -0.007646992 | 0.003675908 | 0.06166612  |
| 106 | Msb4zz | vLGi8p | Forced expiratory volume in 1-second (FEV1), Best measure | class.Melainabacteria.id.1589                     | -0.001066259 | 0.004085616 | 0.800701461 |
| 107 | MXS84H | vLGi8p | Forced expiratory volume in 1-second (FEV1), Best measure | class.Negativicutes.id.2164                       | -0.00317476  | 0.002294996 | 0.199907923 |
| 108 | mz9jd0 | vLGi8p | Forced expiratory volume in 1-second (FEV1), Best measure | genus.Barnesiella.id.944                          | 0.003744843  | 0.003482575 | 0.3033819   |
| 109 | n3j0op | vLGi8p | Forced expiratory volume in 1-second (FEV1), Best measure | class.Deltaproteobacteria.id.3087                 | -0.0004202   | 0.001920686 | 0.8308306   |
| 110 | nFlAu5 | vLGi8p | Forced expiratory volume in 1-second (FEV1), Best measure | family.Lachnospiraceae.id.1987                    | 0.001184006  | 0.0021142   | 0.583729571 |
| 111 | nlesEv | vLGi8p | Forced expiratory volume in 1-second (FEV1), Best measure | genus.Peptococcus.id.2037                         | 0.004534094  | 0.004199593 | 0.305649105 |
| 112 | NKNDGp | vLGi8p | Forced expiratory volume in 1-second (FEV1), Best measure | order.Methanobacteriales.id.120                   | -0.000317587 | 0.005670013 | 0.957151121 |
| 113 | nnD7ru | vLGi8p | Forced expiratory volume in 1-second (FEV1), Best measure | genus..Eubacteriumoxidoreducensgroup.id.11339     | 0.00561339   | 0.003397665 | 0.197076283 |
| 114 | NqdTjG | vLGi8p | Forced expiratory volume in 1-second (FEV1), Best measure | genus.FamilyXIIID3011group.id.11293               | 0.003139979  | 0.004189022 | 0.472649053 |
| 115 | nQHoyD | vLGi8p | Forced expiratory volume in 1-second (FEV1), Best measure | class.Lentisphaeria.id.2250                       | 0.002533497  | 0.005709868 | 0.672808826 |
| 116 | nRNBx9 | vLGi8p | Forced expiratory volume in 1-second (FEV1), Best measure | class.Mollicutes.id.3920                          | -0.004632339 | 0.003750416 | 0.245005886 |
| 117 | O0n2Pz | vLGi8p | Forced expiratory volume in 1-second (FEV1), Best measure | family.Bacteroidaceae.id.917                      | -0.001871568 | 0.00440834  | 0.68390753  |
| 118 | obtxsV | vLGi8p | Forced expiratory volume in 1-second (FEV1), Best measure | family.Veillonellaceae.id.2172                    | 0.000976468  | 0.001453443 | 0.510719223 |
| 119 | oChqj7 | vLGi8p | Forced expiratory volume in 1-second (FEV1), Best measure | phylum.Bacteroidetes.id.905                       | 0.001670064  | 0.00321482  | 0.619436714 |
| 120 | oGD8An | vLGi8p | Forced expiratory volume in 1-second (FEV1), Best measure | order.Coriobacteriales.id.810                     | -0.005770678 | 0.005595775 | 0.32275824  |
| 121 | OhSZ6N | vLGi8p | Forced expiratory volume in 1-second (FEV1), Best measure | genus.RuminococcaceaeUCG002.id.11360              | 0.000989547  | 0.002089608 | 0.641509086 |
| 122 | olDISu | vLGi8p | Forced expiratory volume in 1-second (FEV1), Best measure | genus..Eubacteriumnodatumgroup.id.11297           | -0.003801512 | 0.004341836 | 0.404033917 |
| 123 | OtCSo3 | vLGi8p | Forced expiratory volume in 1-second (FEV1), Best measure | genus.Alloprevotella.id.961                       | -0.013552876 | 0.012271984 | 0.331392731 |
| 124 | oU56W6 | vLGi8p | Forced expiratory volume in 1-second (FEV1), Best measure | family.Peptostreptococcaceae.id.2042              | 0.003177611  | 0.002408746 | 0.213903909 |
| 125 | Oxkiqb | vLGi8p | Forced expiratory volume in 1-second (FEV1), Best measure | order.Clostridiales.id.1863                       | 0.000376351  | 0.003835898 | 0.923607556 |
| 126 | P9709V | vLGi8p | Forced expiratory volume in 1-second (FEV1), Best measure | genus..Eubacteriumhalliigroup.id.11338            | 0.001109471  | 0.001423529 | 0.448730687 |
| 127 | PcT6eJ | vLGi8p | Forced expiratory volume in 1-second (FEV1), Best measure | phylum.Cyanobacteria.id.1500                      | 0.003935541  | 0.004983481 | 0.459754809 |
| 128 | pCXx5P | vLGi8p | Forced expiratory volume in 1-second (FEV1), Best measure | genus.Phascolarctobacterium.id.2168               | -0.001329954 | 0.003943502 | 0.744604676 |
| 129 | PGIGHi | vLGi8p | Forced expiratory volume in 1-second (FEV1), Best measure | genus.LachnospiraceaeUCG008.id.11328              | 0.004292397  | 0.003797978 | 0.291144012 |
| 130 | pXAgfu | vLGi8p | Forced expiratory volume in 1-second (FEV1), Best measure | family.Acidaminococcaceae.id.2166                 | -0.004590478 | 0.00794989  | 0.588676675 |
| 131 | q1b0SE | vLGi8p | Forced expiratory volume in 1-second (FEV1), Best measure | genus.Lactobacillus.id.1837                       | 0.001028378  | 0.003241777 | 0.763890273 |
| 132 | Q3dvBY | vLGi8p | Forced expiratory volume in 1-second (FEV1), Best measure | genus.Methanobrevibacter.id.123                   | -0.00893114  | 0.006042274 | 0.235904645 |
| 133 | Q46NVk | vLGi8p | Forced expiratory volume in 1-second (FEV1), Best measure | genus.Intestinibacter.id.11345                    | -0.000436074 | 0.002431198 | 0.860643268 |
| 134 | qE3Gq8 | vLGi8p | Forced expiratory volume in 1-second (FEV1), Best measure | genus..Ruminococcustorquesgroup.id.14377          | 0.002878517  | 0.002914644 | 0.35624588  |
| 135 | qENAoR | vLGi8p | Forced expiratory volume in 1-second (FEV1), Best measure | genus.Victivallis.id.2256                         | 0.00175492   | 0.006843346 | 0.804081129 |
| 136 | QGrGNV | vLGi8p | Forced expiratory volume in 1-second (FEV1), Best measure | genus.Haemophilus.id.3698                         | -0.005123033 | 0.002161081 | 0.04956335  |
| 137 | qiWbrh | vLGi8p | Forced expiratory volume in 1-second (FEV1), Best measure | order.Selenomonadales.id.2165                     | -0.00317476  | 0.002294996 | 0.199907923 |
| 138 | QjakFr | vLGi8p | Forced expiratory volume in 1-second (FEV1), Best measure | genus.LachnospiraceaeFCS020group.id.11314         | -0.002137928 | 0.001917298 | 0.29089897  |
| 139 | Qyd7XB | vLGi8p | Forced expiratory volume in 1-second (FEV1), Best measure | genus..Eubacteriumxylanophilumgroup.id.14375      | 0.007002751  | 0.003172235 | 0.063028147 |
| 140 | R6RQXL | vLGi8p | Forced expiratory volume in 1-second (FEV1), Best measure | genus..Ruminococcusgnavusgroup.id.14376           | -0.00068623  | 0.005579972 | 0.904824729 |
| 141 | R7oLoV | vLGi8p | Forced expiratory volume in 1-second (FEV1), Best measure | genus.RuminococcaceaeUCG011.id.11368              | -0.006882949 | 0.007521525 | 0.402115662 |
| 142 | RKITkD | vLGi8p | Forced expiratory volume in 1-second (FEV1), Best measure | genus.Bifidobacterium.id.436                      | 0.004676752  | 0.004113274 | 0.284907498 |
| 143 | rlb7o5 | vLGi8p | Forced expiratory volume in 1-second (FEV1), Best measure | genus..Eubacteriumcoprostanoligenesgroup.id.11375 | -0.004224816 | 0.003130909 | 0.204329837 |
| 144 | RmoHnu | vLGi8p | Forced expiratory volume in 1-second (FEV1), Best measure | genus.Ruminiclostridium9.id.11357                 | -0.002707711 | 0.005340377 | 0.627714642 |
| 145 | rsbOlb | vLGi8p | Forced expiratory volume in 1-second (FEV1), Best measure | order.MollicutesRF9.id.11579                      | -0.000195464 | 0.002649254 | 0.942509431 |
| 146 | Rv99Lm | vLGi8p | Forced expiratory volume in 1-second (FEV1), Best measure | genus..Eubacteriumbrachygroup.id.11296            | -0.003382369 | 0.004234302 | 0.447468981 |
| 147 | sF7W2L | vLGi8p | Forced expiratory volume in 1-second (FEV1), Best measure | genus.Howardella.id.2000                          | -0.000676227 | 0.006822819 | 0.923487456 |
| 148 | sFxDb3 | vLGi8p | Forced expiratory volume in 1-second (FEV1), Best measure | order.Burkholderiales.id.2874                     | 0.004107156  | 0.004944689 | 0.430278218 |
| 149 | SgvOJ4 | vLGi8p | Forced expiratory volume in 1-second (FEV1), Best measure | family.Victivallaceae.id.2255                     | 0.003984221  | 0.004644399 | 0.411061326 |
| 150 | SpO9Ka | vLGi8p | Forced expiratory volume in 1-second (FEV1), Best measure | family.Porphryomonadaceae.id.943                  | -0.00039589  | 0.005743929 | 0.946978249 |
| 151 | staWrf | vLGi8p | Forced expiratory volume in 1-second (FEV1), Best measure | order.Rhodospirillales.id.2667                    | -0.008619964 | 0.003674534 | 0.038769046 |
| 152 | szt6bn | vLGi8p | Forced expiratory volume in 1-second (FEV1), Best measure | class.Coriobacteriia.id.809                       | -0.005770678 | 0.005595775 | 0.32275824  |
| 153 | T35lgz | vLGi8p | Forced expiratory volume in 1-second (FEV1), Best measure | family.Oxalobacteraceae.id.2966                   | 0.003262823  | 0.003584488 | 0.380604997 |

|     | A      | B      | C                                                         | D                                           | E            | F           | G           |
|-----|--------|--------|-----------------------------------------------------------|---------------------------------------------|--------------|-------------|-------------|
| 154 | T8T6Lu | vLGi8p | Forced expiratory volume in 1-second (FEV1), Best measure | family.Peptococcaceae.id.2024               | 0.002505     | 0.002373366 | 0.326273958 |
| 155 | tbXTaX | vLGi8p | Forced expiratory volume in 1-second (FEV1), Best measure | genus.ChristensenellaceaeR.7group.id.11283  | -0.001652477 | 0.004198737 | 0.704183294 |
| 156 | TGrzdF | vLGi8p | Forced expiratory volume in 1-second (FEV1), Best measure | genus..Eubacteriumfissicatenagroup.id.14373 | -0.010009759 | 0.00709008  | 0.207707888 |
| 157 | tkI5vG | vLGi8p | Forced expiratory volume in 1-second (FEV1), Best measure | genus.Slackia.id.825                        | 0.002297616  | 0.007353442 | 0.770306372 |
| 158 | TIODZI | vLGi8p | Forced expiratory volume in 1-second (FEV1), Best measure | genus.RuminococcaceaeUCG004.id.11362        | -0.003870449 | 0.007164422 | 0.605789991 |
| 159 | TQSpIB | vLGi8p | Forced expiratory volume in 1-second (FEV1), Best measure | genus.LachnospiraceaeUCG004.id.11324        | 0.004221797  | 0.00500616  | 0.42089677  |
| 160 | tSliO9 | vLGi8p | Forced expiratory volume in 1-second (FEV1), Best measure | order.Bacteroidales.id.913                  | 0.002774596  | 0.003245529 | 0.414784861 |
| 161 | TUj4LC | vLGi8p | Forced expiratory volume in 1-second (FEV1), Best measure | genus.LachnospiraceaeNC2004group.id.11316   | 0.000165962  | 0.004702278 | 0.972830733 |
| 162 | uCOF7P | vLGi8p | Forced expiratory volume in 1-second (FEV1), Best measure | order.Bacillales.id.1674                    | 0.005648923  | 0.007422254 | 0.47544778  |
| 163 | uHEy8Q | vLGi8p | Forced expiratory volume in 1-second (FEV1), Best measure | genus.Akkermansia.id.4037                   | -0.000329686 | 0.004290322 | 0.940428793 |
| 164 | uQYGEB | vLGi8p | Forced expiratory volume in 1-second (FEV1), Best measure | genus.Parabacteroides.id.954                | -0.00863493  | 0.00424867  | 0.111908682 |
| 165 | UsMxlz | vLGi8p | Forced expiratory volume in 1-second (FEV1), Best measure | class.Verrucomicrobiae.id.4029              | -0.000314255 | 0.004296419 | 0.943291749 |
| 166 | UTPK2n | vLGi8p | Forced expiratory volume in 1-second (FEV1), Best measure | class.Bacteroidia.id.912                    | 0.002774596  | 0.003245529 | 0.414784861 |
| 167 | UYJxH8 | vLGi8p | Forced expiratory volume in 1-second (FEV1), Best measure | genus.Butyrivibrio.id.1993                  | -0.002659235 | 0.004498314 | 0.564549329 |
| 168 | Vd8Fsi | vLGi8p | Forced expiratory volume in 1-second (FEV1), Best measure | genus.Bacteroides.id.918                    | -0.001871568 | 0.00440834  | 0.68390753  |
| 169 | vlyGOP | vLGi8p | Forced expiratory volume in 1-second (FEV1), Best measure | family.Ruminococcaceae.id.2050              | 0.003391385  | 0.003087485 | 0.303972752 |
| 170 | W49loY | vLGi8p | Forced expiratory volume in 1-second (FEV1), Best measure | genus.Olsenella.id.822                      | 0.005519848  | 0.004353167 | 0.236614284 |
| 171 | w5yhuV | vLGi8p | Forced expiratory volume in 1-second (FEV1), Best measure | genus.Romboutsia.id.11347                   | 0.001914212  | 0.00195878  | 0.349449616 |
| 172 | WaNFee | vLGi8p | Forced expiratory volume in 1-second (FEV1), Best measure | genus.Desulfovibrio.id.3173                 | -0.00036562  | 0.004173581 | 0.932344947 |
| 173 | WCt5pC | vLGi8p | Forced expiratory volume in 1-second (FEV1), Best measure | genus.Anaerofilum.id.2053                   | 0.009762497  | 0.004469734 | 0.056790657 |
| 174 | WEMGli | vLGi8p | Forced expiratory volume in 1-second (FEV1), Best measure | family.Alcaligenaceae.id.2875               | -0.002721128 | 0.004899984 | 0.593850456 |
| 175 | wFbl6J | vLGi8p | Forced expiratory volume in 1-second (FEV1), Best measure | genus.Marvinbryantia.id.2005                | 0.005024591  | 0.004878725 | 0.333186272 |
| 176 | wlF1Yn | vLGi8p | Forced expiratory volume in 1-second (FEV1), Best measure | genus.LachnospiraceaeUCG001.id.11321        | -0.000909041 | 0.004054668 | 0.826714422 |
| 177 | wJFco0 | vLGi8p | Forced expiratory volume in 1-second (FEV1), Best measure | genus.Veillonella.id.2198                   | 0.002999264  | 0.005943344 | 0.631803444 |
| 178 | wn5rK2 | vLGi8p | Forced expiratory volume in 1-second (FEV1), Best measure | genus.ErysipelotrichaceaeUCG003.id.11384    | -0.000447984 | 0.001985874 | 0.824784004 |
| 179 | wQYhwp | vLGi8p | Forced expiratory volume in 1-second (FEV1), Best measure | genus.Odoribacter.id.952                    | 0.002329804  | 0.005238705 | 0.675106435 |
| 180 | WvdQyb | vLGi8p | Forced expiratory volume in 1-second (FEV1), Best measure | genus..Eubacteriumeligensgroup.id.14372     | 0.004089109  | 0.004277552 | 0.383001253 |
| 181 | X4kHrP | vLGi8p | Forced expiratory volume in 1-second (FEV1), Best measure | class.Betaproteobacteria.id.2867            | 0.002264119  | 0.004749372 | 0.643807858 |
| 182 | xCuklr | vLGi8p | Forced expiratory volume in 1-second (FEV1), Best measure | genus.Dialister.id.2183                     | 0.001831098  | 0.004344378 | 0.684496403 |
| 183 | Xtktja | vLGi8p | Forced expiratory volume in 1-second (FEV1), Best measure | family.Pasteurellaceae.id.3689              | -0.002176841 | 0.001957397 | 0.287874647 |
| 184 | XTu0EY | vLGi8p | Forced expiratory volume in 1-second (FEV1), Best measure | genus.Intestinimonas.id.2062                | -0.003425978 | 0.002143105 | 0.13222634  |
| 185 | XVFzMF | vLGi8p | Forced expiratory volume in 1-second (FEV1), Best measure | genus.Holdemania.id.2157                    | 0.002089069  | 0.003676393 | 0.580350659 |
| 186 | y0FJ9U | vLGi8p | Forced expiratory volume in 1-second (FEV1), Best measure | genus.LachnospiraceaeND3007group.id.11317   | -0.052392282 | 0.021495243 | 0.247856848 |
| 187 | Y7cF3n | vLGi8p | Forced expiratory volume in 1-second (FEV1), Best measure | family.Methanobacteriaceae.id.121           | -0.000317587 | 0.005670013 | 0.957151121 |
| 188 | yakWtY | vLGi8p | Forced expiratory volume in 1-second (FEV1), Best measure | genus.Butyricoccus.id.2055                  | -0.005244596 | 0.003365235 | 0.170135808 |
| 189 | yerlNC | vLGi8p | Forced expiratory volume in 1-second (FEV1), Best measure | genus.RuminococcaceaeUCG005.id.11363        | -0.00025723  | 0.002994603 | 0.932964094 |
| 190 | yfxdv6 | vLGi8p | Forced expiratory volume in 1-second (FEV1), Best measure | family.Erysipelotrichaceae.id.2149          | 0.003848326  | 0.002907631 | 0.212508901 |
| 191 | ygbSF7 | vLGi8p | Forced expiratory volume in 1-second (FEV1), Best measure | genus.Fusicatenibacter.id.11305             | 0.004971959  | 0.003643776 | 0.191292991 |
| 192 | ylev3A | vLGi8p | Forced expiratory volume in 1-second (FEV1), Best measure | family.FamilyXIII.id.1957                   | -0.002697551 | 0.003639855 | 0.479810252 |
| 193 | yLt27i | vLGi8p | Forced expiratory volume in 1-second (FEV1), Best measure | genus.Senegalimassilia.id.11160             | -0.001325294 | 0.00381263  | 0.751094481 |
| 194 | YXZeGZ | vLGi8p | Forced expiratory volume in 1-second (FEV1), Best measure | genus.Alistipes.id.968                      | -0.002682867 | 0.004924435 | 0.59586611  |
| 195 | YYHfMs | vLGi8p | Forced expiratory volume in 1-second (FEV1), Best measure | genus.Gordonibacter.id.821                  | -0.000325574 | 0.003527763 | 0.92848996  |
| 196 | zaZf8A | vLGi8p | Forced expiratory volume in 1-second (FEV1), Best measure | genus.Oscillospira.id.2064                  | 0.001669421  | 0.006236475 | 0.79790481  |
| 197 | ZJXDpG | vLGi8p | Forced expiratory volume in 1-second (FEV1), Best measure | class.Erysipelotrichia.id.2147              | 0.003848326  | 0.002907631 | 0.212508901 |
| 198 | zkWLyI | vLGi8p | Forced expiratory volume in 1-second (FEV1), Best measure | genus.Allisonella.id.2174                   | -0.004731056 | 0.005612472 | 0.431568232 |
| 199 | 0aMbT3 | j7whIN | Forced vital capacity (FVC), Best measure                 | genus.Eggerthella.id.819                    | -0.008115576 | 0.005350475 | 0.163627074 |
| 200 | 0heWA4 | j7whIN | Forced vital capacity (FVC), Best measure                 | genus.Lactococcus.id.1851                   | -0.006008344 | 0.003918736 | 0.169084715 |
| 201 | 0IsDJy | j7whIN | Forced vital capacity (FVC), Best measure                 | genus.DefluviitaleaceaeUCG011.id.11287      | 0.002975413  | 0.00336974  | 0.406547154 |
| 202 | 0ngO8p | j7whIN | Forced vital capacity (FVC), Best measure                 | genus.Flavonifractor.id.2059                | 0.000208752  | 0.009393052 | 0.983664769 |
| 203 | 0rTnk2 | j7whIN | Forced vital capacity (FVC), Best measure                 | genus.Lachnospira.id.2004                   | -0.001941521 | 0.0081799   | 0.824044402 |
| 204 | 0rWmph | j7whIN | Forced vital capacity (FVC), Best measure                 | phylum.Firmicutes.id.1672                   | -0.002078585 | 0.002733612 | 0.459642219 |

|     | A      | B      | C                                         | D                                           | E            | F           | G           |
|-----|--------|--------|-------------------------------------------|---------------------------------------------|--------------|-------------|-------------|
| 205 | 0Vfsi1 | j7whIN | Forced vital capacity (FVC), Best measure | genus.Hungatella.id.11306                   | 0.006931827  | 0.006831737 | 0.384988501 |
| 206 | 1rpkul | j7whIN | Forced vital capacity (FVC), Best measure | genus.FamilyXIIIUCG001.id.11294             | -0.005595236 | 0.00347205  | 0.158195236 |
| 207 | 1uqUdL | j7whIN | Forced vital capacity (FVC), Best measure | genus.Escherichia.Shigella.id.3504          | -0.000690412 | 0.002106588 | 0.75152119  |
| 208 | 1zf0TZ | j7whIN | Forced vital capacity (FVC), Best measure | family.Streptococcaceae.id.1850             | 0.00692384   | 0.004546407 | 0.158753393 |
| 209 | 20HL0T | j7whIN | Forced vital capacity (FVC), Best measure | genus.Holdemanella.id.11393                 | 0.003008088  | 0.002183473 | 0.201594441 |
| 210 | 2GJP3o | j7whIN | Forced vital capacity (FVC), Best measure | genus.Ruminococcus2.id.11374                | -0.002676689 | 0.001776701 | 0.157789987 |
| 211 | 2neTKK | j7whIN | Forced vital capacity (FVC), Best measure | phylum.Euryarchaeota.id.55                  | 0.002474611  | 0.003367615 | 0.481152876 |
| 212 | 2vslhf | j7whIN | Forced vital capacity (FVC), Best measure | genus.Coprococcus2.id.11302                 | 0.015210627  | 0.007340283 | 0.083631002 |
| 213 | 31r1VV | j7whIN | Forced vital capacity (FVC), Best measure | family.Christensenellaceae.id.1866          | 0.000431199  | 0.002391876 | 0.860929591 |
| 214 | 37ZEpl | j7whIN | Forced vital capacity (FVC), Best measure | genus..Eubacteriumrectalegroup.id.14374     | 0.006299954  | 0.003734222 | 0.142557992 |
| 215 | 3cOJ1f | j7whIN | Forced vital capacity (FVC), Best measure | class.Actinobacteria.id.419                 | -0.000270952 | 0.002923442 | 0.927822296 |
| 216 | 3Oo7Td | j7whIN | Forced vital capacity (FVC), Best measure | class.Methanobacteria.id.119                | 0.002490008  | 0.004660692 | 0.612369706 |
| 217 | 3tgfXE | j7whIN | Forced vital capacity (FVC), Best measure | genus.Subdoligranulum.id.2070               | -0.001373739 | 0.00260484  | 0.612238514 |
| 218 | 4zBtt2 | j7whIN | Forced vital capacity (FVC), Best measure | genus.Bilophila.id.3170                     | -0.004279695 | 0.003670745 | 0.270711974 |
| 219 | 5IXuob | j7whIN | Forced vital capacity (FVC), Best measure | genus.RuminococcaceaeUCG014.id.11371        | -8.96478E-05 | 0.002366483 | 0.970608494 |
| 220 | 5qEcKL | j7whIN | Forced vital capacity (FVC), Best measure | genus.Streptococcus.id.1853                 | 0.007242048  | 0.003694224 | 0.073584856 |
| 221 | 5TNOZ7 | j7whIN | Forced vital capacity (FVC), Best measure | genus.Oscillibacter.id.2063                 | 0.001412301  | 0.002601686 | 0.60042239  |
| 222 | 5XtLwc | j7whIN | Forced vital capacity (FVC), Best measure | genus.Catenibacterium.id.2153               | -0.014414595 | 0.008856871 | 0.202110722 |
| 223 | 6gX3qe | j7whIN | Forced vital capacity (FVC), Best measure | phylum.Tenericutes.id.3919                  | -0.006115668 | 0.003055241 | 0.073180762 |
| 224 | 6jMcBB | j7whIN | Forced vital capacity (FVC), Best measure | family.Desulfovibrionaceae.id.3169          | -0.001643571 | 0.002108453 | 0.458114185 |
| 225 | 6mlWxZ | j7whIN | Forced vital capacity (FVC), Best measure | genus.Copro bacter.id.949                   | -0.00249779  | 0.00317113  | 0.451137381 |
| 226 | 77YJKV | j7whIN | Forced vital capacity (FVC), Best measure | genus..Eubacteriumruminantiumgroup.id.11340 | -0.001030992 | 0.002299802 | 0.65995091  |
| 227 | 7aTYpg | j7whIN | Forced vital capacity (FVC), Best measure | genus.Collinsella.id.815                    | 0.002561833  | 0.003043256 | 0.427715725 |
| 228 | 7dqLOH | j7whIN | Forced vital capacity (FVC), Best measure | genus..Clostridiuminnocuumgroup.id.14397    | -0.001874993 | 0.004072022 | 0.659150434 |
| 229 | 7ioeKt | j7whIN | Forced vital capacity (FVC), Best measure | phylum.Proteobacteria.id.2375               | -0.000999946 | 0.003005556 | 0.746979796 |
| 230 | 80h8vf | j7whIN | Forced vital capacity (FVC), Best measure | genus.Anaerostipes.id.1991                  | -0.000689597 | 0.002953472 | 0.820093542 |
| 231 | 8jKldu | j7whIN | Forced vital capacity (FVC), Best measure | genus.Coprococcus3.id.11303                 | -0.00309459  | 0.00334694  | 0.385937016 |
| 232 | 8NULRM | j7whIN | Forced vital capacity (FVC), Best measure | genus.Paraprevotella.id.962                 | -0.000944867 | 0.00295632  | 0.755841702 |
| 233 | 9i4tiU | j7whIN | Forced vital capacity (FVC), Best measure | order.Gastranaerophilales.id.1591           | -0.006540079 | 0.003491393 | 0.103191578 |
| 234 | 9s731W | j7whIN | Forced vital capacity (FVC), Best measure | genus.RuminococcaceaeUCG009.id.11366        | -0.003381626 | 0.003450244 | 0.350147227 |
| 235 | acLMuF | j7whIN | Forced vital capacity (FVC), Best measure | genus.Parasutterella.id.2892                | 0.003423778  | 0.003311802 | 0.321610003 |
| 236 | AdsBD9 | j7whIN | Forced vital capacity (FVC), Best measure | genus.Turicibacter.id.2162                  | -3.62665E-06 | 0.003812142 | 0.999264234 |
| 237 | aGfu8V | j7whIN | Forced vital capacity (FVC), Best measure | order.Bifidobacteriales.id.432              | -0.002189829 | 0.005483326 | 0.70007625  |
| 238 | AK0l7A | j7whIN | Forced vital capacity (FVC), Best measure | genus.LachnospiraceaeUCG010.id.11330        | -0.002908428 | 0.002374662 | 0.255497187 |
| 239 | aKuChq | j7whIN | Forced vital capacity (FVC), Best measure | genus.Faecalibacterium.id.2057              | 0.000904986  | 0.00380114  | 0.818635822 |
| 240 | aKXyAu | j7whIN | Forced vital capacity (FVC), Best measure | genus.Blautia.id.1992                       | -0.002246543 | 0.001836188 | 0.249194309 |
| 241 | AN8qjo | j7whIN | Forced vital capacity (FVC), Best measure | genus.Clostridiumsensustricto1.id.1873      | -0.002920855 | 0.004171195 | 0.515008914 |
| 242 | anDrA2 | j7whIN | Forced vital capacity (FVC), Best measure | genus..Eubacteriumventriosumgroup.id.11341  | -0.004306891 | 0.004040039 | 0.307379615 |
| 243 | ASQ2fp | j7whIN | Forced vital capacity (FVC), Best measure | genus.RuminococcaceaeNK4A214group.id.11358  | -0.004173317 | 0.003240203 | 0.224187857 |
| 244 | aToCrK | j7whIN | Forced vital capacity (FVC), Best measure | genus.Anaerotruncus.id.2054                 | 0.002110823  | 0.00358362  | 0.567747153 |
| 245 | axDRMS | j7whIN | Forced vital capacity (FVC), Best measure | family.Prevotellaceae.id.960                | 0.002311093  | 0.002087447 | 0.2882998   |
| 246 | AXpdwL | j7whIN | Forced vital capacity (FVC), Best measure | family.Verrucomicrobiaceae.id.4036          | -0.002632913 | 0.004144847 | 0.541092868 |
| 247 | B5jn0Y | j7whIN | Forced vital capacity (FVC), Best measure | genus.Roseburia.id.2012                     | -0.002626144 | 0.002658069 | 0.344391932 |
| 248 | BiKMtW | j7whIN | Forced vital capacity (FVC), Best measure | genus.Sutterella.id.2896                    | -0.002215794 | 0.005525655 | 0.696853528 |
| 249 | BLC7wV | j7whIN | Forced vital capacity (FVC), Best measure | genus.RuminococcaceaeUCG013.id.11370        | -0.003466532 | 0.003706683 | 0.371712816 |
| 250 | BLSFBU | j7whIN | Forced vital capacity (FVC), Best measure | family.Rikenellaceae.id.967                 | -0.002691683 | 0.00182245  | 0.157972141 |
| 251 | BPW89n | j7whIN | Forced vital capacity (FVC), Best measure | order.Verrucomicrobiales.id.4030            | -0.002642813 | 0.004144819 | 0.539602717 |
| 252 | BtOkEx | j7whIN | Forced vital capacity (FVC), Best measure | genus.LachnospiraceaeNK4A136group.id.11319  | -0.002637734 | 0.001348929 | 0.076407527 |
| 253 | Bt1upE | j7whIN | Forced vital capacity (FVC), Best measure | family.Rhodospirillaceae.id.2717            | -0.005735011 | 0.004717673 | 0.247495309 |
| 254 | C1xV1V | j7whIN | Forced vital capacity (FVC), Best measure | order.Victivallales.id.2254                 | 0.002857273  | 0.00461387  | 0.558498451 |
| 255 | c62fwk | j7whIN | Forced vital capacity (FVC), Best measure | genus.Sellimonas.id.14369                   | -0.000233933 | 0.006732868 | 0.973410235 |

|     | A      | B      | C                                         | D                                           | E            | F           | G           |
|-----|--------|--------|-------------------------------------------|---------------------------------------------|--------------|-------------|-------------|
| 256 | cqFLTQ | j7whIN | Forced vital capacity (FVC), Best measure | genus.Coproccocus1.id.11301                 | -0.003567345 | 0.001683671 | 0.060146014 |
| 257 | CUtsMo | j7whIN | Forced vital capacity (FVC), Best measure | family.ClostridialesvadinBB60group.id.11286 | 0.00174025   | 0.002677033 | 0.527898413 |
| 258 | CYNr8c | j7whIN | Forced vital capacity (FVC), Best measure | order.Actinomycetales.id.420                | -0.001032238 | 0.002752518 | 0.732591497 |
| 259 | d9u3Wa | j7whIN | Forced vital capacity (FVC), Best measure | family.Lactobacillaceae.id.1836             | 0.000753396  | 0.004050871 | 0.858586028 |
| 260 | dP6VTT | j7whIN | Forced vital capacity (FVC), Best measure | class.Alphaproteobacteria.id.2379           | -0.001693311 | 0.003709171 | 0.667162306 |
| 261 | dSCeM7 | j7whIN | Forced vital capacity (FVC), Best measure | order.Enterobacteriales.id.3468             | 0.008951202  | 0.005693426 | 0.176710112 |
| 262 | DwGyne | j7whIN | Forced vital capacity (FVC), Best measure | family.BacteroidalesS24.7group.id.11173     | 0.005329712  | 0.003718443 | 0.201751163 |
| 263 | E1ZDX3 | j7whIN | Forced vital capacity (FVC), Best measure | genus.Oxalobacter.id.2978                   | 0.00834977   | 0.005398131 | 0.15631782  |
| 264 | e5mJnF | j7whIN | Forced vital capacity (FVC), Best measure | genus.Dorea.id.1997                         | -0.001333478 | 0.002662919 | 0.630025856 |
| 265 | ebP4zV | j7whIN | Forced vital capacity (FVC), Best measure | genus.Ruminococcus1.id.11373                | 1.0289E-05   | 0.002616517 | 0.996958748 |
| 266 | FcqSNY | j7whIN | Forced vital capacity (FVC), Best measure | family.Clostridiaceae1.id.1869              | -0.005712173 | 0.003770841 | 0.168280495 |
| 267 | fE3r8h | j7whIN | Forced vital capacity (FVC), Best measure | phylum.Verrucomicrobia.id.3982              | -0.003746457 | 0.003823918 | 0.350320626 |
| 268 | FFi1Rd | j7whIN | Forced vital capacity (FVC), Best measure | family.Actinomycetaceae.id.421              | -0.001047839 | 0.00275296  | 0.728835957 |
| 269 | FIVBaS | j7whIN | Forced vital capacity (FVC), Best measure | order.Erysipelotrichales.id.2148            | 0.003459213  | 0.002811418 | 0.244204787 |
| 270 | Fr2Ff4 | j7whIN | Forced vital capacity (FVC), Best measure | class.Clostridia.id.1859                    | -0.000541517 | 0.005173079 | 0.918699717 |
| 271 | FRQYhm | j7whIN | Forced vital capacity (FVC), Best measure | class.Gammaproteobacteria.id.3303           | -0.006504421 | 0.003265656 | 0.103017354 |
| 272 | FT7OrH | j7whIN | Forced vital capacity (FVC), Best measure | genus.Actinomyces.id.423                    | -0.004680787 | 0.003500642 | 0.238786606 |
| 273 | FXBXNG | j7whIN | Forced vital capacity (FVC), Best measure | family.FamilyXI.id.1936                     | 0.007101861  | 0.004781875 | 0.188041964 |
| 274 | gkAVOW | j7whIN | Forced vital capacity (FVC), Best measure | phylum.Lentisphaerae.id.2238                | 0.003033453  | 0.004354602 | 0.50851222  |
| 275 | GNp2YQ | j7whIN | Forced vital capacity (FVC), Best measure | genus..Ruminococcusgauvreauigroup.id.11342  | 0.000149796  | 0.005636966 | 0.979322412 |
| 276 | hUph1f | j7whIN | Forced vital capacity (FVC), Best measure | genus.RikenellaceaeRC9gutgroup.id.11191     | 0.004781699  | 0.006355724 | 0.471061537 |
| 277 | l2CEyx | j7whIN | Forced vital capacity (FVC), Best measure | genus.Tyzzrella3.id.11335                   | 0.007793531  | 0.005131858 | 0.159811295 |
| 278 | l5XXsr | j7whIN | Forced vital capacity (FVC), Best measure | genus.Prevotella9.id.11183                  | -7.4337E-05  | 0.004293849 | 0.986471877 |
| 279 | iAhkfC | j7whIN | Forced vital capacity (FVC), Best measure | genus.Erysipelatoclostridium.id.11381       | -0.001480136 | 0.002249786 | 0.52208187  |
| 280 | IgBtIU | j7whIN | Forced vital capacity (FVC), Best measure | class.Bacilli.id.1673                       | -0.001523934 | 0.002079085 | 0.474868503 |
| 281 | lI0qrp | j7whIN | Forced vital capacity (FVC), Best measure | phylum.Actinobacteria.id.400                | 0.006142321  | 0.003491211 | 0.103960827 |
| 282 | iMGTCd | j7whIN | Forced vital capacity (FVC), Best measure | genus.Ruminiclostridium5.id.11355           | 2.02013E-05  | 0.003190195 | 0.995102653 |
| 283 | iwPblH | j7whIN | Forced vital capacity (FVC), Best measure | genus.Ruminiclostridium6.id.11356           | 0.001273461  | 0.001986474 | 0.532619171 |
| 284 | j0mByl | j7whIN | Forced vital capacity (FVC), Best measure | order.NB1n.id.3953                          | -0.003951645 | 0.003807723 | 0.321639532 |
| 285 | j4g0ZV | j7whIN | Forced vital capacity (FVC), Best measure | genus.CandidatusSoleaferrea.id.11350        | -0.001968511 | 0.015340861 | 0.901505978 |
| 286 | j87dXS | j7whIN | Forced vital capacity (FVC), Best measure | genus.Eisenbergiella.id.11304               | -0.001839172 | 0.006970083 | 0.797825152 |
| 287 | jfZByg | j7whIN | Forced vital capacity (FVC), Best measure | order.Lactobacillales.id.1800               | -0.000812121 | 0.0020581   | 0.700063202 |
| 288 | JHChB7 | j7whIN | Forced vital capacity (FVC), Best measure | genus.Adlercreutzia.id.812                  | -0.006260931 | 0.007398274 | 0.429855681 |
| 289 | jHia6Z | j7whIN | Forced vital capacity (FVC), Best measure | order.Pasteurellales.id.3688                | -0.00130019  | 0.002353288 | 0.590749145 |
| 290 | jJC3Fm | j7whIN | Forced vital capacity (FVC), Best measure | genus.Enterorhabdus.id.820                  | -0.004488331 | 0.005900032 | 0.489193364 |
| 291 | jUcEpg | j7whIN | Forced vital capacity (FVC), Best measure | genus.Butyricimonas.id.945                  | -0.007442194 | 0.004537958 | 0.132043768 |
| 292 | kjA5PB | j7whIN | Forced vital capacity (FVC), Best measure | genus.RuminococcaceaeUCG010.id.11367        | -0.000931414 | 0.002796604 | 0.755820229 |
| 293 | kodRd1 | j7whIN | Forced vital capacity (FVC), Best measure | family.Defluviitaleaceae.id.1924            | 0.002582253  | 0.002614991 | 0.349209525 |
| 294 | LCZ8yH | j7whIN | Forced vital capacity (FVC), Best measure | genus.Prevotella7.id.11182                  | -0.003556164 | 0.006924999 | 0.619952074 |
| 295 | lJcL8y | j7whIN | Forced vital capacity (FVC), Best measure | genus.RuminococcaceaeUCG003.id.11361        | 0.001335193  | 0.003438389 | 0.705918544 |
| 296 | LKYg6S | j7whIN | Forced vital capacity (FVC), Best measure | genus.Terrisporobacter.id.11348             | -0.001799624 | 0.00343431  | 0.636519057 |
| 297 | LRKdia | j7whIN | Forced vital capacity (FVC), Best measure | family.Bifidobacteriaceae.id.433            | -0.002189829 | 0.005483326 | 0.70007625  |
| 298 | m0ByAU | j7whIN | Forced vital capacity (FVC), Best measure | order.Desulfovibrionales.id.3156            | -0.001896403 | 0.001892591 | 0.339966083 |
| 299 | m9LXEq | j7whIN | Forced vital capacity (FVC), Best measure | family.Enterobacteriaceae.id.3469           | 0.008951202  | 0.005693426 | 0.176710112 |
| 300 | MBOR7Y | j7whIN | Forced vital capacity (FVC), Best measure | family.Coriobacteriaceae.id.811             | -0.006086138 | 0.004692942 | 0.219057731 |
| 301 | MpL626 | j7whIN | Forced vital capacity (FVC), Best measure | genus.Lachnoclostridium.id.11308            | -0.008792512 | 0.003355153 | 0.023803168 |
| 302 | Msb4zz | j7whIN | Forced vital capacity (FVC), Best measure | class.Melainabacteria.id.1589               | -0.001729159 | 0.003306887 | 0.615215127 |
| 303 | MXS84H | j7whIN | Forced vital capacity (FVC), Best measure | class.Negativicutes.id.2164                 | -0.002761461 | 0.002219056 | 0.244771927 |
| 304 | mz9jd0 | j7whIN | Forced vital capacity (FVC), Best measure | genus.Barnesiella.id.944                    | 0.004723159  | 0.003623004 | 0.216805823 |
| 305 | n3j0op | j7whIN | Forced vital capacity (FVC), Best measure | class.Deltaproteobacteria.id.3087           | -0.001081536 | 0.00187471  | 0.575617561 |
| 306 | nFIaU5 | j7whIN | Forced vital capacity (FVC), Best measure | family.Lachnospiraceae.id.1987              | 0.000589188  | 0.00227638  | 0.799287056 |

|     | A      | B      | C                                         | D                                                 | E            | F           | G           |
|-----|--------|--------|-------------------------------------------|---------------------------------------------------|--------------|-------------|-------------|
| 307 | nlesEv | j7whIN | Forced vital capacity (FVC), Best measure | genus.Peptococcus.id.2037                         | 0.001647177  | 0.003340211 | 0.632565774 |
| 308 | NKNDGp | j7whIN | Forced vital capacity (FVC), Best measure | order.Methanobacteriales.id.120                   | 0.002490008  | 0.004660692 | 0.612369706 |
| 309 | nnD7ru | j7whIN | Forced vital capacity (FVC), Best measure | genus..Eubacteriumoxidoreducensgroup.id.11339     | 0.007092883  | 0.003285232 | 0.119685987 |
| 310 | NqdTjG | j7whIN | Forced vital capacity (FVC), Best measure | genus.FamilyXIIID3011group.id.11293               | 0.001994867  | 0.003882814 | 0.619788915 |
| 311 | nQHoyD | j7whIN | Forced vital capacity (FVC), Best measure | class.Lentisphaeria.id.2250                       | 0.002857273  | 0.00461387  | 0.558498451 |
| 312 | nRNBx9 | j7whIN | Forced vital capacity (FVC), Best measure | class.Mollicutes.id.3920                          | -0.006115668 | 0.003055241 | 0.073180762 |
| 313 | O0n2Pz | j7whIN | Forced vital capacity (FVC), Best measure | family.Bacteroidaceae.id.917                      | -0.003733957 | 0.004262457 | 0.41007574  |
| 314 | obtxsV | j7whIN | Forced vital capacity (FVC), Best measure | family.Veillonellaceae.id.2172                    | 0.000343905  | 0.001431765 | 0.813050601 |
| 315 | oChqj7 | j7whIN | Forced vital capacity (FVC), Best measure | phylum.Bacteroidetes.id.905                       | 0.002188285  | 0.003467915 | 0.548076201 |
| 316 | oGD8An | j7whIN | Forced vital capacity (FVC), Best measure | order.Coriobacteriales.id.810                     | -0.006086138 | 0.004692942 | 0.219057731 |
| 317 | OhSZ6N | j7whIN | Forced vital capacity (FVC), Best measure | genus.RuminococcaceaeUCG002.id.11360              | 0.001725914  | 0.001599868 | 0.294928116 |
| 318 | oDISu  | j7whIN | Forced vital capacity (FVC), Best measure | genus..Eubacteriumnodatumgroup.id.11297           | -0.005862906 | 0.004751591 | 0.248495979 |
| 319 | OtCSo3 | j7whIN | Forced vital capacity (FVC), Best measure | genus.Alloprevotella.id.961                       | -0.012397507 | 0.013604626 | 0.413702386 |
| 320 | oU56W6 | j7whIN | Forced vital capacity (FVC), Best measure | family.Peptostreptococcaceae.id.2042              | 0.004545303  | 0.002292437 | 0.072927051 |
| 321 | Oxkiqb | j7whIN | Forced vital capacity (FVC), Best measure | order.Clostridiales.id.1863                       | 0.000238687  | 0.004273255 | 0.956458142 |
| 322 | P9709V | j7whIN | Forced vital capacity (FVC), Best measure | genus..Eubacteriumhalliigroup.id.11338            | -0.000527718 | 0.00136438  | 0.704732755 |
| 323 | PcT6eJ | j7whIN | Forced vital capacity (FVC), Best measure | phylum.Cyanobacteria.id.1500                      | 0.003925811  | 0.004878968 | 0.451724351 |
| 324 | pCXx5P | j7whIN | Forced vital capacity (FVC), Best measure | genus.Phascolarctobacterium.id.2168               | -0.003168982 | 0.003813001 | 0.430022691 |
| 325 | PGIGHi | j7whIN | Forced vital capacity (FVC), Best measure | genus.LachnospiraceaeUCG008.id.11328              | 0.00244572   | 0.003672301 | 0.524152017 |
| 326 | pXAgfu | j7whIN | Forced vital capacity (FVC), Best measure | family.Acidaminococcaceae.id.2166                 | -0.005218573 | 0.006866369 | 0.481522063 |
| 327 | q1bO5E | j7whIN | Forced vital capacity (FVC), Best measure | genus.Lactobacillus.id.1837                       | -0.00035214  | 0.00372543  | 0.928364628 |
| 328 | Q3dvBY | j7whIN | Forced vital capacity (FVC), Best measure | genus.Methanobrevibacter.id.123                   | -0.007525316 | 0.005087537 | 0.235644494 |
| 329 | Q46NVk | j7whIN | Forced vital capacity (FVC), Best measure | genus.Intestinibacter.id.11345                    | -0.000688178 | 0.00241237  | 0.78030082  |
| 330 | qE3Gq8 | j7whIN | Forced vital capacity (FVC), Best measure | genus..Ruminococcustorquesgroup.id.14377          | 0.002142755  | 0.00205226  | 0.3311512   |
| 331 | qENaOR | j7whIN | Forced vital capacity (FVC), Best measure | genus.Victivallis.id.2256                         | 0.003959411  | 0.006707908 | 0.571308651 |
| 332 | QGrGNV | j7whIN | Forced vital capacity (FVC), Best measure | genus.Haemophilus.id.3698                         | -0.005509765 | 0.002122824 | 0.03565864  |
| 333 | qiWbrh | j7whIN | Forced vital capacity (FVC), Best measure | order.Selenomonadales.id.2165                     | -0.002761461 | 0.002219056 | 0.244771927 |
| 334 | QjakFr | j7whIN | Forced vital capacity (FVC), Best measure | genus.LachnospiraceaeFCS020group.id.11314         | -0.000931441 | 0.002267479 | 0.689895924 |
| 335 | Qyd7XB | j7whIN | Forced vital capacity (FVC), Best measure | genus..Eubacteriumxylanophilumgroup.id.14375      | 0.010038782  | 0.003361659 | 0.020333787 |
| 336 | R6RQXL | j7whIN | Forced vital capacity (FVC), Best measure | genus..Ruminococcusgnavusgroup.id.14376           | -0.002571434 | 0.005399582 | 0.645260077 |
| 337 | R7oLoV | j7whIN | Forced vital capacity (FVC), Best measure | genus.RuminococcaceaeUCG011.id.11368              | -0.008761968 | 0.006841609 | 0.256490811 |
| 338 | RKlTkD | j7whIN | Forced vital capacity (FVC), Best measure | genus.Bifidobacterium.id.436                      | 0.004146795  | 0.003400869 | 0.253708499 |
| 339 | rlb7o5 | j7whIN | Forced vital capacity (FVC), Best measure | genus..Eubacteriumcoprostanoligenesgroup.id.11375 | -0.003495211 | 0.002920267 | 0.256511368 |
| 340 | RmoHnu | j7whIN | Forced vital capacity (FVC), Best measure | genus.Ruminiclostridium9.id.11357                 | -0.005758192 | 0.005451315 | 0.325919826 |
| 341 | rsbOlB | j7whIN | Forced vital capacity (FVC), Best measure | order.MollicutesRF9.id.11579                      | -0.001058564 | 0.002763423 | 0.708972695 |
| 342 | Rv99Lm | j7whIN | Forced vital capacity (FVC), Best measure | genus..Eubacteriumbrachygroup.id.11296            | -0.002395719 | 0.004357655 | 0.597484521 |
| 343 | sF7W2L | j7whIN | Forced vital capacity (FVC), Best measure | genus.Howardella.id.2000                          | 0.001553245  | 0.006590848 | 0.819612186 |
| 344 | sFxDb3 | j7whIN | Forced vital capacity (FVC), Best measure | order.Burkholderiales.id.2874                     | 0.003225014  | 0.004251409 | 0.469862793 |
| 345 | Sgv0J4 | j7whIN | Forced vital capacity (FVC), Best measure | family.Victivallaceae.id.2255                     | 0.005372287  | 0.004159867 | 0.225597409 |
| 346 | SpO9Ka | j7whIN | Forced vital capacity (FVC), Best measure | family.Porphyromonadaceae.id.943                  | -0.001977103 | 0.004100236 | 0.644381078 |
| 347 | staWrf | j7whIN | Forced vital capacity (FVC), Best measure | order.Rhodospirillales.id.2667                    | -0.004877478 | 0.003871599 | 0.233810815 |
| 348 | szt6bn | j7whIN | Forced vital capacity (FVC), Best measure | class.Coriobacteriia.id.809                       | -0.006086138 | 0.004692942 | 0.219057731 |
| 349 | T35lgz | j7whIN | Forced vital capacity (FVC), Best measure | family.Oxalobacteraceae.id.2966                   | 0.001724197  | 0.00371577  | 0.650937248 |
| 350 | T8T6Lu | j7whIN | Forced vital capacity (FVC), Best measure | family.Peptococcaceae.id.2024                     | 0.001598304  | 0.002061553 | 0.463548865 |
| 351 | tbXTaX | j7whIN | Forced vital capacity (FVC), Best measure | genus.ChristensenellaceaeR.7group.id.11283        | -0.001840846 | 0.002997918 | 0.556242368 |
| 352 | TGrzdF | j7whIN | Forced vital capacity (FVC), Best measure | genus..Eubacteriumfissicatenaingroup.id.14373     | -0.009394207 | 0.007656168 | 0.265776151 |
| 353 | tkI5vG | j7whIN | Forced vital capacity (FVC), Best measure | genus.Slackia.id.825                              | 0.001453371  | 0.005636027 | 0.809229724 |
| 354 | TIODZI | j7whIN | Forced vital capacity (FVC), Best measure | genus.RuminococcaceaeUCG004.id.11362              | -0.007682781 | 0.00675552  | 0.292855864 |
| 355 | TQSPiB | j7whIN | Forced vital capacity (FVC), Best measure | genus.LachnospiraceaeUCG004.id.11324              | 0.003528696  | 0.004482607 | 0.451397824 |
| 356 | tSIiO9 | j7whIN | Forced vital capacity (FVC), Best measure | order.Bacteroidales.id.913                        | 0.00205958   | 0.003236493 | 0.54038515  |
| 357 | TUj4LC | j7whIN | Forced vital capacity (FVC), Best measure | genus.LachnospiraceaeNC2004group.id.11316         | 0.000601391  | 0.005054251 | 0.908628276 |

|     | A      | B      | C                                                                 | D                                         | E            | F           | G           |
|-----|--------|--------|-------------------------------------------------------------------|-------------------------------------------|--------------|-------------|-------------|
| 358 | uCOF7P | j7whIN | Forced vital capacity (FVC), Best measure                         | order.Bacillales.id.1674                  | 0.002416629  | 0.006629434 | 0.727964993 |
| 359 | uHEy8Q | j7whIN | Forced vital capacity (FVC), Best measure                         | genus.Akkermansia.id.4037                 | -0.002653587 | 0.004137859 | 0.537318142 |
| 360 | uQYGEB | j7whIN | Forced vital capacity (FVC), Best measure                         | genus.Parabacteroides.id.954              | -0.011930473 | 0.004108068 | 0.043934535 |
| 361 | UsMxlz | j7whIN | Forced vital capacity (FVC), Best measure                         | class.Verrucomicrobiae.id.4029            | -0.002642813 | 0.004144819 | 0.539602717 |
| 362 | UTPK2n | j7whIN | Forced vital capacity (FVC), Best measure                         | class.Bacteroidia.id.912                  | 0.00205958   | 0.003236493 | 0.54038515  |
| 363 | UYJxH8 | j7whIN | Forced vital capacity (FVC), Best measure                         | genus.Butyrivibrio.id.1993                | -0.003681744 | 0.003886239 | 0.360723924 |
| 364 | Vd8Fsi | j7whIN | Forced vital capacity (FVC), Best measure                         | genus.Bacteroides.id.918                  | -0.003733957 | 0.004262457 | 0.41007574  |
| 365 | vlyGOP | j7whIN | Forced vital capacity (FVC), Best measure                         | family.Ruminococcaceae.id.2050            | 0.002750845  | 0.002751959 | 0.34677788  |
| 366 | W49loY | j7whIN | Forced vital capacity (FVC), Best measure                         | genus.Olsenella.id.822                    | 0.002677202  | 0.00436678  | 0.554995434 |
| 367 | w5yhuV | j7whIN | Forced vital capacity (FVC), Best measure                         | genus.Romboutsia.id.11347                 | 0.003054912  | 0.001893962 | 0.135046183 |
| 368 | WaNFee | j7whIN | Forced vital capacity (FVC), Best measure                         | genus.Desulfovibrio.id.3173               | -0.000839743 | 0.003891137 | 0.834537269 |
| 369 | Wct5pC | j7whIN | Forced vital capacity (FVC), Best measure                         | genus.Anaerofilum.id.2053                 | 0.011408975  | 0.003800835 | 0.014915146 |
| 370 | WEMGli | j7whIN | Forced vital capacity (FVC), Best measure                         | family.Alcaligenaceae.id.2875             | -0.006702892 | 0.004466997 | 0.171867269 |
| 371 | wFbL6J | j7whIN | Forced vital capacity (FVC), Best measure                         | genus.Marvinbryantia.id.2005              | 0.004069457  | 0.004241339 | 0.365416063 |
| 372 | wlF1Yn | j7whIN | Forced vital capacity (FVC), Best measure                         | genus.LachnospiraceaeUCG001.id.11321      | -0.000548355 | 0.004478106 | 0.90474925  |
| 373 | wJFco0 | j7whIN | Forced vital capacity (FVC), Best measure                         | genus.Veillonella.id.2198                 | 0.000668413  | 0.006591769 | 0.922535769 |
| 374 | wn5rK2 | j7whIN | Forced vital capacity (FVC), Best measure                         | genus.ErysipelotrichaceaeUCG003.id.11384  | -0.001552337 | 0.002185402 | 0.48916927  |
| 375 | wQYhwp | j7whIN | Forced vital capacity (FVC), Best measure                         | genus.Odoribacter.id.952                  | 0.003914557  | 0.005672979 | 0.520885692 |
| 376 | WvdQyb | j7whIN | Forced vital capacity (FVC), Best measure                         | genus..Eubacteriumeligensgroup.id.14372   | 0.007546279  | 0.004136007 | 0.127662461 |
| 377 | X4kHrP | j7whIN | Forced vital capacity (FVC), Best measure                         | class.Betaproteobacteria.id.2867          | 0.002054053  | 0.00394031  | 0.613511178 |
| 378 | xCuklr | j7whIN | Forced vital capacity (FVC), Best measure                         | genus.Dialister.id.2183                   | 0.00191755   | 0.003543113 | 0.603106683 |
| 379 | Xtktja | j7whIN | Forced vital capacity (FVC), Best measure                         | family.Pasteurellaceae.id.3689            | -0.00130019  | 0.002353288 | 0.590749145 |
| 380 | XTu0EY | j7whIN | Forced vital capacity (FVC), Best measure                         | genus.Intestinimonas.id.2062              | -0.002633179 | 0.0018583   | 0.178356072 |
| 381 | XVFzMF | j7whIN | Forced vital capacity (FVC), Best measure                         | genus.Holdemania.id.2157                  | 0.002675014  | 0.003503369 | 0.459881911 |
| 382 | y0FJ9U | j7whIN | Forced vital capacity (FVC), Best measure                         | genus.LachnospiraceaeND3007group.id.11317 | -0.066112733 | 0.020783866 | 0.193906536 |
| 383 | Y7cF3n | j7whIN | Forced vital capacity (FVC), Best measure                         | family.Methanobacteriaceae.id.121         | 0.002490008  | 0.004660692 | 0.612369706 |
| 384 | yakWtY | j7whIN | Forced vital capacity (FVC), Best measure                         | genus.Butyridicoccus.id.2055              | -0.005203209 | 0.003020275 | 0.135705931 |
| 385 | yerINC | j7whIN | Forced vital capacity (FVC), Best measure                         | genus.RuminococcaceaeUCG005.id.11363      | -0.0012062   | 0.002602079 | 0.651263606 |
| 386 | yfxJv6 | j7whIN | Forced vital capacity (FVC), Best measure                         | family.Erysipelotrichaceae.id.2149        | 0.003459213  | 0.002811418 | 0.244204787 |
| 387 | ygbSF7 | j7whIN | Forced vital capacity (FVC), Best measure                         | genus.Fusicatenibacter.id.11305           | 0.004907072  | 0.00391759  | 0.228359979 |
| 388 | ylev3A | j7whIN | Forced vital capacity (FVC), Best measure                         | family.FamilyXIII.id.1957                 | -0.002014378 | 0.004249453 | 0.648144715 |
| 389 | yLt27i | j7whIN | Forced vital capacity (FVC), Best measure                         | genus.Senegalimassilia.id.11160           | -0.003642164 | 0.005689562 | 0.56761326  |
| 390 | YXZeGZ | j7whIN | Forced vital capacity (FVC), Best measure                         | genus.Alistipes.id.968                    | -0.004125208 | 0.004178474 | 0.34300762  |
| 391 | YYHfMs | j7whIN | Forced vital capacity (FVC), Best measure                         | genus.Gordonibacter.id.821                | 0.000411936  | 0.00449536  | 0.928994646 |
| 392 | zaZf8A | j7whIN | Forced vital capacity (FVC), Best measure                         | genus.Oscillospira.id.2064                | 0.004164053  | 0.005958841 | 0.510840119 |
| 393 | ZJXDpG | j7whIN | Forced vital capacity (FVC), Best measure                         | class.Erysipelotrichia.id.2147            | 0.003459213  | 0.002811418 | 0.244204787 |
| 394 | zkWLyl | j7whIN | Forced vital capacity (FVC), Best measure                         | genus.Allisonella.id.2174                 | -0.00298679  | 0.005515361 | 0.607642045 |
| 395 | 0aMbT3 | QoRiKP | Forced expiratory volume in 1-second (FEV1), predicted percentage | genus.Eggerthella.id.819                  | -0.019705047 | 0.007773841 | 0.031983068 |
| 396 | 0heWA4 | QoRiKP | Forced expiratory volume in 1-second (FEV1), predicted percentage | genus.Lactococcus.id.1851                 | -0.024749338 | 0.008332768 | 0.020804142 |
| 397 | 0lsDJy | QoRiKP | Forced expiratory volume in 1-second (FEV1), predicted percentage | genus.DefluviitaleaceaeUCG011.id.11287    | 0.009494177  | 0.007877069 | 0.267249254 |
| 398 | 0ngO8p | QoRiKP | Forced expiratory volume in 1-second (FEV1), predicted percentage | genus.Flavonifractor.id.2059              | 0.011056123  | 0.020577572 | 0.628362404 |
| 399 | 0rTnk2 | QoRiKP | Forced expiratory volume in 1-second (FEV1), predicted percentage | genus.Lachnospira.id.2004                 | -0.020128604 | 0.016736593 | 0.29542426  |
| 400 | 0rWmph | QoRiKP | Forced expiratory volume in 1-second (FEV1), predicted percentage | phylum.Firmicutes.id.1672                 | -0.005133489 | 0.004229975 | 0.244979023 |
| 401 | 0Vfsi1 | QoRiKP | Forced expiratory volume in 1-second (FEV1), predicted percentage | genus.Hungatella.id.11306                 | -0.000897167 | 0.015725082 | 0.958090152 |
| 402 | 1rpkul | QoRiKP | Forced expiratory volume in 1-second (FEV1), predicted percentage | genus.FamilyXIIICUG001.id.11294           | -0.003910059 | 0.005566842 | 0.508758385 |
| 403 | 1uqUdL | QoRiKP | Forced expiratory volume in 1-second (FEV1), predicted percentage | genus.Escherichia.Shigella.id.3504        | -0.001393126 | 0.006237765 | 0.828870276 |
| 404 | 1zf0TZ | QoRiKP | Forced expiratory volume in 1-second (FEV1), predicted percentage | family.Streptococcaceae.id.1850           | 0.005908911  | 0.009026115 | 0.52746516  |
| 405 | 20HL0T | QoRiKP | Forced expiratory volume in 1-second (FEV1), predicted percentage | genus.Holdemanela.id.11393                | 0.008322106  | 0.004714688 | 0.111355794 |
| 406 | 2GJP3o | QoRiKP | Forced expiratory volume in 1-second (FEV1), predicted percentage | genus.Ruminococcus2.id.11374              | -0.008972845 | 0.003829931 | 0.03719455  |
| 407 | 2neTKK | QoRiKP | Forced expiratory volume in 1-second (FEV1), predicted percentage | phylum.Euryarchaeota.id.55                | 0.00239749   | 0.007271076 | 0.749148938 |
| 408 | 2vslhf | QoRiKP | Forced expiratory volume in 1-second (FEV1), predicted percentage | genus.Coproccoccus2.id.11302              | 0.022526112  | 0.014293103 | 0.166093725 |

|     | A      | B      | C                                                                 | D                                           | E            | F           | G           |
|-----|--------|--------|-------------------------------------------------------------------|---------------------------------------------|--------------|-------------|-------------|
| 409 | 31r1VV | QoRiKP | Forced expiratory volume in 1-second (FEV1), predicted percentage | family.Christensenellaceae.id.1866          | 0.001340042  | 0.003855633 | 0.736164536 |
| 410 | 37ZEpl | QoRiKP | Forced expiratory volume in 1-second (FEV1), predicted percentage | genus..Eubacteriumrectalegroup.id.14374     | 0.0064011    | 0.006346786 | 0.352114836 |
| 411 | 3cOJ1f | QoRiKP | Forced expiratory volume in 1-second (FEV1), predicted percentage | class.Actinobacteria.id.419                 | 0.000951872  | 0.006975435 | 0.89392259  |
| 412 | 3Oo7Td | QoRiKP | Forced expiratory volume in 1-second (FEV1), predicted percentage | class.Methanobacteria.id.119                | -0.012714216 | 0.013375982 | 0.378545804 |
| 413 | 3tgfXE | QoRiKP | Forced expiratory volume in 1-second (FEV1), predicted percentage | genus.Subdoligranulum.id.2070               | -0.001262157 | 0.006319561 | 0.846681004 |
| 414 | 4zBtt2 | QoRiKP | Forced expiratory volume in 1-second (FEV1), predicted percentage | genus.Bilophila.id.3170                     | 0.007153152  | 0.008533489 | 0.421477178 |
| 415 | 5IXuob | QoRiKP | Forced expiratory volume in 1-second (FEV1), predicted percentage | genus.RuminococcaceaeUCG014.id.11371        | 0.002224938  | 0.005574447 | 0.699101248 |
| 416 | 5qEcKL | QoRiKP | Forced expiratory volume in 1-second (FEV1), predicted percentage | genus.Streptococcus.id.1853                 | 0.008959698  | 0.007605728 | 0.261622755 |
| 417 | 5TN0Z7 | QoRiKP | Forced expiratory volume in 1-second (FEV1), predicted percentage | genus.Oscillibacter.id.2063                 | 0.007172714  | 0.005617729 | 0.233630248 |
| 418 | 5XtLwc | QoRiKP | Forced expiratory volume in 1-second (FEV1), predicted percentage | genus.Catenibacterium.id.2153               | -0.023804701 | 0.0267762   | 0.439479202 |
| 419 | 6gX3qe | QoRiKP | Forced expiratory volume in 1-second (FEV1), predicted percentage | phylum.Tenericutes.id.3919                  | -0.003938056 | 0.008013793 | 0.633743198 |
| 420 | 6jMcBB | QoRiKP | Forced expiratory volume in 1-second (FEV1), predicted percentage | family.Desulfovibrionaceae.id.3169          | -0.004761784 | 0.005735162 | 0.430459771 |
| 421 | 6mlWxZ | QoRiKP | Forced expiratory volume in 1-second (FEV1), predicted percentage | genus.Copro bacter.id.949                   | -0.009528152 | 0.007550041 | 0.238671171 |
| 422 | 77YJKV | QoRiKP | Forced expiratory volume in 1-second (FEV1), predicted percentage | genus..Eubacteriumruminantiumgroup.id.11340 | 0.003644353  | 0.004694148 | 0.448861324 |
| 423 | 7aTYpg | QoRiKP | Forced expiratory volume in 1-second (FEV1), predicted percentage | genus.Collinsella.id.815                    | 0.002984518  | 0.006578847 | 0.663807789 |
| 424 | 7dqlOH | QoRiKP | Forced expiratory volume in 1-second (FEV1), predicted percentage | genus..Clostridiuminnocuumgroup.id.14397    | 0.004935258  | 0.008792728 | 0.59210724  |
| 425 | 7ioeKt | QoRiKP | Forced expiratory volume in 1-second (FEV1), predicted percentage | phylum.Proteobacteria.id.2375               | -0.00968919  | 0.008921418 | 0.305683951 |
| 426 | 80h8vf | QoRiKP | Forced expiratory volume in 1-second (FEV1), predicted percentage | genus.Anaerostipes.id.1991                  | -0.000291988 | 0.007340787 | 0.969054544 |
| 427 | 8jKldu | QoRiKP | Forced expiratory volume in 1-second (FEV1), predicted percentage | genus.Coprococcus3.id.11303                 | -0.01004915  | 0.006635822 | 0.173701105 |
| 428 | 8NULRM | QoRiKP | Forced expiratory volume in 1-second (FEV1), predicted percentage | genus.Paraprevotella.id.962                 | -0.003497191 | 0.005100559 | 0.508517515 |
| 429 | 9i4tiU | QoRiKP | Forced expiratory volume in 1-second (FEV1), predicted percentage | order.Gastranaerophilales.id.1591           | -0.006742413 | 0.004970233 | 0.217044222 |
| 430 | 9s731W | QoRiKP | Forced expiratory volume in 1-second (FEV1), predicted percentage | genus.RuminococcaceaeUCG009.id.11366        | -0.006400933 | 0.007646854 | 0.422108143 |
| 431 | aclMuF | QoRiKP | Forced expiratory volume in 1-second (FEV1), predicted percentage | genus.Parasutterella.id.2892                | -0.00867214  | 0.008155325 | 0.308544506 |
| 432 | AdsBD9 | QoRiKP | Forced expiratory volume in 1-second (FEV1), predicted percentage | genus.Turicibacter.id.2162                  | 0.009283562  | 0.008108533 | 0.285340539 |
| 433 | aGfu8V | QoRiKP | Forced expiratory volume in 1-second (FEV1), predicted percentage | order.Bifidobacteriales.id.432              | -0.001871093 | 0.009208931 | 0.844065195 |
| 434 | AK0l7A | QoRiKP | Forced expiratory volume in 1-second (FEV1), predicted percentage | genus.LachnospiraceaeUCG010.id.11330        | -0.003165128 | 0.006350187 | 0.631593321 |
| 435 | aKuChq | QoRiKP | Forced expiratory volume in 1-second (FEV1), predicted percentage | genus.Faecalibacterium.id.2057              | 0.000837435  | 0.007449405 | 0.913649078 |
| 436 | aKXyAu | QoRiKP | Forced expiratory volume in 1-second (FEV1), predicted percentage | genus.Blautia.id.1992                       | -0.00335834  | 0.003971524 | 0.417547088 |
| 437 | AN8qjo | QoRiKP | Forced expiratory volume in 1-second (FEV1), predicted percentage | genus.Clostridiumsensustricto1.id.1873      | -0.008999244 | 0.005667794 | 0.173198821 |
| 438 | anDrA2 | QoRiKP | Forced expiratory volume in 1-second (FEV1), predicted percentage | genus..Eubacteriumventriosumgroup.id.11341  | -0.002292771 | 0.006698631 | 0.738064401 |
| 439 | ASQ2fp | QoRiKP | Forced expiratory volume in 1-second (FEV1), predicted percentage | genus.RuminococcaceaeNK4A214group.id.11358  | 0.001009014  | 0.0062199   | 0.874071347 |
| 440 | aToCrK | QoRiKP | Forced expiratory volume in 1-second (FEV1), predicted percentage | genus.Anaerotruncus.id.2054                 | 0.006212558  | 0.006480148 | 0.358304971 |
| 441 | axDRMS | QoRiKP | Forced expiratory volume in 1-second (FEV1), predicted percentage | family.Prevotellaceae.id.960                | 0.002685266  | 0.005030083 | 0.602460574 |
| 442 | AXpdwL | QoRiKP | Forced expiratory volume in 1-second (FEV1), predicted percentage | family.Verrucomicrobiaceae.id.4036          | 0.001898942  | 0.006471954 | 0.775861357 |
| 443 | B5jn0Y | QoRiKP | Forced expiratory volume in 1-second (FEV1), predicted percentage | genus.Roseburia.id.2012                     | -0.00391341  | 0.004794865 | 0.43172416  |
| 444 | BiKMtW | QoRiKP | Forced expiratory volume in 1-second (FEV1), predicted percentage | genus.Sutterella.id.2896                    | 0.006633847  | 0.009668158 | 0.508211899 |
| 445 | BLC7wV | QoRiKP | Forced expiratory volume in 1-second (FEV1), predicted percentage | genus.RuminococcaceaeUCG013.id.11370        | -0.006164776 | 0.005305068 | 0.272197169 |
| 446 | BLSFBU | QoRiKP | Forced expiratory volume in 1-second (FEV1), predicted percentage | family.Rikenellaceae.id.967                 | -0.00036337  | 0.006136345 | 0.95347056  |
| 447 | BPW89n | QoRiKP | Forced expiratory volume in 1-second (FEV1), predicted percentage | order.Verrucomicrobiales.id.4030            | 0.001910955  | 0.006473431 | 0.774538021 |
| 448 | Bt0kEx | QoRiKP | Forced expiratory volume in 1-second (FEV1), predicted percentage | genus.LachnospiraceaeNK4A136group.id.11319  | -0.000642659 | 0.002921082 | 0.829895277 |
| 449 | Bt1upE | QoRiKP | Forced expiratory volume in 1-second (FEV1), predicted percentage | family.Rhodospirillaceae.id.2717            | -0.017798635 | 0.010719313 | 0.122712725 |
| 450 | C1xV1V | QoRiKP | Forced expiratory volume in 1-second (FEV1), predicted percentage | order.Victivallales.id.2254                 | 0.011575626  | 0.008579438 | 0.225949909 |
| 451 | c62fwk | QoRiKP | Forced expiratory volume in 1-second (FEV1), predicted percentage | genus.Sellimonas.id.14369                   | 0.024612155  | 0.01547909  | 0.162931666 |
| 452 | cqFLTQ | QoRiKP | Forced expiratory volume in 1-second (FEV1), predicted percentage | genus.Coprococcus1.id.11301                 | -0.009027407 | 0.003734589 | 0.03623203  |
| 453 | CUtsMo | QoRiKP | Forced expiratory volume in 1-second (FEV1), predicted percentage | family.ClostridialesvadinBB60group.id.11286 | 0.002556223  | 0.005971358 | 0.676174849 |
| 454 | CYNr8c | QoRiKP | Forced expiratory volume in 1-second (FEV1), predicted percentage | order.Actinomycetales.id.420                | -0.011373032 | 0.005949948 | 0.15190903  |
| 455 | d9u3Wa | QoRiKP | Forced expiratory volume in 1-second (FEV1), predicted percentage | family.Lactobacillaceae.id.1836             | -0.003397435 | 0.006545708 | 0.622318802 |
| 456 | dP6VTT | QoRiKP | Forced expiratory volume in 1-second (FEV1), predicted percentage | class.Alphaproteobacteria.id.2379           | 0.016441067  | 0.010601431 | 0.181636824 |
| 457 | dSCeM7 | QoRiKP | Forced expiratory volume in 1-second (FEV1), predicted percentage | order.Enterobacteriales.id.3468             | 0.039407131  | 0.012306493 | 0.023937842 |
| 458 | DwGyne | QoRiKP | Forced expiratory volume in 1-second (FEV1), predicted percentage | family.BacteroidalesS24.7group.id.11173     | 0.011349862  | 0.008370788 | 0.223941259 |
| 459 | E1ZDX3 | QoRiKP | Forced expiratory volume in 1-second (FEV1), predicted percentage | genus.Oxalobacter.id.2978                   | 0.003541779  | 0.008510847 | 0.687049376 |

|     | A       | B      | C                                                                 | D                                             | E            | F           | G           |
|-----|---------|--------|-------------------------------------------------------------------|-----------------------------------------------|--------------|-------------|-------------|
| 460 | e5mJnF  | QoRiKP | Forced expiratory volume in 1-second (FEV1), predicted percentage | genus.Dorea.id.1997                           | -0.006493781 | 0.004781474 | 0.211487534 |
| 461 | ebP4zV  | QoRiKP | Forced expiratory volume in 1-second (FEV1), predicted percentage | genus.Ruminococcus1.id.11373                  | 0.003013753  | 0.006862252 | 0.672152842 |
| 462 | Fcq\$NY | QoRiKP | Forced expiratory volume in 1-second (FEV1), predicted percentage | family.Clostridiaceae1.id.1869                | -0.012936916 | 0.00480441  | 0.027381158 |
| 463 | fE3r8h  | QoRiKP | Forced expiratory volume in 1-second (FEV1), predicted percentage | phylum.Verrucomicrobia.id.3982                | 0.002752988  | 0.006672587 | 0.688619252 |
| 464 | FFi1Rd  | QoRiKP | Forced expiratory volume in 1-second (FEV1), predicted percentage | family.Actinomycetaceae.id.421                | -0.011365097 | 0.005950951 | 0.152156672 |
| 465 | FIVBaS  | QoRiKP | Forced expiratory volume in 1-second (FEV1), predicted percentage | order.Erysipelotrichales.id.2148              | 0.004469313  | 0.006075697 | 0.477363393 |
| 466 | Fr2Ff4  | QoRiKP | Forced expiratory volume in 1-second (FEV1), predicted percentage | class.Clostridia.id.1859                      | 0.003240006  | 0.009479573 | 0.73958412  |
| 467 | FRQYhm  | QoRiKP | Forced expiratory volume in 1-second (FEV1), predicted percentage | class.Gammaproteobacteria.id.3303             | -0.006561166 | 0.007064189 | 0.395624978 |
| 468 | FT7OrH  | QoRiKP | Forced expiratory volume in 1-second (FEV1), predicted percentage | genus.Actinomyces.id.423                      | -0.0101045   | 0.00556766  | 0.129262082 |
| 469 | FXBXNG  | QoRiKP | Forced expiratory volume in 1-second (FEV1), predicted percentage | family.FamilyXI.id.1936                       | 0.001955666  | 0.015066671 | 0.900966252 |
| 470 | gkAVOW  | QoRiKP | Forced expiratory volume in 1-second (FEV1), predicted percentage | phylum.Lentisphaerae.id.2238                  | 0.012499073  | 0.007997233 | 0.162043942 |
| 471 | GNp2YQ  | QoRiKP | Forced expiratory volume in 1-second (FEV1), predicted percentage | genus..Ruminococcusgauvreauigroup.id.11342    | -0.005773194 | 0.011428845 | 0.624404741 |
| 472 | hUp1f   | QoRiKP | Forced expiratory volume in 1-second (FEV1), predicted percentage | genus.RikenellaceaeRC9gutgroup.id.11191       | 0.003887088  | 0.009717822 | 0.698487067 |
| 473 | l2CEyx  | QoRiKP | Forced expiratory volume in 1-second (FEV1), predicted percentage | genus.Tyzzere1la3.id.11335                    | 0.016562555  | 0.018315505 | 0.387107527 |
| 474 | l5XXsr  | QoRiKP | Forced expiratory volume in 1-second (FEV1), predicted percentage | genus.Prevotella9.id.11183                    | 0.005270583  | 0.005108053 | 0.322505344 |
| 475 | iAhkfC  | QoRiKP | Forced expiratory volume in 1-second (FEV1), predicted percentage | genus.Erysipelatodoclostridium.id.11381       | 0.00519577   | 0.004866327 | 0.305083179 |
| 476 | IgBtIU  | QoRiKP | Forced expiratory volume in 1-second (FEV1), predicted percentage | class.Bacilli.id.1673                         | 0.001253541  | 0.003744936 | 0.742463984 |
| 477 | lI0qrp  | QoRiKP | Forced expiratory volume in 1-second (FEV1), predicted percentage | phylum.Actinobacteria.id.400                  | 0.004989063  | 0.007856378 | 0.537327197 |
| 478 | iMGTCd  | QoRiKP | Forced expiratory volume in 1-second (FEV1), predicted percentage | genus.Ruminiclostridium5.id.11355             | -0.003099822 | 0.007771941 | 0.700439783 |
| 479 | iwPbIH  | QoRiKP | Forced expiratory volume in 1-second (FEV1), predicted percentage | genus.Ruminiclostridium6.id.11356             | 0.00213846   | 0.005193124 | 0.68720439  |
| 480 | j0mByI  | QoRiKP | Forced expiratory volume in 1-second (FEV1), predicted percentage | order.NB1n.id.3953                            | 0.000819203  | 0.007727702 | 0.917484049 |
| 481 | j4g0ZV  | QoRiKP | Forced expiratory volume in 1-second (FEV1), predicted percentage | genus.CandidatusSoleaferrea.id.11350          | 0.009461453  | 0.016998882 | 0.595143592 |
| 482 | j87dXS  | QoRiKP | Forced expiratory volume in 1-second (FEV1), predicted percentage | genus.Eisenbergiella.id.11304                 | -0.004362275 | 0.013584658 | 0.755452709 |
| 483 | jfZByg  | QoRiKP | Forced expiratory volume in 1-second (FEV1), predicted percentage | order.Lactobacillales.id.1800                 | 0.000182507  | 0.003836258 | 0.962838106 |
| 484 | JHChB7  | QoRiKP | Forced expiratory volume in 1-second (FEV1), predicted percentage | genus.Adlercreutzia.id.812                    | 0.007097112  | 0.012014358 | 0.576267459 |
| 485 | jHia6Z  | QoRiKP | Forced expiratory volume in 1-second (FEV1), predicted percentage | order.Pasteurellales.id.3688                  | -0.00925326  | 0.003713072 | 0.028324032 |
| 486 | jJC3Fm  | QoRiKP | Forced expiratory volume in 1-second (FEV1), predicted percentage | genus.Enterorhabdus.id.820                    | 0.00705555   | 0.007846893 | 0.419406713 |
| 487 | jUcEpg  | QoRiKP | Forced expiratory volume in 1-second (FEV1), predicted percentage | genus.Butyricimonas.id.945                    | -0.012944988 | 0.005416555 | 0.037965541 |
| 488 | kjA5PB  | QoRiKP | Forced expiratory volume in 1-second (FEV1), predicted percentage | genus.RuminococcaceaeUCG010.id.11367          | 0.004754614  | 0.006031138 | 0.47458922  |
| 489 | kodRd1  | QoRiKP | Forced expiratory volume in 1-second (FEV1), predicted percentage | family.Defluviitaleaceae.id.1924              | 0.00609228   | 0.005651331 | 0.309066562 |
| 490 | LCZ8yH  | QoRiKP | Forced expiratory volume in 1-second (FEV1), predicted percentage | genus.Prevotella7.id.11182                    | -0.007033356 | 0.014096174 | 0.629778669 |
| 491 | lUcl8y  | QoRiKP | Forced expiratory volume in 1-second (FEV1), predicted percentage | genus.RuminococcaceaeUCG003.id.11361          | -0.004394758 | 0.007282601 | 0.559641031 |
| 492 | LKYg6S  | QoRiKP | Forced expiratory volume in 1-second (FEV1), predicted percentage | genus.Terrisporobacter.id.11348               | 4.42893E-05  | 0.006264533 | 0.99480298  |
| 493 | LRKdla  | QoRiKP | Forced expiratory volume in 1-second (FEV1), predicted percentage | family.Bifidobacteriaceae.id.433              | -0.001871093 | 0.009208931 | 0.844065195 |
| 494 | m0ByAU  | QoRiKP | Forced expiratory volume in 1-second (FEV1), predicted percentage | order.Desulfovibrionales.id.3156              | -0.005847293 | 0.004987878 | 0.268246953 |
| 495 | m9LXEq  | QoRiKP | Forced expiratory volume in 1-second (FEV1), predicted percentage | family.Enterobacteriaceae.id.3469             | 0.039407131  | 0.012306493 | 0.023937842 |
| 496 | MBOR7Y  | QoRiKP | Forced expiratory volume in 1-second (FEV1), predicted percentage | family.Coriobacteriaceae.id.811               | 0.003181177  | 0.007981537 | 0.69721312  |
| 497 | MpL626  | QoRiKP | Forced expiratory volume in 1-second (FEV1), predicted percentage | genus.Lachnoclostridium.id.11308              | -0.012284845 | 0.006555058 | 0.087705301 |
| 498 | Msb4zz  | QoRiKP | Forced expiratory volume in 1-second (FEV1), predicted percentage | class.Melainabacteria.id.1589                 | -0.0011129   | 0.004615452 | 0.815523325 |
| 499 | MXS84H  | QoRiKP | Forced expiratory volume in 1-second (FEV1), predicted percentage | class.Negativicutes.id.2164                   | 0.000468007  | 0.005724572 | 0.936631505 |
| 500 | mz9jd0  | QoRiKP | Forced expiratory volume in 1-second (FEV1), predicted percentage | genus.Barnesiella.id.944                      | 0.006602242  | 0.007499575 | 0.395959415 |
| 501 | n3j0op  | QoRiKP | Forced expiratory volume in 1-second (FEV1), predicted percentage | class.Deltaproteobacteria.id.3087             | -0.002868977 | 0.005321573 | 0.600544008 |
| 502 | nFlAU5  | QoRiKP | Forced expiratory volume in 1-second (FEV1), predicted percentage | family.Lachnospiraceae.id.1987                | -0.001020925 | 0.003109808 | 0.747229026 |
| 503 | nlesEv  | QoRiKP | Forced expiratory volume in 1-second (FEV1), predicted percentage | genus.Peptococcus.id.2037                     | 0.014431446  | 0.008128016 | 0.106197017 |
| 504 | NKNDGp  | QoRiKP | Forced expiratory volume in 1-second (FEV1), predicted percentage | order.Methanobacteriales.id.120               | -0.012714216 | 0.013375982 | 0.378545804 |
| 505 | nnD7ru  | QoRiKP | Forced expiratory volume in 1-second (FEV1), predicted percentage | genus..Eubacteriumoxidoreducensgroup.id.11339 | 0.007474599  | 0.007105516 | 0.3700767   |
| 506 | NqdTjG  | QoRiKP | Forced expiratory volume in 1-second (FEV1), predicted percentage | genus.FamilyXIIID3011group.id.11293           | 0.011705633  | 0.009281523 | 0.238954486 |
| 507 | nQH0yD  | QoRiKP | Forced expiratory volume in 1-second (FEV1), predicted percentage | class.Lentisphaeria.id.2250                   | 0.011575626  | 0.008579438 | 0.225949909 |
| 508 | nRNBx9  | QoRiKP | Forced expiratory volume in 1-second (FEV1), predicted percentage | class.Mollicutes.id.3920                      | -0.003938056 | 0.008013793 | 0.633743198 |
| 509 | O0n2Pz  | QoRiKP | Forced expiratory volume in 1-second (FEV1), predicted percentage | family.Bacteroidaceae.id.917                  | -0.006723635 | 0.009222227 | 0.489628702 |
| 510 | obtxsV  | QoRiKP | Forced expiratory volume in 1-second (FEV1), predicted percentage | family.Veillonellaceae.id.2172                | 0.003481232  | 0.002982336 | 0.259208412 |

|     | A      | B      | C                                                                 | D                                                 | E            | F           | G           |
|-----|--------|--------|-------------------------------------------------------------------|---------------------------------------------------|--------------|-------------|-------------|
| 511 | oChqj7 | QoRiKP | Forced expiratory volume in 1-second (FEV1), predicted percentage | phylum.Bacteroidetes.id.905                       | 0.002268378  | 0.006022422 | 0.71758728  |
| 512 | oGD8An | QoRiKP | Forced expiratory volume in 1-second (FEV1), predicted percentage | order.Coriobacteriales.id.810                     | 0.003181177  | 0.007981537 | 0.69721312  |
| 513 | OhSZ6N | QoRiKP | Forced expiratory volume in 1-second (FEV1), predicted percentage | genus.RuminococcaceaeUCG002.id.11360              | -0.002323148 | 0.003456635 | 0.510065895 |
| 514 | oIdISu | QoRiKP | Forced expiratory volume in 1-second (FEV1), predicted percentage | genus..Eubacteriumnodatumgroup.id.11297           | -0.003798059 | 0.007614395 | 0.629883664 |
| 515 | OtCSo3 | QoRiKP | Forced expiratory volume in 1-second (FEV1), predicted percentage | genus.Alloprevotella.id.961                       | -0.018554191 | 0.018620298 | 0.375427897 |
| 516 | oU56W6 | QoRiKP | Forced expiratory volume in 1-second (FEV1), predicted percentage | family.Peptostreptococcaceae.id.2042              | -0.001330189 | 0.003196282 | 0.685291378 |
| 517 | Oxkiqb | QoRiKP | Forced expiratory volume in 1-second (FEV1), predicted percentage | order.Clostridiales.id.1863                       | 0.0044532    | 0.008939167 | 0.628176037 |
| 518 | P9709V | QoRiKP | Forced expiratory volume in 1-second (FEV1), predicted percentage | genus..Eubacteriumhalliigroup.id.11338            | -0.003888819 | 0.003232524 | 0.248915654 |
| 519 | PcT6eJ | QoRiKP | Forced expiratory volume in 1-second (FEV1), predicted percentage | phylum.Cyanobacteria.id.1500                      | -0.005803667 | 0.007307629 | 0.45733569  |
| 520 | pCXx5P | QoRiKP | Forced expiratory volume in 1-second (FEV1), predicted percentage | genus.Phascolarctobacterium.id.2168               | -0.00314874  | 0.008251147 | 0.712685139 |
| 521 | PGIGHi | QoRiKP | Forced expiratory volume in 1-second (FEV1), predicted percentage | genus.LachnospiraceaeUCG008.id.11328              | 0.000692492  | 0.007919069 | 0.932466134 |
| 522 | pXAgfu | QoRiKP | Forced expiratory volume in 1-second (FEV1), predicted percentage | family.Acidaminococcaceae.id.2166                 | -0.010960198 | 0.009976561 | 0.322008085 |
| 523 | q1b0SE | QoRiKP | Forced expiratory volume in 1-second (FEV1), predicted percentage | genus.Lactobacillus.id.1837                       | -0.004545282 | 0.00679954  | 0.533450088 |
| 524 | Q3dvBY | QoRiKP | Forced expiratory volume in 1-second (FEV1), predicted percentage | genus.Methanobrevibacter.id.123                   | -0.014990778 | 0.010177914 | 0.237197084 |
| 525 | Q46NVk | QoRiKP | Forced expiratory volume in 1-second (FEV1), predicted percentage | genus.Intestinibacter.id.11345                    | 0.000594679  | 0.004616687 | 0.89964114  |
| 526 | qE3Gq8 | QoRiKP | Forced expiratory volume in 1-second (FEV1), predicted percentage | genus..Ruminococcustorquesgroup.id.14377          | 0.000566162  | 0.004446379 | 0.902259003 |
| 527 | qENAoR | QoRiKP | Forced expiratory volume in 1-second (FEV1), predicted percentage | genus.Victivallis.id.2256                         | 0.001971087  | 0.012074478 | 0.874374729 |
| 528 | QGrGNV | QoRiKP | Forced expiratory volume in 1-second (FEV1), predicted percentage | genus.Haemophilus.id.3698                         | -0.009275094 | 0.004543494 | 0.080546148 |
| 529 | qiWbrh | QoRiKP | Forced expiratory volume in 1-second (FEV1), predicted percentage | order.Selenomonadales.id.2165                     | 0.000468007  | 0.005724572 | 0.936631505 |
| 530 | QjakFr | QoRiKP | Forced expiratory volume in 1-second (FEV1), predicted percentage | genus.LachnospiraceaeFCS020group.id.11314         | 0.000382364  | 0.003563375 | 0.91667023  |
| 531 | Qyd7XB | QoRiKP | Forced expiratory volume in 1-second (FEV1), predicted percentage | genus..Eubacteriumxylanophilumgroup.id.14375      | 0.006668151  | 0.009272037 | 0.495338992 |
| 532 | R6RQXL | QoRiKP | Forced expiratory volume in 1-second (FEV1), predicted percentage | genus..Ruminococcusgnavusgroup.id.14376           | 0.007726504  | 0.008048066 | 0.362112999 |
| 533 | R7oLoV | QoRiKP | Forced expiratory volume in 1-second (FEV1), predicted percentage | genus.RuminococcaceaeUCG011.id.11368              | -0.011294624 | 0.008946372 | 0.262455077 |
| 534 | RKITkD | QoRiKP | Forced expiratory volume in 1-second (FEV1), predicted percentage | genus.Bifidobacterium.id.436                      | 0.005130828  | 0.007189811 | 0.493548162 |
| 535 | rlb7o5 | QoRiKP | Forced expiratory volume in 1-second (FEV1), predicted percentage | genus..Eubacteriumcoprostanoligenesgroup.id.11375 | -0.004628964 | 0.00796535  | 0.572862557 |
| 536 | RmoHnu | QoRiKP | Forced expiratory volume in 1-second (FEV1), predicted percentage | genus.Ruminiclostridium9.id.11357                 | -0.002483726 | 0.007683499 | 0.755944968 |
| 537 | rsbOlb | QoRiKP | Forced expiratory volume in 1-second (FEV1), predicted percentage | order.MollicutesRF9.id.11579                      | 0.003240991  | 0.006067405 | 0.603855568 |
| 538 | Rv99Lm | QoRiKP | Forced expiratory volume in 1-second (FEV1), predicted percentage | genus..Eubacteriumbrachygroup.id.11296            | 5.25435E-05  | 0.006403182 | 0.993653701 |
| 539 | sF7W2L | QoRiKP | Forced expiratory volume in 1-second (FEV1), predicted percentage | genus.Howardella.id.2000                          | -0.001248185 | 0.010911478 | 0.911745964 |
| 540 | sFxDb3 | QoRiKP | Forced expiratory volume in 1-second (FEV1), predicted percentage | order.Burkholderiales.id.2874                     | -0.001354341 | 0.00802355  | 0.87014706  |
| 541 | Sgv0J4 | QoRiKP | Forced expiratory volume in 1-second (FEV1), predicted percentage | family.Victivallaceae.id.2255                     | 0.00853294   | 0.008847164 | 0.357547776 |
| 542 | SpO9Ka | QoRiKP | Forced expiratory volume in 1-second (FEV1), predicted percentage | family.Porphyromonadaceae.id.943                  | -0.008697967 | 0.00698371  | 0.253031746 |
| 543 | staWrf | QoRiKP | Forced expiratory volume in 1-second (FEV1), predicted percentage | order.Rhodospirillales.id.2667                    | -0.007281538 | 0.00797861  | 0.381002999 |
| 544 | szt6bn | QoRiKP | Forced expiratory volume in 1-second (FEV1), predicted percentage | class.Coriobacteriia.id.809                       | 0.003181177  | 0.007981537 | 0.69721312  |
| 545 | T35lgz | QoRiKP | Forced expiratory volume in 1-second (FEV1), predicted percentage | family.Oxalobacteraceae.id.2966                   | -0.002217673 | 0.007171028 | 0.762431761 |
| 546 | T8TGlu | QoRiKP | Forced expiratory volume in 1-second (FEV1), predicted percentage | family.Peptococcaceae.id.2024                     | 0.017064288  | 0.005007392 | 0.011321353 |
| 547 | tbXTaX | QoRiKP | Forced expiratory volume in 1-second (FEV1), predicted percentage | genus.ChristensenellaceaeR.7group.id.11283        | -0.003546294 | 0.009789465 | 0.726543536 |
| 548 | TGrzdF | QoRiKP | Forced expiratory volume in 1-second (FEV1), predicted percentage | genus..Eubacteriumfissicatenaingroup.id.14373     | -0.012828954 | 0.011890025 | 0.322055349 |
| 549 | tkl5vG | QoRiKP | Forced expiratory volume in 1-second (FEV1), predicted percentage | genus.Slackia.id.825                              | -0.000597127 | 0.012140739 | 0.963130746 |
| 550 | TIODZI | QoRiKP | Forced expiratory volume in 1-second (FEV1), predicted percentage | genus.RuminococcaceaeUCG004.id.11362              | -0.011775937 | 0.012816639 | 0.388762396 |
| 551 | TQSpIB | QoRiKP | Forced expiratory volume in 1-second (FEV1), predicted percentage | genus.LachnospiraceaeUCG004.id.11324              | 0.003552466  | 0.009610854 | 0.720205329 |
| 552 | tSiIO9 | QoRiKP | Forced expiratory volume in 1-second (FEV1), predicted percentage | order.Bacteroidales.id.913                        | 0.001461426  | 0.005724783 | 0.804244592 |
| 553 | TUj4LC | QoRiKP | Forced expiratory volume in 1-second (FEV1), predicted percentage | genus.LachnospiraceaeNC2004group.id.11316         | 0.013211917  | 0.007668072 | 0.128558336 |
| 554 | uCOF7P | QoRiKP | Forced expiratory volume in 1-second (FEV1), predicted percentage | order.Bacillales.id.1674                          | 0.006972489  | 0.012130706 | 0.586329839 |
| 555 | uHEy8Q | QoRiKP | Forced expiratory volume in 1-second (FEV1), predicted percentage | genus.Akkermansia.id.4037                         | 0.001850058  | 0.006464662 | 0.781218249 |
| 556 | uQYGEB | QoRiKP | Forced expiratory volume in 1-second (FEV1), predicted percentage | genus.Parabacteroides.id.954                      | -0.003141299 | 0.008888209 | 0.741611479 |
| 557 | UsMxlz | QoRiKP | Forced expiratory volume in 1-second (FEV1), predicted percentage | class.Verrucomicrobiae.id.4029                    | 0.001910955  | 0.006473431 | 0.774538021 |
| 558 | UTPK2n | QoRiKP | Forced expiratory volume in 1-second (FEV1), predicted percentage | class.Bacteroidia.id.912                          | 0.001461426  | 0.005724783 | 0.804244592 |
| 559 | UYJxH8 | QoRiKP | Forced expiratory volume in 1-second (FEV1), predicted percentage | genus.Butyrivibrio.id.1993                        | -0.009859014 | 0.0068232   | 0.172149283 |
| 560 | Vd8Fsi | QoRiKP | Forced expiratory volume in 1-second (FEV1), predicted percentage | genus.Bacteroides.id.918                          | -0.006723635 | 0.009222227 | 0.489628702 |
| 561 | vlyGOP | QoRiKP | Forced expiratory volume in 1-second (FEV1), predicted percentage | family.Ruminococcaceae.id.2050                    | 0.000620849  | 0.005679192 | 0.915641181 |

|     | A      | B      | C                                                                 | D                                         | E            | F           | G           |
|-----|--------|--------|-------------------------------------------------------------------|-------------------------------------------|--------------|-------------|-------------|
| 562 | W49IoY | QoRiKP | Forced expiratory volume in 1-second (FEV1), predicted percentage | genus.Olsenella.id.822                    | 0.007898127  | 0.005692115 | 0.198663376 |
| 563 | w5yhuV | QoRiKP | Forced expiratory volume in 1-second (FEV1), predicted percentage | genus.Romboutsia.id.11347                 | 0.006785625  | 0.004177785 | 0.132612649 |
| 564 | WaNFee | QoRiKP | Forced expiratory volume in 1-second (FEV1), predicted percentage | genus.Desulfovibrio.id.3173               | -0.001156435 | 0.007265894 | 0.877488081 |
| 565 | WCt5pC | QoRiKP | Forced expiratory volume in 1-second (FEV1), predicted percentage | genus.Anaerofilum.id.2053                 | 0.011237946  | 0.007498544 | 0.168185675 |
| 566 | WEMGli | QoRiKP | Forced expiratory volume in 1-second (FEV1), predicted percentage | family.Alcaligenaceae.id.2875             | -0.00634543  | 0.01043556  | 0.560010958 |
| 567 | wFbL6J | QoRiKP | Forced expiratory volume in 1-second (FEV1), predicted percentage | genus.Marvinbryantia.id.2005              | 0.004103826  | 0.010509258 | 0.706362047 |
| 568 | wIF1Yn | QoRiKP | Forced expiratory volume in 1-second (FEV1), predicted percentage | genus.LachnospiraceaeUCG001.id.11321      | -0.004364386 | 0.006781878 | 0.533062942 |
| 569 | wJFco0 | QoRiKP | Forced expiratory volume in 1-second (FEV1), predicted percentage | genus.Veillonella.id.2198                 | 0.000284769  | 0.009769583 | 0.977691476 |
| 570 | wn5rK2 | QoRiKP | Forced expiratory volume in 1-second (FEV1), predicted percentage | genus.ErysipelotrichaceaeUCG003.id.11384  | -0.002428161 | 0.004342704 | 0.584903152 |
| 571 | wQYhwp | QoRiKP | Forced expiratory volume in 1-second (FEV1), predicted percentage | genus.Odoribacter.id.952                  | 0.01142245   | 0.010923944 | 0.343622643 |
| 572 | WvdQyb | QoRiKP | Forced expiratory volume in 1-second (FEV1), predicted percentage | genus..Eubacteriumeligensgroup.id.14372   | 0.001725353  | 0.008933463 | 0.854454484 |
| 573 | X4kHrP | QoRiKP | Forced expiratory volume in 1-second (FEV1), predicted percentage | class.Betaproteobacteria.id.2867          | -0.003855654 | 0.007108669 | 0.599429552 |
| 574 | xCuklr | QoRiKP | Forced expiratory volume in 1-second (FEV1), predicted percentage | genus.Dialister.id.2183                   | -0.001654194 | 0.008598664 | 0.852239821 |
| 575 | Xtktja | QoRiKP | Forced expiratory volume in 1-second (FEV1), predicted percentage | family.Pasteurellaceae.id.3689            | -0.00925326  | 0.003713072 | 0.028324032 |
| 576 | XTu0EY | QoRiKP | Forced expiratory volume in 1-second (FEV1), predicted percentage | genus.Intestinimonas.id.2062              | -0.001159895 | 0.003906849 | 0.770911467 |
| 577 | XVFzMF | QoRiKP | Forced expiratory volume in 1-second (FEV1), predicted percentage | genus.Holdemania.id.2157                  | 0.002418381  | 0.006003712 | 0.694168745 |
| 578 | y0FJ9U | QoRiKP | Forced expiratory volume in 1-second (FEV1), predicted percentage | genus.LachnospiraceaeND3007group.id.11317 | -0.066132198 | 0.044890858 | 0.37965391  |
| 579 | Y7cF3n | QoRiKP | Forced expiratory volume in 1-second (FEV1), predicted percentage | family.Methanobacteriaceae.id.121         | -0.012714216 | 0.013375982 | 0.378545804 |
| 580 | yakWtY | QoRiKP | Forced expiratory volume in 1-second (FEV1), predicted percentage | genus.Butyricoccus.id.2055                | -0.006422006 | 0.004682076 | 0.219262586 |
| 581 | yerlNC | QoRiKP | Forced expiratory volume in 1-second (FEV1), predicted percentage | genus.RuminococcaceaeUCG005.id.11363      | -0.004450647 | 0.006745727 | 0.521861436 |
| 582 | yfdJv6 | QoRiKP | Forced expiratory volume in 1-second (FEV1), predicted percentage | family.Erysipelotrichaceae.id.2149        | 0.004469313  | 0.006075697 | 0.477363393 |
| 583 | ygbSF7 | QoRiKP | Forced expiratory volume in 1-second (FEV1), predicted percentage | genus.Fusicatenibacter.id.11305           | 0.004293015  | 0.006421285 | 0.51330681  |
| 584 | ylev3A | QoRiKP | Forced expiratory volume in 1-second (FEV1), predicted percentage | family.FamilyXIII.id.1957                 | -0.001970079 | 0.007276937 | 0.793453145 |
| 585 | yLt27i | QoRiKP | Forced expiratory volume in 1-second (FEV1), predicted percentage | genus.Senegalimassilia.id.11160           | -0.003509385 | 0.007399244 | 0.66767812  |
| 586 | YXZeGZ | QoRiKP | Forced expiratory volume in 1-second (FEV1), predicted percentage | genus.Alistipes.id.968                    | -0.003284882 | 0.009926304 | 0.746406513 |
| 587 | YYHfMs | QoRiKP | Forced expiratory volume in 1-second (FEV1), predicted percentage | genus.Gordonibacter.id.821                | -0.005772728 | 0.007299641 | 0.449383475 |
| 588 | zaZf8A | QoRiKP | Forced expiratory volume in 1-second (FEV1), predicted percentage | genus.Oscillospira.id.2064                | -0.001573519 | 0.00870004  | 0.862429439 |
| 589 | ZJXDpG | QoRiKP | Forced expiratory volume in 1-second (FEV1), predicted percentage | class.Erysipelotrichia.id.2147            | 0.004469313  | 0.006075697 | 0.477363393 |
| 590 | zkWLyl | QoRiKP | Forced expiratory volume in 1-second (FEV1), predicted percentage | genus.Allisonella.id.2174                 | -0.006152185 | 0.013222063 | 0.658127646 |
| 591 | 0aMbT3 | 1SSbcA | COPD                                                              | genus.Eggerthella.id.819                  | -0.02461802  | 0.027807164 | 0.40537133  |
| 592 | 0heWA4 | 1SSbcA | COPD                                                              | genus.Lactococcus.id.1851                 | 0.019062117  | 0.035579441 | 0.611391121 |
| 593 | 0IsDJy | 1SSbcA | COPD                                                              | genus.DefluviitaleaceaeUCG011.id.11287    | 0.006229857  | 0.027241527 | 0.825647499 |
| 594 | 0ngO8p | 1SSbcA | COPD                                                              | genus.Flavonifractor.id.2059              | 0.008454711  | 0.026503153 | 0.77064215  |
| 595 | 0rTnk2 | 1SSbcA | COPD                                                              | genus.Lachnospira.id.2004                 | 0.071816055  | 0.039211526 | 0.140981294 |
| 596 | 0rWmph | 1SSbcA | COPD                                                              | phylum.Firmicutes.id.1672                 | -0.009058373 | 0.01789924  | 0.62197175  |
| 597 | 0Vfsi1 | 1SSbcA | COPD                                                              | genus.Hungatella.id.11306                 | -0.01943973  | 0.055636386 | 0.749871929 |
| 598 | 1rpkul | 1SSbcA | COPD                                                              | genus.FamilyXIIICUG001.id.11294           | -0.043284095 | 0.021133933 | 0.086470949 |
| 599 | 1uqUdL | 1SSbcA | COPD                                                              | genus.Escherichia.Shigella.id.3504        | 0.008277778  | 0.020686524 | 0.699516139 |
| 600 | 1zf0TZ | 1SSbcA | COPD                                                              | family.Streptococcaceae.id.1850           | -0.011931796 | 0.029292806 | 0.694448272 |
| 601 | 20HL0T | 1SSbcA | COPD                                                              | genus.Holdemanella.id.11393               | -0.006331278 | 0.013221869 | 0.643465533 |
| 602 | 2GJP3o | 1SSbcA | COPD                                                              | genus.Ruminococcus2.id.11374              | -0.005287036 | 0.009619256 | 0.59189032  |
| 603 | 2neTKK | 1SSbcA | COPD                                                              | phylum.Euryarchaeota.id.55                | -0.018976971 | 0.037012882 | 0.62200541  |
| 604 | 2vslhf | 1SSbcA | COPD                                                              | genus.Coprococcus2.id.11302               | -0.033972641 | 0.039230401 | 0.419777408 |
| 605 | 31r1VV | 1SSbcA | COPD                                                              | family.Christensenellaceae.id.1866        | -0.007752175 | 0.008976915 | 0.410248428 |
| 606 | 37ZEpl | 1SSbcA | COPD                                                              | genus..Eubacteriumrectalegroup.id.14374   | -0.011638862 | 0.020064714 | 0.582981294 |
| 607 | 3cOJ1f | 1SSbcA | COPD                                                              | class.Actinobacteria.id.419               | -0.014169052 | 0.014583886 | 0.352151132 |
| 608 | 3Oo7Td | 1SSbcA | COPD                                                              | class.Methanobacteria.id.119              | 0.068919197  | 0.032336345 | 0.077068389 |
| 609 | 3tgfXE | 1SSbcA | COPD                                                              | genus.Subdoligranulum.id.2070             | 0.012597467  | 0.012129858 | 0.326109858 |
| 610 | 4zBtt2 | 1SSbcA | COPD                                                              | genus.Bilophila.id.3170                   | 0.011966647  | 0.029341437 | 0.691215708 |
| 611 | 5IXuob | 1SSbcA | COPD                                                              | genus.RuminococcaceaeUCG014.id.11371      | 0.032426022  | 0.011688487 | 0.024140244 |
| 612 | 5qEcKL | 1SSbcA | COPD                                                              | genus.Streptococcus.id.1853               | 0.002852073  | 0.02189818  | 0.898957289 |

|     | A       | B      | C    | D                                           | E            | F           | G           |
|-----|---------|--------|------|---------------------------------------------|--------------|-------------|-------------|
| 613 | 5TN0Z7  | 1SSbcA | COPD | genus.Oscillibacter.id.2063                 | 0.037306751  | 0.023897772 | 0.152934204 |
| 614 | 5XtLwc  | 1SSbcA | COPD | genus.Catenibacterium.id.2153               | -0.039281856 | 0.084540472 | 0.687858041 |
| 615 | 6gX3qe  | 1SSbcA | COPD | phylum.Tenericutes.id.3919                  | -0.006458742 | 0.016856855 | 0.70962584  |
| 616 | 6jMcBB  | 1SSbcA | COPD | family.Desulfovibrionaceae.id.3169          | -0.055741555 | 0.020348743 | 0.028946906 |
| 617 | 6mIWxZ  | 1SSbcA | COPD | genus.Coprobacter.id.949                    | 0.009076739  | 0.018322248 | 0.63219612  |
| 618 | 77YJKV  | 1SSbcA | COPD | genus..Eubacteriumruminantiumgroup.id.11340 | -0.004862186 | 0.016789113 | 0.775838784 |
| 619 | 7aTYpg  | 1SSbcA | COPD | genus.Collinsella.id.815                    | -0.010938695 | 0.020150348 | 0.604076738 |
| 620 | 7dqlOH  | 1SSbcA | COPD | genus..Clostridiuminnocuumgroup.id.14397    | -0.002460783 | 0.031925628 | 0.941067044 |
| 621 | 7ioeKt  | 1SSbcA | COPD | phylum.Proteobacteria.id.2375               | -0.008362998 | 0.0170997   | 0.635339098 |
| 622 | 80h8vf  | 1SSbcA | COPD | genus.Anaerostipes.id.1991                  | 0.037213197  | 0.018064907 | 0.063868497 |
| 623 | 8jKldu  | 1SSbcA | COPD | genus.Coprococcus3.id.11303                 | -0.003042114 | 0.02861159  | 0.918790681 |
| 624 | 8NULRM  | 1SSbcA | COPD | genus.Paraprevotella.id.962                 | -0.009418542 | 0.016337677 | 0.577027477 |
| 625 | 9i4tiU  | 1SSbcA | COPD | order.Gastranaerophilales.id.1591           | 0.003360425  | 0.0156187   | 0.835781497 |
| 626 | 9s731W  | 1SSbcA | COPD | genus.RuminococcaceaeUCG009.id.11366        | 0.032663127  | 0.023650263 | 0.200574957 |
| 627 | acLMuF  | 1SSbcA | COPD | genus.Parasutterella.id.2892                | 0.022237178  | 0.024744339 | 0.388072985 |
| 628 | AdsBD9  | 1SSbcA | COPD | genus.Turicibacter.id.2162                  | -0.002970063 | 0.025536827 | 0.910677142 |
| 629 | aGfu8V  | 1SSbcA | COPD | order.Bifidobacteriales.id.432              | -0.010975832 | 0.020852613 | 0.612919404 |
| 630 | AK0l7A  | 1SSbcA | COPD | genus.LachnospiraceaeUCG010.id.11330        | 0.025083968  | 0.01558652  | 0.146208902 |
| 631 | aKuChq  | 1SSbcA | COPD | genus.Faecalibacterium.id.2057              | 0.002990642  | 0.014722454 | 0.84480827  |
| 632 | aKXyAu  | 1SSbcA | COPD | genus.Blautia.id.1992                       | 0.019904604  | 0.012435697 | 0.140548033 |
| 633 | AN8qjo  | 1SSbcA | COPD | genus.Clostridiumsensustricto1.id.1873      | -0.026387555 | 0.026246978 | 0.371607684 |
| 634 | anDrA2  | 1SSbcA | COPD | genus..Eubacteriumventriosumgroup.id.11341  | -0.040643486 | 0.021389328 | 0.079816607 |
| 635 | ASQ2fp  | 1SSbcA | COPD | genus.RuminococcaceaeNK4A214group.id.11358  | -0.016051732 | 0.014388582 | 0.288376719 |
| 636 | aToCrK  | 1SSbcA | COPD | genus.Anaerotruncus.id.2054                 | -0.01787314  | 0.021094556 | 0.414889925 |
| 637 | axDRMS  | 1SSbcA | COPD | family.Prevotellaceae.id.960                | -0.010429585 | 0.013329005 | 0.446970383 |
| 638 | AXpdwL  | 1SSbcA | COPD | family.Verrucomicrobiaceae.id.4036          | -0.014351991 | 0.020478037 | 0.501114337 |
| 639 | B5jn0Y  | 1SSbcA | COPD | genus.Roseburia.id.2012                     | 0.000103303  | 0.013910464 | 0.994196799 |
| 640 | BiKMtW  | 1SSbcA | COPD | genus.Sutterella.id.2896                    | -0.015110508 | 0.016996673 | 0.394870983 |
| 641 | BLC7wV  | 1SSbcA | COPD | genus.RuminococcaceaeUCG013.id.11370        | 0.002890522  | 0.014358379 | 0.844930464 |
| 642 | BLSFBU  | 1SSbcA | COPD | family.Rikenellaceae.id.967                 | -0.014452316 | 0.016380709 | 0.392524262 |
| 643 | BPW89n  | 1SSbcA | COPD | order.Verrucomicrobiales.id.4030            | -0.014427529 | 0.020478013 | 0.498922069 |
| 644 | Bt0kEx  | 1SSbcA | COPD | genus.LachnospiraceaeNK4A136group.id.11319  | -0.00996798  | 0.007812046 | 0.226108827 |
| 645 | Bt1upE  | 1SSbcA | COPD | family.Rhodospirillaceae.id.2717            | 0.011602807  | 0.017480589 | 0.51939708  |
| 646 | C1xv1V  | 1SSbcA | COPD | order.Victivallales.id.2254                 | 0.004758798  | 0.024348334 | 0.851494165 |
| 647 | c62fwk  | 1SSbcA | COPD | genus.Sellimonas.id.14369                   | 0.029856439  | 0.027276629 | 0.309928341 |
| 648 | cqFLTQ  | 1SSbcA | COPD | genus.Coprococcus1.id.11301                 | -0.005873221 | 0.01587086  | 0.719052647 |
| 649 | CutsMo  | 1SSbcA | COPD | family.ClostridialesvadinBB60group.id.11286 | -0.001955961 | 0.011367376 | 0.866033887 |
| 650 | CYNr8c  | 1SSbcA | COPD | order.Actinomycetales.id.420                | -0.039974389 | 0.018733335 | 0.166445109 |
| 651 | d9u3Wa  | 1SSbcA | COPD | family.Lactobacillaceae.id.1836             | 0.013294236  | 0.030031959 | 0.676498928 |
| 652 | dP6VTT  | 1SSbcA | COPD | class.Alphaproteobacteria.id.2379           | -0.026332924 | 0.02214196  | 0.300101964 |
| 653 | dSCeM7  | 1SSbcA | COPD | order.Enterobacteriales.id.3468             | -0.020897554 | 0.039609738 | 0.620350949 |
| 654 | DwGyne  | 1SSbcA | COPD | family.BacteroidalesS24.7group.id.11173     | 0.015139817  | 0.02062203  | 0.490535993 |
| 655 | E1ZDX3  | 1SSbcA | COPD | genus.Oxalobacter.id.2978                   | -0.007884609 | 0.035380555 | 0.828626607 |
| 656 | e5mJnF  | 1SSbcA | COPD | genus.Dorea.id.1997                         | 0.00148171   | 0.021263438 | 0.946155972 |
| 657 | ebP4zV  | 1SSbcA | COPD | genus.Ruminococcus1.id.11373                | -0.007787919 | 0.017199398 | 0.662719009 |
| 658 | Fcq\$NY | 1SSbcA | COPD | family.Clostridiaceae1.id.1869              | -0.037213784 | 0.020109549 | 0.101390581 |
| 659 | fE3r8h  | 1SSbcA | COPD | phylum.Verrucomicrobia.id.3982              | -0.021178099 | 0.014501115 | 0.174860989 |
| 660 | FFi1Rd  | 1SSbcA | COPD | family.Actinomycetaceae.id.421              | -0.040016375 | 0.018703411 | 0.165772344 |
| 661 | FIVBaS  | 1SSbcA | COPD | order.Erysipelotrichales.id.2148            | -0.005861416 | 0.021611714 | 0.791247999 |
| 662 | Fr2Ff4  | 1SSbcA | COPD | class.Clostridia.id.1859                    | 0.030615881  | 0.029810002 | 0.334453283 |
| 663 | FRQYhm  | 1SSbcA | COPD | class.Gammaproteobacteria.id.3303           | 0.024255586  | 0.020646976 | 0.292980407 |

|     | A      | B      | C    | D                                             | E            | F           | G           |
|-----|--------|--------|------|-----------------------------------------------|--------------|-------------|-------------|
| 664 | FT7OrH | 1SSbcA | COPD | genus.Actinomyces.id.423                      | -0.057155839 | 0.015281649 | 0.013429298 |
| 665 | FXBXNG | 1SSbcA | COPD | family.FamilyXI.id.1936                       | -0.052920097 | 0.029487269 | 0.122854843 |
| 666 | gkAVOW | 1SSbcA | COPD | phylum.Lentisphaerae.id.2238                  | 0.00369671   | 0.022976175 | 0.876722492 |
| 667 | GNp2YQ | 1SSbcA | COPD | genus..Ruminococcusgavreauigroup.id.11342     | 0.013268895  | 0.023194087 | 0.581272875 |
| 668 | hUp1f  | 1SSbcA | COPD | genus.RikenellaceaeRC9gutgroup.id.11191       | 0.034078853  | 0.042396098 | 0.442213285 |
| 669 | l2CEyx | 1SSbcA | COPD | genus.Tyzzerella3.id.11335                    | -0.003840986 | 0.035728504 | 0.91651483  |
| 670 | l5XXsr | 1SSbcA | COPD | genus.Prevotella9.id.11183                    | -0.012556607 | 0.012202715 | 0.322244971 |
| 671 | iAhkfC | 1SSbcA | COPD | genus.Erysipelatoclostridium.id.11381         | 0.008287995  | 0.01637381  | 0.621209156 |
| 672 | lgBtIU | 1SSbcA | COPD | class.Bacilli.id.1673                         | -0.024157234 | 0.013663593 | 0.097389304 |
| 673 | lI0qrp | 1SSbcA | COPD | phylum.Actinobacteria.id.400                  | 0.004002731  | 0.020421796 | 0.84818184  |
| 674 | iMGTCd | 1SSbcA | COPD | genus.Ruminiclostridium5.id.11355             | -0.033608622 | 0.01853556  | 0.103210604 |
| 675 | iwPbIH | 1SSbcA | COPD | genus.Ruminiclostridium6.id.11356             | -0.009266647 | 0.013095134 | 0.491660993 |
| 676 | j0mByl | 1SSbcA | COPD | order.NB1n.id.3953                            | 0.014029374  | 0.017116169 | 0.431514165 |
| 677 | j4g0ZV | 1SSbcA | COPD | genus.CandidatusSoleaferrea.id.11350          | 0.057167493  | 0.060399954 | 0.37542078  |
| 678 | j87dXS | 1SSbcA | COPD | genus.Eisenbergiella.id.11304                 | -0.010031595 | 0.044623426 | 0.827151609 |
| 679 | jfZByg | 1SSbcA | COPD | order.Lactobacillales.id.1800                 | -0.027619883 | 0.011156476 | 0.029188122 |
| 680 | JHChB7 | 1SSbcA | COPD | genus.Adlercreutzia.id.812                    | 0.002923579  | 0.026615005 | 0.916112634 |
| 681 | jHia6Z | 1SSbcA | COPD | order.Pasteurellales.id.3688                  | -0.02078092  | 0.014406441 | 0.177031526 |
| 682 | jJC3Fm | 1SSbcA | COPD | genus.Enterorhabdus.id.820                    | -0.022792958 | 0.038158853 | 0.582464467 |
| 683 | jUcEpg | 1SSbcA | COPD | genus.Butyridimonas.id.945                    | 0.025513247  | 0.016909952 | 0.159531573 |
| 684 | kjA5PB | 1SSbcA | COPD | genus.RuminococcaceaeUCG010.id.11367          | -0.012748583 | 0.015696395 | 0.462247706 |
| 685 | kodRd1 | 1SSbcA | COPD | family.Defluviitaleaceae.id.1924              | 0.002980756  | 0.021043455 | 0.890478357 |
| 686 | LCZ8yH | 1SSbcA | COPD | genus.Prevotella7.id.11182                    | -0.008905817 | 0.026831267 | 0.747549311 |
| 687 | lUcL8y | 1SSbcA | COPD | genus.RuminococcaceaeUCG003.id.11361          | -0.018211172 | 0.014034224 | 0.223549723 |
| 688 | lKYg6S | 1SSbcA | COPD | genus.Terrisporobacter.id.11348               | 0.010198634  | 0.020293935 | 0.649854556 |
| 689 | LRKdla | 1SSbcA | COPD | family.Bifidobacteriaceae.id.433              | -0.010975832 | 0.020852613 | 0.612919404 |
| 690 | m0ByAU | 1SSbcA | COPD | order.Desulfovibrionales.id.3156              | -0.044556158 | 0.01910154  | 0.044557379 |
| 691 | m9LXEq | 1SSbcA | COPD | family.Enterobacteriaceae.id.3469             | -0.020897554 | 0.039609738 | 0.620350949 |
| 692 | MBOR7Y | 1SSbcA | COPD | family.Coriobacteriaceae.id.811               | -0.009390668 | 0.017896326 | 0.609331006 |
| 693 | MpL626 | 1SSbcA | COPD | genus.Lachnoclostridium.id.11308              | 0.030925474  | 0.018922812 | 0.130463557 |
| 694 | Msb4zz | 1SSbcA | COPD | class.Melainabacteria.id.1589                 | -0.002632185 | 0.014527987 | 0.860732164 |
| 695 | MXS84H | 1SSbcA | COPD | class.Negativicutes.id.2164                   | -0.021987181 | 0.014742206 | 0.166700647 |
| 696 | mz9jd0 | 1SSbcA | COPD | genus.Barnesiella.id.944                      | 0.003695389  | 0.018763766 | 0.847817434 |
| 697 | n3j0op | 1SSbcA | COPD | class.Deltaproteobacteria.id.3087             | -0.060230265 | 0.022365921 | 0.022585115 |
| 698 | nFIaU5 | 1SSbcA | COPD | family.Lachnospiraceae.id.1987                | -0.002988726 | 0.012966178 | 0.82103619  |
| 699 | nlesEv | 1SSbcA | COPD | genus.Peptococcus.id.2037                     | 0.010509367  | 0.018636813 | 0.585243249 |
| 700 | NKNDGp | 1SSbcA | COPD | order.Methanobacteriales.id.120               | 0.068919197  | 0.032336345 | 0.077068389 |
| 701 | nnD7ru | 1SSbcA | COPD | genus..Eubacteriumoxidoreducensgroup.id.11339 | -0.016798767 | 0.026227753 | 0.567415583 |
| 702 | NqdTjG | 1SSbcA | COPD | genus.FamilyXIIID3011group.id.11293           | -0.000732565 | 0.038522063 | 0.985168288 |
| 703 | nQH0yD | 1SSbcA | COPD | class.Lentisphaeria.id.2250                   | 0.004758798  | 0.024348334 | 0.851494165 |
| 704 | nRNBx9 | 1SSbcA | COPD | class.Mollicutes.id.3920                      | -0.006458742 | 0.016856855 | 0.70962584  |
| 705 | 00n2Pz | 1SSbcA | COPD | family.Bacteroidaceae.id.917                  | 0.003362566  | 0.039719452 | 0.935287447 |
| 706 | obtxsV | 1SSbcA | COPD | family.Veillonellaceae.id.2172                | 0.001978589  | 0.009356969 | 0.835201208 |
| 707 | oChqj7 | 1SSbcA | COPD | phylum.Bacteroidetes.id.905                   | 0.020188922  | 0.014038902 | 0.188358009 |
| 708 | oGD8An | 1SSbcA | COPD | order.Coriobacteriales.id.810                 | -0.009390668 | 0.017896326 | 0.609331006 |
| 709 | OhSZ6N | 1SSbcA | COPD | genus.RuminococcaceaeUCG002.id.11360          | 0.021167632  | 0.013873808 | 0.144457171 |
| 710 | oIDISu | 1SSbcA | COPD | genus..Eubacteriumnodatumgroup.id.11297       | -0.01323564  | 0.02060763  | 0.536713613 |
| 711 | OtCS03 | 1SSbcA | COPD | genus.Alloprevotella.id.961                   | 0.019757497  | 0.053293679 | 0.735470039 |
| 712 | oU56W6 | 1SSbcA | COPD | family.Peptostreptococcaceae.id.2042          | -0.010902348 | 0.009640405 | 0.282150684 |
| 713 | Oxkiqb | 1SSbcA | COPD | order.Clostridiales.id.1863                   | 0.022554315  | 0.026893962 | 0.423385872 |
| 714 | P9709V | 1SSbcA | COPD | genus..Eubacteriumhalliigroup.id.11338        | -0.000748787 | 0.014492251 | 0.959643264 |

|     | A      | B      | C    | D                                                 | E            | F           | G           |
|-----|--------|--------|------|---------------------------------------------------|--------------|-------------|-------------|
| 715 | PcT6eJ | 1SSbcA | COPD | phylum.Cyanobacteria.id.1500                      | -0.001750358 | 0.021717169 | 0.938382916 |
| 716 | pCXx5P | 1SSbcA | COPD | genus.Phascolarctobacterium.id.2168               | -0.057301977 | 0.026781501 | 0.076191355 |
| 717 | PGIGHi | 1SSbcA | COPD | genus.LachnospiraceaeUCG008.id.11328              | -0.026781112 | 0.023713496 | 0.295955861 |
| 718 | pXAgfu | 1SSbcA | COPD | family.Acidaminococcaceae.id.2166                 | 0.009703026  | 0.038667542 | 0.811850586 |
| 719 | q1bO5E | 1SSbcA | COPD | genus.Lactobacillus.id.1837                       | -0.004928715 | 0.027736012 | 0.865932717 |
| 720 | Q3dvBY | 1SSbcA | COPD | genus.Methanobrevibacter.id.123                   | 0.065604756  | 0.054861327 | 0.317665136 |
| 721 | Q46NVk | 1SSbcA | COPD | genus.Intestinibacter.id.11345                    | 0.004293171  | 0.012927562 | 0.745111504 |
| 722 | qE3Gq8 | 1SSbcA | COPD | genus..Ruminococcustorquesgroup.id.14377          | -0.003837376 | 0.019253727 | 0.849875293 |
| 723 | qENAoR | 1SSbcA | COPD | genus.Victivallis.id.2256                         | 0.052868631  | 0.038630444 | 0.208327381 |
| 724 | QGrGNV | 1SSbcA | COPD | genus.Haemophilus.id.3698                         | -0.004747542 | 0.021626126 | 0.832502907 |
| 725 | qiWbrh | 1SSbcA | COPD | order.Selenomonadales.id.2165                     | -0.021987181 | 0.014742206 | 0.166700647 |
| 726 | QjakFr | 1SSbcA | COPD | genus.LachnospiraceaeFCS020group.id.11314         | 0.014666687  | 0.014905344 | 0.348329148 |
| 727 | Qyd7XB | 1SSbcA | COPD | genus..Eubacteriumxylanophilumgroup.id.14375      | 0.01430758   | 0.019199073 | 0.480405367 |
| 728 | R6RQXL | 1SSbcA | COPD | genus..Ruminococcusgnavusgroup.id.14376           | -0.007266637 | 0.026046916 | 0.786562727 |
| 729 | R7oLoV | 1SSbcA | COPD | genus.RuminococcaceaeUCG011.id.11368              | 0.039718098  | 0.024321614 | 0.163389432 |
| 730 | RKITkD | 1SSbcA | COPD | genus.Bifidobacterium.id.436                      | -0.025358064 | 0.01404178  | 0.104410618 |
| 731 | rlb7o5 | 1SSbcA | COPD | genus..Eubacteriumcoprostanoligenesgroup.id.11375 | 0.030484226  | 0.016899967 | 0.101421712 |
| 732 | RmoHnu | 1SSbcA | COPD | genus.Ruminiclostridium9.id.11357                 | 0.034149537  | 0.025676595 | 0.231844322 |
| 733 | rsbOlb | 1SSbcA | COPD | order.MollicutesRF9.id.11579                      | 0.023348279  | 0.012768783 | 0.097407433 |
| 734 | Rv99Lm | 1SSbcA | COPD | genus..Eubacteriumbrachygroup.id.11296            | -0.032054112 | 0.02500314  | 0.235743162 |
| 735 | sF7W2L | 1SSbcA | COPD | genus.Howardella.id.2000                          | -0.02185379  | 0.021201363 | 0.336940467 |
| 736 | sFxDb3 | 1SSbcA | COPD | order.Burkholderiales.id.2874                     | -0.015515736 | 0.019542708 | 0.453299386 |
| 737 | Sgv0J4 | 1SSbcA | COPD | family.Victivallaceae.id.2255                     | -0.017624614 | 0.02200397  | 0.443776906 |
| 738 | SpO9Ka | 1SSbcA | COPD | family.Porphyromonadaceae.id.943                  | 0.021514725  | 0.032640333 | 0.530880125 |
| 739 | staWrf | 1SSbcA | COPD | order.Rhodospirillales.id.2667                    | 0.011056448  | 0.016933945 | 0.527220631 |
| 740 | szt6bn | 1SSbcA | COPD | class.Coriobacteriia.id.809                       | -0.009390668 | 0.017896326 | 0.609331006 |
| 741 | T35lgz | 1SSbcA | COPD | family.Oxalobacteraceae.id.2966                   | -0.015204011 | 0.026328022 | 0.57428816  |
| 742 | T8T6Lu | 1SSbcA | COPD | family.Peptococcaceae.id.2024                     | -0.005182838 | 0.014197906 | 0.725859557 |
| 743 | tbXTaX | 1SSbcA | COPD | genus.ChristensenellaceaeR.7group.id.11283        | 0.048399463  | 0.029609548 | 0.153252804 |
| 744 | TGrzdF | 1SSbcA | COPD | genus..Eubacteriumfissicatengroup.id.14373        | -0.006090043 | 0.030312985 | 0.846485361 |
| 745 | tkl5vG | 1SSbcA | COPD | genus.Slackia.id.825                              | 0.007650995  | 0.04212415  | 0.864705945 |
| 746 | TIODZI | 1SSbcA | COPD | genus.RuminococcaceaeUCG004.id.11362              | 0.051961701  | 0.0281477   | 0.097966642 |
| 747 | TQSpIB | 1SSbcA | COPD | genus.LachnospiraceaeUCG004.id.11324              | -0.012626956 | 0.017602436 | 0.491360831 |
| 748 | tSliO9 | 1SSbcA | COPD | order.Bacteroidales.id.913                        | 0.016545027  | 0.01268762  | 0.221440655 |
| 749 | TUj4LC | 1SSbcA | COPD | genus.LachnospiraceaeNC2004group.id.11316         | 0.015900547  | 0.026037695 | 0.560711934 |
| 750 | uCOF7P | 1SSbcA | COPD | order.Bacillales.id.1674                          | -0.013033855 | 0.033506721 | 0.713296108 |
| 751 | uHEy8Q | 1SSbcA | COPD | genus.Akkermansia.id.4037                         | -0.014412291 | 0.020466838 | 0.49913562  |
| 752 | uQYGEB | 1SSbcA | COPD | genus.Parabacteroides.id.954                      | 0.033935267  | 0.053432072 | 0.570485437 |
| 753 | UsMxlz | 1SSbcA | COPD | class.Verrucomicrobiae.id.4029                    | -0.014427529 | 0.020478013 | 0.498922069 |
| 754 | UTPK2n | 1SSbcA | COPD | class.Bacteroidia.id.912                          | 0.016545027  | 0.01268762  | 0.221440655 |
| 755 | UYJxH8 | 1SSbcA | COPD | genus.Butyrivibrio.id.1993                        | 0.017050566  | 0.016343321 | 0.315834507 |
| 756 | Vd8Fsi | 1SSbcA | COPD | genus.Bacteroides.id.918                          | 0.003362566  | 0.039719452 | 0.935287447 |
| 757 | vlyGOP | 1SSbcA | COPD | family.Ruminococcaceae.id.2050                    | -0.008752912 | 0.012336199 | 0.498150137 |
| 758 | W49IoY | 1SSbcA | COPD | genus.Olsenella.id.822                            | -0.003088026 | 0.014561296 | 0.8373552   |
| 759 | w5yhuV | 1SSbcA | COPD | genus.Romboutsia.id.11347                         | -0.015803248 | 0.013620427 | 0.270505507 |
| 760 | WaNFee | 1SSbcA | COPD | genus.Desulfovibrio.id.3173                       | 0.019810581  | 0.016060426 | 0.252398241 |
| 761 | WCt5pC | 1SSbcA | COPD | genus.Anaerofilum.id.2053                         | 0.028778765  | 0.025027264 | 0.283398591 |
| 762 | WEMGli | 1SSbcA | COPD | family.Alcaligenaceae.id.2875                     | -0.017576615 | 0.021969556 | 0.446789162 |
| 763 | wFbL6J | 1SSbcA | COPD | genus.Marvinbryantia.id.2005                      | -0.008561874 | 0.021468702 | 0.700468543 |
| 764 | wlF1Yn | 1SSbcA | COPD | genus.LachnospiraceaeUCG001.id.11321              | -0.025394804 | 0.019830867 | 0.22668752  |
| 765 | wJFco0 | 1SSbcA | COPD | genus.Veillonella.id.2198                         | -0.198681345 | 0.211920455 | 0.41764909  |

|     | A      | B      | C    | D                                         | E            | F           | G           |
|-----|--------|--------|------|-------------------------------------------|--------------|-------------|-------------|
| 766 | wn5rK2 | 1SSbcA | COPD | genus.ErysipelotrichaceaeUCG003.id.11384  | -0.039788137 | 0.014144965 | 0.013825171 |
| 767 | wQYhwp | 1SSbcA | COPD | genus.Odoribacter.id.952                  | 0.041327631  | 0.022596085 | 0.126935237 |
| 768 | WvdQyb | 1SSbcA | COPD | genus..Eubacteriumeligensgroup.id.14372   | 0.057501803  | 0.025716983 | 0.089021324 |
| 769 | X4kHrP | 1SSbcA | COPD | class.Betaproteobacteria.id.2867          | -0.01235086  | 0.019348948 | 0.54110178  |
| 770 | xCuklr | 1SSbcA | COPD | genus.Dialister.id.2183                   | -0.033119945 | 0.018774279 | 0.111537056 |
| 771 | Xtktja | 1SSbcA | COPD | family.Pasteurellaceae.id.3689            | -0.02078092  | 0.014406441 | 0.177031526 |
| 772 | XTu0EY | 1SSbcA | COPD | genus.Intestinimonas.id.2062              | 0.009346372  | 0.011350719 | 0.424076268 |
| 773 | XVFzMF | 1SSbcA | COPD | genus.Holdemania.id.2157                  | -0.013921823 | 0.013678456 | 0.330640524 |
| 774 | y0FJ9U | 1SSbcA | COPD | genus.LachnospiraceaeND3007group.id.11317 | -0.162476983 | 0.132518917 | 0.435569492 |
| 775 | Y7cF3n | 1SSbcA | COPD | family.Methanobacteriaceae.id.121         | 0.068919197  | 0.032336345 | 0.077068389 |
| 776 | yakWtY | 1SSbcA | COPD | genus.Butyricoccus.id.2055                | -0.02810285  | 0.012198193 | 0.060778587 |
| 777 | yerINC | 1SSbcA | COPD | genus.RuminococcaceaeUCG005.id.11363      | -0.00056057  | 0.014807065 | 0.970423186 |
| 778 | yfxJv6 | 1SSbcA | COPD | family.Erysipelotrichaceae.id.2149        | -0.005861416 | 0.021611714 | 0.791247999 |
| 779 | ygbSF7 | 1SSbcA | COPD | genus.Fusicatenibacter.id.11305           | 0.020314386  | 0.014140971 | 0.170108075 |
| 780 | ylev3A | 1SSbcA | COPD | family.FamilyXIII.id.1957                 | -0.00823759  | 0.021733462 | 0.720229379 |
| 781 | yLt27i | 1SSbcA | COPD | genus.Senegalimassilia.id.11160           | 0.004017826  | 0.027735997 | 0.894006396 |
| 782 | YXZeGZ | 1SSbcA | COPD | genus.Alistipes.id.968                    | 0.016746135  | 0.021271199 | 0.449381407 |
| 783 | YYHfMs | 1SSbcA | COPD | genus.Gordonibacter.id.821                | -0.011637241 | 0.020944322 | 0.592007092 |
| 784 | zaZf8A | 1SSbcA | COPD | genus.Oscillospira.id.2064                | 0.035246154  | 0.025360575 | 0.213962459 |
| 785 | ZJXDpG | 1SSbcA | COPD | class.Erysipelotrichia.id.2147            | -0.005861416 | 0.021611714 | 0.791247999 |
| 786 | zkWLyl | 1SSbcA | COPD | genus.Allisonella.id.2174                 | -0.054570987 | 0.035943075 | 0.179748037 |

|    | A                                                      | B          | C                                                         | D                                       | E                         | F           | G    | H           |
|----|--------------------------------------------------------|------------|-----------------------------------------------------------|-----------------------------------------|---------------------------|-------------|------|-------------|
| 1  | Supplementary table S7: Results of heterogeneity tests |            |                                                           |                                         |                           |             |      |             |
| 2  | id.exposure                                            | id.outcome | outcome                                                   | exposure                                | method                    | Q           | Q_df | Q_pval      |
| 3  | 0aMbT3                                                 | vLGi8p     | Forced expiratory volume in 1-second (FEV1), Best measure | genus.Eggerthella.id.819                | MR Egger                  | 23.91071843 | 9    | 0.004444717 |
| 4  | 0aMbT3                                                 | vLGi8p     | Forced expiratory volume in 1-second (FEV1), Best measure | genus.Eggerthella.id.819                | Inverse variance weighted | 32.59127409 | 10   | 0.000318974 |
| 5  | 0heWA4                                                 | vLGi8p     | Forced expiratory volume in 1-second (FEV1), Best measure | genus.Lactococcus.id.1851               | MR Egger                  | 6.86883862  | 7    | 0.442663052 |
| 6  | 0heWA4                                                 | vLGi8p     | Forced expiratory volume in 1-second (FEV1), Best measure | genus.Lactococcus.id.1851               | Inverse variance weighted | 7.540810391 | 8    | 0.479558306 |
| 7  | 0lsDJy                                                 | vLGi8p     | Forced expiratory volume in 1-second (FEV1), Best measure | genus.DefluviitaleaceaeUCG011.id.11287  | MR Egger                  | 9.620484679 | 7    | 0.211119457 |
| 8  | 0lsDJy                                                 | vLGi8p     | Forced expiratory volume in 1-second (FEV1), Best measure | genus.DefluviitaleaceaeUCG011.id.11287  | Inverse variance weighted | 10.13634771 | 8    | 0.255586256 |
| 9  | 0ngO8p                                                 | vLGi8p     | Forced expiratory volume in 1-second (FEV1), Best measure | genus.Flavonifractor.id.2059            | MR Egger                  | 23.05748296 | 3    | 3.92841E-05 |
| 10 | 0ngO8p                                                 | vLGi8p     | Forced expiratory volume in 1-second (FEV1), Best measure | genus.Flavonifractor.id.2059            | Inverse variance weighted | 23.29036651 | 4    | 0.000110786 |
| 11 | 0rTnk2                                                 | vLGi8p     | Forced expiratory volume in 1-second (FEV1), Best measure | genus.Lachnospira.id.2004               | MR Egger                  | 10.84440448 | 4    | 0.028369486 |
| 12 | 0rTnk2                                                 | vLGi8p     | Forced expiratory volume in 1-second (FEV1), Best measure | genus.Lachnospira.id.2004               | Inverse variance weighted | 12.02886239 | 5    | 0.034394432 |
| 13 | 0rWmph                                                 | vLGi8p     | Forced expiratory volume in 1-second (FEV1), Best measure | phylum.Firmicutes.id.1672               | MR Egger                  | 45.31645606 | 14   | 3.6239E-05  |
| 14 | 0rWmph                                                 | vLGi8p     | Forced expiratory volume in 1-second (FEV1), Best measure | phylum.Firmicutes.id.1672               | Inverse variance weighted | 47.97658765 | 15   | 2.56525E-05 |
| 15 | 0Vfsi1                                                 | vLGi8p     | Forced expiratory volume in 1-second (FEV1), Best measure | genus.Hungatella.id.11306               | MR Egger                  | 2.067476752 | 3    | 0.558520407 |
| 16 | 0Vfsi1                                                 | vLGi8p     | Forced expiratory volume in 1-second (FEV1), Best measure | genus.Hungatella.id.11306               | Inverse variance weighted | 3.322896627 | 4    | 0.505312686 |
| 17 | 1rpkul                                                 | vLGi8p     | Forced expiratory volume in 1-second (FEV1), Best measure | genus.FamilyXIIICUG001.id.11294         | MR Egger                  | 6.752081488 | 6    | 0.344384364 |
| 18 | 1rpkul                                                 | vLGi8p     | Forced expiratory volume in 1-second (FEV1), Best measure | genus.FamilyXIIICUG001.id.11294         | Inverse variance weighted | 10.07059969 | 7    | 0.184607828 |
| 19 | 1uqUdL                                                 | vLGi8p     | Forced expiratory volume in 1-second (FEV1), Best measure | genus.Escherichia.Shigella.id.3504      | MR Egger                  | 6.633391348 | 8    | 0.576652772 |
| 20 | 1uqUdL                                                 | vLGi8p     | Forced expiratory volume in 1-second (FEV1), Best measure | genus.Escherichia.Shigella.id.3504      | Inverse variance weighted | 6.672933305 | 9    | 0.67112916  |
| 21 | 1zf0TZ                                                 | vLGi8p     | Forced expiratory volume in 1-second (FEV1), Best measure | family.Streptococcaceae.id.1850         | MR Egger                  | 22.08598286 | 10   | 0.014672514 |
| 22 | 1zf0TZ                                                 | vLGi8p     | Forced expiratory volume in 1-second (FEV1), Best measure | family.Streptococcaceae.id.1850         | Inverse variance weighted | 26.9595426  | 11   | 0.004660329 |
| 23 | 20HL0T                                                 | vLGi8p     | Forced expiratory volume in 1-second (FEV1), Best measure | genus.Holdemanella.id.11393             | MR Egger                  | 11.1005622  | 9    | 0.268878869 |
| 24 | 20HL0T                                                 | vLGi8p     | Forced expiratory volume in 1-second (FEV1), Best measure | genus.Holdemanella.id.11393             | Inverse variance weighted | 14.27761881 | 10   | 0.160700999 |
| 25 | 2GJP3o                                                 | vLGi8p     | Forced expiratory volume in 1-second (FEV1), Best measure | genus.Ruminococcus2.id.11374            | MR Egger                  | 4.752960402 | 12   | 0.965725292 |
| 26 | 2GJP3o                                                 | vLGi8p     | Forced expiratory volume in 1-second (FEV1), Best measure | genus.Ruminococcus2.id.11374            | Inverse variance weighted | 8.352408135 | 13   | 0.819907935 |
| 27 | 2neTKK                                                 | vLGi8p     | Forced expiratory volume in 1-second (FEV1), Best measure | phylum.Euryarchaeota.id.55              | MR Egger                  | 3.230182248 | 9    | 0.954465419 |
| 28 | 2neTKK                                                 | vLGi8p     | Forced expiratory volume in 1-second (FEV1), Best measure | phylum.Euryarchaeota.id.55              | Inverse variance weighted | 3.392205938 | 10   | 0.970632293 |
| 29 | 2vslhf                                                 | vLGi8p     | Forced expiratory volume in 1-second (FEV1), Best measure | genus.Coproccoccus2.id.11302            | MR Egger                  | 5.27223788  | 6    | 0.509400368 |
| 30 | 2vslhf                                                 | vLGi8p     | Forced expiratory volume in 1-second (FEV1), Best measure | genus.Coproccoccus2.id.11302            | Inverse variance weighted | 13.38800069 | 7    | 0.063200493 |
| 31 | 31r1VV                                                 | vLGi8p     | Forced expiratory volume in 1-second (FEV1), Best measure | family.Christensenellaceae.id.1866      | MR Egger                  | 11.43722113 | 9    | 0.246925387 |
| 32 | 31r1VV                                                 | vLGi8p     | Forced expiratory volume in 1-second (FEV1), Best measure | family.Christensenellaceae.id.1866      | Inverse variance weighted | 11.45987599 | 10   | 0.322828617 |
| 33 | 37ZEpl                                                 | vLGi8p     | Forced expiratory volume in 1-second (FEV1), Best measure | genus..Eubacteriumrectalegroup.id.14374 | MR Egger                  | 5.831008589 | 6    | 0.44238458  |
| 34 | 37ZEpl                                                 | vLGi8p     | Forced expiratory volume in 1-second (FEV1), Best measure | genus..Eubacteriumrectalegroup.id.14374 | Inverse variance weighted | 12.8148223  | 7    | 0.076750823 |
| 35 | 3cQJ1f                                                 | vLGi8p     | Forced expiratory volume in 1-second (FEV1), Best measure | class.Actinobacteria.id.419             | MR Egger                  | 17.76122469 | 11   | 0.087288981 |
| 36 | 3cQJ1f                                                 | vLGi8p     | Forced expiratory volume in 1-second (FEV1), Best measure | class.Actinobacteria.id.419             | Inverse variance weighted | 17.81459245 | 12   | 0.1214372   |
| 37 | 3Oo7Td                                                 | vLGi8p     | Forced expiratory volume in 1-second (FEV1), Best measure | class.Methanobacteria.id.119            | MR Egger                  | 8.302104785 | 6    | 0.216795252 |
| 38 | 3Oo7Td                                                 | vLGi8p     | Forced expiratory volume in 1-second (FEV1), Best measure | class.Methanobacteria.id.119            | Inverse variance weighted | 8.30644583  | 7    | 0.306348964 |
| 39 | 3tgfXE                                                 | vLGi8p     | Forced expiratory volume in 1-second (FEV1), Best measure | genus.Subdoligranulum.id.2070           | MR Egger                  | 16.91668341 | 8    | 0.030988436 |
| 40 | 3tgfXE                                                 | vLGi8p     | Forced expiratory volume in 1-second (FEV1), Best measure | genus.Subdoligranulum.id.2070           | Inverse variance weighted | 18.86322761 | 9    | 0.026381284 |
| 41 | 4zBtt2                                                 | vLGi8p     | Forced expiratory volume in 1-second (FEV1), Best measure | genus.Bilophila.id.3170                 | MR Egger                  | 22.27262172 | 10   | 0.01377443  |
| 42 | 4zBtt2                                                 | vLGi8p     | Forced expiratory volume in 1-second (FEV1), Best measure | genus.Bilophila.id.3170                 | Inverse variance weighted | 24.29298521 | 11   | 0.011552981 |
| 43 | 5IXuob                                                 | vLGi8p     | Forced expiratory volume in 1-second (FEV1), Best measure | genus.RuminococcaceaeUCG014.id.11371    | MR Egger                  | 9.333341302 | 9    | 0.407090128 |
| 44 | 5IXuob                                                 | vLGi8p     | Forced expiratory volume in 1-second (FEV1), Best measure | genus.RuminococcaceaeUCG014.id.11371    | Inverse variance weighted | 9.485834976 | 10   | 0.486698009 |
| 45 | 5qEcKL                                                 | vLGi8p     | Forced expiratory volume in 1-second (FEV1), Best measure | genus.Streptococcus.id.1853             | MR Egger                  | 28.02340543 | 12   | 0.0054886   |
| 46 | 5qEcKL                                                 | vLGi8p     | Forced expiratory volume in 1-second (FEV1), Best measure | genus.Streptococcus.id.1853             | Inverse variance weighted | 36.51417497 | 13   | 0.000493509 |
| 47 | 5TN0Z7                                                 | vLGi8p     | Forced expiratory volume in 1-second (FEV1), Best measure | genus.Oscillibacter.id.2063             | MR Egger                  | 10.10171268 | 9    | 0.342313958 |
| 48 | 5TN0Z7                                                 | vLGi8p     | Forced expiratory volume in 1-second (FEV1), Best measure | genus.Oscillibacter.id.2063             | Inverse variance weighted | 10.87415349 | 10   | 0.367406368 |
| 49 | 5XtLwc                                                 | vLGi8p     | Forced expiratory volume in 1-second (FEV1), Best measure | genus.Catenibacterium.id.2153           | MR Egger                  | 3.838275026 | 3    | 0.279465383 |
| 50 | 5XtLwc                                                 | vLGi8p     | Forced expiratory volume in 1-second (FEV1), Best measure | genus.Catenibacterium.id.2153           | Inverse variance weighted | 7.30543122  | 4    | 0.120601379 |
| 51 | 6gX3qe                                                 | vLGi8p     | Forced expiratory volume in 1-second (FEV1), Best measure | phylum.Tenericutes.id.3919              | MR Egger                  | 21.97761571 | 10   | 0.015219041 |

|     | A      | B      | C                                                         | D                                           | E                         | F           | G  | H           |
|-----|--------|--------|-----------------------------------------------------------|---------------------------------------------|---------------------------|-------------|----|-------------|
| 52  | 6gX3qe | vLGi8p | Forced expiratory volume in 1-second (FEV1), Best measure | phylum.Tenericutes.id.3919                  | Inverse variance weighted | 25.33052993 | 11 | 0.008153034 |
| 53  | 6jMcBB | vLGi8p | Forced expiratory volume in 1-second (FEV1), Best measure | family.Desulfovibrionaceae.id.3169          | MR Egger                  | 6.488055618 | 8  | 0.592732823 |
| 54  | 6jMcBB | vLGi8p | Forced expiratory volume in 1-second (FEV1), Best measure | family.Desulfovibrionaceae.id.3169          | Inverse variance weighted | 6.925352709 | 9  | 0.644891148 |
| 55  | 6mlWxZ | vLGi8p | Forced expiratory volume in 1-second (FEV1), Best measure | genus.Coprobacter.id.949                    | MR Egger                  | 17.89597807 | 9  | 0.036399738 |
| 56  | 6mlWxZ | vLGi8p | Forced expiratory volume in 1-second (FEV1), Best measure | genus.Coprobacter.id.949                    | Inverse variance weighted | 19.73002058 | 10 | 0.031912168 |
| 57  | 77YJKV | vLGi8p | Forced expiratory volume in 1-second (FEV1), Best measure | genus..Eubacteriumruminantiumgroup.id.11340 | MR Egger                  | 28.88024011 | 16 | 0.024756266 |
| 58  | 77YJKV | vLGi8p | Forced expiratory volume in 1-second (FEV1), Best measure | genus..Eubacteriumruminantiumgroup.id.11340 | Inverse variance weighted | 28.89794854 | 17 | 0.035478779 |
| 59  | 7aTYpg | vLGi8p | Forced expiratory volume in 1-second (FEV1), Best measure | genus.Collinsella.id.815                    | MR Egger                  | 3.046766797 | 7  | 0.880642462 |
| 60  | 7aTYpg | vLGi8p | Forced expiratory volume in 1-second (FEV1), Best measure | genus.Collinsella.id.815                    | Inverse variance weighted | 3.358473216 | 8  | 0.909891749 |
| 61  | 7dqlOH | vLGi8p | Forced expiratory volume in 1-second (FEV1), Best measure | genus..Clostridiuminnocuumgroup.id.14397    | MR Egger                  | 2.04011745  | 7  | 0.957586597 |
| 62  | 7dqlOH | vLGi8p | Forced expiratory volume in 1-second (FEV1), Best measure | genus..Clostridiuminnocuumgroup.id.14397    | Inverse variance weighted | 2.086904891 | 8  | 0.978231064 |
| 63  | 7ioeKt | vLGi8p | Forced expiratory volume in 1-second (FEV1), Best measure | phylum.Proteobacteria.id.2375               | MR Egger                  | 32.34549117 | 9  | 0.000173515 |
| 64  | 7ioeKt | vLGi8p | Forced expiratory volume in 1-second (FEV1), Best measure | phylum.Proteobacteria.id.2375               | Inverse variance weighted | 33.17068217 | 10 | 0.000254966 |
| 65  | 80h8vf | vLGi8p | Forced expiratory volume in 1-second (FEV1), Best measure | genus.Anaerostipes.id.1991                  | MR Egger                  | 24.01172238 | 10 | 0.007569337 |
| 66  | 80h8vf | vLGi8p | Forced expiratory volume in 1-second (FEV1), Best measure | genus.Anaerostipes.id.1991                  | Inverse variance weighted | 24.02770738 | 11 | 0.012616895 |
| 67  | 8jKldu | vLGi8p | Forced expiratory volume in 1-second (FEV1), Best measure | genus.Coproccoccus3.id.11303                | MR Egger                  | 5.416824653 | 7  | 0.60923442  |
| 68  | 8jKldu | vLGi8p | Forced expiratory volume in 1-second (FEV1), Best measure | genus.Coproccoccus3.id.11303                | Inverse variance weighted | 5.685262923 | 8  | 0.682439263 |
| 69  | 8NULRM | vLGi8p | Forced expiratory volume in 1-second (FEV1), Best measure | genus.Paraprevotella.id.962                 | MR Egger                  | 15.90323468 | 10 | 0.102436127 |
| 70  | 8NULRM | vLGi8p | Forced expiratory volume in 1-second (FEV1), Best measure | genus.Paraprevotella.id.962                 | Inverse variance weighted | 16.14223893 | 11 | 0.135931921 |
| 71  | 9i4tiU | vLGi8p | Forced expiratory volume in 1-second (FEV1), Best measure | order.Gastranaerophilales.id.1591           | MR Egger                  | 23.41889662 | 7  | 0.001440553 |
| 72  | 9i4tiU | vLGi8p | Forced expiratory volume in 1-second (FEV1), Best measure | order.Gastranaerophilales.id.1591           | Inverse variance weighted | 31.75498093 | 8  | 0.000103037 |
| 73  | 9s731W | vLGi8p | Forced expiratory volume in 1-second (FEV1), Best measure | genus.RuminococcaceaeUCG009.id.11366        | MR Egger                  | 18.21969693 | 10 | 0.051368833 |
| 74  | 9s731W | vLGi8p | Forced expiratory volume in 1-second (FEV1), Best measure | genus.RuminococcaceaeUCG009.id.11366        | Inverse variance weighted | 20.45390474 | 11 | 0.039490765 |
| 75  | acLMuF | vLGi8p | Forced expiratory volume in 1-second (FEV1), Best measure | genus.Parasutterella.id.2892                | MR Egger                  | 22.53066696 | 12 | 0.031985189 |
| 76  | acLMuF | vLGi8p | Forced expiratory volume in 1-second (FEV1), Best measure | genus.Parasutterella.id.2892                | Inverse variance weighted | 23.05829392 | 13 | 0.04098202  |
| 77  | AdsBD9 | vLGi8p | Forced expiratory volume in 1-second (FEV1), Best measure | genus.Turicibacter.id.2162                  | MR Egger                  | 5.399459598 | 8  | 0.714151745 |
| 78  | AdsBD9 | vLGi8p | Forced expiratory volume in 1-second (FEV1), Best measure | genus.Turicibacter.id.2162                  | Inverse variance weighted | 5.629642018 | 9  | 0.776336305 |
| 79  | aGfu8V | vLGi8p | Forced expiratory volume in 1-second (FEV1), Best measure | order.Bifidobacteriales.id.432              | MR Egger                  | 17.05103094 | 8  | 0.029582064 |
| 80  | aGfu8V | vLGi8p | Forced expiratory volume in 1-second (FEV1), Best measure | order.Bifidobacteriales.id.432              | Inverse variance weighted | 18.00642432 | 9  | 0.035099079 |
| 81  | AK0I7A | vLGi8p | Forced expiratory volume in 1-second (FEV1), Best measure | genus.LachnospiraceaeUCG010.id.11330        | MR Egger                  | 8.093109677 | 8  | 0.424428181 |
| 82  | AK0I7A | vLGi8p | Forced expiratory volume in 1-second (FEV1), Best measure | genus.LachnospiraceaeUCG010.id.11330        | Inverse variance weighted | 10.83197113 | 9  | 0.287402592 |
| 83  | aKuChq | vLGi8p | Forced expiratory volume in 1-second (FEV1), Best measure | genus.Faecalibacterium.id.2057              | MR Egger                  | 16.26878779 | 7  | 0.022770977 |
| 84  | aKuChq | vLGi8p | Forced expiratory volume in 1-second (FEV1), Best measure | genus.Faecalibacterium.id.2057              | Inverse variance weighted | 16.67333327 | 8  | 0.033696199 |
| 85  | aKXyAu | vLGi8p | Forced expiratory volume in 1-second (FEV1), Best measure | genus.Blautia.id.1992                       | MR Egger                  | 10.51350203 | 10 | 0.396653213 |
| 86  | aKXyAu | vLGi8p | Forced expiratory volume in 1-second (FEV1), Best measure | genus.Blautia.id.1992                       | Inverse variance weighted | 10.64854504 | 11 | 0.473159153 |
| 87  | AN8qjo | vLGi8p | Forced expiratory volume in 1-second (FEV1), Best measure | genus.Clostridiumsensustricto1.id.1873      | MR Egger                  | 10.15040451 | 5  | 0.071084059 |
| 88  | AN8qjo | vLGi8p | Forced expiratory volume in 1-second (FEV1), Best measure | genus.Clostridiumsensustricto1.id.1873      | Inverse variance weighted | 12.44751079 | 6  | 0.052698383 |
| 89  | anDrA2 | vLGi8p | Forced expiratory volume in 1-second (FEV1), Best measure | genus..Eubacteriumventriosumgroup.id.11341  | MR Egger                  | 16.6789386  | 12 | 0.162078862 |
| 90  | anDrA2 | vLGi8p | Forced expiratory volume in 1-second (FEV1), Best measure | genus..Eubacteriumventriosumgroup.id.11341  | Inverse variance weighted | 17.59579792 | 13 | 0.1734784   |
| 91  | ASQ2fp | vLGi8p | Forced expiratory volume in 1-second (FEV1), Best measure | genus.RuminococcaceaeNK4A214group.id.11358  | MR Egger                  | 20.72049518 | 11 | 0.036385167 |
| 92  | ASQ2fp | vLGi8p | Forced expiratory volume in 1-second (FEV1), Best measure | genus.RuminococcaceaeNK4A214group.id.11358  | Inverse variance weighted | 25.42724531 | 12 | 0.012923116 |
| 93  | aToCrK | vLGi8p | Forced expiratory volume in 1-second (FEV1), Best measure | genus.Anaerotruncus.id.2054                 | MR Egger                  | 32.87342896 | 11 | 0.00055159  |
| 94  | aToCrK | vLGi8p | Forced expiratory volume in 1-second (FEV1), Best measure | genus.Anaerotruncus.id.2054                 | Inverse variance weighted | 33.50505719 | 12 | 0.000806971 |
| 95  | axDRMS | vLGi8p | Forced expiratory volume in 1-second (FEV1), Best measure | family.Prevotellaceae.id.960                | MR Egger                  | 11.479768   | 13 | 0.570692508 |
| 96  | axDRMS | vLGi8p | Forced expiratory volume in 1-second (FEV1), Best measure | family.Prevotellaceae.id.960                | Inverse variance weighted | 12.61064971 | 14 | 0.557384127 |
| 97  | AXpdwL | vLGi8p | Forced expiratory volume in 1-second (FEV1), Best measure | family.Verrucomicrobiaceae.id.4036          | MR Egger                  | 25.75553451 | 9  | 0.002239794 |
| 98  | AXpdwL | vLGi8p | Forced expiratory volume in 1-second (FEV1), Best measure | family.Verrucomicrobiaceae.id.4036          | Inverse variance weighted | 25.77049963 | 10 | 0.004061426 |
| 99  | B5jn0Y | vLGi8p | Forced expiratory volume in 1-second (FEV1), Best measure | genus.Roseburia.id.2012                     | MR Egger                  | 24.81302133 | 11 | 0.009708731 |
| 100 | B5jn0Y | vLGi8p | Forced expiratory volume in 1-second (FEV1), Best measure | genus.Roseburia.id.2012                     | Inverse variance weighted | 27.17006369 | 12 | 0.007303059 |
| 101 | BiKMtW | vLGi8p | Forced expiratory volume in 1-second (FEV1), Best measure | genus.Sutterella.id.2896                    | MR Egger                  | 28.60689106 | 10 | 0.001442242 |
| 102 | BiKMtW | vLGi8p | Forced expiratory volume in 1-second (FEV1), Best measure | genus.Sutterella.id.2896                    | Inverse variance weighted | 28.69224885 | 11 | 0.002533235 |

|     | A       | B      | C                                                         | D                                           | E                         | F           | G  | H           |
|-----|---------|--------|-----------------------------------------------------------|---------------------------------------------|---------------------------|-------------|----|-------------|
| 103 | BLC7wV  | vLGi8p | Forced expiratory volume in 1-second (FEV1), Best measure | genus.RuminococcaceaeUCG013.id.11370        | MR Egger                  | 17.193892   | 10 | 0.07018224  |
| 104 | BLC7wV  | vLGi8p | Forced expiratory volume in 1-second (FEV1), Best measure | genus.RuminococcaceaeUCG013.id.11370        | Inverse variance weighted | 20.15862433 | 11 | 0.043212143 |
| 105 | BLSFBU  | vLGi8p | Forced expiratory volume in 1-second (FEV1), Best measure | family.Rikenellaceae.id.967                 | MR Egger                  | 34.97050077 | 17 | 0.006276923 |
| 106 | BLSFBU  | vLGi8p | Forced expiratory volume in 1-second (FEV1), Best measure | family.Rikenellaceae.id.967                 | Inverse variance weighted | 35.0273799  | 18 | 0.009377686 |
| 107 | BPW89n  | vLGi8p | Forced expiratory volume in 1-second (FEV1), Best measure | order.Verrucomicrobiales.id.4030            | MR Egger                  | 25.75422802 | 9  | 0.002240894 |
| 108 | BPW89n  | vLGi8p | Forced expiratory volume in 1-second (FEV1), Best measure | order.Verrucomicrobiales.id.4030            | Inverse variance weighted | 25.76953738 | 10 | 0.004062827 |
| 109 | BtOkEx  | vLGi8p | Forced expiratory volume in 1-second (FEV1), Best measure | genus.LachnospiraceaeNK4A136group.id.11319  | MR Egger                  | 5.422026562 | 11 | 0.909020231 |
| 110 | BtOkEx  | vLGi8p | Forced expiratory volume in 1-second (FEV1), Best measure | genus.LachnospiraceaeNK4A136group.id.11319  | Inverse variance weighted | 7.483053861 | 12 | 0.82411252  |
| 111 | Bt1upE  | vLGi8p | Forced expiratory volume in 1-second (FEV1), Best measure | family.Rhodospirillaceae.id.2717            | MR Egger                  | 19.96051915 | 12 | 0.067836503 |
| 112 | Bt1upE  | vLGi8p | Forced expiratory volume in 1-second (FEV1), Best measure | family.Rhodospirillaceae.id.2717            | Inverse variance weighted | 30.73467134 | 13 | 0.003686019 |
| 113 | C1xV1V  | vLGi8p | Forced expiratory volume in 1-second (FEV1), Best measure | order.Victivallales.id.2254                 | MR Egger                  | 15.82133983 | 6  | 0.01474572  |
| 114 | C1xV1V  | vLGi8p | Forced expiratory volume in 1-second (FEV1), Best measure | order.Victivallales.id.2254                 | Inverse variance weighted | 16.34047499 | 7  | 0.022181397 |
| 115 | c62fwk  | vLGi8p | Forced expiratory volume in 1-second (FEV1), Best measure | genus.Sellimonas.id.14369                   | MR Egger                  | 15.86672416 | 6  | 0.014487473 |
| 116 | c62fwk  | vLGi8p | Forced expiratory volume in 1-second (FEV1), Best measure | genus.Sellimonas.id.14369                   | Inverse variance weighted | 15.99653089 | 7  | 0.025148074 |
| 117 | cqFLTQ  | vLGi8p | Forced expiratory volume in 1-second (FEV1), Best measure | genus.Coproccoccus1.id.11301                | MR Egger                  | 6.840781714 | 10 | 0.74038579  |
| 118 | cqFLTQ  | vLGi8p | Forced expiratory volume in 1-second (FEV1), Best measure | genus.Coproccoccus1.id.11301                | Inverse variance weighted | 15.09340083 | 11 | 0.178260807 |
| 119 | CUTsMo  | vLGi8p | Forced expiratory volume in 1-second (FEV1), Best measure | family.ClostridialesvadinBB60group.id.11286 | MR Egger                  | 12.82643198 | 12 | 0.381781637 |
| 120 | CUTsMo  | vLGi8p | Forced expiratory volume in 1-second (FEV1), Best measure | family.ClostridialesvadinBB60group.id.11286 | Inverse variance weighted | 12.82915636 | 13 | 0.461093143 |
| 121 | CYNr8c  | vLGi8p | Forced expiratory volume in 1-second (FEV1), Best measure | order.Actinomycetales.id.420                | MR Egger                  | 2.091304712 | 3  | 0.553673881 |
| 122 | CYNr8c  | vLGi8p | Forced expiratory volume in 1-second (FEV1), Best measure | order.Actinomycetales.id.420                | Inverse variance weighted | 2.579751581 | 4  | 0.630414201 |
| 123 | d9u3Wa  | vLGi8p | Forced expiratory volume in 1-second (FEV1), Best measure | family.Lactobacillaceae.id.1836             | MR Egger                  | 10.82667155 | 6  | 0.093883362 |
| 124 | d9u3Wa  | vLGi8p | Forced expiratory volume in 1-second (FEV1), Best measure | family.Lactobacillaceae.id.1836             | Inverse variance weighted | 11.01351578 | 7  | 0.138030555 |
| 125 | dP6VTT  | vLGi8p | Forced expiratory volume in 1-second (FEV1), Best measure | class.Alphaproteobacteria.id.2379           | MR Egger                  | 4.419364011 | 5  | 0.490744198 |
| 126 | dP6VTT  | vLGi8p | Forced expiratory volume in 1-second (FEV1), Best measure | class.Alphaproteobacteria.id.2379           | Inverse variance weighted | 4.674155991 | 6  | 0.586230891 |
| 127 | dScEM7  | vLGi8p | Forced expiratory volume in 1-second (FEV1), Best measure | order.Enterobacteriales.id.3468             | MR Egger                  | 3.468343917 | 5  | 0.628182918 |
| 128 | dScEM7  | vLGi8p | Forced expiratory volume in 1-second (FEV1), Best measure | order.Enterobacteriales.id.3468             | Inverse variance weighted | 5.821250353 | 6  | 0.443508883 |
| 129 | DwGyne  | vLGi8p | Forced expiratory volume in 1-second (FEV1), Best measure | family.BacteroidalesS24.7group.id.11173     | MR Egger                  | 5.067281121 | 6  | 0.535213266 |
| 130 | DwGyne  | vLGi8p | Forced expiratory volume in 1-second (FEV1), Best measure | family.BacteroidalesS24.7group.id.11173     | Inverse variance weighted | 7.865133016 | 7  | 0.344636551 |
| 131 | E1ZDX3  | vLGi8p | Forced expiratory volume in 1-second (FEV1), Best measure | genus.Oxalobacter.id.2978                   | MR Egger                  | 11.95409768 | 9  | 0.215909449 |
| 132 | E1ZDX3  | vLGi8p | Forced expiratory volume in 1-second (FEV1), Best measure | genus.Oxalobacter.id.2978                   | Inverse variance weighted | 15.45039825 | 10 | 0.116483534 |
| 133 | e5mJnF  | vLGi8p | Forced expiratory volume in 1-second (FEV1), Best measure | genus.Dorea.id.1997                         | MR Egger                  | 14.75581211 | 8  | 0.064071109 |
| 134 | e5mJnF  | vLGi8p | Forced expiratory volume in 1-second (FEV1), Best measure | genus.Dorea.id.1997                         | Inverse variance weighted | 14.89302475 | 9  | 0.093916627 |
| 135 | ebP4zV  | vLGi8p | Forced expiratory volume in 1-second (FEV1), Best measure | genus.Ruminococcus1.id.11373                | MR Egger                  | 11.34095365 | 8  | 0.183118455 |
| 136 | ebP4zV  | vLGi8p | Forced expiratory volume in 1-second (FEV1), Best measure | genus.Ruminococcus1.id.11373                | Inverse variance weighted | 11.43946025 | 9  | 0.246784047 |
| 137 | Fcq\$NY | vLGi8p | Forced expiratory volume in 1-second (FEV1), Best measure | family.Clostridiaceae1.id.1869              | MR Egger                  | 19.68823797 | 8  | 0.011582149 |
| 138 | Fcq\$NY | vLGi8p | Forced expiratory volume in 1-second (FEV1), Best measure | family.Clostridiaceae1.id.1869              | Inverse variance weighted | 25.14102578 | 9  | 0.002819076 |
| 139 | fE3r8h  | vLGi8p | Forced expiratory volume in 1-second (FEV1), Best measure | phylum.Verrucomicrobia.id.3982              | MR Egger                  | 29.82395952 | 10 | 0.000915309 |
| 140 | fE3r8h  | vLGi8p | Forced expiratory volume in 1-second (FEV1), Best measure | phylum.Verrucomicrobia.id.3982              | Inverse variance weighted | 31.46800132 | 11 | 0.0009279   |
| 141 | FFi1Rd  | vLGi8p | Forced expiratory volume in 1-second (FEV1), Best measure | family.Actinomycetaceae.id.421              | MR Egger                  | 2.086704858 | 3  | 0.55460714  |
| 142 | FFi1Rd  | vLGi8p | Forced expiratory volume in 1-second (FEV1), Best measure | family.Actinomycetaceae.id.421              | Inverse variance weighted | 2.58454272  | 4  | 0.629563741 |
| 143 | FIVBaS  | vLGi8p | Forced expiratory volume in 1-second (FEV1), Best measure | order.Erysipelotrichales.id.2148            | MR Egger                  | 10.42499201 | 11 | 0.492611868 |
| 144 | FIVBaS  | vLGi8p | Forced expiratory volume in 1-second (FEV1), Best measure | order.Erysipelotrichales.id.2148            | Inverse variance weighted | 12.17671364 | 12 | 0.431593996 |
| 145 | Fr2Ff4  | vLGi8p | Forced expiratory volume in 1-second (FEV1), Best measure | class.Clostridia.id.1859                    | MR Egger                  | 12.54763569 | 10 | 0.250074566 |
| 146 | Fr2Ff4  | vLGi8p | Forced expiratory volume in 1-second (FEV1), Best measure | class.Clostridia.id.1859                    | Inverse variance weighted | 12.56472963 | 11 | 0.322723094 |
| 147 | FRQYhm  | vLGi8p | Forced expiratory volume in 1-second (FEV1), Best measure | class.Gammaproteobacteria.id.3303           | MR Egger                  | 3.82599042  | 5  | 0.574731282 |
| 148 | FRQYhm  | vLGi8p | Forced expiratory volume in 1-second (FEV1), Best measure | class.Gammaproteobacteria.id.3303           | Inverse variance weighted | 5.065180278 | 6  | 0.53548089  |
| 149 | FT7OrH  | vLGi8p | Forced expiratory volume in 1-second (FEV1), Best measure | genus.Actinomyces.id.423                    | MR Egger                  | 8.311067557 | 5  | 0.139904888 |
| 150 | FT7OrH  | vLGi8p | Forced expiratory volume in 1-second (FEV1), Best measure | genus.Actinomyces.id.423                    | Inverse variance weighted | 12.26547608 | 6  | 0.056301737 |
| 151 | FXBXNG  | vLGi8p | Forced expiratory volume in 1-second (FEV1), Best measure | family.FamilyXI.id.1936                     | MR Egger                  | 6.01941918  | 6  | 0.421018251 |
| 152 | FXBXNG  | vLGi8p | Forced expiratory volume in 1-second (FEV1), Best measure | family.FamilyXI.id.1936                     | Inverse variance weighted | 6.925544355 | 7  | 0.436673168 |
| 153 | gkAVOW  | vLGi8p | Forced expiratory volume in 1-second (FEV1), Best measure | phylum.Lentisphaerae.id.2238                | MR Egger                  | 16.10718627 | 7  | 0.024154931 |

|     | A      | B      | C                                                         | D                                           | E                         | F           | G  | H           |
|-----|--------|--------|-----------------------------------------------------------|---------------------------------------------|---------------------------|-------------|----|-------------|
| 154 | gkAVOW | vLGi8p | Forced expiratory volume in 1-second (FEV1), Best measure | phylum.Lentisphaerae.id.2238                | Inverse variance weighted | 16.72040437 | 8  | 0.033155802 |
| 155 | GNp2YQ | vLGi8p | Forced expiratory volume in 1-second (FEV1), Best measure | genus..Ruminococcusgavvreauiigroup.id.11342 | MR Egger                  | 36.16222773 | 10 | 7.89396E-05 |
| 156 | GNp2YQ | vLGi8p | Forced expiratory volume in 1-second (FEV1), Best measure | genus..Ruminococcusgavvreauiigroup.id.11342 | Inverse variance weighted | 36.39190953 | 11 | 0.000145622 |
| 157 | hUph1f | vLGi8p | Forced expiratory volume in 1-second (FEV1), Best measure | genus.RikenellaceaeRC9gutgroup.id.11191     | MR Egger                  | 17.07713741 | 9  | 0.047521626 |
| 158 | hUph1f | vLGi8p | Forced expiratory volume in 1-second (FEV1), Best measure | genus.RikenellaceaeRC9gutgroup.id.11191     | Inverse variance weighted | 17.25751782 | 10 | 0.068856464 |
| 159 | I2CEyx | vLGi8p | Forced expiratory volume in 1-second (FEV1), Best measure | genus.Tyzzerella3.id.11335                  | MR Egger                  | 9.592374223 | 10 | 0.47695303  |
| 160 | I2CEyx | vLGi8p | Forced expiratory volume in 1-second (FEV1), Best measure | genus.Tyzzerella3.id.11335                  | Inverse variance weighted | 13.89861035 | 11 | 0.238654657 |
| 161 | I5XXsr | vLGi8p | Forced expiratory volume in 1-second (FEV1), Best measure | genus.Prevotella9.id.11183                  | MR Egger                  | 30.56299575 | 12 | 0.002295724 |
| 162 | I5XXsr | vLGi8p | Forced expiratory volume in 1-second (FEV1), Best measure | genus.Prevotella9.id.11183                  | Inverse variance weighted | 30.79404634 | 13 | 0.003613314 |
| 163 | iAhkfC | vLGi8p | Forced expiratory volume in 1-second (FEV1), Best measure | genus.Erysipelatodostroidium.id.11381       | MR Egger                  | 8.406428594 | 13 | 0.816151726 |
| 164 | iAhkfC | vLGi8p | Forced expiratory volume in 1-second (FEV1), Best measure | genus.Erysipelatodostroidium.id.11381       | Inverse variance weighted | 8.547029326 | 14 | 0.858928536 |
| 165 | IgBtIU | vLGi8p | Forced expiratory volume in 1-second (FEV1), Best measure | class.Bacilli.id.1673                       | MR Egger                  | 13.03639833 | 15 | 0.599486442 |
| 166 | IgBtIU | vLGi8p | Forced expiratory volume in 1-second (FEV1), Best measure | class.Bacilli.id.1673                       | Inverse variance weighted | 15.51110536 | 16 | 0.487570437 |
| 167 | II0qrp | vLGi8p | Forced expiratory volume in 1-second (FEV1), Best measure | phylum.Actinobacteria.id.400                | MR Egger                  | 31.01963876 | 12 | 0.001956476 |
| 168 | II0qrp | vLGi8p | Forced expiratory volume in 1-second (FEV1), Best measure | phylum.Actinobacteria.id.400                | Inverse variance weighted | 35.43840132 | 13 | 0.000724809 |
| 169 | iMGTCd | vLGi8p | Forced expiratory volume in 1-second (FEV1), Best measure | genus.Ruminiclostridium5.id.11355           | MR Egger                  | 8.569137618 | 8  | 0.379934908 |
| 170 | iMGTCd | vLGi8p | Forced expiratory volume in 1-second (FEV1), Best measure | genus.Ruminiclostridium5.id.11355           | Inverse variance weighted | 8.919853416 | 9  | 0.444705139 |
| 171 | iwPbIH | vLGi8p | Forced expiratory volume in 1-second (FEV1), Best measure | genus.Ruminiclostridium6.id.11356           | MR Egger                  | 16.9955755  | 13 | 0.199506416 |
| 172 | iwPbIH | vLGi8p | Forced expiratory volume in 1-second (FEV1), Best measure | genus.Ruminiclostridium6.id.11356           | Inverse variance weighted | 17.42086786 | 14 | 0.234442619 |
| 173 | j0mByI | vLGi8p | Forced expiratory volume in 1-second (FEV1), Best measure | order.NB1n.id.3953                          | MR Egger                  | 16.79994331 | 11 | 0.113934073 |
| 174 | j0mByI | vLGi8p | Forced expiratory volume in 1-second (FEV1), Best measure | order.NB1n.id.3953                          | Inverse variance weighted | 16.8570746  | 12 | 0.155053246 |
| 175 | j4g0ZV | vLGi8p | Forced expiratory volume in 1-second (FEV1), Best measure | genus.CandidatusSoleaferrea.id.11350        | MR Egger                  | 11.89890839 | 7  | 0.103932716 |
| 176 | j4g0ZV | vLGi8p | Forced expiratory volume in 1-second (FEV1), Best measure | genus.CandidatusSoleaferrea.id.11350        | Inverse variance weighted | 12.64246499 | 8  | 0.124757727 |
| 177 | j87dXS | vLGi8p | Forced expiratory volume in 1-second (FEV1), Best measure | genus.Eisenbergiella.id.11304               | MR Egger                  | 11.76565172 | 9  | 0.226845483 |
| 178 | j87dXS | vLGi8p | Forced expiratory volume in 1-second (FEV1), Best measure | genus.Eisenbergiella.id.11304               | Inverse variance weighted | 11.77856181 | 10 | 0.300149923 |
| 179 | jfZByg | vLGi8p | Forced expiratory volume in 1-second (FEV1), Best measure | order.Lactobacillales.id.1800               | MR Egger                  | 12.52022879 | 12 | 0.404853869 |
| 180 | jfZByg | vLGi8p | Forced expiratory volume in 1-second (FEV1), Best measure | order.Lactobacillales.id.1800               | Inverse variance weighted | 15.00361848 | 13 | 0.307126935 |
| 181 | JHChB7 | vLGi8p | Forced expiratory volume in 1-second (FEV1), Best measure | genus.Adlercreutzia.id.812                  | MR Egger                  | 18.40299465 | 6  | 0.005300191 |
| 182 | JHChB7 | vLGi8p | Forced expiratory volume in 1-second (FEV1), Best measure | genus.Adlercreutzia.id.812                  | Inverse variance weighted | 19.36195053 | 7  | 0.007125996 |
| 183 | jHia6Z | vLGi8p | Forced expiratory volume in 1-second (FEV1), Best measure | order.Pasteurellales.id.3688                | MR Egger                  | 14.58269351 | 12 | 0.265054444 |
| 184 | jHia6Z | vLGi8p | Forced expiratory volume in 1-second (FEV1), Best measure | order.Pasteurellales.id.3688                | Inverse variance weighted | 16.08566954 | 13 | 0.244534685 |
| 185 | jJC3Fm | vLGi8p | Forced expiratory volume in 1-second (FEV1), Best measure | genus.Enterorhabdus.id.820                  | MR Egger                  | 6.167920132 | 4  | 0.186953951 |
| 186 | jJC3Fm | vLGi8p | Forced expiratory volume in 1-second (FEV1), Best measure | genus.Enterorhabdus.id.820                  | Inverse variance weighted | 6.673820098 | 5  | 0.246050585 |
| 187 | jUcEpg | vLGi8p | Forced expiratory volume in 1-second (FEV1), Best measure | genus.Butyricimonas.id.945                  | MR Egger                  | 40.35920557 | 10 | 1.4646E-05  |
| 188 | jUcEpg | vLGi8p | Forced expiratory volume in 1-second (FEV1), Best measure | genus.Butyricimonas.id.945                  | Inverse variance weighted | 43.77535296 | 11 | 7.95495E-06 |
| 189 | kjA5PB | vLGi8p | Forced expiratory volume in 1-second (FEV1), Best measure | genus.RuminococcaceaeUCG010.id.11367        | MR Egger                  | 1.931922601 | 4  | 0.74827856  |
| 190 | kjA5PB | vLGi8p | Forced expiratory volume in 1-second (FEV1), Best measure | genus.RuminococcaceaeUCG010.id.11367        | Inverse variance weighted | 1.951165467 | 5  | 0.855860139 |
| 191 | kodRd1 | vLGi8p | Forced expiratory volume in 1-second (FEV1), Best measure | family.Defluviitaleaceae.id.1924            | MR Egger                  | 7.659809802 | 9  | 0.568758826 |
| 192 | kodRd1 | vLGi8p | Forced expiratory volume in 1-second (FEV1), Best measure | family.Defluviitaleaceae.id.1924            | Inverse variance weighted | 8.060855011 | 10 | 0.622892639 |
| 193 | LCZ8yH | vLGi8p | Forced expiratory volume in 1-second (FEV1), Best measure | genus.Prevotella7.id.11182                  | MR Egger                  | 34.30339958 | 9  | 7.90186E-05 |
| 194 | LCZ8yH | vLGi8p | Forced expiratory volume in 1-second (FEV1), Best measure | genus.Prevotella7.id.11182                  | Inverse variance weighted | 34.81292199 | 10 | 0.000134383 |
| 195 | IJcl8y | vLGi8p | Forced expiratory volume in 1-second (FEV1), Best measure | genus.RuminococcaceaeUCG003.id.11361        | MR Egger                  | 27.11492644 | 10 | 0.002497488 |
| 196 | IJcl8y | vLGi8p | Forced expiratory volume in 1-second (FEV1), Best measure | genus.RuminococcaceaeUCG003.id.11361        | Inverse variance weighted | 27.29691766 | 11 | 0.004143455 |
| 197 | LKYg6S | vLGi8p | Forced expiratory volume in 1-second (FEV1), Best measure | genus.Terrisporobacter.id.11348             | MR Egger                  | 2.908925005 | 3  | 0.405881347 |
| 198 | LKYg6S | vLGi8p | Forced expiratory volume in 1-second (FEV1), Best measure | genus.Terrisporobacter.id.11348             | Inverse variance weighted | 2.909831832 | 4  | 0.573026448 |
| 199 | LRKdla | vLGi8p | Forced expiratory volume in 1-second (FEV1), Best measure | family.Bifidobacteriaceae.id.433            | MR Egger                  | 17.05103094 | 8  | 0.029582064 |
| 200 | LRKdla | vLGi8p | Forced expiratory volume in 1-second (FEV1), Best measure | family.Bifidobacteriaceae.id.433            | Inverse variance weighted | 18.00642432 | 9  | 0.035099079 |
| 201 | m0ByAU | vLGi8p | Forced expiratory volume in 1-second (FEV1), Best measure | order.Desulfovibrionales.id.3156            | MR Egger                  | 7.800289281 | 10 | 0.648337154 |
| 202 | m0ByAU | vLGi8p | Forced expiratory volume in 1-second (FEV1), Best measure | order.Desulfovibrionales.id.3156            | Inverse variance weighted | 8.6437774   | 11 | 0.654735533 |
| 203 | m9LXEq | vLGi8p | Forced expiratory volume in 1-second (FEV1), Best measure | family.Enterobacteriaceae.id.3469           | MR Egger                  | 3.468343917 | 5  | 0.628182918 |
| 204 | m9LXEq | vLGi8p | Forced expiratory volume in 1-second (FEV1), Best measure | family.Enterobacteriaceae.id.3469           | Inverse variance weighted | 5.821250353 | 6  | 0.443508883 |

|     | A      | B      | C                                                         | D                                             | E                         | F           | G  | H           |
|-----|--------|--------|-----------------------------------------------------------|-----------------------------------------------|---------------------------|-------------|----|-------------|
| 205 | MBOR7Y | vLGi8p | Forced expiratory volume in 1-second (FEV1), Best measure | family.Coriobacteriaceae.id.811               | MR Egger                  | 40.62948209 | 12 | 5.65026E-05 |
| 206 | MBOR7Y | vLGi8p | Forced expiratory volume in 1-second (FEV1), Best measure | family.Coriobacteriaceae.id.811               | Inverse variance weighted | 44.2302342  | 13 | 2.8106E-05  |
| 207 | MpL626 | vLGi8p | Forced expiratory volume in 1-second (FEV1), Best measure | genus.Lachnoclostridium.id.11308              | MR Egger                  | 21.40892877 | 11 | 0.02937365  |
| 208 | MpL626 | vLGi8p | Forced expiratory volume in 1-second (FEV1), Best measure | genus.Lachnoclostridium.id.11308              | Inverse variance weighted | 29.8316864  | 12 | 0.002959991 |
| 209 | Msb4zz | vLGi8p | Forced expiratory volume in 1-second (FEV1), Best measure | class.Melainabacteria.id.1589                 | MR Egger                  | 27.46529292 | 8  | 0.000587365 |
| 210 | Msb4zz | vLGi8p | Forced expiratory volume in 1-second (FEV1), Best measure | class.Melainabacteria.id.1589                 | Inverse variance weighted | 27.69912517 | 9  | 0.001070746 |
| 211 | MXS84H | vLGi8p | Forced expiratory volume in 1-second (FEV1), Best measure | class.Negativicutes.id.2164                   | MR Egger                  | 5.45936558  | 9  | 0.792568241 |
| 212 | MXS84H | vLGi8p | Forced expiratory volume in 1-second (FEV1), Best measure | class.Negativicutes.id.2164                   | Inverse variance weighted | 7.372994486 | 10 | 0.689824841 |
| 213 | mz9jd0 | vLGi8p | Forced expiratory volume in 1-second (FEV1), Best measure | genus.Barnesiella.id.944                      | MR Egger                  | 24.3615586  | 12 | 0.01815547  |
| 214 | mz9jd0 | vLGi8p | Forced expiratory volume in 1-second (FEV1), Best measure | genus.Barnesiella.id.944                      | Inverse variance weighted | 26.70897535 | 13 | 0.013633303 |
| 215 | n3j0op | vLGi8p | Forced expiratory volume in 1-second (FEV1), Best measure | class.Deltaproteobacteria.id.3087             | MR Egger                  | 10.09898045 | 11 | 0.521506407 |
| 216 | n3j0op | vLGi8p | Forced expiratory volume in 1-second (FEV1), Best measure | class.Deltaproteobacteria.id.3087             | Inverse variance weighted | 10.14684346 | 12 | 0.603079835 |
| 217 | nFlAu5 | vLGi8p | Forced expiratory volume in 1-second (FEV1), Best measure | family.Lachnospiraceae.id.1987                | MR Egger                  | 30.46663174 | 15 | 0.010345755 |
| 218 | nFlAu5 | vLGi8p | Forced expiratory volume in 1-second (FEV1), Best measure | family.Lachnospiraceae.id.1987                | Inverse variance weighted | 31.10364516 | 16 | 0.013051968 |
| 219 | nlesEv | vLGi8p | Forced expiratory volume in 1-second (FEV1), Best measure | genus.Peptococcus.id.2037                     | MR Egger                  | 17.01212031 | 10 | 0.074096218 |
| 220 | nlesEv | vLGi8p | Forced expiratory volume in 1-second (FEV1), Best measure | genus.Peptococcus.id.2037                     | Inverse variance weighted | 18.99513074 | 11 | 0.06118097  |
| 221 | NKNDGp | vLGi8p | Forced expiratory volume in 1-second (FEV1), Best measure | order.Methanobacteriales.id.120               | MR Egger                  | 8.302104785 | 6  | 0.216795252 |
| 222 | NKNDGp | vLGi8p | Forced expiratory volume in 1-second (FEV1), Best measure | order.Methanobacteriales.id.120               | Inverse variance weighted | 8.30644583  | 7  | 0.306348964 |
| 223 | nnD7ru | vLGi8p | Forced expiratory volume in 1-second (FEV1), Best measure | genus..Eubacteriumoxidoreducensgroup.id.11339 | MR Egger                  | 0.085553043 | 3  | 0.993512868 |
| 224 | nnD7ru | vLGi8p | Forced expiratory volume in 1-second (FEV1), Best measure | genus..Eubacteriumoxidoreducensgroup.id.11339 | Inverse variance weighted | 2.815091545 | 4  | 0.589230462 |
| 225 | NqdTjG | vLGi8p | Forced expiratory volume in 1-second (FEV1), Best measure | genus.FamilyXIIID3011group.id.11293           | MR Egger                  | 9.793679427 | 9  | 0.367444934 |
| 226 | NqdTjG | vLGi8p | Forced expiratory volume in 1-second (FEV1), Best measure | genus.FamilyXIIID3011group.id.11293           | Inverse variance weighted | 10.40508806 | 10 | 0.405700571 |
| 227 | nQHoyD | vLGi8p | Forced expiratory volume in 1-second (FEV1), Best measure | class.Lentisphaeria.id.2250                   | MR Egger                  | 15.82133983 | 6  | 0.01474572  |
| 228 | nQHoyD | vLGi8p | Forced expiratory volume in 1-second (FEV1), Best measure | class.Lentisphaeria.id.2250                   | Inverse variance weighted | 16.34047499 | 7  | 0.022181397 |
| 229 | nRNBx9 | vLGi8p | Forced expiratory volume in 1-second (FEV1), Best measure | class.Mollicutes.id.3920                      | MR Egger                  | 21.97761571 | 10 | 0.015219041 |
| 230 | nRNBx9 | vLGi8p | Forced expiratory volume in 1-second (FEV1), Best measure | class.Mollicutes.id.3920                      | Inverse variance weighted | 25.33052993 | 11 | 0.008153034 |
| 231 | O0n2Pz | vLGi8p | Forced expiratory volume in 1-second (FEV1), Best measure | family.Bacteroidaceae.id.917                  | MR Egger                  | 6.502163149 | 7  | 0.482482936 |
| 232 | O0n2Pz | vLGi8p | Forced expiratory volume in 1-second (FEV1), Best measure | family.Bacteroidaceae.id.917                  | Inverse variance weighted | 6.682407251 | 8  | 0.571253563 |
| 233 | obtxsV | vLGi8p | Forced expiratory volume in 1-second (FEV1), Best measure | family.Veillonellaceae.id.2172                | MR Egger                  | 23.62102592 | 17 | 0.130103227 |
| 234 | obtxsV | vLGi8p | Forced expiratory volume in 1-second (FEV1), Best measure | family.Veillonellaceae.id.2172                | Inverse variance weighted | 24.2481731  | 18 | 0.147064195 |
| 235 | oChqj7 | vLGi8p | Forced expiratory volume in 1-second (FEV1), Best measure | phylum.Bacteroidetes.id.905                   | MR Egger                  | 9.608442083 | 7  | 0.211869519 |
| 236 | oChqj7 | vLGi8p | Forced expiratory volume in 1-second (FEV1), Best measure | phylum.Bacteroidetes.id.905                   | Inverse variance weighted | 9.978873633 | 8  | 0.266511844 |
| 237 | oGD8An | vLGi8p | Forced expiratory volume in 1-second (FEV1), Best measure | order.Coriobacteriales.id.810                 | MR Egger                  | 40.62948209 | 12 | 5.65026E-05 |
| 238 | oGD8An | vLGi8p | Forced expiratory volume in 1-second (FEV1), Best measure | order.Coriobacteriales.id.810                 | Inverse variance weighted | 44.2302342  | 13 | 2.8106E-05  |
| 239 | OhSZ6N | vLGi8p | Forced expiratory volume in 1-second (FEV1), Best measure | genus.RuminococcaceaeUCG002.id.11360          | MR Egger                  | 28.70823317 | 18 | 0.052063555 |
| 240 | OhSZ6N | vLGi8p | Forced expiratory volume in 1-second (FEV1), Best measure | genus.RuminococcaceaeUCG002.id.11360          | Inverse variance weighted | 29.06589881 | 19 | 0.064955613 |
| 241 | olDISu | vLGi8p | Forced expiratory volume in 1-second (FEV1), Best measure | genus..Eubacteriumnodatumgroup.id.11297       | MR Egger                  | 15.30072768 | 9  | 0.082999849 |
| 242 | olDISu | vLGi8p | Forced expiratory volume in 1-second (FEV1), Best measure | genus..Eubacteriumnodatumgroup.id.11297       | Inverse variance weighted | 16.60400091 | 10 | 0.083598691 |
| 243 | OtCSo3 | vLGi8p | Forced expiratory volume in 1-second (FEV1), Best measure | genus.Alloprevotella.id.961                   | MR Egger                  | 7.602696374 | 4  | 0.107265154 |
| 244 | OtCSo3 | vLGi8p | Forced expiratory volume in 1-second (FEV1), Best measure | genus.Alloprevotella.id.961                   | Inverse variance weighted | 9.920843702 | 5  | 0.077509426 |
| 245 | oU56W6 | vLGi8p | Forced expiratory volume in 1-second (FEV1), Best measure | family.Peptostreptococcaceae.id.2042          | MR Egger                  | 27.36775505 | 11 | 0.004042144 |
| 246 | oU56W6 | vLGi8p | Forced expiratory volume in 1-second (FEV1), Best measure | family.Peptostreptococcaceae.id.2042          | Inverse variance weighted | 31.69753662 | 12 | 0.001540492 |
| 247 | Oxkiqb | vLGi8p | Forced expiratory volume in 1-second (FEV1), Best measure | order.Clostridiales.id.1863                   | MR Egger                  | 12.50720323 | 11 | 0.32674938  |
| 248 | Oxkiqb | vLGi8p | Forced expiratory volume in 1-second (FEV1), Best measure | order.Clostridiales.id.1863                   | Inverse variance weighted | 12.51814836 | 12 | 0.40501315  |
| 249 | P9709V | vLGi8p | Forced expiratory volume in 1-second (FEV1), Best measure | genus..Eubacteriumhalliigroup.id.11338        | MR Egger                  | 14.24825378 | 14 | 0.431384509 |
| 250 | P9709V | vLGi8p | Forced expiratory volume in 1-second (FEV1), Best measure | genus..Eubacteriumhalliigroup.id.11338        | Inverse variance weighted | 14.86645921 | 15 | 0.461078561 |
| 251 | PcT6eJ | vLGi8p | Forced expiratory volume in 1-second (FEV1), Best measure | phylum.Cyanobacteria.id.1500                  | MR Egger                  | 12.5302394  | 6  | 0.051132821 |
| 252 | PcT6eJ | vLGi8p | Forced expiratory volume in 1-second (FEV1), Best measure | phylum.Cyanobacteria.id.1500                  | Inverse variance weighted | 13.83266001 | 7  | 0.054238971 |
| 253 | pCXx5P | vLGi8p | Forced expiratory volume in 1-second (FEV1), Best measure | genus.Phascolarctobacterium.id.2168           | MR Egger                  | 7.612633703 | 8  | 0.472193351 |
| 254 | pCXx5P | vLGi8p | Forced expiratory volume in 1-second (FEV1), Best measure | genus.Phascolarctobacterium.id.2168           | Inverse variance weighted | 7.726372694 | 9  | 0.561939084 |
| 255 | PGIGHi | vLGi8p | Forced expiratory volume in 1-second (FEV1), Best measure | genus.LachnospiraceaeUCG008.id.11328          | MR Egger                  | 6.496727626 | 8  | 0.59177064  |

|     | A      | B      | C                                                         | D                                                 | E                         | F           | G  | H           |
|-----|--------|--------|-----------------------------------------------------------|---------------------------------------------------|---------------------------|-------------|----|-------------|
| 256 | PGIGHI | vLGi8p | Forced expiratory volume in 1-second (FEV1), Best measure | genus.LachnospiraceaeUCG008.id.11328              | Inverse variance weighted | 7.774033506 | 9  | 0.557068955 |
| 257 | pXAgfu | vLGi8p | Forced expiratory volume in 1-second (FEV1), Best measure | family.Acidaminococcaceae.id.2166                 | MR Egger                  | 27.45100602 | 5  | 4.65901E-05 |
| 258 | pXAgfu | vLGi8p | Forced expiratory volume in 1-second (FEV1), Best measure | family.Acidaminococcaceae.id.2166                 | Inverse variance weighted | 29.28155726 | 6  | 5.38083E-05 |
| 259 | q1bO5E | vLGi8p | Forced expiratory volume in 1-second (FEV1), Best measure | genus.Lactobacillus.id.1837                       | MR Egger                  | 6.744256536 | 5  | 0.240365574 |
| 260 | q1bO5E | vLGi8p | Forced expiratory volume in 1-second (FEV1), Best measure | genus.Lactobacillus.id.1837                       | Inverse variance weighted | 6.879995163 | 6  | 0.332087992 |
| 261 | Q3dvBY | vLGi8p | Forced expiratory volume in 1-second (FEV1), Best measure | genus.Methanobrevibacter.id.123                   | MR Egger                  | 4.610769029 | 3  | 0.202620204 |
| 262 | Q3dvBY | vLGi8p | Forced expiratory volume in 1-second (FEV1), Best measure | genus.Methanobrevibacter.id.123                   | Inverse variance weighted | 7.968648837 | 4  | 0.092733402 |
| 263 | Q46NVk | vLGi8p | Forced expiratory volume in 1-second (FEV1), Best measure | genus.Intestinibacter.id.11345                    | MR Egger                  | 14.53915021 | 12 | 0.267610913 |
| 264 | Q46NVk | vLGi8p | Forced expiratory volume in 1-second (FEV1), Best measure | genus.Intestinibacter.id.11345                    | Inverse variance weighted | 14.57812988 | 13 | 0.334423848 |
| 265 | qE3Gq8 | vLGi8p | Forced expiratory volume in 1-second (FEV1), Best measure | genus..Ruminococcustorquesgroup.id.14377          | MR Egger                  | 13.2000779  | 7  | 0.067381008 |
| 266 | qE3Gq8 | vLGi8p | Forced expiratory volume in 1-second (FEV1), Best measure | genus..Ruminococcustorquesgroup.id.14377          | Inverse variance weighted | 15.03934567 | 8  | 0.058384908 |
| 267 | qENAoR | vLGi8p | Forced expiratory volume in 1-second (FEV1), Best measure | genus.Victivallis.id.2256                         | MR Egger                  | 13.67457719 | 8  | 0.090651785 |
| 268 | qENAoR | vLGi8p | Forced expiratory volume in 1-second (FEV1), Best measure | genus.Victivallis.id.2256                         | Inverse variance weighted | 13.78698637 | 9  | 0.130106851 |
| 269 | QGrGNV | vLGi8p | Forced expiratory volume in 1-second (FEV1), Best measure | genus.Haemophilus.id.3698                         | MR Egger                  | 6.072440983 | 7  | 0.531316752 |
| 270 | QGrGNV | vLGi8p | Forced expiratory volume in 1-second (FEV1), Best measure | genus.Haemophilus.id.3698                         | Inverse variance weighted | 11.69212765 | 8  | 0.165478002 |
| 271 | qiWbrh | vLGi8p | Forced expiratory volume in 1-second (FEV1), Best measure | order.Selenomonadales.id.2165                     | MR Egger                  | 5.45936558  | 9  | 0.792568241 |
| 272 | qiWbrh | vLGi8p | Forced expiratory volume in 1-second (FEV1), Best measure | order.Selenomonadales.id.2165                     | Inverse variance weighted | 7.372994486 | 10 | 0.689824841 |
| 273 | QjakFr | vLGi8p | Forced expiratory volume in 1-second (FEV1), Best measure | genus.LachnospiraceaeFCS020group.id.11314         | MR Egger                  | 12.65726145 | 10 | 0.243470887 |
| 274 | QjakFr | vLGi8p | Forced expiratory volume in 1-second (FEV1), Best measure | genus.LachnospiraceaeFCS020group.id.11314         | Inverse variance weighted | 14.23105114 | 11 | 0.220471135 |
| 275 | Qyd7XB | vLGi8p | Forced expiratory volume in 1-second (FEV1), Best measure | genus..Eubacteriumxylanophilumgroup.id.14375      | MR Egger                  | 9.12919627  | 7  | 0.243512942 |
| 276 | Qyd7XB | vLGi8p | Forced expiratory volume in 1-second (FEV1), Best measure | genus..Eubacteriumxylanophilumgroup.id.14375      | Inverse variance weighted | 15.48457098 | 8  | 0.050380463 |
| 277 | R6RQXL | vLGi8p | Forced expiratory volume in 1-second (FEV1), Best measure | genus..Ruminococcusgnavusgroup.id.14376           | MR Egger                  | 26.29006989 | 9  | 0.001831173 |
| 278 | R6RQXL | vLGi8p | Forced expiratory volume in 1-second (FEV1), Best measure | genus..Ruminococcusgnavusgroup.id.14376           | Inverse variance weighted | 26.33424978 | 10 | 0.003315716 |
| 279 | R7oLoV | vLGi8p | Forced expiratory volume in 1-second (FEV1), Best measure | genus.RuminococcaceaeUCG011.id.11368              | MR Egger                  | 15.42598955 | 5  | 0.0086891   |
| 280 | R7oLoV | vLGi8p | Forced expiratory volume in 1-second (FEV1), Best measure | genus.RuminococcaceaeUCG011.id.11368              | Inverse variance weighted | 18.00955966 | 6  | 0.006208349 |
| 281 | RKITkD | vLGi8p | Forced expiratory volume in 1-second (FEV1), Best measure | genus.Bifidobacterium.id.436                      | MR Egger                  | 38.12478749 | 9  | 1.65553E-05 |
| 282 | RKITkD | vLGi8p | Forced expiratory volume in 1-second (FEV1), Best measure | genus.Bifidobacterium.id.436                      | Inverse variance weighted | 43.60097657 | 10 | 3.88169E-06 |
| 283 | rlb7o5 | vLGi8p | Forced expiratory volume in 1-second (FEV1), Best measure | genus..Eubacteriumcoprostanoligenesgroup.id.11375 | MR Egger                  | 14.63070413 | 11 | 0.200035259 |
| 284 | rlb7o5 | vLGi8p | Forced expiratory volume in 1-second (FEV1), Best measure | genus..Eubacteriumcoprostanoligenesgroup.id.11375 | Inverse variance weighted | 17.05255436 | 12 | 0.147631062 |
| 285 | RmoHnu | vLGi8p | Forced expiratory volume in 1-second (FEV1), Best measure | genus.Ruminiclostridium9.id.11357                 | MR Egger                  | 14.77627065 | 7  | 0.038976651 |
| 286 | RmoHnu | vLGi8p | Forced expiratory volume in 1-second (FEV1), Best measure | genus.Ruminiclostridium9.id.11357                 | Inverse variance weighted | 15.31893063 | 8  | 0.053232778 |
| 287 | rsbOlb | vLGi8p | Forced expiratory volume in 1-second (FEV1), Best measure | order.MollicutesRF9.id.11579                      | MR Egger                  | 18.34027162 | 11 | 0.074013579 |
| 288 | rsbOlb | vLGi8p | Forced expiratory volume in 1-second (FEV1), Best measure | order.MollicutesRF9.id.11579                      | Inverse variance weighted | 18.34934772 | 12 | 0.105487523 |
| 289 | Rv99Lm | vLGi8p | Forced expiratory volume in 1-second (FEV1), Best measure | genus..Eubacteriumbrachygroup.id.11296            | MR Egger                  | 16.68050295 | 8  | 0.033613361 |
| 290 | Rv99Lm | vLGi8p | Forced expiratory volume in 1-second (FEV1), Best measure | genus..Eubacteriumbrachygroup.id.11296            | Inverse variance weighted | 18.01094953 | 9  | 0.035046718 |
| 291 | sF7W2L | vLGi8p | Forced expiratory volume in 1-second (FEV1), Best measure | genus.Howardella.id.2000                          | MR Egger                  | 25.87544837 | 8  | 0.001103097 |
| 292 | sF7W2L | vLGi8p | Forced expiratory volume in 1-second (FEV1), Best measure | genus.Howardella.id.2000                          | Inverse variance weighted | 25.90722114 | 9  | 0.002115621 |
| 293 | sFxDb3 | vLGi8p | Forced expiratory volume in 1-second (FEV1), Best measure | order.Burkholderiales.id.2874                     | MR Egger                  | 29.73551387 | 8  | 0.00023538  |
| 294 | sFxDb3 | vLGi8p | Forced expiratory volume in 1-second (FEV1), Best measure | order.Burkholderiales.id.2874                     | Inverse variance weighted | 32.29993781 | 9  | 0.000176697 |
| 295 | Sgv0J4 | vLGi8p | Forced expiratory volume in 1-second (FEV1), Best measure | family.Victivallaceae.id.2255                     | MR Egger                  | 19.41312249 | 10 | 0.03531851  |
| 296 | Sgv0J4 | vLGi8p | Forced expiratory volume in 1-second (FEV1), Best measure | family.Victivallaceae.id.2255                     | Inverse variance weighted | 20.8417642  | 11 | 0.035047978 |
| 297 | Sp09Ka | vLGi8p | Forced expiratory volume in 1-second (FEV1), Best measure | family.Porphyromonadaceae.id.943                  | MR Egger                  | 20.71125512 | 7  | 0.004221859 |
| 298 | Sp09Ka | vLGi8p | Forced expiratory volume in 1-second (FEV1), Best measure | family.Porphyromonadaceae.id.943                  | Inverse variance weighted | 20.72531041 | 8  | 0.007914041 |
| 299 | staWrf | vLGi8p | Forced expiratory volume in 1-second (FEV1), Best measure | order.Rhodospirillales.id.2667                    | MR Egger                  | 11.3821849  | 11 | 0.411822488 |
| 300 | staWrf | vLGi8p | Forced expiratory volume in 1-second (FEV1), Best measure | order.Rhodospirillales.id.2667                    | Inverse variance weighted | 17.07647236 | 12 | 0.146743249 |
| 301 | szt6bn | vLGi8p | Forced expiratory volume in 1-second (FEV1), Best measure | class.Coriobacteriia.id.809                       | MR Egger                  | 40.62948209 | 12 | 5.65026E-05 |
| 302 | szt6bn | vLGi8p | Forced expiratory volume in 1-second (FEV1), Best measure | class.Coriobacteriia.id.809                       | Inverse variance weighted | 44.2302342  | 13 | 2.8106E-05  |
| 303 | T35lgz | vLGi8p | Forced expiratory volume in 1-second (FEV1), Best measure | family.Oxalobacteraceae.id.2966                   | MR Egger                  | 17.69167289 | 12 | 0.125378139 |
| 304 | T35lgz | vLGi8p | Forced expiratory volume in 1-second (FEV1), Best measure | family.Oxalobacteraceae.id.2966                   | Inverse variance weighted | 18.91324909 | 13 | 0.125818039 |
| 305 | T8T6Lu | vLGi8p | Forced expiratory volume in 1-second (FEV1), Best measure | family.Peptococcaceae.id.2024                     | MR Egger                  | 9.049078801 | 7  | 0.249151576 |
| 306 | T8T6Lu | vLGi8p | Forced expiratory volume in 1-second (FEV1), Best measure | family.Peptococcaceae.id.2024                     | Inverse variance weighted | 10.48917887 | 8  | 0.232355268 |

|     | A      | B      | C                                                         | D                                                         | E                         | F           | G  | H           |
|-----|--------|--------|-----------------------------------------------------------|-----------------------------------------------------------|---------------------------|-------------|----|-------------|
| 307 | tbXTaX | vLGi8p | Forced expiratory volume in 1-second (FEV1), Best measure | genus.ChristensenellaceaeR.7group.id.11283                | MR Egger                  | 18.55920615 | 8  | 0.017403322 |
| 308 | tbXTaX | vLGi8p | Forced expiratory volume in 1-second (FEV1), Best measure | genus.ChristensenellaceaeR.7group.id.11283                | Inverse variance weighted | 18.91854389 | 9  | 0.025894475 |
| 309 | TGrzdF | vLGi8p | Forced expiratory volume in 1-second (FEV1), Best measure | genus..Eubacteriumfissicatena <span>group.id.14373</span> | MR Egger                  | 13.75764916 | 6  | 0.03246368  |
| 310 | TGrzdF | vLGi8p | Forced expiratory volume in 1-second (FEV1), Best measure | genus..Eubacteriumfissicatena <span>group.id.14373</span> | Inverse variance weighted | 18.3278779  | 7  | 0.010575088 |
| 311 | tkl5vG | vLGi8p | Forced expiratory volume in 1-second (FEV1), Best measure | genus.Slackia.id.825                                      | MR Egger                  | 6.366028989 | 4  | 0.173429806 |
| 312 | tkl5vG | vLGi8p | Forced expiratory volume in 1-second (FEV1), Best measure | genus.Slackia.id.825                                      | Inverse variance weighted | 6.521404374 | 5  | 0.25873476  |
| 313 | TIODZI | vLGi8p | Forced expiratory volume in 1-second (FEV1), Best measure | genus.RuminococcaceaeUCG004.id.11362                      | MR Egger                  | 18.63425978 | 7  | 0.00941364  |
| 314 | TIODZI | vLGi8p | Forced expiratory volume in 1-second (FEV1), Best measure | genus.RuminococcaceaeUCG004.id.11362                      | Inverse variance weighted | 19.41117665 | 8  | 0.012808787 |
| 315 | TQSPiB | vLGi8p | Forced expiratory volume in 1-second (FEV1), Best measure | genus.LachnospiraceaeUCG004.id.11324                      | MR Egger                  | 32.55914261 | 9  | 0.000159325 |
| 316 | TQSPiB | vLGi8p | Forced expiratory volume in 1-second (FEV1), Best measure | genus.LachnospiraceaeUCG004.id.11324                      | Inverse variance weighted | 35.13199963 | 10 | 0.000118551 |
| 317 | tSliO9 | vLGi8p | Forced expiratory volume in 1-second (FEV1), Best measure | order.Bacteroidales.id.913                                | MR Egger                  | 15.47575755 | 9  | 0.078669598 |
| 318 | tSliO9 | vLGi8p | Forced expiratory volume in 1-second (FEV1), Best measure | order.Bacteroidales.id.913                                | Inverse variance weighted | 16.73247578 | 10 | 0.080497206 |
| 319 | TUj4LC | vLGi8p | Forced expiratory volume in 1-second (FEV1), Best measure | genus.LachnospiraceaeNC2004 <span>group.id.11316</span>   | MR Egger                  | 11.49618556 | 7  | 0.118392401 |
| 320 | TUj4LC | vLGi8p | Forced expiratory volume in 1-second (FEV1), Best measure | genus.LachnospiraceaeNC2004 <span>group.id.11316</span>   | Inverse variance weighted | 11.49823132 | 8  | 0.175034394 |
| 321 | uCOF7P | vLGi8p | Forced expiratory volume in 1-second (FEV1), Best measure | order.Bacillales.id.1674                                  | MR Egger                  | 16.28176851 | 6  | 0.012318905 |
| 322 | uCOF7P | vLGi8p | Forced expiratory volume in 1-second (FEV1), Best measure | order.Bacillales.id.1674                                  | Inverse variance weighted | 17.85361442 | 7  | 0.012648214 |
| 323 | uHEy8Q | vLGi8p | Forced expiratory volume in 1-second (FEV1), Best measure | genus.Akkermansia.id.4037                                 | MR Egger                  | 25.74750286 | 9  | 0.002246562 |
| 324 | uHEy8Q | vLGi8p | Forced expiratory volume in 1-second (FEV1), Best measure | genus.Akkermansia.id.4037                                 | Inverse variance weighted | 25.76439611 | 10 | 0.004070321 |
| 325 | uQYGEB | vLGi8p | Forced expiratory volume in 1-second (FEV1), Best measure | genus.Parabacteroides.id.954                              | MR Egger                  | 2.164009775 | 4  | 0.70562343  |
| 326 | uQYGEB | vLGi8p | Forced expiratory volume in 1-second (FEV1), Best measure | genus.Parabacteroides.id.954                              | Inverse variance weighted | 6.2945954   | 5  | 0.278599601 |
| 327 | UsMxlz | vLGi8p | Forced expiratory volume in 1-second (FEV1), Best measure | class.Verrucomicrobiae.id.4029                            | MR Egger                  | 25.75422802 | 9  | 0.002240894 |
| 328 | UsMxlz | vLGi8p | Forced expiratory volume in 1-second (FEV1), Best measure | class.Verrucomicrobiae.id.4029                            | Inverse variance weighted | 25.76953738 | 10 | 0.004062827 |
| 329 | UTPK2n | vLGi8p | Forced expiratory volume in 1-second (FEV1), Best measure | class.Bacteroidia.id.912                                  | MR Egger                  | 15.47575755 | 9  | 0.078669598 |
| 330 | UTPK2n | vLGi8p | Forced expiratory volume in 1-second (FEV1), Best measure | class.Bacteroidia.id.912                                  | Inverse variance weighted | 16.73247578 | 10 | 0.080497206 |
| 331 | UYJxH8 | vLGi8p | Forced expiratory volume in 1-second (FEV1), Best measure | genus.Butyrivibrio.id.1993                                | MR Egger                  | 32.93771593 | 13 | 0.001741058 |
| 332 | UYJxH8 | vLGi8p | Forced expiratory volume in 1-second (FEV1), Best measure | genus.Butyrivibrio.id.1993                                | Inverse variance weighted | 33.82316613 | 14 | 0.002188718 |
| 333 | Vd8Fsi | vLGi8p | Forced expiratory volume in 1-second (FEV1), Best measure | genus.Bacteroides.id.918                                  | MR Egger                  | 6.502163149 | 7  | 0.482482936 |
| 334 | Vd8Fsi | vLGi8p | Forced expiratory volume in 1-second (FEV1), Best measure | genus.Bacteroides.id.918                                  | Inverse variance weighted | 6.682407251 | 8  | 0.571253563 |
| 335 | vlyGOP | vLGi8p | Forced expiratory volume in 1-second (FEV1), Best measure | family.Ruminococcaceae.id.2050                            | MR Egger                  | 18.02344306 | 8  | 0.021051415 |
| 336 | vlyGOP | vLGi8p | Forced expiratory volume in 1-second (FEV1), Best measure | family.Ruminococcaceae.id.2050                            | Inverse variance weighted | 20.74171002 | 9  | 0.013847973 |
| 337 | W49loY | vLGi8p | Forced expiratory volume in 1-second (FEV1), Best measure | genus.Olsenella.id.822                                    | MR Egger                  | 23.06102435 | 9  | 0.00606071  |
| 338 | W49loY | vLGi8p | Forced expiratory volume in 1-second (FEV1), Best measure | genus.Olsenella.id.822                                    | Inverse variance weighted | 27.18085646 | 10 | 0.002438116 |
| 339 | w5yhuV | vLGi8p | Forced expiratory volume in 1-second (FEV1), Best measure | genus.Romboutsia.id.11347                                 | MR Egger                  | 8.977613066 | 11 | 0.623958839 |
| 340 | w5yhuV | vLGi8p | Forced expiratory volume in 1-second (FEV1), Best measure | genus.Romboutsia.id.11347                                 | Inverse variance weighted | 9.932625125 | 12 | 0.621871477 |
| 341 | WaNFee | vLGi8p | Forced expiratory volume in 1-second (FEV1), Best measure | genus.Desulfovibrio.id.3173                               | MR Egger                  | 20.76524488 | 8  | 0.007797881 |
| 342 | WaNFee | vLGi8p | Forced expiratory volume in 1-second (FEV1), Best measure | genus.Desulfovibrio.id.3173                               | Inverse variance weighted | 20.78516492 | 9  | 0.013639242 |
| 343 | WCt5pC | vLGi8p | Forced expiratory volume in 1-second (FEV1), Best measure | genus.Anaerofilum.id.2053                                 | MR Egger                  | 13.948725   | 9  | 0.124160905 |
| 344 | WCt5pC | vLGi8p | Forced expiratory volume in 1-second (FEV1), Best measure | genus.Anaerofilum.id.2053                                 | Inverse variance weighted | 21.34223112 | 10 | 0.018829599 |
| 345 | WEMGli | vLGi8p | Forced expiratory volume in 1-second (FEV1), Best measure | family.Alcaligenaceae.id.2875                             | MR Egger                  | 15.14764773 | 8  | 0.05633733  |
| 346 | WEMGli | vLGi8p | Forced expiratory volume in 1-second (FEV1), Best measure | family.Alcaligenaceae.id.2875                             | Inverse variance weighted | 15.73158176 | 9  | 0.072702885 |
| 347 | wFbl6J | vLGi8p | Forced expiratory volume in 1-second (FEV1), Best measure | genus.Marvinbryantia.id.2005                              | MR Egger                  | 16.20838598 | 8  | 0.039492749 |
| 348 | wFbl6J | vLGi8p | Forced expiratory volume in 1-second (FEV1), Best measure | genus.Marvinbryantia.id.2005                              | Inverse variance weighted | 18.35739667 | 9  | 0.031246359 |
| 349 | wIF1Yn | vLGi8p | Forced expiratory volume in 1-second (FEV1), Best measure | genus.LachnospiraceaeUCG001.id.11321                      | MR Egger                  | 17.16877552 | 11 | 0.102981424 |
| 350 | wIF1Yn | vLGi8p | Forced expiratory volume in 1-second (FEV1), Best measure | genus.LachnospiraceaeUCG001.id.11321                      | Inverse variance weighted | 17.24722739 | 12 | 0.140531722 |
| 351 | wJFco0 | vLGi8p | Forced expiratory volume in 1-second (FEV1), Best measure | genus.Veillonella.id.2198                                 | MR Egger                  | 14.09319602 | 6  | 0.028612262 |
| 352 | wJFco0 | vLGi8p | Forced expiratory volume in 1-second (FEV1), Best measure | genus.Veillonella.id.2198                                 | Inverse variance weighted | 14.69136785 | 7  | 0.040165519 |
| 353 | wn5rK2 | vLGi8p | Forced expiratory volume in 1-second (FEV1), Best measure | genus.ErysipelotrichaceaeUCG003.id.11384                  | MR Egger                  | 13.95151898 | 14 | 0.453329177 |
| 354 | wn5rK2 | vLGi8p | Forced expiratory volume in 1-second (FEV1), Best measure | genus.ErysipelotrichaceaeUCG003.id.11384                  | Inverse variance weighted | 14.00240761 | 15 | 0.525346538 |
| 355 | wQYhwp | vLGi8p | Forced expiratory volume in 1-second (FEV1), Best measure | genus.Odoribacter.id.952                                  | MR Egger                  | 13.53740557 | 5  | 0.018830887 |
| 356 | wQYhwp | vLGi8p | Forced expiratory volume in 1-second (FEV1), Best measure | genus.Odoribacter.id.952                                  | Inverse variance weighted | 14.07290178 | 6  | 0.028832328 |
| 357 | WvdQyb | vLGi8p | Forced expiratory volume in 1-second (FEV1), Best measure | genus..Eubacteriumeligens <span>group.id.14372</span>     | MR Egger                  | 4.8238169   | 5  | 0.437758178 |

|     | A       | B      | C                                                         | D                                         | E                         | F           | G  | H           |
|-----|---------|--------|-----------------------------------------------------------|-------------------------------------------|---------------------------|-------------|----|-------------|
| 358 | WvdQyb  | vLGi8p | Forced expiratory volume in 1-second (FEV1), Best measure | genus..Eubacteriumeligensgroup.id.14372   | Inverse variance weighted | 5.737649939 | 6  | 0.453210972 |
| 359 | X4kHrP  | vLGi8p | Forced expiratory volume in 1-second (FEV1), Best measure | class.Betaproteobacteria.id.2867          | MR Egger                  | 34.28316212 | 10 | 0.000165367 |
| 360 | X4kHrP  | vLGi8p | Forced expiratory volume in 1-second (FEV1), Best measure | class.Betaproteobacteria.id.2867          | Inverse variance weighted | 35.06228644 | 11 | 0.000242007 |
| 361 | xCuklr  | vLGi8p | Forced expiratory volume in 1-second (FEV1), Best measure | genus.Dialister.id.2183                   | MR Egger                  | 17.26384789 | 8  | 0.027475958 |
| 362 | xCuklr  | vLGi8p | Forced expiratory volume in 1-second (FEV1), Best measure | genus.Dialister.id.2183                   | Inverse variance weighted | 17.64721585 | 9  | 0.039494198 |
| 363 | Xtkjtja | vLGi8p | Forced expiratory volume in 1-second (FEV1), Best measure | family.Pasteurellaceae.id.3689            | MR Egger                  | 14.58269351 | 12 | 0.265054444 |
| 364 | Xtkjtja | vLGi8p | Forced expiratory volume in 1-second (FEV1), Best measure | family.Pasteurellaceae.id.3689            | Inverse variance weighted | 16.08566954 | 13 | 0.244534685 |
| 365 | XTu0EY  | vLGi8p | Forced expiratory volume in 1-second (FEV1), Best measure | genus.Intestinimonas.id.2062              | MR Egger                  | 20.90144714 | 14 | 0.104184818 |
| 366 | XTu0EY  | vLGi8p | Forced expiratory volume in 1-second (FEV1), Best measure | genus.Intestinimonas.id.2062              | Inverse variance weighted | 24.71676364 | 15 | 0.053878962 |
| 367 | XVFzMF  | vLGi8p | Forced expiratory volume in 1-second (FEV1), Best measure | genus.Holdemania.id.2157                  | MR Egger                  | 38.7500944  | 12 | 0.000115689 |
| 368 | XVFzMF  | vLGi8p | Forced expiratory volume in 1-second (FEV1), Best measure | genus.Holdemania.id.2157                  | Inverse variance weighted | 39.79278001 | 13 | 0.00014926  |
| 369 | y0FJ9U  | vLGi8p | Forced expiratory volume in 1-second (FEV1), Best measure | genus.LachnospiraceaeND3007group.id.11317 | MR Egger                  | 0.000263051 | 1  | 0.987059791 |
| 370 | y0FJ9U  | vLGi8p | Forced expiratory volume in 1-second (FEV1), Best measure | genus.LachnospiraceaeND3007group.id.11317 | Inverse variance weighted | 5.941131127 | 2  | 0.051274303 |
| 371 | Y7cF3n  | vLGi8p | Forced expiratory volume in 1-second (FEV1), Best measure | family.Methanobacteriaceae.id.121         | MR Egger                  | 8.302104785 | 6  | 0.216795252 |
| 372 | Y7cF3n  | vLGi8p | Forced expiratory volume in 1-second (FEV1), Best measure | family.Methanobacteriaceae.id.121         | Inverse variance weighted | 8.30644583  | 7  | 0.306348964 |
| 373 | yakWtY  | vLGi8p | Forced expiratory volume in 1-second (FEV1), Best measure | genus.Butyricococcus.id.2055              | MR Egger                  | 21.71677469 | 6  | 0.001362577 |
| 374 | yakWtY  | vLGi8p | Forced expiratory volume in 1-second (FEV1), Best measure | genus.Butyricococcus.id.2055              | Inverse variance weighted | 30.50775361 | 7  | 7.66079E-05 |
| 375 | yerINC  | vLGi8p | Forced expiratory volume in 1-second (FEV1), Best measure | genus.RuminococcaceaeUCG005.id.11363      | MR Egger                  | 23.38991221 | 12 | 0.024592298 |
| 376 | yerINC  | vLGi8p | Forced expiratory volume in 1-second (FEV1), Best measure | genus.RuminococcaceaeUCG005.id.11363      | Inverse variance weighted | 23.40429401 | 13 | 0.037072872 |
| 377 | yfxJv6  | vLGi8p | Forced expiratory volume in 1-second (FEV1), Best measure | family.Erysipelotrichaceae.id.2149        | MR Egger                  | 10.42499201 | 11 | 0.492611868 |
| 378 | yfxJv6  | vLGi8p | Forced expiratory volume in 1-second (FEV1), Best measure | family.Erysipelotrichaceae.id.2149        | Inverse variance weighted | 12.17671364 | 12 | 0.431593996 |
| 379 | ygbSF7  | vLGi8p | Forced expiratory volume in 1-second (FEV1), Best measure | genus.Fusicatenibacter.id.11305           | MR Egger                  | 34.96505888 | 16 | 0.004018278 |
| 380 | ygbSF7  | vLGi8p | Forced expiratory volume in 1-second (FEV1), Best measure | genus.Fusicatenibacter.id.11305           | Inverse variance weighted | 39.03385569 | 17 | 0.001767914 |
| 381 | ylev3A  | vLGi8p | Forced expiratory volume in 1-second (FEV1), Best measure | family.FamilyXIII.id.1957                 | MR Egger                  | 14.52762575 | 8  | 0.069008013 |
| 382 | ylev3A  | vLGi8p | Forced expiratory volume in 1-second (FEV1), Best measure | family.FamilyXIII.id.1957                 | Inverse variance weighted | 15.52504042 | 9  | 0.077487236 |
| 383 | yLt27i  | vLGi8p | Forced expiratory volume in 1-second (FEV1), Best measure | genus.Senegalimassilia.id.11160           | MR Egger                  | 3.486258027 | 3  | 0.322548787 |
| 384 | yLt27i  | vLGi8p | Forced expiratory volume in 1-second (FEV1), Best measure | genus.Senegalimassilia.id.11160           | Inverse variance weighted | 3.626673028 | 4  | 0.45888054  |
| 385 | YXZeGZ  | vLGi8p | Forced expiratory volume in 1-second (FEV1), Best measure | genus.Alistipes.id.968                    | MR Egger                  | 30.26859355 | 12 | 0.002543773 |
| 386 | YXZeGZ  | vLGi8p | Forced expiratory volume in 1-second (FEV1), Best measure | genus.Alistipes.id.968                    | Inverse variance weighted | 31.01727434 | 13 | 0.003352066 |
| 387 | YYHfMs  | vLGi8p | Forced expiratory volume in 1-second (FEV1), Best measure | genus.Gordonibacter.id.821                | MR Egger                  | 9.178914111 | 9  | 0.420925582 |
| 388 | YYHfMs  | vLGi8p | Forced expiratory volume in 1-second (FEV1), Best measure | genus.Gordonibacter.id.821                | Inverse variance weighted | 9.187600714 | 10 | 0.514397074 |
| 389 | zaZf8A  | vLGi8p | Forced expiratory volume in 1-second (FEV1), Best measure | genus.Oscillospira.id.2064                | MR Egger                  | 13.63186281 | 6  | 0.034029985 |
| 390 | zaZf8A  | vLGi8p | Forced expiratory volume in 1-second (FEV1), Best measure | genus.Oscillospira.id.2064                | Inverse variance weighted | 13.79466381 | 7  | 0.054956327 |
| 391 | ZJXDpG  | vLGi8p | Forced expiratory volume in 1-second (FEV1), Best measure | class.Erysipelotrichia.id.2147            | MR Egger                  | 10.42499201 | 11 | 0.492611868 |
| 392 | ZJXDpG  | vLGi8p | Forced expiratory volume in 1-second (FEV1), Best measure | class.Erysipelotrichia.id.2147            | Inverse variance weighted | 12.17671364 | 12 | 0.431593996 |
| 393 | zkWLyl  | vLGi8p | Forced expiratory volume in 1-second (FEV1), Best measure | genus.Allisonella.id.2174                 | MR Egger                  | 4.90221844  | 6  | 0.556414254 |
| 394 | zkWLyl  | vLGi8p | Forced expiratory volume in 1-second (FEV1), Best measure | genus.Allisonella.id.2174                 | Inverse variance weighted | 5.612790112 | 7  | 0.585616406 |
| 395 | 0aMbT3  | j7whIN | Forced vital capacity (FVC), Best measure                 | genus.Eggerthella.id.819                  | MR Egger                  | 24.72476023 | 9  | 0.00329122  |
| 396 | 0aMbT3  | j7whIN | Forced vital capacity (FVC), Best measure                 | genus.Eggerthella.id.819                  | Inverse variance weighted | 31.04514739 | 10 | 0.000576736 |
| 397 | 0heWA4  | j7whIN | Forced vital capacity (FVC), Best measure                 | genus.Lactococcus.id.1851                 | MR Egger                  | 8.064467505 | 7  | 0.326943585 |
| 398 | 0heWA4  | j7whIN | Forced vital capacity (FVC), Best measure                 | genus.Lactococcus.id.1851                 | Inverse variance weighted | 10.77275829 | 8  | 0.214910433 |
| 399 | 0IsDJy  | j7whIN | Forced vital capacity (FVC), Best measure                 | genus.DefluviitaleaceaeUCG011.id.11287    | MR Egger                  | 9.161244893 | 7  | 0.241285766 |
| 400 | 0IsDJy  | j7whIN | Forced vital capacity (FVC), Best measure                 | genus.DefluviitaleaceaeUCG011.id.11287    | Inverse variance weighted | 10.18161592 | 8  | 0.252509604 |
| 401 | 0ngO8p  | j7whIN | Forced vital capacity (FVC), Best measure                 | genus.Flavonifractor.id.2059              | MR Egger                  | 14.56162357 | 3  | 0.002232312 |
| 402 | 0ngO8p  | j7whIN | Forced vital capacity (FVC), Best measure                 | genus.Flavonifractor.id.2059              | Inverse variance weighted | 14.56402094 | 4  | 0.005696378 |
| 403 | 0rTnk2  | j7whIN | Forced vital capacity (FVC), Best measure                 | genus.Lachnospira.id.2004                 | MR Egger                  | 9.030557175 | 4  | 0.060340219 |
| 404 | 0rTnk2  | j7whIN | Forced vital capacity (FVC), Best measure                 | genus.Lachnospira.id.2004                 | Inverse variance weighted | 9.157744146 | 5  | 0.102935292 |
| 405 | 0rWmph  | j7whIN | Forced vital capacity (FVC), Best measure                 | phylum.Firmicutes.id.1672                 | MR Egger                  | 36.59914338 | 14 | 0.000848127 |
| 406 | 0rWmph  | j7whIN | Forced vital capacity (FVC), Best measure                 | phylum.Firmicutes.id.1672                 | Inverse variance weighted | 38.11063168 | 15 | 0.00086894  |
| 407 | 0Vfsi1  | j7whIN | Forced vital capacity (FVC), Best measure                 | genus.Hungatella.id.11306                 | MR Egger                  | 1.237475594 | 3  | 0.744030854 |
| 408 | 0Vfsi1  | j7whIN | Forced vital capacity (FVC), Best measure                 | genus.Hungatella.id.11306                 | Inverse variance weighted | 2.266991486 | 4  | 0.686785052 |

|     | A      | B      | C                                         | D                                           | E                         | F           | G  | H           |
|-----|--------|--------|-------------------------------------------|---------------------------------------------|---------------------------|-------------|----|-------------|
| 409 | 1rpkul | j7whIN | Forced vital capacity (FVC), Best measure | genus.FamilyXIIIUCG001.id.11294             | MR Egger                  | 10.89405905 | 6  | 0.091706371 |
| 410 | 1rpkul | j7whIN | Forced vital capacity (FVC), Best measure | genus.FamilyXIIIUCG001.id.11294             | Inverse variance weighted | 15.60929591 | 7  | 0.028935699 |
| 411 | 1uqUdL | j7whIN | Forced vital capacity (FVC), Best measure | genus.Escherichia.Shigella.id.3504          | MR Egger                  | 7.856949155 | 8  | 0.447567212 |
| 412 | 1uqUdL | j7whIN | Forced vital capacity (FVC), Best measure | genus.Escherichia.Shigella.id.3504          | Inverse variance weighted | 7.964362221 | 9  | 0.537741616 |
| 413 | 1zf0TZ | j7whIN | Forced vital capacity (FVC), Best measure | family.Streptococcaceae.id.1850             | MR Egger                  | 19.8290997  | 10 | 0.03091119  |
| 414 | 1zf0TZ | j7whIN | Forced vital capacity (FVC), Best measure | family.Streptococcaceae.id.1850             | Inverse variance weighted | 24.42806799 | 11 | 0.01104438  |
| 415 | 20HL0T | j7whIN | Forced vital capacity (FVC), Best measure | genus.Holdemanella.id.11393                 | MR Egger                  | 9.030409942 | 9  | 0.434471831 |
| 416 | 20HL0T | j7whIN | Forced vital capacity (FVC), Best measure | genus.Holdemanella.id.11393                 | Inverse variance weighted | 10.93477607 | 10 | 0.362622105 |
| 417 | 2GJP3o | j7whIN | Forced vital capacity (FVC), Best measure | genus.Ruminococcus2.id.11374                | MR Egger                  | 5.703229962 | 12 | 0.930296933 |
| 418 | 2GJP3o | j7whIN | Forced vital capacity (FVC), Best measure | genus.Ruminococcus2.id.11374                | Inverse variance weighted | 7.972922478 | 13 | 0.845359839 |
| 419 | 2neTKK | j7whIN | Forced vital capacity (FVC), Best measure | phylum.Euryarchaeota.id.55                  | MR Egger                  | 7.081770817 | 9  | 0.628606122 |
| 420 | 2neTKK | j7whIN | Forced vital capacity (FVC), Best measure | phylum.Euryarchaeota.id.55                  | Inverse variance weighted | 7.621739929 | 10 | 0.665730335 |
| 421 | 2vslhf | j7whIN | Forced vital capacity (FVC), Best measure | genus.Coproccoccus2.id.11302                | MR Egger                  | 8.316422209 | 6  | 0.215825777 |
| 422 | 2vslhf | j7whIN | Forced vital capacity (FVC), Best measure | genus.Coproccoccus2.id.11302                | Inverse variance weighted | 14.26829875 | 7  | 0.046610053 |
| 423 | 31r1VV | j7whIN | Forced vital capacity (FVC), Best measure | family.Christensenellaceae.id.1866          | MR Egger                  | 19.85403791 | 9  | 0.018834868 |
| 424 | 31r1VV | j7whIN | Forced vital capacity (FVC), Best measure | family.Christensenellaceae.id.1866          | Inverse variance weighted | 19.92573204 | 10 | 0.029963015 |
| 425 | 37ZEpl | j7whIN | Forced vital capacity (FVC), Best measure | genus..Eubacteriumrectalegroup.id.14374     | MR Egger                  | 9.705633791 | 6  | 0.137608373 |
| 426 | 37ZEpl | j7whIN | Forced vital capacity (FVC), Best measure | genus..Eubacteriumrectalegroup.id.14374     | Inverse variance weighted | 14.3097589  | 7  | 0.045938413 |
| 427 | 3cOJ1f | j7whIN | Forced vital capacity (FVC), Best measure | class.Actinobacteria.id.419                 | MR Egger                  | 23.79605798 | 11 | 0.013620953 |
| 428 | 3cOJ1f | j7whIN | Forced vital capacity (FVC), Best measure | class.Actinobacteria.id.419                 | Inverse variance weighted | 23.81464063 | 12 | 0.021554268 |
| 429 | 3Oo7Td | j7whIN | Forced vital capacity (FVC), Best measure | class.Methanobacteria.id.119                | MR Egger                  | 5.353815316 | 6  | 0.499298114 |
| 430 | 3Oo7Td | j7whIN | Forced vital capacity (FVC), Best measure | class.Methanobacteria.id.119                | Inverse variance weighted | 5.639246085 | 7  | 0.582445597 |
| 431 | 3tgfXE | j7whIN | Forced vital capacity (FVC), Best measure | genus.Subdoligranulum.id.2070               | MR Egger                  | 12.53548872 | 8  | 0.128862945 |
| 432 | 3tgfXE | j7whIN | Forced vital capacity (FVC), Best measure | genus.Subdoligranulum.id.2070               | Inverse variance weighted | 12.97129895 | 9  | 0.163909261 |
| 433 | 4zBtt2 | j7whIN | Forced vital capacity (FVC), Best measure | genus.Bilophila.id.3170                     | MR Egger                  | 13.25441983 | 10 | 0.209792774 |
| 434 | 4zBtt2 | j7whIN | Forced vital capacity (FVC), Best measure | genus.Bilophila.id.3170                     | Inverse variance weighted | 15.05610078 | 11 | 0.17994299  |
| 435 | 5IXuob | j7whIN | Forced vital capacity (FVC), Best measure | genus.RuminococcaceaeUCG014.id.11371        | MR Egger                  | 11.27561334 | 9  | 0.257289154 |
| 436 | 5IXuob | j7whIN | Forced vital capacity (FVC), Best measure | genus.RuminococcaceaeUCG014.id.11371        | Inverse variance weighted | 11.27741126 | 10 | 0.336317541 |
| 437 | 5qEcKL | j7whIN | Forced vital capacity (FVC), Best measure | genus.Streptococcus.id.1853                 | MR Egger                  | 24.41866653 | 12 | 0.017831009 |
| 438 | 5qEcKL | j7whIN | Forced vital capacity (FVC), Best measure | genus.Streptococcus.id.1853                 | Inverse variance weighted | 32.23884987 | 13 | 0.002213975 |
| 439 | 5TN0Z7 | j7whIN | Forced vital capacity (FVC), Best measure | genus.Oscilibacter.id.2063                  | MR Egger                  | 6.272210428 | 9  | 0.712395404 |
| 440 | 5TN0Z7 | j7whIN | Forced vital capacity (FVC), Best measure | genus.Oscilibacter.id.2063                  | Inverse variance weighted | 6.566886479 | 10 | 0.765602538 |
| 441 | 5XtLwc | j7whIN | Forced vital capacity (FVC), Best measure | genus.Catenibacterium.id.2153               | MR Egger                  | 2.22366131  | 3  | 0.527302881 |
| 442 | 5XtLwc | j7whIN | Forced vital capacity (FVC), Best measure | genus.Catenibacterium.id.2153               | Inverse variance weighted | 4.872431166 | 4  | 0.300639069 |
| 443 | 6gX3qe | j7whIN | Forced vital capacity (FVC), Best measure | phylum.Tenericutes.id.3919                  | MR Egger                  | 15.60071042 | 10 | 0.1116473   |
| 444 | 6gX3qe | j7whIN | Forced vital capacity (FVC), Best measure | phylum.Tenericutes.id.3919                  | Inverse variance weighted | 21.85158988 | 11 | 0.025548536 |
| 445 | 6jMcBB | j7whIN | Forced vital capacity (FVC), Best measure | family.Desulfovibrionaceae.id.3169          | MR Egger                  | 9.170309234 | 8  | 0.328133332 |
| 446 | 6jMcBB | j7whIN | Forced vital capacity (FVC), Best measure | family.Desulfovibrionaceae.id.3169          | Inverse variance weighted | 9.866844739 | 9  | 0.361372147 |
| 447 | 6mlWxZ | j7whIN | Forced vital capacity (FVC), Best measure | genus.Copro bacter.id.949                   | MR Egger                  | 14.2520265  | 9  | 0.113638349 |
| 448 | 6mlWxZ | j7whIN | Forced vital capacity (FVC), Best measure | genus.Copro bacter.id.949                   | Inverse variance weighted | 15.23449309 | 10 | 0.123743664 |
| 449 | 77YJKV | j7whIN | Forced vital capacity (FVC), Best measure | genus..Eubacteriumruminantiumgroup.id.11340 | MR Egger                  | 21.00936513 | 16 | 0.178150869 |
| 450 | 77YJKV | j7whIN | Forced vital capacity (FVC), Best measure | genus..Eubacteriumruminantiumgroup.id.11340 | Inverse variance weighted | 21.27325479 | 17 | 0.21430546  |
| 451 | 7aTYpg | j7whIN | Forced vital capacity (FVC), Best measure | genus.Collinsella.id.815                    | MR Egger                  | 1.285080896 | 7  | 0.98883423  |
| 452 | 7aTYpg | j7whIN | Forced vital capacity (FVC), Best measure | genus.Collinsella.id.815                    | Inverse variance weighted | 1.993718845 | 8  | 0.981203798 |
| 453 | 7dqlOH | j7whIN | Forced vital capacity (FVC), Best measure | genus..Clostridiuminnocu mgroup.id.14397    | MR Egger                  | 2.448334412 | 7  | 0.930937028 |
| 454 | 7dqlOH | j7whIN | Forced vital capacity (FVC), Best measure | genus..Clostridiuminnocu mgroup.id.14397    | Inverse variance weighted | 2.660355438 | 8  | 0.953833666 |
| 455 | 7ioeKt | j7whIN | Forced vital capacity (FVC), Best measure | phylum.Proteobacteria.id.2375               | MR Egger                  | 16.59728677 | 9  | 0.055408817 |
| 456 | 7ioeKt | j7whIN | Forced vital capacity (FVC), Best measure | phylum.Proteobacteria.id.2375               | Inverse variance weighted | 16.80141284 | 10 | 0.078875336 |
| 457 | 80h8vf | j7whIN | Forced vital capacity (FVC), Best measure | genus.Anaerostipes.id.1991                  | MR Egger                  | 16.56436237 | 10 | 0.08457666  |
| 458 | 80h8vf | j7whIN | Forced vital capacity (FVC), Best measure | genus.Anaerostipes.id.1991                  | Inverse variance weighted | 16.65466484 | 11 | 0.118513621 |
| 459 | 8jKIdu | j7whIN | Forced vital capacity (FVC), Best measure | genus.Coproccoccus3.id.11303                | MR Egger                  | 10.38867027 | 7  | 0.167596763 |

|     | A      | B      | C                                         | D                                          | E                         | F           | G  | H           |
|-----|--------|--------|-------------------------------------------|--------------------------------------------|---------------------------|-------------|----|-------------|
| 460 | 8jKldu | j7whIN | Forced vital capacity (FVC), Best measure | genus.Coproccoccus3.id.11303               | Inverse variance weighted | 11.65740909 | 8  | 0.16715639  |
| 461 | 8NULRM | j7whIN | Forced vital capacity (FVC), Best measure | genus.Paraprevotella.id.962                | MR Egger                  | 15.63938018 | 10 | 0.11043142  |
| 462 | 8NULRM | j7whIN | Forced vital capacity (FVC), Best measure | genus.Paraprevotella.id.962                | Inverse variance weighted | 15.79913644 | 11 | 0.148753204 |
| 463 | 9i4tiU | j7whIN | Forced vital capacity (FVC), Best measure | order.Gastranaerophilales.id.1591          | MR Egger                  | 16.16929994 | 7  | 0.023613828 |
| 464 | 9i4tiU | j7whIN | Forced vital capacity (FVC), Best measure | order.Gastranaerophilales.id.1591          | Inverse variance weighted | 24.2744621  | 8  | 0.00206105  |
| 465 | 9s731W | j7whIN | Forced vital capacity (FVC), Best measure | genus.RuminococcaceaeUCG009.id.11366       | MR Egger                  | 12.76881672 | 10 | 0.23688632  |
| 466 | 9s731W | j7whIN | Forced vital capacity (FVC), Best measure | genus.RuminococcaceaeUCG009.id.11366       | Inverse variance weighted | 13.99541421 | 11 | 0.233247332 |
| 467 | aclMuF | j7whIN | Forced vital capacity (FVC), Best measure | genus.Parasutterella.id.2892               | MR Egger                  | 17.94714822 | 12 | 0.117304732 |
| 468 | aclMuF | j7whIN | Forced vital capacity (FVC), Best measure | genus.Parasutterella.id.2892               | Inverse variance weighted | 19.54558984 | 13 | 0.107134514 |
| 469 | AdsBD9 | j7whIN | Forced vital capacity (FVC), Best measure | genus.Turicibacter.id.2162                 | MR Egger                  | 8.264204018 | 8  | 0.408096787 |
| 470 | AdsBD9 | j7whIN | Forced vital capacity (FVC), Best measure | genus.Turicibacter.id.2162                 | Inverse variance weighted | 8.264204953 | 9  | 0.507755735 |
| 471 | aGfu8V | j7whIN | Forced vital capacity (FVC), Best measure | order.Bifidobacteriales.id.432             | MR Egger                  | 15.4416244  | 8  | 0.051106202 |
| 472 | aGfu8V | j7whIN | Forced vital capacity (FVC), Best measure | order.Bifidobacteriales.id.432             | Inverse variance weighted | 15.7494718  | 9  | 0.072301198 |
| 473 | AK0I7A | j7whIN | Forced vital capacity (FVC), Best measure | genus.LachnospiraceaeUCG010.id.11330       | MR Egger                  | 10.47037397 | 8  | 0.23355036  |
| 474 | AK0I7A | j7whIN | Forced vital capacity (FVC), Best measure | genus.LachnospiraceaeUCG010.id.11330       | Inverse variance weighted | 12.43366758 | 9  | 0.18995018  |
| 475 | aKuChq | j7whIN | Forced vital capacity (FVC), Best measure | genus.Faecalibacterium.id.2057             | MR Egger                  | 19.23924261 | 7  | 0.007470015 |
| 476 | aKuChq | j7whIN | Forced vital capacity (FVC), Best measure | genus.Faecalibacterium.id.2057             | Inverse variance weighted | 19.3950349  | 8  | 0.012883943 |
| 477 | aKXyAu | j7whIN | Forced vital capacity (FVC), Best measure | genus.Blautia.id.1992                      | MR Egger                  | 8.475300471 | 10 | 0.582513873 |
| 478 | aKXyAu | j7whIN | Forced vital capacity (FVC), Best measure | genus.Blautia.id.1992                      | Inverse variance weighted | 9.972209361 | 11 | 0.532888669 |
| 479 | AN8qjo | j7whIN | Forced vital capacity (FVC), Best measure | genus.Clostridiumsensustricto1.id.1873     | MR Egger                  | 13.31645268 | 5  | 0.020587026 |
| 480 | AN8qjo | j7whIN | Forced vital capacity (FVC), Best measure | genus.Clostridiumsensustricto1.id.1873     | Inverse variance weighted | 14.62237567 | 6  | 0.02340614  |
| 481 | anDrA2 | j7whIN | Forced vital capacity (FVC), Best measure | genus..Eubacteriumventriosumgroup.id.11341 | MR Egger                  | 20.45316617 | 12 | 0.058984673 |
| 482 | anDrA2 | j7whIN | Forced vital capacity (FVC), Best measure | genus..Eubacteriumventriosumgroup.id.11341 | Inverse variance weighted | 22.39019448 | 13 | 0.049603125 |
| 483 | ASQ2fp | j7whIN | Forced vital capacity (FVC), Best measure | genus.RuminococcaceaeNK4A214group.id.11358 | MR Egger                  | 19.81392641 | 11 | 0.047958757 |
| 484 | ASQ2fp | j7whIN | Forced vital capacity (FVC), Best measure | genus.RuminococcaceaeNK4A214group.id.11358 | Inverse variance weighted | 22.8020336  | 12 | 0.029454409 |
| 485 | aToCrK | j7whIN | Forced vital capacity (FVC), Best measure | genus.Anaerotruncus.id.2054                | MR Egger                  | 31.31140068 | 11 | 0.000982814 |
| 486 | aToCrK | j7whIN | Forced vital capacity (FVC), Best measure | genus.Anaerotruncus.id.2054                | Inverse variance weighted | 32.29897451 | 12 | 0.001244098 |
| 487 | axDRMS | j7whIN | Forced vital capacity (FVC), Best measure | family.Prevotellaceae.id.960               | MR Egger                  | 12.51321675 | 13 | 0.486074584 |
| 488 | axDRMS | j7whIN | Forced vital capacity (FVC), Best measure | family.Prevotellaceae.id.960               | Inverse variance weighted | 13.73897212 | 14 | 0.469333503 |
| 489 | AXpdwL | j7whIN | Forced vital capacity (FVC), Best measure | family.Verrucomicrobiaceae.id.4036         | MR Egger                  | 25.64893943 | 9  | 0.00233125  |
| 490 | AXpdwL | j7whIN | Forced vital capacity (FVC), Best measure | family.Verrucomicrobiaceae.id.4036         | Inverse variance weighted | 26.7989     | 10 | 0.002802023 |
| 491 | B5jn0Y | j7whIN | Forced vital capacity (FVC), Best measure | genus.Roseburia.id.2012                    | MR Egger                  | 18.10397685 | 11 | 0.079199129 |
| 492 | B5jn0Y | j7whIN | Forced vital capacity (FVC), Best measure | genus.Roseburia.id.2012                    | Inverse variance weighted | 19.71049682 | 12 | 0.072764422 |
| 493 | BiKmtW | j7whIN | Forced vital capacity (FVC), Best measure | genus.Sutterella.id.2896                   | MR Egger                  | 35.17187644 | 10 | 0.000116706 |
| 494 | BiKmtW | j7whIN | Forced vital capacity (FVC), Best measure | genus.Sutterella.id.2896                   | Inverse variance weighted | 35.73744721 | 11 | 0.000187113 |
| 495 | BLC7wV | j7whIN | Forced vital capacity (FVC), Best measure | genus.RuminococcaceaeUCG013.id.11370       | MR Egger                  | 35.54168675 | 10 | 0.000100885 |
| 496 | BLC7wV | j7whIN | Forced vital capacity (FVC), Best measure | genus.RuminococcaceaeUCG013.id.11370       | Inverse variance weighted | 38.6502359  | 11 | 6.07328E-05 |
| 497 | BLSFBU | j7whIN | Forced vital capacity (FVC), Best measure | family.Rikenellaceae.id.967                | MR Egger                  | 11.34583118 | 17 | 0.838031673 |
| 498 | BLSFBU | j7whIN | Forced vital capacity (FVC), Best measure | family.Rikenellaceae.id.967                | Inverse variance weighted | 13.52723728 | 18 | 0.759349106 |
| 499 | BPW89n | j7whIN | Forced vital capacity (FVC), Best measure | order.Verrucomicrobiales.id.4030           | MR Egger                  | 25.63742794 | 9  | 0.00234134  |
| 500 | BPW89n | j7whIN | Forced vital capacity (FVC), Best measure | order.Verrucomicrobiales.id.4030           | Inverse variance weighted | 26.79554851 | 10 | 0.002805438 |
| 501 | BtOkEx | j7whIN | Forced vital capacity (FVC), Best measure | genus.LachnospiraceaeNK4A136group.id.11319 | MR Egger                  | 8.444261427 | 11 | 0.673041042 |
| 502 | BtOkEx | j7whIN | Forced vital capacity (FVC), Best measure | genus.LachnospiraceaeNK4A136group.id.11319 | Inverse variance weighted | 12.26796455 | 12 | 0.424406185 |
| 503 | Bt1upE | j7whIN | Forced vital capacity (FVC), Best measure | family.Rhodospirillaceae.id.2717           | MR Egger                  | 20.31391742 | 12 | 0.061375879 |
| 504 | Bt1upE | j7whIN | Forced vital capacity (FVC), Best measure | family.Rhodospirillaceae.id.2717           | Inverse variance weighted | 22.81556026 | 13 | 0.043943644 |
| 505 | C1xV1V | j7whIN | Forced vital capacity (FVC), Best measure | order.Victivallales.id.2254                | MR Egger                  | 11.04967882 | 6  | 0.08685313  |
| 506 | C1xV1V | j7whIN | Forced vital capacity (FVC), Best measure | order.Victivallales.id.2254                | Inverse variance weighted | 11.7559494  | 7  | 0.108875673 |
| 507 | c62fwk | j7whIN | Forced vital capacity (FVC), Best measure | genus.Sellimonas.id.14369                  | MR Egger                  | 13.73095755 | 6  | 0.03279024  |
| 508 | c62fwk | j7whIN | Forced vital capacity (FVC), Best measure | genus.Sellimonas.id.14369                  | Inverse variance weighted | 13.73372024 | 7  | 0.056125216 |
| 509 | cqFLTQ | j7whIN | Forced vital capacity (FVC), Best measure | genus.Coproccoccus1.id.11301               | MR Egger                  | 5.905195818 | 10 | 0.823164365 |
| 510 | cqFLTQ | j7whIN | Forced vital capacity (FVC), Best measure | genus.Coproccoccus1.id.11301               | Inverse variance weighted | 10.39446511 | 11 | 0.495292233 |

|     | A      | B      | C                                         | D                                           | E                         | F           | G  | H           |
|-----|--------|--------|-------------------------------------------|---------------------------------------------|---------------------------|-------------|----|-------------|
| 511 | CUTsMo | j7whIN | Forced vital capacity (FVC), Best measure | family.ClostridialesvadinBB60group.id.11286 | MR Egger                  | 16.91889821 | 12 | 0.152673643 |
| 512 | CUTsMo | j7whIN | Forced vital capacity (FVC), Best measure | family.ClostridialesvadinBB60group.id.11286 | Inverse variance weighted | 17.51470628 | 13 | 0.176829814 |
| 513 | CYNr8c | j7whIN | Forced vital capacity (FVC), Best measure | order.Actinomycetales.id.420                | MR Egger                  | 1.695712282 | 3  | 0.637887474 |
| 514 | CYNr8c | j7whIN | Forced vital capacity (FVC), Best measure | order.Actinomycetales.id.420                | Inverse variance weighted | 1.836349204 | 4  | 0.765825765 |
| 515 | d9u3Wa | j7whIN | Forced vital capacity (FVC), Best measure | family.Lactobacillaceae.id.1836             | MR Egger                  | 14.87226946 | 6  | 0.021273778 |
| 516 | d9u3Wa | j7whIN | Forced vital capacity (FVC), Best measure | family.Lactobacillaceae.id.1836             | Inverse variance weighted | 14.9580079  | 7  | 0.036541465 |
| 517 | dP6VTT | j7whIN | Forced vital capacity (FVC), Best measure | class.Alphaproteobacteria.id.2379           | MR Egger                  | 3.730671389 | 5  | 0.588806293 |
| 518 | dP6VTT | j7whIN | Forced vital capacity (FVC), Best measure | class.Alphaproteobacteria.id.2379           | Inverse variance weighted | 3.939081952 | 6  | 0.684920135 |
| 519 | dSCeM7 | j7whIN | Forced vital capacity (FVC), Best measure | order.Enterobacteriales.id.3468             | MR Egger                  | 4.145666098 | 5  | 0.528640059 |
| 520 | dSCeM7 | j7whIN | Forced vital capacity (FVC), Best measure | order.Enterobacteriales.id.3468             | Inverse variance weighted | 6.617477753 | 6  | 0.357674469 |
| 521 | DwGyne | j7whIN | Forced vital capacity (FVC), Best measure | family.BacteroidalesS24.7group.id.11173     | MR Egger                  | 2.731797745 | 6  | 0.841677228 |
| 522 | DwGyne | j7whIN | Forced vital capacity (FVC), Best measure | family.BacteroidalesS24.7group.id.11173     | Inverse variance weighted | 4.786198424 | 7  | 0.686035599 |
| 523 | E1ZDX3 | j7whIN | Forced vital capacity (FVC), Best measure | genus.Oxalobacter.id.2978                   | MR Egger                  | 16.91037098 | 9  | 0.050138198 |
| 524 | E1ZDX3 | j7whIN | Forced vital capacity (FVC), Best measure | genus.Oxalobacter.id.2978                   | Inverse variance weighted | 21.40581704 | 10 | 0.018434923 |
| 525 | e5mJnF | j7whIN | Forced vital capacity (FVC), Best measure | genus.Dorea.id.1997                         | MR Egger                  | 12.25625826 | 8  | 0.140131275 |
| 526 | e5mJnF | j7whIN | Forced vital capacity (FVC), Best measure | genus.Dorea.id.1997                         | Inverse variance weighted | 12.64042826 | 9  | 0.179562768 |
| 527 | ebP4zV | j7whIN | Forced vital capacity (FVC), Best measure | genus.Ruminococcus1.id.11373                | MR Egger                  | 11.22944822 | 8  | 0.1890342   |
| 528 | ebP4zV | j7whIN | Forced vital capacity (FVC), Best measure | genus.Ruminococcus1.id.11373                | Inverse variance weighted | 11.22946993 | 9  | 0.260307365 |
| 529 | FcqSNY | j7whIN | Forced vital capacity (FVC), Best measure | family.Clostridiaceae1.id.1869              | MR Egger                  | 23.0198805  | 8  | 0.003338816 |
| 530 | FcqSNY | j7whIN | Forced vital capacity (FVC), Best measure | family.Clostridiaceae1.id.1869              | Inverse variance weighted | 29.62284993 | 9  | 0.00050846  |
| 531 | fE3r8h | j7whIN | Forced vital capacity (FVC), Best measure | phylum.Verrucomicrobia.id.3982              | MR Egger                  | 33.33605163 | 10 | 0.00023913  |
| 532 | fE3r8h | j7whIN | Forced vital capacity (FVC), Best measure | phylum.Verrucomicrobia.id.3982              | Inverse variance weighted | 36.53596745 | 11 | 0.00013778  |
| 533 | FFi1Rd | j7whIN | Forced vital capacity (FVC), Best measure | family.Actinomycetaceae.id.421              | MR Egger                  | 1.696452289 | 3  | 0.637722821 |
| 534 | FFi1Rd | j7whIN | Forced vital capacity (FVC), Best measure | family.Actinomycetaceae.id.421              | Inverse variance weighted | 1.841325776 | 4  | 0.764913512 |
| 535 | FIVBaS | j7whIN | Forced vital capacity (FVC), Best measure | order.Erysipelotrichales.id.2148            | MR Egger                  | 8.653896405 | 11 | 0.653804737 |
| 536 | FIVBaS | j7whIN | Forced vital capacity (FVC), Best measure | order.Erysipelotrichales.id.2148            | Inverse variance weighted | 10.16781928 | 12 | 0.601240677 |
| 537 | Fr2Ff4 | j7whIN | Forced vital capacity (FVC), Best measure | class.Clostridia.id.1859                    | MR Egger                  | 18.78610388 | 10 | 0.043065118 |
| 538 | Fr2Ff4 | j7whIN | Forced vital capacity (FVC), Best measure | class.Clostridia.id.1859                    | Inverse variance weighted | 18.80668944 | 11 | 0.064652989 |
| 539 | FRQYhm | j7whIN | Forced vital capacity (FVC), Best measure | class.Gammaproteobacteria.id.3303           | MR Egger                  | 3.547492385 | 5  | 0.616213927 |
| 540 | FRQYhm | j7whIN | Forced vital capacity (FVC), Best measure | class.Gammaproteobacteria.id.3303           | Inverse variance weighted | 7.51462226  | 6  | 0.275861543 |
| 541 | FT7OrH | j7whIN | Forced vital capacity (FVC), Best measure | genus.Actinomyces.id.423                    | MR Egger                  | 9.232107586 | 5  | 0.100156683 |
| 542 | FT7OrH | j7whIN | Forced vital capacity (FVC), Best measure | genus.Actinomyces.id.423                    | Inverse variance weighted | 12.53331932 | 6  | 0.051075382 |
| 543 | FXBXNG | j7whIN | Forced vital capacity (FVC), Best measure | family.FamilyXI.id.1936                     | MR Egger                  | 4.216415388 | 6  | 0.647415584 |
| 544 | FXBXNG | j7whIN | Forced vital capacity (FVC), Best measure | family.FamilyXI.id.1936                     | Inverse variance weighted | 6.422122859 | 7  | 0.491412431 |
| 545 | gkAVOW | j7whIN | Forced vital capacity (FVC), Best measure | phylum.Lentisphaerae.id.2238                | MR Egger                  | 11.05855375 | 7  | 0.136085249 |
| 546 | gkAVOW | j7whIN | Forced vital capacity (FVC), Best measure | phylum.Lentisphaerae.id.2238                | Inverse variance weighted | 11.82516997 | 8  | 0.159176488 |
| 547 | GNp2YQ | j7whIN | Forced vital capacity (FVC), Best measure | genus..Ruminococcusgavvreauiigroup.id.11342 | MR Egger                  | 38.34649252 | 10 | 3.30258E-05 |
| 548 | GNp2YQ | j7whIN | Forced vital capacity (FVC), Best measure | genus..Ruminococcusgavvreauiigroup.id.11342 | Inverse variance weighted | 38.34920044 | 11 | 6.82973E-05 |
| 549 | hUph1f | j7whIN | Forced vital capacity (FVC), Best measure | genus.RikenellaceaeRC9gutgroup.id.11191     | MR Egger                  | 18.65511389 | 9  | 0.028290417 |
| 550 | hUph1f | j7whIN | Forced vital capacity (FVC), Best measure | genus.RikenellaceaeRC9gutgroup.id.11191     | Inverse variance weighted | 19.82836172 | 10 | 0.030918537 |
| 551 | I2CEyx | j7whIN | Forced vital capacity (FVC), Best measure | genus.TyzzereIIa3.id.11335                  | MR Egger                  | 7.00675425  | 10 | 0.724807157 |
| 552 | I2CEyx | j7whIN | Forced vital capacity (FVC), Best measure | genus.TyzzereIIa3.id.11335                  | Inverse variance weighted | 9.313072895 | 11 | 0.593018623 |
| 553 | I5XXsr | j7whIN | Forced vital capacity (FVC), Best measure | genus.Prevotella9.id.11183                  | MR Egger                  | 45.40593954 | 12 | 8.77857E-06 |
| 554 | I5XXsr | j7whIN | Forced vital capacity (FVC), Best measure | genus.Prevotella9.id.11183                  | Inverse variance weighted | 45.40707363 | 13 | 1.78949E-05 |
| 555 | iAhkfC | j7whIN | Forced vital capacity (FVC), Best measure | genus.Erysipelatodostroidium.id.11381       | MR Egger                  | 9.224914253 | 13 | 0.755752503 |
| 556 | iAhkfC | j7whIN | Forced vital capacity (FVC), Best measure | genus.Erysipelatodostroidium.id.11381       | Inverse variance weighted | 9.657747817 | 14 | 0.786753608 |
| 557 | IgBtIU | j7whIN | Forced vital capacity (FVC), Best measure | class.Bacilli.id.1673                       | MR Egger                  | 21.72107356 | 15 | 0.11532898  |
| 558 | IgBtIU | j7whIN | Forced vital capacity (FVC), Best measure | class.Bacilli.id.1673                       | Inverse variance weighted | 22.49907075 | 16 | 0.127795668 |
| 559 | II0qrp | j7whIN | Forced vital capacity (FVC), Best measure | phylum.Actinobacteria.id.400                | MR Egger                  | 23.14962524 | 12 | 0.026482197 |
| 560 | II0qrp | j7whIN | Forced vital capacity (FVC), Best measure | phylum.Actinobacteria.id.400                | Inverse variance weighted | 29.1210164  | 13 | 0.006292001 |
| 561 | iMGTCd | j7whIN | Forced vital capacity (FVC), Best measure | genus.Ruminidostroidium5.id.11355           | MR Egger                  | 6.766098257 | 8  | 0.562066458 |

|     | A      | B      | C                                         | D                                    | E                         | F           | G  | H           |
|-----|--------|--------|-------------------------------------------|--------------------------------------|---------------------------|-------------|----|-------------|
| 562 | iMGTCd | j7whIN | Forced vital capacity (FVC), Best measure | genus.Ruminiclostridium5.id.11355    | Inverse variance weighted | 6.766138355 | 9  | 0.661452915 |
| 563 | iwPbIH | j7whIN | Forced vital capacity (FVC), Best measure | genus.Ruminiclostridium6.id.11356    | MR Egger                  | 16.95807151 | 13 | 0.201227902 |
| 564 | iwPbIH | j7whIN | Forced vital capacity (FVC), Best measure | genus.Ruminiclostridium6.id.11356    | Inverse variance weighted | 17.49416235 | 14 | 0.230798668 |
| 565 | j0mByI | j7whIN | Forced vital capacity (FVC), Best measure | order.NB1n.id.3953                   | MR Egger                  | 22.71378913 | 11 | 0.019391274 |
| 566 | j0mByI | j7whIN | Forced vital capacity (FVC), Best measure | order.NB1n.id.3953                   | Inverse variance weighted | 24.93772386 | 12 | 0.015120754 |
| 567 | j4g0ZV | j7whIN | Forced vital capacity (FVC), Best measure | genus.CandidatusSoleaferrea.id.11350 | MR Egger                  | 28.04610865 | 7  | 0.000215702 |
| 568 | j4g0ZV | j7whIN | Forced vital capacity (FVC), Best measure | genus.CandidatusSoleaferrea.id.11350 | Inverse variance weighted | 28.11207933 | 8  | 0.0004534   |
| 569 | j87dXS | j7whIN | Forced vital capacity (FVC), Best measure | genus.Eisenbergiella.id.11304        | MR Egger                  | 15.02566689 | 9  | 0.09023336  |
| 570 | j87dXS | j7whIN | Forced vital capacity (FVC), Best measure | genus.Eisenbergiella.id.11304        | Inverse variance weighted | 15.14190807 | 10 | 0.126973161 |
| 571 | jfZByg | j7whIN | Forced vital capacity (FVC), Best measure | order.Lactobacillales.id.1800        | MR Egger                  | 16.32770253 | 12 | 0.176683464 |
| 572 | jfZByg | j7whIN | Forced vital capacity (FVC), Best measure | order.Lactobacillales.id.1800        | Inverse variance weighted | 16.53956439 | 13 | 0.221216065 |
| 573 | JHChB7 | j7whIN | Forced vital capacity (FVC), Best measure | genus.Adlercreutzia.id.812           | MR Egger                  | 23.33130238 | 6  | 0.000692781 |
| 574 | JHChB7 | j7whIN | Forced vital capacity (FVC), Best measure | genus.Adlercreutzia.id.812           | Inverse variance weighted | 26.11617098 | 7  | 0.000480152 |
| 575 | jHia6Z | j7whIN | Forced vital capacity (FVC), Best measure | order.Pasteurellales.id.3688         | MR Egger                  | 22.54556893 | 12 | 0.031841209 |
| 576 | jHia6Z | j7whIN | Forced vital capacity (FVC), Best measure | order.Pasteurellales.id.3688         | Inverse variance weighted | 23.11908234 | 13 | 0.04026923  |
| 577 | jJC3Fm | j7whIN | Forced vital capacity (FVC), Best measure | genus.Enterorhabdus.id.820           | MR Egger                  | 12.6591671  | 4  | 0.013067006 |
| 578 | jJC3Fm | j7whIN | Forced vital capacity (FVC), Best measure | genus.Enterorhabdus.id.820           | Inverse variance weighted | 14.49066376 | 5  | 0.012775458 |
| 579 | jUcEpg | j7whIN | Forced vital capacity (FVC), Best measure | genus.Butyricimonas.id.945           | MR Egger                  | 33.38033937 | 10 | 0.000235056 |
| 580 | jUcEpg | j7whIN | Forced vital capacity (FVC), Best measure | genus.Butyricimonas.id.945           | Inverse variance weighted | 42.35817877 | 11 | 1.40404E-05 |
| 581 | kjA5PB | j7whIN | Forced vital capacity (FVC), Best measure | genus.RuminococcaceaeUCG010.id.11367 | MR Egger                  | 0.454010617 | 4  | 0.97782084  |
| 582 | kjA5PB | j7whIN | Forced vital capacity (FVC), Best measure | genus.RuminococcaceaeUCG010.id.11367 | Inverse variance weighted | 0.564934195 | 5  | 0.989552402 |
| 583 | kodRd1 | j7whIN | Forced vital capacity (FVC), Best measure | family.Defluviitaleaceae.id.1924     | MR Egger                  | 8.388879259 | 9  | 0.495480607 |
| 584 | kodRd1 | j7whIN | Forced vital capacity (FVC), Best measure | family.Defluviitaleaceae.id.1924     | Inverse variance weighted | 9.363997073 | 10 | 0.497942144 |
| 585 | LCZ8yH | j7whIN | Forced vital capacity (FVC), Best measure | genus.Prevotella7.id.11182           | MR Egger                  | 23.0347445  | 9  | 0.006118756 |
| 586 | LCZ8yH | j7whIN | Forced vital capacity (FVC), Best measure | genus.Prevotella7.id.11182           | Inverse variance weighted | 23.70968412 | 10 | 0.008409413 |
| 587 | lJcl8y | j7whIN | Forced vital capacity (FVC), Best measure | genus.RuminococcaceaeUCG003.id.11361 | MR Egger                  | 21.37177168 | 10 | 0.018645265 |
| 588 | lJcl8y | j7whIN | Forced vital capacity (FVC), Best measure | genus.RuminococcaceaeUCG003.id.11361 | Inverse variance weighted | 21.69404051 | 11 | 0.026853619 |
| 589 | LKYg6S | j7whIN | Forced vital capacity (FVC), Best measure | genus.Terrisporobacter.id.11348      | MR Egger                  | 4.22422521  | 3  | 0.238247646 |
| 590 | LKYg6S | j7whIN | Forced vital capacity (FVC), Best measure | genus.Terrisporobacter.id.11348      | Inverse variance weighted | 4.610868366 | 4  | 0.329603011 |
| 591 | LRKdla | j7whIN | Forced vital capacity (FVC), Best measure | family.Bifidobacteriaceae.id.433     | MR Egger                  | 15.4416244  | 8  | 0.051106202 |
| 592 | LRKdla | j7whIN | Forced vital capacity (FVC), Best measure | family.Bifidobacteriaceae.id.433     | Inverse variance weighted | 15.7494718  | 9  | 0.072301198 |
| 593 | m0ByAU | j7whIN | Forced vital capacity (FVC), Best measure | order.Desulfovibrionales.id.3156     | MR Egger                  | 10.81130212 | 10 | 0.372407153 |
| 594 | m0ByAU | j7whIN | Forced vital capacity (FVC), Best measure | order.Desulfovibrionales.id.3156     | Inverse variance weighted | 11.89679191 | 11 | 0.37145088  |
| 595 | m9LXEq | j7whIN | Forced vital capacity (FVC), Best measure | family.Enterobacteriaceae.id.3469    | MR Egger                  | 4.145666098 | 5  | 0.528640059 |
| 596 | m9LXEq | j7whIN | Forced vital capacity (FVC), Best measure | family.Enterobacteriaceae.id.3469    | Inverse variance weighted | 6.617477753 | 6  | 0.357674469 |
| 597 | MBOR7Y | j7whIN | Forced vital capacity (FVC), Best measure | family.Coriobacteriaceae.id.811      | MR Egger                  | 30.5660117  | 12 | 0.002293308 |
| 598 | MBOR7Y | j7whIN | Forced vital capacity (FVC), Best measure | family.Coriobacteriaceae.id.811      | Inverse variance weighted | 34.85002466 | 13 | 0.000892759 |
| 599 | MpL626 | j7whIN | Forced vital capacity (FVC), Best measure | genus.Lachnoclostridium.id.11308     | MR Egger                  | 19.07746114 | 11 | 0.059717151 |
| 600 | MpL626 | j7whIN | Forced vital capacity (FVC), Best measure | genus.Lachnoclostridium.id.11308     | Inverse variance weighted | 30.98793694 | 12 | 0.001978374 |
| 601 | Msb4zz | j7whIN | Forced vital capacity (FVC), Best measure | class.Melainabacteria.id.1589        | MR Egger                  | 19.24576782 | 8  | 0.013599121 |
| 602 | Msb4zz | j7whIN | Forced vital capacity (FVC), Best measure | class.Melainabacteria.id.1589        | Inverse variance weighted | 19.90354174 | 9  | 0.018517104 |
| 603 | MXS84H | j7whIN | Forced vital capacity (FVC), Best measure | class.Negativicutes.id.2164          | MR Egger                  | 6.224393077 | 9  | 0.717266966 |
| 604 | MXS84H | j7whIN | Forced vital capacity (FVC), Best measure | class.Negativicutes.id.2164          | Inverse variance weighted | 7.773000824 | 10 | 0.65099892  |
| 605 | mz9jd0 | j7whIN | Forced vital capacity (FVC), Best measure | genus.Barnesiella.id.944             | MR Egger                  | 28.20146719 | 12 | 0.005168548 |
| 606 | mz9jd0 | j7whIN | Forced vital capacity (FVC), Best measure | genus.Barnesiella.id.944             | Inverse variance weighted | 32.19555929 | 13 | 0.002247019 |
| 607 | n3j0op | j7whIN | Forced vital capacity (FVC), Best measure | class.Deltaproteobacteria.id.3087    | MR Egger                  | 11.20928591 | 11 | 0.425900287 |
| 608 | n3j0op | j7whIN | Forced vital capacity (FVC), Best measure | class.Deltaproteobacteria.id.3087    | Inverse variance weighted | 11.54844121 | 12 | 0.482591189 |
| 609 | nFIAu5 | j7whIN | Forced vital capacity (FVC), Best measure | family.Lachnospiraceae.id.1987       | MR Egger                  | 37.77911675 | 15 | 0.000972626 |
| 610 | nFIAu5 | j7whIN | Forced vital capacity (FVC), Best measure | family.Lachnospiraceae.id.1987       | Inverse variance weighted | 37.94784146 | 16 | 0.001539472 |
| 611 | nlesEv | j7whIN | Forced vital capacity (FVC), Best measure | genus.Peptococcus.id.2037            | MR Egger                  | 11.51115174 | 10 | 0.319103803 |
| 612 | nlesEv | j7whIN | Forced vital capacity (FVC), Best measure | genus.Peptococcus.id.2037            | Inverse variance weighted | 11.79108306 | 11 | 0.379550043 |

|     | A      | B      | C                                         | D                                             | E                         | F           | G  | H           |
|-----|--------|--------|-------------------------------------------|-----------------------------------------------|---------------------------|-------------|----|-------------|
| 613 | NKNDGp | j7whIN | Forced vital capacity (FVC), Best measure | order.Methanobacteriales.id.120               | MR Egger                  | 5.353815316 | 6  | 0.499298114 |
| 614 | NKNDGp | j7whIN | Forced vital capacity (FVC), Best measure | order.Methanobacteriales.id.120               | Inverse variance weighted | 5.639246085 | 7  | 0.582445597 |
| 615 | nnD7ru | j7whIN | Forced vital capacity (FVC), Best measure | genus..Eubacteriumoxidoreducensgroup.id.11339 | MR Egger                  | 0.435539625 | 3  | 0.932806836 |
| 616 | nnD7ru | j7whIN | Forced vital capacity (FVC), Best measure | genus..Eubacteriumoxidoreducensgroup.id.11339 | Inverse variance weighted | 5.096910172 | 4  | 0.277497664 |
| 617 | NqdTjG | j7whIN | Forced vital capacity (FVC), Best measure | genus.FamilyXIIID3011group.id.11293           | MR Egger                  | 6.678713488 | 9  | 0.670529656 |
| 618 | NqdTjG | j7whIN | Forced vital capacity (FVC), Best measure | genus.FamilyXIIID3011group.id.11293           | Inverse variance weighted | 6.942671472 | 10 | 0.73084581  |
| 619 | nQHoYD | j7whIN | Forced vital capacity (FVC), Best measure | class.Lentisphaeria.id.2250                   | MR Egger                  | 11.04967882 | 6  | 0.08685313  |
| 620 | nQHoYD | j7whIN | Forced vital capacity (FVC), Best measure | class.Lentisphaeria.id.2250                   | Inverse variance weighted | 11.7559494  | 7  | 0.108875673 |
| 621 | nRNBx9 | j7whIN | Forced vital capacity (FVC), Best measure | class.Mollicutes.id.3920                      | MR Egger                  | 15.60071042 | 10 | 0.1116473   |
| 622 | nRNBx9 | j7whIN | Forced vital capacity (FVC), Best measure | class.Mollicutes.id.3920                      | Inverse variance weighted | 21.85158988 | 11 | 0.025548536 |
| 623 | O0n2Pz | j7whIN | Forced vital capacity (FVC), Best measure | family.Bacteroidaceae.id.917                  | MR Egger                  | 6.21039899  | 7  | 0.51540839  |
| 624 | O0n2Pz | j7whIN | Forced vital capacity (FVC), Best measure | family.Bacteroidaceae.id.917                  | Inverse variance weighted | 6.977793413 | 8  | 0.539030486 |
| 625 | obtxsV | j7whIN | Forced vital capacity (FVC), Best measure | family.Veillonellaceae.id.2172                | MR Egger                  | 24.51747702 | 17 | 0.106042824 |
| 626 | obtxsV | j7whIN | Forced vital capacity (FVC), Best measure | family.Veillonellaceae.id.2172                | Inverse variance weighted | 24.60068395 | 18 | 0.136316466 |
| 627 | oChqj7 | j7whIN | Forced vital capacity (FVC), Best measure | phylum.Bacteroidetes.id.905                   | MR Egger                  | 11.95926212 | 7  | 0.10190654  |
| 628 | oChqj7 | j7whIN | Forced vital capacity (FVC), Best measure | phylum.Bacteroidetes.id.905                   | Inverse variance weighted | 12.6395257  | 8  | 0.124868992 |
| 629 | oGD8An | j7whIN | Forced vital capacity (FVC), Best measure | order.Coriobacteriales.id.810                 | MR Egger                  | 30.5660117  | 12 | 0.002293308 |
| 630 | oGD8An | j7whIN | Forced vital capacity (FVC), Best measure | order.Coriobacteriales.id.810                 | Inverse variance weighted | 34.85002466 | 13 | 0.000892759 |
| 631 | OhSZ6N | j7whIN | Forced vital capacity (FVC), Best measure | genus.RuminococcaceaeUCG002.id.11360          | MR Egger                  | 16.8933295  | 18 | 0.530450195 |
| 632 | OhSZ6N | j7whIN | Forced vital capacity (FVC), Best measure | genus.RuminococcaceaeUCG002.id.11360          | Inverse variance weighted | 18.05710719 | 19 | 0.518626667 |
| 633 | olDISu | j7whIN | Forced vital capacity (FVC), Best measure | genus..Eubacteriumnodatumgroup.id.11297       | MR Egger                  | 19.6007754  | 9  | 0.020542503 |
| 634 | olDISu | j7whIN | Forced vital capacity (FVC), Best measure | genus..Eubacteriumnodatumgroup.id.11297       | Inverse variance weighted | 22.91649917 | 10 | 0.011059026 |
| 635 | OtCSo3 | j7whIN | Forced vital capacity (FVC), Best measure | genus.Alloprevotella.id.961                   | MR Egger                  | 9.994009125 | 4  | 0.040528718 |
| 636 | OtCSo3 | j7whIN | Forced vital capacity (FVC), Best measure | genus.Alloprevotella.id.961                   | Inverse variance weighted | 12.06880433 | 5  | 0.033857068 |
| 637 | oU56W6 | j7whIN | Forced vital capacity (FVC), Best measure | family.Peptostreptococcaceae.id.2042          | MR Egger                  | 26.51449019 | 11 | 0.005437291 |
| 638 | oU56W6 | j7whIN | Forced vital capacity (FVC), Best measure | family.Peptostreptococcaceae.id.2042          | Inverse variance weighted | 35.99041352 | 12 | 0.000325145 |
| 639 | Oxkiqb | j7whIN | Forced vital capacity (FVC), Best measure | order.Clostridiales.id.1863                   | MR Egger                  | 16.60244676 | 11 | 0.120197463 |
| 640 | Oxkiqb | j7whIN | Forced vital capacity (FVC), Best measure | order.Clostridiales.id.1863                   | Inverse variance weighted | 16.60715566 | 12 | 0.164981779 |
| 641 | P9709V | j7whIN | Forced vital capacity (FVC), Best measure | genus..Eubacteriumhalliigroup.id.11338        | MR Egger                  | 13.7008445  | 14 | 0.472227935 |
| 642 | P9709V | j7whIN | Forced vital capacity (FVC), Best measure | genus..Eubacteriumhalliigroup.id.11338        | Inverse variance weighted | 13.85044505 | 15 | 0.536900693 |
| 643 | PcT6eJ | j7whIN | Forced vital capacity (FVC), Best measure | phylum.Cyanobacteria.id.1500                  | MR Egger                  | 12.84627918 | 6  | 0.04554304  |
| 644 | PcT6eJ | j7whIN | Forced vital capacity (FVC), Best measure | phylum.Cyanobacteria.id.1500                  | Inverse variance weighted | 14.23248907 | 7  | 0.047197481 |
| 645 | pCXx5P | j7whIN | Forced vital capacity (FVC), Best measure | genus.Phascolarctobacterium.id.2168           | MR Egger                  | 6.646610832 | 8  | 0.575195335 |
| 646 | pCXx5P | j7whIN | Forced vital capacity (FVC), Best measure | genus.Phascolarctobacterium.id.2168           | Inverse variance weighted | 7.337336569 | 9  | 0.602042412 |
| 647 | PGIGHi | j7whIN | Forced vital capacity (FVC), Best measure | genus.LachnospiraceaeUCG008.id.11328          | MR Egger                  | 5.775145941 | 8  | 0.672402229 |
| 648 | PGIGHi | j7whIN | Forced vital capacity (FVC), Best measure | genus.LachnospiraceaeUCG008.id.11328          | Inverse variance weighted | 6.218690439 | 9  | 0.717846994 |
| 649 | pXAgfu | j7whIN | Forced vital capacity (FVC), Best measure | family.Acidaminococcaceae.id.2166             | MR Egger                  | 21.90379728 | 5  | 0.000546111 |
| 650 | pXAgfu | j7whIN | Forced vital capacity (FVC), Best measure | family.Acidaminococcaceae.id.2166             | Inverse variance weighted | 24.43425234 | 6  | 0.000434403 |
| 651 | q1b05E | j7whIN | Forced vital capacity (FVC), Best measure | genus.Lactobacillus.id.1837                   | MR Egger                  | 9.526862294 | 5  | 0.089806601 |
| 652 | q1b05E | j7whIN | Forced vital capacity (FVC), Best measure | genus.Lactobacillus.id.1837                   | Inverse variance weighted | 9.543886128 | 6  | 0.14522106  |
| 653 | Q3dvBY | j7whIN | Forced vital capacity (FVC), Best measure | genus.Methanobrevibacter.id.123               | MR Egger                  | 3.496362182 | 3  | 0.32123424  |
| 654 | Q3dvBY | j7whIN | Forced vital capacity (FVC), Best measure | genus.Methanobrevibacter.id.123               | Inverse variance weighted | 6.04629953  | 4  | 0.195717175 |
| 655 | Q46NVk | j7whIN | Forced vital capacity (FVC), Best measure | genus.Intestinibacter.id.11345                | MR Egger                  | 15.31143112 | 12 | 0.224845405 |
| 656 | Q46NVk | j7whIN | Forced vital capacity (FVC), Best measure | genus.Intestinibacter.id.11345                | Inverse variance weighted | 15.41526725 | 13 | 0.282150364 |
| 657 | qE3Gq8 | j7whIN | Forced vital capacity (FVC), Best measure | genus..Ruminococcustorquesgroup.id.14377      | MR Egger                  | 5.174266866 | 7  | 0.638706012 |
| 658 | qE3Gq8 | j7whIN | Forced vital capacity (FVC), Best measure | genus..Ruminococcustorquesgroup.id.14377      | Inverse variance weighted | 6.264402414 | 8  | 0.617641408 |
| 659 | qENaOR | j7whIN | Forced vital capacity (FVC), Best measure | genus.Victivallis.id.2256                     | MR Egger                  | 14.05335758 | 8  | 0.080385228 |
| 660 | qENaOR | j7whIN | Forced vital capacity (FVC), Best measure | genus.Victivallis.id.2256                     | Inverse variance weighted | 14.66539363 | 9  | 0.10054668  |
| 661 | QGrGNV | j7whIN | Forced vital capacity (FVC), Best measure | genus.Haemophilus.id.3698                     | MR Egger                  | 7.22459355  | 7  | 0.405876028 |
| 662 | QGrGNV | j7whIN | Forced vital capacity (FVC), Best measure | genus.Haemophilus.id.3698                     | Inverse variance weighted | 14.17729306 | 8  | 0.077259783 |
| 663 | qiWbrh | j7whIN | Forced vital capacity (FVC), Best measure | order.Selenomonadales.id.2165                 | MR Egger                  | 6.224393077 | 9  | 0.717266966 |

|     | A      | B      | C                                         | D                                                 | E                         | F           | G  | H           |
|-----|--------|--------|-------------------------------------------|---------------------------------------------------|---------------------------|-------------|----|-------------|
| 664 | qiWbrh | j7whIN | Forced vital capacity (FVC), Best measure | order.Selenomonadales.id.2165                     | Inverse variance weighted | 7.773000824 | 10 | 0.65099892  |
| 665 | QjakFr | j7whIN | Forced vital capacity (FVC), Best measure | genus.LachnospiraceaeFCS020group.id.11314         | MR Egger                  | 18.93548935 | 10 | 0.041089758 |
| 666 | QjakFr | j7whIN | Forced vital capacity (FVC), Best measure | genus.LachnospiraceaeFCS020group.id.11314         | Inverse variance weighted | 19.25501097 | 11 | 0.056666784 |
| 667 | Qyd7XB | j7whIN | Forced vital capacity (FVC), Best measure | genus..Eubacteriumxylanophilumgroup.id.14375      | MR Egger                  | 10.96584541 | 7  | 0.140115782 |
| 668 | Qyd7XB | j7whIN | Forced vital capacity (FVC), Best measure | genus..Eubacteriumxylanophilumgroup.id.14375      | Inverse variance weighted | 24.93592526 | 8  | 0.001593899 |
| 669 | R6RQXL | j7whIN | Forced vital capacity (FVC), Best measure | genus..Ruminococcusgnavusgroup.id.14376           | MR Egger                  | 26.33161432 | 9  | 0.001802638 |
| 670 | R6RQXL | j7whIN | Forced vital capacity (FVC), Best measure | genus..Ruminococcusgnavusgroup.id.14376           | Inverse variance weighted | 26.99515199 | 10 | 0.002608943 |
| 671 | R7oLoV | j7whIN | Forced vital capacity (FVC), Best measure | genus.RuminococcaceaeUCG011.id.11368              | MR Egger                  | 13.65171755 | 5  | 0.017979865 |
| 672 | R7oLoV | j7whIN | Forced vital capacity (FVC), Best measure | genus.RuminococcaceaeUCG011.id.11368              | Inverse variance weighted | 18.12992441 | 6  | 0.005915579 |
| 673 | RKITkD | j7whIN | Forced vital capacity (FVC), Best measure | genus.Bifidobacterium.id.436                      | MR Egger                  | 27.87666528 | 9  | 0.001000192 |
| 674 | RKITkD | j7whIN | Forced vital capacity (FVC), Best measure | genus.Bifidobacterium.id.436                      | Inverse variance weighted | 32.48181297 | 10 | 0.00033272  |
| 675 | rlb7o5 | j7whIN | Forced vital capacity (FVC), Best measure | genus..Eubacteriumcoprostanoligenesgroup.id.11375 | MR Egger                  | 13.61438317 | 11 | 0.255070106 |
| 676 | rlb7o5 | j7whIN | Forced vital capacity (FVC), Best measure | genus..Eubacteriumcoprostanoligenesgroup.id.11375 | Inverse variance weighted | 15.38737614 | 12 | 0.22093235  |
| 677 | RmoHnu | j7whIN | Forced vital capacity (FVC), Best measure | genus.Ruminiclostridium9.id.11357                 | MR Egger                  | 16.46847119 | 7  | 0.02116452  |
| 678 | RmoHnu | j7whIN | Forced vital capacity (FVC), Best measure | genus.Ruminiclostridium9.id.11357                 | Inverse variance weighted | 19.09344456 | 8  | 0.014367815 |
| 679 | rsbOlB | j7whIN | Forced vital capacity (FVC), Best measure | order.MollicutesRF9.id.11579                      | MR Egger                  | 21.34444317 | 11 | 0.02997315  |
| 680 | rsbOlB | j7whIN | Forced vital capacity (FVC), Best measure | order.MollicutesRF9.id.11579                      | Inverse variance weighted | 21.62917188 | 12 | 0.04189227  |
| 681 | Rv99Lm | j7whIN | Forced vital capacity (FVC), Best measure | genus..Eubacteriumbrachygroup.id.11296            | MR Egger                  | 18.89645117 | 8  | 0.015423345 |
| 682 | Rv99Lm | j7whIN | Forced vital capacity (FVC), Best measure | genus..Eubacteriumbrachygroup.id.11296            | Inverse variance weighted | 19.61038247 | 9  | 0.020475152 |
| 683 | sF7W2L | j7whIN | Forced vital capacity (FVC), Best measure | genus.Howardella.id.2000                          | MR Egger                  | 25.8268948  | 8  | 0.001124372 |
| 684 | sF7W2L | j7whIN | Forced vital capacity (FVC), Best measure | genus.Howardella.id.2000                          | Inverse variance weighted | 26.00619443 | 9  | 0.002038227 |
| 685 | sFxDb3 | j7whIN | Forced vital capacity (FVC), Best measure | order.Burkholderiales.id.2874                     | MR Egger                  | 23.51212072 | 8  | 0.002765357 |
| 686 | sFxDb3 | j7whIN | Forced vital capacity (FVC), Best measure | order.Burkholderiales.id.2874                     | Inverse variance weighted | 25.20333747 | 9  | 0.002754294 |
| 687 | Sgv0J4 | j7whIN | Forced vital capacity (FVC), Best measure | family.Victivallaceae.id.2255                     | MR Egger                  | 16.65801946 | 10 | 0.082282009 |
| 688 | Sgv0J4 | j7whIN | Forced vital capacity (FVC), Best measure | family.Victivallaceae.id.2255                     | Inverse variance weighted | 19.43634319 | 11 | 0.053696788 |
| 689 | Sp09Ka | j7whIN | Forced vital capacity (FVC), Best measure | family.Porphyromonadaceae.id.943                  | MR Egger                  | 11.28847308 | 7  | 0.126521572 |
| 690 | Sp09Ka | j7whIN | Forced vital capacity (FVC), Best measure | family.Porphyromonadaceae.id.943                  | Inverse variance weighted | 11.66342705 | 8  | 0.166864451 |
| 691 | staWrf | j7whIN | Forced vital capacity (FVC), Best measure | order.Rhodospirillales.id.2667                    | MR Egger                  | 13.51542312 | 11 | 0.260975281 |
| 692 | staWrf | j7whIN | Forced vital capacity (FVC), Best measure | order.Rhodospirillales.id.2667                    | Inverse variance weighted | 15.46547788 | 12 | 0.216962069 |
| 693 | szt6bn | j7whIN | Forced vital capacity (FVC), Best measure | class.Coriobacteriia.id.809                       | MR Egger                  | 30.5660117  | 12 | 0.002293308 |
| 694 | szt6bn | j7whIN | Forced vital capacity (FVC), Best measure | class.Coriobacteriia.id.809                       | Inverse variance weighted | 34.85002466 | 13 | 0.000892759 |
| 695 | T35lgz | j7whIN | Forced vital capacity (FVC), Best measure | family.Oxalobacteraceae.id.2966                   | MR Egger                  | 20.33482482 | 12 | 0.061011424 |
| 696 | T35lgz | j7whIN | Forced vital capacity (FVC), Best measure | family.Oxalobacteraceae.id.2966                   | Inverse variance weighted | 20.69969217 | 13 | 0.079084671 |
| 697 | T8T6Lu | j7whIN | Forced vital capacity (FVC), Best measure | family.Peptococcaceae.id.2024                     | MR Egger                  | 7.302845541 | 7  | 0.398043307 |
| 698 | T8T6Lu | j7whIN | Forced vital capacity (FVC), Best measure | family.Peptococcaceae.id.2024                     | Inverse variance weighted | 7.929926616 | 8  | 0.440344928 |
| 699 | tbXTaX | j7whIN | Forced vital capacity (FVC), Best measure | genus.ChristensenellaceaeR.7group.id.11283        | MR Egger                  | 10.1202279  | 8  | 0.256688726 |
| 700 | tbXTaX | j7whIN | Forced vital capacity (FVC), Best measure | genus.ChristensenellaceaeR.7group.id.11283        | Inverse variance weighted | 10.59720301 | 9  | 0.304331559 |
| 701 | TGrzdF | j7whIN | Forced vital capacity (FVC), Best measure | genus..Eubacteriumfissicatenagroup.id.14373       | MR Egger                  | 17.15903545 | 6  | 0.008716197 |
| 702 | TGrzdF | j7whIN | Forced vital capacity (FVC), Best measure | genus..Eubacteriumfissicatenagroup.id.14373       | Inverse variance weighted | 21.46468772 | 7  | 0.003139949 |
| 703 | tkl5vG | j7whIN | Forced vital capacity (FVC), Best measure | genus.Slackia.id.825                              | MR Egger                  | 3.822443838 | 4  | 0.430568426 |
| 704 | tkl5vG | j7whIN | Forced vital capacity (FVC), Best measure | genus.Slackia.id.825                              | Inverse variance weighted | 3.888941586 | 5  | 0.565514033 |
| 705 | TIODZI | j7whIN | Forced vital capacity (FVC), Best measure | genus.RuminococcaceaeUCG004.id.11362              | MR Egger                  | 17.72153071 | 7  | 0.013291606 |
| 706 | TIODZI | j7whIN | Forced vital capacity (FVC), Best measure | genus.RuminococcaceaeUCG004.id.11362              | Inverse variance weighted | 20.99586178 | 8  | 0.007158431 |
| 707 | TQSpIB | j7whIN | Forced vital capacity (FVC), Best measure | genus.LachnospiraceaeUCG004.id.11324              | MR Egger                  | 27.9224491  | 9  | 0.000982745 |
| 708 | TQSpIB | j7whIN | Forced vital capacity (FVC), Best measure | genus.LachnospiraceaeUCG004.id.11324              | Inverse variance weighted | 29.84500138 | 10 | 0.000908096 |
| 709 | tSlIO9 | j7whIN | Forced vital capacity (FVC), Best measure | order.Bacteroidales.id.913                        | MR Egger                  | 16.46107759 | 9  | 0.057855424 |
| 710 | tSlIO9 | j7whIN | Forced vital capacity (FVC), Best measure | order.Bacteroidales.id.913                        | Inverse variance weighted | 17.20174578 | 10 | 0.070017366 |
| 711 | TUj4LC | j7whIN | Forced vital capacity (FVC), Best measure | genus.LachnospiraceaeNC2004group.id.11316         | MR Egger                  | 14.20628775 | 7  | 0.047631636 |
| 712 | TUj4LC | j7whIN | Forced vital capacity (FVC), Best measure | genus.LachnospiraceaeNC2004group.id.11316         | Inverse variance weighted | 14.23502085 | 8  | 0.07584164  |
| 713 | uCOF7P | j7whIN | Forced vital capacity (FVC), Best measure | order.Bacillales.id.1674                          | MR Egger                  | 13.89351464 | 6  | 0.030848549 |
| 714 | uCOF7P | j7whIN | Forced vital capacity (FVC), Best measure | order.Bacillales.id.1674                          | Inverse variance weighted | 14.20121491 | 7  | 0.047716119 |

|     | A      | B      | C                                         | D                                         | E                         | F           | G  | H           |
|-----|--------|--------|-------------------------------------------|-------------------------------------------|---------------------------|-------------|----|-------------|
| 715 | uHEy8Q | j7whIN | Forced vital capacity (FVC), Best measure | genus.Akkermansia.id.4037                 | MR Egger                  | 25.61738298 | 9  | 0.002359012 |
| 716 | uHEy8Q | j7whIN | Forced vital capacity (FVC), Best measure | genus.Akkermansia.id.4037                 | Inverse variance weighted | 26.78798006 | 10 | 0.002813162 |
| 717 | uQYGEB | j7whIN | Forced vital capacity (FVC), Best measure | genus.Parabacteroides.id.954              | MR Egger                  | 1.852987121 | 4  | 0.762775123 |
| 718 | uQYGEB | j7whIN | Forced vital capacity (FVC), Best measure | genus.Parabacteroides.id.954              | Inverse variance weighted | 10.28711095 | 5  | 0.06749701  |
| 719 | UsMxlz | j7whIN | Forced vital capacity (FVC), Best measure | class.Verrucomicrobiae.id.4029            | MR Egger                  | 25.63742794 | 9  | 0.00234134  |
| 720 | UsMxlz | j7whIN | Forced vital capacity (FVC), Best measure | class.Verrucomicrobiae.id.4029            | Inverse variance weighted | 26.79554851 | 10 | 0.002805438 |
| 721 | UTPK2n | j7whIN | Forced vital capacity (FVC), Best measure | class.Bacteroidia.id.912                  | MR Egger                  | 16.46107759 | 9  | 0.057855424 |
| 722 | UTPK2n | j7whIN | Forced vital capacity (FVC), Best measure | class.Bacteroidia.id.912                  | Inverse variance weighted | 17.20174578 | 10 | 0.070017366 |
| 723 | UYJxH8 | j7whIN | Forced vital capacity (FVC), Best measure | genus.Butyrivibrio.id.1993                | MR Egger                  | 26.29549766 | 13 | 0.015512379 |
| 724 | UYJxH8 | j7whIN | Forced vital capacity (FVC), Best measure | genus.Butyrivibrio.id.1993                | Inverse variance weighted | 28.11095653 | 14 | 0.013753061 |
| 725 | Vd8Fsi | j7whIN | Forced vital capacity (FVC), Best measure | genus.Bacteroides.id.918                  | MR Egger                  | 6.21039899  | 7  | 0.51540839  |
| 726 | Vd8Fsi | j7whIN | Forced vital capacity (FVC), Best measure | genus.Bacteroides.id.918                  | Inverse variance weighted | 6.977793413 | 8  | 0.539030486 |
| 727 | vlyGOP | j7whIN | Forced vital capacity (FVC), Best measure | family.Ruminococcaceae.id.2050            | MR Egger                  | 15.31579692 | 8  | 0.053288141 |
| 728 | vlyGOP | j7whIN | Forced vital capacity (FVC), Best measure | family.Ruminococcaceae.id.2050            | Inverse variance weighted | 17.22872134 | 9  | 0.045252398 |
| 729 | W49loY | j7whIN | Forced vital capacity (FVC), Best measure | genus.Olsenella.id.822                    | MR Egger                  | 24.82101075 | 9  | 0.003175689 |
| 730 | W49loY | j7whIN | Forced vital capacity (FVC), Best measure | genus.Olsenella.id.822                    | Inverse variance weighted | 25.85762355 | 10 | 0.003936467 |
| 731 | w5yhuV | j7whIN | Forced vital capacity (FVC), Best measure | genus.Romboutsia.id.11347                 | MR Egger                  | 9.593850234 | 11 | 0.567247397 |
| 732 | w5yhuV | j7whIN | Forced vital capacity (FVC), Best measure | genus.Romboutsia.id.11347                 | Inverse variance weighted | 12.19553614 | 12 | 0.430106483 |
| 733 | WaNFee | j7whIN | Forced vital capacity (FVC), Best measure | genus.Desulfovibrio.id.3173               | MR Egger                  | 19.30636937 | 8  | 0.013304319 |
| 734 | WaNFee | j7whIN | Forced vital capacity (FVC), Best measure | genus.Desulfovibrio.id.3173               | Inverse variance weighted | 19.41876523 | 9  | 0.021858522 |
| 735 | WCt5pC | j7whIN | Forced vital capacity (FVC), Best measure | genus.Anaerofilum.id.2053                 | MR Egger                  | 10.7883926  | 9  | 0.290492943 |
| 736 | WCt5pC | j7whIN | Forced vital capacity (FVC), Best measure | genus.Anaerofilum.id.2053                 | Inverse variance weighted | 21.58902962 | 10 | 0.017340744 |
| 737 | WEMGli | j7whIN | Forced vital capacity (FVC), Best measure | family.Alcaligenaceae.id.2875             | MR Egger                  | 13.46528542 | 8  | 0.09681191  |
| 738 | WEMGli | j7whIN | Forced vital capacity (FVC), Best measure | family.Alcaligenaceae.id.2875             | Inverse variance weighted | 17.25510739 | 9  | 0.044867708 |
| 739 | wFbL6J | j7whIN | Forced vital capacity (FVC), Best measure | genus.Marvinbryantia.id.2005              | MR Egger                  | 13.10267882 | 8  | 0.108365251 |
| 740 | wFbL6J | j7whIN | Forced vital capacity (FVC), Best measure | genus.Marvinbryantia.id.2005              | Inverse variance weighted | 14.61045598 | 9  | 0.102206982 |
| 741 | wIF1Yn | j7whIN | Forced vital capacity (FVC), Best measure | genus.LachnospiraceaeUCG001.id.11321      | MR Egger                  | 22.39994244 | 11 | 0.021451592 |
| 742 | wIF1Yn | j7whIN | Forced vital capacity (FVC), Best measure | genus.LachnospiraceaeUCG001.id.11321      | Inverse variance weighted | 22.43047683 | 12 | 0.032969041 |
| 743 | wJFco0 | j7whIN | Forced vital capacity (FVC), Best measure | genus.Veillonella.id.2198                 | MR Egger                  | 18.54304196 | 6  | 0.005009174 |
| 744 | wJFco0 | j7whIN | Forced vital capacity (FVC), Best measure | genus.Veillonella.id.2198                 | Inverse variance weighted | 18.57481913 | 7  | 0.009628934 |
| 745 | wn5rK2 | j7whIN | Forced vital capacity (FVC), Best measure | genus.ErysipelotrichaceaeUCG003.id.11384  | MR Egger                  | 18.13503553 | 14 | 0.200699656 |
| 746 | wn5rK2 | j7whIN | Forced vital capacity (FVC), Best measure | genus.ErysipelotrichaceaeUCG003.id.11384  | Inverse variance weighted | 18.78861726 | 15 | 0.223473037 |
| 747 | wQYhwp | j7whIN | Forced vital capacity (FVC), Best measure | genus.Odoribacter.id.952                  | MR Egger                  | 16.98004088 | 5  | 0.004537806 |
| 748 | wQYhwp | j7whIN | Forced vital capacity (FVC), Best measure | genus.Odoribacter.id.952                  | Inverse variance weighted | 18.59704641 | 6  | 0.004901153 |
| 749 | WvdQyb | j7whIN | Forced vital capacity (FVC), Best measure | genus..Eubacteriumeligensgroup.id.14372   | MR Egger                  | 2.024528857 | 5  | 0.845740698 |
| 750 | WvdQyb | j7whIN | Forced vital capacity (FVC), Best measure | genus..Eubacteriumeligensgroup.id.14372   | Inverse variance weighted | 5.353448322 | 6  | 0.499343332 |
| 751 | X4kHrP | j7whIN | Forced vital capacity (FVC), Best measure | class.Betaproteobacteria.id.2867          | MR Egger                  | 25.24049518 | 10 | 0.004907819 |
| 752 | X4kHrP | j7whIN | Forced vital capacity (FVC), Best measure | class.Betaproteobacteria.id.2867          | Inverse variance weighted | 25.92639498 | 11 | 0.006655559 |
| 753 | xCuklr | j7whIN | Forced vital capacity (FVC), Best measure | genus.Dialister.id.2183                   | MR Egger                  | 12.28233685 | 8  | 0.139044278 |
| 754 | xCuklr | j7whIN | Forced vital capacity (FVC), Best measure | genus.Dialister.id.2183                   | Inverse variance weighted | 12.73202782 | 9  | 0.175111304 |
| 755 | Xtkcja | j7whIN | Forced vital capacity (FVC), Best measure | family.Pasteurellaceae.id.3689            | MR Egger                  | 22.54556893 | 12 | 0.031841209 |
| 756 | Xtkcja | j7whIN | Forced vital capacity (FVC), Best measure | family.Pasteurellaceae.id.3689            | Inverse variance weighted | 23.11908234 | 13 | 0.04026923  |
| 757 | XTu0EY | j7whIN | Forced vital capacity (FVC), Best measure | genus.Intestinimonas.id.2062              | MR Egger                  | 16.80927943 | 14 | 0.266483971 |
| 758 | XTu0EY | j7whIN | Forced vital capacity (FVC), Best measure | genus.Intestinimonas.id.2062              | Inverse variance weighted | 19.22001628 | 15 | 0.203936413 |
| 759 | XVFzMF | j7whIN | Forced vital capacity (FVC), Best measure | genus.Holdemania.id.2157                  | MR Egger                  | 37.63831986 | 12 | 0.000175923 |
| 760 | XVFzMF | j7whIN | Forced vital capacity (FVC), Best measure | genus.Holdemania.id.2157                  | Inverse variance weighted | 39.4669649  | 13 | 0.000168355 |
| 761 | y0FJ9U | j7whIN | Forced vital capacity (FVC), Best measure | genus.LachnospiraceaeND3007group.id.11317 | MR Egger                  | 0.195633304 | 1  | 0.658268848 |
| 762 | y0FJ9U | j7whIN | Forced vital capacity (FVC), Best measure | genus.LachnospiraceaeND3007group.id.11317 | Inverse variance weighted | 10.31416631 | 2  | 0.005758472 |
| 763 | Y7cF3n | j7whIN | Forced vital capacity (FVC), Best measure | family.Methanobacteriaceae.id.121         | MR Egger                  | 5.353815316 | 6  | 0.499298114 |
| 764 | Y7cF3n | j7whIN | Forced vital capacity (FVC), Best measure | family.Methanobacteriaceae.id.121         | Inverse variance weighted | 5.639246085 | 7  | 0.582445597 |
| 765 | yakWtY | j7whIN | Forced vital capacity (FVC), Best measure | genus.Butyricoccus.id.2055                | MR Egger                  | 18.71051275 | 6  | 0.004681519 |

|     | A      | B      | C                                                                 | D                                      | E                         | F           | G  | H           |
|-----|--------|--------|-------------------------------------------------------------------|----------------------------------------|---------------------------|-------------|----|-------------|
| 766 | yakWtY | j7whIN | Forced vital capacity (FVC), Best measure                         | genus.Butyricococcus.id.2055           | Inverse variance weighted | 27.96567367 | 7  | 0.000223064 |
| 767 | yerINC | j7whIN | Forced vital capacity (FVC), Best measure                         | genus.RuminococcaceaeUCG005.id.11363   | MR Egger                  | 18.88947375 | 12 | 0.091230907 |
| 768 | yerINC | j7whIN | Forced vital capacity (FVC), Best measure                         | genus.RuminococcaceaeUCG005.id.11363   | Inverse variance weighted | 19.22772276 | 13 | 0.116210566 |
| 769 | yfxJv6 | j7whIN | Forced vital capacity (FVC), Best measure                         | family.Erysipelotrichaceae.id.2149     | MR Egger                  | 8.653896405 | 11 | 0.653804737 |
| 770 | yfxJv6 | j7whIN | Forced vital capacity (FVC), Best measure                         | family.Erysipelotrichaceae.id.2149     | Inverse variance weighted | 10.16781928 | 12 | 0.601240677 |
| 771 | ygbSF7 | j7whIN | Forced vital capacity (FVC), Best measure                         | genus.Fusicatenibacter.id.11305        | MR Egger                  | 43.23136081 | 16 | 0.000257886 |
| 772 | ygbSF7 | j7whIN | Forced vital capacity (FVC), Best measure                         | genus.Fusicatenibacter.id.11305        | Inverse variance weighted | 47.47057777 | 17 | 0.000103415 |
| 773 | ylev3A | j7whIN | Forced vital capacity (FVC), Best measure                         | family.FamilyXIII.id.1957              | MR Egger                  | 21.17979468 | 8  | 0.00668485  |
| 774 | ylev3A | j7whIN | Forced vital capacity (FVC), Best measure                         | family.FamilyXIII.id.1957              | Inverse variance weighted | 21.77469999 | 9  | 0.009621107 |
| 775 | yLt27i | j7whIN | Forced vital capacity (FVC), Best measure                         | genus.Senegalimassilia.id.11160        | MR Egger                  | 8.304210705 | 3  | 0.040125684 |
| 776 | yLt27i | j7whIN | Forced vital capacity (FVC), Best measure                         | genus.Senegalimassilia.id.11160        | Inverse variance weighted | 9.438538146 | 4  | 0.051025587 |
| 777 | YXZeGZ | j7whIN | Forced vital capacity (FVC), Best measure                         | genus.Alistipes.id.968                 | MR Egger                  | 23.31001889 | 12 | 0.025206355 |
| 778 | YXZeGZ | j7whIN | Forced vital capacity (FVC), Best measure                         | genus.Alistipes.id.968                 | Inverse variance weighted | 25.20331132 | 13 | 0.021703638 |
| 779 | YYHfMs | j7whIN | Forced vital capacity (FVC), Best measure                         | genus.Gordonibacter.id.821             | MR Egger                  | 15.94234917 | 9  | 0.068095292 |
| 780 | YYHfMs | j7whIN | Forced vital capacity (FVC), Best measure                         | genus.Gordonibacter.id.821             | Inverse variance weighted | 15.95722358 | 10 | 0.10086349  |
| 781 | zaZf8A | j7whIN | Forced vital capacity (FVC), Best measure                         | genus.Oscillospira.id.2064             | MR Egger                  | 13.31163507 | 6  | 0.0383456   |
| 782 | zaZf8A | j7whIN | Forced vital capacity (FVC), Best measure                         | genus.Oscillospira.id.2064             | Inverse variance weighted | 14.39503563 | 7  | 0.044585128 |
| 783 | ZJXDpG | j7whIN | Forced vital capacity (FVC), Best measure                         | class.Erysipelotrichia.id.2147         | MR Egger                  | 8.653896405 | 11 | 0.653804737 |
| 784 | ZJXDpG | j7whIN | Forced vital capacity (FVC), Best measure                         | class.Erysipelotrichia.id.2147         | Inverse variance weighted | 10.16781928 | 12 | 0.601240677 |
| 785 | zkWLyl | j7whIN | Forced vital capacity (FVC), Best measure                         | genus.Allisonella.id.2174              | MR Egger                  | 6.197540105 | 6  | 0.401429442 |
| 786 | zkWLyl | j7whIN | Forced vital capacity (FVC), Best measure                         | genus.Allisonella.id.2174              | Inverse variance weighted | 6.500461166 | 7  | 0.482671967 |
| 787 | 0aMbT3 | QoRiKP | Forced expiratory volume in 1-second (FEV1), predicted percentage | genus.Eggerthella.id.819               | MR Egger                  | 11.14521359 | 9  | 0.265886515 |
| 788 | 0aMbT3 | QoRiKP | Forced expiratory volume in 1-second (FEV1), predicted percentage | genus.Eggerthella.id.819               | Inverse variance weighted | 19.10185027 | 10 | 0.038987938 |
| 789 | 0heWA4 | QoRiKP | Forced expiratory volume in 1-second (FEV1), predicted percentage | genus.Lactococcus.id.1851              | MR Egger                  | 7.815749172 | 7  | 0.349121158 |
| 790 | 0heWA4 | QoRiKP | Forced expiratory volume in 1-second (FEV1), predicted percentage | genus.Lactococcus.id.1851              | Inverse variance weighted | 17.66540792 | 8  | 0.023879732 |
| 791 | 0IsDjy | QoRiKP | Forced expiratory volume in 1-second (FEV1), predicted percentage | genus.DefluviitaleaceaeUCG011.id.11287 | MR Egger                  | 10.71645847 | 7  | 0.151474062 |
| 792 | 0IsDjy | QoRiKP | Forced expiratory volume in 1-second (FEV1), predicted percentage | genus.DefluviitaleaceaeUCG011.id.11287 | Inverse variance weighted | 12.94047803 | 8  | 0.11391405  |
| 793 | 0ngO8p | QoRiKP | Forced expiratory volume in 1-second (FEV1), predicted percentage | genus.Flavonifractor.id.2059           | MR Egger                  | 14.92230616 | 3  | 0.001884262 |
| 794 | 0ngO8p | QoRiKP | Forced expiratory volume in 1-second (FEV1), predicted percentage | genus.Flavonifractor.id.2059           | Inverse variance weighted | 16.35823242 | 4  | 0.00257428  |
| 795 | 0rTnk2 | QoRiKP | Forced expiratory volume in 1-second (FEV1), predicted percentage | genus.Lachnospira.id.2004              | MR Egger                  | 8.088675246 | 4  | 0.088383386 |
| 796 | 0rTnk2 | QoRiKP | Forced expiratory volume in 1-second (FEV1), predicted percentage | genus.Lachnospira.id.2004              | Inverse variance weighted | 11.0135725  | 5  | 0.051111544 |
| 797 | 0rWmph | QoRiKP | Forced expiratory volume in 1-second (FEV1), predicted percentage | phylum.Firmicutes.id.1672              | MR Egger                  | 18.77473614 | 14 | 0.173736493 |
| 798 | 0rWmph | QoRiKP | Forced expiratory volume in 1-second (FEV1), predicted percentage | phylum.Firmicutes.id.1672              | Inverse variance weighted | 20.7498658  | 15 | 0.145013359 |
| 799 | 0Vfsi1 | QoRiKP | Forced expiratory volume in 1-second (FEV1), predicted percentage | genus.Hungatella.id.11306              | MR Egger                  | 3.413804234 | 3  | 0.332114689 |
| 800 | 0Vfsi1 | QoRiKP | Forced expiratory volume in 1-second (FEV1), predicted percentage | genus.Hungatella.id.11306              | Inverse variance weighted | 3.417508298 | 4  | 0.490531715 |
| 801 | 1rpkul | QoRiKP | Forced expiratory volume in 1-second (FEV1), predicted percentage | genus.FamilyXIIIUCG001.id.11294        | MR Egger                  | 3.463949947 | 6  | 0.748759659 |
| 802 | 1rpkul | QoRiKP | Forced expiratory volume in 1-second (FEV1), predicted percentage | genus.FamilyXIIIUCG001.id.11294        | Inverse variance weighted | 3.957292727 | 7  | 0.784683123 |
| 803 | 1uqUdL | QoRiKP | Forced expiratory volume in 1-second (FEV1), predicted percentage | genus.Escherichia.Shigella.id.3504     | MR Egger                  | 15.05405532 | 8  | 0.058102871 |
| 804 | 1uqUdL | QoRiKP | Forced expiratory volume in 1-second (FEV1), predicted percentage | genus.Escherichia.Shigella.id.3504     | Inverse variance weighted | 15.14791658 | 9  | 0.086952273 |
| 805 | 1zf0TZ | QoRiKP | Forced expiratory volume in 1-second (FEV1), predicted percentage | family.Streptococcaceae.id.1850        | MR Egger                  | 16.76423659 | 10 | 0.079746343 |
| 806 | 1zf0TZ | QoRiKP | Forced expiratory volume in 1-second (FEV1), predicted percentage | family.Streptococcaceae.id.1850        | Inverse variance weighted | 17.48268714 | 11 | 0.094386557 |
| 807 | 20HL0T | QoRiKP | Forced expiratory volume in 1-second (FEV1), predicted percentage | genus.Holdemanella.id.11393            | MR Egger                  | 8.080672665 | 9  | 0.526037275 |
| 808 | 20HL0T | QoRiKP | Forced expiratory volume in 1-second (FEV1), predicted percentage | genus.Holdemanella.id.11393            | Inverse variance weighted | 11.19640824 | 10 | 0.342422213 |
| 809 | 2GJP3o | QoRiKP | Forced expiratory volume in 1-second (FEV1), predicted percentage | genus.Ruminococcus2.id.11374           | MR Egger                  | 6.541938682 | 12 | 0.886342602 |
| 810 | 2GJP3o | QoRiKP | Forced expiratory volume in 1-second (FEV1), predicted percentage | genus.Ruminococcus2.id.11374           | Inverse variance weighted | 12.03075229 | 13 | 0.525123788 |
| 811 | 2neTKK | QoRiKP | Forced expiratory volume in 1-second (FEV1), predicted percentage | phylum.Euryarchaeota.id.55             | MR Egger                  | 4.280479091 | 9  | 0.892001523 |
| 812 | 2neTKK | QoRiKP | Forced expiratory volume in 1-second (FEV1), predicted percentage | phylum.Euryarchaeota.id.55             | Inverse variance weighted | 4.389200805 | 10 | 0.928086374 |
| 813 | 2vslhf | QoRiKP | Forced expiratory volume in 1-second (FEV1), predicted percentage | genus.Coproccoccus2.id.11302           | MR Egger                  | 6.774353371 | 6  | 0.342220004 |
| 814 | 2vslhf | QoRiKP | Forced expiratory volume in 1-second (FEV1), predicted percentage | genus.Coproccoccus2.id.11302           | Inverse variance weighted | 9.57872801  | 7  | 0.213729521 |
| 815 | 31r1VV | QoRiKP | Forced expiratory volume in 1-second (FEV1), predicted percentage | family.Christensenellaceae.id.1866     | MR Egger                  | 11.03982366 | 9  | 0.272989105 |
| 816 | 31r1VV | QoRiKP | Forced expiratory volume in 1-second (FEV1), predicted percentage | family.Christensenellaceae.id.1866     | Inverse variance weighted | 11.18799534 | 10 | 0.343060316 |

|     | A      | B      | C                                                                 | D                                           | E                         | F           | G  | H           |
|-----|--------|--------|-------------------------------------------------------------------|---------------------------------------------|---------------------------|-------------|----|-------------|
| 817 | 37ZEpl | QoRIKP | Forced expiratory volume in 1-second (FEV1), predicted percentage | genus..Eubacteriumrectalegroup.id.14374     | MR Egger                  | 1.751538345 | 6  | 0.941073474 |
| 818 | 37ZEpl | QoRIKP | Forced expiratory volume in 1-second (FEV1), predicted percentage | genus..Eubacteriumrectalegroup.id.14374     | Inverse variance weighted | 2.76872701  | 7  | 0.9055411   |
| 819 | 3cOJ1f | QoRIKP | Forced expiratory volume in 1-second (FEV1), predicted percentage | class.Actinobacteria.id.419                 | MR Egger                  | 28.98697341 | 11 | 0.002280548 |
| 820 | 3cOJ1f | QoRIKP | Forced expiratory volume in 1-second (FEV1), predicted percentage | class.Actinobacteria.id.419                 | Inverse variance weighted | 29.03604441 | 12 | 0.003891725 |
| 821 | 3Oo7Td | QoRIKP | Forced expiratory volume in 1-second (FEV1), predicted percentage | class.Methanobacteria.id.119                | MR Egger                  | 10.59322616 | 6  | 0.101791675 |
| 822 | 3Oo7Td | QoRIKP | Forced expiratory volume in 1-second (FEV1), predicted percentage | class.Methanobacteria.id.119                | Inverse variance weighted | 12.18838822 | 7  | 0.094531354 |
| 823 | 3tgfXE | QoRIKP | Forced expiratory volume in 1-second (FEV1), predicted percentage | genus.Subdoligranulum.id.2070               | MR Egger                  | 15.79190307 | 8  | 0.045457333 |
| 824 | 3tgfXE | QoRIKP | Forced expiratory volume in 1-second (FEV1), predicted percentage | genus.Subdoligranulum.id.2070               | Inverse variance weighted | 15.87064347 | 9  | 0.069632524 |
| 825 | 4zBtt2 | QoRIKP | Forced expiratory volume in 1-second (FEV1), predicted percentage | genus.Bilophila.id.3170                     | MR Egger                  | 15.33235147 | 10 | 0.120406534 |
| 826 | 4zBtt2 | QoRIKP | Forced expiratory volume in 1-second (FEV1), predicted percentage | genus.Bilophila.id.3170                     | Inverse variance weighted | 16.40968577 | 11 | 0.126589958 |
| 827 | 5IXuob | QoRIKP | Forced expiratory volume in 1-second (FEV1), predicted percentage | genus.RuminococcaceaeUCG014.id.11371        | MR Egger                  | 13.39425142 | 9  | 0.145563075 |
| 828 | 5IXuob | QoRIKP | Forced expiratory volume in 1-second (FEV1), predicted percentage | genus.RuminococcaceaeUCG014.id.11371        | Inverse variance weighted | 13.63133876 | 10 | 0.190481087 |
| 829 | 5qEcKL | QoRIKP | Forced expiratory volume in 1-second (FEV1), predicted percentage | genus.Streptococcus.id.1853                 | MR Egger                  | 22.19247094 | 12 | 0.035418446 |
| 830 | 5qEcKL | QoRIKP | Forced expiratory volume in 1-second (FEV1), predicted percentage | genus.Streptococcus.id.1853                 | Inverse variance weighted | 24.75890197 | 13 | 0.024825422 |
| 831 | 5TN0Z7 | QoRIKP | Forced expiratory volume in 1-second (FEV1), predicted percentage | genus.Oscillibacter.id.2063                 | MR Egger                  | 8.423117973 | 9  | 0.492131257 |
| 832 | 5TN0Z7 | QoRIKP | Forced expiratory volume in 1-second (FEV1), predicted percentage | genus.Oscillibacter.id.2063                 | Inverse variance weighted | 10.05333529 | 10 | 0.435826528 |
| 833 | 5XtLwc | QoRIKP | Forced expiratory volume in 1-second (FEV1), predicted percentage | genus.Catenibacterium.id.2153               | MR Egger                  | 5.866133926 | 3  | 0.118307876 |
| 834 | 5XtLwc | QoRIKP | Forced expiratory volume in 1-second (FEV1), predicted percentage | genus.Catenibacterium.id.2153               | Inverse variance weighted | 7.411595826 | 4  | 0.115671319 |
| 835 | 6gX3qe | QoRIKP | Forced expiratory volume in 1-second (FEV1), predicted percentage | phylum.Tenericutes.id.3919                  | MR Egger                  | 22.88211432 | 10 | 0.011190178 |
| 836 | 6gX3qe | QoRIKP | Forced expiratory volume in 1-second (FEV1), predicted percentage | phylum.Tenericutes.id.3919                  | Inverse variance weighted | 23.43467952 | 11 | 0.015338908 |
| 837 | 6jMcBB | QoRIKP | Forced expiratory volume in 1-second (FEV1), predicted percentage | family.Desulfovibrionaceae.id.3169          | MR Egger                  | 14.5145088  | 8  | 0.069302013 |
| 838 | 6jMcBB | QoRIKP | Forced expiratory volume in 1-second (FEV1), predicted percentage | family.Desulfovibrionaceae.id.3169          | Inverse variance weighted | 15.76522998 | 9  | 0.071949027 |
| 839 | 6mlWxZ | QoRIKP | Forced expiratory volume in 1-second (FEV1), predicted percentage | genus.Coprobacter.id.949                    | MR Egger                  | 17.34053417 | 9  | 0.043642751 |
| 840 | 6mlWxZ | QoRIKP | Forced expiratory volume in 1-second (FEV1), predicted percentage | genus.Coprobacter.id.949                    | Inverse variance weighted | 20.40912263 | 10 | 0.025612098 |
| 841 | 77YJKV | QoRIKP | Forced expiratory volume in 1-second (FEV1), predicted percentage | genus..Eubacteriumruminantiumgroup.id.11340 | MR Egger                  | 18.82010106 | 16 | 0.278102487 |
| 842 | 77YJKV | QoRIKP | Forced expiratory volume in 1-second (FEV1), predicted percentage | genus..Eubacteriumruminantiumgroup.id.11340 | Inverse variance weighted | 19.52907327 | 17 | 0.299021789 |
| 843 | 7aTYpg | QoRIKP | Forced expiratory volume in 1-second (FEV1), predicted percentage | genus.Collinsella.id.815                    | MR Egger                  | 2.902225419 | 7  | 0.893897406 |
| 844 | 7aTYpg | QoRIKP | Forced expiratory volume in 1-second (FEV1), predicted percentage | genus.Collinsella.id.815                    | Inverse variance weighted | 3.108027143 | 8  | 0.927396329 |
| 845 | 7dqLOH | QoRIKP | Forced expiratory volume in 1-second (FEV1), predicted percentage | genus..Clostridiuminnocuumgroup.id.14397    | MR Egger                  | 4.078222278 | 7  | 0.77072495  |
| 846 | 7dqLOH | QoRIKP | Forced expiratory volume in 1-second (FEV1), predicted percentage | genus..Clostridiuminnocuumgroup.id.14397    | Inverse variance weighted | 4.393267184 | 8  | 0.820013982 |
| 847 | 7ioeKt | QoRIKP | Forced expiratory volume in 1-second (FEV1), predicted percentage | phylum.Proteobacteria.id.2375               | MR Egger                  | 31.101779   | 9  | 0.000284362 |
| 848 | 7ioeKt | QoRIKP | Forced expiratory volume in 1-second (FEV1), predicted percentage | phylum.Proteobacteria.id.2375               | Inverse variance weighted | 35.17792734 | 10 | 0.000116428 |
| 849 | 80h8vf | QoRIKP | Forced expiratory volume in 1-second (FEV1), predicted percentage | genus.Anaerostipes.id.1991                  | MR Egger                  | 21.86741471 | 10 | 0.015794471 |
| 850 | 80h8vf | QoRIKP | Forced expiratory volume in 1-second (FEV1), predicted percentage | genus.Anaerostipes.id.1991                  | Inverse variance weighted | 21.87087444 | 11 | 0.025392897 |
| 851 | 8jKldu | QoRIKP | Forced expiratory volume in 1-second (FEV1), predicted percentage | genus.Coprococcus3.id.11303                 | MR Egger                  | 8.684373773 | 7  | 0.276117886 |
| 852 | 8jKldu | QoRIKP | Forced expiratory volume in 1-second (FEV1), predicted percentage | genus.Coprococcus3.id.11303                 | Inverse variance weighted | 11.52955329 | 8  | 0.173460285 |
| 853 | 8NULRM | QoRIKP | Forced expiratory volume in 1-second (FEV1), predicted percentage | genus.Paraprevotella.id.962                 | MR Egger                  | 7.858778922 | 10 | 0.642629    |
| 854 | 8NULRM | QoRIKP | Forced expiratory volume in 1-second (FEV1), predicted percentage | genus.Paraprevotella.id.962                 | Inverse variance weighted | 8.328892787 | 11 | 0.683574239 |
| 855 | 9i4tiU | QoRIKP | Forced expiratory volume in 1-second (FEV1), predicted percentage | order.Gastranaerophilales.id.1591           | MR Egger                  | 5.971184339 | 7  | 0.543118028 |
| 856 | 9i4tiU | QoRIKP | Forced expiratory volume in 1-second (FEV1), predicted percentage | order.Gastranaerophilales.id.1591           | Inverse variance weighted | 7.811435915 | 8  | 0.452103229 |
| 857 | 9s731W | QoRIKP | Forced expiratory volume in 1-second (FEV1), predicted percentage | genus.RuminococcaceaeUCG009.id.11366        | MR Egger                  | 13.3387902  | 10 | 0.205341617 |
| 858 | 9s731W | QoRIKP | Forced expiratory volume in 1-second (FEV1), predicted percentage | genus.RuminococcaceaeUCG009.id.11366        | Inverse variance weighted | 14.27341519 | 11 | 0.218231815 |
| 859 | aclMuF | QoRIKP | Forced expiratory volume in 1-second (FEV1), predicted percentage | genus.Parasutterella.id.2892                | MR Egger                  | 23.29676594 | 12 | 0.025309579 |
| 860 | aclMuF | QoRIKP | Forced expiratory volume in 1-second (FEV1), predicted percentage | genus.Parasutterella.id.2892                | Inverse variance weighted | 25.49201796 | 13 | 0.019874976 |
| 861 | AdsBD9 | QoRIKP | Forced expiratory volume in 1-second (FEV1), predicted percentage | genus.Turicibacter.id.2162                  | MR Egger                  | 7.303054156 | 8  | 0.504316172 |
| 862 | AdsBD9 | QoRIKP | Forced expiratory volume in 1-second (FEV1), predicted percentage | genus.Turicibacter.id.2162                  | Inverse variance weighted | 8.61387905  | 9  | 0.473651926 |
| 863 | aGfu8V | QoRIKP | Forced expiratory volume in 1-second (FEV1), predicted percentage | order.Bifidobacteriales.id.432              | MR Egger                  | 9.324474825 | 8  | 0.315667349 |
| 864 | aGfu8V | QoRIKP | Forced expiratory volume in 1-second (FEV1), predicted percentage | order.Bifidobacteriales.id.432              | Inverse variance weighted | 9.372592727 | 9  | 0.403615347 |
| 865 | AK0I7A | QoRIKP | Forced expiratory volume in 1-second (FEV1), predicted percentage | genus.LachnospiraceaeUCG010.id.11330        | MR Egger                  | 15.99004402 | 8  | 0.042522835 |
| 866 | AK0I7A | QoRIKP | Forced expiratory volume in 1-second (FEV1), predicted percentage | genus.LachnospiraceaeUCG010.id.11330        | Inverse variance weighted | 16.48660103 | 9  | 0.05738963  |
| 867 | aKuChq | QoRIKP | Forced expiratory volume in 1-second (FEV1), predicted percentage | genus.Faecalibacterium.id.2057              | MR Egger                  | 15.84503045 | 7  | 0.026570517 |

|     | A      | B      | C                                                                 | D                                           | E                         | F           | G  | H           |
|-----|--------|--------|-------------------------------------------------------------------|---------------------------------------------|---------------------------|-------------|----|-------------|
| 868 | aKuChq | QoRiKP | Forced expiratory volume in 1-second (FEV1), predicted percentage | genus.Faecalibacterium.id.2057              | Inverse variance weighted | 15.87363628 | 8  | 0.044224892 |
| 869 | aKXyAu | QoRiKP | Forced expiratory volume in 1-second (FEV1), predicted percentage | genus.Blautia.id.1992                       | MR Egger                  | 9.36679304  | 10 | 0.497682962 |
| 870 | aKXyAu | QoRiKP | Forced expiratory volume in 1-second (FEV1), predicted percentage | genus.Blautia.id.1992                       | Inverse variance weighted | 10.0818407  | 11 | 0.523040909 |
| 871 | AN8qjo | QoRiKP | Forced expiratory volume in 1-second (FEV1), predicted percentage | genus.Clostridiumsensustricto1.id.1873      | MR Egger                  | 5.267023078 | 5  | 0.384168906 |
| 872 | AN8qjo | QoRiKP | Forced expiratory volume in 1-second (FEV1), predicted percentage | genus.Clostridiumsensustricto1.id.1873      | Inverse variance weighted | 7.922723488 | 6  | 0.243819642 |
| 873 | anDrA2 | QoRiKP | Forced expiratory volume in 1-second (FEV1), predicted percentage | genus..Eubacteriumventriosumgroup.id.11341  | MR Egger                  | 6.265745085 | 12 | 0.902097636 |
| 874 | anDrA2 | QoRiKP | Forced expiratory volume in 1-second (FEV1), predicted percentage | genus..Eubacteriumventriosumgroup.id.11341  | Inverse variance weighted | 6.382897009 | 13 | 0.931101158 |
| 875 | ASQ2fp | QoRiKP | Forced expiratory volume in 1-second (FEV1), predicted percentage | genus.RuminococcaceaeNK4A214group.id.11358  | MR Egger                  | 15.58670185 | 11 | 0.157181086 |
| 876 | ASQ2fp | QoRiKP | Forced expiratory volume in 1-second (FEV1), predicted percentage | genus.RuminococcaceaeNK4A214group.id.11358  | Inverse variance weighted | 15.6239916  | 12 | 0.209071088 |
| 877 | aToCrK | QoRiKP | Forced expiratory volume in 1-second (FEV1), predicted percentage | genus.Anaerotruncus.id.2054                 | MR Egger                  | 21.87684374 | 11 | 0.0253449   |
| 878 | aToCrK | QoRiKP | Forced expiratory volume in 1-second (FEV1), predicted percentage | genus.Anaerotruncus.id.2054                 | Inverse variance weighted | 23.70478847 | 12 | 0.022304704 |
| 879 | axDRMS | QoRiKP | Forced expiratory volume in 1-second (FEV1), predicted percentage | family.Prevotellaceae.id.960                | MR Egger                  | 16.15693424 | 13 | 0.240759269 |
| 880 | axDRMS | QoRiKP | Forced expiratory volume in 1-second (FEV1), predicted percentage | family.Prevotellaceae.id.960                | Inverse variance weighted | 16.51112721 | 14 | 0.283166306 |
| 881 | AXpdwL | QoRiKP | Forced expiratory volume in 1-second (FEV1), predicted percentage | family.Verrucomicrobiaceae.id.4036          | MR Egger                  | 13.33956145 | 9  | 0.147833733 |
| 882 | AXpdwL | QoRiKP | Forced expiratory volume in 1-second (FEV1), predicted percentage | family.Verrucomicrobiaceae.id.4036          | Inverse variance weighted | 13.46716172 | 10 | 0.198711844 |
| 883 | B5jn0Y | QoRiKP | Forced expiratory volume in 1-second (FEV1), predicted percentage | genus.Roseburia.id.2012                     | MR Egger                  | 12.60324815 | 11 | 0.320045458 |
| 884 | B5jn0Y | QoRiKP | Forced expiratory volume in 1-second (FEV1), predicted percentage | genus.Roseburia.id.2012                     | Inverse variance weighted | 13.36646469 | 12 | 0.342976543 |
| 885 | BiKMtW | QoRiKP | Forced expiratory volume in 1-second (FEV1), predicted percentage | genus.Sutterella.id.2896                    | MR Egger                  | 22.95259143 | 10 | 0.01092293  |
| 886 | BiKMtW | QoRiKP | Forced expiratory volume in 1-second (FEV1), predicted percentage | genus.Sutterella.id.2896                    | Inverse variance weighted | 24.03321682 | 11 | 0.012593887 |
| 887 | BLC7wV | QoRiKP | Forced expiratory volume in 1-second (FEV1), predicted percentage | genus.RuminococcaceaeUCG013.id.11370        | MR Egger                  | 15.62386132 | 10 | 0.110917997 |
| 888 | BLC7wV | QoRiKP | Forced expiratory volume in 1-second (FEV1), predicted percentage | genus.RuminococcaceaeUCG013.id.11370        | Inverse variance weighted | 17.73366011 | 11 | 0.087969959 |
| 889 | BLSFBU | QoRiKP | Forced expiratory volume in 1-second (FEV1), predicted percentage | family.Rikenellaceae.id.967                 | MR Egger                  | 41.30618401 | 17 | 0.000843923 |
| 890 | BLSFBU | QoRiKP | Forced expiratory volume in 1-second (FEV1), predicted percentage | family.Rikenellaceae.id.967                 | Inverse variance weighted | 41.31470412 | 18 | 0.001377292 |
| 891 | BPW89n | QoRiKP | Forced expiratory volume in 1-second (FEV1), predicted percentage | order.Verrucomicrobiales.id.4030            | MR Egger                  | 13.33979916 | 9  | 0.1478238   |
| 892 | BPW89n | QoRiKP | Forced expiratory volume in 1-second (FEV1), predicted percentage | order.Verrucomicrobiales.id.4030            | Inverse variance weighted | 13.46896235 | 10 | 0.198620068 |
| 893 | Bt0kEx | QoRiKP | Forced expiratory volume in 1-second (FEV1), predicted percentage | genus.LachnospiraceaeNK4A136group.id.11319  | MR Egger                  | 11.04868921 | 11 | 0.439193308 |
| 894 | Bt0kEx | QoRiKP | Forced expiratory volume in 1-second (FEV1), predicted percentage | genus.LachnospiraceaeNK4A136group.id.11319  | Inverse variance weighted | 11.0973066  | 12 | 0.520598432 |
| 895 | Bt1upE | QoRiKP | Forced expiratory volume in 1-second (FEV1), predicted percentage | family.Rhodospirillaceae.id.2717            | MR Egger                  | 22.54209665 | 12 | 0.03187471  |
| 896 | Bt1upE | QoRiKP | Forced expiratory volume in 1-second (FEV1), predicted percentage | family.Rhodospirillaceae.id.2717            | Inverse variance weighted | 27.72117598 | 13 | 0.009895366 |
| 897 | C1xV1V | QoRiKP | Forced expiratory volume in 1-second (FEV1), predicted percentage | order.Victivallales.id.2254                 | MR Egger                  | 8.193229005 | 6  | 0.224285968 |
| 898 | C1xV1V | QoRiKP | Forced expiratory volume in 1-second (FEV1), predicted percentage | order.Victivallales.id.2254                 | Inverse variance weighted | 10.67908    | 7  | 0.153242882 |
| 899 | c62fwk | QoRiKP | Forced expiratory volume in 1-second (FEV1), predicted percentage | genus.Sellimonas.id.14369                   | MR Egger                  | 15.54810257 | 6  | 0.016396374 |
| 900 | c62fwk | QoRiKP | Forced expiratory volume in 1-second (FEV1), predicted percentage | genus.Sellimonas.id.14369                   | Inverse variance weighted | 22.09950987 | 7  | 0.002441973 |
| 901 | cqFLTQ | QoRiKP | Forced expiratory volume in 1-second (FEV1), predicted percentage | genus.Coproccoccus1.id.11301                | MR Egger                  | 10.51641777 | 10 | 0.396411486 |
| 902 | cqFLTQ | QoRiKP | Forced expiratory volume in 1-second (FEV1), predicted percentage | genus.Coproccoccus1.id.11301                | Inverse variance weighted | 16.66122408 | 11 | 0.118303533 |
| 903 | CUtsMo | QoRiKP | Forced expiratory volume in 1-second (FEV1), predicted percentage | family.ClostridialesvadinBB60group.id.11286 | MR Egger                  | 18.05825585 | 12 | 0.113933089 |
| 904 | CUtsMo | QoRiKP | Forced expiratory volume in 1-second (FEV1), predicted percentage | family.ClostridialesvadinBB60group.id.11286 | Inverse variance weighted | 18.33402516 | 13 | 0.145243591 |
| 905 | CYNr8c | QoRiKP | Forced expiratory volume in 1-second (FEV1), predicted percentage | order.Actinomycetales.id.420                | MR Egger                  | 1.835306132 | 3  | 0.607282229 |
| 906 | CYNr8c | QoRiKP | Forced expiratory volume in 1-second (FEV1), predicted percentage | order.Actinomycetales.id.420                | Inverse variance weighted | 5.488949575 | 4  | 0.24070253  |
| 907 | d9u3Wa | QoRiKP | Forced expiratory volume in 1-second (FEV1), predicted percentage | family.Lactobacillaceae.id.1836             | MR Egger                  | 8.308317775 | 6  | 0.21637411  |
| 908 | d9u3Wa | QoRiKP | Forced expiratory volume in 1-second (FEV1), predicted percentage | family.Lactobacillaceae.id.1836             | Inverse variance weighted | 8.681353921 | 7  | 0.27635016  |
| 909 | dP6VTT | QoRiKP | Forced expiratory volume in 1-second (FEV1), predicted percentage | class.Alphaproteobacteria.id.2379           | MR Egger                  | 8.70603394  | 5  | 0.12137976  |
| 910 | dP6VTT | QoRiKP | Forced expiratory volume in 1-second (FEV1), predicted percentage | class.Alphaproteobacteria.id.2379           | Inverse variance weighted | 12.89379036 | 6  | 0.044753913 |
| 911 | dSCeM7 | QoRiKP | Forced expiratory volume in 1-second (FEV1), predicted percentage | order.Enterobacteriales.id.3468             | MR Egger                  | 4.381182183 | 5  | 0.495936458 |
| 912 | dSCeM7 | QoRiKP | Forced expiratory volume in 1-second (FEV1), predicted percentage | order.Enterobacteriales.id.3468             | Inverse variance weighted | 14.63489144 | 6  | 0.023294665 |
| 913 | DwGyne | QoRiKP | Forced expiratory volume in 1-second (FEV1), predicted percentage | family.BacteroidalesS24.7group.id.11173     | MR Egger                  | 6.514217757 | 6  | 0.368112929 |
| 914 | DwGyne | QoRiKP | Forced expiratory volume in 1-second (FEV1), predicted percentage | family.BacteroidalesS24.7group.id.11173     | Inverse variance weighted | 8.51021289  | 7  | 0.289757457 |
| 915 | E1ZDX3 | QoRiKP | Forced expiratory volume in 1-second (FEV1), predicted percentage | genus.Oxalobacter.id.2978                   | MR Egger                  | 3.802939574 | 9  | 0.923897135 |
| 916 | E1ZDX3 | QoRiKP | Forced expiratory volume in 1-second (FEV1), predicted percentage | genus.Oxalobacter.id.2978                   | Inverse variance weighted | 3.976119378 | 10 | 0.948417848 |
| 917 | e5mJnF | QoRiKP | Forced expiratory volume in 1-second (FEV1), predicted percentage | genus.Dorea.id.1997                         | MR Egger                  | 8.476659594 | 8  | 0.388345031 |
| 918 | e5mJnF | QoRiKP | Forced expiratory volume in 1-second (FEV1), predicted percentage | genus.Dorea.id.1997                         | Inverse variance weighted | 10.43102833 | 9  | 0.316730288 |

|     | A      | B      | C                                                                 | D                                           | E                         | F           | G  | H           |
|-----|--------|--------|-------------------------------------------------------------------|---------------------------------------------|---------------------------|-------------|----|-------------|
| 919 | ebP4zV | QoRIKP | Forced expiratory volume in 1-second (FEV1), predicted percentage | genus.Ruminococcus1.id.11373                | MR Egger                  | 16.55117176 | 8  | 0.035137214 |
| 920 | ebP4zV | QoRIKP | Forced expiratory volume in 1-second (FEV1), predicted percentage | genus.Ruminococcus1.id.11373                | Inverse variance weighted | 16.9502158  | 9  | 0.049501323 |
| 921 | FcqSNY | QoRIKP | Forced expiratory volume in 1-second (FEV1), predicted percentage | family.Clostridiaceae1.id.1869              | MR Egger                  | 3.502047616 | 8  | 0.899030677 |
| 922 | FcqSNY | QoRIKP | Forced expiratory volume in 1-second (FEV1), predicted percentage | family.Clostridiaceae1.id.1869              | Inverse variance weighted | 10.75277137 | 9  | 0.293036635 |
| 923 | fE3r8h | QoRIKP | Forced expiratory volume in 1-second (FEV1), predicted percentage | phylum.Verrucomicrobia.id.3982              | MR Egger                  | 21.67457189 | 10 | 0.016851059 |
| 924 | fE3r8h | QoRIKP | Forced expiratory volume in 1-second (FEV1), predicted percentage | phylum.Verrucomicrobia.id.3982              | Inverse variance weighted | 22.04352458 | 11 | 0.024038213 |
| 925 | FFi1Rd | QoRIKP | Forced expiratory volume in 1-second (FEV1), predicted percentage | family.Actinomycetaceae.id.421              | MR Egger                  | 1.839275262 | 3  | 0.60642572  |
| 926 | FFi1Rd | QoRIKP | Forced expiratory volume in 1-second (FEV1), predicted percentage | family.Actinomycetaceae.id.421              | Inverse variance weighted | 5.486592491 | 4  | 0.240910527 |
| 927 | FIVBaS | QoRIKP | Forced expiratory volume in 1-second (FEV1), predicted percentage | order.Erysipelotrichales.id.2148            | MR Egger                  | 9.343930252 | 11 | 0.590178539 |
| 928 | FIVBaS | QoRIKP | Forced expiratory volume in 1-second (FEV1), predicted percentage | order.Erysipelotrichales.id.2148            | Inverse variance weighted | 9.885045119 | 12 | 0.626044953 |
| 929 | Fr2Ff4 | QoRIKP | Forced expiratory volume in 1-second (FEV1), predicted percentage | class.Clostridia.id.1859                    | MR Egger                  | 13.48554021 | 10 | 0.197776685 |
| 930 | Fr2Ff4 | QoRIKP | Forced expiratory volume in 1-second (FEV1), predicted percentage | class.Clostridia.id.1859                    | Inverse variance weighted | 13.64307721 | 11 | 0.253376244 |
| 931 | FRQYhm | QoRIKP | Forced expiratory volume in 1-second (FEV1), predicted percentage | class.Gammaproteobacteria.id.3303           | MR Egger                  | 3.496866111 | 5  | 0.623861878 |
| 932 | FRQYhm | QoRIKP | Forced expiratory volume in 1-second (FEV1), predicted percentage | class.Gammaproteobacteria.id.3303           | Inverse variance weighted | 4.359521697 | 6  | 0.628145591 |
| 933 | FT7OrH | QoRIKP | Forced expiratory volume in 1-second (FEV1), predicted percentage | genus.Actinomyces.id.423                    | MR Egger                  | 3.589185774 | 5  | 0.609937728 |
| 934 | FT7OrH | QoRIKP | Forced expiratory volume in 1-second (FEV1), predicted percentage | genus.Actinomyces.id.423                    | Inverse variance weighted | 6.882886491 | 6  | 0.331813803 |
| 935 | FXBXNG | QoRIKP | Forced expiratory volume in 1-second (FEV1), predicted percentage | family.FamilyXI.id.1936                     | MR Egger                  | 12.76564641 | 6  | 0.046912184 |
| 936 | FXBXNG | QoRIKP | Forced expiratory volume in 1-second (FEV1), predicted percentage | family.FamilyXI.id.1936                     | Inverse variance weighted | 12.80149286 | 7  | 0.077095245 |
| 937 | gkAVOW | QoRIKP | Forced expiratory volume in 1-second (FEV1), predicted percentage | phylum.Lentisphaerae.id.2238                | MR Egger                  | 7.997213074 | 7  | 0.332839716 |
| 938 | gkAVOW | QoRIKP | Forced expiratory volume in 1-second (FEV1), predicted percentage | phylum.Lentisphaerae.id.2238                | Inverse variance weighted | 10.78793588 | 8  | 0.214006976 |
| 939 | GNp2YQ | QoRIKP | Forced expiratory volume in 1-second (FEV1), predicted percentage | genus..Ruminococcusgavvreauiigroup.id.11342 | MR Egger                  | 33.61029746 | 10 | 0.000214967 |
| 940 | GNp2YQ | QoRIKP | Forced expiratory volume in 1-second (FEV1), predicted percentage | genus..Ruminococcusgavvreauiigroup.id.11342 | Inverse variance weighted | 34.46792753 | 11 | 0.000303154 |
| 941 | hUph1f | QoRIKP | Forced expiratory volume in 1-second (FEV1), predicted percentage | genus.RikenellaceaeRC9gutgroup.id.11191     | MR Egger                  | 9.340839886 | 9  | 0.406424982 |
| 942 | hUph1f | QoRIKP | Forced expiratory volume in 1-second (FEV1), predicted percentage | genus.RikenellaceaeRC9gutgroup.id.11191     | Inverse variance weighted | 9.506895785 | 10 | 0.484765001 |
| 943 | I2CEyx | QoRIKP | Forced expiratory volume in 1-second (FEV1), predicted percentage | genus.Tyzzerella3.id.11335                  | MR Egger                  | 27.21229676 | 10 | 0.002410285 |
| 944 | I2CEyx | QoRIKP | Forced expiratory volume in 1-second (FEV1), predicted percentage | genus.Tyzzerella3.id.11335                  | Inverse variance weighted | 29.43756325 | 11 | 0.001940641 |
| 945 | I5XXsr | QoRIKP | Forced expiratory volume in 1-second (FEV1), predicted percentage | genus.Prevotella9.id.11183                  | MR Egger                  | 13.73039102 | 12 | 0.318255383 |
| 946 | I5XXsr | QoRIKP | Forced expiratory volume in 1-second (FEV1), predicted percentage | genus.Prevotella9.id.11183                  | Inverse variance weighted | 14.9485619  | 13 | 0.310574951 |
| 947 | iAhkfC | QoRIKP | Forced expiratory volume in 1-second (FEV1), predicted percentage | genus.Erysipelatoclostridium.id.11381       | MR Egger                  | 6.853499734 | 13 | 0.909542519 |
| 948 | iAhkfC | QoRIKP | Forced expiratory volume in 1-second (FEV1), predicted percentage | genus.Erysipelatoclostridium.id.11381       | Inverse variance weighted | 7.993479862 | 14 | 0.88966543  |
| 949 | IgBtIU | QoRIKP | Forced expiratory volume in 1-second (FEV1), predicted percentage | class.Bacilli.id.1673                       | MR Egger                  | 8.421965925 | 15 | 0.90575422  |
| 950 | IgBtIU | QoRIKP | Forced expiratory volume in 1-second (FEV1), predicted percentage | class.Bacilli.id.1673                       | Inverse variance weighted | 8.534009741 | 16 | 0.931357819 |
| 951 | II0qrp | QoRIKP | Forced expiratory volume in 1-second (FEV1), predicted percentage | phylum.Actinobacteria.id.400                | MR Egger                  | 25.03557235 | 12 | 0.014655205 |
| 952 | II0qrp | QoRIKP | Forced expiratory volume in 1-second (FEV1), predicted percentage | phylum.Actinobacteria.id.400                | Inverse variance weighted | 25.87690837 | 13 | 0.017659348 |
| 953 | iMGTCd | QoRIKP | Forced expiratory volume in 1-second (FEV1), predicted percentage | genus.Ruminiclostridium5.id.11355           | MR Egger                  | 10.1387811  | 8  | 0.255420145 |
| 954 | iMGTCd | QoRIKP | Forced expiratory volume in 1-second (FEV1), predicted percentage | genus.Ruminiclostridium5.id.11355           | Inverse variance weighted | 10.34039031 | 9  | 0.323637913 |
| 955 | iwPbIH | QoRIKP | Forced expiratory volume in 1-second (FEV1), predicted percentage | genus.Ruminiclostridium6.id.11356           | MR Egger                  | 24.87674486 | 13 | 0.023959489 |
| 956 | iwPbIH | QoRIKP | Forced expiratory volume in 1-second (FEV1), predicted percentage | genus.Ruminiclostridium6.id.11356           | Inverse variance weighted | 25.20123032 | 14 | 0.032631994 |
| 957 | j0mByI | QoRIKP | Forced expiratory volume in 1-second (FEV1), predicted percentage | order.NB1n.id.3953                          | MR Egger                  | 20.03704479 | 11 | 0.044835217 |
| 958 | j0mByI | QoRIKP | Forced expiratory volume in 1-second (FEV1), predicted percentage | order.NB1n.id.3953                          | Inverse variance weighted | 20.05751504 | 12 | 0.066005764 |
| 959 | j4g0ZV | QoRIKP | Forced expiratory volume in 1-second (FEV1), predicted percentage | genus.CandidatusSoleaferrea.id.11350        | MR Egger                  | 7.376589903 | 7  | 0.390749664 |
| 960 | j4g0ZV | QoRIKP | Forced expiratory volume in 1-second (FEV1), predicted percentage | genus.CandidatusSoleaferrea.id.11350        | Inverse variance weighted | 7.703051853 | 8  | 0.463001172 |
| 961 | j87dXS | QoRIKP | Forced expiratory volume in 1-second (FEV1), predicted percentage | genus.Eisenbergiella.id.11304               | MR Egger                  | 12.22843427 | 9  | 0.200735507 |
| 962 | j87dXS | QoRIKP | Forced expiratory volume in 1-second (FEV1), predicted percentage | genus.Eisenbergiella.id.11304               | Inverse variance weighted | 12.36854038 | 10 | 0.261148266 |
| 963 | jfZByg | QoRIKP | Forced expiratory volume in 1-second (FEV1), predicted percentage | order.Lactobacillales.id.1800               | MR Egger                  | 12.06806251 | 12 | 0.440229053 |
| 964 | jfZByg | QoRIKP | Forced expiratory volume in 1-second (FEV1), predicted percentage | order.Lactobacillales.id.1800               | Inverse variance weighted | 12.07033866 | 13 | 0.521884688 |
| 965 | JHChB7 | QoRIKP | Forced expiratory volume in 1-second (FEV1), predicted percentage | genus.Adlercreutzia.id.812                  | MR Egger                  | 13.14435971 | 6  | 0.040799929 |
| 966 | JHChB7 | QoRIKP | Forced expiratory volume in 1-second (FEV1), predicted percentage | genus.Adlercreutzia.id.812                  | Inverse variance weighted | 13.908812   | 7  | 0.052827194 |
| 967 | jHia6Z | QoRIKP | Forced expiratory volume in 1-second (FEV1), predicted percentage | order.Pasteurellales.id.3688                | MR Egger                  | 11.99024965 | 12 | 0.446463025 |
| 968 | jHia6Z | QoRIKP | Forced expiratory volume in 1-second (FEV1), predicted percentage | order.Pasteurellales.id.3688                | Inverse variance weighted | 18.20069703 | 13 | 0.150046725 |
| 969 | jIC3Fm | QoRIKP | Forced expiratory volume in 1-second (FEV1), predicted percentage | genus.Enterorhabdus.id.820                  | MR Egger                  | 4.799101135 | 4  | 0.308538906 |

|      | A      | B      | C                                                                 | D                                             | E                         | F           | G  | H           |
|------|--------|--------|-------------------------------------------------------------------|-----------------------------------------------|---------------------------|-------------|----|-------------|
| 970  | jUC3Fm | QoRIKP | Forced expiratory volume in 1-second (FEV1), predicted percentage | genus.Enterorhabdus.id.820                    | Inverse variance weighted | 5.769088904 | 5  | 0.329339909 |
| 971  | jUCepg | QoRIKP | Forced expiratory volume in 1-second (FEV1), predicted percentage | genus.Butyricimonas.id.945                    | MR Egger                  | 10.17840711 | 10 | 0.424983017 |
| 972  | jUCepg | QoRIKP | Forced expiratory volume in 1-second (FEV1), predicted percentage | genus.Butyricimonas.id.945                    | Inverse variance weighted | 15.99189452 | 11 | 0.14143206  |
| 973  | kjA5PB | QoRIKP | Forced expiratory volume in 1-second (FEV1), predicted percentage | genus.RuminococcaceaeUCG010.id.11367          | MR Egger                  | 3.19257108  | 4  | 0.52613168  |
| 974  | kjA5PB | QoRIKP | Forced expiratory volume in 1-second (FEV1), predicted percentage | genus.RuminococcaceaeUCG010.id.11367          | Inverse variance weighted | 3.814058182 | 5  | 0.576485574 |
| 975  | kodRd1 | QoRIKP | Forced expiratory volume in 1-second (FEV1), predicted percentage | family.Defluviitaleaceae.id.1924              | MR Egger                  | 6.52181071  | 9  | 0.686768363 |
| 976  | kodRd1 | QoRIKP | Forced expiratory volume in 1-second (FEV1), predicted percentage | family.Defluviitaleaceae.id.1924              | Inverse variance weighted | 7.683950326 | 10 | 0.659677003 |
| 977  | LCZ8yH | QoRIKP | Forced expiratory volume in 1-second (FEV1), predicted percentage | genus.Prevotella7.id.11182                    | MR Egger                  | 20.41984721 | 9  | 0.015490971 |
| 978  | LCZ8yH | QoRIKP | Forced expiratory volume in 1-second (FEV1), predicted percentage | genus.Prevotella7.id.11182                    | Inverse variance weighted | 20.98469668 | 10 | 0.02120053  |
| 979  | lJcL8y | QoRIKP | Forced expiratory volume in 1-second (FEV1), predicted percentage | genus.RuminococcaceaeUCG003.id.11361          | MR Egger                  | 20.55153521 | 10 | 0.024447118 |
| 980  | lJcL8y | QoRIKP | Forced expiratory volume in 1-second (FEV1), predicted percentage | genus.RuminococcaceaeUCG003.id.11361          | Inverse variance weighted | 21.29994786 | 11 | 0.030393376 |
| 981  | LKYg6S | QoRIKP | Forced expiratory volume in 1-second (FEV1), predicted percentage | genus.Terrisporobacter.id.11348               | MR Egger                  | 0.299273773 | 3  | 0.960165006 |
| 982  | LKYg6S | QoRIKP | Forced expiratory volume in 1-second (FEV1), predicted percentage | genus.Terrisporobacter.id.11348               | Inverse variance weighted | 0.299323756 | 4  | 0.989857785 |
| 983  | LRKdIa | QoRIKP | Forced expiratory volume in 1-second (FEV1), predicted percentage | family.Bifidobacteriaceae.id.433              | MR Egger                  | 9.324474825 | 8  | 0.315667349 |
| 984  | LRKdIa | QoRIKP | Forced expiratory volume in 1-second (FEV1), predicted percentage | family.Bifidobacteriaceae.id.433              | Inverse variance weighted | 9.372592727 | 9  | 0.403615347 |
| 985  | m0ByAU | QoRIKP | Forced expiratory volume in 1-second (FEV1), predicted percentage | order.Desulfovibrionales.id.3156              | MR Egger                  | 16.05861846 | 10 | 0.09796663  |
| 986  | m0ByAU | QoRIKP | Forced expiratory volume in 1-second (FEV1), predicted percentage | order.Desulfovibrionales.id.3156              | Inverse variance weighted | 18.26553686 | 11 | 0.075620227 |
| 987  | m9LXEq | QoRIKP | Forced expiratory volume in 1-second (FEV1), predicted percentage | family.Enterobacteriaceae.id.3469             | MR Egger                  | 4.381182183 | 5  | 0.495936458 |
| 988  | m9LXEq | QoRIKP | Forced expiratory volume in 1-second (FEV1), predicted percentage | family.Enterobacteriaceae.id.3469             | Inverse variance weighted | 14.63489144 | 6  | 0.023294665 |
| 989  | MBOR7Y | QoRIKP | Forced expiratory volume in 1-second (FEV1), predicted percentage | family.Coriobacteriaceae.id.811               | MR Egger                  | 18.99009749 | 12 | 0.088767705 |
| 990  | MBOR7Y | QoRIKP | Forced expiratory volume in 1-second (FEV1), predicted percentage | family.Coriobacteriaceae.id.811               | Inverse variance weighted | 19.24148775 | 13 | 0.115804517 |
| 991  | MpL626 | QoRIKP | Forced expiratory volume in 1-second (FEV1), predicted percentage | genus.Lachnoclostridium.id.11308              | MR Egger                  | 15.58378306 | 11 | 0.157299553 |
| 992  | MpL626 | QoRIKP | Forced expiratory volume in 1-second (FEV1), predicted percentage | genus.Lachnoclostridium.id.11308              | Inverse variance weighted | 20.55962445 | 12 | 0.057213061 |
| 993  | Msb4zz | QoRIKP | Forced expiratory volume in 1-second (FEV1), predicted percentage | class.Melainabacteria.id.1589                 | MR Egger                  | 5.861746122 | 8  | 0.662715055 |
| 994  | Msb4zz | QoRIKP | Forced expiratory volume in 1-second (FEV1), predicted percentage | class.Melainabacteria.id.1589                 | Inverse variance weighted | 5.919887346 | 9  | 0.747908785 |
| 995  | MXS84H | QoRIKP | Forced expiratory volume in 1-second (FEV1), predicted percentage | class.Negativicutes.id.2164                   | MR Egger                  | 12.82781462 | 9  | 0.170553503 |
| 996  | MXS84H | QoRIKP | Forced expiratory volume in 1-second (FEV1), predicted percentage | class.Negativicutes.id.2164                   | Inverse variance weighted | 12.83734104 | 10 | 0.232909015 |
| 997  | mz9jd0 | QoRIKP | Forced expiratory volume in 1-second (FEV1), predicted percentage | genus.Barnesiella.id.944                      | MR Egger                  | 25.85618806 | 12 | 0.011248058 |
| 998  | mz9jd0 | QoRIKP | Forced expiratory volume in 1-second (FEV1), predicted percentage | genus.Barnesiella.id.944                      | Inverse variance weighted | 27.52609683 | 13 | 0.0105307   |
| 999  | n3j0op | QoRIKP | Forced expiratory volume in 1-second (FEV1), predicted percentage | class.Deltaproteobacteria.id.3087             | MR Egger                  | 19.32033754 | 11 | 0.055580191 |
| 1000 | n3j0op | QoRIKP | Forced expiratory volume in 1-second (FEV1), predicted percentage | class.Deltaproteobacteria.id.3087             | Inverse variance weighted | 19.83083815 | 12 | 0.070354367 |
| 1001 | nFIAu5 | QoRIKP | Forced expiratory volume in 1-second (FEV1), predicted percentage | family.Lachnospiraceae.id.1987                | MR Egger                  | 14.29491158 | 15 | 0.503290205 |
| 1002 | nFIAu5 | QoRIKP | Forced expiratory volume in 1-second (FEV1), predicted percentage | family.Lachnospiraceae.id.1987                | Inverse variance weighted | 14.40268714 | 16 | 0.568741607 |
| 1003 | nlesEv | QoRIKP | Forced expiratory volume in 1-second (FEV1), predicted percentage | genus.Peptococcus.id.2037                     | MR Egger                  | 14.61922892 | 10 | 0.146572999 |
| 1004 | nlesEv | QoRIKP | Forced expiratory volume in 1-second (FEV1), predicted percentage | genus.Peptococcus.id.2037                     | Inverse variance weighted | 19.22789376 | 11 | 0.057123416 |
| 1005 | NKNDGp | QoRIKP | Forced expiratory volume in 1-second (FEV1), predicted percentage | order.Methanobacteriales.id.120               | MR Egger                  | 10.59322616 | 6  | 0.101791675 |
| 1006 | NKNDGp | QoRIKP | Forced expiratory volume in 1-second (FEV1), predicted percentage | order.Methanobacteriales.id.120               | Inverse variance weighted | 12.18838822 | 7  | 0.094531354 |
| 1007 | nnD7ru | QoRIKP | Forced expiratory volume in 1-second (FEV1), predicted percentage | genus..Eubacteriumoxidoreducensgroup.id.11339 | MR Egger                  | 2.230822623 | 3  | 0.52590282  |
| 1008 | nnD7ru | QoRIKP | Forced expiratory volume in 1-second (FEV1), predicted percentage | genus..Eubacteriumoxidoreducensgroup.id.11339 | Inverse variance weighted | 3.337407096 | 4  | 0.50302734  |
| 1009 | NqdTjG | QoRIKP | Forced expiratory volume in 1-second (FEV1), predicted percentage | genus.FamilyXIIID3011group.id.11293           | MR Egger                  | 10.98940245 | 9  | 0.276436046 |
| 1010 | NqdTjG | QoRIKP | Forced expiratory volume in 1-second (FEV1), predicted percentage | genus.FamilyXIIID3011group.id.11293           | Inverse variance weighted | 12.93155299 | 10 | 0.227523991 |
| 1011 | nQHoYD | QoRIKP | Forced expiratory volume in 1-second (FEV1), predicted percentage | class.Lentisphaeria.id.2250                   | MR Egger                  | 8.193229005 | 6  | 0.224285968 |
| 1012 | nQHoYD | QoRIKP | Forced expiratory volume in 1-second (FEV1), predicted percentage | class.Lentisphaeria.id.2250                   | Inverse variance weighted | 10.67908    | 7  | 0.153242882 |
| 1013 | nRNBx9 | QoRIKP | Forced expiratory volume in 1-second (FEV1), predicted percentage | class.Mollicutes.id.3920                      | MR Egger                  | 22.88211432 | 10 | 0.011190178 |
| 1014 | nRNBx9 | QoRIKP | Forced expiratory volume in 1-second (FEV1), predicted percentage | class.Mollicutes.id.3920                      | Inverse variance weighted | 23.43467952 | 11 | 0.015338908 |
| 1015 | O0n2Pz | QoRIKP | Forced expiratory volume in 1-second (FEV1), predicted percentage | family.Bacteroidaceae.id.917                  | MR Egger                  | 1.915507067 | 7  | 0.964368377 |
| 1016 | O0n2Pz | QoRIKP | Forced expiratory volume in 1-second (FEV1), predicted percentage | family.Bacteroidaceae.id.917                  | Inverse variance weighted | 2.447047799 | 8  | 0.964154446 |
| 1017 | obtxsV | QoRIKP | Forced expiratory volume in 1-second (FEV1), predicted percentage | family.Veillonellaceae.id.2172                | MR Egger                  | 22.760571   | 17 | 0.157208863 |
| 1018 | obtxsV | QoRIKP | Forced expiratory volume in 1-second (FEV1), predicted percentage | family.Veillonellaceae.id.2172                | Inverse variance weighted | 24.58483229 | 18 | 0.136785811 |
| 1019 | oChqj7 | QoRIKP | Forced expiratory volume in 1-second (FEV1), predicted percentage | phylum.Bacteroidetes.id.905                   | MR Egger                  | 7.7411053   | 7  | 0.355975685 |
| 1020 | oChqj7 | QoRIKP | Forced expiratory volume in 1-second (FEV1), predicted percentage | phylum.Bacteroidetes.id.905                   | Inverse variance weighted | 7.897994655 | 8  | 0.443497323 |

|      | A      | B      | C                                                                 | D                                                 | E                         | F           | G  | H           |
|------|--------|--------|-------------------------------------------------------------------|---------------------------------------------------|---------------------------|-------------|----|-------------|
| 1021 | oGD8An | QoRIKP | Forced expiratory volume in 1-second (FEV1), predicted percentage | order.Coriobacteriales.id.810                     | MR Egger                  | 18.99009749 | 12 | 0.088767705 |
| 1022 | oGD8An | QoRIKP | Forced expiratory volume in 1-second (FEV1), predicted percentage | order.Coriobacteriales.id.810                     | Inverse variance weighted | 19.24148775 | 13 | 0.115804517 |
| 1023 | OhSZ6N | QoRIKP | Forced expiratory volume in 1-second (FEV1), predicted percentage | genus.RuminococcaceaeUCG002.id.11360              | MR Egger                  | 14.97492912 | 18 | 0.663687868 |
| 1024 | OhSZ6N | QoRIKP | Forced expiratory volume in 1-second (FEV1), predicted percentage | genus.RuminococcaceaeUCG002.id.11360              | Inverse variance weighted | 15.42662547 | 19 | 0.695123916 |
| 1025 | olDISu | QoRIKP | Forced expiratory volume in 1-second (FEV1), predicted percentage | genus..Eubacteriumnodatumgroup.id.11297           | MR Egger                  | 10.7772664  | 9  | 0.291285755 |
| 1026 | olDISu | QoRIKP | Forced expiratory volume in 1-second (FEV1), predicted percentage | genus..Eubacteriumnodatumgroup.id.11297           | Inverse variance weighted | 11.07519959 | 10 | 0.351689365 |
| 1027 | OtCSo3 | QoRIKP | Forced expiratory volume in 1-second (FEV1), predicted percentage | genus.Alloprevotella.id.961                       | MR Egger                  | 2.823239744 | 4  | 0.587827816 |
| 1028 | OtCSo3 | QoRIKP | Forced expiratory volume in 1-second (FEV1), predicted percentage | genus.Alloprevotella.id.961                       | Inverse variance weighted | 3.816151789 | 5  | 0.576177607 |
| 1029 | oU56W6 | QoRIKP | Forced expiratory volume in 1-second (FEV1), predicted percentage | family.Peptostreptococcaceae.id.2042              | MR Egger                  | 4.438399837 | 11 | 0.955297489 |
| 1030 | oU56W6 | QoRIKP | Forced expiratory volume in 1-second (FEV1), predicted percentage | family.Peptostreptococcaceae.id.2042              | Inverse variance weighted | 4.611595375 | 12 | 0.969711474 |
| 1031 | Oxkiqb | QoRIKP | Forced expiratory volume in 1-second (FEV1), predicted percentage | order.Clostridiales.id.1863                       | MR Egger                  | 15.53585016 | 11 | 0.159255522 |
| 1032 | Oxkiqb | QoRIKP | Forced expiratory volume in 1-second (FEV1), predicted percentage | order.Clostridiales.id.1863                       | Inverse variance weighted | 15.88635388 | 12 | 0.196496893 |
| 1033 | P9709V | QoRIKP | Forced expiratory volume in 1-second (FEV1), predicted percentage | genus..Eubacteriumhalliigroup.id.11338            | MR Egger                  | 16.80213975 | 14 | 0.266875319 |
| 1034 | P9709V | QoRIKP | Forced expiratory volume in 1-second (FEV1), predicted percentage | genus..Eubacteriumhalliigroup.id.11338            | Inverse variance weighted | 18.53909492 | 15 | 0.235384378 |
| 1035 | PcT6eJ | QoRIKP | Forced expiratory volume in 1-second (FEV1), predicted percentage | phylum.Cyanobacteria.id.1500                      | MR Egger                  | 6.168067469 | 6  | 0.404629006 |
| 1036 | PcT6eJ | QoRIKP | Forced expiratory volume in 1-second (FEV1), predicted percentage | phylum.Cyanobacteria.id.1500                      | Inverse variance weighted | 6.81647755  | 7  | 0.448235209 |
| 1037 | pCXx5P | QoRIKP | Forced expiratory volume in 1-second (FEV1), predicted percentage | genus.Phascolarctobacterium.id.2168               | MR Egger                  | 4.840526126 | 8  | 0.774477049 |
| 1038 | pCXx5P | QoRIKP | Forced expiratory volume in 1-second (FEV1), predicted percentage | genus.Phascolarctobacterium.id.2168               | Inverse variance weighted | 4.986154143 | 9  | 0.835513563 |
| 1039 | PGIGHi | QoRIKP | Forced expiratory volume in 1-second (FEV1), predicted percentage | genus.LachnospiraceaeUCG008.id.11328              | MR Egger                  | 7.72200104  | 8  | 0.461086232 |
| 1040 | PGIGHi | QoRIKP | Forced expiratory volume in 1-second (FEV1), predicted percentage | genus.LachnospiraceaeUCG008.id.11328              | Inverse variance weighted | 7.729647869 | 9  | 0.56160406  |
| 1041 | pXAgfu | QoRIKP | Forced expiratory volume in 1-second (FEV1), predicted percentage | family.Acidaminococcaceae.id.2166                 | MR Egger                  | 9.920775262 | 5  | 0.07751142  |
| 1042 | pXAgfu | QoRIKP | Forced expiratory volume in 1-second (FEV1), predicted percentage | family.Acidaminococcaceae.id.2166                 | Inverse variance weighted | 12.3154729  | 6  | 0.055289874 |
| 1043 | q1b0SE | QoRIKP | Forced expiratory volume in 1-second (FEV1), predicted percentage | genus.Lactobacillus.id.1837                       | MR Egger                  | 6.789943863 | 5  | 0.236737025 |
| 1044 | q1b0SE | QoRIKP | Forced expiratory volume in 1-second (FEV1), predicted percentage | genus.Lactobacillus.id.1837                       | Inverse variance weighted | 7.396762186 | 6  | 0.285707187 |
| 1045 | Q3dvBY | QoRIKP | Forced expiratory volume in 1-second (FEV1), predicted percentage | genus.Methanobrevibacter.id.123                   | MR Egger                  | 1.582116206 | 3  | 0.663451614 |
| 1046 | Q3dvBY | QoRIKP | Forced expiratory volume in 1-second (FEV1), predicted percentage | genus.Methanobrevibacter.id.123                   | Inverse variance weighted | 3.751472114 | 4  | 0.44068392  |
| 1047 | Q46NVk | QoRIKP | Forced expiratory volume in 1-second (FEV1), predicted percentage | genus.Intestinibacter.id.11345                    | MR Egger                  | 10.01645455 | 12 | 0.61451704  |
| 1048 | Q46NVk | QoRIKP | Forced expiratory volume in 1-second (FEV1), predicted percentage | genus.Intestinibacter.id.11345                    | Inverse variance weighted | 10.03304676 | 13 | 0.691229809 |
| 1049 | qE3Gq8 | QoRIKP | Forced expiratory volume in 1-second (FEV1), predicted percentage | genus..Ruminococcustorquesgroup.id.14377          | MR Egger                  | 3.93774914  | 7  | 0.786918959 |
| 1050 | qE3Gq8 | QoRIKP | Forced expiratory volume in 1-second (FEV1), predicted percentage | genus..Ruminococcustorquesgroup.id.14377          | Inverse variance weighted | 3.953962334 | 8  | 0.861253055 |
| 1051 | qENaoR | QoRIKP | Forced expiratory volume in 1-second (FEV1), predicted percentage | genus.Victivallis.id.2256                         | MR Egger                  | 9.731107645 | 8  | 0.284408144 |
| 1052 | qENaoR | QoRIKP | Forced expiratory volume in 1-second (FEV1), predicted percentage | genus.Victivallis.id.2256                         | Inverse variance weighted | 9.763522734 | 9  | 0.369966536 |
| 1053 | QGrGNV | QoRIKP | Forced expiratory volume in 1-second (FEV1), predicted percentage | genus.Haemophilus.id.3698                         | MR Egger                  | 7.06579936  | 7  | 0.422061191 |
| 1054 | QGrGNV | QoRIKP | Forced expiratory volume in 1-second (FEV1), predicted percentage | genus.Haemophilus.id.3698                         | Inverse variance weighted | 11.27229048 | 8  | 0.186742989 |
| 1055 | qiWbrh | QoRIKP | Forced expiratory volume in 1-second (FEV1), predicted percentage | order.Selenomonadales.id.2165                     | MR Egger                  | 12.82781462 | 9  | 0.170553503 |
| 1056 | qiWbrh | QoRIKP | Forced expiratory volume in 1-second (FEV1), predicted percentage | order.Selenomonadales.id.2165                     | Inverse variance weighted | 12.83734104 | 10 | 0.232909015 |
| 1057 | QjakFr | QoRIKP | Forced expiratory volume in 1-second (FEV1), predicted percentage | genus.LachnospiraceaeFCS020group.id.11314         | MR Egger                  | 5.906736147 | 10 | 0.823037029 |
| 1058 | QjakFr | QoRIKP | Forced expiratory volume in 1-second (FEV1), predicted percentage | genus.LachnospiraceaeFCS020group.id.11314         | Inverse variance weighted | 5.918250261 | 11 | 0.878762725 |
| 1059 | Qyd7XB | QoRIKP | Forced expiratory volume in 1-second (FEV1), predicted percentage | genus..Eubacteriumxylanophilumgroup.id.14375      | MR Egger                  | 17.83440053 | 7  | 0.012739918 |
| 1060 | Qyd7XB | QoRIKP | Forced expiratory volume in 1-second (FEV1), predicted percentage | genus..Eubacteriumxylanophilumgroup.id.14375      | Inverse variance weighted | 19.15211393 | 8  | 0.014066971 |
| 1061 | R6RQXL | QoRIKP | Forced expiratory volume in 1-second (FEV1), predicted percentage | genus..Ruminococcusgnavusgroup.id.14376           | MR Egger                  | 12.58127291 | 9  | 0.182486318 |
| 1062 | R6RQXL | QoRIKP | Forced expiratory volume in 1-second (FEV1), predicted percentage | genus..Ruminococcusgnavusgroup.id.14376           | Inverse variance weighted | 13.86971547 | 10 | 0.179017668 |
| 1063 | R7oLoV | QoRIKP | Forced expiratory volume in 1-second (FEV1), predicted percentage | genus.RuminococcaceaeUCG011.id.11368              | MR Egger                  | 2.390276292 | 5  | 0.792921287 |
| 1064 | R7oLoV | QoRIKP | Forced expiratory volume in 1-second (FEV1), predicted percentage | genus.RuminococcaceaeUCG011.id.11368              | Inverse variance weighted | 3.984134325 | 6  | 0.67882359  |
| 1065 | RKITkD | QoRIKP | Forced expiratory volume in 1-second (FEV1), predicted percentage | genus.Bifidobacterium.id.436                      | MR Egger                  | 26.90282869 | 9  | 0.001451478 |
| 1066 | RKITkD | QoRIKP | Forced expiratory volume in 1-second (FEV1), predicted percentage | genus.Bifidobacterium.id.436                      | Inverse variance weighted | 28.42511156 | 10 | 0.001542805 |
| 1067 | rlb7o5 | QoRIKP | Forced expiratory volume in 1-second (FEV1), predicted percentage | genus..Eubacteriumcoprostanoligenesgroup.id.11375 | MR Egger                  | 21.64943583 | 11 | 0.027234181 |
| 1068 | rlb7o5 | QoRIKP | Forced expiratory volume in 1-second (FEV1), predicted percentage | genus..Eubacteriumcoprostanoligenesgroup.id.11375 | Inverse variance weighted | 22.31411443 | 12 | 0.03414648  |
| 1069 | RmoHnu | QoRIKP | Forced expiratory volume in 1-second (FEV1), predicted percentage | genus.Ruminiclostridium9.id.11357                 | MR Egger                  | 4.758512045 | 7  | 0.689405457 |
| 1070 | RmoHnu | QoRIKP | Forced expiratory volume in 1-second (FEV1), predicted percentage | genus.Ruminiclostridium9.id.11357                 | Inverse variance weighted | 4.863005499 | 8  | 0.77211296  |
| 1071 | rsbOlb | QoRIKP | Forced expiratory volume in 1-second (FEV1), predicted percentage | order.MollicutesRF9.id.11579                      | MR Egger                  | 21.92368215 | 11 | 0.024971199 |

|      | A      | B      | C                                                                 | D                                           | E                         | F           | G  | H           |
|------|--------|--------|-------------------------------------------------------------------|---------------------------------------------|---------------------------|-------------|----|-------------|
| 1072 | rsbOlb | QoRIKP | Forced expiratory volume in 1-second (FEV1), predicted percentage | order.MollicutesRF9.id.11579                | Inverse variance weighted | 22.4923654  | 12 | 0.032358093 |
| 1073 | Rv99Lm | QoRIKP | Forced expiratory volume in 1-second (FEV1), predicted percentage | genus..Eubacteriumbrachygroup.id.11296      | MR Egger                  | 8.7477977   | 8  | 0.36401621  |
| 1074 | Rv99Lm | QoRIKP | Forced expiratory volume in 1-second (FEV1), predicted percentage | genus..Eubacteriumbrachygroup.id.11296      | Inverse variance weighted | 8.74787133  | 9  | 0.460865985 |
| 1075 | sF7W2L | QoRIKP | Forced expiratory volume in 1-second (FEV1), predicted percentage | genus.Howardella.id.2000                    | MR Egger                  | 15.18732158 | 8  | 0.055603833 |
| 1076 | sF7W2L | QoRIKP | Forced expiratory volume in 1-second (FEV1), predicted percentage | genus.Howardella.id.2000                    | Inverse variance weighted | 15.21216333 | 9  | 0.085270654 |
| 1077 | sFxDb3 | QoRIKP | Forced expiratory volume in 1-second (FEV1), predicted percentage | order.Burkholderiales.id.2874               | MR Egger                  | 17.95572326 | 8  | 0.021560896 |
| 1078 | sFxDb3 | QoRIKP | Forced expiratory volume in 1-second (FEV1), predicted percentage | order.Burkholderiales.id.2874               | Inverse variance weighted | 18.01967256 | 9  | 0.034945988 |
| 1079 | Sgv0J4 | QoRIKP | Forced expiratory volume in 1-second (FEV1), predicted percentage | family.Victivallaceae.id.2255               | MR Egger                  | 16.1841521  | 10 | 0.094480788 |
| 1080 | Sgv0J4 | QoRIKP | Forced expiratory volume in 1-second (FEV1), predicted percentage | family.Victivallaceae.id.2255               | Inverse variance weighted | 17.68964668 | 11 | 0.089066928 |
| 1081 | Sp09Ka | QoRIKP | Forced expiratory volume in 1-second (FEV1), predicted percentage | family.Porphyromonadaceae.id.943            | MR Egger                  | 6.358058223 | 7  | 0.498617041 |
| 1082 | Sp09Ka | QoRIKP | Forced expiratory volume in 1-second (FEV1), predicted percentage | family.Porphyromonadaceae.id.943            | Inverse variance weighted | 7.909241364 | 8  | 0.442385635 |
| 1083 | staWrf | QoRIKP | Forced expiratory volume in 1-second (FEV1), predicted percentage | order.Rhodospirillales.id.2667              | MR Egger                  | 12.33224891 | 11 | 0.3391943   |
| 1084 | staWrf | QoRIKP | Forced expiratory volume in 1-second (FEV1), predicted percentage | order.Rhodospirillales.id.2667              | Inverse variance weighted | 13.26602205 | 12 | 0.350005286 |
| 1085 | szt6bn | QoRIKP | Forced expiratory volume in 1-second (FEV1), predicted percentage | class.Coriobacteriia.id.809                 | MR Egger                  | 18.99009749 | 12 | 0.088767705 |
| 1086 | szt6bn | QoRIKP | Forced expiratory volume in 1-second (FEV1), predicted percentage | class.Coriobacteriia.id.809                 | Inverse variance weighted | 19.24148775 | 13 | 0.115804517 |
| 1087 | T35lgz | QoRIKP | Forced expiratory volume in 1-second (FEV1), predicted percentage | family.Oxalobacteraceae.id.2966             | MR Egger                  | 16.19918666 | 12 | 0.182282348 |
| 1088 | T35lgz | QoRIKP | Forced expiratory volume in 1-second (FEV1), predicted percentage | family.Oxalobacteraceae.id.2966             | Inverse variance weighted | 16.32829193 | 13 | 0.231855769 |
| 1089 | T8T6Lu | QoRIKP | Forced expiratory volume in 1-second (FEV1), predicted percentage | family.Peptococcaceae.id.2024               | MR Egger                  | 9.222970675 | 7  | 0.237041682 |
| 1090 | T8T6Lu | QoRIKP | Forced expiratory volume in 1-second (FEV1), predicted percentage | family.Peptococcaceae.id.2024               | Inverse variance weighted | 24.5241886  | 8  | 0.001870839 |
| 1091 | tbXTaX | QoRIKP | Forced expiratory volume in 1-second (FEV1), predicted percentage | genus.ChristensenellaceaeR.7group.id.11283  | MR Egger                  | 23.108692   | 8  | 0.003227465 |
| 1092 | tbXTaX | QoRIKP | Forced expiratory volume in 1-second (FEV1), predicted percentage | genus.ChristensenellaceaeR.7group.id.11283  | Inverse variance weighted | 23.4877598  | 9  | 0.005189014 |
| 1093 | TGrzdF | QoRIKP | Forced expiratory volume in 1-second (FEV1), predicted percentage | genus..Eubacteriumfissicatenagroup.id.14373 | MR Egger                  | 8.859828097 | 6  | 0.181616062 |
| 1094 | TGrzdF | QoRIKP | Forced expiratory volume in 1-second (FEV1), predicted percentage | genus..Eubacteriumfissicatenagroup.id.14373 | Inverse variance weighted | 10.57888783 | 7  | 0.158071648 |
| 1095 | tkl5vG | QoRIKP | Forced expiratory volume in 1-second (FEV1), predicted percentage | genus.Slackia.id.825                        | MR Egger                  | 3.668411967 | 4  | 0.45273688  |
| 1096 | tkl5vG | QoRIKP | Forced expiratory volume in 1-second (FEV1), predicted percentage | genus.Slackia.id.825                        | Inverse variance weighted | 3.670831011 | 5  | 0.59771067  |
| 1097 | TIODZI | QoRIKP | Forced expiratory volume in 1-second (FEV1), predicted percentage | genus.RuminococcaceaeUCG004.id.11362        | MR Egger                  | 13.70821575 | 7  | 0.056621154 |
| 1098 | TIODZI | QoRIKP | Forced expiratory volume in 1-second (FEV1), predicted percentage | genus.RuminococcaceaeUCG004.id.11362        | Inverse variance weighted | 15.36141614 | 8  | 0.052487383 |
| 1099 | TQSPiB | QoRIKP | Forced expiratory volume in 1-second (FEV1), predicted percentage | genus.LachnospiraceaeUCG004.id.11324        | MR Egger                  | 27.41015337 | 9  | 0.001196074 |
| 1100 | TQSPiB | QoRIKP | Forced expiratory volume in 1-second (FEV1), predicted percentage | genus.LachnospiraceaeUCG004.id.11324        | Inverse variance weighted | 27.82626013 | 10 | 0.001924532 |
| 1101 | tSlIO9 | QoRIKP | Forced expiratory volume in 1-second (FEV1), predicted percentage | order.Bacteroidales.id.913                  | MR Egger                  | 11.06190462 | 9  | 0.271489555 |
| 1102 | tSlIO9 | QoRIKP | Forced expiratory volume in 1-second (FEV1), predicted percentage | order.Bacteroidales.id.913                  | Inverse variance weighted | 11.14200282 | 10 | 0.346562279 |
| 1103 | TUj4LC | QoRIKP | Forced expiratory volume in 1-second (FEV1), predicted percentage | genus.LachnospiraceaeNC2004group.id.11316   | MR Egger                  | 4.520737633 | 7  | 0.718218695 |
| 1104 | TUj4LC | QoRIKP | Forced expiratory volume in 1-second (FEV1), predicted percentage | genus.LachnospiraceaeNC2004group.id.11316   | Inverse variance weighted | 7.489389476 | 8  | 0.484864554 |
| 1105 | uCOF7P | QoRIKP | Forced expiratory volume in 1-second (FEV1), predicted percentage | order.Bacillales.id.1674                    | MR Egger                  | 10.01139771 | 6  | 0.124172857 |
| 1106 | uCOF7P | QoRIKP | Forced expiratory volume in 1-second (FEV1), predicted percentage | order.Bacillales.id.1674                    | Inverse variance weighted | 10.56264558 | 7  | 0.158866559 |
| 1107 | uHEy8Q | QoRIKP | Forced expiratory volume in 1-second (FEV1), predicted percentage | genus.Akkermansia.id.4037                   | MR Egger                  | 13.33847533 | 9  | 0.147879128 |
| 1108 | uHEy8Q | QoRIKP | Forced expiratory volume in 1-second (FEV1), predicted percentage | genus.Akkermansia.id.4037                   | Inverse variance weighted | 13.45985413 | 10 | 0.19908465  |
| 1109 | uQYGEB | QoRIKP | Forced expiratory volume in 1-second (FEV1), predicted percentage | genus.Parabacteroides.id.954                | MR Egger                  | 3.282659295 | 4  | 0.511684424 |
| 1110 | uQYGEB | QoRIKP | Forced expiratory volume in 1-second (FEV1), predicted percentage | genus.Parabacteroides.id.954                | Inverse variance weighted | 3.407567246 | 5  | 0.637417672 |
| 1111 | UsMxlz | QoRIKP | Forced expiratory volume in 1-second (FEV1), predicted percentage | class.Verrucomicrobiae.id.4029              | MR Egger                  | 13.33979916 | 9  | 0.1478238   |
| 1112 | UsMxlz | QoRIKP | Forced expiratory volume in 1-second (FEV1), predicted percentage | class.Verrucomicrobiae.id.4029              | Inverse variance weighted | 13.46896235 | 10 | 0.198620068 |
| 1113 | UTPK2n | QoRIKP | Forced expiratory volume in 1-second (FEV1), predicted percentage | class.Bacteroidia.id.912                    | MR Egger                  | 11.06190462 | 9  | 0.271489555 |
| 1114 | UTPK2n | QoRIKP | Forced expiratory volume in 1-second (FEV1), predicted percentage | class.Bacteroidia.id.912                    | Inverse variance weighted | 11.14200282 | 10 | 0.346562279 |
| 1115 | UYJxH8 | QoRIKP | Forced expiratory volume in 1-second (FEV1), predicted percentage | genus.Butyrivibrio.id.1993                  | MR Egger                  | 17.35878689 | 13 | 0.183417173 |
| 1116 | UYJxH8 | QoRIKP | Forced expiratory volume in 1-second (FEV1), predicted percentage | genus.Butyrivibrio.id.1993                  | Inverse variance weighted | 20.14662049 | 14 | 0.125586171 |
| 1117 | Vd8Fsi | QoRIKP | Forced expiratory volume in 1-second (FEV1), predicted percentage | genus.Bacteroides.id.918                    | MR Egger                  | 1.915507067 | 7  | 0.964368377 |
| 1118 | Vd8Fsi | QoRIKP | Forced expiratory volume in 1-second (FEV1), predicted percentage | genus.Bacteroides.id.918                    | Inverse variance weighted | 2.447047799 | 8  | 0.964154446 |
| 1119 | vlyGOP | QoRIKP | Forced expiratory volume in 1-second (FEV1), predicted percentage | family.Ruminococcaceae.id.2050              | MR Egger                  | 13.97952163 | 8  | 0.082300741 |
| 1120 | vlyGOP | QoRIKP | Forced expiratory volume in 1-second (FEV1), predicted percentage | family.Ruminococcaceae.id.2050              | Inverse variance weighted | 14.00040501 | 9  | 0.122310822 |
| 1121 | W49IoY | QoRIKP | Forced expiratory volume in 1-second (FEV1), predicted percentage | genus.Olsenella.id.822                      | MR Egger                  | 8.981162219 | 9  | 0.439014904 |
| 1122 | W49IoY | QoRIKP | Forced expiratory volume in 1-second (FEV1), predicted percentage | genus.Olsenella.id.822                      | Inverse variance weighted | 10.90647333 | 10 | 0.364850917 |

|      | A      | B      | C                                                                 | D                                         | E                         | F           | G  | H           |
|------|--------|--------|-------------------------------------------------------------------|-------------------------------------------|---------------------------|-------------|----|-------------|
| 1123 | w5yhuV | QoRiKP | Forced expiratory volume in 1-second (FEV1), predicted percentage | genus.Romboutsia.id.11347                 | MR Egger                  | 11.49189765 | 11 | 0.403019705 |
| 1124 | w5yhuV | QoRiKP | Forced expiratory volume in 1-second (FEV1), predicted percentage | genus.Romboutsia.id.11347                 | Inverse variance weighted | 14.24794424 | 12 | 0.285156095 |
| 1125 | WaNFee | QoRiKP | Forced expiratory volume in 1-second (FEV1), predicted percentage | genus.Desulfovibrio.id.3173               | MR Egger                  | 14.46256214 | 8  | 0.0704775   |
| 1126 | WaNFee | QoRiKP | Forced expiratory volume in 1-second (FEV1), predicted percentage | genus.Desulfovibrio.id.3173               | Inverse variance weighted | 14.5083573  | 9  | 0.105356313 |
| 1127 | WcT5pC | QoRiKP | Forced expiratory volume in 1-second (FEV1), predicted percentage | genus.Anaerofilum.id.2053                 | MR Egger                  | 3.870973624 | 9  | 0.919697505 |
| 1128 | WcT5pC | QoRiKP | Forced expiratory volume in 1-second (FEV1), predicted percentage | genus.Anaerofilum.id.2053                 | Inverse variance weighted | 6.117026615 | 10 | 0.805337169 |
| 1129 | WEMGli | QoRiKP | Forced expiratory volume in 1-second (FEV1), predicted percentage | family.Alcaligenaceae.id.2875             | MR Egger                  | 15.77434314 | 8  | 0.045726219 |
| 1130 | WEMGli | QoRiKP | Forced expiratory volume in 1-second (FEV1), predicted percentage | family.Alcaligenaceae.id.2875             | Inverse variance weighted | 16.50338399 | 9  | 0.057085205 |
| 1131 | wFbL6J | QoRiKP | Forced expiratory volume in 1-second (FEV1), predicted percentage | genus.Marvinbryantia.id.2005              | MR Egger                  | 17.19428805 | 8  | 0.028148372 |
| 1132 | wFbL6J | QoRiKP | Forced expiratory volume in 1-second (FEV1), predicted percentage | genus.Marvinbryantia.id.2005              | Inverse variance weighted | 17.5220269  | 9  | 0.041141689 |
| 1133 | wF1Yn  | QoRiKP | Forced expiratory volume in 1-second (FEV1), predicted percentage | genus.LachnospiraceaeUCG001.id.11321      | MR Egger                  | 7.726168691 | 11 | 0.737602966 |
| 1134 | wF1Yn  | QoRiKP | Forced expiratory volume in 1-second (FEV1), predicted percentage | genus.LachnospiraceaeUCG001.id.11321      | Inverse variance weighted | 8.140308001 | 12 | 0.774071883 |
| 1135 | wJFco0 | QoRiKP | Forced expiratory volume in 1-second (FEV1), predicted percentage | genus.Veillonella.id.2198                 | MR Egger                  | 8.728675931 | 6  | 0.189421923 |
| 1136 | wJFco0 | QoRiKP | Forced expiratory volume in 1-second (FEV1), predicted percentage | genus.Veillonella.id.2198                 | Inverse variance weighted | 8.729911966 | 7  | 0.272633291 |
| 1137 | wn5rK2 | QoRiKP | Forced expiratory volume in 1-second (FEV1), predicted percentage | genus.ErysipelotrichaceaeUCG003.id.11384  | MR Egger                  | 15.3076445  | 14 | 0.357453142 |
| 1138 | wn5rK2 | QoRiKP | Forced expiratory volume in 1-second (FEV1), predicted percentage | genus.ErysipelotrichaceaeUCG003.id.11384  | Inverse variance weighted | 15.64947811 | 15 | 0.405722114 |
| 1139 | wQYhwp | QoRiKP | Forced expiratory volume in 1-second (FEV1), predicted percentage | genus.Odoribacter.id.952                  | MR Egger                  | 13.54787284 | 5  | 0.018751376 |
| 1140 | wQYhwp | QoRiKP | Forced expiratory volume in 1-second (FEV1), predicted percentage | genus.Odoribacter.id.952                  | Inverse variance weighted | 16.51038889 | 6  | 0.011261504 |
| 1141 | WvdQyb | QoRiKP | Forced expiratory volume in 1-second (FEV1), predicted percentage | genus..Eubacteriumeligensgroup.id.14372   | MR Egger                  | 1.80478094  | 5  | 0.875443672 |
| 1142 | WvdQyb | QoRiKP | Forced expiratory volume in 1-second (FEV1), predicted percentage | genus..Eubacteriumeligensgroup.id.14372   | Inverse variance weighted | 1.842081564 | 6  | 0.933634179 |
| 1143 | X4kHrP | QoRiKP | Forced expiratory volume in 1-second (FEV1), predicted percentage | class.Betaproteobacteria.id.2867          | MR Egger                  | 17.61665415 | 10 | 0.061784846 |
| 1144 | X4kHrP | QoRiKP | Forced expiratory volume in 1-second (FEV1), predicted percentage | class.Betaproteobacteria.id.2867          | Inverse variance weighted | 18.13490842 | 11 | 0.07850259  |
| 1145 | xCuklr | QoRiKP | Forced expiratory volume in 1-second (FEV1), predicted percentage | genus.Dialister.id.2183                   | MR Egger                  | 15.43811769 | 8  | 0.051165883 |
| 1146 | xCuklr | QoRiKP | Forced expiratory volume in 1-second (FEV1), predicted percentage | genus.Dialister.id.2183                   | Inverse variance weighted | 15.50953696 | 9  | 0.077857463 |
| 1147 | Xtktja | QoRiKP | Forced expiratory volume in 1-second (FEV1), predicted percentage | family.Pasteurellaceae.id.3689            | MR Egger                  | 11.99024965 | 12 | 0.446463025 |
| 1148 | Xtktja | QoRiKP | Forced expiratory volume in 1-second (FEV1), predicted percentage | family.Pasteurellaceae.id.3689            | Inverse variance weighted | 18.20069703 | 13 | 0.150046725 |
| 1149 | XTu0EY | QoRiKP | Forced expiratory volume in 1-second (FEV1), predicted percentage | genus.Intestinimonas.id.2062              | MR Egger                  | 15.8708114  | 14 | 0.321327233 |
| 1150 | XTu0EY | QoRiKP | Forced expiratory volume in 1-second (FEV1), predicted percentage | genus.Intestinimonas.id.2062              | Inverse variance weighted | 15.97073207 | 15 | 0.383999499 |
| 1151 | XVFzMF | QoRiKP | Forced expiratory volume in 1-second (FEV1), predicted percentage | genus.Holdemania.id.2157                  | MR Egger                  | 23.70461621 | 12 | 0.022305899 |
| 1152 | XVFzMF | QoRiKP | Forced expiratory volume in 1-second (FEV1), predicted percentage | genus.Holdemania.id.2157                  | Inverse variance weighted | 24.02514077 | 13 | 0.03089959  |
| 1153 | y0FJ9U | QoRiKP | Forced expiratory volume in 1-second (FEV1), predicted percentage | genus.LachnospiraceaeND3007group.id.11317 | MR Egger                  | 0.002955232 | 1  | 0.956646714 |
| 1154 | y0FJ9U | QoRiKP | Forced expiratory volume in 1-second (FEV1), predicted percentage | genus.LachnospiraceaeND3007group.id.11317 | Inverse variance weighted | 2.173206891 | 2  | 0.337360413 |
| 1155 | Y7cF3n | QoRiKP | Forced expiratory volume in 1-second (FEV1), predicted percentage | family.Methanobacteriaceae.id.121         | MR Egger                  | 10.59322616 | 6  | 0.101791675 |
| 1156 | Y7cF3n | QoRiKP | Forced expiratory volume in 1-second (FEV1), predicted percentage | family.Methanobacteriaceae.id.121         | Inverse variance weighted | 12.18838822 | 7  | 0.094531354 |
| 1157 | yakWtY | QoRiKP | Forced expiratory volume in 1-second (FEV1), predicted percentage | genus.Butyricoccus.id.2055                | MR Egger                  | 9.641421995 | 6  | 0.140587503 |
| 1158 | yakWtY | QoRiKP | Forced expiratory volume in 1-second (FEV1), predicted percentage | genus.Butyricoccus.id.2055                | Inverse variance weighted | 12.66453387 | 7  | 0.080716213 |
| 1159 | yerINC | QoRiKP | Forced expiratory volume in 1-second (FEV1), predicted percentage | genus.RuminococcaceaeUCG005.id.11363      | MR Egger                  | 27.09946784 | 12 | 0.007476367 |
| 1160 | yerINC | QoRiKP | Forced expiratory volume in 1-second (FEV1), predicted percentage | genus.RuminococcaceaeUCG005.id.11363      | Inverse variance weighted | 28.08250151 | 13 | 0.008813041 |
| 1161 | yfxdv6 | QoRiKP | Forced expiratory volume in 1-second (FEV1), predicted percentage | family.Erysipelotrichaceae.id.2149        | MR Egger                  | 9.343930252 | 11 | 0.590178539 |
| 1162 | yfxdv6 | QoRiKP | Forced expiratory volume in 1-second (FEV1), predicted percentage | family.Erysipelotrichaceae.id.2149        | Inverse variance weighted | 9.885045119 | 12 | 0.626044953 |
| 1163 | ygbSF7 | QoRiKP | Forced expiratory volume in 1-second (FEV1), predicted percentage | genus.Fusicatenibacter.id.11305           | MR Egger                  | 24.78339807 | 16 | 0.073736041 |
| 1164 | ygbSF7 | QoRiKP | Forced expiratory volume in 1-second (FEV1), predicted percentage | genus.Fusicatenibacter.id.11305           | Inverse variance weighted | 25.47574197 | 17 | 0.084556386 |
| 1165 | ylev3A | QoRiKP | Forced expiratory volume in 1-second (FEV1), predicted percentage | family.FamilyXIII.id.1957                 | MR Egger                  | 13.25397754 | 8  | 0.103404688 |
| 1166 | ylev3A | QoRiKP | Forced expiratory volume in 1-second (FEV1), predicted percentage | family.FamilyXIII.id.1957                 | Inverse variance weighted | 13.37540766 | 9  | 0.146342106 |
| 1167 | yLt27i | QoRiKP | Forced expiratory volume in 1-second (FEV1), predicted percentage | genus.Senegalimassilia.id.11160           | MR Egger                  | 1.258648889 | 3  | 0.738974926 |
| 1168 | yLt27i | QoRiKP | Forced expiratory volume in 1-second (FEV1), predicted percentage | genus.Senegalimassilia.id.11160           | Inverse variance weighted | 1.483599586 | 4  | 0.82954257  |
| 1169 | YXZeGZ | QoRiKP | Forced expiratory volume in 1-second (FEV1), predicted percentage | genus.Alistipes.id.968                    | MR Egger                  | 28.20346626 | 12 | 0.005165058 |
| 1170 | YXZeGZ | QoRiKP | Forced expiratory volume in 1-second (FEV1), predicted percentage | genus.Alistipes.id.968                    | Inverse variance weighted | 28.46085276 | 13 | 0.007800246 |
| 1171 | YYHfMs | QoRiKP | Forced expiratory volume in 1-second (FEV1), predicted percentage | genus.Gordonibacter.id.821                | MR Egger                  | 4.678222628 | 9  | 0.861408283 |
| 1172 | YYHfMs | QoRiKP | Forced expiratory volume in 1-second (FEV1), predicted percentage | genus.Gordonibacter.id.821                | Inverse variance weighted | 5.303624624 | 10 | 0.869994887 |
| 1173 | zaZf8A | QoRiKP | Forced expiratory volume in 1-second (FEV1), predicted percentage | genus.Oscillospira.id.2064                | MR Egger                  | 6.072759316 | 6  | 0.41508913  |

|      | A      | B      | C                                                                 | D                                       | E                         | F           | G  | H           |
|------|--------|--------|-------------------------------------------------------------------|-----------------------------------------|---------------------------|-------------|----|-------------|
| 1174 | zaZf8A | QoRiKP | Forced expiratory volume in 1-second (FEV1), predicted percentage | genus.Oscillospira.id.2064              | Inverse variance weighted | 6.10586757  | 7  | 0.527443649 |
| 1175 | ZJXDpG | QoRiKP | Forced expiratory volume in 1-second (FEV1), predicted percentage | class.Erysipelotrichia.id.2147          | MR Egger                  | 9.343930252 | 11 | 0.590178539 |
| 1176 | ZJXDpG | QoRiKP | Forced expiratory volume in 1-second (FEV1), predicted percentage | class.Erysipelotrichia.id.2147          | Inverse variance weighted | 9.885045119 | 12 | 0.626044953 |
| 1177 | zkWLyI | QoRiKP | Forced expiratory volume in 1-second (FEV1), predicted percentage | genus.Allisonella.id.2174               | MR Egger                  | 7.63487078  | 6  | 0.266092183 |
| 1178 | zkWLyI | QoRiKP | Forced expiratory volume in 1-second (FEV1), predicted percentage | genus.Allisonella.id.2174               | Inverse variance weighted | 7.910363941 | 7  | 0.340564306 |
| 1179 | 0aMbT3 | 1SSbcA | COPD                                                              | genus.Eggerthella.id.819                | MR Egger                  | 11.75197957 | 7  | 0.109015861 |
| 1180 | 0aMbT3 | 1SSbcA | COPD                                                              | genus.Eggerthella.id.819                | Inverse variance weighted | 13.06782794 | 8  | 0.109537078 |
| 1181 | 0heWA4 | 1SSbcA | COPD                                                              | genus.Lactococcus.id.1851               | MR Egger                  | 11.19662288 | 6  | 0.082486364 |
| 1182 | 0heWA4 | 1SSbcA | COPD                                                              | genus.Lactococcus.id.1851               | Inverse variance weighted | 11.73227129 | 7  | 0.109714197 |
| 1183 | 0IsDJy | 1SSbcA | COPD                                                              | genus.DefluviitaleaceaeUCG011.id.11287  | MR Egger                  | 12.51091454 | 7  | 0.084960212 |
| 1184 | 0IsDJy | 1SSbcA | COPD                                                              | genus.DefluviitaleaceaeUCG011.id.11287  | Inverse variance weighted | 12.60438714 | 8  | 0.126205805 |
| 1185 | 0ngO8p | 1SSbcA | COPD                                                              | genus.Flavonifractor.id.2059            | MR Egger                  | 2.326054894 | 3  | 0.507547865 |
| 1186 | 0ngO8p | 1SSbcA | COPD                                                              | genus.Flavonifractor.id.2059            | Inverse variance weighted | 2.427820825 | 4  | 0.657605519 |
| 1187 | 0rTnk2 | 1SSbcA | COPD                                                              | genus.Lachnospira.id.2004               | MR Egger                  | 5.069879708 | 4  | 0.280202263 |
| 1188 | 0rTnk2 | 1SSbcA | COPD                                                              | genus.Lachnospira.id.2004               | Inverse variance weighted | 9.321488156 | 5  | 0.096907964 |
| 1189 | 0rWmph | 1SSbcA | COPD                                                              | phylum.Firmicutes.id.1672               | MR Egger                  | 30.01719118 | 12 | 0.002775838 |
| 1190 | 0rWmph | 1SSbcA | COPD                                                              | phylum.Firmicutes.id.1672               | Inverse variance weighted | 30.65784    | 13 | 0.00378218  |
| 1191 | 0Vfsi1 | 1SSbcA | COPD                                                              | genus.Hungatella.id.11306               | MR Egger                  | 5.456978953 | 3  | 0.141234515 |
| 1192 | 0Vfsi1 | 1SSbcA | COPD                                                              | genus.Hungatella.id.11306               | Inverse variance weighted | 5.679050877 | 4  | 0.224433313 |
| 1193 | 1rpkul | 1SSbcA | COPD                                                              | genus.FamilyXIIIUCG001.id.11294         | MR Egger                  | 8.624978205 | 6  | 0.195793267 |
| 1194 | 1rpkul | 1SSbcA | COPD                                                              | genus.FamilyXIIIUCG001.id.11294         | Inverse variance weighted | 14.65477678 | 7  | 0.040688254 |
| 1195 | 1uqUdL | 1SSbcA | COPD                                                              | genus.Escherichia.Shigella.id.3504      | MR Egger                  | 14.87182527 | 8  | 0.06168618  |
| 1196 | 1uqUdL | 1SSbcA | COPD                                                              | genus.Escherichia.Shigella.id.3504      | Inverse variance weighted | 15.16948962 | 9  | 0.086384363 |
| 1197 | 1zf0TZ | 1SSbcA | COPD                                                              | family.Streptococcaceae.id.1850         | MR Egger                  | 11.23808968 | 8  | 0.188570208 |
| 1198 | 1zf0TZ | 1SSbcA | COPD                                                              | family.Streptococcaceae.id.1850         | Inverse variance weighted | 11.4711628  | 9  | 0.244789474 |
| 1199 | 20HL0T | 1SSbcA | COPD                                                              | genus.Holdemanela.id.11393              | MR Egger                  | 6.338505434 | 9  | 0.705619178 |
| 1200 | 20HL0T | 1SSbcA | COPD                                                              | genus.Holdemanela.id.11393              | Inverse variance weighted | 6.567801743 | 10 | 0.765519426 |
| 1201 | 2GJP3o | 1SSbcA | COPD                                                              | genus.Ruminococcus2.id.11374            | MR Egger                  | 11.72389122 | 13 | 0.550404394 |
| 1202 | 2GJP3o | 1SSbcA | COPD                                                              | genus.Ruminococcus2.id.11374            | Inverse variance weighted | 12.02598485 | 14 | 0.604215908 |
| 1203 | 2neTKK | 1SSbcA | COPD                                                              | phylum.Euryarchaeota.id.55              | MR Egger                  | 23.60853227 | 8  | 0.002664811 |
| 1204 | 2neTKK | 1SSbcA | COPD                                                              | phylum.Euryarchaeota.id.55              | Inverse variance weighted | 24.38429157 | 9  | 0.003733367 |
| 1205 | 2vslhf | 1SSbcA | COPD                                                              | genus.Coprococcus2.id.11302             | MR Egger                  | 2.550880553 | 6  | 0.862730426 |
| 1206 | 2vslhf | 1SSbcA | COPD                                                              | genus.Coprococcus2.id.11302             | Inverse variance weighted | 3.300797446 | 7  | 0.855852461 |
| 1207 | 31r1VV | 1SSbcA | COPD                                                              | family.Christensenellaceae.id.1866      | MR Egger                  | 9.182971506 | 9  | 0.420558759 |
| 1208 | 31r1VV | 1SSbcA | COPD                                                              | family.Christensenellaceae.id.1866      | Inverse variance weighted | 9.943882028 | 10 | 0.445430458 |
| 1209 | 37ZEpl | 1SSbcA | COPD                                                              | genus..Eubacteriumrectalegroup.id.14374 | MR Egger                  | 6.911786231 | 6  | 0.329082315 |
| 1210 | 37ZEpl | 1SSbcA | COPD                                                              | genus..Eubacteriumrectalegroup.id.14374 | Inverse variance weighted | 7.299395516 | 7  | 0.398386625 |
| 1211 | 3cOJ1f | 1SSbcA | COPD                                                              | class.Actinobacteria.id.419             | MR Egger                  | 15.31996409 | 11 | 0.168312382 |
| 1212 | 3cOJ1f | 1SSbcA | COPD                                                              | class.Actinobacteria.id.419             | Inverse variance weighted | 16.63458368 | 12 | 0.163867673 |
| 1213 | 3Oo7Td | 1SSbcA | COPD                                                              | class.Methanobacteria.id.119            | MR Egger                  | 7.650011413 | 6  | 0.264881715 |
| 1214 | 3Oo7Td | 1SSbcA | COPD                                                              | class.Methanobacteria.id.119            | Inverse variance weighted | 13.44175589 | 7  | 0.062049144 |
| 1215 | 3tgfXE | 1SSbcA | COPD                                                              | genus.Subdoligranulum.id.2070           | MR Egger                  | 7.435607914 | 9  | 0.591863198 |
| 1216 | 3tgfXE | 1SSbcA | COPD                                                              | genus.Subdoligranulum.id.2070           | Inverse variance weighted | 8.514194563 | 10 | 0.578742393 |
| 1217 | 4zBtt2 | 1SSbcA | COPD                                                              | genus.Bilophila.id.3170                 | MR Egger                  | 21.25858173 | 11 | 0.030788922 |
| 1218 | 4zBtt2 | 1SSbcA | COPD                                                              | genus.Bilophila.id.3170                 | Inverse variance weighted | 21.58003941 | 12 | 0.04250513  |
| 1219 | 5IXuob | 1SSbcA | COPD                                                              | genus.RuminococcaceaeUCG014.id.11371    | MR Egger                  | 5.681427746 | 8  | 0.682867026 |
| 1220 | 5IXuob | 1SSbcA | COPD                                                              | genus.RuminococcaceaeUCG014.id.11371    | Inverse variance weighted | 13.37752806 | 9  | 0.14625427  |
| 1221 | 5qEcKL | 1SSbcA | COPD                                                              | genus.Streptococcus.id.1853             | MR Egger                  | 12.47686342 | 10 | 0.254408115 |
| 1222 | 5qEcKL | 1SSbcA | COPD                                                              | genus.Streptococcus.id.1853             | Inverse variance weighted | 12.49802805 | 11 | 0.327394571 |
| 1223 | 5TN0Z7 | 1SSbcA | COPD                                                              | genus.Oscillibacter.id.2063             | MR Egger                  | 14.33855934 | 9  | 0.110781413 |
| 1224 | 5TN0Z7 | 1SSbcA | COPD                                                              | genus.Oscillibacter.id.2063             | Inverse variance weighted | 18.22116297 | 10 | 0.051345578 |

|      | A      | B      | C    | D                                           | E                         | F           | G  | H           |
|------|--------|--------|------|---------------------------------------------|---------------------------|-------------|----|-------------|
| 1225 | 5XtLwc | 1SSbcA | COPD | genus.Catenibacterium.id.2153               | MR Egger                  | 0.884140877 | 2  | 0.642704363 |
| 1226 | 5XtLwc | 1SSbcA | COPD | genus.Catenibacterium.id.2153               | Inverse variance weighted | 1.100041878 | 3  | 0.777063974 |
| 1227 | 6gX3qe | 1SSbcA | COPD | phylum.Tenericutes.id.3919                  | MR Egger                  | 11.0667947  | 10 | 0.352337822 |
| 1228 | 6gX3qe | 1SSbcA | COPD | phylum.Tenericutes.id.3919                  | Inverse variance weighted | 11.2292615  | 11 | 0.424261265 |
| 1229 | 6jMcBB | 1SSbcA | COPD | family.Desulfovibrionaceae.id.3169          | MR Egger                  | 6.100725042 | 7  | 0.528038752 |
| 1230 | 6jMcBB | 1SSbcA | COPD | family.Desulfovibrionaceae.id.3169          | Inverse variance weighted | 13.60455528 | 8  | 0.092672829 |
| 1231 | 6mIWxZ | 1SSbcA | COPD | genus.Coprobacter.id.949                    | MR Egger                  | 8.613603263 | 9  | 0.473678412 |
| 1232 | 6mIWxZ | 1SSbcA | COPD | genus.Coprobacter.id.949                    | Inverse variance weighted | 8.859012626 | 10 | 0.545534135 |
| 1233 | 77YJKV | 1SSbcA | COPD | genus..Eubacteriumruminantiumgroup.id.11340 | MR Egger                  | 34.94700715 | 16 | 0.004041181 |
| 1234 | 77YJKV | 1SSbcA | COPD | genus..Eubacteriumruminantiumgroup.id.11340 | Inverse variance weighted | 35.13019545 | 17 | 0.005980793 |
| 1235 | 7aTYpg | 1SSbcA | COPD | genus.Collinsella.id.815                    | MR Egger                  | 4.532362107 | 7  | 0.716816907 |
| 1236 | 7aTYpg | 1SSbcA | COPD | genus.Collinsella.id.815                    | Inverse variance weighted | 4.827052489 | 8  | 0.775890994 |
| 1237 | 7dqlOH | 1SSbcA | COPD | genus..Clostridiuminnocuumgroup.id.14397    | MR Egger                  | 8.649521309 | 6  | 0.194269193 |
| 1238 | 7dqlOH | 1SSbcA | COPD | genus..Clostridiuminnocuumgroup.id.14397    | Inverse variance weighted | 8.658085939 | 7  | 0.27814483  |
| 1239 | 7ioeKt | 1SSbcA | COPD | phylum.Proteobacteria.id.2375               | MR Egger                  | 20.31424656 | 10 | 0.026416698 |
| 1240 | 7ioeKt | 1SSbcA | COPD | phylum.Proteobacteria.id.2375               | Inverse variance weighted | 20.8001475  | 11 | 0.035501698 |
| 1241 | 80h8vf | 1SSbcA | COPD | genus.Anaerostipes.id.1991                  | MR Egger                  | 15.50679514 | 11 | 0.160450794 |
| 1242 | 80h8vf | 1SSbcA | COPD | genus.Anaerostipes.id.1991                  | Inverse variance weighted | 21.48887042 | 12 | 0.043663953 |
| 1243 | 8jKldu | 1SSbcA | COPD | genus.Coprococcus3.id.11303                 | MR Egger                  | 6.917110862 | 6  | 0.328580861 |
| 1244 | 8jKldu | 1SSbcA | COPD | genus.Coprococcus3.id.11303                 | Inverse variance weighted | 6.930143745 | 7  | 0.436189383 |
| 1245 | 8NULRM | 1SSbcA | COPD | genus.Paraprevotella.id.962                 | MR Egger                  | 6.420767757 | 10 | 0.778760828 |
| 1246 | 8NULRM | 1SSbcA | COPD | genus.Paraprevotella.id.962                 | Inverse variance weighted | 6.753110949 | 11 | 0.818710128 |
| 1247 | 9i4tiU | 1SSbcA | COPD | order.Gastranaerophilales.id.1591           | MR Egger                  | 3.733979364 | 7  | 0.809857138 |
| 1248 | 9i4tiU | 1SSbcA | COPD | order.Gastranaerophilales.id.1591           | Inverse variance weighted | 3.780270595 | 8  | 0.876384069 |
| 1249 | 9s731W | 1SSbcA | COPD | genus.RuminococcaceaeUCG009.id.11366        | MR Egger                  | 17.10338136 | 9  | 0.047121434 |
| 1250 | 9s731W | 1SSbcA | COPD | genus.RuminococcaceaeUCG009.id.11366        | Inverse variance weighted | 20.72817283 | 10 | 0.023070832 |
| 1251 | acLMuF | 1SSbcA | COPD | genus.Parasutterella.id.2892                | MR Egger                  | 21.00915056 | 11 | 0.033276376 |
| 1252 | acLMuF | 1SSbcA | COPD | genus.Parasutterella.id.2892                | Inverse variance weighted | 22.55164439 | 12 | 0.031782669 |
| 1253 | AdsBD9 | 1SSbcA | COPD | genus.Turicibacter.id.2162                  | MR Egger                  | 8.302753744 | 7  | 0.306655913 |
| 1254 | AdsBD9 | 1SSbcA | COPD | genus.Turicibacter.id.2162                  | Inverse variance weighted | 8.318798073 | 8  | 0.40296468  |
| 1255 | aGfu8V | 1SSbcA | COPD | order.Bifidobacteriales.id.432              | MR Egger                  | 9.190184351 | 8  | 0.326507273 |
| 1256 | aGfu8V | 1SSbcA | COPD | order.Bifidobacteriales.id.432              | Inverse variance weighted | 9.508448835 | 9  | 0.391722244 |
| 1257 | AK0I7A | 1SSbcA | COPD | genus.LachnospiraceaeUCG010.id.11330        | MR Egger                  | 2.670235425 | 8  | 0.95331967  |
| 1258 | AK0I7A | 1SSbcA | COPD | genus.LachnospiraceaeUCG010.id.11330        | Inverse variance weighted | 5.260201961 | 9  | 0.811061495 |
| 1259 | aKuChq | 1SSbcA | COPD | genus.Faecalibacterium.id.2057              | MR Egger                  | 5.347505902 | 7  | 0.617635447 |
| 1260 | aKuChq | 1SSbcA | COPD | genus.Faecalibacterium.id.2057              | Inverse variance weighted | 5.388769636 | 8  | 0.715329753 |
| 1261 | aKXyAu | 1SSbcA | COPD | genus.Blautia.id.1992                       | MR Egger                  | 8.386147216 | 10 | 0.591173895 |
| 1262 | aKXyAu | 1SSbcA | COPD | genus.Blautia.id.1992                       | Inverse variance weighted | 10.9480746  | 11 | 0.447623652 |
| 1263 | AN8qjo | 1SSbcA | COPD | genus.Clostridiumsensustricto1.id.1873      | MR Egger                  | 7.999792643 | 4  | 0.09158579  |
| 1264 | AN8qjo | 1SSbcA | COPD | genus.Clostridiumsensustricto1.id.1873      | Inverse variance weighted | 10.02122135 | 5  | 0.074636177 |
| 1265 | anDrA2 | 1SSbcA | COPD | genus..Eubacteriumventriosumgroup.id.11341  | MR Egger                  | 16.65606405 | 13 | 0.215507556 |
| 1266 | anDrA2 | 1SSbcA | COPD | genus..Eubacteriumventriosumgroup.id.11341  | Inverse variance weighted | 21.28218166 | 14 | 0.094616831 |
| 1267 | ASQ2fp | 1SSbcA | COPD | genus.RuminococcaceaeNK4A214group.id.11358  | MR Egger                  | 8.297626612 | 11 | 0.686420807 |
| 1268 | ASQ2fp | 1SSbcA | COPD | genus.RuminococcaceaeNK4A214group.id.11358  | Inverse variance weighted | 9.542163463 | 12 | 0.656056641 |
| 1269 | aToCrK | 1SSbcA | COPD | genus.Anaerotruncus.id.2054                 | MR Egger                  | 30.90601112 | 11 | 0.001140035 |
| 1270 | aToCrK | 1SSbcA | COPD | genus.Anaerotruncus.id.2054                 | Inverse variance weighted | 32.92303576 | 12 | 0.000995149 |
| 1271 | axDRMS | 1SSbcA | COPD | family.Prevotellaceae.id.960                | MR Egger                  | 6.824496773 | 14 | 0.941265632 |
| 1272 | axDRMS | 1SSbcA | COPD | family.Prevotellaceae.id.960                | Inverse variance weighted | 7.436760616 | 15 | 0.944378379 |
| 1273 | AXpdwL | 1SSbcA | COPD | family.Verrucomicrobiaceae.id.4036          | MR Egger                  | 16.47947777 | 9  | 0.057519283 |
| 1274 | AXpdwL | 1SSbcA | COPD | family.Verrucomicrobiaceae.id.4036          | Inverse variance weighted | 17.37886889 | 10 | 0.066389797 |
| 1275 | B5jn0Y | 1SSbcA | COPD | genus.Roseburia.id.2012                     | MR Egger                  | 9.687002533 | 12 | 0.643398317 |

|      | A      | B      | C    | D                                           | E                         | F           | G  | H           |
|------|--------|--------|------|---------------------------------------------|---------------------------|-------------|----|-------------|
| 1276 | B5jn0Y | 1SSbcA | COPD | genus.Roseburia.id.2012                     | Inverse variance weighted | 9.687057682 | 13 | 0.719302575 |
| 1277 | BiKMtW | 1SSbcA | COPD | genus.Sutterella.id.2896                    | MR Egger                  | 5.196444647 | 10 | 0.877674771 |
| 1278 | BiKMtW | 1SSbcA | COPD | genus.Sutterella.id.2896                    | Inverse variance weighted | 5.986814351 | 11 | 0.874242587 |
| 1279 | BLC7wV | 1SSbcA | COPD | genus.RuminococcaceaeUCG013.id.11370        | MR Egger                  | 4.425183159 | 9  | 0.881269968 |
| 1280 | BLC7wV | 1SSbcA | COPD | genus.RuminococcaceaeUCG013.id.11370        | Inverse variance weighted | 4.465709916 | 10 | 0.923902731 |
| 1281 | BLSFBU | 1SSbcA | COPD | family.Rikenellaceae.id.967                 | MR Egger                  | 24.6035147  | 14 | 0.038689392 |
| 1282 | BLSFBU | 1SSbcA | COPD | family.Rikenellaceae.id.967                 | Inverse variance weighted | 25.97149125 | 15 | 0.038323399 |
| 1283 | BPW89n | 1SSbcA | COPD | order.Verrucomicrobiales.id.4030            | MR Egger                  | 16.46941663 | 9  | 0.057702863 |
| 1284 | BPW89n | 1SSbcA | COPD | order.Verrucomicrobiales.id.4030            | Inverse variance weighted | 17.37774735 | 10 | 0.066412227 |
| 1285 | BtOkEx | 1SSbcA | COPD | genus.LachnospiraceaeNK4A136group.id.11319  | MR Egger                  | 5.887300506 | 12 | 0.921656148 |
| 1286 | BtOkEx | 1SSbcA | COPD | genus.LachnospiraceaeNK4A136group.id.11319  | Inverse variance weighted | 7.515414131 | 13 | 0.873676447 |
| 1287 | Bt1upE | 1SSbcA | COPD | family.Rhodospirillaceae.id.2717            | MR Egger                  | 8.392662231 | 12 | 0.753741866 |
| 1288 | Bt1upE | 1SSbcA | COPD | family.Rhodospirillaceae.id.2717            | Inverse variance weighted | 8.833231321 | 13 | 0.785418922 |
| 1289 | C1xV1V | 1SSbcA | COPD | order.Victivallales.id.2254                 | MR Egger                  | 7.347986689 | 6  | 0.289860612 |
| 1290 | C1xV1V | 1SSbcA | COPD | order.Victivallales.id.2254                 | Inverse variance weighted | 7.394768077 | 7  | 0.388964964 |
| 1291 | c62fwk | 1SSbcA | COPD | genus.Sellimonas.id.14369                   | MR Egger                  | 6.420728242 | 7  | 0.49156873  |
| 1292 | c62fwk | 1SSbcA | COPD | genus.Sellimonas.id.14369                   | Inverse variance weighted | 7.618832492 | 8  | 0.471560305 |
| 1293 | cqFLTQ | 1SSbcA | COPD | genus.Coproccoccus1.id.11301                | MR Egger                  | 19.74424757 | 10 | 0.031766614 |
| 1294 | cqFLTQ | 1SSbcA | COPD | genus.Coproccoccus1.id.11301                | Inverse variance weighted | 20.01463871 | 11 | 0.045140321 |
| 1295 | CUtsMo | 1SSbcA | COPD | family.ClostridialesvadinBB60group.id.11286 | MR Egger                  | 11.9169368  | 13 | 0.534466564 |
| 1296 | CUtsMo | 1SSbcA | COPD | family.ClostridialesvadinBB60group.id.11286 | Inverse variance weighted | 11.94654417 | 14 | 0.610595818 |
| 1297 | CYNr8c | 1SSbcA | COPD | order.Actinomycetales.id.420                | MR Egger                  | 1.817551342 | 2  | 0.403017348 |
| 1298 | CYNr8c | 1SSbcA | COPD | order.Actinomycetales.id.420                | Inverse variance weighted | 6.370926661 | 3  | 0.094894212 |
| 1299 | d9u3Wa | 1SSbcA | COPD | family.Lactobacillaceae.id.1836             | MR Egger                  | 13.60980235 | 5  | 0.01828752  |
| 1300 | d9u3Wa | 1SSbcA | COPD | family.Lactobacillaceae.id.1836             | Inverse variance weighted | 14.14318789 | 6  | 0.028076939 |
| 1301 | dP6VTT | 1SSbcA | COPD | class.Alphaproteobacteria.id.2379           | MR Egger                  | 3.182601589 | 4  | 0.527745664 |
| 1302 | dP6VTT | 1SSbcA | COPD | class.Alphaproteobacteria.id.2379           | Inverse variance weighted | 4.596981372 | 5  | 0.46701344  |
| 1303 | dSCeM7 | 1SSbcA | COPD | order.Enterobacteriales.id.3468             | MR Egger                  | 6.163316308 | 5  | 0.290650393 |
| 1304 | dSCeM7 | 1SSbcA | COPD | order.Enterobacteriales.id.3468             | Inverse variance weighted | 6.506424787 | 6  | 0.368909253 |
| 1305 | DwGyne | 1SSbcA | COPD | family.BacteroidalesS24.7group.id.11173     | MR Egger                  | 3.759615005 | 6  | 0.709168647 |
| 1306 | DwGyne | 1SSbcA | COPD | family.BacteroidalesS24.7group.id.11173     | Inverse variance weighted | 4.298602178 | 7  | 0.744813293 |
| 1307 | E12DX3 | 1SSbcA | COPD | genus.Oxalobacter.id.2978                   | MR Egger                  | 18.6699983  | 9  | 0.028149706 |
| 1308 | E12DX3 | 1SSbcA | COPD | genus.Oxalobacter.id.2978                   | Inverse variance weighted | 18.77302098 | 10 | 0.043242192 |
| 1309 | e5mJnF | 1SSbcA | COPD | genus.Dorea.id.1997                         | MR Egger                  | 18.58790177 | 8  | 0.017225889 |
| 1310 | e5mJnF | 1SSbcA | COPD | genus.Dorea.id.1997                         | Inverse variance weighted | 18.59918413 | 9  | 0.028825039 |
| 1311 | ebP4zV | 1SSbcA | COPD | genus.Ruminococcus1.id.11373                | MR Egger                  | 13.13716359 | 8  | 0.107216578 |
| 1312 | ebP4zV | 1SSbcA | COPD | genus.Ruminococcus1.id.11373                | Inverse variance weighted | 13.47385186 | 9  | 0.14231072  |
| 1313 | FcqSNY | 1SSbcA | COPD | family.Clostridiaceae1.id.1869              | MR Egger                  | 16.64544692 | 8  | 0.034020209 |
| 1314 | FcqSNY | 1SSbcA | COPD | family.Clostridiaceae1.id.1869              | Inverse variance weighted | 23.77083403 | 9  | 0.004678706 |
| 1315 | fE3r8h | 1SSbcA | COPD | phylum.Verrucomicrobia.id.3982              | MR Egger                  | 13.37422572 | 10 | 0.203494387 |
| 1316 | fE3r8h | 1SSbcA | COPD | phylum.Verrucomicrobia.id.3982              | Inverse variance weighted | 16.22681875 | 11 | 0.132917016 |
| 1317 | FFi1Rd | 1SSbcA | COPD | family.Actinomycetaceae.id.421              | MR Egger                  | 1.80135515  | 2  | 0.406294272 |
| 1318 | FFi1Rd | 1SSbcA | COPD | family.Actinomycetaceae.id.421              | Inverse variance weighted | 6.378913068 | 3  | 0.094562163 |
| 1319 | FIVBaS | 1SSbcA | COPD | order.Erysipelotrichales.id.2148            | MR Egger                  | 16.00046566 | 11 | 0.141113594 |
| 1320 | FIVBaS | 1SSbcA | COPD | order.Erysipelotrichales.id.2148            | Inverse variance weighted | 16.10746141 | 12 | 0.186363569 |
| 1321 | Fr2Ff4 | 1SSbcA | COPD | class.Clostridia.id.1859                    | MR Egger                  | 17.39246312 | 8  | 0.026272181 |
| 1322 | Fr2Ff4 | 1SSbcA | COPD | class.Clostridia.id.1859                    | Inverse variance weighted | 19.68565614 | 9  | 0.019954585 |
| 1323 | FRQYhm | 1SSbcA | COPD | class.Gammaproteobacteria.id.3303           | MR Egger                  | 2.671410511 | 5  | 0.750487479 |
| 1324 | FRQYhm | 1SSbcA | COPD | class.Gammaproteobacteria.id.3303           | Inverse variance weighted | 4.051510693 | 6  | 0.669705585 |
| 1325 | FT7OrH | 1SSbcA | COPD | genus.Actinomyces.id.423                    | MR Egger                  | 4.722998788 | 5  | 0.450611994 |
| 1326 | FT7OrH | 1SSbcA | COPD | genus.Actinomyces.id.423                    | Inverse variance weighted | 18.71180829 | 6  | 0.004679067 |

|      | A      | B      | C    | D                                           | E                         | F           | G  | H           |
|------|--------|--------|------|---------------------------------------------|---------------------------|-------------|----|-------------|
| 1327 | FXBXNG | 1SSbcA | COPD | family.FamilyXI.id.1936                     | MR Egger                  | 3.989428451 | 6  | 0.678107116 |
| 1328 | FXBXNG | 1SSbcA | COPD | family.FamilyXI.id.1936                     | Inverse variance weighted | 7.21029078  | 7  | 0.407317975 |
| 1329 | gkAVOW | 1SSbcA | COPD | phylum.Lentisphaerae.id.2238                | MR Egger                  | 7.36653853  | 7  | 0.391738737 |
| 1330 | gkAVOW | 1SSbcA | COPD | phylum.Lentisphaerae.id.2238                | Inverse variance weighted | 7.393780633 | 8  | 0.494802488 |
| 1331 | GNp2YQ | 1SSbcA | COPD | genus..Ruminococcusgavvreauiigroup.id.11342 | MR Egger                  | 14.82620936 | 9  | 0.095821665 |
| 1332 | GNp2YQ | 1SSbcA | COPD | genus..Ruminococcusgavvreauiigroup.id.11342 | Inverse variance weighted | 15.36535063 | 10 | 0.119298673 |
| 1333 | hUph1f | 1SSbcA | COPD | genus.RikenellaceaeRC9gutgroup.id.11191     | MR Egger                  | 21.30509082 | 9  | 0.011362535 |
| 1334 | hUph1f | 1SSbcA | COPD | genus.RikenellaceaeRC9gutgroup.id.11191     | Inverse variance weighted | 22.8346245  | 10 | 0.011373744 |
| 1335 | l2CEyx | 1SSbcA | COPD | genus.TyzzereIIa3.id.11335                  | MR Egger                  | 14.40289955 | 10 | 0.155394456 |
| 1336 | l2CEyx | 1SSbcA | COPD | genus.TyzzereIIa3.id.11335                  | Inverse variance weighted | 14.41954538 | 11 | 0.210641169 |
| 1337 | l5XXsr | 1SSbcA | COPD | genus.Prevotella9.id.11183                  | MR Egger                  | 4.970080583 | 13 | 0.975845859 |
| 1338 | l5XXsr | 1SSbcA | COPD | genus.Prevotella9.id.11183                  | Inverse variance weighted | 6.028923794 | 14 | 0.965757169 |
| 1339 | iAhkfC | 1SSbcA | COPD | genus.Erysipelatoclostridium.id.11381       | MR Egger                  | 17.3943394  | 13 | 0.181898428 |
| 1340 | iAhkfC | 1SSbcA | COPD | genus.Erysipelatoclostridium.id.11381       | Inverse variance weighted | 17.73715776 | 14 | 0.219015457 |
| 1341 | IgBtIU | 1SSbcA | COPD | class.Bacilli.id.1673                       | MR Egger                  | 23.85994089 | 15 | 0.067510422 |
| 1342 | IgBtIU | 1SSbcA | COPD | class.Bacilli.id.1673                       | Inverse variance weighted | 28.83207332 | 16 | 0.025093331 |
| 1343 | lI0qrp | 1SSbcA | COPD | phylum.Actinobacteria.id.400                | MR Egger                  | 13.33280233 | 11 | 0.272131214 |
| 1344 | lI0qrp | 1SSbcA | COPD | phylum.Actinobacteria.id.400                | Inverse variance weighted | 13.37936668 | 12 | 0.342080076 |
| 1345 | iMGTCd | 1SSbcA | COPD | genus.Ruminiclostridium5.id.11355           | MR Egger                  | 6.417511269 | 9  | 0.697513276 |
| 1346 | iMGTCd | 1SSbcA | COPD | genus.Ruminiclostridium5.id.11355           | Inverse variance weighted | 9.705194717 | 10 | 0.466727117 |
| 1347 | iwPblH | 1SSbcA | COPD | genus.Ruminiclostridium6.id.11356           | MR Egger                  | 16.37073971 | 13 | 0.229688237 |
| 1348 | iwPblH | 1SSbcA | COPD | genus.Ruminiclostridium6.id.11356           | Inverse variance weighted | 17.00133442 | 14 | 0.256106756 |
| 1349 | j0mByI | 1SSbcA | COPD | order.NB1n.id.3953                          | MR Egger                  | 9.506565001 | 10 | 0.484795336 |
| 1350 | j0mByI | 1SSbcA | COPD | order.NB1n.id.3953                          | Inverse variance weighted | 10.17840129 | 11 | 0.514414912 |
| 1351 | j4g0ZV | 1SSbcA | COPD | genus.CandidatusSoleaferrea.id.11350        | MR Egger                  | 13.03453527 | 7  | 0.071271403 |
| 1352 | j4g0ZV | 1SSbcA | COPD | genus.CandidatusSoleaferrea.id.11350        | Inverse variance weighted | 14.70263719 | 8  | 0.065192014 |
| 1353 | j87dXS | 1SSbcA | COPD | genus.Eisenbergiella.id.11304               | MR Egger                  | 18.21816353 | 9  | 0.03272518  |
| 1354 | j87dXS | 1SSbcA | COPD | genus.Eisenbergiella.id.11304               | Inverse variance weighted | 18.32046367 | 10 | 0.049792555 |
| 1355 | jfZByg | 1SSbcA | COPD | order.Lactobacillales.id.1800               | MR Egger                  | 5.89042725  | 12 | 0.921504394 |
| 1356 | jfZByg | 1SSbcA | COPD | order.Lactobacillales.id.1800               | Inverse variance weighted | 12.01942708 | 13 | 0.526051477 |
| 1357 | JHChB7 | 1SSbcA | COPD | genus.Adlercreutzia.id.812                  | MR Egger                  | 7.779998546 | 6  | 0.254668365 |
| 1358 | JHChB7 | 1SSbcA | COPD | genus.Adlercreutzia.id.812                  | Inverse variance weighted | 7.795644601 | 7  | 0.350958361 |
| 1359 | jHia6Z | 1SSbcA | COPD | order.Pasteurellales.id.3688                | MR Egger                  | 20.84386914 | 11 | 0.035025171 |
| 1360 | jHia6Z | 1SSbcA | COPD | order.Pasteurellales.id.3688                | Inverse variance weighted | 24.78664227 | 12 | 0.015866903 |
| 1361 | jJC3Fm | 1SSbcA | COPD | genus.Enterorhabdus.id.820                  | MR Egger                  | 12.07384555 | 4  | 0.016810496 |
| 1362 | jJC3Fm | 1SSbcA | COPD | genus.Enterorhabdus.id.820                  | Inverse variance weighted | 13.1507977  | 5  | 0.022005875 |
| 1363 | jUCepg | 1SSbcA | COPD | genus.Butyricimonas.id.945                  | MR Egger                  | 11.40189862 | 11 | 0.410233198 |
| 1364 | jUCepg | 1SSbcA | COPD | genus.Butyricimonas.id.945                  | Inverse variance weighted | 13.76145971 | 12 | 0.316199768 |
| 1365 | kjA5PB | 1SSbcA | COPD | genus.RuminococcaceaeUCG010.id.11367        | MR Egger                  | 4.544001065 | 4  | 0.337361929 |
| 1366 | kjA5PB | 1SSbcA | COPD | genus.RuminococcaceaeUCG010.id.11367        | Inverse variance weighted | 5.293381614 | 5  | 0.381134285 |
| 1367 | kodRd1 | 1SSbcA | COPD | family.Defluviitaleaceae.id.1924            | MR Egger                  | 12.9348799  | 9  | 0.165575085 |
| 1368 | kodRd1 | 1SSbcA | COPD | family.Defluviitaleaceae.id.1924            | Inverse variance weighted | 12.96371613 | 10 | 0.225707571 |
| 1369 | LCZ8yH | 1SSbcA | COPD | genus.Prevotella7.id.11182                  | MR Egger                  | 2.330647648 | 9  | 0.985096583 |
| 1370 | LCZ8yH | 1SSbcA | COPD | genus.Prevotella7.id.11182                  | Inverse variance weighted | 2.44081811  | 10 | 0.991710359 |
| 1371 | lJcL8y | 1SSbcA | COPD | genus.RuminococcaceaeUCG003.id.11361        | MR Egger                  | 8.460666797 | 10 | 0.583933953 |
| 1372 | lJcL8y | 1SSbcA | COPD | genus.RuminococcaceaeUCG003.id.11361        | Inverse variance weighted | 10.14449958 | 11 | 0.517438125 |
| 1373 | LKYg6S | 1SSbcA | COPD | genus.Terrisporobacter.id.11348             | MR Egger                  | 0.704003256 | 3  | 0.872261941 |
| 1374 | LKYg6S | 1SSbcA | COPD | genus.Terrisporobacter.id.11348             | Inverse variance weighted | 0.956555646 | 4  | 0.916310456 |
| 1375 | LRKdIa | 1SSbcA | COPD | family.Bifidobacteriaceae.id.433            | MR Egger                  | 9.190184351 | 8  | 0.326507273 |
| 1376 | LRKdIa | 1SSbcA | COPD | family.Bifidobacteriaceae.id.433            | Inverse variance weighted | 9.508448835 | 9  | 0.391722244 |
| 1377 | m0ByAU | 1SSbcA | COPD | order.Desulfovibrionales.id.3156            | MR Egger                  | 9.304977924 | 9  | 0.409611676 |

|      | A      | B      | C    | D                                             | E                         | F           | G  | H           |
|------|--------|--------|------|-----------------------------------------------|---------------------------|-------------|----|-------------|
| 1378 | m0ByAU | 1SSbcA | COPD | order.Desulfovibrionales.id.3156              | Inverse variance weighted | 14.93035346 | 10 | 0.134621751 |
| 1379 | m9LXEq | 1SSbcA | COPD | family.Enterobacteriaceae.id.3469             | MR Egger                  | 6.163316308 | 5  | 0.290650393 |
| 1380 | m9LXEq | 1SSbcA | COPD | family.Enterobacteriaceae.id.3469             | Inverse variance weighted | 6.506424787 | 6  | 0.368909253 |
| 1381 | MBOR7Y | 1SSbcA | COPD | family.Coriobacteriaceae.id.811               | MR Egger                  | 10.9285076  | 12 | 0.535055359 |
| 1382 | MBOR7Y | 1SSbcA | COPD | family.Coriobacteriaceae.id.811               | Inverse variance weighted | 11.20384498 | 13 | 0.59374539  |
| 1383 | MpL626 | 1SSbcA | COPD | genus.Lachnospiraceae.id.11308                | MR Egger                  | 18.3129822  | 11 | 0.074596712 |
| 1384 | MpL626 | 1SSbcA | COPD | genus.Lachnospiraceae.id.11308                | Inverse variance weighted | 22.75957925 | 12 | 0.02983778  |
| 1385 | Msb4zz | 1SSbcA | COPD | class.Melainabacteria.id.1589                 | MR Egger                  | 5.008152845 | 8  | 0.756704391 |
| 1386 | Msb4zz | 1SSbcA | COPD | class.Melainabacteria.id.1589                 | Inverse variance weighted | 5.040979146 | 9  | 0.830721466 |
| 1387 | MXS84H | 1SSbcA | COPD | class.Negativicutes.id.2164                   | MR Egger                  | 6.093150074 | 10 | 0.807377375 |
| 1388 | MXS84H | 1SSbcA | COPD | class.Negativicutes.id.2164                   | Inverse variance weighted | 8.317556602 | 11 | 0.684606744 |
| 1389 | mz9jd0 | 1SSbcA | COPD | genus.Barnesiella.id.944                      | MR Egger                  | 8.76040285  | 10 | 0.554983276 |
| 1390 | mz9jd0 | 1SSbcA | COPD | genus.Barnesiella.id.944                      | Inverse variance weighted | 8.799189331 | 11 | 0.640421981 |
| 1391 | n3j0op | 1SSbcA | COPD | class.Deltaproteobacteria.id.3087             | MR Egger                  | 13.47804659 | 10 | 0.198157564 |
| 1392 | n3j0op | 1SSbcA | COPD | class.Deltaproteobacteria.id.3087             | Inverse variance weighted | 23.25228463 | 11 | 0.016281482 |
| 1393 | nFIAu5 | 1SSbcA | COPD | family.Lachnospiraceae.id.1987                | MR Egger                  | 12.76368831 | 14 | 0.545209724 |
| 1394 | nFIAu5 | 1SSbcA | COPD | family.Lachnospiraceae.id.1987                | Inverse variance weighted | 12.81681933 | 15 | 0.616444323 |
| 1395 | nlesEv | 1SSbcA | COPD | genus.Peptococcus.id.2037                     | MR Egger                  | 7.376887421 | 10 | 0.689449434 |
| 1396 | nlesEv | 1SSbcA | COPD | genus.Peptococcus.id.2037                     | Inverse variance weighted | 7.694874741 | 11 | 0.740347672 |
| 1397 | NKNDGp | 1SSbcA | COPD | order.Methanobacteriales.id.120               | MR Egger                  | 7.650011413 | 6  | 0.264881715 |
| 1398 | NKNDGp | 1SSbcA | COPD | order.Methanobacteriales.id.120               | Inverse variance weighted | 13.44175589 | 7  | 0.062049144 |
| 1399 | nnD7ru | 1SSbcA | COPD | genus..Eubacteriumoxidoreducensgroup.id.11339 | MR Egger                  | 3.830817303 | 3  | 0.280321853 |
| 1400 | nnD7ru | 1SSbcA | COPD | genus..Eubacteriumoxidoreducensgroup.id.11339 | Inverse variance weighted | 4.354662316 | 4  | 0.360130227 |
| 1401 | NqdTjG | 1SSbcA | COPD | genus.FamilyXIIIAD3011group.id.11293          | MR Egger                  | 32.11261222 | 11 | 0.000731629 |
| 1402 | NqdTjG | 1SSbcA | COPD | genus.FamilyXIIIAD3011group.id.11293          | Inverse variance weighted | 32.11366796 | 12 | 0.001328976 |
| 1403 | nQHoYD | 1SSbcA | COPD | class.Lentisphaeria.id.2250                   | MR Egger                  | 7.347986689 | 6  | 0.289860612 |
| 1404 | nQHoYD | 1SSbcA | COPD | class.Lentisphaeria.id.2250                   | Inverse variance weighted | 7.394768077 | 7  | 0.388964964 |
| 1405 | nRNBx9 | 1SSbcA | COPD | class.Mollicutes.id.3920                      | MR Egger                  | 11.0667947  | 10 | 0.352337822 |
| 1406 | nRNBx9 | 1SSbcA | COPD | class.Mollicutes.id.3920                      | Inverse variance weighted | 11.2292615  | 11 | 0.424261265 |
| 1407 | O0n2Pz | 1SSbcA | COPD | family.Bacteroidaceae.id.917                  | MR Egger                  | 13.05406933 | 6  | 0.042185312 |
| 1408 | O0n2Pz | 1SSbcA | COPD | family.Bacteroidaceae.id.917                  | Inverse variance weighted | 13.06966233 | 7  | 0.070429163 |
| 1409 | obtxsV | 1SSbcA | COPD | family.Veillonellaceae.id.2172                | MR Egger                  | 25.37039098 | 16 | 0.063556345 |
| 1410 | obtxsV | 1SSbcA | COPD | family.Veillonellaceae.id.2172                | Inverse variance weighted | 25.44129128 | 17 | 0.085259055 |
| 1411 | oChqj7 | 1SSbcA | COPD | phylum.Bacteroidetes.id.905                   | MR Egger                  | 11.01322274 | 8  | 0.200951105 |
| 1412 | oChqj7 | 1SSbcA | COPD | phylum.Bacteroidetes.id.905                   | Inverse variance weighted | 13.86020268 | 9  | 0.127385712 |
| 1413 | oGD8An | 1SSbcA | COPD | order.Coriobacteriales.id.810                 | MR Egger                  | 10.9285076  | 12 | 0.535055359 |
| 1414 | oGD8An | 1SSbcA | COPD | order.Coriobacteriales.id.810                 | Inverse variance weighted | 11.20384498 | 13 | 0.59374539  |
| 1415 | OhSZ6N | 1SSbcA | COPD | genus.RuminococcaceaeUCG002.id.11360          | MR Egger                  | 39.33365883 | 18 | 0.002569715 |
| 1416 | OhSZ6N | 1SSbcA | COPD | genus.RuminococcaceaeUCG002.id.11360          | Inverse variance weighted | 44.4204631  | 19 | 0.000825677 |
| 1417 | olDISu | 1SSbcA | COPD | genus..Eubacteriumnodatumgroup.id.11297       | MR Egger                  | 7.893865864 | 9  | 0.54487645  |
| 1418 | olDISu | 1SSbcA | COPD | genus..Eubacteriumnodatumgroup.id.11297       | Inverse variance weighted | 8.306375204 | 10 | 0.598937851 |
| 1419 | OtCSo3 | 1SSbcA | COPD | genus.Alloprevotella.id.961                   | MR Egger                  | 0.631159452 | 3  | 0.889263529 |
| 1420 | OtCSo3 | 1SSbcA | COPD | genus.Alloprevotella.id.961                   | Inverse variance weighted | 0.768599225 | 4  | 0.942607511 |
| 1421 | oU56W6 | 1SSbcA | COPD | family.Peptostreptococcaceae.id.2042          | MR Egger                  | 10.13823767 | 11 | 0.517997174 |
| 1422 | oU56W6 | 1SSbcA | COPD | family.Peptostreptococcaceae.id.2042          | Inverse variance weighted | 11.41717579 | 12 | 0.493544843 |
| 1423 | Oxkiqb | 1SSbcA | COPD | order.Clostridiales.id.1863                   | MR Egger                  | 17.69002765 | 9  | 0.038944906 |
| 1424 | Oxkiqb | 1SSbcA | COPD | order.Clostridiales.id.1863                   | Inverse variance weighted | 19.07243401 | 10 | 0.039352248 |
| 1425 | P9709V | 1SSbcA | COPD | genus..Eubacteriumhalliigroup.id.11338        | MR Egger                  | 29.86715951 | 12 | 0.002923892 |
| 1426 | P9709V | 1SSbcA | COPD | genus..Eubacteriumhalliigroup.id.11338        | Inverse variance weighted | 29.87380395 | 13 | 0.004910883 |
| 1427 | PcT6eJ | 1SSbcA | COPD | phylum.Cyanobacteria.id.1500                  | MR Egger                  | 3.638519531 | 6  | 0.725458299 |
| 1428 | PcT6eJ | 1SSbcA | COPD | phylum.Cyanobacteria.id.1500                  | Inverse variance weighted | 3.645015549 | 7  | 0.819635459 |

|      | A      | B      | C    | D                                                 | E                         | F           | G  | H           |
|------|--------|--------|------|---------------------------------------------------|---------------------------|-------------|----|-------------|
| 1429 | pCXx5P | 1SSbcA | COPD | genus.Phascolarctobacterium.id.2168               | MR Egger                  | 3.352708842 | 6  | 0.763451704 |
| 1430 | pCXx5P | 1SSbcA | COPD | genus.Phascolarctobacterium.id.2168               | Inverse variance weighted | 7.930641343 | 7  | 0.338749636 |
| 1431 | PGIGHi | 1SSbcA | COPD | genus.LachnospiraceaeUCG008.id.11328              | MR Egger                  | 5.459675194 | 7  | 0.604052159 |
| 1432 | PGIGHi | 1SSbcA | COPD | genus.LachnospiraceaeUCG008.id.11328              | Inverse variance weighted | 6.735132795 | 8  | 0.565460817 |
| 1433 | pXAgfu | 1SSbcA | COPD | family.Acidaminococcaceae.id.2166                 | MR Egger                  | 18.98435471 | 5  | 0.001935077 |
| 1434 | pXAgfu | 1SSbcA | COPD | family.Acidaminococcaceae.id.2166                 | Inverse variance weighted | 19.22343683 | 6  | 0.003802461 |
| 1435 | q1bO5E | 1SSbcA | COPD | genus.Lactobacillus.id.1837                       | MR Egger                  | 16.95678989 | 5  | 0.004582479 |
| 1436 | q1bO5E | 1SSbcA | COPD | genus.Lactobacillus.id.1837                       | Inverse variance weighted | 17.0638809  | 6  | 0.009051318 |
| 1437 | Q3dvBY | 1SSbcA | COPD | genus.Methanobrevibacter.id.123                   | MR Egger                  | 9.504303641 | 3  | 0.023285621 |
| 1438 | Q3dvBY | 1SSbcA | COPD | genus.Methanobrevibacter.id.123                   | Inverse variance weighted | 14.03470918 | 4  | 0.007185098 |
| 1439 | Q46NVk | 1SSbcA | COPD | genus.Intestinibacter.id.11345                    | MR Egger                  | 8.941515602 | 13 | 0.777346117 |
| 1440 | Q46NVk | 1SSbcA | COPD | genus.Intestinibacter.id.11345                    | Inverse variance weighted | 9.051802305 | 14 | 0.827717863 |
| 1441 | qE3Gq8 | 1SSbcA | COPD | genus..Ruminococcustorquesgroup.id.14377          | MR Egger                  | 3.84077085  | 5  | 0.572561378 |
| 1442 | qE3Gq8 | 1SSbcA | COPD | genus..Ruminococcustorquesgroup.id.14377          | Inverse variance weighted | 3.880493576 | 6  | 0.692844968 |
| 1443 | qENaOR | 1SSbcA | COPD | genus.Victivallis.id.2256                         | MR Egger                  | 10.27780605 | 8  | 0.246066455 |
| 1444 | qENaOR | 1SSbcA | COPD | genus.Victivallis.id.2256                         | Inverse variance weighted | 12.68409159 | 9  | 0.177429463 |
| 1445 | QGrGNV | 1SSbcA | COPD | genus.Haemophilus.id.3698                         | MR Egger                  | 19.62770569 | 7  | 0.006432539 |
| 1446 | QGrGNV | 1SSbcA | COPD | genus.Haemophilus.id.3698                         | Inverse variance weighted | 19.76283565 | 8  | 0.011271546 |
| 1447 | qiWbrh | 1SSbcA | COPD | order.Selenomonadales.id.2165                     | MR Egger                  | 6.093150074 | 10 | 0.807377375 |
| 1448 | qiWbrh | 1SSbcA | COPD | order.Selenomonadales.id.2165                     | Inverse variance weighted | 8.317556602 | 11 | 0.684606744 |
| 1449 | QjakFr | 1SSbcA | COPD | genus.LachnospiraceaeFCS020group.id.11314         | MR Egger                  | 17.86138984 | 10 | 0.057347298 |
| 1450 | QjakFr | 1SSbcA | COPD | genus.LachnospiraceaeFCS020group.id.11314         | Inverse variance weighted | 19.59078905 | 11 | 0.051278663 |
| 1451 | Qyd7XB | 1SSbcA | COPD | genus..Eubacteriumxylanophilumgroup.id.14375      | MR Egger                  | 10.97414964 | 7  | 0.139750583 |
| 1452 | Qyd7XB | 1SSbcA | COPD | genus..Eubacteriumxylanophilumgroup.id.14375      | Inverse variance weighted | 11.84480178 | 8  | 0.158263935 |
| 1453 | R6RQXL | 1SSbcA | COPD | genus..Ruminococcusgnavusgroup.id.14376           | MR Egger                  | 12.15970073 | 9  | 0.204455168 |
| 1454 | R6RQXL | 1SSbcA | COPD | genus..Ruminococcusgnavusgroup.id.14376           | Inverse variance weighted | 12.26485687 | 10 | 0.267721656 |
| 1455 | R7oLoV | 1SSbcA | COPD | genus.RuminococcaceaeUCG011.id.11368              | MR Egger                  | 3.322039895 | 5  | 0.650469112 |
| 1456 | R7oLoV | 1SSbcA | COPD | genus.RuminococcaceaeUCG011.id.11368              | Inverse variance weighted | 5.988850094 | 6  | 0.424440264 |
| 1457 | RKITkD | 1SSbcA | COPD | genus.Bifidobacterium.id.436                      | MR Egger                  | 13.70407888 | 9  | 0.133247944 |
| 1458 | RKITkD | 1SSbcA | COPD | genus.Bifidobacterium.id.436                      | Inverse variance weighted | 18.66994755 | 10 | 0.044660731 |
| 1459 | rlb7o5 | 1SSbcA | COPD | genus..Eubacteriumcoprostanoligenesgroup.id.11375 | MR Egger                  | 10.78647701 | 10 | 0.374393692 |
| 1460 | rlb7o5 | 1SSbcA | COPD | genus..Eubacteriumcoprostanoligenesgroup.id.11375 | Inverse variance weighted | 14.29608207 | 11 | 0.217040839 |
| 1461 | RmoHnu | 1SSbcA | COPD | genus.Ruminiclostridium9.id.11357                 | MR Egger                  | 4.345196026 | 6  | 0.630070195 |
| 1462 | RmoHnu | 1SSbcA | COPD | genus.Ruminiclostridium9.id.11357                 | Inverse variance weighted | 6.1140614   | 7  | 0.526496015 |
| 1463 | rsbOlB | 1SSbcA | COPD | order.MollicutesRF9.id.11579                      | MR Egger                  | 6.200255833 | 10 | 0.798167289 |
| 1464 | rsbOlB | 1SSbcA | COPD | order.MollicutesRF9.id.11579                      | Inverse variance weighted | 9.54382835  | 11 | 0.571825186 |
| 1465 | Rv99Lm | 1SSbcA | COPD | genus..Eubacteriumbrachygroup.id.11296            | MR Egger                  | 14.48511794 | 8  | 0.069964893 |
| 1466 | Rv99Lm | 1SSbcA | COPD | genus..Eubacteriumbrachygroup.id.11296            | Inverse variance weighted | 17.46096391 | 9  | 0.041968047 |
| 1467 | sF7W2L | 1SSbcA | COPD | genus.Howardella.id.2000                          | MR Egger                  | 3.969348612 | 7  | 0.783301016 |
| 1468 | sF7W2L | 1SSbcA | COPD | genus.Howardella.id.2000                          | Inverse variance weighted | 5.031841291 | 8  | 0.754167533 |
| 1469 | sFxDb3 | 1SSbcA | COPD | order.Burkholderiales.id.2874                     | MR Egger                  | 10.77989529 | 7  | 0.148512207 |
| 1470 | sFxDb3 | 1SSbcA | COPD | order.Burkholderiales.id.2874                     | Inverse variance weighted | 11.75061041 | 8  | 0.162682685 |
| 1471 | Sgv0J4 | 1SSbcA | COPD | family.Victivallaceae.id.2255                     | MR Egger                  | 3.732561868 | 9  | 0.92811683  |
| 1472 | Sgv0J4 | 1SSbcA | COPD | family.Victivallaceae.id.2255                     | Inverse variance weighted | 4.374121675 | 10 | 0.928895665 |
| 1473 | Sp09Ka | 1SSbcA | COPD | family.Porphyromonadaceae.id.943                  | MR Egger                  | 15.32393078 | 7  | 0.032064145 |
| 1474 | Sp09Ka | 1SSbcA | COPD | family.Porphyromonadaceae.id.943                  | Inverse variance weighted | 16.27504916 | 8  | 0.038608299 |
| 1475 | staWrf | 1SSbcA | COPD | order.Rhodospirillales.id.2667                    | MR Egger                  | 7.742058148 | 11 | 0.73620662  |
| 1476 | staWrf | 1SSbcA | COPD | order.Rhodospirillales.id.2667                    | Inverse variance weighted | 8.168357767 | 12 | 0.771839244 |
| 1477 | szt6bn | 1SSbcA | COPD | class.Coriobacteriia.id.809                       | MR Egger                  | 10.9285076  | 12 | 0.535055359 |
| 1478 | szt6bn | 1SSbcA | COPD | class.Coriobacteriia.id.809                       | Inverse variance weighted | 11.20384498 | 13 | 0.59374539  |
| 1479 | T35lgz | 1SSbcA | COPD | family.Oxalobacteraceae.id.2966                   | MR Egger                  | 27.93017804 | 12 | 0.005663626 |

|      | A      | B      | C    | D                                           | E                         | F           | G  | H           |
|------|--------|--------|------|---------------------------------------------|---------------------------|-------------|----|-------------|
| 1480 | T35lgz | 1SSbcA | COPD | family.Oxalobacteraceae.id.2966             | Inverse variance weighted | 28.70637574 | 13 | 0.007203122 |
| 1481 | T8T6Lu | 1SSbcA | COPD | family.Peptococcaceae.id.2024               | MR Egger                  | 4.764723133 | 7  | 0.688649667 |
| 1482 | T8T6Lu | 1SSbcA | COPD | family.Peptococcaceae.id.2024               | Inverse variance weighted | 4.897979111 | 8  | 0.76842257  |
| 1483 | tbXTaX | 1SSbcA | COPD | genus.ChristensenellaceaeR.7group.id.11283  | MR Egger                  | 10.62029707 | 6  | 0.100844739 |
| 1484 | tbXTaX | 1SSbcA | COPD | genus.ChristensenellaceaeR.7group.id.11283  | Inverse variance weighted | 15.34966337 | 7  | 0.031769502 |
| 1485 | TGrzdF | 1SSbcA | COPD | genus..Eubacteriumfissicatenagroup.id.14373 | MR Egger                  | 9.461250052 | 7  | 0.221213527 |
| 1486 | TGrzdF | 1SSbcA | COPD | genus..Eubacteriumfissicatenagroup.id.14373 | Inverse variance weighted | 9.515804965 | 8  | 0.30066614  |
| 1487 | tkl5vG | 1SSbcA | COPD | genus.Slackia.id.825                        | MR Egger                  | 4.789066625 | 4  | 0.309633164 |
| 1488 | tkl5vG | 1SSbcA | COPD | genus.Slackia.id.825                        | Inverse variance weighted | 4.828563654 | 5  | 0.437158941 |
| 1489 | TIODZI | 1SSbcA | COPD | genus.RuminococcaceaeUCG004.id.11362        | MR Egger                  | 11.90036389 | 9  | 0.218984785 |
| 1490 | TIODZI | 1SSbcA | COPD | genus.RuminococcaceaeUCG004.id.11362        | Inverse variance weighted | 16.40644113 | 10 | 0.088573725 |
| 1491 | TQSpIB | 1SSbcA | COPD | genus.LachnospiraceaeUCG004.id.11324        | MR Egger                  | 7.697752375 | 9  | 0.564868885 |
| 1492 | TQSpIB | 1SSbcA | COPD | genus.LachnospiraceaeUCG004.id.11324        | Inverse variance weighted | 8.212331069 | 10 | 0.608105322 |
| 1493 | tSliO9 | 1SSbcA | COPD | order.Bacteroidales.id.913                  | MR Egger                  | 12.91110219 | 10 | 0.228684763 |
| 1494 | tSliO9 | 1SSbcA | COPD | order.Bacteroidales.id.913                  | Inverse variance weighted | 15.10662499 | 11 | 0.177667448 |
| 1495 | TUj4LC | 1SSbcA | COPD | genus.LachnospiraceaeNC2004group.id.11316   | MR Egger                  | 9.73907783  | 7  | 0.203848148 |
| 1496 | TUj4LC | 1SSbcA | COPD | genus.LachnospiraceaeNC2004group.id.11316   | Inverse variance weighted | 10.25792429 | 8  | 0.247387707 |
| 1497 | uCOF7P | 1SSbcA | COPD | order.Bacillales.id.1674                    | MR Egger                  | 9.03314739  | 5  | 0.107749302 |
| 1498 | uCOF7P | 1SSbcA | COPD | order.Bacillales.id.1674                    | Inverse variance weighted | 9.306517491 | 6  | 0.157059367 |
| 1499 | uHEy8Q | 1SSbcA | COPD | genus.Akkermansia.id.4037                   | MR Egger                  | 16.47025799 | 9  | 0.057687491 |
| 1500 | uHEy8Q | 1SSbcA | COPD | genus.Akkermansia.id.4037                   | Inverse variance weighted | 17.37770743 | 10 | 0.066413025 |
| 1501 | uQYGEB | 1SSbcA | COPD | genus.Parabacteroides.id.954                | MR Egger                  | 0.276931639 | 3  | 0.964306977 |
| 1502 | uQYGEB | 1SSbcA | COPD | genus.Parabacteroides.id.954                | Inverse variance weighted | 0.680296922 | 4  | 0.9537363   |
| 1503 | UsMxlz | 1SSbcA | COPD | class.Verrucomicrobiae.id.4029              | MR Egger                  | 16.46941663 | 9  | 0.057702863 |
| 1504 | UsMxlz | 1SSbcA | COPD | class.Verrucomicrobiae.id.4029              | Inverse variance weighted | 17.37774735 | 10 | 0.066412227 |
| 1505 | UTPK2n | 1SSbcA | COPD | class.Bacteroidia.id.912                    | MR Egger                  | 12.91110219 | 10 | 0.228684763 |
| 1506 | UTPK2n | 1SSbcA | COPD | class.Bacteroidia.id.912                    | Inverse variance weighted | 15.10662499 | 11 | 0.177667448 |
| 1507 | UYJxH8 | 1SSbcA | COPD | genus.Butyrivibrio.id.1993                  | MR Egger                  | 12.46324741 | 13 | 0.490071802 |
| 1508 | UYJxH8 | 1SSbcA | COPD | genus.Butyrivibrio.id.1993                  | Inverse variance weighted | 13.55166861 | 14 | 0.483617312 |
| 1509 | Vd8Fsi | 1SSbcA | COPD | genus.Bacteroides.id.918                    | MR Egger                  | 13.05406933 | 6  | 0.042185312 |
| 1510 | Vd8Fsi | 1SSbcA | COPD | genus.Bacteroides.id.918                    | Inverse variance weighted | 13.06966233 | 7  | 0.070429163 |
| 1511 | vlyGOP | 1SSbcA | COPD | family.Ruminococcaceae.id.2050              | MR Egger                  | 5.234086623 | 8  | 0.73228871  |
| 1512 | vlyGOP | 1SSbcA | COPD | family.Ruminococcaceae.id.2050              | Inverse variance weighted | 5.737520431 | 9  | 0.76587373  |
| 1513 | W49loY | 1SSbcA | COPD | genus.Olsenella.id.822                      | MR Egger                  | 2.457883913 | 8  | 0.963665946 |
| 1514 | W49loY | 1SSbcA | COPD | genus.Olsenella.id.822                      | Inverse variance weighted | 2.502857948 | 9  | 0.980806533 |
| 1515 | w5yhuV | 1SSbcA | COPD | genus.Romboutsia.id.11347                   | MR Egger                  | 8.4162618   | 11 | 0.675601433 |
| 1516 | w5yhuV | 1SSbcA | COPD | genus.Romboutsia.id.11347                   | Inverse variance weighted | 9.762466933 | 12 | 0.636790394 |
| 1517 | WaNFee | 1SSbcA | COPD | genus.Desulfovibrio.id.3173                 | MR Egger                  | 7.960896304 | 8  | 0.437299207 |
| 1518 | WaNFee | 1SSbcA | COPD | genus.Desulfovibrio.id.3173                 | Inverse variance weighted | 9.482425603 | 9  | 0.393984158 |
| 1519 | WCt5pC | 1SSbcA | COPD | genus.Anaerofilum.id.2053                   | MR Egger                  | 8.677992631 | 8  | 0.370183874 |
| 1520 | WCt5pC | 1SSbcA | COPD | genus.Anaerofilum.id.2053                   | Inverse variance weighted | 10.11231527 | 9  | 0.341469453 |
| 1521 | WEMGli | 1SSbcA | COPD | family.Alcaligenaceae.id.2875               | MR Egger                  | 8.864565972 | 8  | 0.353849623 |
| 1522 | WEMGli | 1SSbcA | COPD | family.Alcaligenaceae.id.2875               | Inverse variance weighted | 9.573809598 | 9  | 0.386075402 |
| 1523 | wFbL6J | 1SSbcA | COPD | genus.Marvinbryantia.id.2005                | MR Egger                  | 4.362237011 | 8  | 0.8230524   |
| 1524 | wFbL6J | 1SSbcA | COPD | genus.Marvinbryantia.id.2005                | Inverse variance weighted | 4.521284242 | 9  | 0.873886535 |
| 1525 | wlF1Yn | 1SSbcA | COPD | genus.LachnospiraceaeUCG001.id.11321        | MR Egger                  | 12.45364427 | 11 | 0.330527296 |
| 1526 | wlF1Yn | 1SSbcA | COPD | genus.LachnospiraceaeUCG001.id.11321        | Inverse variance weighted | 14.31020898 | 12 | 0.28133912  |
| 1527 | wJFco0 | 1SSbcA | COPD | genus.Veillonella.id.2198                   | MR Egger                  | 7.931439542 | 3  | 0.047450099 |
| 1528 | wJFco0 | 1SSbcA | COPD | genus.Veillonella.id.2198                   | Inverse variance weighted | 10.25524191 | 4  | 0.036340794 |
| 1529 | wn5rK2 | 1SSbcA | COPD | genus.ErysipelotrichaceaeUCG003.id.11384    | MR Egger                  | 18.69547594 | 14 | 0.176914646 |
| 1530 | wn5rK2 | 1SSbcA | COPD | genus.ErysipelotrichaceaeUCG003.id.11384    | Inverse variance weighted | 29.26150802 | 15 | 0.014881435 |

|      | A      | B      | C    | D                                         | E                         | F           | G  | H           |
|------|--------|--------|------|-------------------------------------------|---------------------------|-------------|----|-------------|
| 1531 | wQYhwp | 1SSbcA | COPD | genus.Odoribacter.id.952                  | MR Egger                  | 7.57170359  | 5  | 0.181473193 |
| 1532 | wQYhwp | 1SSbcA | COPD | genus.Odoribacter.id.952                  | Inverse variance weighted | 12.63738936 | 6  | 0.049169562 |
| 1533 | WvdQyb | 1SSbcA | COPD | genus..Eubacteriumeligensgroup.id.14372   | MR Egger                  | 1.955269474 | 4  | 0.743985909 |
| 1534 | WvdQyb | 1SSbcA | COPD | genus..Eubacteriumeligensgroup.id.14372   | Inverse variance weighted | 6.954727014 | 5  | 0.224029152 |
| 1535 | X4kHrP | 1SSbcA | COPD | class.Betaproteobacteria.id.2867          | MR Egger                  | 12.15037541 | 8  | 0.144619561 |
| 1536 | X4kHrP | 1SSbcA | COPD | class.Betaproteobacteria.id.2867          | Inverse variance weighted | 12.76921688 | 9  | 0.173330017 |
| 1537 | xCuklr | 1SSbcA | COPD | genus.Dialister.id.2183                   | MR Egger                  | 9.972553328 | 9  | 0.352711752 |
| 1538 | xCuklr | 1SSbcA | COPD | genus.Dialister.id.2183                   | Inverse variance weighted | 13.42094473 | 10 | 0.201078979 |
| 1539 | Xtktja | 1SSbcA | COPD | family.Pasteurellaceae.id.3689            | MR Egger                  | 20.84386914 | 11 | 0.035025171 |
| 1540 | Xtktja | 1SSbcA | COPD | family.Pasteurellaceae.id.3689            | Inverse variance weighted | 24.78664227 | 12 | 0.015866903 |
| 1541 | XTu0EY | 1SSbcA | COPD | genus.Intestinimonas.id.2062              | MR Egger                  | 11.26616804 | 14 | 0.665011379 |
| 1542 | XTu0EY | 1SSbcA | COPD | genus.Intestinimonas.id.2062              | Inverse variance weighted | 11.94418312 | 15 | 0.683248974 |
| 1543 | XVFzMF | 1SSbcA | COPD | genus.Holdemania.id.2157                  | MR Egger                  | 11.47363272 | 11 | 0.404478031 |
| 1544 | XVFzMF | 1SSbcA | COPD | genus.Holdemania.id.2157                  | Inverse variance weighted | 12.55413653 | 12 | 0.40226254  |
| 1545 | y0FJ9U | 1SSbcA | COPD | genus.LachnospiraceaeND3007group.id.11317 | MR Egger                  | 0.041454639 | 1  | 0.838662871 |
| 1546 | y0FJ9U | 1SSbcA | COPD | genus.LachnospiraceaeND3007group.id.11317 | Inverse variance weighted | 1.544693301 | 2  | 0.461927812 |
| 1547 | Y7cF3n | 1SSbcA | COPD | family.Methanobacteriaceae.id.121         | MR Egger                  | 7.650011413 | 6  | 0.264881715 |
| 1548 | Y7cF3n | 1SSbcA | COPD | family.Methanobacteriaceae.id.121         | Inverse variance weighted | 13.44175589 | 7  | 0.062049144 |
| 1549 | yakWtY | 1SSbcA | COPD | genus.Butyricoccus.id.2055                | MR Egger                  | 2.931261236 | 6  | 0.817423536 |
| 1550 | yakWtY | 1SSbcA | COPD | genus.Butyricoccus.id.2055                | Inverse variance weighted | 8.239002329 | 7  | 0.31199159  |
| 1551 | yerINC | 1SSbcA | COPD | genus.RuminococcaceaeUCG005.id.11363      | MR Egger                  | 17.41660076 | 12 | 0.134586695 |
| 1552 | yerINC | 1SSbcA | COPD | genus.RuminococcaceaeUCG005.id.11363      | Inverse variance weighted | 17.41868095 | 13 | 0.180864303 |
| 1553 | yfxJv6 | 1SSbcA | COPD | family.Erysipelotrichaceae.id.2149        | MR Egger                  | 16.00046566 | 11 | 0.141113594 |
| 1554 | yfxJv6 | 1SSbcA | COPD | family.Erysipelotrichaceae.id.2149        | Inverse variance weighted | 16.10746141 | 12 | 0.186363569 |
| 1555 | ygbSF7 | 1SSbcA | COPD | genus.Fusicatenibacter.id.11305           | MR Egger                  | 10.71260594 | 16 | 0.826867585 |
| 1556 | ygbSF7 | 1SSbcA | COPD | genus.Fusicatenibacter.id.11305           | Inverse variance weighted | 12.77631729 | 17 | 0.751026655 |
| 1557 | ylev3A | 1SSbcA | COPD | family.FamilyXIII.id.1957                 | MR Egger                  | 2.473303582 | 5  | 0.780510128 |
| 1558 | ylev3A | 1SSbcA | COPD | family.FamilyXIII.id.1957                 | Inverse variance weighted | 2.616965795 | 6  | 0.855154527 |
| 1559 | yLt27i | 1SSbcA | COPD | genus.Senegalimassilia.id.11160           | MR Egger                  | 3.654308891 | 3  | 0.301293297 |
| 1560 | yLt27i | 1SSbcA | COPD | genus.Senegalimassilia.id.11160           | Inverse variance weighted | 3.679869945 | 4  | 0.451060493 |
| 1561 | YXZeGZ | 1SSbcA | COPD | genus.Alistipes.id.968                    | MR Egger                  | 10.1670686  | 10 | 0.425960174 |
| 1562 | YXZeGZ | 1SSbcA | COPD | genus.Alistipes.id.968                    | Inverse variance weighted | 10.79721437 | 11 | 0.460405216 |
| 1563 | YYHfMs | 1SSbcA | COPD | genus.Gordonibacter.id.821                | MR Egger                  | 6.61011672  | 9  | 0.677638516 |
| 1564 | YYHfMs | 1SSbcA | COPD | genus.Gordonibacter.id.821                | Inverse variance weighted | 6.918838603 | 10 | 0.733084233 |
| 1565 | zaZf8A | 1SSbcA | COPD | genus.Oscillospira.id.2064                | MR Egger                  | 4.734390561 | 6  | 0.578302494 |
| 1566 | zaZf8A | 1SSbcA | COPD | genus.Oscillospira.id.2064                | Inverse variance weighted | 6.665937624 | 7  | 0.464470662 |
| 1567 | ZJXDpG | 1SSbcA | COPD | class.Erysipelotrichia.id.2147            | MR Egger                  | 16.00046566 | 11 | 0.141113594 |
| 1568 | ZJXDpG | 1SSbcA | COPD | class.Erysipelotrichia.id.2147            | Inverse variance weighted | 16.10746141 | 12 | 0.186363569 |
| 1569 | zkWLyl | 1SSbcA | COPD | genus.Allisonella.id.2174                 | MR Egger                  | 6.888181701 | 6  | 0.33131208  |
| 1570 | zkWLyl | 1SSbcA | COPD | genus.Allisonella.id.2174                 | Inverse variance weighted | 9.534527039 | 7  | 0.216520895 |

|    | A                                                         | B                                                         | C           | D          | E         | F                                                                                                                                                                                                                                                                                           | G                                                                                                                                                                     |
|----|-----------------------------------------------------------|-----------------------------------------------------------|-------------|------------|-----------|---------------------------------------------------------------------------------------------------------------------------------------------------------------------------------------------------------------------------------------------------------------------------------------------|-----------------------------------------------------------------------------------------------------------------------------------------------------------------------|
| 1  | Supplementary table S8: Results of leave-one-out analysis |                                                           |             |            |           |                                                                                                                                                                                                                                                                                             |                                                                                                                                                                       |
| 2  | exposure                                                  | outcome                                                   | id.exposure | id.outcome | under0.05 | c_p                                                                                                                                                                                                                                                                                         | c_SNP                                                                                                                                                                 |
| 3  | genus.Eggerthella.id.819                                  | Forced expiratory volume in 1-second (FEV1), Best measure | 0aMbT3      | vLGi8p     | 0         | 0.442801112945344 0.991899112280653 0.844844082154494 0.634438967285482 0.786741947803933 0.979856647147521 0.738430001186637 0.84068475238644 0.722285822027096 0.904395170842777 0.742527805182301                                                                                        | rs112205261 rs13070736 rs1784446 rs2223081 rs2240838 rs2877457 rs3851328 rs4985746 rs6430926 rs67490567 rs76663501                                                    |
| 4  | genus.Lactococcus.id.1851                                 | Forced expiratory volume in 1-second (FEV1), Best measure | 0heWA4      | vLGi8p     | 3         | 0.0455630660004152 0.130191695594538 0.0647753995717936 0.181428571420429 0.0490594449344631 0.117799410787874 0.125540226007595 0.0397336233954039 0.286331172280844                                                                                                                       | rs10417872 rs123059 rs12621813 rs17168302 rs2293361 rs4766997 rs55910161 rs6674304 rs7992246                                                                          |
| 5  | genus.DefluviitaleaceaeUCG011.id.11287                    | Forced expiratory volume in 1-second (FEV1), Best measure | 0lsDJy      | vLGi8p     | 0         | 0.46382831455477 0.668155539737049 0.759113812106017 0.338471709064702 0.37798624150852 0.597911063467045 0.109505307090037 0.458065564047265 0.629200199942335                                                                                                                             | rs112893842 rs1582238 rs2892880 rs4344384 rs4677103 rs55658617 rs72731813 rs9608282 rs9725395                                                                         |
| 6  | genus.Flavonifractor.id.2059                              | Forced expiratory volume in 1-second (FEV1), Best measure | 0ngO8p      | vLGi8p     | 0         | 0.938278045131724 0.88171513906264 0.381904347736877 0.991933577471691 0.26775390951128                                                                                                                                                                                                     | rs114873521 rs11811696 rs12030302 rs34066017 rs806808                                                                                                                 |
| 7  | genus.Lachnospira.id.2004                                 | Forced expiratory volume in 1-second (FEV1), Best measure | 0rTnk2      | vLGi8p     | 0         | 0.833799609886881 0.269378391514783 0.221498846923049 0.540999065559885 0.574044380117883 0.62694941611945                                                                                                                                                                                  | rs13157098 rs159484 rs2520509 rs4686798 rs4923324 rs56791201                                                                                                          |
| 8  | phylum.Firmicutes.id.1672                                 | Forced expiratory volume in 1-second (FEV1), Best measure | 0rWmph      | vLGi8p     | 0         | 0.463021320151572 0.562718443623027 0.37107081667305 0.772999823472054 0.738969526742521 0.356313953217301 0.40782284878542 0.491399058061971 0.53001405083602 0.40470496126308 0.240120336845979 0.388148156074079 0.430832422781409 0.390197255412505 0.762825480324201 0.527393424771932 | rs112334273 rs2009919 rs2273429 rs2332027 rs2547978 rs36111799 rs3792064 rs3852931 rs4750583 rs56199908 rs6814436 rs6815608 rs7247191 rs72738886 rs72771021 rs8085381 |
| 9  | genus.Hungatella.id.11306                                 | Forced expiratory volume in 1-second (FEV1), Best measure | 0Vfsi1      | vLGi8p     | 0         | 0.123330318029449 0.432789493961281 0.736717709195189 0.418381294032695 0.35180536838566                                                                                                                                                                                                    | rs10044993 rs13128780 rs13249325 rs17092615 rs72759041                                                                                                                |
| 10 | genus.FamilyXIIIUCG001.id.11294                           | Forced expiratory volume in 1-second (FEV1), Best measure | 1rpkul      | vLGi8p     | 0         | 0.403707900092951 0.455951179701996 0.375161612194032 0.384921922416057 0.855628891113777 0.190534802959009 0.162347429059231 0.401877071200917                                                                                                                                             | rs112362903 rs12049454 rs1426266 rs3842897 rs62414802 rs7119679 rs76463770 rs8076666                                                                                  |
| 11 | genus.Escherichia.Shigella.id.3504                        | Forced expiratory volume in 1-second (FEV1), Best measure | 1uqUdL      | vLGi8p     | 4         | 0.152207306065398 0.0651581897250382 0.0524979860828198 0.145185749825956 0.0357547142667551 0.040221425072704 0.0597695284159111 0.0223526045190258 0.0498867876226592 0.0574593106611978                                                                                                  | rs112767262 rs113127095 rs113513883 rs1154904 rs118526 rs2798105 rs4731451 rs57024273 rs592299 rs73208162                                                             |
| 12 | family.Streptococcaceae.id.1850                           | Forced expiratory volume in 1-second (FEV1), Best measure | 1zf0TZ      | vLGi8p     | 0         | 0.724730836045355 0.932855532709624 0.992017751576866 0.74038018012723 0.521107057091293 0.861129596966583 0.707283623846084 0.91539021769753 0.945949768645539 0.890095555483473 0.617560836256541 0.842179196145276                                                                       | rs10028567 rs11110281 rs2370083 rs35344081 rs4968759 rs57646748 rs6806351 rs72739637 rs77968078 rs7916711 rs957755 rs9903102                                          |
| 13 | genus.Holdemanella.id.11393                               | Forced expiratory volume in 1-second (FEV1), Best measure | 20HLOT      | vLGi8p     | 0         | 0.424740551368608 0.817740331711996 0.652791358864718 0.495061747505829 0.358753696908426 0.197649283455719 0.609009404166721 0.50215145913027 0.49886311836993 0.568812579082315 0.590567190539884                                                                                         | rs12513188 rs17586763 rs1926302 rs34187114 rs35228298 rs4541991 rs607782 rs62113381 rs73011279 rs75764681 rs8113760                                                   |
| 14 | genus.Ruminococcus2.id.11374                              | Forced expiratory volume in 1-second (FEV1), Best measure | 2GJP3o      | vLGi8p     | 0         | 0.948427957897752 0.819479014170429 0.963446237241734 0.798414321361414 0.597405156873434 0.990045700629044 0.798079896636638 0.942472070638531 0.785196933219885 0.855016923026205 0.712664559623379 0.722604827052837 0.853929028007377 0.951047353093492                                 | rs12406309 rs12986628 rs1819812 rs2368224 rs2846589 rs2997412 rs4400279 rs4799823 rs55707116 rs58681734 rs61791565 rs7635831 rs7693984 rs78120384                     |
| 15 | phylum.Euryarchaeota.id.55                                | Forced expiratory volume in 1-second (FEV1), Best measure | 2neTKK      | vLGi8p     | 0         | 0.461732745726466 0.437039187745523 0.573089963204766 0.508336429119737 0.380465227264445 0.544910561170134 0.292529713740488 0.307946907523794 0.324260404368866 0.413866830485162 0.596995102358303                                                                                       | rs11022995 rs34928225 rs45498998 rs56131665 rs6064552 rs6508769 rs7015093 rs76029318 rs7635189 rs77658038 rs894996                                                    |
| 16 | genus.Coproccoccus2.id.11302                              | Forced expiratory volume in 1-second (FEV1), Best measure | 2vslhf      | vLGi8p     | 0         | 0.211036230471629 0.803806491102136 0.6642220286037 0.61874647638309 0.993339348729679 0.4778738726432 0.330811583415382 0.790689367531378                                                                                                                                                  | rs10070053 rs12634070 rs2482516 rs35890118 rs61823518 rs6677933 rs72680320 rs9426473                                                                                  |
| 17 | family.Christensenellaceae.id.1866                        | Forced expiratory volume in 1-second (FEV1), Best measure | 31r1VV      | vLGi8p     | 0         | 0.624074348296849 0.688357425957419 0.950976144439863 0.777849964661917 0.73867624174114 0.895316523152117 0.637279735802064 0.661892974800863 0.786031784674777 0.939241354206525 0.965884370715325                                                                                        | rs117186816 rs12380890 rs12657403 rs4076564 rs62573205 rs7211194 rs72706624 rs77867022 rs870002 rs892686 rs9608766                                                    |

|    | A                                           | B                                                         | C      | D      | E  | F                                                                                                                                                                                                                                                                                                                                  | G                                                                                                                                                                                         |
|----|---------------------------------------------|-----------------------------------------------------------|--------|--------|----|------------------------------------------------------------------------------------------------------------------------------------------------------------------------------------------------------------------------------------------------------------------------------------------------------------------------------------|-------------------------------------------------------------------------------------------------------------------------------------------------------------------------------------------|
| 18 | genus..Eubacteriumrectalegroup.id.14374     | Forced expiratory volume in 1-second (FEV1), Best measure | 37ZEpl | vLGi8p | 0  | 0.376036096634196 0.201771780052658 0.576297517389083 0.906718608871022 0.669934690127497 0.563419773808677 0.418052989708429 0.193772322726028                                                                                                                                                                                    | rs10248854 rs10797540 rs143694765 rs2884897 rs314726 rs35398954 rs59427698 rs62547233                                                                                                     |
| 19 | class.Actinobacteria.id.419                 | Forced expiratory volume in 1-second (FEV1), Best measure | 3cOJ1f | vLGi8p | 0  | 0.353216121502015 0.42657985671398 0.0860747248001611 0.259292598109696 0.319901421004489 0.293467151220497 0.178977619779332 0.220683642734943 0.358394432004381 0.172510598655937 0.0716992214957975 0.146975180639566 0.322719181231917                                                                                         | rs11655079 rs11745923 rs12049045 rs134366 rs1376754 rs1515761 rs4945008 rs6660520 rs72767435 rs80083040 rs8047955 rs857444 rs961091                                                       |
| 20 | class.Methanobacteria.id.119                | Forced expiratory volume in 1-second (FEV1), Best measure | 3Oo7Td | vLGi8p | 0  | 0.427492095982764 0.645029116635225 0.295436006894644 0.251854361318758 0.787733286158593 0.747562854145554 0.530630056795212 0.185039633419839                                                                                                                                                                                    | rs10424197 rs4257531 rs56131665 rs6508769 rs6776814 rs73068003 rs73457410 rs894996                                                                                                        |
| 21 | genus.Subdoligranulum.id.2070               | Forced expiratory volume in 1-second (FEV1), Best measure | 3tgfXE | vLGi8p | 0  | 0.918905352364911 0.61242526509296 0.999388326881276 0.86233212563781 0.767655031646558 0.785960001061925 0.825785245670927 0.786023408341533 0.925887524770189 0.394748302854377                                                                                                                                                  | rs10065321 rs10497836 rs1667315 rs2114677 rs2171249 rs35940633 rs4347804 rs6555306 rs75158211 rs76528319                                                                                  |
| 22 | genus.Bilophila.id.3170                     | Forced expiratory volume in 1-second (FEV1), Best measure | 4zBtt2 | vLGi8p | 0  | 0.926710931609559 0.973024632412074 0.989224587260962 0.6861748778678 0.295970554270994 0.943527720702325 0.73010151737098 0.837870246457356 0.863701384768158 0.693376941460717 0.808057866705625 0.760663886060188                                                                                                               | rs11069458 rs1241171 rs1571225 rs1969927 rs3827020 rs4798126 rs542415 rs60178956 rs6793291 rs72676854 rs7802841 rs9899990                                                                 |
| 23 | genus.RuminococcaceaeUCG014.id.11371        | Forced expiratory volume in 1-second (FEV1), Best measure | 5lXuob | vLGi8p | 0  | 0.554672641949363 0.790252628349519 0.834412080250751 0.762491242830146 0.648378413887807 0.905207140371874 0.520898787929601 0.519031292521454 0.894894461864653 0.97697477299443 0.717165153236482                                                                                                                               | rs10495392 rs10791168 rs10941294 rs115777838 rs12638134 rs34402072 rs56105232 rs72809222 rs73186226 rs853612 rs995642                                                                     |
| 24 | genus.Streptococcus.id.1853                 | Forced expiratory volume in 1-second (FEV1), Best measure | 5qEcKL | vLGi8p | 0  | 0.825143281444449 0.562777490922373 0.677573612605753 0.741165150607787 0.92182290586611 0.900811288170097 0.340441160125794 0.637912844621044 0.298127247308954 0.525496268499721 0.406975951980913 0.562177820760982 0.721333468789208 0.750543694650815                                                                         | rs10028567 rs10448310 rs11110281 rs11720390 rs11764382 rs17708276 rs1918540 rs2370083 rs4968759 rs57646748 rs6806351 rs72739637 rs7916711 rs9903102                                       |
| 25 | genus.Oscillibacter.id.2063                 | Forced expiratory volume in 1-second (FEV1), Best measure | 5TN0Z7 | vLGi8p | 0  | 0.333813452247193 0.739807985042061 0.310719899097002 0.385250024067169 0.219798403482824 0.43649455402012 0.229002781500276 0.48624891360335 0.153352225934708 0.431862194885984 0.61230047080395                                                                                                                                 | rs11627628 rs11990279 rs133832 rs16866406 rs16934185 rs234108 rs36095275 rs61883564 rs62206502 rs75453768 rs761240                                                                        |
| 26 | genus.Catenibacterium.id.2153               | Forced expiratory volume in 1-second (FEV1), Best measure | 5XtLwc | vLGi8p | 0  | 0.994046245565016 0.439052442689086 0.78351182316211 0.906230284734273 0.317513549667136                                                                                                                                                                                                                                           | rs12404911 rs212393 rs73128290 rs77285108 rs7742829                                                                                                                                       |
| 27 | phylum.Tenericutes.id.3919                  | Forced expiratory volume in 1-second (FEV1), Best measure | 6gX3qe | vLGi8p | 0  | 0.83095760000897 0.159870490858447 0.720860661026086 0.304238799358615 0.501752366327439 0.784331119670056 0.596425498481921 0.488522673683372 0.552311350750024 0.752053509281804 0.848756998293896 0.520379841656326                                                                                                             | rs10108398 rs11890098 rs12566890 rs17214486 rs2464826 rs28537087 rs3768491 rs4885016 rs6043847 rs72901605 rs74603314 rs78169027                                                           |
| 28 | family.Desulfovibrionaceae.id.3169          | Forced expiratory volume in 1-second (FEV1), Best measure | 6jMcBB | vLGi8p | 10 | 0.0363457603510467 0.00287439816904295 0.00609853587344205 0.00246250433201416 0.00162349746521395 0.00241064524267031 0.00125684716475133 0.0127641762798669 0.0036240357099867 0.0116054230557089                                                                                                                                | rs112381107 rs11599763 rs17791387 rs2692012 rs2838334 rs3935584 rs4506934 rs6058181 rs72647048 rs9928243                                                                                  |
| 29 | genus.Copro bacter .id.949                  | Forced expiratory volume in 1-second (FEV1), Best measure | 6mlWxZ | vLGi8p | 0  | 0.181815968055894 0.195973344594974 0.307631312394096 0.161252458641404 0.13773925302318 0.14658551585111 0.17945141957022 0.0559464767153332 0.211328872633912 0.151511396327427 0.055451024645431                                                                                                                                | rs11532348 rs12684609 rs12996055 rs143662916 rs189356 rs213863 rs28402691 rs305411 rs3828477 rs72821405 rs74919520                                                                        |
| 30 | genus..Eubacteriumruminantiumgroup.id.11340 | Forced expiratory volume in 1-second (FEV1), Best measure | 77YJKV | vLGi8p | 0  | 0.233749270983987 0.233495558197891 0.29911883827459 0.119767119032834 0.117827315679236 0.221882808386378 0.348707373072703 0.439637787648917 0.313183852233938 0.152698212712631 0.275945134555908 0.347976728391242 0.406259056682476 0.226753992702417 0.221335631646313 0.182431322683987 0.265287478131898 0.305051443115752 | rs10131724 rs10923018 rs11637981 rs13025464 rs139749 rs16891896 rs17519472 rs209813 rs2116427 rs2229917 rs2418654 rs2817174 rs57340348 rs606117 rs6676699 rs7000472 rs72836424 rs73139629 |
| 31 | genus.Collinsella.id.815                    | Forced expiratory volume in 1-second (FEV1), Best measure | 7aTYpg | vLGi8p | 0  | 0.545655792629855 0.986708825387534 0.629190250043755 0.78088938683272 0.676355801919704 0.703353688372628 0.980091432660525 0.787086871986016 0.982500675940812                                                                                                                                                                   | rs10890671 rs11597285 rs1496626 rs149807560 rs2103510 rs62448871 rs73052258 rs75672793 rs9541268                                                                                          |
| 32 | genus..Clostridiuminnocuumgroup.id.14397    | Forced expiratory volume in 1-second (FEV1), Best measure | 7dq OH | vLGi8p | 0  | 0.76758238957945 0.8398170672023 0.92621442221174 0.845999467694679 0.941973465589695 0.908170499519958 0.870713856459273 0.831771403929344 0.987783409318184                                                                                                                                                                      | rs10074000 rs10506058 rs1942371 rs40656 rs4869133 rs61267978 rs6577484 rs6890185 rs77845139                                                                                               |
| 33 | phylum.Proteobacteria.id.2375               | Forced expiratory volume in 1-second (FEV1), Best measure | 7ioeKt | vLGi8p | 0  | 0.524050127344578 0.443242706607205 0.627002307556001 0.324214740573314 0.441384358193444 0.46817141782868 0.136372893976705 0.326714519256432 0.150812253936531 0.689020136472964 0.302810160061779                                                                                                                               | rs10750258 rs11126162 rs11715072 rs12467198 rs2347697 rs2532663 rs3890996 rs4340090 rs6707783 rs72771021 rs922773                                                                         |

|    | A                                          | B                                                         | C      | D      | E | F                                                                                                                                                                                                                                                                        | G                                                                                                                                                         |
|----|--------------------------------------------|-----------------------------------------------------------|--------|--------|---|--------------------------------------------------------------------------------------------------------------------------------------------------------------------------------------------------------------------------------------------------------------------------|-----------------------------------------------------------------------------------------------------------------------------------------------------------|
| 34 | genus.Anaerostipes.id.1991                 | Forced expiratory volume in 1-second (FEV1), Best measure | 80h8vf | vLGi8p | 0 | 0.247087103833219 0.376275554366668 0.234176557907117 0.128026316122061 0.280277779438753 0.235638909855965 0.285744539250073 0.370009906780075 0.0820053429953342 0.128229790357132 0.0823232987894053 0.380794639238908                                                | rs10502061 rs2014785 rs2396460 rs2804244 rs3900776 rs62157625 rs62215703 rs6474958 rs6726833 rs6854026 rs7193624 rs78735375                               |
| 35 | genus.Coproccoccus3.id.11303               | Forced expiratory volume in 1-second (FEV1), Best measure | 8jKldu | vLGi8p | 0 | 0.515865676800371 0.572511867930802 0.824571074266657 0.66845209930699 0.828999817264397 0.470379144322157 0.995708230756067 0.374607986230899 0.828459348525776                                                                                                         | rs10810043 rs11077359 rs11080344 rs13247359 rs13394391 rs178271 rs4575475 rs7521171 rs8100692                                                             |
| 36 | genus.Paraprevotella.id.962                | Forced expiratory volume in 1-second (FEV1), Best measure | 8NULRM | vLGi8p | 0 | 0.818070315257386 0.689764050183963 0.961595266695082 0.79161182234171 0.83171019539224 0.883615690516404 0.951807255052495 0.902566084087374 0.688761592740817 0.818724561750538 0.876019038539658 0.461983725153949                                                    | rs10842464 rs140997932 rs145020347 rs17109926 rs17785622 rs2081023 rs3008582 rs3801748 rs4756632 rs4767113 rs7240324 rs9602779                            |
| 37 | order.Gastranaerophilales.id.1591          | Forced expiratory volume in 1-second (FEV1), Best measure | 9i4tiU | vLGi8p | 0 | 0.97917277231391 0.866024536743944 0.987000266658487 0.808817616120577 0.843312190751034 0.747749058231976 0.141521442502525 0.745218474833164 0.989340969820891                                                                                                         | rs11150282 rs113884518 rs28678345 rs367480 rs4129395 rs789069 rs79790072 rs8028558 rs9864379                                                              |
| 38 | genus.RuminococcaceaeUCG009.id.11366       | Forced expiratory volume in 1-second (FEV1), Best measure | 9s731W | vLGi8p | 0 | 0.447727615019321 0.768009091234854 0.88867838069611 0.661626899863979 0.840425904446256 0.622783212537972 0.616572852263093 0.714194134118613 0.835977357043179 0.611299074192761 0.433122890091949 0.872340672005586                                                   | rs113006825 rs12508214 rs138460696 rs1550196 rs2058609 rs2192926 rs4079028 rs4708333 rs6952765 rs758191 rs78410648 rs9558661                              |
| 39 | genus.Parasutterella.id.2892               | Forced expiratory volume in 1-second (FEV1), Best measure | aclMuF | vLGi8p | 0 | 0.904634838302508 0.68151061367092 0.843789131769959 0.520304450042346 0.827664689500425 0.888883576443124 0.541305297359152 0.804915267292407 0.888587482075619 0.887246369726439 0.972526756831185 0.494882511853785 0.99822788506148 0.850083423856669                | rs10899911 rs11715853 rs2090816 rs2387977 rs35055552 rs55877868 rs6809952 rs6828768 rs7303158 rs7311004 rs7572229 rs78383039 rs8039785 rs823424           |
| 40 | genus.Turicibacter.id.2162                 | Forced expiratory volume in 1-second (FEV1), Best measure | AdsBD9 | vLGi8p | 3 | 0.156394689297789 0.0545705107411625 0.107334963251198 0.0383685838614586 0.0513120218912104 0.0573803418802561 0.132654766366465 0.0469932879107763 0.0267837020221468 0.0799512564277356                                                                               | rs11054680 rs11666533 rs12603364 rs149744580 rs2834977 rs2952020 rs3734633 rs4869133 rs55756211 rs7199484                                                 |
| 41 | order.Bifidobacteriales.id.432             | Forced expiratory volume in 1-second (FEV1), Best measure | aGfu8V | vLGi8p | 0 | 0.122216198738855 0.162325009531256 0.24226679227237 0.617509370161881 0.244443467139934 0.288936848123402 0.147387504949386 0.341237454631036 0.28350309875288 0.129588312356762                                                                                        | rs10831953 rs12446429 rs13020688 rs4957061 rs540489 rs55888705 rs6899771 rs7174549 rs73797465 rs857444                                                    |
| 42 | genus.LachnospiraceaeUCG010.id.11330       | Forced expiratory volume in 1-second (FEV1), Best measure | AKOI7A | vLGi8p | 0 | 0.583257858240241 0.897875128427846 0.30881982506918 0.841665907695174 0.281642101573502 0.692752789331802 0.712879312564815 0.979434056473932 0.686558249826516 0.77533704499605                                                                                        | rs10414815 rs11192447 rs12346653 rs17730011 rs2833528 rs336138 rs4576377 rs72894957 rs74315802 rs9981767                                                  |
| 43 | genus.Faecalibacterium.id.2057             | Forced expiratory volume in 1-second (FEV1), Best measure | aKuChq | vLGi8p | 1 | 0.235029127538673 0.0310669487764983 0.261104539679093 0.0703239431395073 0.219893976844751 0.247302854368894 0.142304033159105 0.321415046583766 0.206846375879324                                                                                                      | rs10927394 rs114946999 rs11776390 rs1271565 rs12753492 rs2835874 rs6910935 rs75499067 rs79656633                                                          |
| 44 | genus.Blautia.id.1992                      | Forced expiratory volume in 1-second (FEV1), Best measure | aKXyAu | vLGi8p | 0 | 0.360942403377245 0.448626553281716 0.286069886082273 0.359726554103271 0.193383962469022 0.32174734854842 0.416526137181336 0.366369031440975 0.398434339963233 0.131337323873955 0.0993379664773052 0.266244123796293                                                  | rs11149971 rs113271346 rs117001700 rs12453000 rs16892041 rs2788271 rs3005511 rs4926264 rs67794373 rs682885 rs72973581 rs7860714                           |
| 45 | genus.Clostridiumsensustricto1.id.1873     | Forced expiratory volume in 1-second (FEV1), Best measure | AN8qjo | vLGi8p | 1 | 0.301660727608583 0.819912993964022 0.48237342550247 0.598068212814289 0.363218907107513 0.0332155497170101 0.488078819236422                                                                                                                                            | rs11264403 rs115807074 rs116847295 rs12341505 rs2795528 rs2817172 rs550843                                                                                |
| 46 | genus..Eubacteriumventriosumgroup.id.11341 | Forced expiratory volume in 1-second (FEV1), Best measure | anDrA2 | vLGi8p | 0 | 0.531120243245181 0.590505745900691 0.240603316571712 0.24527943979574 0.610849463518034 0.435518435096683 0.414019761966514 0.309639447322647 0.288579934036415 0.284388244974797 0.351992834509 0.0980873928092212 0.392200570158107 0.257219501170338                 | rs11617697 rs12964517 rs13082419 rs16884680 rs35179274 rs3809430 rs66746423 rs6704822 rs72783037 rs73615400 rs73849225 rs78250280 rs876734 rs9316536      |
| 47 | genus.RuminococcaceaeNK4A214group.id.11358 | Forced expiratory volume in 1-second (FEV1), Best measure | ASQ2fp | vLGi8p | 0 | 0.324989098377889 0.801344161400309 0.475477204128167 0.739322793619097 0.789986826851526 0.45709467112838 0.913277513484676 0.582516039569755 0.507237818969875 0.639108174030831 0.768128355428235 0.950210019552733 0.755501490396419                                 | rs11241747 rs11586410 rs12642039 rs12731 rs13087692 rs136761 rs147475196 rs35559912 rs4814689 rs5994253 rs62027366 rs6681678 rs7573569                    |
| 48 | genus.Anaerotruncus.id.2054                | Forced expiratory volume in 1-second (FEV1), Best measure | aToCrK | vLGi8p | 2 | 0.376614340471839 0.0435443914997585 0.254314443811498 0.180883253061269 0.166165860523641 0.23733518195518 0.233535507680434 0.191853164704117 0.270098628515882 0.318592411765288 0.0444459178600331 0.286460703666885 0.195077536420771                               | rs10150232 rs11018566 rs115414803 rs1272208 rs1431492 rs17734739 rs34449434 rs4669806 rs6494922 rs6563550 rs7155595 rs8005030 rs9347879                   |
| 49 | family.Prevotellaceae.id.960               | Forced expiratory volume in 1-second (FEV1), Best measure | axDRMS | vLGi8p | 0 | 0.68496538378041 0.630129911316809 0.364451742747447 0.543913937885835 0.53830256861189 0.714196007538438 0.699107923778453 0.878553113930291 0.99302757740757 0.575010119556777 0.6911978916205 0.636357989285271 0.806443991830283 0.675706991412249 0.772074656742652 | rs12057990 rs12118202 rs13069367 rs148376875 rs2206482 rs2278540 rs3758087 rs3860225 rs4493272 rs4685827 rs7252711 rs7975087 rs912860 rs9586501 rs9958960 |

|    | A                                           | B                                                         | C      | D      | E | F                                                                                                                                                                                                                                                                                                                                                            | G                                                                                                                                                                                                      |
|----|---------------------------------------------|-----------------------------------------------------------|--------|--------|---|--------------------------------------------------------------------------------------------------------------------------------------------------------------------------------------------------------------------------------------------------------------------------------------------------------------------------------------------------------------|--------------------------------------------------------------------------------------------------------------------------------------------------------------------------------------------------------|
| 50 | family.Verrucomicrobiaceae.id.4036          | Forced expiratory volume in 1-second (FEV1), Best measure | AXpdwL | vLGi8p | 0 | 0.415623424491322 0.324150199333205 0.537604799731234 0.262015992881436 0.274429137914702 0.622062853663617 0.49576308516644 0.28546379282559 0.891131635347512 0.686940248667387 0.504224469208406                                                                                                                                                          | rs111862613 rs117107102 rs11729256 rs12908520 rs2602429 rs4242783 rs4936098 rs61779207 rs74542928 rs9349825 rs941682                                                                                   |
| 51 | genus.Roseburia.id.2012                     | Forced expiratory volume in 1-second (FEV1), Best measure | B5jn0Y | vLGi8p | 0 | 0.553254465610942 0.462021057517824 0.392686930531008 0.346210656605965 0.382933909352301 0.411281379014725 0.248979975180546 0.347232207980048 0.738119774169485 0.296484251215462 0.499536356201888 0.360599558017611 0.121265425666737                                                                                                                    | rs147990086 rs16910295 rs2160994 rs2943022 rs302266 rs329182 rs55858165 rs57466170 rs6445851 rs6930661 rs75326254 rs78753150 rs9300744                                                                 |
| 52 | genus.Sutterella.id.2896                    | Forced expiratory volume in 1-second (FEV1), Best measure | BiKMtW | vLGi8p | 0 | 0.856220737076596 0.984404120343372 0.942025065251931 0.875062593832431 0.904716194855545 0.9779560167118 0.907134569591555 0.998650401975613 0.934358803689769 0.594494652097824 0.376733591509419 0.608443003043965                                                                                                                                        | rs1145877 rs11591622 rs13173038 rs143438747 rs2050185 rs2321387 rs2613606 rs607327 rs62501473 rs7499539 rs7638039 rs9350083                                                                            |
| 53 | genus.RuminococcaceaeUCG013.id.11370        | Forced expiratory volume in 1-second (FEV1), Best measure | BLC7wV | vLGi8p | 0 | 0.633112819268106 0.857134420613844 0.994009457382235 0.562757510901008 0.840522682101316 0.880995021363615 0.991404730018144 0.863999989460755 0.897680218604712 0.379642351106592 0.929797607572894 0.798928475720122                                                                                                                                      | rs11581881 rs12189346 rs12336782 rs12485353 rs12781711 rs16918863 rs2730183 rs4385846 rs75088940 rs76973485 rs7784330 rs9313055                                                                        |
| 54 | family.Rikenellaceae.id.967                 | Forced expiratory volume in 1-second (FEV1), Best measure | BLSFBU | vLGi8p | 2 | 0.0805575759248292 0.060944647105046 0.112817931351689 0.0758297978352635 0.131332445487426 0.0680880895260469 0.0252072703382758 0.188075504978324 0.0399638603935588 0.0992381780946262 0.0751613849165142 0.17554231772351 0.119564855463439 0.0804759451851452 0.129117664102198 0.0747160595672602 0.132741730181785 0.152893287591026 0.14242420941248 | rs10217435 rs10832801 rs1939881 rs2447496 rs2833282 rs35909684 rs36021379 rs4264350 rs59663348 rs62532512 rs6744030 rs67705352 rs6837275 rs7242694 rs74474130 rs77885767 rs9389714 rs9578457 rs9603208 |
| 55 | order.Verrucomicrobiales.id.4030            | Forced expiratory volume in 1-second (FEV1), Best measure | BPW89n | vLGi8p | 0 | 0.415497750135951 0.324052574827642 0.53742435453833 0.261987842628763 0.274019139803025 0.622201753750902 0.495604606355016 0.285486276350471 0.890974986312774 0.686547740057213 0.504054258206433                                                                                                                                                         | rs111862613 rs117107102 rs11729256 rs12908520 rs2602429 rs4242783 rs4936098 rs61779207 rs74542928 rs9349825 rs941682                                                                                   |
| 56 | genus.LachnospiraceaeNK4A136group.id.11319  | Forced expiratory volume in 1-second (FEV1), Best measure | Bt0kEx | vLGi8p | 0 | 0.0615352270000084 0.156194316308528 0.0869815733207083 0.0980922767658538 0.137373144017007 0.177618264774876 0.152681746245689 0.111969420876864 0.118912611928386 0.22120073325244 0.341518865985209 0.215962441078102 0.0905417989878216                                                                                                                 | rs11263806 rs12611395 rs160061 rs28540839 rs2880566 rs4955932 rs59805249 rs68104925 rs73044693 rs7616165 rs76193507 rs7832116 rs954878                                                                 |
| 57 | family.Rhodospirillaceae.id.2717            | Forced expiratory volume in 1-second (FEV1), Best measure | Bt1upE | vLGi8p | 0 | 0.604976847652032 0.997334416867423 0.801803313929242 0.862894209165707 0.548160060655284 0.468318221337742 0.816544941973582 0.763379481045722 0.632875470625864 0.494610080220785 0.782850002313345 0.677684844812891 0.484091277487056 0.763428735172357                                                                                                  | rs1035406 rs11591293 rs1549633 rs1923415 rs3754624 rs4278423 rs55876211 rs61933850 rs6679026 rs7001029 rs72714493 rs74354280 rs76784716 rs9813022                                                      |
| 58 | order.Victivallales.id.2254                 | Forced expiratory volume in 1-second (FEV1), Best measure | C1xV1V | vLGi8p | 0 | 0.996685632212326 0.761394619150204 0.924675429599339 0.665837025049607 0.298411836210852 0.690326816178255 0.986929554391556 0.511629230563618                                                                                                                                                                                                              | rs1002941 rs11770843 rs17114848 rs2031282 rs2825714 rs62570196 rs72640280 rs77599476                                                                                                                   |
| 59 | genus.Sellimonas.id.14369                   | Forced expiratory volume in 1-second (FEV1), Best measure | c62fwk | vLGi8p | 0 | 0.748040094971566 0.0670264331911246 0.304779645863055 0.584211968184156 0.278720788848579 0.405766161770019 0.447204247794266 0.47682404368092                                                                                                                                                                                                              | rs113379006 rs2016057 rs2187447 rs2371572 rs41816 rs4600608 rs553697 rs56203279                                                                                                                        |
| 60 | genus.Coproccoccus1.id.11301                | Forced expiratory volume in 1-second (FEV1), Best measure | cqFLTQ | vLGi8p | 0 | 0.246075320626698 0.513185524533047 0.586698149134584 0.291206537813437 0.468748362686404 0.511168604334615 0.392701393654787 0.517357598223495 0.988762613263902 0.493140676028223 0.332769392321736 0.902173674601144                                                                                                                                      | rs1010560 rs12794898 rs1519491 rs1576241 rs1762123 rs2907920 rs4277593 rs56405618 rs73031725 rs73167075 rs74101919 rs946513                                                                            |
| 61 | family.ClostridialesvadinBB60group.id.11286 | Forced expiratory volume in 1-second (FEV1), Best measure | CUTsMo | vLGi8p | 0 | 0.0915368451978634 0.0607111777106605 0.061454226397744 0.0893722126114047 0.144724894047394 0.229764231762575 0.17914435963334 0.128845462030185 0.126709477637772 0.191655588516268 0.166415272479298 0.271216854111799 0.110034062950142 0.351731277068378                                                                                                | rs10517600 rs10904722 rs13409132 rs17121075 rs2191834 rs28691777 rs34088226 rs55682560 rs6588624 rs66714985 rs7226487 rs7538034 rs7725895 rs989682                                                     |
| 62 | order.Actinomycetales.id.420                | Forced expiratory volume in 1-second (FEV1), Best measure | CYNr8c | vLGi8p | 0 | 0.441743040834883 0.597649176162509 0.229410155655925 0.784796977738487 0.279493721663951                                                                                                                                                                                                                                                                    | rs2889192 rs34583783 rs35011108 rs4073240 rs58484246                                                                                                                                                   |
| 63 | family.Lactobacillaceae.id.1836             | Forced expiratory volume in 1-second (FEV1), Best measure | d9u3Wa | vLGi8p | 0 | 0.82903985438144 0.771511514978967 0.81298605718838 0.617585730381912 0.287584190898758 0.428924497744427 0.628052349269655 0.194678600689143                                                                                                                                                                                                                | rs11674854 rs16861661 rs62314653 rs74599091 rs768253 rs77478751 rs921925 rs9345899                                                                                                                     |
| 64 | class.Alphaproteobacteria.id.2379           | Forced expiratory volume in 1-second (FEV1), Best measure | dP6VTT | vLGi8p | 0 | 0.364419186982994 0.571267368788786 0.209032688181549 0.548636353717847 0.800243511116077 0.382861132230397 0.261460240962279                                                                                                                                                                                                                                | rs140912403 rs34569731 rs55876211 rs62285697 rs76784716 rs7960664 rs9813022                                                                                                                            |
| 65 | order.Enterobacteriales.id.3468             | Forced expiratory volume in 1-second (FEV1), Best measure | dSCeM7 | vLGi8p | 0 | 0.783724921612904 0.650263887646761 0.54101901191386 0.909708689554084 0.688998411164247 0.390507619283912 0.759965295324371                                                                                                                                                                                                                                 | rs11026530 rs2374342 rs35673018 rs504442 rs62210023 rs78143293 rs79757635                                                                                                                              |

|    | A                                           | B                                                         | C      | D      | E  | F                                                                                                                                                                                                                                                           | G                                                                                                                                     |
|----|---------------------------------------------|-----------------------------------------------------------|--------|--------|----|-------------------------------------------------------------------------------------------------------------------------------------------------------------------------------------------------------------------------------------------------------------|---------------------------------------------------------------------------------------------------------------------------------------|
| 66 | family.BacteroidalesS24.7group.id.11173     | Forced expiratory volume in 1-second (FEV1), Best measure | DwGyne | vLGi8p | 5  | 0.00311820185590501 0.0557783287875655 0.0295559297215456 0.0225477627055253 0.0693482281682302 0.0720185991515338 0.0497158660067898 0.0113312694927793                                                                                                    | rs10872669 rs12748533 rs17043785 rs61508842 rs689695 rs738193 rs78609301 rs941000                                                     |
| 67 | genus.Oxalobacter.id.2978                   | Forced expiratory volume in 1-second (FEV1), Best measure | E1ZDX3 | vLGi8p | 0  | 0.911968835129383 0.987121412736796 0.893279267331323 0.838404038190667 0.959769537717571 0.861643994365263 0.815013236543463 0.268375180345256 0.658314312965919 0.945149387368664 0.86964150690827                                                        | rs10464997 rs11108500 rs111966731 rs12002250 rs1569853 rs36057338 rs3862635 rs4428215 rs6000536 rs6993398 rs736744                    |
| 68 | genus.Dorea.id.1997                         | Forced expiratory volume in 1-second (FEV1), Best measure | e5mJnF | vLGi8p | 0  | 0.268009504214151 0.739118936178155 0.750638028010207 0.823664391924854 0.277193813428499 0.441713394279221 0.395447375785102 0.512423673552109 0.618958666640237 0.443478734807717                                                                         | rs11150408 rs12537781 rs13279148 rs1899291 rs3005511 rs345219 rs3752849 rs4793307 rs62503162 rs73729431                               |
| 69 | genus.Ruminococcus1.id.11373                | Forced expiratory volume in 1-second (FEV1), Best measure | ebP4zV | vLGi8p | 0  | 0.436202420986533 0.349515507479938 0.170348482000606 0.21796606778617 0.0661376831679786 0.25792668560788 0.0958190305639986 0.215393611631547 0.332124182799879 0.313200029438374                                                                         | rs10167839 rs11783695 rs17781867 rs3819978 rs6105066 rs6493760 rs7117576 rs7583465 rs78572139 rs78613526                              |
| 70 | family.Clostridiaceae1.id.1869              | Forced expiratory volume in 1-second (FEV1), Best measure | FcqSNY | vLGi8p | 0  | 0.941494940790495 0.844314940677735 0.428792247790173 0.659092904083752 0.972259197661016 0.511880021829283 0.600563269459758 0.5178977156154 0.785800913980738 0.746093163849573                                                                           | rs10875374 rs12186080 rs12341505 rs2795528 rs2817172 rs4723021 rs550843 rs56188186 rs62397761 rs881532                                |
| 71 | phylum.Verrucomicrobia.id.3982              | Forced expiratory volume in 1-second (FEV1), Best measure | fE3r8h | vLGi8p | 0  | 0.50254025856235 0.258357850968632 0.433205716109307 0.541347500421417 0.217056396554986 0.217013072487972 0.32259129836081 0.504227449461272 0.23056741338282 0.732076014340252 0.257598361548552 0.544199124888861                                        | rs11252894 rs117107102 rs11729256 rs12512971 rs12908520 rs2602429 rs3995795 rs45598138 rs61779207 rs74542928 rs76430504 rs9349825     |
| 72 | family.Actinomycetaceae.id.421              | Forced expiratory volume in 1-second (FEV1), Best measure | FFi1Rd | vLGi8p | 0  | 0.443593536068738 0.599652088539916 0.230793813842426 0.785194844028897 0.280417687937905                                                                                                                                                                   | rs2889192 rs34583783 rs35011108 rs4073240 rs58484246                                                                                  |
| 73 | order.Erysipelotrichales.id.2148            | Forced expiratory volume in 1-second (FEV1), Best measure | FIVBaS | vLGi8p | 13 | 0.0133273620217314 0.0162911566357644 0.00214429917157366 0.00788337406520918 0.0385409710904978 0.00845566276565483 0.0148251663895242 0.001195739127494 0.0119844107836469 0.00618528041833126 0.00515159329548944 0.00958178461299759 0.0102752377970715 | rs1074800 rs10781552 rs17530232 rs1884466 rs2300774 rs290833 rs35161940 rs4078432 rs56970041 rs62504403 rs7234058 rs7826267 rs8003149 |
| 74 | class.Clostridia.id.1859                    | Forced expiratory volume in 1-second (FEV1), Best measure | Fr2Ff4 | vLGi8p | 12 | 0.00022132624186177 0.000215444261668829 0.00231636045577715 0.0027825122768486 0.000375124821768002 0.00181314234571318 0.00213772655598561 0.00264120405243674 0.00164064309254871 0.00122662055701914 9.88358897576977e-05 0.00179853651639821           | rs10774377 rs112334273 rs13105690 rs13179700 rs1842454 rs2273429 rs6797343 rs6814436 rs6815608 rs72738886 rs72915163 rs76767978       |
| 75 | class.Gammaproteobacteria.id.3303           | Forced expiratory volume in 1-second (FEV1), Best measure | FRQYhm | vLGi8p | 0  | 0.197719999079496 0.294469298283569 0.225069078210986 0.626750167334922 0.608580937640556 0.61534772796271 0.236986780716049                                                                                                                                | rs11181912 rs12404135 rs2234691 rs6706173 rs75101789 rs79795896 rs9494710                                                             |
| 76 | genus.Actinomyces.id.423                    | Forced expiratory volume in 1-second (FEV1), Best measure | FT7OrH | vLGi8p | 0  | 0.558442548373706 0.369851553832849 0.186273120044159 0.429415093570662 0.330746287660762 0.0694567484738764 0.292969256821947                                                                                                                              | rs2715439 rs34583783 rs35011108 rs4073240 rs4146653 rs71315246 rs7915461                                                              |
| 77 | family.FamilyXI.id.1936                     | Forced expiratory volume in 1-second (FEV1), Best measure | FXBXNG | vLGi8p | 0  | 0.716150874126366 0.529356870450776 0.267160706060752 0.437962332213374 0.370418741978102 0.115264303346018 0.489983833666249 0.596184401096                                                                                                                | rs10759623 rs11547158 rs17379710 rs2155352 rs2156611 rs3733511 rs488164 rs697771                                                      |
| 78 | phylum.Lentisphaerae.id.2238                | Forced expiratory volume in 1-second (FEV1), Best measure | gkAVOW | vLGi8p | 0  | 0.869418425205644 0.636954388463216 0.793339102384574 0.548708108988574 0.200814702152625 0.784151211022404 0.840976226667739 0.879394521074442 0.398107856651422                                                                                           | rs1002941 rs11770843 rs17114848 rs2031282 rs2825714 rs60995569 rs62570196 rs72640280 rs77599476                                       |
| 79 | genus..Ruminococcusgavreauuiigroup.id.11342 | Forced expiratory volume in 1-second (FEV1), Best measure | GNp2YQ | vLGi8p | 0  | 0.296160667893388 0.26453196953208 0.310197646575339 0.349399499622557 0.395208175444177 0.0878419716807926 0.474091103812192 0.0610150176455981 0.285632183509742 0.359452723596565 0.171642712540358 0.21519562545245                                     | rs10931481 rs12079579 rs12539819 rs1391597 rs2047242 rs2105937 rs2166943 rs289410 rs431418 rs71386687 rs73802842 rs9870933            |
| 80 | genus.RikenellaceaeRC9gutgroup.id.11191     | Forced expiratory volume in 1-second (FEV1), Best measure | hUph1f | vLGi8p | 0  | 0.796451258549059 0.911006450919647 0.945188610066928 0.441013810633361 0.957464104278781 0.676215466100799 0.810235156546472 0.636099746308018 0.985641366632804 0.922224055726363 0.812186451011932                                                       | rs12501673 rs17032291 rs17582787 rs2074881 rs2900503 rs2998141 rs4270579 rs4717843 rs7712231 rs80309088 rs9887954                     |
| 81 | genus.Tyzzerella3.id.11335                  | Forced expiratory volume in 1-second (FEV1), Best measure | I2CEyx | vLGi8p | 0  | 0.888881836244601 0.86872319267965 0.931173788362277 0.876408292913384 0.77854776780574 0.983187242044875 0.499319154640371 0.864489565667619 0.65013228344339 0.519954749704506 0.897911690631658 0.818649633136273                                        | rs10898797 rs1232220 rs17706273 rs191093 rs4904512 rs55799124 rs67476743 rs6920448 rs7019909 rs7333521 rs75091807 rs7561370           |

|    | A                                     | B                                                         | C      | D      | E | F                                                                                                                                                                                                                                                                                                                           | G                                                                                                                                                                                   |
|----|---------------------------------------|-----------------------------------------------------------|--------|--------|---|-----------------------------------------------------------------------------------------------------------------------------------------------------------------------------------------------------------------------------------------------------------------------------------------------------------------------------|-------------------------------------------------------------------------------------------------------------------------------------------------------------------------------------|
| 82 | genus.Prevotella9.id.11183            | Forced expiratory volume in 1-second (FEV1), Best measure | i5XXsr | vLGi8p | 0 | 0.823080971511406 0.890638562217256 0.976328516184165 0.887512207476251 0.888487055205122 0.886054059704151 0.886856879718832 0.923340484264444 0.537046978463493 0.638838815075787 0.553650063850476 0.7208651889043 0.728645064928849 0.847412740601686                                                                   | rs111509883 rs11685699 rs117271932 rs12648235 rs1304512 rs2104588 rs2495052 rs2683313 rs4968431 rs7237249 rs746764 rs7976209 rs9428102 rs9613013                                    |
| 83 | genus.Erysipelatoclostridium.id.11381 | Forced expiratory volume in 1-second (FEV1), Best measure | iAhkfc | vLGi8p | 0 | 0.183035840012761 0.186866600842742 0.0910532974477531 0.131322777106682 0.158881212981742 0.16284676902719 0.0737710022568748 0.350625199501033 0.162144992359849 0.113691770521029 0.106525730182686 0.125871714512258 0.147653759198594 0.0846890991093321 0.193544241676985                                             | rs1434153 rs16936671 rs17804233 rs2901723 rs340991 rs3804326 rs45480394 rs4697572 rs58236560 rs61806970 rs622418 rs6474512 rs710230 rs7221249 rs9590927                             |
| 84 | class.Bacilli.id.1673                 | Forced expiratory volume in 1-second (FEV1), Best measure | lgBtIU | vLGi8p | 4 | 0.0812098141363423 0.101105693581094 0.0642406132194357 0.103057337857981 0.0866781870487398 0.0907410204967258 0.128272869921922 0.024048920812371 0.185081730515818 0.112044689077183 0.0771484692572896 0.0989473785023332 0.0486983219889699 0.0442350936265259 0.133017960216733 0.0661047189140288 0.0217744286811498 | rs11110282 rs11730038 rs12797734 rs13068444 rs1595463 rs28564647 rs34989881 rs35344081 rs4028634 rs4459992 rs57872228 rs694949 rs74663707 rs7666190 rs77558518 rs78938557 rs9581006 |
| 85 | phylum.Actinobacteria.id.400          | Forced expiratory volume in 1-second (FEV1), Best measure | lloqrp | vLGi8p | 0 | 0.504922249758779 0.928741357959897 0.825974165322085 0.91056023779649 0.996285414975861 0.850024854822917 0.765146545502835 0.665923380285181 0.858828914561119 0.860778671213833 0.639255665123715 0.838258361287261 0.934202526959554 0.945568138527092                                                                  | rs11766971 rs12528285 rs13192624 rs1397793 rs4429415 rs55888705 rs6496870 rs6743026 rs74037001 rs75211493 rs80124826 rs8047955 rs857444 rs9833771                                   |
| 86 | genus.Ruminiclostridium5.id.11355     | Forced expiratory volume in 1-second (FEV1), Best measure | iMGTCd | vLGi8p | 1 | 0.118696119158999 0.192197618912101 0.324098507594422 0.0555003762363048 0.11115481301537 0.218069026375227 0.128704236642957 0.206080411492845 0.25413245343915 0.04321828705419                                                                                                                                           | rs10827477 rs113753996 rs1223978 rs1492620 rs2791343 rs2833828 rs4955951 rs6121460 rs79968837 rs8053158                                                                             |
| 87 | genus.Ruminiclostridium6.id.11356     | Forced expiratory volume in 1-second (FEV1), Best measure | iwpbIH | vLGi8p | 0 | 0.446852233239195 0.674747818476044 0.499418252151463 0.628369623036724 0.382206247310081 0.0702001734247644 0.443309987079926 0.435220216894689 0.602871219794688 0.316500224524476 0.361554314669709 0.444031928091695 0.327172264152457 0.32345648629403 0.420711682330959                                               | rs10829821 rs116969552 rs11992182 rs2548459 rs35362464 rs61060922 rs663262 rs67479537 rs71414120 rs72991535 rs73176030 rs77193512 rs792058 rs79968172 rs9555756                     |
| 88 | order.NB1n.id.3953                    | Forced expiratory volume in 1-second (FEV1), Best measure | j0mByI | vLGi8p | 0 | 0.99303751701678 0.914356380361899 0.96294711470677 0.997313133087844 0.891892518797659 0.842842580013716 0.998477847364626 0.436747968095732 0.426350748445142 0.969886541881236 0.794456423338821 0.843423973634595 0.960036609684717                                                                                     | rs11251024 rs11606187 rs13385922 rs166849 rs2172426 rs267959 rs4383094 rs60583455 rs60775321 rs72671304 rs7911787 rs8126061 rs9542068                                               |
| 89 | genus.CandidatusSoleaferrea.id.11350  | Forced expiratory volume in 1-second (FEV1), Best measure | j4g0ZV | vLGi8p | 0 | 0.95861725738428 0.970853004260315 0.83796271358206 0.839572153783669 0.848250628443877 0.618390667007894 0.66137297587654 0.384043011710833 0.980539616148941                                                                                                                                                              | rs10090365 rs10108780 rs10809135 rs4294381 rs4678258 rs6489992 rs6494306 rs7400877 rs9973954                                                                                        |
| 90 | genus.Eisenbergiella.id.11304         | Forced expiratory volume in 1-second (FEV1), Best measure | j87dXS | vLGi8p | 0 | 0.601827685656629 0.66952625063306 0.589247791489095 0.495939499478247 0.163198181805779 0.194648567929991 0.465239929702872 0.636580330427496 0.3259149041754 0.724897622171228 0.600949175661677                                                                                                                          | rs11027642 rs11079158 rs11938607 rs12257723 rs12710729 rs13258851 rs1508033 rs1553971 rs2683098 rs3812426 rs4462860                                                                 |
| 91 | order.Lactobacillales.id.1800         | Forced expiratory volume in 1-second (FEV1), Best measure | jfZByg | vLGi8p | 2 | 0.149385146004834 0.219786463835155 0.179085745020344 0.122240699191818 0.158154261509701 0.13700934265641 0.219050827329575 0.0310760628733432 0.264904814184219 0.143091032554117 0.0944515992086614 0.21838209878208 0.125810953255168 0.0325842266291089                                                                | rs11110282 rs11627423 rs11730038 rs12797734 rs1595463 rs2370083 rs34989881 rs35344081 rs4028634 rs57872228 rs74663707 rs77558518 rs78938557 rs9581006                               |
| 92 | genus.Adlercreutzia.id.812            | Forced expiratory volume in 1-second (FEV1), Best measure | JHChB7 | vLGi8p | 0 | 0.720516170551885 0.536742933243808 0.659605865403776 0.491745008891455 0.509858733592223 0.727595993735397 0.176363263809997 0.520846818364208                                                                                                                                                                             | rs11604400 rs13231526 rs2717140 rs55719207 rs6664405 rs7680684 rs9490822 rs9915817                                                                                                  |
| 93 | order.Pasteurellales.id.3688          | Forced expiratory volume in 1-second (FEV1), Best measure | jHia6Z | vLGi8p | 1 | 0.213549089609166 0.123264520991439 0.308166022253241 0.234345556890661 0.302662328146299 0.045851174057191 0.231284637398304 0.280016281924078 0.363417004063923 0.355579776270807 0.171536483331805 0.100891977138756 0.163413068979276 0.186850888154024                                                                 | rs10965428 rs111582866 rs12050685 rs16970009 rs35510 rs4822728 rs6972479 rs72756943 rs73139353 rs76022354 rs78909003 rs9382510 rs9895850 rs9938097                                  |
| 94 | genus.Enterorhabdus.id.820            | Forced expiratory volume in 1-second (FEV1), Best measure | jJC3Fm | vLGi8p | 0 | 0.333640923988724 0.659927886249468 0.936766389940791 0.32162001928663 0.732371285955977 0.553617994882484                                                                                                                                                                                                                  | rs10098492 rs114731706 rs2051957 rs3017103 rs73331712 rs77655283                                                                                                                    |
| 95 | genus.Butyricimonas.id.945            | Forced expiratory volume in 1-second (FEV1), Best measure | jUcEpg | vLGi8p | 0 | 0.234478562540996 0.448656182690184 0.176571483500251 0.342814749423851 0.277375458050192 0.633970089153134 0.621065452222641 0.333614277524569 0.341615625368927 0.359344446588597 0.279118977533493 0.600062690914951                                                                                                     | rs11228830 rs113054641 rs12304031 rs1862649 rs2114713 rs62130338 rs62390301 rs7083431 rs71428626 rs72814525 rs78453362 rs9657374                                                    |
| 96 | genus.RuminococcaceaeUCG010.id.11367  | Forced expiratory volume in 1-second (FEV1), Best measure | kjA5PB | vLGi8p | 0 | 0.176051562791325 0.204243137265287 0.0828560849910386 0.346359486621189 0.217905442814591 0.124044710264929                                                                                                                                                                                                                | rs12597105 rs2820282 rs682403 rs6958419 rs73218807 rs7441445                                                                                                                        |
| 97 | family.Defluviitaleaceae.id.1924      | Forced expiratory volume in 1-second (FEV1), Best measure | kodRd1 | vLGi8p | 0 | 0.64631924600115 0.922515492235628 0.606247648082784 0.851152421163956 0.504139120782403 0.545301504037777 0.563310482889796 0.834506710638206 0.259965558621715 0.639636693268687 0.869734495690033                                                                                                                        | rs112893842 rs1582238 rs17051335 rs1908593 rs4344384 rs4677103 rs540220 rs55658617 rs72731813 rs9608282 rs9725395                                                                   |

|     | A                                             | B                                                         | C      | D      | E  | F                                                                                                                                                                                                                                                                                                                         | G                                                                                                                                                                                    |
|-----|-----------------------------------------------|-----------------------------------------------------------|--------|--------|----|---------------------------------------------------------------------------------------------------------------------------------------------------------------------------------------------------------------------------------------------------------------------------------------------------------------------------|--------------------------------------------------------------------------------------------------------------------------------------------------------------------------------------|
| 98  | genus.Prevotella7.id.11182                    | Forced expiratory volume in 1-second (FEV1), Best measure | LCZ8yH | vLGi8p | 0  | 0.856380019352551 0.992785024270507 0.781166284557217 0.387050335556577 0.827295017570923 0.925052649504183 0.773896663145611 0.997454857338774 0.917411268720369 0.635930677349685 0.677687479570579                                                                                                                     | rs118038478 rs12124567 rs12195431 rs2240542 rs2918132 rs430270 rs57404562 rs79263163 rs9426434 rs9608249 rs9959718                                                                   |
| 99  | genus.RuminococcaceaeUCG003.id.11361          | Forced expiratory volume in 1-second (FEV1), Best measure | lJcL8y | vLGi8p | 0  | 0.693162398824355 0.909098044167736 0.824037176886335 0.737716574954015 0.774309728279246 0.759360628861143 0.697389411548293 0.396106077790955 0.403929043855453 0.557112034116769 0.877110483845094 0.617781918121778                                                                                                   | rs10490280 rs11243416 rs11613919 rs16959793 rs2523124 rs3013089 rs4452755 rs4532474 rs646327 rs6759615 rs73341549 rs78720113                                                         |
| 100 | genus.Terrisporobacter.id.11348               | Forced expiratory volume in 1-second (FEV1), Best measure | LKYg6S | vLGi8p | 0  | 0.342550483075113 0.271948862134475 0.0829012480178591 0.0533919403097847 0.25264742341172                                                                                                                                                                                                                                | rs1883097 rs2569953 rs2872237 rs58405430 rs7184125                                                                                                                                   |
| 101 | family.Bifidobacteriaceae.id.433              | Forced expiratory volume in 1-second (FEV1), Best measure | LRKdla | vLGi8p | 0  | 0.122216198738855 0.162325009531256 0.24226679227237 0.617509370161881 0.244443467139934 0.288936848123402 0.147387504949386 0.341237454631036 0.28350309875288 0.129588312356762                                                                                                                                         | rs10831953 rs12446429 rs13020688 rs4957061 rs540489 rs55888705 rs6899771 rs7174549 rs73797465 rs857444                                                                               |
| 102 | order.Desulfovibrionales.id.3156              | Forced expiratory volume in 1-second (FEV1), Best measure | m0ByAU | vLGi8p | 12 | 0.0340418822336708 0.0031679522996917 0.0063439132646553 0.00146005555812246 0.00278166532963584 0.00187827174287154 0.00268992090643255 0.00146852873869793 0.0125925714650608 0.00604236610982548 0.0038986718285467 0.0115517642217171                                                                                 | rs112381107 rs11599763 rs17791387 rs186073 rs2692012 rs2838334 rs3935584 rs4506934 rs6058181 rs62020470 rs72647048 rs9928243                                                         |
| 103 | family.Enterobacteriaceae.id.3469             | Forced expiratory volume in 1-second (FEV1), Best measure | m9LXEq | vLGi8p | 0  | 0.783724921612904 0.650263887646761 0.54101901191386 0.909708689554084 0.688998411164247 0.390507619283912 0.759965295324371                                                                                                                                                                                              | rs11026530 rs2374342 rs35673018 rs504442 rs62210023 rs78143293 rs79757635                                                                                                            |
| 104 | family.Coriobacteriaceae.id.811               | Forced expiratory volume in 1-second (FEV1), Best measure | MBOR7Y | vLGi8p | 0  | 0.841377450184237 0.889811343614703 0.826262004919276 0.917290842790644 0.681259028613068 0.934728812255216 0.652251441116861 0.61963250312383 0.742123019956399 0.951266326721758 0.458263506829112 0.609491422306478 0.87174456222514 0.888238357357145                                                                 | rs11073596 rs11250875 rs11656361 rs12974142 rs13307134 rs1397793 rs1816223 rs240104 rs2442778 rs3025411 rs34739816 rs67561917 rs719099 rs8010111                                     |
| 105 | genus.Lachnodostridium.id.11308               | Forced expiratory volume in 1-second (FEV1), Best measure | MpL626 | vLGi8p | 0  | 0.838544702887244 0.908375398436843 0.66945465627649 0.580334266223608 0.683351783657649 0.697215354574704 0.691592654452433 0.380100848614301 0.749934266367937 0.522502815673267 0.178488887399994 0.597899644297373 0.673004329138158                                                                                  | rs1031599 rs12566975 rs1528479 rs1997204 rs2385421 rs3821998 rs4738679 rs6112314 rs615997 rs62285313 rs72829893 rs78068103 rs789029                                                  |
| 106 | class.Melainabacteria.id.1589                 | Forced expiratory volume in 1-second (FEV1), Best measure | Msb4zz | vLGi8p | 0  | 0.567791648320736 0.499001624466439 0.282503116039672 0.372224566849764 0.275791331126004 0.426092905924759 0.144202846937457 0.472291481266412 0.90028636739459 0.253758897568868                                                                                                                                        | rs10148250 rs10738747 rs11150282 rs113884518 rs28678345 rs367480 rs4129395 rs789069 rs79790072 rs9864379                                                                             |
| 107 | class.Negativicutes.id.2164                   | Forced expiratory volume in 1-second (FEV1), Best measure | MXS84H | vLGi8p | 1  | 0.330509987801178 0.31111779080406 0.126686008155614 0.169064233657826 0.163331449458697 0.183036801703148 0.161150087419419 0.139965663654808 0.294744674257107 0.0325169900113907 0.197153347464235                                                                                                                     | rs13086907 rs1643968 rs1649999 rs2834062 rs4463806 rs4722181 rs60274479 rs61249479 rs71405394 rs73232831 rs9423647                                                                   |
| 108 | genus.Barnesiella.id.944                      | Forced expiratory volume in 1-second (FEV1), Best measure | mz9jd0 | vLGi8p | 0  | 0.413540599597159 0.37338341877226 0.41781693879625 0.103491840588699 0.497364370498527 0.736243467062837 0.842669319317167 0.514960818241099 0.336212008484977 0.278522174197883 0.313121534318017 0.427189916967691 0.55723715202193 0.467345793657766                                                                  | rs11155559 rs113258194 rs12909713 rs13242616 rs199035 rs2276875 rs2428166 rs35177866 rs60316894 rs62251337 rs72684847 rs76181748 rs77455852 rs79795328                               |
| 109 | class.Deltaproteobacteria.id.3087             | Forced expiratory volume in 1-second (FEV1), Best measure | n3j0op | vLGi8p | 13 | 0.00224450970889626 0.00461224535474301 0.00033831220736563 0.00021078745210223 0.000743780117676629 0.000290724258642782 0.00018738262805147 0.000279302076091444 0.000141415289918638 0.000418903644999628 0.00163901847770943 0.000714151036925186 0.00148804111597679                                                 | rs1035691 rs112381107 rs11599763 rs17084793 rs17791387 rs2692012 rs2838334 rs3935584 rs4506934 rs55744759 rs6058181 rs62020470 rs9928243                                             |
| 110 | family.Lachnospiraceae.id.1987                | Forced expiratory volume in 1-second (FEV1), Best measure | nFIAu5 | vLGi8p | 5  | 0.0994837829499731 0.042203957797167 0.0447025680077033 0.105295516509709 0.0728983266140354 0.025535625764173 0.091379730799461 0.124254532524985 0.0228437548153198 0.0883273155099295 0.164608530126549 0.123253512689947 0.0865687053679585 0.0567015818633617 0.100291217912615 0.0456700331564456 0.074502440514128 | rs10402491 rs11139361 rs112040820 rs11841382 rs11979110 rs1205443 rs12760724 rs13005175 rs146660815 rs2159863 rs2910921 rs3127230 rs35524804 rs7359994 rs79086868 rs959845 rs9929145 |
| 111 | genus.Peptococcus.id.2037                     | Forced expiratory volume in 1-second (FEV1), Best measure | nlesEv | vLGi8p | 0  | 0.352186718670548 0.47434170485807 0.240220003235469 0.805836123240127 0.487919165700897 0.199138054046142 0.242732009065604 0.609533527093357 0.403875578820359 0.52984881834954 0.420722933236453 0.404975499896836                                                                                                     | rs10031059 rs11001941 rs12069354 rs2054133 rs36121075 rs413827 rs5770862 rs6918730 rs7033353 rs72850165 rs74592222 rs77681628                                                        |
| 112 | order.Methanobacteriales.id.120               | Forced expiratory volume in 1-second (FEV1), Best measure | NKNDGp | vLGi8p | 0  | 0.427492095982764 0.645029116635225 0.295436006894644 0.251854361318758 0.787733286158593 0.747562854145554 0.530630056795212 0.185039633419839                                                                                                                                                                           | rs10424197 rs4257531 rs56131665 rs6508769 rs6776814 rs73068003 rs73457410 rs894996                                                                                                   |
| 113 | genus..Eubacteriumoxidoreducensgroup.id.11339 | Forced expiratory volume in 1-second (FEV1), Best measure | nnD7ru | vLGi8p | 0  | 0.884007296602318 0.737063970848617 0.959861751401718 0.383621408961117 0.810537740120009                                                                                                                                                                                                                                 | rs12129908 rs12423772 rs2973294 rs34561138 rs440215                                                                                                                                  |

|     | A                                       | B                                                         | C      | D      | E  | F                                                                                                                                                                                                                                                                                                                                                                      | G                                                                                                                                                                                                                   |
|-----|-----------------------------------------|-----------------------------------------------------------|--------|--------|----|------------------------------------------------------------------------------------------------------------------------------------------------------------------------------------------------------------------------------------------------------------------------------------------------------------------------------------------------------------------------|---------------------------------------------------------------------------------------------------------------------------------------------------------------------------------------------------------------------|
| 114 | genus.FamilyXIIID3011group.id.11293     | Forced expiratory volume in 1-second (FEV1), Best measure | NqdTjG | vLGi8p | 0  | 0.687138683596112 0.325272964368589 0.730623727270354 0.968836729719893 0.942644516081102 0.758258386201234 0.5021227104848 0.881799369013123 0.552095331799617 0.487156346123004 0.780221583179242                                                                                                                                                                    | rs11126423 rs11736617 rs12812672 rs149302 rs16840310 rs16940167 rs17156849 rs62029761 rs62200412 rs72730932 rs9837139                                                                                               |
| 115 | class.Lentisphaeria.id.2250             | Forced expiratory volume in 1-second (FEV1), Best measure | nQHoYD | vLGi8p | 0  | 0.996685632212326 0.761394619150204 0.924675429599339 0.665837025049607 0.298411836210852 0.690326816178255 0.986929554391556 0.511629230563618                                                                                                                                                                                                                        | rs1002941 rs11770843 rs17114848 rs2031282 rs2825714 rs62570196 rs72640280 rs77599476                                                                                                                                |
| 116 | class.Mollicutes.id.3920                | Forced expiratory volume in 1-second (FEV1), Best measure | nRNBx9 | vLGi8p | 0  | 0.83095760000897 0.159870490858447 0.720860661026086 0.304238799358615 0.501752366327439 0.784331119670056 0.596425498481921 0.488522673683372 0.552311350750024 0.752053509281804 0.848756998293896 0.520379841656326                                                                                                                                                 | rs10108398 rs11890098 rs12566890 rs17214486 rs2464826 rs28537087 rs3768491 rs4885016 rs6043847 rs72901605 rs74603314 rs78169027                                                                                     |
| 117 | family.Bacteroidaceae.id.917            | Forced expiratory volume in 1-second (FEV1), Best measure | O0n2Pz | vLGi8p | 0  | 0.811684645427803 0.685998388809887 0.64129978753969 0.479937920915135 0.280390617961585 0.555906992826525 0.748845315401521 0.24351540922057 0.655784345028267                                                                                                                                                                                                        | rs11585893 rs13207588 rs1340391 rs17619981 rs2023437 rs66474973 rs66710942 rs6795673 rs9507307                                                                                                                      |
| 118 | family.Veillonellaceae.id.2172          | Forced expiratory volume in 1-second (FEV1), Best measure | obtxsV | vLGi8p | 0  | 0.924718432168969 0.956550406751107 0.838466247995303 0.695145949416266 0.984321034454719 0.449305232215785 0.983449141335509 0.805408877129 0.83832257896257 0.935211838580409 0.850598126856135 0.964101628600604 0.882480238602379 0.719540310874143 0.809577725144887 0.951083301713622 0.807716203644564 0.890066494050548 0.917871739502291                      | rs111810795 rs114889439 rs11700976 rs12186441 rs12668619 rs12741784 rs1442060 rs1693340 rs2175069 rs2561116 rs2585520 rs4263802 rs4461038 rs4797169 rs61264131 rs6692542 rs6909981 rs79535861 rs9345168             |
| 119 | phylum.Bacteroidetes.id.905             | Forced expiratory volume in 1-second (FEV1), Best measure | oChqj7 | vLGi8p | 0  | 0.375348894711796 0.469118269989901 0.113647521609329 0.319222212551411 0.265646993808958 0.70703585322558 0.524464679649834 0.211942307025017 0.430231525138154                                                                                                                                                                                                       | rs111845179 rs2032750 rs62531359 rs6586324 rs73512608 rs73846128 rs73975615 rs7999780 rs929878                                                                                                                      |
| 120 | order.Coriobacteriales.id.810           | Forced expiratory volume in 1-second (FEV1), Best measure | oGD8An | vLGi8p | 0  | 0.841377450184237 0.889811343614703 0.826262004919276 0.917290842790644 0.681259028613068 0.934728812255216 0.652251441116861 0.61963250312383 0.742123019956399 0.951266326721758 0.458263506829112 0.609491422306478 0.87174456222514 0.888238357357145                                                                                                              | rs11073596 rs11250875 rs11656361 rs12974142 rs13307134 rs1397793 rs1816223 rs240104 rs2442778 rs3025411 rs34739816 rs67561917 rs719099 rs8010111                                                                    |
| 121 | genus.RuminococcaceaeUCG002.id.11360    | Forced expiratory volume in 1-second (FEV1), Best measure | OhSZ6N | vLGi8p | 0  | 0.825570301956259 0.801536644557505 0.591417182116029 0.764240165314896 0.720779504577957 0.714878730910355 0.549236720210831 0.630780374814696 0.869256939641333 0.716321111602523 0.65577746279813 0.392142243849525 0.804033092479238 0.969298154719036 0.967869798335639 0.615067909996982 0.666572448821596 0.617583641485581 0.702473211042833 0.647770962213808 | rs10916131 rs10927423 rs10964441 rs113147300 rs11607472 rs116974815 rs12463378 rs15256 rs55793120 rs56030423 rs57079348 rs6542556 rs6793778 rs7120052 rs7155595 rs7342369 rs76847269 rs77564310 rs79016051 rs882348 |
| 122 | genus..Eubacteriumnodatumgroup.id.11297 | Forced expiratory volume in 1-second (FEV1), Best measure | oIDISu | vLGi8p | 1  | 0.398484350086821 0.498366162402528 0.233805057428288 0.354866430647359 0.404574031189858 0.201904738588467 0.401116657631191 0.262839744618728 0.283493608443377 0.37286557379421 0.0250613712478886                                                                                                                                                                  | rs10263623 rs10458299 rs11006576 rs113893692 rs34297067 rs61841040 rs6818880 rs77910827 rs7827125 rs7880204 rs9425984                                                                                               |
| 123 | genus.Alloprevotella.id.961             | Forced expiratory volume in 1-second (FEV1), Best measure | OtCSo3 | vLGi8p | 0  | 0.85936371212152 0.454123240330927 0.873677614871081 0.614407118272846 0.485463167731373 0.563143868176429                                                                                                                                                                                                                                                             | rs12675596 rs2154444 rs34619204 rs4364940 rs4680035 rs58212166                                                                                                                                                      |
| 124 | family.Peptostreptococcaceae.id.2042    | Forced expiratory volume in 1-second (FEV1), Best measure | oU56W6 | vLGi8p | 0  | 0.746171151118681 0.475936210959786 0.735911091079469 0.27285601541596 0.76453280596129 0.979544947371702 0.960997296766807 0.819327327205202 0.75870211494288 0.786163323570966 0.952630210507246 0.890833423086252 0.68590430882292                                                                                                                                  | rs117020988 rs12377846 rs12986312 rs1467258 rs1520207 rs4692811 rs59865771 rs59987323 rs61841503 rs6721459 rs76982728 rs77540684 rs9573937                                                                          |
| 125 | order.Clostridiales.id.1863             | Forced expiratory volume in 1-second (FEV1), Best measure | Oxkiqb | vLGi8p | 13 | 0.000690387223330162 0.000693220060222326 0.00450366500077289 0.00933687718177421 0.00103412217054525 0.00373530820681966 0.000696970497213802 0.00342295872440826 0.0084837441395808 0.00344281126264682 0.00277526542161534 0.00041868788086311 0.00366577919679065                                                                                                  | rs10774377 rs112334273 rs13105690 rs13179700 rs1842454 rs2273429 rs290772 rs6442336 rs6814436 rs6815608 rs72738886 rs72915163 rs76767978                                                                            |
| 126 | genus..Eubacteriumhalliigroup.id.11338  | Forced expiratory volume in 1-second (FEV1), Best measure | P9709V | vLGi8p | 0  | 0.84407731865204 0.668193814900146 0.698376200158779 0.690798646530392 0.5308644605799 0.739807398631071 0.894921488695476 0.741342076869718 0.884175172696556 0.975754520552605 0.685141726546094 0.520252870979576 0.785276625381635 0.630816760643593 0.856185191165861 0.893043614843415                                                                           | rs10501370 rs10798999 rs10808115 rs117748144 rs13116360 rs138531890 rs17074066 rs17474256 rs281379 rs28584818 rs60254196 rs630939 rs6550770 rs74018587 rs78056098 rs949971                                          |
| 127 | phylum.Cyanobacteria.id.1500            | Forced expiratory volume in 1-second (FEV1), Best measure | PcT6eJ | vLGi8p | 1  | 0.266556018341108 0.410825441781395 0.0360214546167972 0.272952569737501 0.248491035478917 0.278028645392675 0.301754357940901 0.0789623449686467                                                                                                                                                                                                                      | rs12555298 rs2585223 rs584122 rs61972390 rs7148504 rs76531781 rs789068 rs9864379                                                                                                                                    |
| 128 | genus.Phascolarctobacterium.id.2168     | Forced expiratory volume in 1-second (FEV1), Best measure | pCXxSP | vLGi8p | 0  | 0.563081496511375 0.74028396052097 0.961261409361381 0.904948238548574 0.386371992148514 0.940488992994433 0.871097755137167 0.56496411941149 0.948202952407912 0.602780551416418                                                                                                                                                                                      | rs11929846 rs12618201 rs1264476 rs28525131 rs56069061 rs56157888 rs74540770 rs74847270 rs75882962 rs7982713                                                                                                         |

|     | A                                                 | B                                                         | C      | D      | E | F                                                                                                                                                                                                                                                           | G                                                                                                                                              |
|-----|---------------------------------------------------|-----------------------------------------------------------|--------|--------|---|-------------------------------------------------------------------------------------------------------------------------------------------------------------------------------------------------------------------------------------------------------------|------------------------------------------------------------------------------------------------------------------------------------------------|
| 129 | genus.LachnospiraceaeUCG008.id.11328              | Forced expiratory volume in 1-second (FEV1), Best measure | PGIGHI | vLGi8p | 0 | 0.455021272807915 0.247004785133565 0.124595250724923 0.301072376691378 0.202894598248312 0.0844990482012131 0.413828699694911 0.23068588359635 0.369751324122227 0.311273058334544                                                                         | rs10741777 rs10793103 rs10801803 rs13024781 rs57254474 rs61944774 rs62277846 rs67078837 rs75356640 rs955844                                    |
| 130 | family.Acidaminococcaceae.id.2166                 | Forced expiratory volume in 1-second (FEV1), Best measure | pXAgfu | vLGi8p | 0 | 0.567522297980761 0.597056278944849 0.241226369722161 0.573869129161695 0.582971550844298 0.728056562466307 0.561404088151051                                                                                                                               | rs262812 rs2933324 rs45497800 rs6589457 rs6923842 rs74540770 rs78702810                                                                        |
| 131 | genus.Lactobacillus.id.1837                       | Forced expiratory volume in 1-second (FEV1), Best measure | q1bO5E | vLGi8p | 0 | 0.411078484740833 0.36771179235391 0.409851805927759 0.254828372826476 0.0527693603998555 0.0984752506461905 0.273003802520246                                                                                                                              | rs11674854 rs16861661 rs62314653 rs75127669 rs768253 rs77478751 rs921925                                                                       |
| 132 | genus.Methanobrevibacter.id.123                   | Forced expiratory volume in 1-second (FEV1), Best measure | Q3dvBY | vLGi8p | 0 | 0.978606166462765 0.826746524745035 0.081497794854398 0.450075755329265 0.810407543724267                                                                                                                                                                   | rs1334944 rs4802933 rs6776814 rs76029318 rs894996                                                                                              |
| 133 | genus.Intestinibacter.id.11345                    | Forced expiratory volume in 1-second (FEV1), Best measure | Q46NVk | vLGi8p | 0 | 0.362509680254498 0.301160297455024 0.224697156101224 0.407807709541571 0.516265655614413 0.457734210053937 0.202220835460141 0.735435728376516 0.532513290465051 0.156410421968926 0.396737841822733 0.440294705350119 0.233633780220507 0.453311021757045 | rs11109097 rs118030283 rs16938435 rs2098844 rs2702387 rs4327025 rs447950 rs478972 rs6062862 rs62430350 rs68093214 rs6875660 rs893394 rs9348442 |
| 134 | genus..Ruminococcustorquesgroup.id.14377          | Forced expiratory volume in 1-second (FEV1), Best measure | qE3Gq8 | vLGi8p | 0 | 0.131924911169594 0.0500965785502979 0.208868735673996 0.251147579186228 0.574927206451415 0.333544078587113 0.212631644001671 0.341856822993752 0.367610157425063                                                                                          | rs10904297 rs10967781 rs12434631 rs1475330 rs35866622 rs4073731 rs77034621 rs8080469 rs8141465                                                 |
| 135 | genus.Victivallis.id.2256                         | Forced expiratory volume in 1-second (FEV1), Best measure | qENaOR | vLGi8p | 0 | 0.509637176588488 0.703033575652022 0.964860862736767 0.841963975936259 0.482179670653777 0.840381152107504 0.877056348617666 0.97777604858214 0.775065811451988 0.846944180731406                                                                          | rs11899949 rs12512543 rs173120 rs1882775 rs2546432 rs342302 rs4764863 rs4895919 rs56349194 rs911666                                            |
| 136 | genus.Haemophilus.id.3698                         | Forced expiratory volume in 1-second (FEV1), Best measure | QGrGNV | vLGi8p | 0 | 0.679276288141488 0.878295424655319 0.422296893402177 0.88328498958012 0.315333926587734 0.704271165799482 0.96368958575001 0.9242372247608 0.778067827895213                                                                                               | rs10781340 rs111582866 rs35509 rs4822728 rs76022354 rs78909003 rs9328464 rs9382510 rs9895850                                                   |
| 137 | order.Selenomonadales.id.2165                     | Forced expiratory volume in 1-second (FEV1), Best measure | qiWbrh | vLGi8p | 1 | 0.330509987801178 0.31111779080406 0.126686008155614 0.169064233657826 0.163331449458697 0.183036801703148 0.161150087419419 0.139965663654808 0.294744674257107 0.0325169900113907 0.197153347464235                                                       | rs13086907 rs1643968 rs1649999 rs2834062 rs4463806 rs4722181 rs60274479 rs61249479 rs71405394 rs73232831 rs9423647                             |
| 138 | genus.LachnospiraceaeFCS020group.id.11314         | Forced expiratory volume in 1-second (FEV1), Best measure | QjakFr | vLGi8p | 0 | 0.897750861151526 0.594181521367474 0.765589627586824 0.412985273362355 0.836850496214121 0.680718390102971 0.488537705944125 0.52911880439049 0.720236924978868 0.584334604656195 0.572990336250053 0.296885783487599                                      | rs10093861 rs1254846 rs1363769 rs2322265 rs2862811 rs35035870 rs3999074 rs4452603 rs7249113 rs72793667 rs9308097 rs9788306                     |
| 139 | genus..Eubacteriumxylanophilumgroup.id.14375      | Forced expiratory volume in 1-second (FEV1), Best measure | Qyd7XB | vLGi8p | 2 | 0.21675319691948 0.264622074092534 0.217974033703184 0.122772275094912 0.04840126616102 0.103367986546001 0.180033811847294 0.201835429909001 0.0168538025038342                                                                                            | rs10140184 rs10917203 rs112176119 rs13239072 rs17830032 rs1999224 rs2012708 rs2213117 rs75586835                                               |
| 140 | genus..Ruminococcusgnavusgroup.id.14376           | Forced expiratory volume in 1-second (FEV1), Best measure | R6RQXL | vLGi8p | 0 | 0.967014378524799 0.752427463414978 0.676272433010772 0.964431035324925 0.716071102419302 0.265085812015211 0.697739608303446 0.891406700556605 0.56458117703371 0.866854735388176 0.70179808890048                                                         | rs11597105 rs11864644 rs12136548 rs12989336 rs13163520 rs2909242 rs3124783 rs4388134 rs62167033 rs78399089 rs9872758                           |
| 141 | genus.RuminococcaceaeUCG011.id.11368              | Forced expiratory volume in 1-second (FEV1), Best measure | R7oLoV | vLGi8p | 0 | 0.81786735410748 0.318762272105586 0.583767573229669 0.904687057590924 0.807583836911672 0.378826858697295 0.844019864665748                                                                                                                                | rs10274562 rs12724320 rs1416041 rs2729556 rs4490371 rs79113084 rs9729514                                                                       |
| 142 | genus.Bifidobacterium.id.436                      | Forced expiratory volume in 1-second (FEV1), Best measure | RKITkD | vLGi8p | 0 | 0.722900823855315 0.750697642592485 0.589302872921585 0.745026999295636 0.791297593307625 0.688469399027317 0.319622002941516 0.448532799109279 0.782244651274508 0.95090395861941 0.625378771512736                                                        | rs12022129 rs2491158 rs2686790 rs540489 rs55888705 rs56108664 rs5746486 rs62181700 rs73797465 rs75344046 rs857444                              |
| 143 | genus..Eubacteriumcoprostanoligenesgroup.id.11375 | Forced expiratory volume in 1-second (FEV1), Best measure | rlb7o5 | vLGi8p | 8 | 0.0417294202212867 0.0565240758123483 0.0528322303269198 0.00515318008392397 0.0203501684060335 0.0121524061598435 0.0432787159435704 0.0138915053858112 0.0436640199360339 0.0618114640627858 0.0211640822241057 0.0619638228542479 0.0507156185531059     | rs1020520 rs10444197 rs11052069 rs11720857 rs12906958 rs17159861 rs2644213 rs4076415 rs62024432 rs6762473 rs76898927 rs79895140 rs9648214      |
| 144 | genus.Ruminiclostridium9.id.11357                 | Forced expiratory volume in 1-second (FEV1), Best measure | RmoHnu | vLGi8p | 0 | 0.910196385585541 0.692712415137965 0.495782042912878 0.441805002997001 0.785822368562637 0.713117761648034 0.795199595028943 0.78830654145331 0.771939850934788                                                                                            | rs115044523 rs12040548 rs6082461 rs7137760 rs74303178 rs78191726 rs918449 rs9522712 rs9809789                                                  |

|     | A                                           | B                                                         | C               | D      | E | F                                                                                                                                                                                                                                                          | G                                                                                                                                                |
|-----|---------------------------------------------|-----------------------------------------------------------|-----------------|--------|---|------------------------------------------------------------------------------------------------------------------------------------------------------------------------------------------------------------------------------------------------------------|--------------------------------------------------------------------------------------------------------------------------------------------------|
| 145 | order.MollicutesRF9.id.11579                | Forced expiratory volume in 1-second (FEV1), Best measure | rsbOl <b>b</b>  | vLGi8p | 0 | 0.333065215650571 0.698142229667216 0.679961839417951 0.469943601749712 0.88214414964875 0.451119746378138 0.580261439958952 0.859682180254633 0.337676823534815 0.408169365517563 0.30697482136465 0.637047675785932 0.508054226927424                    | rs11779863 rs12566890 rs13100746 rs17235252 rs3932485 rs515984 rs638542 rs74603314 rs76373661 rs7706512 rs7801843 rs7853673 rs949341             |
| 146 | genus..Eubacteriumbrachygroup.id.11296      | Forced expiratory volume in 1-second (FEV1), Best measure | Rv99Lm          | vLGi8p | 0 | 0.681254841818464 0.713913844747483 0.826956055896702 0.735828393129454 0.294988408475818 0.493142931464508 0.501151302010839 0.544644238789398 0.48093194486292 0.0788241992222754                                                                        | rs112617308 rs12151423 rs13139592 rs1384962 rs2913110 rs4862235 rs62348779 rs6591893 rs720439 rs73199919                                         |
| 147 | genus.Howardella.id.2000                    | Forced expiratory volume in 1-second (FEV1), Best measure | sF7W2L          | vLGi8p | 0 | 0.911940825786776 0.705072366860446 0.590096870264246 0.69201772890931 0.597918290854209 0.878544996209539 0.427046523779394 0.812987041314771 0.336206181551186 0.407506957428136                                                                         | rs10048062 rs12452946 rs1484873 rs17167098 rs2154047 rs36081916 rs3791893 rs609430 rs672217 rs901099                                             |
| 148 | order.Burkholderiales.id.2874               | Forced expiratory volume in 1-second (FEV1), Best measure | sFxD <b>b</b> 3 | vLGi8p | 1 | 0.30096519224223 0.409196168668261 0.267124875506147 0.227656738278077 0.39974405241403 0.010582512444416 0.387893332143281 0.229840246774014 0.524514104909051 0.28435284052165                                                                           | rs1511453 rs1928341 rs2321387 rs2613606 rs4033856 rs6087811 rs62395635 rs75242906 rs7638039 rs9964679                                            |
| 149 | family.Victivallaceae.id.2255               | Forced expiratory volume in 1-second (FEV1), Best measure | Sgv0J4          | vLGi8p | 0 | 0.438581224777077 0.204836533048185 0.21620632282505 0.244678368835713 0.297152871429103 0.0691967446405996 0.406804728481613 0.0885927997744553 0.100611814266993 0.309665994637349 0.261679449930966 0.147600207698795                                   | rs11671100 rs11764871 rs2944282 rs34962571 rs4396289 rs61702987 rs62570196 rs6545794 rs67832247 rs7077363 rs7314815 rs7627405                    |
| 150 | family.Porphyromonadaceae.id.943            | Forced expiratory volume in 1-second (FEV1), Best measure | SpO9Ka          | vLGi8p | 0 | 0.981112154534081 0.420188829631389 0.721839693211017 0.838939916281396 0.64719217872512 0.629564081684691 0.857988591619889 0.610603507429336 0.28453178116494                                                                                            | rs10762312 rs10858364 rs17065783 rs1980561 rs35233670 rs35961441 rs6953849 rs7330827 rs864093                                                    |
| 151 | order.Rhodospirillales.id.2667              | Forced expiratory volume in 1-second (FEV1), Best measure | staWrf          | vLGi8p | 0 | 0.829846679232395 0.274992031864792 0.748612674614004 0.563981202149011 0.584766444966728 0.896117408164712 0.996086832756943 0.551872908328232 0.610298274312108 0.983764795071566 0.98930064648922 0.733057823501892 0.61472823707866                    | rs1035406 rs11591293 rs11630875 rs1549633 rs3730086 rs3754624 rs4278423 rs55876211 rs61933850 rs7001029 rs76784716 rs77304857 rs9813022          |
| 152 | class.Coriobacteriia.id.809                 | Forced expiratory volume in 1-second (FEV1), Best measure | szt6bn          | vLGi8p | 0 | 0.841377450184237 0.889811343614703 0.826262004919276 0.917290842790644 0.681259028613068 0.934728812255216 0.652251441116861 0.61963250312383 0.742123019956399 0.951266326721758 0.458263506829112 0.609491422306478 0.87174456222514 0.888238357357145  | rs11073596 rs11250875 rs11656361 rs12974142 rs13307134 rs1397793 rs1816223 rs240104 rs2442778 rs3025411 rs34739816 rs67561917 rs719099 rs8010111 |
| 153 | family.Oxalobacteraceae.id.2966             | Forced expiratory volume in 1-second (FEV1), Best measure | T35I <b>g</b> z | vLGi8p | 0 | 0.117117306512787 0.0973584976266639 0.245178269512501 0.18247088738283 0.212112362034109 0.113116514395354 0.493026593495883 0.185906332573894 0.318510434006345 0.270476617850728 0.224338333848289 0.347469454115582 0.38597922309999 0.241442484188104 | rs111966731 rs11246212 rs12002250 rs1569853 rs17138946 rs36057338 rs4428215 rs561239 rs6000536 rs62435498 rs736744 rs7993559 rs80330081 rs934049 |
| 154 | family.Peptococcaceae.id.2024               | Forced expiratory volume in 1-second (FEV1), Best measure | T8T6Lu          | vLGi8p | 2 | 0.0676902389029277 0.0578290645172411 0.0647985562442951 0.112853951965068 0.076207008440917 0.111608743111859 0.016332416965895 0.02358268403207 0.108644075914978                                                                                        | rs117452796 rs12144792 rs12634826 rs12992764 rs150600492 rs35703006 rs4990837 rs75430375 rs75898026                                              |
| 155 | genus.ChristensenellaceaeR.7group.id.11283  | Forced expiratory volume in 1-second (FEV1), Best measure | tbXTaX          | vLGi8p | 0 | 0.56710846547509 0.432661017860112 0.175647744096106 0.119060327399528 0.596790008187942 0.41738521903856 0.524387369884228 0.334435702469303 0.27014499523218 0.28065840795774                                                                            | rs10461257 rs17081797 rs60954665 rs62132810 rs62190261 rs62467127 rs73952017 rs78521377 rs79150079 rs892686                                      |
| 156 | genus..Eubacteriumfissicatenagroup.id.14373 | Forced expiratory volume in 1-second (FEV1), Best measure | TGrzdF          | vLGi8p | 0 | 0.651025148012321 0.681823463731321 0.498157236788526 0.640929456222726 0.876588336932236 0.984159647707508 0.973920196187359 0.0940033485793734                                                                                                           | rs11818408 rs11876297 rs151257695 rs1768152 rs2733072 rs3771393 rs6934739 rs7104872                                                              |
| 157 | genus.Slackia.id.825                        | Forced expiratory volume in 1-second (FEV1), Best measure | tkl5vG          | vLGi8p | 0 | 0.560316876308509 0.643744764061143 0.608564602973339 0.644259459037007 0.995256838960785 0.893252157494947                                                                                                                                                | rs10409783 rs12440440 rs16894137 rs35156985 rs4492265 rs8901                                                                                     |
| 158 | genus.RuminococcaceaeUCG004.id.11362        | Forced expiratory volume in 1-second (FEV1), Best measure | TIODZI          | vLGi8p | 0 | 0.667834672421832 0.77547367076128 0.631314610440036 0.872757915054205 0.91439328814806 0.527751772564272 0.810484653662594 0.765185260287588 0.805845575341913                                                                                            | rs10976229 rs11961899 rs12125734 rs2248146 rs3800154 rs511258 rs6769553 rs7569771 rs9818949                                                      |
| 159 | genus.LachnospiraceaeUCG004.id.11324        | Forced expiratory volume in 1-second (FEV1), Best measure | TQSp <b>i</b> B | vLGi8p | 0 | 0.347683073998326 0.88718602275804 0.97561721929844 0.900014871382481 0.980140042546448 0.845827809071687 0.48895357543617 0.824010968936214 0.88339528426517 0.836026850366325 0.991157587223277                                                          | rs11128180 rs12072562 rs12673420 rs12747809 rs12894272 rs233486 rs2726805 rs2882478 rs35182105 rs6656451 rs7629954                               |
| 160 | order.Bacteroidales.id.913                  | Forced expiratory volume in 1-second (FEV1), Best measure | tSliO9          | vLGi8p | 0 | 0.602828767678945 0.510144567395712 0.597313186431998 0.641379424270825 0.179751165511166 0.413321582764514 0.271997840331212 0.665454698358465 0.801675319524152 0.277998395731746 0.562054554531794                                                      | rs11146701 rs111845179 rs2032750 rs4146051 rs4916508 rs55773148 rs62531359 rs73975615 rs7631304 rs79585701 rs929878                              |

|     | A                                         | B                                                         | C      | D      | E | F                                                                                                                                                                                                                                                                             | G                                                                                                                                                             |
|-----|-------------------------------------------|-----------------------------------------------------------|--------|--------|---|-------------------------------------------------------------------------------------------------------------------------------------------------------------------------------------------------------------------------------------------------------------------------------|---------------------------------------------------------------------------------------------------------------------------------------------------------------|
| 161 | genus.LachnospiraceaeNC2004group.id.11316 | Forced expiratory volume in 1-second (FEV1), Best measure | TUj4LC | vLGi8p | 0 | 0.272632954380583 0.38848141896919 0.633055388922809 0.129291205791977 0.30976762639243 0.127487092788826 0.404626053420209 0.228029365038967 0.544356608632788                                                                                                               | rs117467633 rs12127733 rs12208226 rs12863463 rs17067076 rs1928659 rs1929743 rs3756315 rs6116753                                                               |
| 162 | order.Bacillales.id.1674                  | Forced expiratory volume in 1-second (FEV1), Best measure | uCOF7P | vLGi8p | 0 | 0.276997322050104 0.145029564952154 0.294495828662736 0.491916913585658 0.134103340097588 0.137573714102614 0.312109977135223 0.549223281246299                                                                                                                               | rs10410917 rs11034576 rs11207728 rs11844714 rs1287018 rs4617108 rs62640857 rs74420793                                                                         |
| 163 | genus.Akkermansia.id.4037                 | Forced expiratory volume in 1-second (FEV1), Best measure | uHEy8Q | vLGi8p | 0 | 0.414382390544591 0.32362347055886 0.536577998182793 0.261755179147945 0.273768882930059 0.620113090827384 0.494762211071095 0.284358496126387 0.892173338972687 0.685150901725818 0.503273348553043                                                                          | rs111862613 rs117107102 rs11729256 rs12908520 rs2602429 rs4242783 rs4936098 rs61779207 rs74542928 rs9349825 rs941682                                          |
| 164 | genus.Parabacteroides.id.954              | Forced expiratory volume in 1-second (FEV1), Best measure | uQYGEB | vLGi8p | 0 | 0.532161531969952 0.70484732191139 0.312017737200462 0.416837210623972 0.661136603964404 0.954599788633465                                                                                                                                                                    | rs114567323 rs115602804 rs4236095 rs60884758 rs6657302 rs7298818                                                                                              |
| 165 | class.Verrucomicrobiae.id.4029            | Forced expiratory volume in 1-second (FEV1), Best measure | UsMxlz | vLGi8p | 0 | 0.415497750135951 0.324052574827642 0.53742435453833 0.261987842628763 0.274019139803025 0.622201753750902 0.495604606355016 0.285486276350471 0.890974986312774 0.686547740057213 0.504054258206433                                                                          | rs111862613 rs117107102 rs11729256 rs12908520 rs2602429 rs4242783 rs4936098 rs61779207 rs74542928 rs9349825 rs941682                                          |
| 166 | class.Bacteroidia.id.912                  | Forced expiratory volume in 1-second (FEV1), Best measure | UTPK2n | vLGi8p | 0 | 0.602828767678945 0.510144567395712 0.597313186431998 0.641379424270825 0.179751165511166 0.413321582764514 0.271997840331212 0.665454698358465 0.801675319524152 0.277998395731746 0.562054554531794                                                                         | rs11146701 rs111845179 rs2032750 rs4146051 rs4916508 rs55773148 rs62531359 rs73975615 rs7631304 rs79585701 rs929878                                           |
| 167 | genus.Butyrivibrio.id.1993                | Forced expiratory volume in 1-second (FEV1), Best measure | UYJxH8 | vLGi8p | 0 | 0.487431666200734 0.877746244886439 0.557564972653411 0.234837242112661 0.634905545663049 0.877118474586285 0.502932607121378 0.411642871989954 0.522397363504754 0.374145344115988 0.661404477689463 0.512217708355376 0.616774601932448 0.484367998786977 0.327558192448134 | rs1007475 rs11761679 rs142855850 rs16934069 rs16941336 rs17163238 rs4537857 rs486484 rs4928024 rs72723662 rs74622183 rs77356209 rs7752361 rs7763512 rs9349693 |
| 168 | genus.Bacteroides.id.918                  | Forced expiratory volume in 1-second (FEV1), Best measure | Vd8Fsi | vLGi8p | 0 | 0.811684645427803 0.685998388809887 0.64129978753969 0.479937920915135 0.280390617961585 0.555906992826525 0.748845315401521 0.24351540922057 0.655784345028267                                                                                                               | rs11585893 rs13207588 rs1340391 rs17619981 rs2023437 rs66474973 rs66710942 rs6795673 rs9507307                                                                |
| 169 | family.Ruminococcaceae.id.2050            | Forced expiratory volume in 1-second (FEV1), Best measure | vlyGOP | vLGi8p | 0 | 0.493845223329033 0.816827313309611 0.217721363255091 0.79598693286163 0.67644345912129 0.559554457376776 0.817458121067837 0.870670835756117 0.583716164120371 0.78081870893645                                                                                              | rs10093275 rs10166469 rs1158100 rs1612733 rs17376049 rs2113833 rs3009418 rs55793120 rs56199908 rs76724913                                                     |
| 170 | genus.Olsenella.id.822                    | Forced expiratory volume in 1-second (FEV1), Best measure | W49loY | vLGi8p | 0 | 0.746183638607948 0.550213185438802 0.770698693152635 0.79461504567109 0.524113748195865 0.716204193401237 0.369927690874934 0.66973728802924 0.614097057236528 0.735762820369374 0.583948778633349                                                                           | rs1035588 rs17148768 rs2759329 rs35225860 rs6046522 rs61090148 rs62112538 rs72691585 rs7540303 rs8066522 rs9460691                                            |
| 171 | genus.Romboutsia.id.11347                 | Forced expiratory volume in 1-second (FEV1), Best measure | w5yhuV | vLGi8p | 0 | 0.932831939502274 0.922286937794777 0.842528247809325 0.760621630425022 0.744789820594451 0.83418268922006 0.659089456664723 0.84288187190432 0.71604708454379 0.706293500320766 0.877227301800376 0.984475906736119 0.940953369814602                                        | rs10279978 rs11221428 rs16843578 rs28603357 rs34302036 rs61841503 rs62504452 rs7109293 rs75200530 rs75987356 rs77702691 rs9389266 rs9567264                   |
| 172 | genus.Desulfovibrio.id.3173               | Forced expiratory volume in 1-second (FEV1), Best measure | WaNFee | vLGi8p | 0 | 0.566865448209251 0.359902490742849 0.676449495280698 0.294693698540908 0.854501336288808 0.902272664599865 0.38891424031579 0.322513563440427 0.674452506255701 0.754041065304838                                                                                            | rs12031543 rs13066142 rs16863365 rs2032031 rs2590913 rs2853179 rs4797774 rs6580353 rs72647089 rs7729080                                                       |
| 173 | genus.Anaerofilum.id.2053                 | Forced expiratory volume in 1-second (FEV1), Best measure | WCt5pC | vLGi8p | 0 | 0.711759727423925 0.866286763724092 0.94635786207366 0.698304105662375 0.84552024451213 0.665164772336864 0.818045918482023 0.939836040603172 0.121964244837193 0.743789067155349 0.769241997490569                                                                           | rs10794359 rs1563175 rs17012738 rs17096874 rs356049 rs4244069 rs4506496 rs712981 rs79598899 rs816292 rs9299345                                                |
| 174 | family.Alcaligenaceae.id.2875             | Forced expiratory volume in 1-second (FEV1), Best measure | WEMGli | vLGi8p | 5 | 0.0224894319382256 0.0274361723871523 0.0562782166206372 0.0634875901539032 0.0860946778896091 0.0839043146021172 0.0169960969053748 0.0971189098078281 0.0254359238485076 0.0436699483899979                                                                                 | rs112135816 rs1153990 rs147968 rs28480294 rs4033856 rs62395635 rs6969323 rs7638039 rs9537886 rs9964679                                                        |
| 175 | genus.Marvinbryantia.id.2005              | Forced expiratory volume in 1-second (FEV1), Best measure | wFbL6J | vLGi8p | 2 | 0.127649828892233 0.0956550354568485 0.0862756762033322 0.156772636214548 0.140936663420318 0.117585216939037 0.0412564481927244 0.0757924289388217 0.000296378701721272 0.118298518470472                                                                                    | rs11620597 rs1187983 rs146541147 rs2724813 rs2842896 rs2863363 rs3125832 rs61884471 rs72948274 rs8006832                                                      |
| 176 | genus.LachnospiraceaeUCG001.id.11321      | Forced expiratory volume in 1-second (FEV1), Best measure | wlF1Yn | vLGi8p | 0 | 0.591280890926449 0.755799538916584 0.621158115843637 0.988287966592946 0.543495639585985 0.382436984589194 0.595767062462347 0.201420714744955 0.647057650713102 0.767965522433506 0.490470840077379 0.31085569776215 0.53577914699214                                       | rs12131224 rs2050911 rs2371284 rs437876 rs4981345 rs573933 rs62496417 rs7341608 rs74034332 rs78848836 rs8104225 rs9403580 rs985416                            |

|     | A                                         | B                                                         | C       | D      | E  | F                                                                                                                                                                                                                                                                                                                               | G                                                                                                                                                                                  |
|-----|-------------------------------------------|-----------------------------------------------------------|---------|--------|----|---------------------------------------------------------------------------------------------------------------------------------------------------------------------------------------------------------------------------------------------------------------------------------------------------------------------------------|------------------------------------------------------------------------------------------------------------------------------------------------------------------------------------|
| 177 | genus.Veillonella.id.2198                 | Forced expiratory volume in 1-second (FEV1), Best measure | wJFco0  | vLGi8p | 2  | 0.0922135392181502 0.171427824164002 0.131402554143021 0.0355956207635349 0.170465998412621 0.158574692888404 0.110706201104079 0.0123378325971713                                                                                                                                                                              | rs11141494 rs1882878 rs2013594 rs55807413 rs62376424 rs6656807 rs7359080 rs742016                                                                                                  |
| 178 | genus.ErysipelotrichaceaeUCG003.id.11384  | Forced expiratory volume in 1-second (FEV1), Best measure | wn5rK2  | vLGi8p | 0  | 0.309295895511405 0.452434038610002 0.432991981123248 0.444105508882578 0.511629844358801 0.512388269916366 0.766796268962785 0.452897412009475 0.285800471176819 0.237810573140602 0.756854362170394 0.321398393860528 0.458247279424209 0.475626048209052 0.337088388651721 0.416542587797884                                 | rs10164067 rs11666127 rs11994308 rs12251396 rs17798136 rs28568391 rs4758231 rs59068084 rs59104037 rs62403464 rs6875357 rs73074432 rs74988980 rs75949021 rs76502207 rs8053479       |
| 179 | genus.Odoribacter.id.952                  | Forced expiratory volume in 1-second (FEV1), Best measure | wQYhwp  | vLGi8p | 0  | 0.734755398840298 0.36171902848407 0.924984036122795 0.764160017461594 0.864725014596955 0.93636054314273 0.317591770541394                                                                                                                                                                                                     | rs10093869 rs10423795 rs28417404 rs4793970 rs6856150 rs74553962 rs77779484                                                                                                         |
| 180 | genus..Eubacteriumeligensgroup.id.14372   | Forced expiratory volume in 1-second (FEV1), Best measure | WvdQyb  | vLGi8p | 0  | 0.512379731584631 0.254794492266181 0.70346295535495 0.120319710906191 0.408187698464033 0.289650140564024 0.334763419892838                                                                                                                                                                                                    | rs12719051 rs182318 rs2200429 rs265534 rs4583233 rs56080211 rs6923695                                                                                                              |
| 181 | class.Betaproteobacteria.id.2867          | Forced expiratory volume in 1-second (FEV1), Best measure | X4kHrP  | vLGi8p | 0  | 0.762435493246111 0.461693001504949 0.609754479076893 0.424513440569903 0.373705434685519 0.323240360642968 0.589926776608901 0.310487411768395 0.0723175193997886 0.574870022017305 0.383249854147309 0.443499157459903                                                                                                        | rs11128180 rs1511453 rs1928341 rs2321387 rs2613606 rs320161 rs4033856 rs56386628 rs6087811 rs62395635 rs75242906 rs9964679                                                         |
| 182 | genus.Dialister.id.2183                   | Forced expiratory volume in 1-second (FEV1), Best measure | xCuklr  | vLGi8p | 0  | 0.17774845990048 0.656631174244624 0.495887764845635 0.40131521802952 0.322243350953767 0.694846244316416 0.462355049178406 0.282524972990639 0.174826617844644 0.44551295403744                                                                                                                                                | rs10138457 rs10938938 rs11071887 rs11166701 rs2314294 rs4747450 rs4753063 rs75416973 rs764177 rs76680460                                                                           |
| 183 | family.Pasteurellaceae.id.3689            | Forced expiratory volume in 1-second (FEV1), Best measure | Xtkjtja | vLGi8p | 1  | 0.213549089609166 0.123264520991439 0.308166022253241 0.234345556890661 0.302662328146299 0.045851174057191 0.231284637398304 0.280016281924078 0.363417004063923 0.355579776270807 0.171536483331805 0.100891977138756 0.163413068979276 0.186850888154024                                                                     | rs10965428 rs111582866 rs12050685 rs16970009 rs35510 rs4822728 rs6972479 rs72756943 rs73139353 rs76022354 rs78909003 rs9382510 rs9895850 rs9938097                                 |
| 184 | genus.Intestinimonas.id.2062              | Forced expiratory volume in 1-second (FEV1), Best measure | XTu0EY  | vLGi8p | 0  | 0.887090458819137 0.856610398420521 0.797234806701484 0.680972589399637 0.745919605263293 0.783714013464542 0.490026881256073 0.867826078592055 0.228757513671654 0.920382988233484 0.841243465978492 0.890981731659808 0.961225110796561 0.938880966315725 0.841320054334737 0.896175142808244                                 | rs10262702 rs11258178 rs12226153 rs17067892 rs1859797 rs2276760 rs2731794 rs2930225 rs4113676 rs4784055 rs62240188 rs62427239 rs6934519 rs716604 rs7170984 rs9823439               |
| 185 | genus.Holdemania.id.2157                  | Forced expiratory volume in 1-second (FEV1), Best measure | XVFzMF  | vLGi8p | 0  | 0.806953200863664 0.662673397673412 0.17936127895046 0.515365454352522 0.616056279775458 0.694411868631304 0.646396007748129 0.89958457447507 0.734956533783231 0.874452865828182 0.53222503846175 0.583735107400122 0.749710701007849 0.392922335453278                                                                        | rs10885477 rs11080063 rs111745969 rs113593397 rs116500994 rs12701617 rs1867876 rs4146507 rs6133067 rs73139538 rs80149660 rs9500080 rs9529719 rs967319                              |
| 186 | genus.LachnospiraceaeND3007group.id.11317 | Forced expiratory volume in 1-second (FEV1), Best measure | y0FJ9U  | vLGi8p | 1  | 0.783230328098242 0.0161227910896847 0.967422269035127                                                                                                                                                                                                                                                                          | rs2861203 rs72776675 rs9932954                                                                                                                                                     |
| 187 | family.Methanobacteriaceae.id.121         | Forced expiratory volume in 1-second (FEV1), Best measure | Y7cF3n  | vLGi8p | 0  | 0.427492095982764 0.645029116635225 0.295436006894644 0.251854361318758 0.787733286158593 0.747562854145554 0.530630056795212 0.185039633419839                                                                                                                                                                                 | rs10424197 rs4257531 rs56131665 rs6508769 rs6776814 rs73068003 rs73457410 rs894996                                                                                                 |
| 188 | genus.Butyricoccus.id.2055                | Forced expiratory volume in 1-second (FEV1), Best measure | yakWtY  | vLGi8p | 0  | 0.311847223450196 0.257258616965847 0.852747608242086 0.615033720024085 0.660655408353921 0.772821353268945 0.954605692072777 0.81138859907263                                                                                                                                                                                  | rs10084203 rs12034718 rs12585793 rs2017189 rs4962426 rs56221232 rs62478070 rs7322368                                                                                               |
| 189 | genus.RuminococcaceaeUCG005.id.11363      | Forced expiratory volume in 1-second (FEV1), Best measure | yerlNC  | vLGi8p | 0  | 0.426017313025019 0.252160404897568 0.307812821968395 0.406950143304542 0.552488174613244 0.35720115562565 0.281772540276646 0.215848190281305 0.534915549910092 0.307922586005019 0.265806006724396 0.344604427782004 0.0567587982998287 0.342575827955053                                                                     | rs10873449 rs10937802 rs10950694 rs114279581 rs12288512 rs12458218 rs2893871 rs34781347 rs55793120 rs72776570 rs7449320 rs7555878 rs7586445 rs898577                               |
| 190 | family.Erysipelotrichaceae.id.2149        | Forced expiratory volume in 1-second (FEV1), Best measure | yfxJv6  | vLGi8p | 13 | 0.0133273620217314 0.0162911566357644 0.00214429917157366 0.00788337406520918 0.0385409710904978 0.00845566276565483 0.0148251663895242 0.001195739127494 0.0119844107836469 0.00618528041833126 0.00515159329548944 0.00958178461299759 0.0102752377970715                                                                     | rs1074800 rs10781552 rs17530232 rs1884466 rs2300774 rs290833 rs35161940 rs4078432 rs56970041 rs62504403 rs7234058 rs7826267 rs8003149                                              |
| 191 | genus.Fusicatenibacter.id.11305           | Forced expiratory volume in 1-second (FEV1), Best measure | ygbSF7  | vLGi8p | 0  | 0.51960493501182 0.362113316851507 0.437511589556472 0.28701274338641 0.480425985854253 0.390734486703622 0.30899274515435 0.289201000736966 0.362628126713527 0.628731120555139 0.541859733186919 0.274431305133136 0.443933120942861 0.825634314473619 0.43055161022417 0.253504453057852 0.488771651445586 0.442199796467286 | rs10439674 rs167879 rs1864685 rs2025938 rs206581 rs2132128 rs33303 rs4378146 rs60254196 rs62187631 rs62353480 rs6515626 rs704418 rs73103914 rs792108 rs8028026 rs8063430 rs9905659 |
| 192 | family.FamilyXIII.id.1957                 | Forced expiratory volume in 1-second (FEV1), Best measure | ylev3A  | vLGi8p | 0  | 0.589680614076983 0.451016680342585 0.643308715043495 0.941658607636491 0.941566233622884 0.81776004716383 0.588528880299695 0.753765523632736 0.736382352776235 0.61471020230214                                                                                                                                               | rs10404377 rs118170811 rs12904405 rs1887048 rs3098182 rs482905 rs6501525 rs66753613 rs6797051 rs7514702                                                                            |

|     | A                                      | B                                                         | C      | D      | E  | F                                                                                                                                                                                                                                                                                              | G                                                                                                                                                                     |
|-----|----------------------------------------|-----------------------------------------------------------|--------|--------|----|------------------------------------------------------------------------------------------------------------------------------------------------------------------------------------------------------------------------------------------------------------------------------------------------|-----------------------------------------------------------------------------------------------------------------------------------------------------------------------|
| 193 | genus.Senegalimassilia.id.11160        | Forced expiratory volume in 1-second (FEV1), Best measure | yLt27i | vLGi8p | 4  | 0.0256985653665495 0.141703941999002 0.027527402198544 0.00908866854189287 0.0124310602905863                                                                                                                                                                                                  | rs10036909 rs11787826 rs1990708 rs2017373 rs7225245                                                                                                                   |
| 194 | genus.Alistipes.id.968                 | Forced expiratory volume in 1-second (FEV1), Best measure | YXZeGZ | vLGi8p | 0  | 0.27125435672948 0.126011358064343 0.179394936244041 0.347785427501158 0.239423292124064 0.112219454537951 0.121704435721869 0.164118844012174 0.0858144277316944 0.134470465329271 0.101735008176689 0.315150821003413 0.137186392234981 0.256003912957666                                    | rs1107244 rs11769002 rs11958296 rs12990744 rs1689282 rs2290844 rs2450745 rs2875322 rs34417064 rs4810359 rs62576416 rs67705352 rs7129639 rs8130320                     |
| 195 | genus.Gordonibacter.id.821             | Forced expiratory volume in 1-second (FEV1), Best measure | YYHfMs | vLGi8p | 3  | 0.0902403085173934 0.253450592366734 0.0944704312585834 0.0390442179413577 0.0296712076395042 0.105401739543156 0.032476885589286 0.06547405375498 0.103943990936734 0.0568136350779015 0.0960624524166994                                                                                     | rs13412653 rs16955299 rs322296 rs35042269 rs3765837 rs4596722 rs71545975 rs72714787 rs72939513 rs7294633 rs768830                                                     |
| 196 | genus.Oscillospira.id.2064             | Forced expiratory volume in 1-second (FEV1), Best measure | zaZf8A | vLGi8p | 1  | 0.0220452980036272 0.634231970471878 0.436416762290461 0.323039517297614 0.300458967052363 0.678105338656037 0.296068798008066 0.401516019973113                                                                                                                                               | rs12206468 rs12925026 rs1954532 rs28889936 rs62422654 rs72866977 rs751183 rs8076323                                                                                   |
| 197 | class.Erysipelotrichia.id.2147         | Forced expiratory volume in 1-second (FEV1), Best measure | ZJXDpG | vLGi8p | 13 | 0.0133273620217314 0.0162911566357644 0.00214429917157366 0.00788337406520918 0.0385409710904978 0.00845566276565483 0.0148251663895242 0.001195739127494 0.0119844107836469 0.00618528041833126 0.00515159329548944 0.00958178461299759 0.0102752377970715                                    | rs1074800 rs10781552 rs17530232 rs1884466 rs2300774 rs290833 rs35161940 rs4078432 rs56970041 rs62504403 rs7234058 rs7826267 rs8003149                                 |
| 198 | genus.Allisonella.id.2174              | Forced expiratory volume in 1-second (FEV1), Best measure | zkWLyI | vLGi8p | 0  | 0.824661723895697 0.584662047989331 0.941757929072492 0.822935074133243 0.552634592589998 0.702040723857445 0.734154778828323 0.938631352438535                                                                                                                                                | rs1901739 rs35110698 rs35778461 rs594561 rs602075 rs6742198 rs76904847 rs7898615                                                                                      |
| 199 | genus.Eggerthella.id.819               | Forced vital capacity (FVC), Best measure                 | 0aMbT3 | j7whIN | 0  | 0.598166012650771 0.981976035961794 0.84545719645421 0.683879375873613 0.739779583079226 0.924150384232807 0.665403295859286 0.732150415670082 0.767157635008303 0.848401932479767 0.645607383044501                                                                                           | rs112205261 rs13070736 rs1784446 rs2223081 rs2240838 rs2877457 rs3851328 rs4985746 rs6430926 rs67490567 rs76663501                                                    |
| 200 | genus.Lactococcus.id.1851              | Forced vital capacity (FVC), Best measure                 | 0heWA4 | j7whIN | 0  | 0.405024861768272 0.615487662665795 0.514557051069769 0.655790260853812 0.257737354654723 0.798342152420129 0.303559827182597 0.515189058699411 0.996946502214474                                                                                                                              | rs10417872 rs123059 rs12621813 rs17168302 rs2293361 rs4766997 rs55910161 rs6674304 rs7992246                                                                          |
| 201 | genus.DefluviitaleaceaeUCG011.id.11287 | Forced vital capacity (FVC), Best measure                 | 0lsDJy | j7whIN | 0  | 0.401360875773143 0.711539945413468 0.657732399281339 0.372696857324519 0.402560810297867 0.508727513017222 0.101002902721063 0.392822017692512 0.684408827294351                                                                                                                              | rs112893842 rs1582238 rs2892880 rs4344384 rs4677103 rs55658617 rs72731813 rs9608282 rs9725395                                                                         |
| 202 | genus.Flavonifractor.id.2059           | Forced vital capacity (FVC), Best measure                 | 0ngO8p | j7whIN | 0  | 0.848944215712813 0.933105112410334 0.341341583904643 0.943973092046417 0.331517464081994                                                                                                                                                                                                      | rs114873521 rs11811696 rs12030302 rs34066017 rs806808                                                                                                                 |
| 203 | genus.Lachnospira.id.2004              | Forced vital capacity (FVC), Best measure                 | 0rTnk2 | j7whIN | 0  | 0.594573536368622 0.402401694630096 0.462529411356379 0.921944168969404 0.929900019209765 0.978972208233794                                                                                                                                                                                    | rs13157098 rs159484 rs2520509 rs4686798 rs4923324 rs56791201                                                                                                          |
| 204 | phylum.Firmicutes.id.1672              | Forced vital capacity (FVC), Best measure                 | 0rWmph | j7whIN | 0  | 0.428703817910324 0.561733336539704 0.343648242548492 0.733723601854653 0.614804281016344 0.260624730779815 0.45697036584762 0.520488411175429 0.478854329750036 0.338522288758566 0.147622071739066 0.389391870110543 0.444923830456842 0.425751393692482 0.689016979821991 0.477909736049958 | rs112334273 rs2009919 rs2273429 rs2332027 rs2547978 rs36111799 rs3792064 rs3852931 rs4750583 rs56199908 rs6814436 rs6815608 rs7247191 rs72738886 rs72771021 rs8085381 |
| 205 | genus.Hungatella.id.11306              | Forced vital capacity (FVC), Best measure                 | 0Vfsi1 | j7whIN | 0  | 0.245524201484417 0.397431745499394 0.772140386767673 0.412026209705049 0.244077750931607                                                                                                                                                                                                      | rs10044993 rs13128780 rs13249325 rs17092615 rs72759041                                                                                                                |
| 206 | genus.FamilyXIIIUCG001.id.11294        | Forced vital capacity (FVC), Best measure                 | 1rpkul | j7whIN | 0  | 0.758604183875384 0.704878463999838 0.692543824525351 0.743078456413226 0.612481461640635 0.470686670249378 0.284681238484338 0.660988316262385                                                                                                                                                | rs112362903 rs12049454 rs1426266 rs3842897 rs62414802 rs7119679 rs76463770 rs8076666                                                                                  |
| 207 | genus.Escherichia.Shigella.id.3504     | Forced vital capacity (FVC), Best measure                 | 1uqUdL | j7whIN | 7  | 0.0894185637814972 0.0198815049203859 0.04227742071278 0.0665394864858344 0.0171189856045226 0.0137985158762681 0.0168491081507267 0.0169075553874579 0.0130290941905768 0.0621795012883085                                                                                                    | rs112767262 rs113127095 rs113513883 rs1154904 rs118526 rs2798105 rs4731451 rs57024273 rs592299 rs73208162                                                             |
| 208 | family.Streptococcaceae.id.1850        | Forced vital capacity (FVC), Best measure                 | 1zf0TZ | j7whIN | 0  | 0.197139567379353 0.207798772334684 0.239865117331102 0.512254038849251 0.544577000052325 0.377904895452007 0.497555948448722 0.519148450275774 0.362290288539397 0.254661490476776 0.0902441544127163 0.28741208889836                                                                        | rs10028567 rs111110281 rs2370083 rs35344081 rs4968759 rs57646748 rs6806351 rs72739637 rs77968078 rs7916711 rs957755 rs9903102                                         |
| 209 | genus.Holdemanella.id.11393            | Forced vital capacity (FVC), Best measure                 | 20HL0T | j7whIN | 0  | 0.905539259590748 0.279909035526299 0.661183527982334 0.92097358623117 0.917780612167908 0.986446200116993 0.898981741353126 0.978931700965537 0.973040706726647 0.830245238525914 0.585165360566033                                                                                           | rs12513188 rs17586763 rs1926302 rs34187114 rs35228298 rs4541991 rs607782 rs62113381 rs73011279 rs75764681 rs8113760                                                   |
| 210 | genus.Ruminococcus2.id.11374           | Forced vital capacity (FVC), Best measure                 | 2GJP3o | j7whIN | 0  | 0.55848718282941 0.659418485347476 0.491460686304545 0.48407033615361 0.968415466545858 0.657129408130456 0.848616833547111 0.636659931520998 0.813963901798039 0.647236694281435 0.856123981842061 0.597134986413005 0.507432341647429 0.632514039999013                                      | rs12406309 rs12986628 rs1819812 rs2368224 rs2846589 rs2997412 rs4400279 rs4799823 rs55707116 rs58681734 rs61791565 rs7635831 rs7693984 rs78120384                     |
| 211 | phylum.Euryarchaeota.id.55             | Forced vital capacity (FVC), Best measure                 | 2neTKK | j7whIN | 0  | 0.698436996106063 0.8862519056828 0.767711999886368 0.786970360623305 0.834326050640557 0.518646365945573 0.817610180908852 0.93973360708447 0.840129295821732 0.699571013794353 0.595710866020661                                                                                             | rs11022995 rs34928225 rs45498998 rs56131665 rs6064552 rs6508769 rs7015093 rs76029318 rs7635189 rs77658038 rs894996                                                    |





|     | A                                           | B                                         | C      | D      | E  | F                                                                                                                                                                                                                                                         | G                                                                                                                                                  |
|-----|---------------------------------------------|-------------------------------------------|--------|--------|----|-----------------------------------------------------------------------------------------------------------------------------------------------------------------------------------------------------------------------------------------------------------|----------------------------------------------------------------------------------------------------------------------------------------------------|
| 252 | genus.LachnospiraceaeNK4A136group.id.11319  | Forced vital capacity (FVC), Best measure | Bt0kEx | j7whIN | 0  | 0.169232621448222 0.355834616271449 0.226914356704777 0.174876009803048 0.325185647164646 0.374086939324265 0.350558345770234 0.100896790368513 0.263477367047083 0.586587811704475 0.55918170564276 0.406158271221695 0.281981597649675                  | rs11263806 rs12611395 rs160061 rs28540839 rs2880566 rs4955932 rs59805249 rs68104925 rs73044693 rs7616165 rs76193507 rs7832116 rs954878             |
| 253 | family.Rhodospirillaceae.id.2717            | Forced vital capacity (FVC), Best measure | Bt1upE | j7whIN | 0  | 0.505140998053519 0.535233849266122 0.514470835429923 0.62531628845402 0.311480471214918 0.183242252046034 0.571919128818743 0.475019060848494 0.491540625023486 0.1690935516325 0.680078137305946 0.332968414866133 0.312018788779557 0.391402352284745  | rs1035406 rs11591293 rs1549633 rs1923415 rs3754624 rs4278423 rs55876211 rs61933850 rs6679026 rs7001029 rs72714493 rs74354280 rs76784716 rs9813022  |
| 254 | order.Victivallales.id.2254                 | Forced vital capacity (FVC), Best measure | C1xV1V | j7whIN | 0  | 0.826152585475658 0.512045627663948 0.727490783031059 0.563111103576266 0.188133324770009 0.881453233291237 0.871677031862393 0.403881547887175                                                                                                           | rs1002941 rs11770843 rs17114848 rs2031282 rs2825714 rs62570196 rs72640280 rs77599476                                                               |
| 255 | genus.Sellimonas.id.14369                   | Forced vital capacity (FVC), Best measure | c62fwk | j7whIN | 0  | 0.821348386129019 0.0718024981101734 0.434060149108455 0.940465788022173 0.462254768674083 0.513113546018457 0.550616934311162 0.63600376493634                                                                                                           | rs113379006 rs2016057 rs2187447 rs2371572 rs41816 rs4600608 rs553697 rs56203279                                                                    |
| 256 | genus.Coproccoccus1.id.11301                | Forced vital capacity (FVC), Best measure | cqFLTQ | j7whIN | 0  | 0.277556353382619 0.588008613989234 0.540329693750812 0.318892371787033 0.424030999276421 0.586596293547359 0.433602048062598 0.37189505729261 0.871961063432921 0.405087340025349 0.312517758856198 0.919705143486362                                    | rs1010560 rs12794898 rs1519491 rs1576241 rs1762123 rs2907920 rs4277593 rs56405618 rs73031725 rs73167075 rs74101919 rs946513                        |
| 257 | family.ClostridialesvadinBB60group.id.11286 | Forced vital capacity (FVC), Best measure | CUtsMo | j7whIN | 0  | 0.809933620125379 0.797519220282454 0.821010344505603 0.65672245297439 0.956834956702035 0.70531911198891 0.923871258706095 0.839514304728584 0.967418732580466 0.803385268665902 0.898072500910935 0.672608864846404 0.931955804431642 0.625478029875603 | rs10517600 rs10904722 rs13409132 rs17121075 rs2191834 rs28691777 rs34088226 rs55682560 rs6588624 rs66714985 rs7226487 rs7538034 rs7725895 rs989682 |
| 258 | order.Actinomycetales.id.420                | Forced vital capacity (FVC), Best measure | CYNr8c | j7whIN | 0  | 0.373287864956861 0.444195530127186 0.243048635020992 0.576839305682422 0.189602555578682                                                                                                                                                                 | rs2889192 rs34583783 rs35011108 rs4073240 rs58484246                                                                                               |
| 259 | family.Lactobacillaceae.id.1836             | Forced vital capacity (FVC), Best measure | d9u3Wa | j7whIN | 0  | 0.415164947963203 0.348020906898792 0.431394581291876 0.43296432783145 0.140550945594244 0.100435008742724 0.304156675320538 0.0869260066411993                                                                                                           | rs11674854 rs16861661 rs62314653 rs74599091 rs768253 rs77478751 rs921925 rs9345899                                                                 |
| 260 | class.Alphaproteobacteria.id.2379           | Forced vital capacity (FVC), Best measure | dP6VTT | j7whIN | 0  | 0.603820815092848 0.586324974851395 0.220808737280953 0.809913209509378 0.710848372482628 0.561615277167496 0.505498787106586                                                                                                                             | rs140912403 rs34569731 rs55876211 rs62285697 rs76784716 rs7960664 rs9813022                                                                        |
| 261 | order.Enterobacteriales.id.3468             | Forced vital capacity (FVC), Best measure | dSCeM7 | j7whIN | 0  | 0.751116858131747 0.722558651286883 0.484101492445467 0.935589757678747 0.685565295216785 0.307716613843574 0.779323454430102                                                                                                                             | rs11026530 rs2374342 rs35673018 rs504442 rs62210023 rs78143293 rs79757635                                                                          |
| 262 | family.BacteroidalesS24.7group.id.11173     | Forced vital capacity (FVC), Best measure | DwGyne | j7whIN | 8  | 0.0011663806614653 0.0105710264644951 0.00284389714579147 0.0053399135509847 0.00645811838822866 0.0264977820277505 0.0121447135646181 0.00447033696213957                                                                                                | rs10872669 rs12748533 rs17043785 rs61508842 rs689695 rs738193 rs78609301 rs941000                                                                  |
| 263 | genus.Oxalobacter.id.2978                   | Forced vital capacity (FVC), Best measure | E1ZDX3 | j7whIN | 0  | 0.82239557843057 0.809379874649696 0.907835670819163 0.982746986822724 0.891042019434948 0.697679329153872 0.759506668999389 0.218396969141883 0.890845115125841 0.950371647372297 0.977807829584923                                                      | rs10464997 rs11108500 rs111966731 rs12002250 rs1569853 rs36057338 rs3862635 rs4428215 rs6000536 rs6993398 rs736744                                 |
| 264 | genus.Dorea.id.1997                         | Forced vital capacity (FVC), Best measure | e5mJnF | j7whIN | 1  | 0.0325220800601906 0.287608819878798 0.320218873561653 0.307810105528442 0.0988894588953971 0.126211722716033 0.157090341211291 0.233538210363732 0.256710584207659 0.169690271089321                                                                     | rs11150408 rs12537781 rs13279148 rs1899291 rs3005511 rs345219 rs3752849 rs4793307 rs62503162 rs73729431                                            |
| 265 | genus.Ruminococcus1.id.11373                | Forced vital capacity (FVC), Best measure | ebP4zV | j7whIN | 0  | 0.480556470424436 0.503873873019838 0.182711011271305 0.286047590494186 0.205255944150523 0.396006582555579 0.0883919105550275 0.237335998987182 0.497330187153013 0.465202564551442                                                                      | rs10167839 rs11783695 rs17781867 rs3819978 rs6105066 rs6493760 rs7117576 rs7583465 rs78572139 rs78613526                                           |
| 266 | family.Clostridiaceae1.id.1869              | Forced vital capacity (FVC), Best measure | FcqSNY | j7whIN | 0  | 0.988642995525713 0.781433898406908 0.263691710664706 0.675424672000744 0.967350939224608 0.642257579125746 0.761594090026677 0.710868309860136 0.955436800144823 0.858139595252013                                                                       | rs10875374 rs12186080 rs12341505 rs2795528 rs2817172 rs4723021 rs550843 rs56188186 rs62397761 rs881532                                             |
| 267 | phylum.Verrucomicrobia.id.3982              | Forced vital capacity (FVC), Best measure | fE3r8h | j7whIN | 0  | 0.2228553259025 0.131221407362981 0.243451842764053 0.254777167900157 0.0532043468960923 0.143358760130754 0.157863319477082 0.2842600611187 0.0852523725929602 0.372894493102384 0.0706620064607236 0.209402206731908                                    | rs11252894 rs117107102 rs11729256 rs12512971 rs12908520 rs2602429 rs3995795 rs45598138 rs61779207 rs74542928 rs76430504 rs9349825                  |
| 268 | family.Actinomycetaceae.id.421              | Forced vital capacity (FVC), Best measure | FFi1Rd | j7whIN | 0  | 0.374798589099384 0.445665965256107 0.244257261856327 0.577247681118294 0.190084104506133                                                                                                                                                                 | rs2889192 rs34583783 rs35011108 rs4073240 rs58484246                                                                                               |
| 269 | order.Erysipelotrichales.id.2148            | Forced vital capacity (FVC), Best measure | FIVBaS | j7whIN | 13 | 0.0190864436033762 0.0204278319561581 0.00514379561895584 0.0128975748833661 0.044025440517228 0.0267144363472665 0.0238533488661673 0.00295744485160947 0.019745934461714 0.006968502923956 0.0159003614145526 0.0146194089731121 0.0268884917550883     | rs1074800 rs10781552 rs17530232 rs1884466 rs2300774 rs290833 rs35161940 rs4078432 rs56970041 rs62504403 rs7234058 rs7826267 rs8003149              |
| 270 | class.Clostridia.id.1859                    | Forced vital capacity (FVC), Best measure | Fr2Ff4 | j7whIN | 10 | 0.0193689608665802 0.0145522830359881 0.0316929900949068 0.0506483863218718 0.00271836089415483 0.0331006657151053 0.0432481521685981 0.0551810481497423 0.0254594617959814 0.0155771523281369 0.00979050937603693 0.040506887861814                      | rs10774377 rs112334273 rs13105690 rs13179700 rs1842454 rs2273429 rs6797343 rs6814436 rs6815608 rs72738886 rs72915163 rs76767978                    |
| 271 | class.Gammaproteobacteria.id.3303           | Forced vital capacity (FVC), Best measure | FRQYhm | j7whIN | 1  | 0.0324699575291509 0.233728799409286 0.260051438401116 0.412947200765554 0.339641008153693 0.57269136053695 0.174919622114423                                                                                                                             | rs11181912 rs12404135 rs2234691 rs6706173 rs75101789 rs79795896 rs9494710                                                                          |
| 272 | genus.Actinomyces.id.423                    | Forced vital capacity (FVC), Best measure | FT7OrH | j7whIN | 1  | 0.487012508472826 0.320580604945973 0.215526740383144 0.366304470064399 0.31307201629921 0.0432513966954461 0.238335129432222                                                                                                                             | rs2715439 rs34583783 rs35011108 rs4073240 rs4146653 rs71315246 rs7915461                                                                           |



|     | A                                            | B                                         | C      | D      | E  | F                                                                                                                                                                                                                                                                                                                         | G                                                                                                                                                                                    |
|-----|----------------------------------------------|-------------------------------------------|--------|--------|----|---------------------------------------------------------------------------------------------------------------------------------------------------------------------------------------------------------------------------------------------------------------------------------------------------------------------------|--------------------------------------------------------------------------------------------------------------------------------------------------------------------------------------|
| 292 | genus.RuminococcaceaeUCG010.id.11367         | Forced vital capacity (FVC), Best measure | kjA5PB | j7whlN | 1  | 0.0628443434204404 0.100247753872641 0.0848763886116424 0.0668745800527065 0.123622754910503 0.0431263438950343                                                                                                                                                                                                           | rs12597105 rs2820282 rs682403 rs6958419 rs73218807 rs7441445                                                                                                                         |
| 293 | family.Defluviitaleaceae.id.1924             | Forced vital capacity (FVC), Best measure | kodRd1 | j7whlN | 0  | 0.515335712383971 0.914928194189592 0.480274456144616 0.727899213954181 0.479653586891788 0.515266437510297 0.524932972808651 0.651562594061893 0.209465863168063 0.505837000683992 0.880383376198522                                                                                                                     | rs112893842 rs1582238 rs17051335 rs1908593 rs4344384 rs4677103 rs540220 rs55658617 rs72731813 rs9608282 rs9725395                                                                    |
| 294 | genus.Prevotella7.id.11182                   | Forced vital capacity (FVC), Best measure | LCZ8yH | j7whlN | 0  | 0.819874679678099 0.753601354582206 0.764817929936382 0.524481709064158 0.817590612967949 0.842812004804313 0.775456998193139 0.960919086270195 0.963259345430893 0.819477860958863 0.600269826703908                                                                                                                     | rs118038478 rs12124567 rs12195431 rs2240542 rs2918132 rs430270 rs57404562 rs79263163 rs9426434 rs9608249 rs9959718                                                                   |
| 295 | genus.RuminococcaceaeUCG003.id.11361         | Forced vital capacity (FVC), Best measure | lJcl8y | j7whlN | 0  | 0.395147521757784 0.483819125920047 0.415600490995709 0.386970046553385 0.670049664246454 0.337162755919544 0.296112981938864 0.0893577088333435 0.300013733658737 0.221398819675492 0.47396405070964 0.352213658910526                                                                                                   | rs10490280 rs11243416 rs11613919 rs16959793 rs2523124 rs3013089 rs4452755 rs4532474 rs646327 rs6759615 rs73341549 rs78720113                                                         |
| 296 | genus.Terrisporobacter.id.11348              | Forced vital capacity (FVC), Best measure | LKYg6S | j7whlN | 0  | 0.580618700954576 0.669833790872547 0.342893382815151 0.0900180869705106 0.577960506983397                                                                                                                                                                                                                                | rs1883097 rs2569953 rs2872237 rs58405430 rs7184125                                                                                                                                   |
| 297 | family.Bifidobacteriaceae.id.433             | Forced vital capacity (FVC), Best measure | LRKdla | j7whlN | 0  | 0.101864071187836 0.233678558237634 0.136445489314631 0.464049706698739 0.235837135587327 0.288340695924667 0.0635535231591949 0.285687920384215 0.282496583376662 0.121648725698124                                                                                                                                      | rs10831953 rs12446429 rs13020688 rs4957061 rs540489 rs55888705 rs6899771 rs7174549 rs73797465 rs857444                                                                               |
| 298 | order.Desulfovibrionales.id.3156             | Forced vital capacity (FVC), Best measure | m0ByAU | j7whlN | 12 | 0.0166935537517799 0.00224130657375126 0.00407758526363226 0.000395650734296929 0.000626270544949594 0.000576667854508903 0.000656305676205055 0.00255384720162661 0.00578811215285547 0.00421950372958697 0.00135571179315986 0.00437137033345839                                                                        | rs112381107 rs11599763 rs17791387 rs186073 rs2692012 rs2838334 rs3935584 rs4506934 rs6058181 rs62020470 rs72647048 rs9928243                                                         |
| 299 | family.Enterobacteriaceae.id.3469            | Forced vital capacity (FVC), Best measure | m9LXEq | j7whlN | 0  | 0.751116858131747 0.722558651286883 0.484101492445467 0.935589757678747 0.685565295216785 0.307716613843574 0.779323454430102                                                                                                                                                                                             | rs11026530 rs2374342 rs35673018 rs504442 rs62210023 rs78143293 rs79757635                                                                                                            |
| 300 | family.Coriobacteriaceae.id.811              | Forced vital capacity (FVC), Best measure | MBOR7Y | j7whlN | 0  | 0.646637456678828 0.463447426821852 0.705765764420859 0.512442017250737 0.658675266722998 0.525243797189079 0.733478683098149 0.798728508748402 0.209086316932271 0.488151863738188 0.947781710377297 0.757377121064375 0.58571961441836 0.293470969942099                                                                | rs11073596 rs11250875 rs11656361 rs12974142 rs13307134 rs1397793 rs1816223 rs240104 rs2442778 rs3025411 rs34739816 rs67561917 rs719099 rs8010111                                     |
| 301 | genus.Lachnodostridium.id.11308              | Forced vital capacity (FVC), Best measure | MpL626 | j7whlN | 0  | 0.955001607266647 0.622082216814248 0.836772090670716 0.716397461399261 0.684053853259982 0.918069547471279 0.724460116438543 0.775499224507586 0.986020835593212 0.724831760804133 0.271425306548378 0.739578322569026 0.859960639487592                                                                                 | rs1031599 rs12566975 rs1528479 rs1997204 rs2385421 rs3821998 rs4738679 rs6112314 rs615997 rs62285313 rs72829893 rs78068103 rs789029                                                  |
| 302 | class.Melainabacteria.id.1589                | Forced vital capacity (FVC), Best measure | Msb4zz | j7whlN | 0  | 0.481797184106987 0.480357672989261 0.288016501701172 0.350151520957687 0.28446426326108 0.344761808023021 0.10269236410746 0.442004606221575 0.862128370774148 0.231592497146058                                                                                                                                         | rs10148250 rs10738747 rs11150282 rs113884518 rs28678345 rs367480 rs4129395 rs789069 rs79790072 rs9864379                                                                             |
| 303 | class.Negativicutes.id.2164                  | Forced vital capacity (FVC), Best measure | MXS84H | j7whlN | 0  | 0.362949788434635 0.551504865716197 0.261399367196489 0.304022443881327 0.222916062451259 0.192439306238945 0.2768937644528 0.39298640235662 0.327742698133672 0.0645577387726913 0.329652147137934                                                                                                                       | rs13086907 rs1643968 rs1649999 rs2834062 rs4463806 rs4722181 rs60274479 rs61249479 rs71405394 rs73232831 rs9423647                                                                   |
| 304 | genus.Barnesiella.id.944                     | Forced vital capacity (FVC), Best measure | mz9jd0 | j7whlN | 1  | 0.22420627123096 0.274568432273497 0.251555485249154 0.014162362467078 0.285108647093202 0.501819367040652 0.566351966384854 0.290007608632797 0.243945572531305 0.217947543441399 0.199320210688186 0.328096836980007 0.31568695570332 0.319676941315841                                                                 | rs11155559 rs113258194 rs12909713 rs13242616 rs199035 rs2276875 rs2428166 rs35177866 rs60316894 rs62251337 rs72684847 rs76181748 rs77455852 rs79795328                               |
| 305 | class.Deltaproteobacteria.id.3087            | Forced vital capacity (FVC), Best measure | n3j0op | j7whlN | 13 | 0.000670511274906938 0.0037614895651407 0.000290666623942883 0.000117225923056638 0.000623220303457257 0.000100430206001905 9.69529378642575e-05 0.000101724922760031 0.000339988982046902 0.000148302273131168 0.00160561506314296 0.000662059885929733 0.00119287095143918                                              | rs1035691 rs112381107 rs11599763 rs17084793 rs17791387 rs2692012 rs2838334 rs3935584 rs4506934 rs55744759 rs6058181 rs62020470 rs9928243                                             |
| 306 | family.Lachnospiraceae.id.1987               | Forced vital capacity (FVC), Best measure | nFIaU5 | j7whlN | 4  | 0.0898626329855809 0.0293972664949359 0.0358458964266131 0.1035088742899 0.0874825133111342 0.0428381962929199 0.0780707365358223 0.130317795551782 0.0181892040758306 0.117878700094997 0.160883830337357 0.127664417217922 0.103683041832541 0.0661810198215217 0.114059706531348 0.0569470451303242 0.0647669716722952 | rs10402491 rs11139361 rs112040820 rs11841382 rs11979110 rs1205443 rs12760724 rs13005175 rs146660815 rs2159863 rs2910921 rs3127230 rs35524804 rs7359994 rs79086868 rs959845 rs9929145 |
| 307 | genus.Peptococcus.id.2037                    | Forced vital capacity (FVC), Best measure | nlesEv | j7whlN | 0  | 0.745822894295145 0.845331484803832 0.56809253046374 0.839595065432391 0.870134387873009 0.381373618447507 0.592496792560203 0.877284201174593 0.701384112465257 0.69009518480379 0.870504473498037 0.749056409153551                                                                                                     | rs10031059 rs11001941 rs12069354 rs2054133 rs36121075 rs413827 rs5770862 rs6918730 rs7033353 rs72850165 rs74592222 rs77681628                                                        |
| 308 | order.Methanobacteriales.id.120              | Forced vital capacity (FVC), Best measure | NKNDGp | j7whlN | 0  | 0.640612012509955 0.599296583720763 0.410522556143889 0.207641390180512 0.746419741482467 0.645152599184827 0.5296447358175 0.250255283470213                                                                                                                                                                             | rs10424197 rs4257531 rs56131665 rs6508769 rs6776814 rs73068003 rs73457410 rs894996                                                                                                   |
| 309 | genus.Eubacteriumoxidoreducensgroup.id.11339 | Forced vital capacity (FVC), Best measure | nnD7ru | j7whlN | 0  | 0.831031802054816 0.480095719956471 0.61753951741659 0.0742132640130408 0.709972874427463                                                                                                                                                                                                                                 | rs12129908 rs12423772 rs2973294 rs34561138 rs440215                                                                                                                                  |
| 310 | genus.FamilyXIIID3011group.id.11293          | Forced vital capacity (FVC), Best measure | NqdTjG | j7whlN | 0  | 0.442875730521245 0.349470728182487 0.66446035715201 0.76186185380067 0.852398995291402 0.523474297073426 0.407275903604314 0.799348194559078 0.566433831087235 0.395474179753554 0.676808725132234                                                                                                                       | rs11126423 rs11736617 rs12812672 rs149302 rs16840310 rs16940167 rs17156849 rs62029761 rs62200412 rs72730932 rs9837139                                                                |
| 311 | class.Lentisphaeria.id.2250                  | Forced vital capacity (FVC), Best measure | nQHoYD | j7whlN | 0  | 0.826152585475658 0.512045627663948 0.727490783031059 0.563111103576266 0.188133324770009 0.881453233291237 0.871677031862393 0.403881547887175                                                                                                                                                                           | rs1002941 rs11770843 rs17114848 rs2031282 rs2825714 rs62570196 rs72640280 rs77599476                                                                                                 |

|     | A                                        | B                                         | C      | D      | E  | F                                                                                                                                                                                                                                                                                                                                                                     | G                                                                                                                                                                                                                   |
|-----|------------------------------------------|-------------------------------------------|--------|--------|----|-----------------------------------------------------------------------------------------------------------------------------------------------------------------------------------------------------------------------------------------------------------------------------------------------------------------------------------------------------------------------|---------------------------------------------------------------------------------------------------------------------------------------------------------------------------------------------------------------------|
| 312 | class.Mollicutes.id.3920                 | Forced vital capacity (FVC), Best measure | nRNBx9 | j7whlN | 0  | 0.610818654504468 0.173858234464187 0.672721821351023 0.254907107640134 0.560378605476859 0.728354120246213 0.520691441891406 0.428204561985953 0.504423914993625 0.624581570954579 0.994696599269785 0.366945387257129                                                                                                                                               | rs10108398 rs11890098 rs12566890 rs17214486 rs2464826 rs28537087 rs3768491 rs4885016 rs6043847 rs72901605 rs74603314 rs78169027                                                                                     |
| 313 | family.Bacteroidaceae.id.917             | Forced vital capacity (FVC), Best measure | O0n2Pz | j7whlN | 0  | 0.650620343346252 0.626908923558633 0.622381273607332 0.751673606989851 0.90863491405957 0.743193083612012 0.424021029684678 0.87653047573465 0.459887550848393                                                                                                                                                                                                       | rs11585893 rs13207588 rs1340391 rs17619981 rs2023437 rs66474973 rs66710942 rs6795673 rs9507307                                                                                                                      |
| 314 | family.Veillonellaceae.id.2172           | Forced vital capacity (FVC), Best measure | obtxsV | j7whlN | 0  | 0.610783010641103 0.613811499613722 0.430771529331863 0.834609067294733 0.653997410742628 0.805845002824448 0.566207333985826 0.74277556781354 0.59119069833274 0.770640480361459 0.732549978640375 0.564019629221093 0.782750261164753 0.396326145976098 0.484828023060452 0.633081659849586 0.768669454276578 0.649604176686508 0.720681399923861                   | rs111810795 rs114889439 rs11700976 rs12186441 rs12668619 rs12741784 rs1442060 rs1693340 rs2175069 rs2561116 rs2585520 rs4263802 rs4461038 rs4797169 rs61264131 rs6692542 rs6909981 rs79535861 rs9345168             |
| 315 | phylum.Bacteroidetes.id.905              | Forced vital capacity (FVC), Best measure | oChqj7 | j7whlN | 0  | 0.538942722479737 0.500987513064036 0.123371432503382 0.333127741927068 0.321127234578502 0.85587130691052 0.480978302011775 0.296309863466839 0.280367505313684                                                                                                                                                                                                      | rs111845179 rs2032750 rs62531359 rs6586324 rs73512608 rs73846128 rs73975615 rs7999780 rs929878                                                                                                                      |
| 316 | order.Coriobacteriales.id.810            | Forced vital capacity (FVC), Best measure | oGD8An | j7whlN | 0  | 0.646637456678828 0.463447426821852 0.705765764420859 0.512442017250737 0.658675266722998 0.525243797189079 0.733478683098149 0.798728508748402 0.209086316932271 0.488151863738188 0.947781710377297 0.757377121064375 0.58571961441836 0.293470969942099                                                                                                            | rs11073596 rs11250875 rs11656361 rs12974142 rs13307134 rs1397793 rs1816223 rs240104 rs2442778 rs3025411 rs34739816 rs67561917 rs719099 rs8010111                                                                    |
| 317 | genus.RuminococcaceaeUCG002.id.11360     | Forced vital capacity (FVC), Best measure | OhSZ6N | j7whlN | 0  | 0.710290684267627 0.741312517459473 0.488030515992562 0.554519752990368 0.514027287037718 0.754239634657993 0.396174359422892 0.556813339462523 0.950790497061676 0.548507044283932 0.529135423414524 0.433333994818809 0.591524420169729 0.845490519549816 0.830340113168185 0.539960222364941 0.621175773623721 0.5358947992309 0.665893531698851 0.526620324013272 | rs10916131 rs10927423 rs10964441 rs113147300 rs11607472 rs116974815 rs12463378 rs15256 rs55793120 rs56030423 rs57079348 rs6542556 rs6793778 rs7120052 rs7155595 rs7342369 rs76847269 rs77564310 rs79016051 rs882348 |
| 318 | genus..Eubacteriumnodatumgroup.id.11297  | Forced vital capacity (FVC), Best measure | oIDiSu | j7whlN | 0  | 0.724533436628666 0.917209699845271 0.362690853378816 0.569175695444882 0.540953965668622 0.402126529785047 0.56908421546225 0.470942906783137 0.53730553512843 0.590698572285899 0.135818707879754                                                                                                                                                                   | rs10263623 rs10458299 rs11006576 rs113893692 rs34297067 rs61841040 rs6818880 rs77910827 rs7827125 rs7880204 rs9425984                                                                                               |
| 319 | genus.Alloprevotella.id.961              | Forced vital capacity (FVC), Best measure | OtCSo3 | j7whlN | 0  | 0.664652843530906 0.829196727422276 0.910599469898853 0.802218931112392 0.275594457566032 0.790290542339061                                                                                                                                                                                                                                                           | rs12675596 rs2154444 rs34619204 rs4364940 rs4680035 rs58212166                                                                                                                                                      |
| 320 | family.Peptostreptococcaceae.id.2042     | Forced vital capacity (FVC), Best measure | oU56W6 | j7whlN | 0  | 0.991667057047237 0.224977117341474 0.85844593308047 0.494939680559328 0.839084605217946 0.876038187814177 0.828596333580725 0.934486649432542 0.88830974744006 0.871075932813634 0.965522230624327 0.975762859036999 0.864774416516755                                                                                                                               | rs117020988 rs12377846 rs12986312 rs1467258 rs1520207 rs4692811 rs59865771 rs59987323 rs61841503 rs6721459 rs76982728 rs77540684 rs9573937                                                                          |
| 321 | order.Clostridiales.id.1863              | Forced vital capacity (FVC), Best measure | Oxkiqb | j7whlN | 11 | 0.0224484312441121 0.0171135036360538 0.0361223193871873 0.0548263347544117 0.00305774016884265 0.0377185838700344 0.0183782410880904 0.0451472801809127 0.0575455179164 0.0291844273048037 0.0181884366478782 0.0114150117383489 0.0452566501672892                                                                                                                  | rs10774377 rs112334273 rs13105690 rs13179700 rs1842454 rs2273429 rs290772 rs6442336 rs6814436 rs6815608 rs72738886 rs72915163 rs76767978                                                                            |
| 322 | genus..Eubacteriumhalliigroup.id.11338   | Forced vital capacity (FVC), Best measure | P9709V | j7whlN | 0  | 0.495819500002075 0.646859743687374 0.770252127982899 0.55278899425706 0.632684389342936 0.459690436967075 0.428621437663248 0.585706759671142 0.491545689489948 0.378184364874672 0.676768359784832 0.885085314532053 0.807628058679645 0.588752766633578 0.429015624982498 0.346496400407291                                                                        | rs10501370 rs10798999 rs10808115 rs117748144 rs13116360 rs138531890 rs17074066 rs17474256 rs281379 rs28584818 rs60254196 rs630939 rs6550770 rs74018587 rs78056098 rs949971                                          |
| 323 | phylum.Cyanobacteria.id.1500             | Forced vital capacity (FVC), Best measure | PcT6eJ | j7whlN | 1  | 0.372898927388932 0.549941264550814 0.0362694957355173 0.419768075057991 0.282890436535916 0.3292698212171851 0.393978772241807 0.158909978591269                                                                                                                                                                                                                     | rs12555298 rs2585223 rs584122 rs61972390 rs7148504 rs76531781 rs789068 rs9864379                                                                                                                                    |
| 324 | genus.Phascolarctobacterium.id.2168      | Forced vital capacity (FVC), Best measure | pCXsP  | j7whlN | 0  | 0.788472898074935 0.926286555922795 0.871559901507381 0.8775286430594 0.749428187981787 0.872096345912896 0.941076475940209 0.707615377993485 0.874554626906288 0.503295435392848                                                                                                                                                                                     | rs11929846 rs12618201 rs1264476 rs28525131 rs56069061 rs56157888 rs74540770 rs74847270 rs75882962 rs7982713                                                                                                         |
| 325 | genus.LachnospiraceaeUCG008.id.11328     | Forced vital capacity (FVC), Best measure | PGIGHi | j7whlN | 0  | 0.829220520087135 0.444042967494135 0.477057418580346 0.677449682854435 0.591113703663027 0.397455197580512 0.654263627727427 0.761916911267259 0.756915671713473 0.928223473507091                                                                                                                                                                                   | rs10741777 rs10793103 rs10801803 rs13024781 rs57254474 rs61944774 rs62277846 rs67078837 rs75356640 rs955844                                                                                                         |
| 326 | family.Acidaminococcaceae.id.2166        | Forced vital capacity (FVC), Best measure | pXAgfu | j7whlN | 0  | 0.61711767434069 0.617067886561631 0.194591398451549 0.722863927154803 0.777532460111088 0.857774204086846 0.628950435458344                                                                                                                                                                                                                                          | rs262812 rs2933324 rs45497800 rs6589457 rs6923842 rs74540770 rs78702810                                                                                                                                             |
| 327 | genus.Lactobacillus.id.1837              | Forced vital capacity (FVC), Best measure | q1bO5E | j7whlN | 0  | 0.430016988538286 0.347089572862713 0.457724824931142 0.2030809433517 0.0988007626496257 0.0558353013591547 0.297519854787618                                                                                                                                                                                                                                         | rs11674854 rs16861661 rs62314653 rs75127669 rs768253 rs77478751 rs921925                                                                                                                                            |
| 328 | genus.Methanobrevibacter.id.123          | Forced vital capacity (FVC), Best measure | Q3dvBY | j7whlN | 0  | 0.81395215599312 0.889842880656893 0.125993049804703 0.349501031398003 0.731480516046329                                                                                                                                                                                                                                                                              | rs1334944 rs4802933 rs6776814 rs76029318 rs894996                                                                                                                                                                   |
| 329 | genus.Intestinibacter.id.11345           | Forced vital capacity (FVC), Best measure | Q46NVk | j7whlN | 0  | 0.254242220770245 0.241970948263136 0.203021046921857 0.287053172331233 0.358759212456656 0.264133033735219 0.220832712099162 0.552593225147168 0.363431189053961 0.0609732902392441 0.158894933181573 0.257349134035308 0.125655639015132 0.311501605886683                                                                                                          | rs11109097 rs118030283 rs16938435 rs2098844 rs2702387 rs4327025 rs447950 rs478972 rs6062862 rs62430350 rs68093214 rs6875660 rs893394 rs9348442                                                                      |
| 330 | genus..Ruminococcustorquesgroup.id.14377 | Forced vital capacity (FVC), Best measure | qE3Gq8 | j7whlN | 2  | 0.0474026888103597 0.0443877423872027 0.0593424863157488 0.166571478405647 0.175646019928922 0.175273470731036 0.125405234446657 0.149102606985566 0.192074357034394                                                                                                                                                                                                  | rs10904297 rs10967781 rs12434631 rs1475330 rs35866622 rs4073731 rs77034621 rs8080469 rs8141465                                                                                                                      |



|     | A                                            | B                                         | C      | D      | E | F                                                                                                                                                                                                                                                                          | G                                                                                                                                                             |
|-----|----------------------------------------------|-------------------------------------------|--------|--------|---|----------------------------------------------------------------------------------------------------------------------------------------------------------------------------------------------------------------------------------------------------------------------------|---------------------------------------------------------------------------------------------------------------------------------------------------------------|
| 351 | genus.ChristensenellaceaeR.7group.id.11283   | Forced vital capacity (FVC), Best measure | tbXTaX | j7whIN | 0 | 0.833062619282644 0.896056693593367 0.616845724869724 0.414774847913774 0.849073636019598 0.972805891634383 0.82359745260232 0.91756077862973 0.760845908402384 0.696754784361755                                                                                          | rs10461257 rs17081797 rs60954665 rs62132810 rs62190261 rs62467127 rs73952017 rs78521377 rs79150079 rs892686                                                   |
| 352 | genus..Eubacteriumfissicatenaagroup.id.14373 | Forced vital capacity (FVC), Best measure | TGrzdF | j7whIN | 1 | 0.639273033941636 0.504586505899687 0.428157105487854 0.461329353848518 0.602305460039459 0.756926298197291 0.653438772826773 0.00653635404062642                                                                                                                          | rs11818408 rs11876297 rs151257695 rs1768152 rs2733072 rs3771393 rs6934739 rs7104872                                                                           |
| 353 | genus.Slackia.id.825                         | Forced vital capacity (FVC), Best measure | tkl5vG | j7whIN | 0 | 0.908609844876517 0.394027205362811 0.964065589037327 0.478797465321443 0.661847325144847 0.885025578513783                                                                                                                                                                | rs10409783 rs12440440 rs16894137 rs35156985 rs4492265 rs8901                                                                                                  |
| 354 | genus.RuminococcaceaeUCG004.id.11362         | Forced vital capacity (FVC), Best measure | TlODZI | j7whIN | 0 | 0.559994720041207 0.878370551134819 0.299968055608952 0.859291863634495 0.971017068866687 0.715831984731932 0.923265286043064 0.900355776980382 0.82757271529769                                                                                                           | rs10976229 rs11961899 rs12125734 rs2248146 rs3800154 rs511258 rs6769553 rs7569771 rs9818949                                                                   |
| 355 | genus.LachnospiraceaeUCG004.id.11324         | Forced vital capacity (FVC), Best measure | TQSPiB | j7whIN | 0 | 0.625331213241896 0.726650387099466 0.875032541544679 0.933444839993081 0.684754600672269 0.701238210472824 0.728594837508443 0.923251230210377 0.938444966147514 0.594274816786381 0.798494407941655                                                                      | rs11128180 rs12072562 rs12673420 rs12747809 rs12894272 rs233486 rs2726805 rs2882478 rs35182105 rs6656451 rs7629954                                            |
| 356 | order.Bacteroidales.id.913                   | Forced vital capacity (FVC), Best measure | tSliO9 | j7whIN | 0 | 0.322575403250346 0.290499128306956 0.268317921653435 0.301608626462122 0.0678416121132557 0.16230456031189 0.058070219142316 0.260417692573074 0.423509753692748 0.195473374365143 0.137883655844504                                                                      | rs11146701 rs111845179 rs2032750 rs4146051 rs4916508 rs55773148 rs62531359 rs73975615 rs7631304 rs79585701 rs929878                                           |
| 357 | genus.LachnospiraceaeNC2004group.id.11316    | Forced vital capacity (FVC), Best measure | TUj4LC | j7whIN | 0 | 0.413897743164253 0.735925540648266 0.894056937552429 0.236058723819263 0.475104134438027 0.232965032782986 0.649881390364806 0.363982834853539 0.681592297965548                                                                                                          | rs117467633 rs12127733 rs12208226 rs12863463 rs17067076 rs1928659 rs1929743 rs3756315 rs6116753                                                               |
| 358 | order.Bacillales.id.1674                     | Forced vital capacity (FVC), Best measure | uCOF7P | j7whIN | 0 | 0.139601001922679 0.0642510164921422 0.157539880337736 0.306163254464148 0.0832715509637591 0.13302584311409 0.201668597127643 0.345979436385151                                                                                                                           | rs10410917 rs11034576 rs11207728 rs11844714 rs1287018 rs4617108 rs62640857 rs74420793                                                                         |
| 359 | genus.Akkermansia.id.4037                    | Forced vital capacity (FVC), Best measure | uHEy8Q | j7whIN | 0 | 0.268503386688636 0.301571705392978 0.50920619642961 0.127893023651451 0.315487704897734 0.441054025687434 0.366282800171282 0.200885772984857 0.766451914452432 0.4361293002724 0.327073437779542                                                                         | rs111862613 rs117107102 rs11729256 rs12908520 rs2602429 rs4242783 rs4936098 rs61779207 rs74542928 rs9349825 rs941682                                          |
| 360 | genus.Parabacteroides.id.954                 | Forced vital capacity (FVC), Best measure | uQYGEB | j7whIN | 0 | 0.173975781128631 0.912840505657215 0.493049245901876 0.632087387757833 0.972287382420693 0.916639629067849                                                                                                                                                                | rs114567323 rs115602804 rs4236095 rs60884758 rs6657302 rs7298818                                                                                              |
| 361 | class.Verrucomicrobiae.id.4029               | Forced vital capacity (FVC), Best measure | UsMxlz | j7whIN | 0 | 0.269671514315601 0.302182328870512 0.510091229299547 0.128018731827206 0.316116743498683 0.442557844579374 0.367101265607073 0.201873356205701 0.764859291034108 0.437141816128285 0.327924431867666                                                                      | rs111862613 rs117107102 rs11729256 rs12908520 rs2602429 rs4242783 rs4936098 rs61779207 rs74542928 rs9349825 rs941682                                          |
| 362 | class.Bacteroidia.id.912                     | Forced vital capacity (FVC), Best measure | UTPK2n | j7whIN | 0 | 0.322575403250346 0.290499128306956 0.268317921653435 0.301608626462122 0.0678416121132557 0.16230456031189 0.058070219142316 0.260417692573074 0.423509753692748 0.195473374365143 0.137883655844504                                                                      | rs11146701 rs111845179 rs2032750 rs4146051 rs4916508 rs55773148 rs62531359 rs73975615 rs7631304 rs79585701 rs929878                                           |
| 363 | genus.Butyrivibrio.id.1993                   | Forced vital capacity (FVC), Best measure | UYJxH8 | j7whIN | 0 | 0.386439602854046 0.688033124081993 0.460210023066393 0.134934227500221 0.449490629780487 0.668355527569646 0.38599195368672 0.288471068764736 0.407181996208676 0.2578538880271 0.524770568295332 0.424642360076532 0.402766473051069 0.365528047160341 0.226703967885832 | rs1007475 rs11761679 rs142855850 rs16934069 rs16941336 rs17163238 rs4537857 rs486484 rs4928024 rs72723662 rs74622183 rs77356209 rs7752361 rs7763512 rs9349693 |
| 364 | genus.Bacteroides.id.918                     | Forced vital capacity (FVC), Best measure | Vd8Fsi | j7whIN | 0 | 0.650620343346252 0.626908923558633 0.622381273607332 0.751673606989851 0.90863491405957 0.743193083612012 0.424021029684678 0.87653047573465 0.459887550848393                                                                                                            | rs11585893 rs13207588 rs1340391 rs17619981 rs2023437 rs66474973 rs66710942 rs6795673 rs9507307                                                                |
| 365 | family.Ruminococcaceae.id.2050               | Forced vital capacity (FVC), Best measure | vlyGOP | j7whIN | 0 | 0.324032400372704 0.613759072700529 0.220793078043295 0.64176191228245 0.656264089500052 0.44151010260859 0.711515287766112 0.945982715394263 0.390075940994469 0.700384807600777                                                                                          | rs10093275 rs10166469 rs1158100 rs1612733 rs17376049 rs2113833 rs3009418 rs55793120 rs56199908 rs76724913                                                     |
| 366 | genus.Olsenella.id.822                       | Forced vital capacity (FVC), Best measure | W49loY | j7whIN | 0 | 0.63201464030593 0.330583630273843 0.56387709426113 0.512627171597973 0.324163407265329 0.530457504361007 0.846439167789764 0.379499338354654 0.338493930319363 0.523893186823004 0.395719498853565                                                                        | rs1035588 rs17148768 rs2759329 rs35225860 rs6046522 rs61090148 rs62112538 rs72691585 rs7540303 rs8066522 rs9460691                                            |
| 367 | genus.Romboutsia.id.11347                    | Forced vital capacity (FVC), Best measure | w5yhuV | j7whIN | 0 | 0.923239249084213 0.768410420911344 0.871909164437349 0.898527714875086 0.67831980681737 0.747618222557871 0.70990022656003 0.771338914106598 0.978055097935457 0.897667368613182 0.811379604948013 0.907430315916645 0.654155355465493                                    | rs10279978 rs11221428 rs16843578 rs28603357 rs34302036 rs61841503 rs62504452 rs7109293 rs75200530 rs75987356 rs77702691 rs9389266 rs9567264                   |
| 368 | genus.Desulfovibrio.id.3173                  | Forced vital capacity (FVC), Best measure | WaNFee | j7whIN | 0 | 0.658983273652529 0.419468896559352 0.548543505347297 0.323630617347339 0.89532165874289 0.806283270876143 0.503456959952057 0.293537312752401 0.671980946190437 0.936173253923224                                                                                         | rs12031543 rs13066142 rs16863365 rs2032031 rs2590913 rs2853179 rs4797774 rs6580353 rs72647089 rs7729080                                                       |
| 369 | genus.Anaerofilum.id.2053                    | Forced vital capacity (FVC), Best measure | Wct5pC | j7whIN | 0 | 0.9304680442641 0.977507737268521 0.913485556558347 0.782027986131027 0.845481229657321 0.643831260810709 0.812117610482575 0.743774651484526 0.297614804509848 0.787213096842603 0.91820431502678                                                                         | rs10794359 rs1563175 rs17012738 rs17096874 rs356049 rs4244069 rs4506496 rs712981 rs79598899 rs816292 rs9299345                                                |
| 370 | family.Alcaligenaceae.id.2875                | Forced vital capacity (FVC), Best measure | WEMGli | j7whIN | 0 | 0.205533990717489 0.26161485067363 0.250816866118198 0.0958816422656269 0.469262820112535 0.444837665034249 0.217088315560879 0.583732253538814 0.217233888250861 0.301666584136074                                                                                        | rs112135816 rs1153990 rs147968 rs28480294 rs4033856 rs62395635 rs6969323 rs7638039 rs9537886 rs9964679                                                        |
| 371 | genus.Marvinbryantia.id.2005                 | Forced vital capacity (FVC), Best measure | wFbL6j | j7whIN | 1 | 0.259080404040046 0.181829977751927 0.134501349519115 0.29890328898776 0.227545227902715 0.250066504588038 0.104985910776619 0.180312943224191 0.0061085380261631 0.239345698941337                                                                                        | rs11620597 rs1187983 rs146541147 rs2724813 rs2842896 rs2863363 rs3125832 rs61884471 rs72948274 rs8006832                                                      |

|     | A                                         | B                                         | C       | D       | E  | F                                                                                                                                                                                                                                                                                                                                 | G                                                                                                                                                                                 |
|-----|-------------------------------------------|-------------------------------------------|---------|---------|----|-----------------------------------------------------------------------------------------------------------------------------------------------------------------------------------------------------------------------------------------------------------------------------------------------------------------------------------|-----------------------------------------------------------------------------------------------------------------------------------------------------------------------------------|
| 372 | genus.LachnospiraceaeUCG001.id.11321      | Forced vital capacity (FVC), Best measure | wlF1Yn  | j7whlIN | 1  | 0.447079269714312 0.524118895842681 0.3951883198627 0.608113297273325 0.334988617692473 0.234758800189325 0.329877457989229 0.0416878446980709 0.365978742395879 0.442794934085143 0.244982044247273 0.211744975748083 0.369451263777153                                                                                          | rs12131224 rs2050911 rs2371284 rs437876 rs4981345 rs573933 rs62496417 rs7341608 rs74034332 rs78848836 rs8104225 rs9403580 rs985416                                                |
| 373 | genus.Veillonella.id.2198                 | Forced vital capacity (FVC), Best measure | wlFco0  | j7whlIN | 1  | 0.111181909828462 0.130647233732535 0.0941784332392437 0.0797597140449274 0.139406560321405 0.133624706202807 0.100027683374523 0.00405428710938173                                                                                                                                                                               | rs11141494 rs1882878 rs2013594 rs55807413 rs62376424 rs6656807 rs7359080 rs742016                                                                                                 |
| 374 | genus.ErysipelotrichaceaeUCG003.id.11384  | Forced vital capacity (FVC), Best measure | wn5rK2  | j7whlIN | 0  | 0.592552858066355 0.763331659471327 0.764263743909855 0.436208988919489 0.718780212661697 0.764753857338515 0.957855972555171 0.826107318119029 0.499090808804712 0.455130655933455 0.979488226042648 0.594475040524503 0.626742679441259 0.577889818815503 0.524162305414515 0.526638458397625                                   | rs10164067 rs11666127 rs11994308 rs12251396 rs17798136 rs28568391 rs4758231 rs59068084 rs59104037 rs62403464 rs6875357 rs73074432 rs74988980 rs75949021 rs76502207 rs8053479      |
| 375 | genus.Odoribacter.id.952                  | Forced vital capacity (FVC), Best measure | wQYhwp  | j7whlIN | 0  | 0.833367945647778 0.268104722005146 0.701062949409532 0.647524993878842 0.843338656211585 0.984868781826656 0.429168448139394                                                                                                                                                                                                     | rs10093869 rs10423795 rs28417404 rs4793970 rs6856150 rs74553962 rs77779484                                                                                                        |
| 376 | genus..Eubacteriumeligensgroup.id.14372   | Forced vital capacity (FVC), Best measure | WvdQyb  | j7whlIN | 0  | 0.977012345529758 0.606516132518255 0.945041011893987 0.2895828693299 0.422913638621166 0.778369846416134 0.725454859720818                                                                                                                                                                                                       | rs12719051 rs182318 rs2200429 rs265534 rs4583233 rs56080211 rs6923695                                                                                                             |
| 377 | class.Betaproteobacteria.id.2867          | Forced vital capacity (FVC), Best measure | X4kHrP  | j7whlIN | 1  | 0.452285664924015 0.271178714097487 0.416444091913043 0.235786286533121 0.177326864552935 0.228911819660283 0.390030253021522 0.179793693955386 0.0321373102071918 0.366663010510825 0.18684170430595 0.259764696513452                                                                                                           | rs11128180 rs1511453 rs1928341 rs2321387 rs2613606 rs320161 rs4033856 rs56386628 rs6087811 rs62395635 rs75242906 rs9964679                                                        |
| 378 | genus.Dialister.id.2183                   | Forced vital capacity (FVC), Best measure | xCuklr  | j7whlIN | 0  | 0.177208830637494 0.593396442615242 0.586383367046612 0.544937376555609 0.323997121404524 0.873478695071932 0.395934636379859 0.371279301894395 0.276984539998579 0.518481382421136                                                                                                                                               | rs10138457 rs10938938 rs11071887 rs11166701 rs2314294 rs4747450 rs4753063 rs75416973 rs764177 rs76680460                                                                          |
| 379 | family.Pasteurellaceae.id.3689            | Forced vital capacity (FVC), Best measure | Xtkjtja | j7whlIN | 1  | 0.129926389105734 0.0705329766638867 0.207305626276765 0.135685345315767 0.150022600212235 0.0257344304386598 0.169958439926038 0.178501881318541 0.262920006625517 0.274121714201808 0.0731465551048839 0.0726055439825033 0.101670972016684 0.129640691615463                                                                   | rs10965428 rs111582866 rs12050685 rs16970009 rs35510 rs4822728 rs6972479 rs72756943 rs73139353 rs76022354 rs78909003 rs9382510 rs9895850 rs9938097                                |
| 380 | genus.Intestinimonas.id.2062              | Forced vital capacity (FVC), Best measure | XTu0EY  | j7whlIN | 0  | 0.859307407396841 0.63392107221895 0.978751052436008 0.885255313151094 0.973512261925127 0.921437722810666 0.761118832442727 0.90699888892949 0.453093716606248 0.746043891269293 0.854591398303991 0.791409063917116 0.753757504664112 0.673357922658685 0.892024757212624 0.887302392205137                                     | rs10262702 rs11258178 rs12226153 rs17067892 rs1859797 rs2276760 rs2731794 rs2930225 rs4113676 rs4784055 rs62240188 rs62427239 rs6934519 rs716604 rs7170984 rs9823439              |
| 381 | genus.Holdemania.id.2157                  | Forced vital capacity (FVC), Best measure | XVFzMF  | j7whlIN | 0  | 0.781794610453124 0.571671457473014 0.262383695217112 0.470676266389905 0.5820242207937 0.673655681598184 0.660839121859127 0.908646085167319 0.707428538301101 0.793300106616443 0.37133597292646 0.457075065609777 0.622313602400528 0.383868829831355                                                                          | rs10885477 rs11080063 rs111745969 rs113593397 rs116500994 rs12701617 rs1867876 rs4146507 rs6133067 rs73139538 rs80149660 rs9500080 rs9529719 rs967319                             |
| 382 | genus.LachnospiraceaeND3007group.id.11317 | Forced vital capacity (FVC), Best measure | y0FJ9U  | j7whlIN | 1  | 0.927177216607622 0.0198967317869461 0.706401754835951                                                                                                                                                                                                                                                                            | rs2861203 rs72776675 rs9932954                                                                                                                                                    |
| 383 | family.Methanobacteriaceae.id.121         | Forced vital capacity (FVC), Best measure | Y7cF3n  | j7whlIN | 0  | 0.640612012509955 0.599296583720763 0.410522556143889 0.207641390180512 0.746419741482467 0.645152599184827 0.5296447358175 0.250255283470213                                                                                                                                                                                     | rs10424197 rs4257531 rs56131665 rs6508769 rs6776814 rs73068003 rs73457410 rs894996                                                                                                |
| 384 | genus.Butyricoccus.id.2055                | Forced vital capacity (FVC), Best measure | yakWtY  | j7whlIN | 0  | 0.236706465037559 0.161065553371943 0.883829146850597 0.51047013160899 0.573567093184227 0.678795235208689 0.861715099649153 0.661563493193885                                                                                                                                                                                    | rs10084203 rs12034718 rs12585793 rs2017189 rs4962426 rs56221232 rs62478070 rs7322368                                                                                              |
| 385 | genus.RuminococcaceaeUCG005.id.11363      | Forced vital capacity (FVC), Best measure | yerlNC  | j7whlIN | 0  | 0.530737777749362 0.194134441613168 0.30706889713288 0.3644086771332 0.599983559391631 0.489067198660668 0.337272968326459 0.249613425043299 0.61414649905181 0.276200358864491 0.350799190634553 0.422882521081374 0.212145126544508 0.391763374636128                                                                           | rs10873449 rs10937802 rs10950694 rs114279581 rs12288512 rs12458218 rs2893871 rs34781347 rs55793120 rs72776570 rs7449320 rs7555878 rs7586445 rs898577                              |
| 386 | family.Erysipelotrichaceae.id.2149        | Forced vital capacity (FVC), Best measure | yfxlv6  | j7whlIN | 13 | 0.0190864436033762 0.0204278319561581 0.00514379561895584 0.0128975748833661 0.044025440517228 0.0267144363472665 0.0238533488661673 0.00295744485160947 0.019745934461714 0.006968502923956 0.0159003614145526 0.0146194089731121 0.0268884917550883                                                                             | rs1074800 rs10781552 rs17530232 rs1884466 rs2300774 rs290833 rs35161940 rs4078432 rs56970041 rs62504403 rs7234058 rs7826267 rs8003149                                             |
| 387 | genus.Fusicatenibacter.id.11305           | Forced vital capacity (FVC), Best measure | ygbSF7  | j7whlIN | 0  | 0.620141957840173 0.455821003928416 0.560679426913151 0.433190060312969 0.635818453749928 0.49978233257319 0.389439098635342 0.312215434780583 0.436444135490038 0.826952771550582 0.711937490283256 0.353915742200652 0.54237037246978 0.940721979401009 0.541571680027381 0.378978244847977 0.551269468259678 0.518589835333908 | rs10439674 rs167879 rs1864685 rs2025938 rs206581 rs2132128 rs3303 rs4378146 rs60254196 rs62187631 rs62353480 rs6515626 rs704418 rs73103914 rs792108 rs8028026 rs8063430 rs9905659 |
| 388 | family.FamilyXIII.id.1957                 | Forced vital capacity (FVC), Best measure | ylev3A  | j7whlIN | 0  | 0.419447838850698 0.54530325347284 0.23249646574728 0.816462544141592 0.843744231923791 0.608578197078024 0.465672215643704 0.478320902873438 0.858253170781328 0.402879000118617                                                                                                                                                 | rs10404377 rs118170811 rs12904405 rs1887048 rs3098182 rs482905 rs6501525 rs66753613 rs6797051 rs7514702                                                                           |
| 389 | genus.Senegalimassilia.id.11160           | Forced vital capacity (FVC), Best measure | yLt27i  | j7whlIN | 1  | 0.0824592618875284 0.160608479186683 0.0455431184565548 0.0633589185169222 0.0910340899182992                                                                                                                                                                                                                                     | rs10036909 rs11787826 rs1990708 rs2017373 rs7225245                                                                                                                               |
| 390 | genus.Alistipes.id.968                    | Forced vital capacity (FVC), Best measure | YXZeGZ  | j7whlIN | 0  | 0.622537859820152 0.329279633480678 0.437806630329446 0.977796986142479 0.580567142536534 0.378918528515339 0.375877257879308 0.391601821131664 0.326137327814931 0.329690652440874 0.288594928946573 0.586415715606359 0.430880797041119 0.488298698725812                                                                       | rs1107244 rs11769002 rs11958296 rs12990744 rs1689282 rs2290844 rs2450745 rs2875322 rs34417064 rs4810359 rs62576416 rs67705352 rs7129639 rs8130320                                 |

|     | A                                      | B                                                                 | C      | D      | E  | F                                                                                                                                                                                                                                                                                              | G                                                                                                                                                                     |
|-----|----------------------------------------|-------------------------------------------------------------------|--------|--------|----|------------------------------------------------------------------------------------------------------------------------------------------------------------------------------------------------------------------------------------------------------------------------------------------------|-----------------------------------------------------------------------------------------------------------------------------------------------------------------------|
| 391 | genus.Gordonibacter.id.821             | Forced vital capacity (FVC), Best measure                         | YYHfMs | j7whlN | 2  | 0.112133954825116 0.179896864070747 0.137272522978923 0.045311511175447 0.0593001507622284 0.142552042347405 0.0208266488282137 0.0897603669119762 0.1384440902563 0.0534011180250872 0.17337421415398                                                                                         | rs13412653 rs16955299 rs322296 rs35042269 rs3765837 rs4596722 rs71545975 rs72714787 rs72939513 rs7294633 rs768830                                                     |
| 392 | genus.Oscillospira.id.2064             | Forced vital capacity (FVC), Best measure                         | zaZf8A | j7whlN | 1  | 0.0386321065524186 0.398889281685179 0.149447215745154 0.078003102335816 0.0810243059583141 0.264546427475883 0.103367013009221 0.194232470583629                                                                                                                                              | rs12206468 rs12925026 rs1954532 rs28889936 rs62422654 rs72866977 rs751183 rs8076323                                                                                   |
| 393 | class.Erysipelotrichia.id.2147         | Forced vital capacity (FVC), Best measure                         | ZJXDpG | j7whlN | 13 | 0.0190864436033762 0.0204278319561581 0.00514379561895584 0.0128975748833661 0.044025440517228 0.0267144363472665 0.0238533488661673 0.00295744485160947 0.019745934461714 0.006968502923956 0.0159003614145526 0.0146194089731121 0.0268884917550883                                          | rs1074800 rs10781552 rs17530232 rs1884466 rs2300774 rs290833 rs35161940 rs4078432 rs56970041 rs62504403 rs7234058 rs7826267 rs8003149                                 |
| 394 | genus.Allisonella.id.2174              | Forced vital capacity (FVC), Best measure                         | zkWLyI | j7whlN | 0  | 0.207808363435421 0.144776995630465 0.436139702759697 0.440232459220621 0.101030809376861 0.58811575403997 0.272179446966238 0.362515003252508                                                                                                                                                 | rs1901739 rs35110698 rs35778461 rs594561 rs602075 rs6742198 rs76904847 rs7898615                                                                                      |
| 395 | genus.Eggerthella.id.819               | Forced expiratory volume in 1-second (FEV1), predicted percentage | 0aMbT3 | QoRiKP | 0  | 0.293502859602721 0.747276302205348 0.813542322322167 0.452391455449365 0.699270707550705 0.758704765853266 0.775928398455731 0.935351485343328 0.86075250765449 0.959865496779512 0.367066467606244                                                                                           | rs112205261 rs13070736 rs1784446 rs2223081 rs2240838 rs2877457 rs3851328 rs4985746 rs6430926 rs67490567 rs76663501                                                    |
| 396 | genus.Lactococcus.id.1851              | Forced expiratory volume in 1-second (FEV1), predicted percentage | 0heWA4 | QoRiKP | 1  | 0.207851448900287 0.166940972118847 0.159874651129781 0.155220728895094 0.00129139132038233 0.243503240712043 0.215167037298111 0.0950155067849222 0.280225309247192                                                                                                                           | rs10417872 rs123059 rs12621813 rs17168302 rs2293361 rs4766997 rs55910161 rs6674304 rs7992246                                                                          |
| 397 | genus.DefluviitaleaceaeUCG011.id.11287 | Forced expiratory volume in 1-second (FEV1), predicted percentage | 0lsDJy | QoRiKP | 0  | 0.571963813217154 0.983701846361564 0.445075058019933 0.945421476138146 0.861377636412743 0.889268870766785 0.697204989588764 0.792886436004346 0.992448018721574                                                                                                                              | rs112893842 rs1582238 rs2892880 rs4344384 rs4677103 rs55658617 rs72731813 rs9608282 rs9725395                                                                         |
| 398 | genus.Flavonifractor.id.2059           | Forced expiratory volume in 1-second (FEV1), predicted percentage | 0ngO8p | QoRiKP | 0  | 0.923995574558513 0.826608012191643 0.660485749310292 0.981871169972968 0.0729794376054734                                                                                                                                                                                                     | rs114873521 rs11811696 rs12030302 rs34066017 rs806808                                                                                                                 |
| 399 | genus.Lachnospira.id.2004              | Forced expiratory volume in 1-second (FEV1), predicted percentage | 0rTnk2 | QoRiKP | 0  | 0.242925032889971 0.751429063735643 0.889138498437476 0.664938490647889 0.646850484049929 0.770096394968962                                                                                                                                                                                    | rs13157098 rs159484 rs2520509 rs4686798 rs4923324 rs56791201                                                                                                          |
| 400 | phylum.Firmicutes.id.1672              | Forced expiratory volume in 1-second (FEV1), predicted percentage | 0rWmph | QoRiKP | 0  | 0.519569919911686 0.981340545752592 0.818414310183452 0.938507948572652 0.987358333882639 0.583225273126042 0.625439780819815 0.765164427242693 0.812796772599295 0.410481283844535 0.413357175695251 0.717447550683834 0.638600215702526 0.689195862191319 0.97773373089115 0.722351515404685 | rs112334273 rs2009919 rs2273429 rs2332027 rs2547978 rs36111799 rs3792064 rs3852931 rs4750583 rs56199908 rs6814436 rs6815608 rs7247191 rs72738886 rs72771021 rs8085381 |
| 401 | genus.Hungatella.id.11306              | Forced expiratory volume in 1-second (FEV1), predicted percentage | 0Vfsi1 | QoRiKP | 0  | 0.696154673903928 0.171215481714187 0.466177283624026 0.658446227376022 0.194859958895905                                                                                                                                                                                                      | rs10044993 rs13128780 rs13249325 rs17092615 rs72759041                                                                                                                |
| 402 | genus.FamilyXIIICUG001.id.11294        | Forced expiratory volume in 1-second (FEV1), predicted percentage | 1rpkul | QoRiKP | 0  | 0.505979629946612 0.421506665231277 0.62899526369877 0.658835093419468 0.81904375410573 0.36539895942586 0.368594260826133 0.33273712500635                                                                                                                                                    | rs112362903 rs12049454 rs1426266 rs3842897 rs62414802 rs7119679 rs76463770 rs8076666                                                                                  |
| 403 | genus.Escherichia.Shigella.id.3504     | Forced expiratory volume in 1-second (FEV1), predicted percentage | 1uqUdL | QoRiKP | 3  | 0.1414408810278 0.0443984362803167 0.15769811356785 0.132953741915079 0.0557321022375888 0.0439421899822343 0.129904595022795 0.0057471858012536 0.0775778369178623 0.143712686293787                                                                                                          | rs112767262 rs113127095 rs113513883 rs1154904 rs118526 rs2798105 rs4731451 rs57024273 rs592299 rs73208162                                                             |
| 404 | family.Streptococcaceae.id.1850        | Forced expiratory volume in 1-second (FEV1), predicted percentage | 1zf0TZ | QoRiKP | 0  | 0.845033663209796 0.603973187006134 0.377956189069333 0.459785451907043 0.25090322567218 0.53067332292874 0.492138945248302 0.285602373139131 0.570588767530436 0.671742698258919 0.784038010603526 0.832234853178598                                                                          | rs10028567 rs11110281 rs2370083 rs35344081 rs4968759 rs57646748 rs6806351 rs72739637 rs77968078 rs7916711 rs957755 rs9903102                                          |
| 405 | genus.Holdemanella.id.11393            | Forced expiratory volume in 1-second (FEV1), predicted percentage | 20HLOT | QoRiKP | 0  | 0.321098455681321 0.883343257088309 0.389883855865772 0.333189931494657 0.112295142259816 0.357128465230106 0.390263809087493 0.210048265689267 0.434425781471273 0.507787768338679 0.388995488837926                                                                                          | rs12513188 rs17586763 rs1926302 rs34187114 rs35228298 rs4541991 rs607782 rs62113381 rs73011279 rs75764681 rs8113760                                                   |
| 406 | genus.Ruminococcus2.id.11374           | Forced expiratory volume in 1-second (FEV1), predicted percentage | 2GJP3o | QoRiKP | 0  | 0.44376380760281 0.478614070822061 0.21784636409446 0.257240977528329 0.61177170818607 0.39969866376744 0.454672878394079 0.403298943167043 0.587649672038711 0.557401185528417 0.686189189780422 0.39708185812851 0.419024368975594 0.164142865121154                                         | rs12406309 rs12986628 rs1819812 rs2368224 rs2846589 rs2997412 rs4400279 rs4799823 rs55707116 rs58681734 rs61791565 rs7635831 rs7693984 rs78120384                     |
| 407 | phylum.Euryarchaeota.id.55             | Forced expiratory volume in 1-second (FEV1), predicted percentage | 2neTKK | QoRiKP | 0  | 0.307626927621674 0.284354238723652 0.140167240555584 0.29527671904738 0.244503361146928 0.262638851666003 0.0953588735142156 0.244599649131545 0.220798693148247 0.24708938135868 0.160203185167804                                                                                           | rs11022995 rs34928225 rs45498998 rs56131665 rs6064552 rs6508769 rs7015093 rs76029318 rs7635189 rs77658038 rs894996                                                    |

|     | A                                           | B                                                                 | C      | D      | E | F                                                                                                                                                                                                                                                                                                                                    | G                                                                                                                                                                                         |
|-----|---------------------------------------------|-------------------------------------------------------------------|--------|--------|---|--------------------------------------------------------------------------------------------------------------------------------------------------------------------------------------------------------------------------------------------------------------------------------------------------------------------------------------|-------------------------------------------------------------------------------------------------------------------------------------------------------------------------------------------|
| 408 | genus.Coproccoccus2.id.11302                | Forced expiratory volume in 1-second (FEV1), predicted percentage | 2vslhf | QoRiKP | 0 | 0.0934859539127039 0.678390736144095 0.379252828686128 0.57491591598889 0.644333105281778 0.456925881159754 0.494315268634037 0.778927214913424                                                                                                                                                                                      | rs10070053 rs12634070 rs2482516 rs35890118 rs61823518 rs6677933 rs72680320 rs9426473                                                                                                      |
| 409 | family.Christensenellaceae.id.1866          | Forced expiratory volume in 1-second (FEV1), predicted percentage | 31r1VV | QoRiKP | 0 | 0.619145377723644 0.953034161296426 0.7615569363812 0.896714504752308 0.35653699515884 0.832988092664497 0.692625006305599 0.592526073181888 0.779177645866372 0.969541196991548 0.666063119701806                                                                                                                                   | rs117186816 rs12380890 rs12657403 rs4076564 rs62573205 rs7211194 rs72706624 rs77867022 rs870002 rs892686 rs9608766                                                                        |
| 410 | genus..Eubacteriumrectalegroup.id.14374     | Forced expiratory volume in 1-second (FEV1), predicted percentage | 37ZEpl | QoRiKP | 0 | 0.383084848562885 0.361931827613022 0.794394484791158 0.656795615353275 0.44939230536814 0.414318331496915 0.377578211224141 0.558813456342308                                                                                                                                                                                       | rs10248854 rs10797540 rs143694765 rs2884897 rs314726 rs35398954 rs59427698 rs62547233                                                                                                     |
| 411 | class.Actinobacteria.id.419                 | Forced expiratory volume in 1-second (FEV1), predicted percentage | 3cOJ1f | QoRiKP | 0 | 0.765453924078748 0.924387458452172 0.478036306489887 0.858343591502529 0.955110083139775 0.958713582290208 0.787482224102339 0.971794658376495 0.838067001202768 0.770198044595893 0.547261523293261 0.856867942505073 0.858302744846429                                                                                            | rs11655079 rs11745923 rs12049045 rs134366 rs1376754 rs1515761 rs4945008 rs6660520 rs72767435 rs80083040 rs8047955 rs857444 rs961091                                                       |
| 412 | class.Methanobacteria.id.119                | Forced expiratory volume in 1-second (FEV1), predicted percentage | 3Oo7Td | QoRiKP | 0 | 0.635151424543404 0.311568884883246 0.774634806315217 0.821878372278675 0.907553008559156 0.965311004993295 0.93324360363905 0.990448313468905                                                                                                                                                                                       | rs10424197 rs4257531 rs56131665 rs6508769 rs6776814 rs73068003 rs73457410 rs894996                                                                                                        |
| 413 | genus.Subdoligranulum.id.2070               | Forced expiratory volume in 1-second (FEV1), predicted percentage | 3tgfXE | QoRiKP | 0 | 0.582357165750903 0.603308088241007 0.804814604778391 0.966440129648001 0.623747909554135 0.510050707068073 0.828432838819164 0.782103544820806 0.705542106003314 0.867015180008838                                                                                                                                                  | rs10065321 rs10497836 rs1667315 rs2114677 rs2171249 rs35940633 rs4347804 rs6555306 rs75158211 rs76528319                                                                                  |
| 414 | genus.Bilophila.id.3170                     | Forced expiratory volume in 1-second (FEV1), predicted percentage | 4zBtt2 | QoRiKP | 0 | 0.231885358699969 0.355171634685869 0.296123268727193 0.242176282677077 0.0786754553233235 0.521238674023768 0.609889918224158 0.382740798069448 0.671271476178631 0.427029799499492 0.478801877612494 0.463178364761178                                                                                                             | rs11069458 rs1241171 rs1571225 rs1969927 rs3827020 rs4798126 rs542415 rs60178956 rs6793291 rs72676854 rs7802841 rs9899990                                                                 |
| 415 | genus.RuminococcaceaeUCG014.id.11371        | Forced expiratory volume in 1-second (FEV1), predicted percentage | 5lXuob | QoRiKP | 0 | 0.977602629117172 0.833197032509145 0.940576029376078 0.667126958176428 0.801478538591668 0.29193140258279 0.792077544082778 0.981175629020685 0.705677490655142 0.445258615972303 0.856552279744204                                                                                                                                 | rs10495392 rs10791168 rs10941294 rs115777838 rs12638134 rs34402072 rs56105232 rs72809222 rs73186226 rs853612 rs995642                                                                     |
| 416 | genus.Streptococcus.id.1853                 | Forced expiratory volume in 1-second (FEV1), predicted percentage | 5qEckL | QoRiKP | 0 | 0.68213169903116 0.422817875790237 0.509963888781818 0.517140656210342 0.660442060810506 0.711142444019728 0.230183274543144 0.343764066591726 0.256068300020741 0.45453354655309 0.424130512147711 0.264069894555054 0.569236472364428 0.682175103062815                                                                            | rs10028567 rs10448310 rs11110281 rs11720390 rs11764382 rs17708276 rs1918540 rs2370083 rs4968759 rs57646748 rs6806351 rs72739637 rs7916711 rs9903102                                       |
| 417 | genus.Oscillibacter.id.2063                 | Forced expiratory volume in 1-second (FEV1), predicted percentage | 5TN0Z7 | QoRiKP | 0 | 0.534749246634584 0.947134129280873 0.709812780018706 0.850195417107482 0.902298028373794 0.841771196120736 0.888960473244334 0.838438562201121 0.429470646520326 0.850867630871302 0.79973096802535                                                                                                                                 | rs11627628 rs11990279 rs133832 rs16866406 rs16934185 rs234108 rs36095275 rs61883564 rs62206502 rs75453768 rs761240                                                                        |
| 418 | genus.Catenibacterium.id.2153               | Forced expiratory volume in 1-second (FEV1), predicted percentage | 5XtLwc | QoRiKP | 1 | 0.122045512420706 0.00100604446588481 0.195863034771336 0.174268867388717 0.192766368826184                                                                                                                                                                                                                                          | rs12404911 rs212393 rs73128290 rs77285108 rs7742829                                                                                                                                       |
| 419 | phylum.Tenericutes.id.3919                  | Forced expiratory volume in 1-second (FEV1), predicted percentage | 6gX3qe | QoRiKP | 0 | 0.886773015616313 0.565856100758418 0.802582654162321 0.58206913199811 0.64660346449681 0.87477870890334 0.618689087317084 0.665594251034905 0.988915624198383 0.990367636714001 0.616636056619754 0.872957549815072                                                                                                                 | rs10108398 rs11890098 rs12566890 rs17214486 rs2464826 rs28537087 rs3768491 rs4885016 rs6043847 rs72901605 rs74603314 rs78169027                                                           |
| 420 | family.Desulfovibrionaceae.id.3169          | Forced expiratory volume in 1-second (FEV1), predicted percentage | 6jMcBB | QoRiKP | 1 | 0.344941785695533 0.105742028864613 0.111819960831757 0.249825662525256 0.0897604668323727 0.142530212940456 0.0720593705703473 0.0268580761997497 0.222045953854124 0.211982860458503                                                                                                                                               | rs112381107 rs11599763 rs17791387 rs2692012 rs2838334 rs3935584 rs4506934 rs6058181 rs72647048 rs9928243                                                                                  |
| 421 | genus.Copro bacter.id.949                   | Forced expiratory volume in 1-second (FEV1), predicted percentage | 6mlWxZ | QoRiKP | 0 | 0.18844646221017 0.329597605882636 0.36439616634351 0.141466014079656 0.177054936996007 0.1736635579582 0.152720763998361 0.0867234980545023 0.290406303636853 0.151804595615815 0.221721658502576                                                                                                                                   | rs11532348 rs12684609 rs12996055 rs143662916 rs189356 rs213863 rs28402691 rs305411 rs3828477 rs72821405 rs74919520                                                                        |
| 422 | genus..Eubacteriumruminantiumgroup.id.11340 | Forced expiratory volume in 1-second (FEV1), predicted percentage | 77YJKV | QoRiKP | 0 | 0.0934133762941085 0.432367236215354 0.150393264715382 0.0976041336470963 0.113390302707027 0.123354704372439 0.262726153178479 0.25279516362597 0.152466224093782 0.207145421137313 0.203201460178802 0.207661916660175 0.166740478166589 0.092515045428596 0.196309013111188 0.186933127418926 0.161092618803753 0.248359359506276 | rs10131724 rs10923018 rs11637981 rs13025464 rs139749 rs16891896 rs17519472 rs209813 rs2116427 rs2229917 rs2418654 rs2817174 rs57340348 rs606117 rs6676699 rs7000472 rs72836424 rs73139629 |
| 423 | genus.Collinsella.id.815                    | Forced expiratory volume in 1-second (FEV1), predicted percentage | 7aTYpg | QoRiKP | 0 | 0.500935613184298 0.361922600317279 0.486155284564766 0.647147730102671 0.517356640910184 0.636931633708495 0.427316295455632 0.234057252746612 0.457580384374112                                                                                                                                                                    | rs10890671 rs11597285 rs1496626 rs149807560 rs2103510 rs62448871 rs73052258 rs75672793 rs9541268                                                                                          |

|     | A                                          | B                                                                 | C      | D      | E  | F                                                                                                                                                                                                                                                          | G                                                                                                                                                    |
|-----|--------------------------------------------|-------------------------------------------------------------------|--------|--------|----|------------------------------------------------------------------------------------------------------------------------------------------------------------------------------------------------------------------------------------------------------------|------------------------------------------------------------------------------------------------------------------------------------------------------|
| 424 | genus..Clostridiuminnocuumgroup.id.14397   | Forced expiratory volume in 1-second (FEV1), predicted percentage | 7dq OH | QoRiKP | 0  | 0.530768052101973 0.34590376144363 0.656257614943628 0.594748358283937 0.220853797505272 0.314062122744114 0.332944780672635 0.429391482270033 0.548423758123734                                                                                           | rs10074000 rs10506058 rs1942371 rs40656 rs4869133 rs61267978 rs6577484 rs6890185 rs77845139                                                          |
| 425 | phylum.Proteobacteria.id.2375              | Forced expiratory volume in 1-second (FEV1), predicted percentage | 7ioeKt | QoRiKP | 0  | 0.333132558278719 0.539791685317053 0.692169061061321 0.315239115653753 0.335347590973505 0.494488016018578 0.0844039121707445 0.515171434585195 0.345651209593699 0.543422542886418 0.342070021207141                                                     | rs10750258 rs11126162 rs11715072 rs12467198 rs2347697 rs2532663 rs3890996 rs4340090 rs6707783 rs72771021 rs922773                                    |
| 426 | genus.Anaerostipes.id.1991                 | Forced expiratory volume in 1-second (FEV1), predicted percentage | 80h8vf | QoRiKP | 0  | 0.433065049376555 0.425266638184386 0.456622495219643 0.243517308683983 0.516696669817993 0.349741679033728 0.365979231220087 0.545705461349185 0.150216848943748 0.136250092655664 0.142578021651843 0.419333087425587                                    | rs10502061 rs2014785 rs2396460 rs2804244 rs3900776 rs62157625 rs62215703 rs6474958 rs6726833 rs6854026 rs7193624 rs78735375                          |
| 427 | genus.Coprococcus3.id.11303                | Forced expiratory volume in 1-second (FEV1), predicted percentage | 8jKldu | QoRiKP | 1  | 0.289782684093598 0.210670146099756 0.210766857614526 0.182767000003521 0.236492405156051 0.0230960022393338 0.439335500986676 0.140361581707564 0.16573083525412                                                                                          | rs10810043 rs11077359 rs11080344 rs13247359 rs13394391 rs178271 rs4575475 rs7521171 rs8100692                                                        |
| 428 | genus.Paraprevotella.id.962                | Forced expiratory volume in 1-second (FEV1), predicted percentage | 8NULRM | QoRiKP | 0  | 0.228690108215728 0.467934324953896 0.27829552230874 0.386785891244808 0.532848882570473 0.138521734310561 0.254204333356123 0.276955721743537 0.138099270112131 0.290992702775401 0.25727456568027 0.449439212420686                                      | rs10842464 rs140997932 rs145020347 rs17109926 rs17785622 rs2081023 rs3008582 rs3801748 rs4756632 rs4767113 rs7240324 rs9602779                       |
| 429 | order.Gastranaerophilales.id.1591          | Forced expiratory volume in 1-second (FEV1), predicted percentage | 9i4tiU | QoRiKP | 0  | 0.684124744100419 0.182161422319061 0.656745819338026 0.368230405386578 0.71884534370913 0.585603573326656 0.493430994549269 0.875886623827533 0.512094650450297                                                                                           | rs11150282 rs113884518 rs28678345 rs367480 rs4129395 rs789069 rs79790072 rs8028558 rs9864379                                                         |
| 430 | genus.RuminococcaceaeUCG009.id.11366       | Forced expiratory volume in 1-second (FEV1), predicted percentage | 9s731W | QoRiKP | 0  | 0.684935042201082 0.35928252593116 0.357309142321917 0.388475193950304 0.242178476463392 0.579272149228796 0.417623818838251 0.590342181928485 0.527082252205525 0.64148273337534 0.963006221050162 0.437627900372696                                      | rs113006825 rs12508214 rs138460696 rs1550196 rs2058609 rs2192926 rs4079028 rs4708333 rs6952765 rs758191 rs78410648 rs9558661                         |
| 431 | genus.Parasutterella.id.2892               | Forced expiratory volume in 1-second (FEV1), predicted percentage | acLMuF | QoRiKP | 0  | 0.786989754202519 0.83604436898427 0.854403763101782 0.424852559279274 0.739675758158631 0.551634129684324 0.993205184288875 0.766798581495868 0.822703361234906 0.778189669597039 0.650224600900957 0.774000389987906 0.989193446761356 0.628022023282226 | rs10899911 rs11715853 rs2090816 rs2387977 rs35055552 rs55877868 rs6809952 rs6828768 rs7303158 rs7311004 rs7572229 rs78383039 rs8039785 rs823424      |
| 432 | genus.Turicibacter.id.2162                 | Forced expiratory volume in 1-second (FEV1), predicted percentage | AdsBD9 | QoRiKP | 0  | 0.314648579178833 0.439509131183777 0.56342675335535 0.263243412434819 0.445444226878284 0.31851279182233 0.478012772450058 0.646596378712714 0.567618219747824 0.988904919902384                                                                          | rs11054680 rs11666533 rs12603364 rs149744580 rs2834977 rs2952020 rs3734633 rs4869133 rs55756211 rs7199484                                            |
| 433 | order.Bifidobacteriales.id.432             | Forced expiratory volume in 1-second (FEV1), predicted percentage | aGfu8V | QoRiKP | 10 | 0.00360819578496302 0.031718656119236 0.043811929741404 0.0440464057052706 0.00463494911331392 0.0406118685329907 0.0225766818620077 0.0327374929088596 0.0144426224721761 0.00429515506373222                                                             | rs10831953 rs12446429 rs13020688 rs4957061 rs540489 rs55888705 rs6899771 rs7174549 rs73797465 rs857444                                               |
| 434 | genus.LachnospiraceaeUCG010.id.11330       | Forced expiratory volume in 1-second (FEV1), predicted percentage | AK0I7A | QoRiKP | 0  | 0.44591734182911 0.591072652283429 0.262912258361254 0.401683811248193 0.186970169997259 0.406030630056017 0.25166359085856 0.11078875103482 0.410069154121911 0.160631692396832                                                                           | rs10414815 rs11192447 rs12346653 rs17730011 rs2833528 rs336138 rs4576377 rs72894957 rs74315802 rs9981767                                             |
| 435 | genus.Faecalibacterium.id.2057             | Forced expiratory volume in 1-second (FEV1), predicted percentage | aKuChq | QoRiKP | 0  | 0.0525848968694345 0.0508234439759032 0.264991903531096 0.12593501514767 0.275920449148711 0.28758319808437 0.222609780196503 0.566427512062177 0.259352174163336                                                                                          | rs10927394 rs114946999 rs11776390 rs1271565 rs12753492 rs2835874 rs6910935 rs75499067 rs79656633                                                     |
| 436 | genus.Blautia.id.1992                      | Forced expiratory volume in 1-second (FEV1), predicted percentage | aKXyAu | QoRiKP | 0  | 0.409796549937128 0.367582802175565 0.185558993166516 0.455229496538809 0.249366392106247 0.260389262074587 0.416254951531483 0.570203409706114 0.336174000154359 0.330407576603192 0.11825567926352 0.225149664079743                                     | rs11149971 rs113271346 rs117001700 rs12453000 rs16892041 rs2788271 rs3005511 rs4926264 rs67794373 rs682885 rs72973581 rs7860714                      |
| 437 | genus.Clostridiumsensustricto1.id.1873     | Forced expiratory volume in 1-second (FEV1), predicted percentage | AN8qjo | QoRiKP | 0  | 0.227023977623088 0.806418896771736 0.365320906262919 0.624942587907618 0.787017060372701 0.129608189901004 0.415953981977061                                                                                                                              | rs11264403 rs115807074 rs116847295 rs12341505 rs2795528 rs2817172 rs550843                                                                           |
| 438 | genus..Eubacteriumventriosumgroup.id.11341 | Forced expiratory volume in 1-second (FEV1), predicted percentage | anDrA2 | QoRiKP | 0  | 0.936074558123324 0.88580197545522 0.999104879325103 0.890812293947014 0.673615937126023 0.965505938024314 0.824827026537445 0.996597150251236 0.851678688432091 0.852455136436625 0.934486078307772 0.817342600559601 0.80393460944129 0.868652866204675  | rs11617697 rs12964517 rs13082419 rs16884680 rs35179274 rs3809430 rs66746423 rs6704822 rs72783037 rs73615400 rs73849225 rs78250280 rs876734 rs9316536 |
| 439 | genus.RuminococcaceaeNK4A214group.id.11358 | Forced expiratory volume in 1-second (FEV1), predicted percentage | ASQ2fp | QoRiKP | 0  | 0.54552823493138 0.941212847815219 0.612075948129987 0.858435120468136 0.817780964934837 0.689953205975926 0.83423631753884 0.997049418710979 0.356362447766119 0.553542452673907 0.947093243335425 0.962235364746477 0.725658529403524                    | rs11241747 rs11586410 rs12642039 rs12731 rs13087692 rs136761 rs147475196 rs35559912 rs4814689 rs5994253 rs62027366 rs6681678 rs7573569               |

|     | A                                           | B                                                                 | C      | D      | E  | F                                                                                                                                                                                                                                                                                                                                                | G                                                                                                                                                                                                      |
|-----|---------------------------------------------|-------------------------------------------------------------------|--------|--------|----|--------------------------------------------------------------------------------------------------------------------------------------------------------------------------------------------------------------------------------------------------------------------------------------------------------------------------------------------------|--------------------------------------------------------------------------------------------------------------------------------------------------------------------------------------------------------|
| 440 | genus.Anaerotruncus.id.2054                 | Forced expiratory volume in 1-second (FEV1), predicted percentage | aToCrK | QoRiKP | 1  | 0.582075426059522 0.0363789610112336 0.610098185195183 0.476934112624556 0.394769939589647 0.460071524853003 0.540568673985656 0.584521782779473 0.601999981031963 0.537045387898322 0.158153322436036 0.614810582599802 0.509310207190957                                                                                                       | rs10150232 rs11018566 rs115414803 rs1272208 rs1431492 rs17734739 rs34449434 rs4669806 rs6494922 rs6563550 rs7155595 rs8005030 rs9347879                                                                |
| 441 | family.Prevotellaceae.id.960                | Forced expiratory volume in 1-second (FEV1), predicted percentage | axDRMS | QoRiKP | 0  | 0.67961401156302 0.578240387021517 0.441075230140905 0.579571699459884 0.742430423755058 0.992195946606482 0.811672217355322 0.861077014863076 0.838245944907919 0.560090943370238 0.863557106436177 0.913799468786238 0.824118807293514 0.471445311588203 0.829809991068047                                                                     | rs12057990 rs12118202 rs13069367 rs148376875 rs2206482 rs2278540 rs3758087 rs3860225 rs4493272 rs4685827 rs7252711 rs7975087 rs912860 rs9586501 rs9958960                                              |
| 442 | family.Verrucomicrobiaceae.id.4036          | Forced expiratory volume in 1-second (FEV1), predicted percentage | AXpdwL | QoRiKP | 0  | 0.230818681826786 0.145259315130791 0.268242225364122 0.07077122864968 0.12625872271324 0.304517759029094 0.353851432415037 0.370944396928714 0.435627152034969 0.476590262896301 0.279119091832292                                                                                                                                              | rs111862613 rs117107102 rs11729256 rs12908520 rs2602429 rs4242783 rs4936098 rs61779207 rs74542928 rs9349825 rs941682                                                                                   |
| 443 | genus.Roseburia.id.2012                     | Forced expiratory volume in 1-second (FEV1), predicted percentage | B5jn0Y | QoRiKP | 13 | 0.0063139747198048 0.00662216317799771 0.0106979966091957 0.00217758289049007 0.00219292980023834 0.0011891986556982 0.00263628016731534 0.0013454034218724 0.00587352421403114 0.00182237873081417 0.00462259202168672 0.00488658440196774 0.000988887587710118                                                                                 | rs147990086 rs16910295 rs2160994 rs2943022 rs302266 rs329182 rs55858165 rs57466170 rs6445851 rs6930661 rs75326254 rs78753150 rs9300744                                                                 |
| 444 | genus.Sutterella.id.2896                    | Forced expiratory volume in 1-second (FEV1), predicted percentage | BiKMtW | QoRiKP | 0  | 0.615575377918615 0.639367308613041 0.88215761140126 0.995189912727865 0.913460636137257 0.711683406329536 0.767254111450251 0.67556171995974 0.930087967969154 0.930074227474322 0.103607240254457 0.791123416599666                                                                                                                            | rs1145877 rs11591622 rs13173038 rs143438747 rs2050185 rs2321387 rs2613606 rs607327 rs62501473 rs7499539 rs7638039 rs9350083                                                                            |
| 445 | genus.Ruminococcaceae.UG013.id.11370        | Forced expiratory volume in 1-second (FEV1), predicted percentage | BLC7wV | QoRiKP | 0  | 0.88488065402602 0.883309991253576 0.680050299166402 0.555594983518223 0.576227726274479 0.592422207160093 0.972550077365414 0.76363664072471 0.679950219971934 0.38918353559184 0.649910246429363 0.780813614960282                                                                                                                             | rs11581881 rs12189346 rs12336782 rs12485353 rs12781711 rs16918863 rs2730183 rs4385846 rs75088940 rs76973485 rs7784330 rs9313055                                                                        |
| 446 | family.Rikenellaceae.id.967                 | Forced expiratory volume in 1-second (FEV1), predicted percentage | BLSFBU | QoRiKP | 0  | 0.904319818319068 0.871220521681137 0.94814028762205 0.86230169658383 0.90085208350224 0.935784555034479 0.534368359776494 0.737182378332125 0.757891850427765 0.93885727200115 0.959090415841535 0.580835851910098 0.957151044932882 0.780972348934678 0.862138110649262 0.99477208729389 0.958419198492862 0.979398902660762 0.985659520934959 | rs10217435 rs10832801 rs1939881 rs2447496 rs2833282 rs35909684 rs36021379 rs4264350 rs59663348 rs62532512 rs6744030 rs67705352 rs6837275 rs7242694 rs74474130 rs77885767 rs9389714 rs9578457 rs9603208 |
| 447 | order.Verrucomicrobiales.id.4030            | Forced expiratory volume in 1-second (FEV1), predicted percentage | BPW89n | QoRiKP | 0  | 0.231093588438149 0.145499372363579 0.268522599496624 0.0709749829388303 0.12625633323527 0.304864508016045 0.354176051737731 0.371151886643276 0.436039788455486 0.476745023722901 0.279396464089776                                                                                                                                            | rs111862613 rs117107102 rs11729256 rs12908520 rs2602429 rs4242783 rs4936098 rs61779207 rs74542928 rs9349825 rs941682                                                                                   |
| 448 | genus.Lachnospiraceae.NK4A136group.id.11319 | Forced expiratory volume in 1-second (FEV1), predicted percentage | Bt0kEx | QoRiKP | 0  | 0.318716583966491 0.144134352374857 0.141269470586997 0.214134574644094 0.314918105327979 0.292586045163074 0.230279961211352 0.263001800528024 0.15556268759426 0.599340971805898 0.275560015556573 0.48462540601414 0.358310664486765                                                                                                          | rs11263806 rs12611395 rs160061 rs28540839 rs2880566 rs4955932 rs59805249 rs68104925 rs73044693 rs7616165 rs76193507 rs7832116 rs954878                                                                 |
| 449 | family.Rhodospirillaceae.id.2717            | Forced expiratory volume in 1-second (FEV1), predicted percentage | Bt1upE | QoRiKP | 0  | 0.638399967394374 0.338010024779775 0.265724423375695 0.198707236101356 0.632496739205118 0.614788455216249 0.538390950766919 0.482148752372899 0.73375777985022 0.514369373982758 0.253231590863709 0.409333187904607 0.646760089038882 0.514169985311975                                                                                       | rs1035406 rs11591293 rs1549633 rs1923415 rs3754624 rs4278423 rs55876211 rs61933850 rs6679026 rs7001029 rs72714493 rs74354280 rs76784716 rs9813022                                                      |
| 450 | order.Victivallales.id.2254                 | Forced expiratory volume in 1-second (FEV1), predicted percentage | C1xV1V | QoRiKP | 0  | 0.596051756676624 0.260339294380244 0.367425135501982 0.182750427636182 0.411087645240131 0.848129639665515 0.776729685735216 0.362369786849859                                                                                                                                                                                                  | rs1002941 rs11770843 rs17114848 rs2031282 rs2825714 rs62570196 rs72640280 rs77599476                                                                                                                   |
| 451 | genus.Sellimonas.id.14369                   | Forced expiratory volume in 1-second (FEV1), predicted percentage | c62fwk | QoRiKP | 0  | 0.604274313733093 0.537054204143395 0.96000439477596 0.799943721353238 0.420549598116672 0.545638329634699 0.888714794637659 0.799767248427384                                                                                                                                                                                                   | rs113379006 rs2016057 rs2187447 rs2371572 rs41816 rs4600608 rs553697 rs56203279                                                                                                                        |
| 452 | genus.Coproccoccus1.id.11301                | Forced expiratory volume in 1-second (FEV1), predicted percentage | cqFLTQ | QoRiKP | 0  | 0.622445364793089 0.840619580951187 0.948912013717313 0.987342084721006 0.871275857416791 0.851289113377625 0.980616288054294 0.975777984525396 0.715183424012677 0.775265690915575 0.862144829223278 0.220795327665496                                                                                                                          | rs1010560 rs12794898 rs1519491 rs1576241 rs1762123 rs2907920 rs4277593 rs56405618 rs73031725 rs73167075 rs74101919 rs946513                                                                            |
| 453 | family.ClostridialesvadinBB60group.id.11286 | Forced expiratory volume in 1-second (FEV1), predicted percentage | CUtsMo | QoRiKP | 0  | 0.658828183010582 0.192843546842017 0.515548985705287 0.6580698160039 0.671905347623086 0.860137457700994 0.45286495784038 0.942026459089566 0.59560494489913 0.553776356980735 0.672831993323361 0.77219933401662 0.457626150912038 0.769700036057145                                                                                           | rs10517600 rs10904722 rs13409132 rs17121075 rs2191834 rs28691777 rs34088226 rs55682560 rs6588624 rs66714985 rs7226487 rs7538034 rs7725895 rs989682                                                     |
| 454 | order.Actinomycetales.id.420                | Forced expiratory volume in 1-second (FEV1), predicted percentage | CYNr8c | QoRiKP | 1  | 0.326489779320512 0.444012974540357 0.0144495868301636 0.364604495360112 0.460332992504458                                                                                                                                                                                                                                                       | rs2889192 rs34583783 rs35011108 rs4073240 rs58484246                                                                                                                                                   |
| 455 | family.Lactobacillaceae.id.1836             | Forced expiratory volume in 1-second (FEV1), predicted percentage | d9u3Wa | QoRiKP | 0  | 0.63434644686279 0.816677295987688 0.497868901158937 0.505402322461699 0.407896571993474 0.236395737202317 0.937704609659895 0.258865201981386                                                                                                                                                                                                   | rs11674854 rs16861661 rs62314653 rs74599091 rs768253 rs77478751 rs921925 rs9345899                                                                                                                     |

|     | A                                         | B                                                                 | C      | D      | E | F                                                                                                                                                                                                                                         | G                                                                                                                                     |
|-----|-------------------------------------------|-------------------------------------------------------------------|--------|--------|---|-------------------------------------------------------------------------------------------------------------------------------------------------------------------------------------------------------------------------------------------|---------------------------------------------------------------------------------------------------------------------------------------|
| 456 | class.Alphaproteobacteria.id.2379         | Forced expiratory volume in 1-second (FEV1), predicted percentage | dP6VTT | QoRiKP | 0 | 0.0629788563277019 0.895690119405328 0.682358588012603 0.677751970612566 0.876745810794934 0.388816489640281 0.647726190762774                                                                                                            | rs140912403 rs34569731 rs55876211 rs62285697 rs76784716 rs7960664 rs9813022                                                           |
| 457 | order.Enterobacteriales.id.3468           | Forced expiratory volume in 1-second (FEV1), predicted percentage | dSCeM7 | QoRiKP | 0 | 0.521020782760357 0.747209945660855 0.11518287040738 0.33636459140721 0.5459563914152 0.199115081276204 0.331526849834252                                                                                                                 | rs11026530 rs2374342 rs35673018 rs504442 rs62210023 rs78143293 rs79757635                                                             |
| 458 | family.BacteroidalesS24.7group.id.11173   | Forced expiratory volume in 1-second (FEV1), predicted percentage | DwGyne | QoRiKP | 0 | 0.50013341017386 0.989816663545341 0.669296315048227 0.364030682958255 0.801179065197714 0.713935361515304 0.653621369766229 0.438365439517901                                                                                            | rs10872669 rs12748533 rs17043785 rs61508842 rs689695 rs738193 rs78609301 rs941000                                                     |
| 459 | genus.Oxalobacter.id.2978                 | Forced expiratory volume in 1-second (FEV1), predicted percentage | E1ZDX3 | QoRiKP | 0 | 0.485573930199616 0.483811478230903 0.821006743801297 0.620548220742641 0.673916344627664 0.593782330314111 0.805604846282214 0.454736481350376 0.483139975125114 0.739591213231445 0.649500942363308                                     | rs10464997 rs11108500 rs111966731 rs12002250 rs1569853 rs36057338 rs3862635 rs4428215 rs6000536 rs6993398 rs736744                    |
| 460 | genus.Dorea.id.1997                       | Forced expiratory volume in 1-second (FEV1), predicted percentage | e5mJnF | QoRiKP | 0 | 0.18939500568433 0.256538960524652 0.218126807617838 0.564440409270928 0.147670874033184 0.35787468502857 0.643813421198512 0.504879397421686 0.282643667521849 0.386738942237645                                                         | rs11150408 rs12537781 rs13279148 rs1899291 rs3005511 rs345219 rs3752849 rs4793307 rs62503162 rs73729431                               |
| 461 | genus.Ruminococcus1.id.11373              | Forced expiratory volume in 1-second (FEV1), predicted percentage | ebP4zV | QoRiKP | 0 | 0.604762750157552 0.897503061767387 0.775511875763595 0.670204343044877 0.653851910536098 0.761567003680963 0.881417984140315 0.506748427436222 0.70593576412619 0.826931759233433                                                        | rs10167839 rs11783695 rs17781867 rs3819978 rs6105066 rs6493760 rs7117576 rs7583465 rs78572139 rs78613526                              |
| 462 | family.Clostridiaceae1.id.1869            | Forced expiratory volume in 1-second (FEV1), predicted percentage | FcqSNY | QoRiKP | 0 | 0.770079395431466 0.714348164407315 0.713041415111063 0.49793775806916 0.605307432995543 0.816874211665436 0.95555111859238 0.908180810379453 0.814337740703743 0.75312289990113                                                          | rs10875374 rs12186080 rs12341505 rs2795528 rs2817172 rs4723021 rs550843 rs56188186 rs62397761 rs881532                                |
| 463 | phylum.Verrucomicrobia.id.3982            | Forced expiratory volume in 1-second (FEV1), predicted percentage | fE3r8h | QoRiKP | 0 | 0.676861899811003 0.90279627986284 0.75915276858652 0.919853352355621 0.977028048633492 0.954844800081453 0.989628233754071 0.90887609163815 0.602881046112415 0.488141189186978 0.852487497722712 0.41115776687272                       | rs11252894 rs117107102 rs11729256 rs12512971 rs12908520 rs2602429 rs3995795 rs45598138 rs61779207 rs74542928 rs76430504 rs9349825     |
| 464 | family.Actinomycetaceae.id.421            | Forced expiratory volume in 1-second (FEV1), predicted percentage | FFi1Rd | QoRiKP | 1 | 0.326105442225363 0.443299070215321 0.0144235258834638 0.363797091751155 0.460958540566033                                                                                                                                                | rs2889192 rs34583783 rs35011108 rs4073240 rs58484246                                                                                  |
| 465 | order.Erysipelotrichales.id.2148          | Forced expiratory volume in 1-second (FEV1), predicted percentage | FIVBaS | QoRiKP | 0 | 0.357155943941057 0.144603936317432 0.122883681631921 0.138981033960195 0.468571989530261 0.116962945288059 0.187268645581128 0.145134775856272 0.142095626739558 0.358859966383109 0.176132050654731 0.176084656935189 0.168581453488009 | rs1074800 rs10781552 rs17530232 rs1884466 rs2300774 rs290833 rs35161940 rs4078432 rs56970041 rs62504403 rs7234058 rs7826267 rs8003149 |
| 466 | class.Clostridia.id.1859                  | Forced expiratory volume in 1-second (FEV1), predicted percentage | Fr2Ff4 | QoRiKP | 3 | 0.00935103327605381 0.108580126763101 0.0884789020971307 0.151349232320396 0.0705241942790651 0.0243518395903561 0.0743170477839415 0.13585247926596 0.0535425757693619 0.058424420671013 0.0485772306179855 0.117705033067059            | rs10774377 rs112334273 rs13105690 rs13179700 rs1842454 rs2273429 rs6797343 rs6814436 rs6815608 rs72738886 rs72915163 rs76767978       |
| 467 | class.Gammaproteobacteria.id.3303         | Forced expiratory volume in 1-second (FEV1), predicted percentage | FRQYhm | QoRiKP | 5 | 0.00432856679181515 0.0197744358582845 0.0408760090946016 0.0169281555595994 0.0616743932931569 0.0532161276951435 0.0185545370257108                                                                                                     | rs11181912 rs12404135 rs2234691 rs6706173 rs75101789 rs79795896 rs9494710                                                             |
| 468 | genus.Actinomyces.id.423                  | Forced expiratory volume in 1-second (FEV1), predicted percentage | FT7OrH | QoRiKP | 0 | 0.857188279493491 0.766790910476309 0.158038852244224 0.634816747097383 0.44791003529239 0.366987409485432 0.364091965333983                                                                                                              | rs2715439 rs34583783 rs35011108 rs4073240 rs4146653 rs71315246 rs7915461                                                              |
| 469 | family.FamilyXI.id.1936                   | Forced expiratory volume in 1-second (FEV1), predicted percentage | FXBXNG | QoRiKP | 0 | 0.902921802838412 0.64696349317906 0.347971395697039 0.489304457685417 0.794462314751672 0.195962475349905 0.612037666315562 0.957123420920052                                                                                            | rs10759623 rs11547158 rs17379710 rs2155352 rs2156611 rs3733511 rs488164 rs697771                                                      |
| 470 | phylum.Lentisphaerae.id.2238              | Forced expiratory volume in 1-second (FEV1), predicted percentage | gkAVOW | QoRiKP | 0 | 0.469019631058184 0.171741234473962 0.268599164363713 0.11562433144537 0.303831750894112 0.405024641584769 0.681146914844132 0.6141131431501 0.261756421436044                                                                            | rs1002941 rs11770843 rs17114848 rs2031282 rs2825714 rs60995569 rs62570196 rs72640280 rs77599476                                       |
| 471 | genus..Ruminococcusgavreauigroup.id.11342 | Forced expiratory volume in 1-second (FEV1), predicted percentage | GNp2YQ | QoRiKP | 0 | 0.540755062610273 0.534053856057231 0.602910360247565 0.589117526908714 0.670623791476078 0.180490702053647 0.839223817026519 0.302413738271156 0.596655765903074 0.54578607985622 0.334171665316336 0.278130115412008                    | rs10931481 rs12079579 rs12539819 rs1391597 rs2047242 rs2105937 rs2166943 rs289410 rs431418 rs71386687 rs73802842 rs9870933            |

|     | A                                       | B                                                                 | C       | D      | E | F                                                                                                                                                                                                                                                                                                                | G                                                                                                                                                                                   |
|-----|-----------------------------------------|-------------------------------------------------------------------|---------|--------|---|------------------------------------------------------------------------------------------------------------------------------------------------------------------------------------------------------------------------------------------------------------------------------------------------------------------|-------------------------------------------------------------------------------------------------------------------------------------------------------------------------------------|
| 472 | genus.RikenellaceaeRC9gutgroup.id.11191 | Forced expiratory volume in 1-second (FEV1), predicted percentage | hUph1f  | QoRiKP | 0 | 0.863580374862387 0.570666914949376 0.600775613429171 0.926233288553168 0.671176748120671 0.475175992053802 0.607888901617152 0.315402500430213 0.524994394827744 0.409634153352236 0.292300474172157                                                                                                            | rs12501673 rs17032291 rs17582787 rs2074881 rs2900503 rs2998141 rs4270579 rs4717843 rs7712231 rs80309088 rs9887954                                                                   |
| 473 | genus.TyzzereIIa3.id.11335              | Forced expiratory volume in 1-second (FEV1), predicted percentage | l2CEyx  | QoRiKP | 0 | 0.604568468473914 0.52678164128035 0.4876833032398 0.277547940301284 0.314269896859595 0.378428613711504 0.161844428927462 0.728365759135457 0.634302412969886 0.725149792703296 0.424855489959216 0.667806636863443                                                                                             | rs10898797 rs1232220 rs17706273 rs191093 rs4904512 rs55799124 rs67476743 rs6920448 rs7019909 rs7333521 rs75091807 rs7561370                                                         |
| 474 | genus.Prevotella9.id.11183              | Forced expiratory volume in 1-second (FEV1), predicted percentage | l5XXsr  | QoRiKP | 0 | 0.269297033661902 0.337594878073473 0.287251220025422 0.398325248555957 0.468845039691163 0.137725348085523 0.231211353587016 0.444376242933343 0.203765716100052 0.467141957309795 0.146139764567068 0.352124758183875 0.539926306375239 0.340556058778751                                                      | rs111509883 rs11685699 rs117271932 rs12648235 rs1304512 rs2104588 rs2495052 rs2683313 rs4968431 rs7237249 rs746764 rs7976209 rs9428102 rs9613013                                    |
| 475 | genus.Erysipelatoclostridium.id.11381   | Forced expiratory volume in 1-second (FEV1), predicted percentage | lAhkfC  | QoRiKP | 0 | 0.337855289043077 0.182823664204826 0.337266314721896 0.205861490909944 0.222808017246682 0.341221219888622 0.187503861765526 0.352416145882795 0.284411682950802 0.160962428059782 0.399119300125796 0.421178050340837 0.174896819455284 0.238094499764802 0.250431986605995                                    | rs1434153 rs16936671 rs17804233 rs2901723 rs340991 rs3804326 rs45480394 rs4697572 rs58236560 rs61806970 rs622418 rs6474512 rs710230 rs7221249 rs9590927                             |
| 476 | class.Bacilli.id.1673                   | Forced expiratory volume in 1-second (FEV1), predicted percentage | lgBtIU  | QoRiKP | 0 | 0.589581644242119 0.688263645950278 0.428171981614996 0.60338107818952 0.554797051690157 0.547903089330123 0.889828807711328 0.463914996336444 0.521253298135303 0.692814756336099 0.347451451204193 0.460157349549019 0.485583742889448 0.485763406314593 0.604226391109528 0.514530550100512 0.615585695349796 | rs11110282 rs11730038 rs12797734 rs13068444 rs1595463 rs28564647 rs34989881 rs35344081 rs4028634 rs4459992 rs57872228 rs694949 rs74663707 rs7666190 rs77558518 rs78938557 rs9581006 |
| 477 | phylum.Actinobacteria.id.400            | Forced expiratory volume in 1-second (FEV1), predicted percentage | lI0qrp  | QoRiKP | 0 | 0.591605113312843 0.594072635132213 0.78000943961881 0.396386681061837 0.663990665025796 0.995482569983108 0.88889170412194 0.986778884180576 0.595124694333808 0.79701779240447 0.934355644422994 0.343776628053871 0.638557886799865 0.784731076674642                                                         | rs11766971 rs12528285 rs13192624 rs1397793 rs4429415 rs55888705 rs6496870 rs6743026 rs74037001 rs75211493 rs80124826 rs8047955 rs857444 rs9833771                                   |
| 478 | genus.Ruminiclostridium5.id.11355       | Forced expiratory volume in 1-second (FEV1), predicted percentage | lMGTCd  | QoRiKP | 0 | 0.54885346501401 0.85964671466297 0.83066167365323 0.56441928467926 0.713811392159514 0.914925355051198 0.530045602294919 0.983635752099466 0.795463502483078 0.298125739782769                                                                                                                                  | rs10827477 rs113753996 rs1223978 rs1492620 rs2791343 rs2833828 rs4955951 rs6121460 rs79968837 rs8053158                                                                             |
| 479 | genus.Ruminiclostridium6.id.11356       | Forced expiratory volume in 1-second (FEV1), predicted percentage | liwPbIH | QoRiKP | 0 | 0.579491063650425 0.258305154333075 0.5659926615351 0.502469752262634 0.612447098548992 0.904415370917176 0.497613653568489 0.660904616905627 0.104279437362168 0.637863453779177 0.551729986840288 0.572670302818503 0.455738030732099 0.644289619895601 0.718025905605935                                      | rs10829821 rs116969552 rs11992182 rs2548459 rs35362464 rs61060922 rs663262 rs67479537 rs71414120 rs72991535 rs73176030 rs77193512 rs792058 rs79968172 rs9555756                     |
| 480 | order.NB1n.id.3953                      | Forced expiratory volume in 1-second (FEV1), predicted percentage | lJ0mByI | QoRiKP | 0 | 0.923226327986443 0.51871234586462 0.890898691550044 0.971937348242442 0.639279684531154 0.576752137853909 0.735390122463444 0.204125724297891 0.979168636827747 0.93352774427697 0.776561858192773 0.815216298343865 0.572744223785626                                                                          | rs11251024 rs11606187 rs13385922 rs166849 rs2172426 rs267959 rs4383094 rs60583455 rs60775321 rs72671304 rs7911787 rs8126061 rs9542068                                               |
| 481 | genus.CandidatusSoleaferrea.id.11350    | Forced expiratory volume in 1-second (FEV1), predicted percentage | lj4g0ZV | QoRiKP | 0 | 0.300879929082223 0.632810921863203 0.378167418773883 0.260561199854986 0.458007893633393 0.865396649991226 0.726297564892149 0.776156023607561 0.700370623036446                                                                                                                                                | rs10090365 rs10108780 rs10809135 rs4294381 rs4678258 rs6489992 rs6494306 rs7400877 rs9973954                                                                                        |
| 482 | genus.Eisenbergiella.id.11304           | Forced expiratory volume in 1-second (FEV1), predicted percentage | lj87dXS | QoRiKP | 3 | 0.0695031137604693 0.0607996208219968 0.0784667200280973 0.0635944889942602 0.00902485286048023 0.00531341984226498 0.0615992168527422 0.0812224695268373 0.054778866435561 0.0916058340079824 0.00649782096364861                                                                                               | rs11027642 rs11079158 rs11938607 rs12257723 rs12710729 rs13258851 rs1508033 rs1553971 rs2683098 rs3812426 rs4462860                                                                 |
| 483 | order.Lactobacillales.id.1800           | Forced expiratory volume in 1-second (FEV1), predicted percentage | ljfZByg | QoRiKP | 0 | 0.495200088654129 0.79591970134823 0.587074189124603 0.33859401008706 0.461607870493139 0.313276186468224 0.81101484103622 0.368194904768354 0.426331986501684 0.270279064832568 0.392064472413776 0.507779602187427 0.421223890618123 0.513166106544417                                                         | rs11110282 rs11627423 rs11730038 rs12797734 rs1595463 rs2370083 rs34989881 rs35344081 rs4028634 rs57872228 rs74663707 rs77558518 rs78938557 rs9581006                               |
| 484 | genus.Adlercreutzia.id.812              | Forced expiratory volume in 1-second (FEV1), predicted percentage | lJHChB7 | QoRiKP | 0 | 0.655980290749836 0.708818353701296 0.546875030030038 0.719442170320259 0.61802623535168 0.933205760335541 0.33810650010448 0.687116606294379                                                                                                                                                                    | rs11604400 rs13231526 rs2717140 rs55719207 rs6664405 rs7680684 rs9490822 rs9915817                                                                                                  |
| 485 | order.Pasteurellales.id.3688            | Forced expiratory volume in 1-second (FEV1), predicted percentage | ljHia6Z | QoRiKP | 0 | 0.270276081077765 0.125823574221038 0.273486136018032 0.172210048383828 0.414463862731829 0.126538378573928 0.270176530149556 0.441824348585956 0.370066740533988 0.469337290561027 0.41252019794246 0.235461303470782 0.392485408649001 0.117952578414316                                                       | rs10965428 rs111582866 rs12050685 rs16970009 rs35510 rs4822728 rs6972479 rs72756943 rs73139353 rs76022354 rs78909003 rs9382510 rs9895850 rs9938097                                  |
| 486 | genus.Enterorhabdus.id.820              | Forced expiratory volume in 1-second (FEV1), predicted percentage | lJc3Fm  | QoRiKP | 0 | 0.977390176893941 0.57290022655009 0.35560775606261 0.55790625495303 0.867238716214789 0.878881534487241                                                                                                                                                                                                         | rs10098492 rs114731706 rs2051957 rs3017103 rs73331712 rs77655283                                                                                                                    |
| 487 | genus.Butyricimonas.id.945              | Forced expiratory volume in 1-second (FEV1), predicted percentage | ljUcEpg | QoRiKP | 0 | 0.200091879858577 0.32705297602872 0.201217653471457 0.378552284495524 0.388683596165822 0.376251715320051 0.477090090386569 0.444318370382505 0.0840879638847334 0.235151051542398 0.101211958564063 0.452321643380428                                                                                          | rs11228830 rs113054641 rs12304031 rs1862649 rs2114713 rs62130338 rs62390301 rs7083431 rs71428626 rs72814525 rs78453362 rs9657374                                                    |

|     | A                                    | B                                                                 | C      | D      | E  | F                                                                                                                                                                                                                                                                                                                | G                                                                                                                                                                                    |
|-----|--------------------------------------|-------------------------------------------------------------------|--------|--------|----|------------------------------------------------------------------------------------------------------------------------------------------------------------------------------------------------------------------------------------------------------------------------------------------------------------------|--------------------------------------------------------------------------------------------------------------------------------------------------------------------------------------|
| 488 | genus.RuminococcaceaeUCG010.id.11367 | Forced expiratory volume in 1-second (FEV1), predicted percentage | kjA5PB | QoRiKP | 0  | 0.374001688936938 0.258853863055426 0.849643022352334 0.340938877916448 0.841611442822155 0.573590069512308                                                                                                                                                                                                      | rs12597105 rs2820282 rs682403 rs6958419 rs73218807 rs7441445                                                                                                                         |
| 489 | family.Defluviitaleaceae.id.1924     | Forced expiratory volume in 1-second (FEV1), predicted percentage | kodRd1 | QoRiKP | 0  | 0.724417184422319 0.789587699584617 0.872148222407404 0.5801776025329 0.746414046256901 0.979272905763113 0.767833354300035 0.671017775940883 0.82620281614829 0.944108439855323 0.818146487566595                                                                                                               | rs112893842 rs1582238 rs17051335 rs1908593 rs4344384 rs4677103 rs540220 rs55658617 rs72731813 rs9608282 rs9725395                                                                    |
| 490 | genus.Prevotella7.id.11182           | Forced expiratory volume in 1-second (FEV1), predicted percentage | LCZ8yH | QoRiKP | 0  | 0.612946356974366 0.396349102355666 0.355945596956394 0.141686774990335 0.71097397156952 0.457596789294636 0.709027186082932 0.619346883666809 0.438447212295698 0.800019426063538 0.846158739212704                                                                                                             | rs118038478 rs12124567 rs12195431 rs2240542 rs2918132 rs430270 rs57404562 rs79263163 rs9426434 rs9608249 rs9959718                                                                   |
| 491 | genus.RuminococcaceaeUCG003.id.11361 | Forced expiratory volume in 1-second (FEV1), predicted percentage | lJcL8y | QoRiKP | 0  | 0.661911967819847 0.832266771527483 0.760968165870227 0.860206643519604 0.818645929673913 0.692965268741401 0.384648647901868 0.220025192891279 0.61816813203814 0.753261887513388 0.902432102562807 0.451549619693834                                                                                           | rs10490280 rs11243416 rs11613919 rs16959793 rs2523124 rs3013089 rs4452755 rs4532474 rs646327 rs6759615 rs73341549 rs78720113                                                         |
| 492 | genus.Terrisporobacter.id.11348      | Forced expiratory volume in 1-second (FEV1), predicted percentage | LKYg6S | QoRiKP | 0  | 0.193695114065102 0.118675906355135 0.119692232979957 0.0923983132399181 0.169769411383663                                                                                                                                                                                                                       | rs1883097 rs2569953 rs2872237 rs58405430 rs7184125                                                                                                                                   |
| 493 | family.Bifidobacteriaceae.id.433     | Forced expiratory volume in 1-second (FEV1), predicted percentage | LRKdla | QoRiKP | 10 | 0.00360819578496302 0.031718656119236 0.043811929741404 0.0440464057052706 0.00463494911331392 0.0406118685329907 0.0225766818620077 0.0327374929088596 0.0144426224721761 0.00429515506373222                                                                                                                   | rs10831953 rs12446429 rs13020688 rs4957061 rs540489 rs55888705 rs6899771 rs7174549 rs73797465 rs857444                                                                               |
| 494 | order.Desulfovibrionales.id.3156     | Forced expiratory volume in 1-second (FEV1), predicted percentage | m0ByAU | QoRiKP | 0  | 0.429075056813734 0.14958166045022 0.156873921131922 0.0874170615390733 0.318244432475312 0.13148101588591 0.190650334948075 0.110511175084534 0.054962349435465 0.203762771691769 0.291317556642505 0.273178904147202                                                                                           | rs112381107 rs11599763 rs17791387 rs186073 rs2692012 rs2838334 rs3935584 rs4506934 rs6058181 rs62020470 rs72647048 rs9928243                                                         |
| 495 | family.Enterobacteriaceae.id.3469    | Forced expiratory volume in 1-second (FEV1), predicted percentage | m9LXEq | QoRiKP | 0  | 0.521020782760357 0.747209945660855 0.11518287040738 0.33636459140721 0.5459563914152 0.199115081276204 0.331526849834252                                                                                                                                                                                        | rs11026530 rs2374342 rs35673018 rs504442 rs62210023 rs78143293 rs79757635                                                                                                            |
| 496 | family.Coriobacteriaceae.id.811      | Forced expiratory volume in 1-second (FEV1), predicted percentage | MBOR7Y | QoRiKP | 0  | 0.648672353616368 0.563764943328612 0.713913920398196 0.785908040599452 0.972032731090753 0.362903190781537 0.755497501622904 0.960537647436087 0.664810970342217 0.62462952055733 0.791659900356306 0.82666833133805 0.668900824714695 0.520827182213513                                                        | rs11073596 rs11250875 rs11656361 rs12974142 rs13307134 rs1397793 rs1816223 rs240104 rs2442778 rs3025411 rs34739816 rs67561917 rs719099 rs8010111                                     |
| 497 | genus.Lachnodostridium.id.11308      | Forced expiratory volume in 1-second (FEV1), predicted percentage | MpL626 | QoRiKP | 1  | 0.203409860049015 0.285470999750199 0.1398579220893 0.0518377412419943 0.221751525776864 0.214466885809519 0.259988011063451 0.122541982986982 0.146035077226907 0.226892595450292 0.0489335013211974 0.0701105346663097 0.171070762873568                                                                       | rs1031599 rs12566975 rs1528479 rs1997204 rs2385421 rs3821998 rs4738679 rs6112314 rs615997 rs62285313 rs72829893 rs78068103 rs789029                                                  |
| 498 | class.Melainabacteria.id.1589        | Forced expiratory volume in 1-second (FEV1), predicted percentage | Msb4zz | QoRiKP | 0  | 0.991793688297269 0.989616587049487 0.654636522374149 0.676679303982477 0.684411245610566 0.983421996744105 0.622724677141772 0.777175688952198 0.8620079388257 0.843350000984715                                                                                                                                | rs10148250 rs10738747 rs11150282 rs113884518 rs28678345 rs367480 rs4129395 rs789069 rs79790072 rs9864379                                                                             |
| 499 | class.Negativicutes.id.2164          | Forced expiratory volume in 1-second (FEV1), predicted percentage | MXS84H | QoRiKP | 11 | 0.00104318401880359 0.0233178453518447 0.013697655054976 0.00450387504392665 0.00371438820386536 0.0116027405959215 0.02010594179417 0.0177195076356917 0.0256807117338235 0.00497237341424336 0.0173080788711653                                                                                                | rs13086907 rs1643968 rs1649999 rs2834062 rs4463806 rs4722181 rs60274479 rs61249479 rs71405394 rs73232831 rs9423647                                                                   |
| 500 | genus.Barnesiella.id.944             | Forced expiratory volume in 1-second (FEV1), predicted percentage | mz9jd0 | QoRiKP | 0  | 0.92259649094386 0.886838364160828 0.864560729902554 0.844598986511219 0.62345576114292 0.865756579848929 0.437618057807527 0.839834733939951 0.929892127993634 0.747372865011957 0.906955628026025 0.932187126833256 0.746287673430912 0.771992040869969                                                        | rs11155559 rs113258194 rs12909713 rs13242616 rs199035 rs2276875 rs2428166 rs35177866 rs60316894 rs62251337 rs72684847 rs76181748 rs77455852 rs79795328                               |
| 501 | class.Deltaproteobacteria.id.3087    | Forced expiratory volume in 1-second (FEV1), predicted percentage | n3j0op | QoRiKP | 4  | 0.133642204668397 0.198596553839642 0.0586124251125096 0.0385628968536346 0.061193376507703 0.140346566829633 0.0494868023057559 0.0796386929789547 0.0393494226666822 0.129271123602302 0.015576122783025 0.086612917760217 0.121573615091621                                                                   | rs1035691 rs112381107 rs11599763 rs17084793 rs17791387 rs2692012 rs2838334 rs3935584 rs4506934 rs55744759 rs6058181 rs62020470 rs9928243                                             |
| 502 | family.Lachnospiraceae.id.1987       | Forced expiratory volume in 1-second (FEV1), predicted percentage | nFIAu5 | QoRiKP | 0  | 0.1849555854664 0.129006028615757 0.155615501208895 0.156293073193595 0.132673750774658 0.0924777116442365 0.168562863397748 0.203254747687617 0.0545966351945606 0.263219950535225 0.29242677928398 0.193790437347072 0.093252330182377 0.204416506798433 0.092821520203183 0.0631554101995752 0.10483866786025 | rs10402491 rs11139361 rs112040820 rs11841382 rs11979110 rs1205443 rs12760724 rs13005175 rs146660815 rs2159863 rs2910921 rs3127230 rs35524804 rs7359994 rs79086868 rs959845 rs9929145 |
| 503 | genus.Peptococcus.id.2037            | Forced expiratory volume in 1-second (FEV1), predicted percentage | nlesEv | QoRiKP | 0  | 0.72066315787384 0.655928200647581 0.675731328157227 0.462843675781372 0.744933737166652 0.792483835315868 0.614375943456497 0.850786551053085 0.615328631409521 0.989501151701178 0.837639158411248 0.717302024454985                                                                                           | rs10031059 rs11001941 rs12069354 rs2054133 rs36121075 rs413827 rs5770862 rs6918730 rs7033353 rs72850165 rs74592222 rs77681628                                                        |

|     | A                                             | B                                                                 | C      | D      | E  | F                                                                                                                                                                                                                                                                                                                                                                     | G                                                                                                                                                                                                                   |
|-----|-----------------------------------------------|-------------------------------------------------------------------|--------|--------|----|-----------------------------------------------------------------------------------------------------------------------------------------------------------------------------------------------------------------------------------------------------------------------------------------------------------------------------------------------------------------------|---------------------------------------------------------------------------------------------------------------------------------------------------------------------------------------------------------------------|
| 504 | order.Methanobacteriales.id.120               | Forced expiratory volume in 1-second (FEV1), predicted percentage | NKNDGp | QoRiKP | 0  | 0.635151424543404 0.311568884883246 0.774634806315217 0.821878372278675 0.907553008559156 0.965311004993295 0.93324360363905 0.990448313468905                                                                                                                                                                                                                        | rs10424197 rs4257531 rs56131665 rs6508769 rs6776814 rs73068003 rs73457410 rs894996                                                                                                                                  |
| 505 | genus..Eubacteriumoxidoreducensgroup.id.11339 | Forced expiratory volume in 1-second (FEV1), predicted percentage | nnD7ru | QoRiKP | 0  | 0.607697317259706 0.703937392020414 0.76218008806738 0.522699160893423 0.817206896395282                                                                                                                                                                                                                                                                              | rs12129908 rs12423772 rs2973294 rs34561138 rs440215                                                                                                                                                                 |
| 506 | genus.FamilyXIIID3011group.id.11293           | Forced expiratory volume in 1-second (FEV1), predicted percentage | NqdTjG | QoRiKP | 0  | 0.408660835984306 0.224734238132527 0.210217966282463 0.627726006932448 0.366716669049888 0.444215219256366 0.283227581410122 0.422738401755842 0.171998536866096 0.298418514392528 0.130081215867961                                                                                                                                                                 | rs11126423 rs11736617 rs12812672 rs149302 rs16840310 rs16940167 rs17156849 rs62029761 rs62200412 rs72730932 rs9837139                                                                                               |
| 507 | class.Lentisphaeria.id.2250                   | Forced expiratory volume in 1-second (FEV1), predicted percentage | nQHoYD | QoRiKP | 0  | 0.596051756676624 0.260339294380244 0.367425135501982 0.182750427636182 0.411087645240131 0.848129639665515 0.776729685735216 0.362369786849859                                                                                                                                                                                                                       | rs1002941 rs11770843 rs17114848 rs2031282 rs2825714 rs62570196 rs72640280 rs77599476                                                                                                                                |
| 508 | class.Mollicutes.id.3920                      | Forced expiratory volume in 1-second (FEV1), predicted percentage | nRNBx9 | QoRiKP | 0  | 0.886773015616313 0.565856100758418 0.802582654162321 0.58206913199811 0.64660346449681 0.87477870890334 0.618689087317084 0.665594251034905 0.988915624198383 0.990367636714001 0.616636056619754 0.872957549815072                                                                                                                                                  | rs10108398 rs11890098 rs12566890 rs17214486 rs2464826 rs28537087 rs3768491 rs4885016 rs6043847 rs72901605 rs74603314 rs78169027                                                                                     |
| 509 | family.Bacteroidaceae.id.917                  | Forced expiratory volume in 1-second (FEV1), predicted percentage | O0n2Pz | QoRiKP | 0  | 0.372471384669061 0.299425050878798 0.5486224573197 0.183532302015531 0.406761669319987 0.354297672791807 0.39077125297088 0.39713620932562 0.360805672699653                                                                                                                                                                                                         | rs11585893 rs13207588 rs1340391 rs17619981 rs2023437 rs66474973 rs66710942 rs6795673 rs9507307                                                                                                                      |
| 510 | family.Veillonellaceae.id.2172                | Forced expiratory volume in 1-second (FEV1), predicted percentage | obtxsV | QoRiKP | 0  | 0.340662619202697 0.504772809319139 0.305952099357511 0.366874308888692 0.177009458828223 0.453613000168407 0.283221096724522 0.505724261726909 0.150184733653586 0.31227655829645 0.248417009881231 0.308469375900487 0.245564982253485 0.119025688021341 0.253576670828092 0.308900557016721 0.331288299089958 0.425486512130063 0.375149390617966                  | rs111810795 rs114889439 rs11700976 rs12186441 rs12668619 rs12741784 rs1442060 rs1693340 rs2175069 rs2561116 rs2585520 rs4263802 rs4461038 rs4797169 rs61264131 rs6692542 rs6909981 rs79535861 rs9345168             |
| 511 | phylum.Bacteroidetes.id.905                   | Forced expiratory volume in 1-second (FEV1), predicted percentage | oChqj7 | QoRiKP | 0  | 0.979493879341647 0.765393345304453 0.852302249264093 0.753685352139108 0.926614218124079 0.570734677190281 0.629867835640679 0.885282041956034 0.469441192311258                                                                                                                                                                                                     | rs111845179 rs2032750 rs62531359 rs6586324 rs73512608 rs73846128 rs73975615 rs7999780 rs929878                                                                                                                      |
| 512 | order.Coriobacteriales.id.810                 | Forced expiratory volume in 1-second (FEV1), predicted percentage | oGD8An | QoRiKP | 0  | 0.648672353616368 0.563764943328612 0.713913920398196 0.785908040599452 0.972032731090753 0.362903190781537 0.755497501622904 0.960537647436087 0.664810970342217 0.62462952055733 0.791659900356306 0.82666833133805 0.668900824714695 0.520827182213513                                                                                                             | rs11073596 rs11250875 rs11656361 rs12974142 rs13307134 rs1397793 rs1816223 rs240104 rs2442778 rs3025411 rs34739816 rs67561917 rs719099 rs8010111                                                                    |
| 513 | genus.RuminococcaceaeUCG002.id.11360          | Forced expiratory volume in 1-second (FEV1), predicted percentage | OhSZ6N | QoRiKP | 0  | 0.718736720927513 0.764191967348006 0.747323210338015 0.876302031494826 0.859544521649987 0.449771170528197 0.692115024252366 0.555076910971194 0.709466394028829 0.756165437617935 0.667751615418891 0.639641944115331 0.808390066261227 0.964322731029941 0.85758805461143 0.82710745104117 0.994138119122018 0.700315941416934 0.937047508347475 0.781032833500872 | rs10916131 rs10927423 rs10964441 rs113147300 rs11607472 rs116974815 rs12463378 rs15256 rs55793120 rs56030423 rs57079348 rs6542556 rs6793778 rs7120052 rs7155595 rs7342369 rs76847269 rs77564310 rs79016051 rs882348 |
| 514 | genus..Eubacteriumnodatumgroup.id.11297       | Forced expiratory volume in 1-second (FEV1), predicted percentage | oDISu  | QoRiKP | 0  | 0.736726283283474 0.539798681659396 0.43119305750051 0.953867117045031 0.627237206444417 0.705377743102557 0.936399508016163 0.87915258410108 0.490692295475851 0.826762562938366 0.36127147831414                                                                                                                                                                    | rs10263623 rs10458299 rs11006576 rs113893692 rs34297067 rs61841040 rs6818880 rs77910827 rs7827125 rs7880204 rs9425984                                                                                               |
| 515 | genus.Alloprevotella.id.961                   | Forced expiratory volume in 1-second (FEV1), predicted percentage | OtCSo3 | QoRiKP | 0  | 0.463699150020738 0.21723209798579 0.472881703539735 0.374418360468488 0.950500139654476 0.347400147522215                                                                                                                                                                                                                                                            | rs12675596 rs2154444 rs34619204 rs4364940 rs4680035 rs58212166                                                                                                                                                      |
| 516 | family.Peptostreptococcaceae.id.2042          | Forced expiratory volume in 1-second (FEV1), predicted percentage | oU56W6 | QoRiKP | 0  | 0.403664386735601 0.324872189229966 0.322677824899897 0.252017656712991 0.381766919738623 0.405525354919819 0.534763169643746 0.305945137584729 0.360460411965425 0.450967612848032 0.354845482833008 0.434228971006237 0.503362633421996                                                                                                                             | rs117020988 rs12377846 rs12986312 rs1467258 rs1520207 rs4692811 rs59865771 rs59987323 rs61841503 rs6721459 rs76982728 rs77540684 rs9573937                                                                          |
| 517 | order.Clostridiales.id.1863                   | Forced expiratory volume in 1-second (FEV1), predicted percentage | Oxkiqb | QoRiKP | 13 | 0.00169882942609081 0.0352241786826455 0.0279902131620834 0.0449665822696437 0.0212760218094826 0.00554072168900823 0.0308130180573296 0.041621716020326 0.0458025098455605 0.0149657649264474 0.0165015212046669 0.0131300505152261 0.0391957886416362                                                                                                               | rs10774377 rs112334273 rs13105690 rs13179700 rs1842454 rs2273429 rs290772 rs6442336 rs6814436 rs6815608 rs72738886 rs72915163 rs76767978                                                                            |
| 518 | genus..Eubacteriumhalliigroup.id.11338        | Forced expiratory volume in 1-second (FEV1), predicted percentage | P9709V | QoRiKP | 0  | 0.730422528439795 0.989572165321332 0.979861977584489 0.677209969477582 0.940056737017829 0.794765378657019 0.859621965377636 0.883262501418804 0.783717902774586 0.43248649752472 0.769189747249501 0.83244731624536 0.495560581259191 0.829409598637457 0.889305186585925 0.804850499016275                                                                         | rs10501370 rs10798999 rs10808115 rs117748144 rs13116360 rs138531890 rs17074066 rs17474256 rs281379 rs28584818 rs60254196 rs630939 rs6550770 rs74018587 rs78056098 rs949971                                          |

|     | A                                            | B                                                                 | C      | D      | E  | F                                                                                                                                                                                                                                                        | G                                                                                                                                              |
|-----|----------------------------------------------|-------------------------------------------------------------------|--------|--------|----|----------------------------------------------------------------------------------------------------------------------------------------------------------------------------------------------------------------------------------------------------------|------------------------------------------------------------------------------------------------------------------------------------------------|
| 519 | phylum.Cyanobacteria.id.1500                 | Forced expiratory volume in 1-second (FEV1), predicted percentage | PcT6eJ | QoRiKP | 0  | 0.303187928581261 0.765918326931142 0.326801497166725 0.806124559591375 0.610818454983429 0.913349638305893 0.431519925221361 0.528428004696759                                                                                                          | rs12555298 rs2585223 rs584122 rs61972390 rs7148504 rs76531781 rs789068 rs9864379                                                               |
| 520 | genus.Phascolarctobacterium.id.2168          | Forced expiratory volume in 1-second (FEV1), predicted percentage | pCXx5P | QoRiKP | 0  | 0.616714423855077 0.861197025463656 0.392409849775371 0.683268837813285 0.864730491118951 0.510008986111795 0.576295274583634 0.69907877419917 0.464258658915953 0.87404017155317                                                                        | rs11929846 rs12618201 rs1264476 rs28525131 rs56069061 rs56157888 rs74540770 rs74847270 rs75882962 rs7982713                                    |
| 521 | genus.LachnospiraceaeUCG008.id.11328         | Forced expiratory volume in 1-second (FEV1), predicted percentage | PGIGHi | QoRiKP | 0  | 0.726818401309987 0.613522190873791 0.643594524237512 0.809241411484328 0.733695930462996 0.910091659020708 0.805263354500803 0.926416673644403 0.931306160805253 0.902722256501139                                                                      | rs10741777 rs10793103 rs10801803 rs13024781 rs57254474 rs61944774 rs62277846 rs67078837 rs75356640 rs955844                                    |
| 522 | family.Acidaminococcaceae.id.2166            | Forced expiratory volume in 1-second (FEV1), predicted percentage | pXAgfu | QoRiKP | 0  | 0.388411545535109 0.186662317445356 0.982114299072955 0.667006764164828 0.558785928563804 0.45232324157962 0.277066437154825                                                                                                                             | rs262812 rs2933324 rs45497800 rs6589457 rs6923842 rs74540770 rs78702810                                                                        |
| 523 | genus.Lactobacillus.id.1837                  | Forced expiratory volume in 1-second (FEV1), predicted percentage | q1bO5E | QoRiKP | 0  | 0.53623673905113 0.685044745401121 0.396696747073213 0.301032067092581 0.310068634407253 0.133512601275638 0.813704430670235                                                                                                                             | rs11674854 rs16861661 rs62314653 rs75127669 rs768253 rs77478751 rs921925                                                                       |
| 524 | genus.Methanobrevibacter.id.123              | Forced expiratory volume in 1-second (FEV1), predicted percentage | Q3dvBY | QoRiKP | 0  | 0.898695396635408 0.401863950581135 0.168760006864392 0.463614170738404 0.250402417331073                                                                                                                                                                | rs1334944 rs4802933 rs6776814 rs76029318 rs894996                                                                                              |
| 525 | genus.Intestinibacter.id.11345               | Forced expiratory volume in 1-second (FEV1), predicted percentage | Q46NVk | QoRiKP | 0  | 0.57012103530747 0.711461469546854 0.366364465405989 0.660502723882911 0.738970675065739 0.343579812020796 0.484488624649773 0.581855329381902 0.812962996008757 0.697446565037649 0.431321717805373 0.73932029545104 0.88089267106571 0.671575086119971 | rs11109097 rs118030283 rs16938435 rs2098844 rs2702387 rs4327025 rs447950 rs478972 rs6062862 rs62430350 rs68093214 rs6875660 rs893394 rs9348442 |
| 526 | genus..Ruminococcustorquesgroup.id.14377     | Forced expiratory volume in 1-second (FEV1), predicted percentage | qE3Gq8 | QoRiKP | 0  | 0.842471251395245 0.768606971305999 0.83457340748301 0.88228419139058 0.643705150550768 0.8357088464872 0.778259744350988 0.727030448320565 0.951481305275619                                                                                            | rs10904297 rs10967781 rs12434631 rs1475330 rs35866622 rs4073731 rs77034621 rs8080469 rs8141465                                                 |
| 527 | genus.Victivallis.id.2256                    | Forced expiratory volume in 1-second (FEV1), predicted percentage | qENaOR | QoRiKP | 0  | 0.242231799435428 0.542677893849964 0.265381365388454 0.461901721615673 0.820250824329412 0.795217978666912 0.465976454282462 0.725455869560533 0.535981192117813 0.342929360820094                                                                      | rs11899949 rs12512543 rs173120 rs1882775 rs2546432 rs342302 rs4764863 rs4895919 rs56349194 rs911666                                            |
| 528 | genus.Haemophilus.id.3698                    | Forced expiratory volume in 1-second (FEV1), predicted percentage | QGrGNV | QoRiKP | 0  | 0.325729379857526 0.0564946852112809 0.385655662942869 0.0637901724543285 0.445213751572799 0.38505274869236 0.203681246602463 0.188382100099253 0.376137958780695                                                                                       | rs10781340 rs111582866 rs35509 rs4822728 rs76022354 rs78909003 rs9328464 rs9382510 rs9895850                                                   |
| 529 | order.Selenomonadales.id.2165                | Forced expiratory volume in 1-second (FEV1), predicted percentage | qiWbrh | QoRiKP | 11 | 0.00104318401880359 0.0233178453518447 0.013697655054976 0.00450387504392665 0.00371438820386536 0.0116027405959215 0.02010594179417 0.0177195076356917 0.0256807117338235 0.00497237341424336 0.0173080788711653                                        | rs13086907 rs1643968 rs1649999 rs2834062 rs4463806 rs4722181 rs60274479 rs61249479 rs71405394 rs73232831 rs9423647                             |
| 530 | genus.LachnospiraceaeFCS020group.id.11314    | Forced expiratory volume in 1-second (FEV1), predicted percentage | QjakFr | QoRiKP | 0  | 0.637821289422579 0.904054356521201 0.53901401441722 0.709103095935936 0.641850321225781 0.947653460297771 0.680712602220768 0.838660626745132 0.847947976573293 0.988129526067754 0.986262494663321 0.953347216474344                                   | rs10093861 rs1254846 rs1363769 rs2322265 rs2862811 rs35035870 rs3999074 rs4452603 rs7249113 rs72793667 rs9308097 rs9788306                     |
| 531 | genus..Eubacteriumxylanophilumgroup.id.14375 | Forced expiratory volume in 1-second (FEV1), predicted percentage | Qyd7XB | QoRiKP | 0  | 0.877148640554296 0.927032372972136 0.95851359337276 0.765153617760159 0.503833350444205 0.661406853755147 0.338790323461789 0.631802404672793 0.251143668312766                                                                                         | rs10140184 rs10917203 rs112176119 rs13239072 rs17830032 rs1999224 rs2012708 rs2213117 rs75586835                                               |
| 532 | genus..Ruminococcusgnavusgroup.id.14376      | Forced expiratory volume in 1-second (FEV1), predicted percentage | R6RQXL | QoRiKP | 0  | 0.666166920109302 0.901065132396857 0.953835012564669 0.719602500364467 0.759134291414032 0.976538982684402 0.838899153055956 0.71443549637968 0.443511380798299 0.753915794110543 0.844137662280534                                                     | rs11597105 rs11864644 rs12136548 rs12989336 rs13163520 rs2909242 rs3124783 rs4388134 rs62167033 rs78399089 rs9872758                           |
| 533 | genus.RuminococcaceaeUCG011.id.11368         | Forced expiratory volume in 1-second (FEV1), predicted percentage | R7oLoV | QoRiKP | 0  | 0.173548521953685 0.357183329490373 0.671501373086161 0.436243684234635 0.153672670331176 0.340964138502544 0.37650571692779                                                                                                                             | rs10274562 rs12724320 rs1416041 rs2729556 rs4490371 rs79113084 rs9729514                                                                       |
| 534 | genus.Bifidobacterium.id.436                 | Forced expiratory volume in 1-second (FEV1), predicted percentage | RKITkD | QoRiKP | 0  | 0.938619582703311 0.973380414845941 0.865506257472292 0.971051469988754 0.711367848718506 0.502789502114094 0.526877083063205 0.763289926486288 0.959340525744274 0.839255344108149 0.959967980102491                                                    | rs12022129 rs2491158 rs2686790 rs540489 rs55888705 rs56108664 rs5746486 rs62181700 rs73797465 rs75344046 rs857444                              |

|     | A                                                 | B                                                                 | C      | D      | E | F                                                                                                                                                                                                                                                          | G                                                                                                                                                |
|-----|---------------------------------------------------|-------------------------------------------------------------------|--------|--------|---|------------------------------------------------------------------------------------------------------------------------------------------------------------------------------------------------------------------------------------------------------------|--------------------------------------------------------------------------------------------------------------------------------------------------|
| 535 | genus..Eubacteriumcoprostanoligenesgroup.id.11375 | Forced expiratory volume in 1-second (FEV1), predicted percentage | rlb7o5 | QoRiKP | 0 | 0.544669821855167 0.842760942445414 0.545034116232136 0.182379452131615 0.619903472657858 0.540696230301019 0.593534630772946 0.332102254627762 0.516425604004772 0.725185927924205 0.378107154033769 0.463434401845007 0.889759599461508                  | rs1020520 rs10444197 rs11052069 rs11720857 rs12906958 rs17159861 rs2644213 rs4076415 rs62024432 rs6762473 rs76898927 rs79895140 rs9648214        |
| 536 | genus.Ruminidostridium9.id.11357                  | Forced expiratory volume in 1-second (FEV1), predicted percentage | RmoHnu | QoRiKP | 0 | 0.672452251827606 0.411148466952168 0.717394335922904 0.464872763003808 0.370491609017586 0.312735054133124 0.28722639728788 0.690620908226081 0.353410938841629                                                                                           | rs115044523 rs12040548 rs6082461 rs7137760 rs74303178 rs78191726 rs918449 rs9522712 rs9809789                                                    |
| 537 | order.MollicutesRF9.id.11579                      | Forced expiratory volume in 1-second (FEV1), predicted percentage | rsbOlb | QoRiKP | 0 | 0.668406412124614 0.160802366385246 0.598658810701744 0.765827679351003 0.220119840114112 0.671261387702002 0.690877241818425 0.680124773739277 0.483674443005308 0.542584076879079 0.798010561484854 0.556578747407106 0.608899344969827                  | rs11779863 rs12566890 rs13100746 rs17235252 rs3932485 rs515984 rs638542 rs74603314 rs76373661 rs7706512 rs7801843 rs7853673 rs949341             |
| 538 | genus..Eubacteriumbrachygroup.id.11296            | Forced expiratory volume in 1-second (FEV1), predicted percentage | Rv99Lm | QoRiKP | 0 | 0.49561899473806 0.223335803412696 0.480070429721182 0.630206905470025 0.201869072849372 0.385041581999494 0.405738879793871 0.345651400689859 0.206576726871777 0.116020071062872                                                                         | rs112617308 rs12151423 rs13139592 rs1384962 rs2913110 rs4862235 rs62348779 rs6591893 rs720439 rs73199919                                         |
| 539 | genus.Howardella.id.2000                          | Forced expiratory volume in 1-second (FEV1), predicted percentage | sF7W2L | QoRiKP | 0 | 0.263868318150303 0.133668320775127 0.0951451907276129 0.16310235210025 0.16073618673411 0.304925816041298 0.0794828309911532 0.23600307881063 0.0612935880822958 0.132321321808273                                                                        | rs10048062 rs12452946 rs1484873 rs17167098 rs2154047 rs36081916 rs3791893 rs609430 rs672217 rs901099                                             |
| 540 | order.Burkholderiales.id.2874                     | Forced expiratory volume in 1-second (FEV1), predicted percentage | sFxDb3 | QoRiKP | 0 | 0.221468613706478 0.16790933931814 0.161494501442416 0.13267837327702 0.32485164375977 0.146162152939688 0.193773151591681 0.133981417541159 0.373511184463611 0.0701778370631478                                                                          | rs1511453 rs1928341 rs2321387 rs2613606 rs4033856 rs6087811 rs62395635 rs75242906 rs7638039 rs9964679                                            |
| 541 | family.Victivallaceae.id.2255                     | Forced expiratory volume in 1-second (FEV1), predicted percentage | SgvOJ4 | QoRiKP | 0 | 0.938091951329233 0.66269796376084 0.68851941470131 0.787211301864427 0.671695316716012 0.389380016284427 0.833916442962818 0.51260576292634 0.742277063606178 0.816783933380869 0.754911416757388 0.526032677215264                                       | rs11671100 rs11764871 rs2944282 rs34962571 rs4396289 rs61702987 rs62570196 rs6545794 rs67832247 rs7077363 rs7314815 rs7627405                    |
| 542 | family.Porphyromonadaceae.id.943                  | Forced expiratory volume in 1-second (FEV1), predicted percentage | SpO9Ka | QoRiKP | 0 | 0.609798448305072 0.308169469247591 0.592030216665923 0.344816182659575 0.780195866115288 0.660970370508463 0.917281695319922 0.744073810111144 0.27771515366573                                                                                           | rs10762312 rs10858364 rs17065783 rs1980561 rs35233670 rs35961441 rs6953849 rs7330827 rs864093                                                    |
| 543 | order.Rhodospirillales.id.2667                    | Forced expiratory volume in 1-second (FEV1), predicted percentage | staWrf | QoRiKP | 2 | 0.21400462658376 0.0424251784978843 0.0936596677910397 0.0269982604150095 0.178097813566962 0.207555296239551 0.197656901003024 0.156325566822271 0.120999832225974 0.14390281532475 0.213050593421027 0.068673102304463 0.141871141057774                 | rs1035406 rs11591293 rs11630875 rs1549633 rs3730086 rs3754624 rs4278423 rs55876211 rs61933850 rs7001029 rs76784716 rs77304857 rs9813022          |
| 544 | class.Coriobacteriia.id.809                       | Forced expiratory volume in 1-second (FEV1), predicted percentage | szt6bn | QoRiKP | 0 | 0.648672353616368 0.563764943328612 0.713913920398196 0.785908040599452 0.972032731090753 0.362903190781537 0.755497501622904 0.960537647436087 0.664810970342217 0.62462952055733 0.791659900356306 0.82666833133805 0.668900824714695 0.520827182213513  | rs11073596 rs11250875 rs11656361 rs12974142 rs13307134 rs1397793 rs1816223 rs240104 rs2442778 rs3025411 rs34739816 rs67561917 rs719099 rs8010111 |
| 545 | family.Oxalobacteraceae.id.2966                   | Forced expiratory volume in 1-second (FEV1), predicted percentage | T35lgz | QoRiKP | 0 | 0.808842655208313 0.470091100692273 0.981751803978533 0.928419643958742 0.816721339079989 0.997340641749313 0.86672260187036 0.881105791424022 0.900078931907278 0.871555126302368 0.953882077148292 0.917952692841673 0.553261418768015 0.875779377692075 | rs111966731 rs11246212 rs12002250 rs1569853 rs17138946 rs36057338 rs4428215 rs561239 rs6000536 rs62435498 rs736744 rs7993559 rs80330081 rs934049 |
| 546 | family.Peptococcaceae.id.2024                     | Forced expiratory volume in 1-second (FEV1), predicted percentage | T8T6Lu | QoRiKP | 1 | 0.0199064240428036 0.253787987321598 0.373050265601591 0.421859798682239 0.230971643241562 0.417417208673125 0.213084142330439 0.186316425486477 0.374558554486234                                                                                         | rs117452796 rs12144792 rs12634826 rs12992764 rs150600492 rs35703006 rs4990837 rs75430375 rs75898026                                              |
| 547 | genus.ChristensenellaceaeR.7group.id.11283        | Forced expiratory volume in 1-second (FEV1), predicted percentage | tbXTaX | QoRiKP | 0 | 0.997376599586305 0.432551611529667 0.319791469064918 0.424496928849201 0.505938029392241 0.464771978493435 0.75382599854088 0.542459952055957 0.754945457087582 0.336402273057983                                                                         | rs10461257 rs17081797 rs60954665 rs62132810 rs62190261 rs62467127 rs73952017 rs78521377 rs79150079 rs892686                                      |
| 548 | genus..Eubacteriumfissicatenagroup.id.14373       | Forced expiratory volume in 1-second (FEV1), predicted percentage | TGrzdF | QoRiKP | 0 | 0.512676627094579 0.715284663863328 0.401186553328151 0.480126159679141 0.713645223407183 0.956416343140372 0.720095297273442 0.106579069080435                                                                                                            | rs11818408 rs11876297 rs151257695 rs1768152 rs2733072 rs3771393 rs6934739 rs7104872                                                              |
| 549 | genus.Slackia.id.825                              | Forced expiratory volume in 1-second (FEV1), predicted percentage | tkl5vG | QoRiKP | 0 | 0.485412099420951 0.910529374396942 0.467391299321284 0.594411168087617 0.412936031205049 0.29903818822793                                                                                                                                                 | rs10409783 rs12440440 rs16894137 rs35156985 rs4492265 rs8901                                                                                     |
| 550 | genus.RuminococcaceaeUCG004.id.11362              | Forced expiratory volume in 1-second (FEV1), predicted percentage | TIODZI | QoRiKP | 0 | 0.408791940388644 0.615555211612494 0.762109942936903 0.138990399390141 0.872902683738244 0.515389953149039 0.343024093529631 0.480534314327411 0.70593772514847                                                                                           | rs10976229 rs11961899 rs12125734 rs2248146 rs3800154 rs511258 rs6769553 rs7569771 rs9818949                                                      |

|     | A                                         | B                                                                 | C      | D      | E | F                                                                                                                                                                                                                                                                         | G                                                                                                                                                             |
|-----|-------------------------------------------|-------------------------------------------------------------------|--------|--------|---|---------------------------------------------------------------------------------------------------------------------------------------------------------------------------------------------------------------------------------------------------------------------------|---------------------------------------------------------------------------------------------------------------------------------------------------------------|
| 551 | genus.LachnospiraceaeUCG004.id.11324      | Forced expiratory volume in 1-second (FEV1), predicted percentage | TQSPiB | QoRiKP | 0 | 0.160076006344729 0.860747930645774 0.834963401179169 0.759931594852216 0.923772532956176 0.702894028629708 0.382261578755611 0.741237132242034 0.811686742739605 0.95976042245112 0.812251396613299                                                                      | rs11128180 rs12072562 rs12673420 rs12747809 rs12894272 rs233486 rs2726805 rs2882478 rs35182105 rs6656451 rs7629954                                            |
| 552 | order.Bacteroidales.id.913                | Forced expiratory volume in 1-second (FEV1), predicted percentage | tSliO9 | QoRiKP | 0 | 0.634108344314535 0.403148365019697 0.557397498118685 0.624252892955006 0.21703113932362 0.437120747565419 0.275068412305285 0.66038263017962 0.686042776138126 0.844082085444699 0.793263062187879                                                                       | rs11146701 rs111845179 rs2032750 rs4146051 rs4916508 rs55773148 rs62531359 rs73975615 rs7631304 rs79585701 rs929878                                           |
| 553 | genus.LachnospiraceaeNC2004group.id.11316 | Forced expiratory volume in 1-second (FEV1), predicted percentage | TUj4LC | QoRiKP | 0 | 0.897487194000841 0.857380119736772 0.889753365177047 0.867617782247858 0.842378115441 0.906914670911274 0.619275370382877 0.839097780388703 0.309558997662013                                                                                                            | rs117467633 rs12127733 rs12208226 rs12863463 rs17067076 rs1928659 rs1929743 rs3756315 rs6116753                                                               |
| 554 | order.Bacillales.id.1674                  | Forced expiratory volume in 1-second (FEV1), predicted percentage | uCOF7P | QoRiKP | 1 | 0.0959938056375644 0.021658759504835 0.196853343640164 0.184553409825739 0.0569357906867953 0.0744454094438994 0.0780110405496366 0.225421833912159                                                                                                                       | rs10410917 rs11034576 rs11207728 rs11844714 rs1287018 rs4617108 rs62640857 rs74420793                                                                         |
| 555 | genus.Akkermansia.id.4037                 | Forced expiratory volume in 1-second (FEV1), predicted percentage | uHEy8Q | QoRiKP | 0 | 0.229540141831949 0.14470045969305 0.26711819612844 0.0705548389320932 0.12559158490427 0.303192805007071 0.352566533112766 0.369829422442725 0.43507889782224 0.47398251809949 0.27799630814365                                                                          | rs111862613 rs117107102 rs11729256 rs12908520 rs2602429 rs4242783 rs4936098 rs61779207 rs74542928 rs9349825 rs941682                                          |
| 556 | genus.Parabacteroides.id.954              | Forced expiratory volume in 1-second (FEV1), predicted percentage | uQYGEB | QoRiKP | 0 | 0.997268071037798 0.397345583883503 0.535303789522719 0.608672615918874 0.202915167223639 0.456719592575734                                                                                                                                                               | rs114567323 rs115602804 rs4236095 rs60884758 rs6657302 rs7298818                                                                                              |
| 557 | class.Verrucomicrobiae.id.4029            | Forced expiratory volume in 1-second (FEV1), predicted percentage | UsMxlz | QoRiKP | 0 | 0.231093588438149 0.145499372363579 0.268522599496624 0.0709749829388303 0.12625633323527 0.304864508016045 0.354176051737731 0.371151886643276 0.436039788455486 0.476745023722901 0.279396464089776                                                                     | rs111862613 rs117107102 rs11729256 rs12908520 rs2602429 rs4242783 rs4936098 rs61779207 rs74542928 rs9349825 rs941682                                          |
| 558 | class.Bacteroidia.id.912                  | Forced expiratory volume in 1-second (FEV1), predicted percentage | UTPK2n | QoRiKP | 0 | 0.634108344314535 0.403148365019697 0.557397498118685 0.624252892955006 0.21703113932362 0.437120747565419 0.275068412305285 0.66038263017962 0.686042776138126 0.844082085444699 0.793263062187879                                                                       | rs11146701 rs111845179 rs2032750 rs4146051 rs4916508 rs55773148 rs62531359 rs73975615 rs7631304 rs79585701 rs929878                                           |
| 559 | genus.Butyrivibrio.id.1993                | Forced expiratory volume in 1-second (FEV1), predicted percentage | UYJxH8 | QoRiKP | 0 | 0.237279456049456 0.500662421854164 0.357965489185898 0.130123034847044 0.36709517361567 0.287295425564516 0.235057833477576 0.1850971666952 0.325368107302109 0.215854996606954 0.510765014473862 0.304023673056665 0.448837650267707 0.21338853384335 0.171320206110529 | rs1007475 rs11761679 rs142855850 rs16934069 rs16941336 rs17163238 rs4537857 rs486484 rs4928024 rs72723662 rs74622183 rs77356209 rs7752361 rs7763512 rs9349693 |
| 560 | genus.Bacteroides.id.918                  | Forced expiratory volume in 1-second (FEV1), predicted percentage | Vd8Fsi | QoRiKP | 0 | 0.372471384669061 0.299425050878798 0.5486224573197 0.183532302015531 0.406761669319987 0.354297672791807 0.39077125297088 0.39713620932562 0.360805672699653                                                                                                             | rs11585893 rs13207588 rs1340391 rs17619981 rs2023437 rs66474973 rs66710942 rs6795673 rs9507307                                                                |
| 561 | family.Ruminococcaceae.id.2050            | Forced expiratory volume in 1-second (FEV1), predicted percentage | vlyGOP | QoRiKP | 0 | 0.845885345279585 0.75527940321064 0.906284364383876 0.65992723489165 0.993325458513158 0.944951381591928 0.843185796102708 0.968861585489068 0.722098172971538 0.436307389109358                                                                                         | rs10093275 rs10166469 rs1158100 rs1612733 rs17376049 rs2113833 rs3009418 rs55793120 rs56199908 rs76724913                                                     |
| 562 | genus.Olsenella.id.822                    | Forced expiratory volume in 1-second (FEV1), predicted percentage | W49loY | QoRiKP | 0 | 0.652572753086363 0.684784681988555 0.275177233685508 0.265214691545607 0.747103989665362 0.624262190797875 0.303467222602498 0.677048742757885 0.617855986725624 0.89339254031485 0.725732266012525                                                                      | rs1035588 rs17148768 rs2759329 rs35225860 rs6046522 rs61090148 rs62112538 rs72691585 rs7540303 rs8066522 rs9460691                                            |
| 563 | genus.Romboutsia.id.11347                 | Forced expiratory volume in 1-second (FEV1), predicted percentage | w5yhuV | QoRiKP | 0 | 0.718155101657205 0.803296942535714 0.628070632399703 0.915027134746847 0.390710637521931 0.785548220216274 0.433204381869329 0.927226057943666 0.82032338368392 0.885018666215859 0.765961289485726 0.833187461623716 0.892519598870569                                  | rs10279978 rs11221428 rs16843578 rs28603357 rs34302036 rs61841503 rs62504452 rs7109293 rs75200530 rs75987356 rs77702691 rs9389266 rs9567264                   |
| 564 | genus.Desulfovibrio.id.3173               | Forced expiratory volume in 1-second (FEV1), predicted percentage | WaNFee | QoRiKP | 0 | 0.548667963798303 0.414485194428002 0.623268401188315 0.520981114668869 0.955351554499036 0.883060602340947 0.574423228721674 0.419776904384105 0.896173571395114 0.781283328725594                                                                                       | rs12031543 rs13066142 rs16863365 rs2032031 rs2590913 rs2853179 rs4797774 rs6580353 rs72647089 rs7729080                                                       |
| 565 | genus.Anaerofilum.id.2053                 | Forced expiratory volume in 1-second (FEV1), predicted percentage | WcT5pC | QoRiKP | 0 | 0.654287546304626 0.922038281661094 0.969920047526874 0.775038150820086 0.991168801590487 0.639027944352033 0.694407570139113 0.985278411441924 0.414905253878152 0.787000622143154 0.728350362022799                                                                     | rs10794359 rs1563175 rs17012738 rs17096874 rs356049 rs4244069 rs4506496 rs712981 rs79598899 rs816292 rs9299345                                                |
| 566 | family.Alcaligenaceae.id.2875             | Forced expiratory volume in 1-second (FEV1), predicted percentage | WEMGli | QoRiKP | 1 | 0.083649823300261 0.111047371919958 0.0784397733368353 0.122164261696878 0.192398479853548 0.107543992454777 0.0908698041021209 0.227534483918099 0.0826851370144527 0.0256050547725005                                                                                   | rs112135816 rs1153990 rs147968 rs28480294 rs4033856 rs62395635 rs6969323 rs7638039 rs9537886 rs9964679                                                        |

|     | A                                         | B                                                                 | C       | D      | E | F                                                                                                                                                                                                                                                                                               | G                                                                                                                                                                            |
|-----|-------------------------------------------|-------------------------------------------------------------------|---------|--------|---|-------------------------------------------------------------------------------------------------------------------------------------------------------------------------------------------------------------------------------------------------------------------------------------------------|------------------------------------------------------------------------------------------------------------------------------------------------------------------------------|
| 567 | genus.Marvinbryantia.id.2005              | Forced expiratory volume in 1-second (FEV1), predicted percentage | wFbL6J  | QoRiKP | 1 | 0.303035345406499 0.179254468964963 0.170502819581217 0.29125136762334 0.337702428291428 0.233148163968519 0.0631608263695037 0.301194715073438 0.00917111036504502 0.262056611603091                                                                                                           | rs11620597 rs1187983 rs146541147 rs2724813 rs2842896 rs2863363 rs3125832 rs61884471 rs72948274 rs8006832                                                                     |
| 568 | genus.LachnospiraceaeUCG001.id.11321      | Forced expiratory volume in 1-second (FEV1), predicted percentage | wlF1Yn  | QoRiKP | 0 | 0.751502606170782 0.53206452028635 0.485512570094249 0.450869193982803 0.650105530660506 0.86230346544567 0.760277385476533 0.799453186618305 0.659374524869948 0.533166899401896 0.378854650332545 0.750149278338916 0.87214427824835                                                          | rs12131224 rs2050911 rs2371284 rs437876 rs4981345 rs573933 rs62496417 rs7341608 rs74034332 rs78848836 rs8104225 rs9403580 rs985416                                           |
| 569 | genus.Veillonella.id.2198                 | Forced expiratory volume in 1-second (FEV1), predicted percentage | wJFco0  | QoRiKP | 2 | 0.0311001562970252 0.192218468929878 0.199563473967795 0.0982499050297914 0.161330854263144 0.210004006872353 0.168457942533628 0.0134272178176908                                                                                                                                              | rs11141494 rs1882878 rs2013594 rs55807413 rs62376424 rs6656807 rs7359080 rs742016                                                                                            |
| 570 | genus.ErysipelotrichaceaeUCG003.id.11384  | Forced expiratory volume in 1-second (FEV1), predicted percentage | wn5rK2  | QoRiKP | 0 | 0.710638820002274 0.586032514192986 0.473472709089669 0.89575037733638 0.424996188348649 0.536362384156217 0.731693406804055 0.734376285778277 0.293112610515615 0.407058196925241 0.691532417721727 0.564367383196847 0.404868171689934 0.834038903228856 0.696376061217343 0.496521298517085  | rs10164067 rs11666127 rs11994308 rs12251396 rs17798136 rs28568391 rs4758231 rs59068084 rs59104037 rs62403464 rs6875357 rs73074432 rs74988980 rs75949021 rs76502207 rs8053479 |
| 571 | genus.Odoribacter.id.952                  | Forced expiratory volume in 1-second (FEV1), predicted percentage | wQYhwp  | QoRiKP | 0 | 0.360305538919042 0.432636127256184 0.850668894243898 0.101707356821385 0.739191002825292 0.518802121681306 0.539062115650158                                                                                                                                                                   | rs10093869 rs10423795 rs28417404 rs4793970 rs6856150 rs74553962 rs77779484                                                                                                   |
| 572 | genus..Eubacteriumeligensgroup.id.14372   | Forced expiratory volume in 1-second (FEV1), predicted percentage | WvdQyb  | QoRiKP | 4 | 0.0930216048866703 0.0543271942731249 0.0488647486962546 0.0236241220456325 0.0658013179801232 0.0432884347588998 0.0201143077667492                                                                                                                                                            | rs12719051 rs182318 rs2200429 rs265534 rs4583233 rs56080211 rs6923695                                                                                                        |
| 573 | class.Betaproteobacteria.id.2867          | Forced expiratory volume in 1-second (FEV1), predicted percentage | X4kHrP  | QoRiKP | 0 | 0.635981693992836 0.354571893624621 0.2844091333724 0.277504808865745 0.235577969021623 0.189348999425163 0.506708546989568 0.216115746517608 0.259607200784521 0.321963110701594 0.244136707497486 0.148052594905948                                                                           | rs11128180 rs1511453 rs1928341 rs2321387 rs2613606 rs320161 rs4033856 rs56386628 rs6087811 rs62395635 rs75242906 rs9964679                                                   |
| 574 | genus.Dialister.id.2183                   | Forced expiratory volume in 1-second (FEV1), predicted percentage | xCuklr  | QoRiKP | 0 | 0.103996576338173 0.522129432790225 0.537880786600657 0.163740221022291 0.640588448164415 0.51669487066575 0.384709309301054 0.420790777766098 0.214723068174526 0.487496196358565                                                                                                              | rs10138457 rs10938938 rs11071887 rs11166701 rs2314294 rs4747450 rs4753063 rs75416973 rs764177 rs76680460                                                                     |
| 575 | family.Pasteurellaceae.id.3689            | Forced expiratory volume in 1-second (FEV1), predicted percentage | Xtkjtja | QoRiKP | 0 | 0.270276081077765 0.125823574221038 0.273486136018032 0.172210048383828 0.414463862731829 0.126538378573928 0.270176530149556 0.441824348585956 0.370066740533988 0.469337290561027 0.41252019794246 0.235461303470782 0.392485408649001 0.117952578414316                                      | rs10965428 rs111582866 rs12050685 rs16970009 rs35510 rs4822728 rs6972479 rs72756943 rs73139353 rs76022354 rs78909003 rs9382510 rs9895850 rs9938097                           |
| 576 | genus.Intestinimonas.id.2062              | Forced expiratory volume in 1-second (FEV1), predicted percentage | XTu0EY  | QoRiKP | 0 | 0.665599788926697 0.896239038423574 0.882893332911596 0.609924035595282 0.528500279547288 0.528976715410115 0.352771799554162 0.564562357318887 0.328774848456073 0.822258332192262 0.294613247785758 0.736669755517141 0.527468848349376 0.780765253589663 0.581382374583679 0.600722814908329 | rs10262702 rs11258178 rs12226153 rs17067892 rs1859797 rs2276760 rs2731794 rs2930225 rs4113676 rs4784055 rs62240188 rs62427239 rs6934519 rs716604 rs7170984 rs9823439         |
| 577 | genus.Holdemania.id.2157                  | Forced expiratory volume in 1-second (FEV1), predicted percentage | XVFzMF  | QoRiKP | 0 | 0.872773456484801 0.792465903708201 0.698683142069775 0.927015530957335 0.556477325950398 0.869082516445089 0.654587253626174 0.808966926527982 0.998652126985252 0.706017430280709 0.651876881368159 0.843586686376374 0.95676955449104 0.652851923571241                                      | rs10885477 rs11080063 rs111745969 rs113593397 rs116500994 rs12701617 rs1867876 rs4146507 rs6133067 rs73139538 rs80149660 rs9500080 rs9529719 rs967319                        |
| 578 | genus.LachnospiraceaeND3007group.id.11317 | Forced expiratory volume in 1-second (FEV1), predicted percentage | y0FJ9U  | QoRiKP | 0 | 0.598597661522013 0.0656623053832634 0.713384470277791                                                                                                                                                                                                                                          | rs2861203 rs72776675 rs9932954                                                                                                                                               |
| 579 | family.Methanobacteriaceae.id.121         | Forced expiratory volume in 1-second (FEV1), predicted percentage | Y7cF3n  | QoRiKP | 0 | 0.635151424543404 0.311568884883246 0.774634806315217 0.821878372278675 0.907553008559156 0.965311004993295 0.93324360363905 0.990448313468905                                                                                                                                                  | rs10424197 rs4257531 rs56131665 rs6508769 rs6776814 rs73068003 rs73457410 rs894996                                                                                           |
| 580 | genus.Butyricoccus.id.2055                | Forced expiratory volume in 1-second (FEV1), predicted percentage | yakWtY  | QoRiKP | 1 | 0.0491705508014162 0.177190028257226 0.515320772792739 0.343468012122762 0.369039367875915 0.272898741209282 0.68177071765352 0.460725484849155                                                                                                                                                 | rs10084203 rs12034718 rs12585793 rs2017189 rs4962426 rs56221232 rs62478070 rs7322368                                                                                         |
| 581 | genus.RuminococcaceaeUCG005.id.11363      | Forced expiratory volume in 1-second (FEV1), predicted percentage | yerlNC  | QoRiKP | 0 | 0.438266686216494 0.31811403328053 0.648616105432072 0.626599024879007 0.602656596301111 0.290728554421322 0.345294234189094 0.308135119464024 0.340119065965125 0.309432055369338 0.353962286680688 0.509264506008548 0.0977631710453667 0.435888053319058                                     | rs10873449 rs10937802 rs10950694 rs114279581 rs12288512 rs12458218 rs2893871 rs34781347 rs55793120 rs72776570 rs7449320 rs7555878 rs7586445 rs898577                         |
| 582 | family.Erysipelotrichaceae.id.2149        | Forced expiratory volume in 1-second (FEV1), predicted percentage | yfdJv6  | QoRiKP | 0 | 0.357155943941057 0.144603936317432 0.122883681631921 0.138981033960195 0.468571989530261 0.116962945288059 0.187268645581128 0.145134775856272 0.142095626739558 0.358859966383109 0.176132050654731 0.176084656935189 0.168581453488009                                                       | rs1074800 rs10781552 rs17530232 rs1884466 rs2300774 rs290833 rs35161940 rs4078432 rs56970041 rs62504403 rs7234058 rs7826267 rs8003149                                        |

|     | A                                      | B                                                                 | C      | D      | E  | F                                                                                                                                                                                                                                                                                                                                 | G                                                                                                                                                                                 |
|-----|----------------------------------------|-------------------------------------------------------------------|--------|--------|----|-----------------------------------------------------------------------------------------------------------------------------------------------------------------------------------------------------------------------------------------------------------------------------------------------------------------------------------|-----------------------------------------------------------------------------------------------------------------------------------------------------------------------------------|
| 583 | genus.Fusicatenibacter.id.11305        | Forced expiratory volume in 1-second (FEV1), predicted percentage | ygbSF7 | QoRiKP | 0  | 0.48884432415135 0.271193380332585 0.380797983618641 0.443731813144824 0.290967568571916 0.283053372889594 0.133267720107212 0.224566602455984 0.343017846391059 0.418593292507832 0.315341678775251 0.320584932005299 0.211629563349737 0.561765170786486 0.246977795672876 0.166592545511722 0.40855532391047 0.377859579693941 | rs10439674 rs167879 rs1864685 rs2025938 rs206581 rs2132128 rs3303 rs4378146 rs60254196 rs62187631 rs62353480 rs6515626 rs704418 rs73103914 rs792108 rs8028026 rs8063430 rs9905659 |
| 584 | family.FamilyXIII.id.1957              | Forced expiratory volume in 1-second (FEV1), predicted percentage | ylev3A | QoRiKP | 0  | 0.720293476172329 0.545509746121327 0.786949232147333 0.986497466457153 0.848936930699964 0.825488591091216 0.640241919655214 0.976847241705875 0.680907116320287 0.32441587662952                                                                                                                                                | rs10404377 rs118170811 rs12904405 rs1887048 rs3098182 rs482905 rs6501525 rs66753613 rs6797051 rs7514702                                                                           |
| 585 | genus.Senegalimassilia.id.11160        | Forced expiratory volume in 1-second (FEV1), predicted percentage | yLt27i | QoRiKP | 2  | 0.0392905322134877 0.17990104210682 0.0700169611134522 0.0361979075361614 0.0546111669666693                                                                                                                                                                                                                                      | rs10036909 rs11787826 rs1990708 rs2017373 rs7225245                                                                                                                               |
| 586 | genus.Alistipes.id.968                 | Forced expiratory volume in 1-second (FEV1), predicted percentage | YXZeGZ | QoRiKP | 0  | 0.560917018287271 0.458487461067015 0.433443059969043 0.813471594504054 0.550298073475734 0.307871246175861 0.531475545133227 0.443414694805139 0.276953808032767 0.383058697534212 0.241674968209439 0.871124404970361 0.532851749077998 0.589653735138291                                                                       | rs1107244 rs11769002 rs11958296 rs12990744 rs1689282 rs2290844 rs2450745 rs2875322 rs34417064 rs4810359 rs62576416 rs67705352 rs7129639 rs8130320                                 |
| 587 | genus.Gordonibacter.id.821             | Forced expiratory volume in 1-second (FEV1), predicted percentage | YYHfMs | QoRiKP | 1  | 0.188344883135343 0.130608897140264 0.150779469716504 0.0741545846714708 0.0419763233990523 0.144815445684682 0.0636522887429099 0.088584435370726 0.158096673745358 0.0949374775616793 0.0656951079285129                                                                                                                        | rs13412653 rs16955299 rs322296 rs35042269 rs3765837 rs4596722 rs71545975 rs72714787 rs72939513 rs7294633 rs768830                                                                 |
| 588 | genus.Oscillospira.id.2064             | Forced expiratory volume in 1-second (FEV1), predicted percentage | zaZf8A | QoRiKP | 0  | 0.0823120995346595 0.33764146146586 0.283974547356574 0.295912929630007 0.25415899132047 0.460722688798427 0.120343906406839 0.433623721568386                                                                                                                                                                                    | rs12206468 rs12925026 rs1954532 rs28889936 rs62422654 rs72866977 rs751183 rs8076323                                                                                               |
| 589 | class.Erysipelotrichia.id.2147         | Forced expiratory volume in 1-second (FEV1), predicted percentage | ZJXDpG | QoRiKP | 0  | 0.357155943941057 0.144603936317432 0.122883681631921 0.138981033960195 0.468571989530261 0.116962945288059 0.187268645581128 0.145134775856272 0.142095626739558 0.358859966383109 0.176132050654731 0.176084656935189 0.168581453488009                                                                                         | rs1074800 rs10781552 rs17530232 rs1884466 rs2300774 rs290833 rs35161940 rs4078432 rs56970041 rs62504403 rs7234058 rs7826267 rs8003149                                             |
| 590 | genus.Allisonella.id.2174              | Forced expiratory volume in 1-second (FEV1), predicted percentage | zkWLyl | QoRiKP | 0  | 0.52967554182912 0.903912456553442 0.520727786850127 0.407409077419745 0.747473616283469 0.148896477433259 0.397389402972812 0.54383538507032                                                                                                                                                                                     | rs1901739 rs35110698 rs35778461 rs594561 rs602075 rs6742198 rs76904847 rs7898615                                                                                                  |
| 591 | genus.Eggerthella.id.819               | COPD                                                              | 0aMbT3 | 1SSbcA | 0  | 0.270459275546296 0.502807221701329 0.217104913381263 0.197882203034651 0.603257823880032 0.219035183859526 0.50925743373266 0.618662597376129 0.207310824092658                                                                                                                                                                  | rs112205261 rs13070736 rs1784446 rs2223081 rs2240838 rs3851328 rs6430926 rs67490567 rs76663501                                                                                    |
| 592 | genus.Lactococcus.id.1851              | COPD                                                              | 0heWA4 | 1SSbcA | 1  | 0.356284547712141 0.0221867797408608 0.308812247411879 0.31543093695525 0.256858303296987 0.704721775693096 0.461415473370521 0.388383703473073                                                                                                                                                                                   | rs10417872 rs123059 rs12621813 rs17168302 rs2293361 rs4766997 rs55910161 rs6674304                                                                                                |
| 593 | genus.DefluviitaleaceaeUCG011.id.11287 | COPD                                                              | 0lsDJy | 1SSbcA | 0  | 0.53653740610285 0.79694628085641 0.690430576333741 0.738985909765202 0.797771647667724 0.70840243880825 0.782419205253408 0.88182706906292 0.601257928750466                                                                                                                                                                     | rs112893842 rs1582238 rs2892880 rs4344384 rs4677103 rs55658617 rs72731813 rs9608282 rs9725395                                                                                     |
| 594 | genus.Flavonifractor.id.2059           | COPD                                                              | 0ngO8p | 1SSbcA | 0  | 0.708204230145596 0.325813154214601 0.951543637754159 0.734481485930502 0.3671867615116                                                                                                                                                                                                                                           | rs114873521 rs11811696 rs12030302 rs34066017 rs806808                                                                                                                             |
| 595 | genus.Lachnospira.id.2004              | COPD                                                              | 0rTnk2 | 1SSbcA | 0  | 0.494958403869887 0.724930346495709 0.746406307924802 0.687633136763053 0.958631827158524 0.254393101238726                                                                                                                                                                                                                       | rs13157098 rs159484 rs2520509 rs4686798 rs4923324 rs56791201                                                                                                                      |
| 596 | phylum.Firmicutes.id.1672              | COPD                                                              | 0rWmph | 1SSbcA | 0  | 0.924686959194923 0.425033780693449 0.828649196582134 0.443235277524252 0.624859151780137 0.687354570735489 0.769375015567636 0.56319302227298 0.78564702000211 0.748541256727651 0.593625365732911 0.524964195530865 0.426917931850258 0.696247770408344                                                                         | rs112334273 rs2273429 rs2332027 rs2547978 rs3792064 rs3852931 rs4750583 rs56199908 rs6814436 rs6815608 rs7247191 rs72738886 rs72771021 rs8085381                                  |
| 597 | genus.Hungatella.id.11306              | COPD                                                              | 0Vfsi1 | 1SSbcA | 0  | 0.846316289620216 0.515724527931458 0.81978827163778 0.416169068265417 0.642003592079182                                                                                                                                                                                                                                          | rs10044993 rs13128780 rs13249325 rs17092615 rs72759041                                                                                                                            |
| 598 | genus.FamilyXIIICUG001.id.11294        | COPD                                                              | 1rpkul | 1SSbcA | 0  | 0.462270241656192 0.296354436496275 0.41458317025563 0.494625431714193 0.342773697020517 0.0989608487420303 0.79099710926629 0.138279682980485                                                                                                                                                                                    | rs112362903 rs12049454 rs1426266 rs3842897 rs62414802 rs7119679 rs76463770 rs8076666                                                                                              |
| 599 | genus.Escherichia.Shigella.id.3504     | COPD                                                              | 1uqUdL | 1SSbcA | 2  | 0.246961543560678 0.160886391415356 0.00893792096318864 0.226853492111957 0.0219560700358181 0.183402459470297 0.125291027143341 0.147731158893675 0.106700725412967 0.156176452299305                                                                                                                                            | rs112767262 rs113127095 rs113513883 rs1154904 rs118526 rs2798105 rs4731451 rs57024273 rs592299 rs73208162                                                                         |
| 600 | family.Streptococcaceae.id.1850        | COPD                                                              | 1zf0TZ | 1SSbcA | 0  | 0.10659200280902 0.151116539919787 0.378050087592447 0.175809726778694 0.0893843904396041 0.161297945230186 0.330743920161176 0.144432585165048 0.528113088420308 0.160034504964168                                                                                                                                               | rs10028567 rs11110281 rs16950051 rs2370083 rs35344081 rs57646748 rs6806351 rs77968078 rs7916711 rs957755                                                                          |
| 601 | genus.Holdemanella.id.11393            | COPD                                                              | 20HLOT | 1SSbcA | 11 | 0.000222849795079808 0.00113037822446461 0.000119339592515351 0.000313575746595068 0.000128579466426602 0.000240115957545482 0.00023665222662539 0.000109545638049833 4.33193652365048e-05 0.00085882719687408 0.00111303680084025                                                                                                | rs12513188 rs17586763 rs1926302 rs34187114 rs35228298 rs4541991 rs607782 rs62113381 rs73011279 rs75764681 rs8113760                                                               |
| 602 | genus.Ruminococcus2.id.11374           | COPD                                                              | 2GJP3o | 1SSbcA | 0  | 0.401606758283959 0.508862249286408 0.581371297828801 0.701813742906836 0.60502696498483 0.442133674960564 0.76301944979325 0.556865519602689 0.751701669685932 0.702261832830255 0.509366559384635 0.615557781520072 0.384935811569541 0.670199356524096 0.165837824292854                                                       | rs12406309 rs12986628 rs1819812 rs2368224 rs2846589 rs2997412 rs4400279 rs4799823 rs55707116 rs58681734 rs61791565 rs75140805 rs7635831 rs7693984 rs78120384                      |
| 603 | phylum.Euryarchaeota.id.55             | COPD                                                              | 2neTKK | 1SSbcA | 0  | 0.850230251634442 0.265956144916013 0.711971834020332 0.74256069817063 0.804239721964737 0.833259807486844 0.900535178925937 0.931572517525607 0.800909868284665 0.639161422744734                                                                                                                                                | rs11022995 rs34928225 rs45498998 rs6064552 rs6508769 rs7015093 rs76029318 rs7635189 rs77658038 rs894996                                                                           |

















|     | A                              | B    | C      | D      | E | F                                                                                                                                                                                                                                         | G                                                                                                                                     |
|-----|--------------------------------|------|--------|--------|---|-------------------------------------------------------------------------------------------------------------------------------------------------------------------------------------------------------------------------------------------|---------------------------------------------------------------------------------------------------------------------------------------|
| 782 | genus.Alistipes.id.968         | COPD | YXZeGZ | 1SSbcA | 0 | 0.46738552268083 0.461599177538917 0.185871168955286 0.554968182330177 0.539506572674305 0.328326149711321 0.476501422820174 0.253569999793756 0.199741843699566 0.399190085934103 0.149437316065652 0.267316402916208                    | rs1107244 rs11769002 rs11958296 rs12990744 rs1689282 rs2290844 rs2450745 rs2875322 rs34417064 rs4810359 rs7129639 rs8130320           |
| 783 | genus.Gordonibacter.id.821     | COPD | YYHfMs | 1SSbcA | 0 | 0.961721704709362 0.426621725741453 0.905274465618453 0.82177359828681 0.733228110206412 0.488724726090466 0.876453105083815 0.681515482437408 0.530981541536671 0.914198296076464 0.831303000988202                                      | rs13412653 rs16955299 rs322296 rs35042269 rs3765837 rs4596722 rs71545975 rs72714787 rs72939513 rs7294633 rs768830                     |
| 784 | genus.Oscillospira.id.2064     | COPD | zaZf8A | 1SSbcA | 0 | 0.489267406921593 0.227144824858258 0.202163485448482 0.0616243081257827 0.0979740078136907 0.244458772894923 0.193505216328175 0.0708434471851273                                                                                        | rs12206468 rs12925026 rs1954532 rs28889936 rs62422654 rs72866977 rs751183 rs8076323                                                   |
| 785 | class.Erysipelotrichia.id.2147 | COPD | ZJXDpG | 1SSbcA | 0 | 0.957706032571739 0.599611079292423 0.875340421871066 0.645770392468963 0.785069597673808 0.440307272524282 0.753027911817577 0.507570779107976 0.691521960578724 0.904710956546466 0.231698121262196 0.849168789255913 0.983673769764291 | rs1074800 rs10781552 rs17530232 rs1884466 rs2300774 rs290833 rs35161940 rs4078432 rs56970041 rs62504403 rs7234058 rs7826267 rs8003149 |
| 786 | genus.Allisonella.id.2174      | COPD | zkWLyl | 1SSbcA | 0 | 0.794813875366836 0.319048526702573 0.228069125584409 0.299594975499589 0.367372645051164 0.224547377997663 0.444809772744781 0.175590400492577                                                                                           | rs1901739 rs35110698 rs35778461 rs594561 rs602075 rs6742198 rs76904847 rs7898615                                                      |

|    | A                                                                                      | B                                                         | C                                         | D    | E            | F           | G           |
|----|----------------------------------------------------------------------------------------|-----------------------------------------------------------|-------------------------------------------|------|--------------|-------------|-------------|
| 1  | Supplementary table S9: Results of reverse analysis                                    |                                                           |                                           |      |              |             |             |
| 2  | outcome                                                                                | exposure                                                  | method                                    | nsnp | b            | se          | pval        |
| 3  | Gut microbiota abundance (order Clostridiales id.1863)    id:ebi-a-GCST90017095        | Forced expiratory volume in 1-second (FEV1), Best measure | MR Egger                                  | 187  | -0.132510264 | 0.181350266 | 0.465894777 |
| 4  | Gut microbiota abundance (order Clostridiales id.1863)    id:ebi-a-GCST90017095        | Forced expiratory volume in 1-second (FEV1), Best measure | Weighted median                           | 187  | -0.063805014 | 0.078346983 | 0.415421463 |
| 5  | Gut microbiota abundance (order Clostridiales id.1863)    id:ebi-a-GCST90017095        | Forced expiratory volume in 1-second (FEV1), Best measure | Inverse variance weighted (fixed effects) | 187  | -0.055746627 | 0.052531486 | 0.28859717  |
| 6  | Gut microbiota abundance (order Clostridiales id.1863)    id:ebi-a-GCST90017095        | Forced expiratory volume in 1-second (FEV1), Best measure | Simple mode                               | 187  | -0.113638608 | 0.23763839  | 0.63306964  |
| 7  | Gut microbiota abundance (order Clostridiales id.1863)    id:ebi-a-GCST90017095        | Forced expiratory volume in 1-second (FEV1), Best measure | Weighted mode                             | 187  | -0.075217537 | 0.198457275 | 0.705111824 |
| 8  | Gut microbiota abundance (order Desulfovibrionales id.3156)    id:ebi-a-GCST90017097   | Forced expiratory volume in 1-second (FEV1), Best measure | MR Egger                                  | 186  | -0.189621816 | 0.2038718   | 0.353536303 |
| 9  | Gut microbiota abundance (order Desulfovibrionales id.3156)    id:ebi-a-GCST90017097   | Forced expiratory volume in 1-second (FEV1), Best measure | Weighted median                           | 186  | 0.034819558  | 0.088773776 | 0.694889781 |
| 10 | Gut microbiota abundance (order Desulfovibrionales id.3156)    id:ebi-a-GCST90017097   | Forced expiratory volume in 1-second (FEV1), Best measure | Inverse variance weighted (fixed effects) | 186  | 0.030087133  | 0.057796967 | 0.602669173 |
| 11 | Gut microbiota abundance (order Desulfovibrionales id.3156)    id:ebi-a-GCST90017097   | Forced expiratory volume in 1-second (FEV1), Best measure | Simple mode                               | 186  | -0.040391435 | 0.260068286 | 0.876745562 |
| 12 | Gut microbiota abundance (order Desulfovibrionales id.3156)    id:ebi-a-GCST90017097   | Forced expiratory volume in 1-second (FEV1), Best measure | Weighted mode                             | 186  | 0.031181826  | 0.242739288 | 0.897926    |
| 13 | Gut microbiota abundance (order Erysipelotrichales id.2148)    id:ebi-a-GCST90017099   | Forced expiratory volume in 1-second (FEV1), Best measure | MR Egger                                  | 186  | -0.293130191 | 0.182445106 | 0.109840162 |
| 14 | Gut microbiota abundance (order Erysipelotrichales id.2148)    id:ebi-a-GCST90017099   | Forced expiratory volume in 1-second (FEV1), Best measure | Weighted median                           | 186  | -0.033393319 | 0.081513612 | 0.682051303 |
| 15 | Gut microbiota abundance (order Erysipelotrichales id.2148)    id:ebi-a-GCST90017099   | Forced expiratory volume in 1-second (FEV1), Best measure | Inverse variance weighted (fixed effects) | 186  | 0.007611522  | 0.052728505 | 0.885221662 |
| 16 | Gut microbiota abundance (order Erysipelotrichales id.2148)    id:ebi-a-GCST90017099   | Forced expiratory volume in 1-second (FEV1), Best measure | Simple mode                               | 186  | -0.050794233 | 0.223129987 | 0.820174294 |
| 17 | Gut microbiota abundance (order Erysipelotrichales id.2148)    id:ebi-a-GCST90017099   | Forced expiratory volume in 1-second (FEV1), Best measure | Weighted mode                             | 186  | -0.088276647 | 0.188421701 | 0.639974523 |
| 18 | Gut microbiota abundance (class Clostridia id.1859)    id:ebi-a-GCST90016913           | Forced expiratory volume in 1-second (FEV1), Best measure | MR Egger                                  | 187  | -0.13545775  | 0.181350183 | 0.456047875 |
| 19 | Gut microbiota abundance (class Clostridia id.1859)    id:ebi-a-GCST90016913           | Forced expiratory volume in 1-second (FEV1), Best measure | Weighted median                           | 187  | -0.07093009  | 0.077576194 | 0.3605445   |
| 20 | Gut microbiota abundance (class Clostridia id.1859)    id:ebi-a-GCST90016913           | Forced expiratory volume in 1-second (FEV1), Best measure | Inverse variance weighted (fixed effects) | 187  | -0.054147647 | 0.052531456 | 0.302650491 |
| 21 | Gut microbiota abundance (class Clostridia id.1859)    id:ebi-a-GCST90016913           | Forced expiratory volume in 1-second (FEV1), Best measure | Simple mode                               | 187  | -0.113278147 | 0.237206831 | 0.633531146 |
| 22 | Gut microbiota abundance (class Clostridia id.1859)    id:ebi-a-GCST90016913           | Forced expiratory volume in 1-second (FEV1), Best measure | Weighted mode                             | 187  | -0.062014249 | 0.187299312 | 0.740943895 |
| 23 | Gut microbiota abundance (class Deltaproteobacteria id.3087)    id:ebi-a-GCST90016915  | Forced expiratory volume in 1-second (FEV1), Best measure | MR Egger                                  | 186  | -0.183743786 | 0.203130738 | 0.366881769 |
| 24 | Gut microbiota abundance (class Deltaproteobacteria id.3087)    id:ebi-a-GCST90016915  | Forced expiratory volume in 1-second (FEV1), Best measure | Weighted median                           | 186  | 0.006052285  | 0.086801095 | 0.944411817 |
| 25 | Gut microbiota abundance (class Deltaproteobacteria id.3087)    id:ebi-a-GCST90016915  | Forced expiratory volume in 1-second (FEV1), Best measure | Inverse variance weighted (fixed effects) | 186  | 0.03477109   | 0.0577518   | 0.547122192 |
| 26 | Gut microbiota abundance (class Deltaproteobacteria id.3087)    id:ebi-a-GCST90016915  | Forced expiratory volume in 1-second (FEV1), Best measure | Simple mode                               | 186  | -0.064007769 | 0.26330021  | 0.808198767 |
| 27 | Gut microbiota abundance (class Deltaproteobacteria id.3087)    id:ebi-a-GCST90016915  | Forced expiratory volume in 1-second (FEV1), Best measure | Weighted mode                             | 186  | -0.035683965 | 0.228875284 | 0.876273891 |
| 28 | Gut microbiota abundance (class Erysipelotrichia id.2147)    id:ebi-a-GCST90016916     | Forced expiratory volume in 1-second (FEV1), Best measure | MR Egger                                  | 186  | -0.293130191 | 0.182445106 | 0.109840162 |
| 29 | Gut microbiota abundance (class Erysipelotrichia id.2147)    id:ebi-a-GCST90016916     | Forced expiratory volume in 1-second (FEV1), Best measure | Weighted median                           | 186  | -0.033393319 | 0.07953636  | 0.674595239 |
| 30 | Gut microbiota abundance (class Erysipelotrichia id.2147)    id:ebi-a-GCST90016916     | Forced expiratory volume in 1-second (FEV1), Best measure | Inverse variance weighted (fixed effects) | 186  | 0.007611522  | 0.052728505 | 0.885221662 |
| 31 | Gut microbiota abundance (class Erysipelotrichia id.2147)    id:ebi-a-GCST90016916     | Forced expiratory volume in 1-second (FEV1), Best measure | Simple mode                               | 186  | -0.050794233 | 0.226342582 | 0.822683562 |
| 32 | Gut microbiota abundance (class Erysipelotrichia id.2147)    id:ebi-a-GCST90016916     | Forced expiratory volume in 1-second (FEV1), Best measure | Weighted mode                             | 186  | -0.088276647 | 0.194276097 | 0.650082563 |
| 33 | Gut microbiota abundance (family Desulfovibrionaceae id.3169)    id:ebi-a-GCST90016935 | Forced vital capacity (FVC), Best measure                 | MR Egger                                  | 223  | -0.131163812 | 0.167606435 | 0.434717227 |
| 34 | Gut microbiota abundance (family Desulfovibrionaceae id.3169)    id:ebi-a-GCST90016935 | Forced vital capacity (FVC), Best measure                 | Weighted median                           | 223  | -0.081961621 | 0.079930809 | 0.305171127 |
| 35 | Gut microbiota abundance (family Desulfovibrionaceae id.3169)    id:ebi-a-GCST90016935 | Forced vital capacity (FVC), Best measure                 | Inverse variance weighted (fixed effects) | 223  | 0.003103968  | 0.052785862 | 0.953109005 |
| 36 | Gut microbiota abundance (family Desulfovibrionaceae id.3169)    id:ebi-a-GCST90016935 | Forced vital capacity (FVC), Best measure                 | Simple mode                               | 223  | -0.158450176 | 0.258828649 | 0.541044008 |
| 37 | Gut microbiota abundance (family Desulfovibrionaceae id.3169)    id:ebi-a-GCST90016935 | Forced vital capacity (FVC), Best measure                 | Weighted mode                             | 223  | -0.298272797 | 0.210678097 | 0.158242783 |
| 38 | Gut microbiota abundance (order Desulfovibrionales id.3156)    id:ebi-a-GCST90017097   | Forced vital capacity (FVC), Best measure                 | MR Egger                                  | 223  | -0.129174452 | 0.167699873 | 0.4419614   |
| 39 | Gut microbiota abundance (order Desulfovibrionales id.3156)    id:ebi-a-GCST90017097   | Forced vital capacity (FVC), Best measure                 | Weighted median                           | 223  | -0.086243339 | 0.081426574 | 0.289529328 |
| 40 | Gut microbiota abundance (order Desulfovibrionales id.3156)    id:ebi-a-GCST90017097   | Forced vital capacity (FVC), Best measure                 | Inverse variance weighted (fixed effects) | 223  | 0.00371717   | 0.052782242 | 0.943855681 |
| 41 | Gut microbiota abundance (order Desulfovibrionales id.3156)    id:ebi-a-GCST90017097   | Forced vital capacity (FVC), Best measure                 | Simple mode                               | 223  | -0.103811852 | 0.246353865 | 0.673875676 |
| 42 | Gut microbiota abundance (order Desulfovibrionales id.3156)    id:ebi-a-GCST90017097   | Forced vital capacity (FVC), Best measure                 | Weighted mode                             | 223  | -0.280221927 | 0.199353248 | 0.161224508 |
| 43 | Gut microbiota abundance (class Clostridia id.1859)    id:ebi-a-GCST90016913           | Forced vital capacity (FVC), Best measure                 | MR Egger                                  | 224  | -0.264671857 | 0.148368547 | 0.075808865 |
| 44 | Gut microbiota abundance (class Clostridia id.1859)    id:ebi-a-GCST90016913           | Forced vital capacity (FVC), Best measure                 | Weighted median                           | 224  | -0.102906114 | 0.070866651 | 0.146471252 |
| 45 | Gut microbiota abundance (class Clostridia id.1859)    id:ebi-a-GCST90016913           | Forced vital capacity (FVC), Best measure                 | Inverse variance weighted (fixed effects) | 224  | -0.068024799 | 0.047956577 | 0.156054608 |
| 46 | Gut microbiota abundance (class Clostridia id.1859)    id:ebi-a-GCST90016913           | Forced vital capacity (FVC), Best measure                 | Simple mode                               | 224  | -0.362862417 | 0.209288944 | 0.084337995 |
| 47 | Gut microbiota abundance (class Clostridia id.1859)    id:ebi-a-GCST90016913           | Forced vital capacity (FVC), Best measure                 | Weighted mode                             | 224  | -0.184253224 | 0.149673109 | 0.219605573 |
| 48 | Gut microbiota abundance (class Deltaproteobacteria id.3087)    id:ebi-a-GCST90016915  | Forced vital capacity (FVC), Best measure                 | MR Egger                                  | 223  | -0.139213311 | 0.16646503  | 0.403894175 |
| 49 | Gut microbiota abundance (class Deltaproteobacteria id.3087)    id:ebi-a-GCST90016915  | Forced vital capacity (FVC), Best measure                 | Weighted median                           | 223  | -0.055321963 | 0.083605182 | 0.508160334 |
| 50 | Gut microbiota abundance (class Deltaproteobacteria id.3087)    id:ebi-a-GCST90016915  | Forced vital capacity (FVC), Best measure                 | Inverse variance weighted (fixed effects) | 223  | 0.00919345   | 0.052740891 | 0.861619088 |
| 51 | Gut microbiota abundance (class Deltaproteobacteria id.3087)    id:ebi-a-GCST90016915  | Forced vital capacity (FVC), Best measure                 | Simple mode                               | 223  | -0.055884598 | 0.243775873 | 0.818888927 |

|    | A                                                                                     | B                                                                 | C                                         | D   | E            | F           | G           |
|----|---------------------------------------------------------------------------------------|-------------------------------------------------------------------|-------------------------------------------|-----|--------------|-------------|-------------|
| 52 | Gut microbiota abundance (class Deltaproteobacteria id.3087)    id:ebi-a-GCST90016915 | Forced vital capacity (FVC), Best measure                         | Weighted mode                             | 223 | -0.254789276 | 0.191424967 | 0.184549793 |
| 53 | Gut microbiota abundance (class Negativicutes id.2164)    id:ebi-a-GCST90016922       | Forced expiratory volume in 1-second (FEV1), predicted percentage | MR Egger                                  | 52  | 0.056926407  | 0.260240711 | 0.827738978 |
| 54 | Gut microbiota abundance (class Negativicutes id.2164)    id:ebi-a-GCST90016922       | Forced expiratory volume in 1-second (FEV1), predicted percentage | Weighted median                           | 52  | -0.08680369  | 0.078740722 | 0.270288261 |
| 55 | Gut microbiota abundance (class Negativicutes id.2164)    id:ebi-a-GCST90016922       | Forced expiratory volume in 1-second (FEV1), predicted percentage | Inverse variance weighted (fixed effects) | 52  | -0.085060865 | 0.053986929 | 0.115122035 |
| 56 | Gut microbiota abundance (class Negativicutes id.2164)    id:ebi-a-GCST90016922       | Forced expiratory volume in 1-second (FEV1), predicted percentage | Simple mode                               | 52  | -0.223060896 | 0.188777452 | 0.242841955 |
| 57 | Gut microbiota abundance (class Negativicutes id.2164)    id:ebi-a-GCST90016922       | Forced expiratory volume in 1-second (FEV1), predicted percentage | Weighted mode                             | 52  | -0.108754565 | 0.162368255 | 0.506005515 |
| 58 | Gut microbiota abundance (order Selenomonadales id.2165)    id:ebi-a-GCST90017107     | Forced expiratory volume in 1-second (FEV1), predicted percentage | MR Egger                                  | 52  | 0.056926407  | 0.260240711 | 0.827738978 |
| 59 | Gut microbiota abundance (order Selenomonadales id.2165)    id:ebi-a-GCST90017107     | Forced expiratory volume in 1-second (FEV1), predicted percentage | Weighted median                           | 52  | -0.08680369  | 0.079141136 | 0.272719483 |
| 60 | Gut microbiota abundance (order Selenomonadales id.2165)    id:ebi-a-GCST90017107     | Forced expiratory volume in 1-second (FEV1), predicted percentage | Inverse variance weighted (fixed effects) | 52  | -0.085060865 | 0.053986929 | 0.115122035 |
| 61 | Gut microbiota abundance (order Selenomonadales id.2165)    id:ebi-a-GCST90017107     | Forced expiratory volume in 1-second (FEV1), predicted percentage | Simple mode                               | 52  | -0.223060896 | 0.18646989  | 0.237138639 |
| 62 | Gut microbiota abundance (order Selenomonadales id.2165)    id:ebi-a-GCST90017107     | Forced expiratory volume in 1-second (FEV1), predicted percentage | Weighted mode                             | 52  | -0.108754565 | 0.155858988 | 0.488486865 |
| 63 | Gut microbiota abundance (family Family XIII id.1957)    id:ebi-a-GCST90016939        | COPD                                                              | MR Egger                                  | 40  | -0.022558687 | 0.079116223 | 0.777090207 |
| 64 | Gut microbiota abundance (family Family XIII id.1957)    id:ebi-a-GCST90016939        | COPD                                                              | Weighted median                           | 40  | -0.015756975 | 0.044322781 | 0.72221122  |
| 65 | Gut microbiota abundance (family Family XIII id.1957)    id:ebi-a-GCST90016939        | COPD                                                              | Inverse variance weighted (fixed effects) | 40  | -0.015887043 | 0.026436257 | 0.547868878 |
| 66 | Gut microbiota abundance (family Family XIII id.1957)    id:ebi-a-GCST90016939        | COPD                                                              | Simple mode                               | 40  | 0.02211057   | 0.074709262 | 0.768834735 |
| 67 | Gut microbiota abundance (family Family XIII id.1957)    id:ebi-a-GCST90016939        | COPD                                                              | Weighted mode                             | 40  | -0.009731482 | 0.049884709 | 0.846343502 |
| 68 | Gut microbiota abundance (genus Holdemanella id.11393)    id:ebi-a-GCST90017014       | COPD                                                              | MR Egger                                  | 40  | -0.01054115  | 0.118573814 | 0.92962869  |
| 69 | Gut microbiota abundance (genus Holdemanella id.11393)    id:ebi-a-GCST90017014       | COPD                                                              | Weighted median                           | 40  | 0.062047433  | 0.057042754 | 0.276711857 |
| 70 | Gut microbiota abundance (genus Holdemanella id.11393)    id:ebi-a-GCST90017014       | COPD                                                              | Inverse variance weighted (fixed effects) | 40  | 0.034550441  | 0.039017984 | 0.375886802 |
| 71 | Gut microbiota abundance (genus Holdemanella id.11393)    id:ebi-a-GCST90017014       | COPD                                                              | Simple mode                               | 40  | 0.130477595  | 0.128476835 | 0.316092077 |
| 72 | Gut microbiota abundance (genus Holdemanella id.11393)    id:ebi-a-GCST90017014       | COPD                                                              | Weighted mode                             | 40  | -0.055672197 | 0.082669659 | 0.504645571 |
